# Supplementary material for: Genome reorganization and its functional impact during breast cancer progression
Source: bioRxiv preprint, doi:10.1101/2025.05.14.654144, version 5 (2026-05-23)
Supplement: Supplemental Table 3 [file 654144_file21.xlsx]

## Sheet: TableS3-loops
seqnames1	start1	end1	width1	strand1	seqnames2	start2	end2	width2	strand2	MCF10_A	MCF10_T	MCF10_C	mega	mean.APScoreAvg	name	span	avgCount	maxCount	ATlfc	AClfc	TClfc	padj	ATdiff	ACdiff	TCdiff	MCF10_A_1_1_contact_map.hic	MCF10_A_1_2_contact_map.hic	MCF10_A_1_3_contact_map.hic	MCF10_A_1_4_contact_map.hic	MCF10_A_2_1_contact_map.hic	MCF10_A_2_2_contact_map.hic	MCF10_A_2_3_contact_map.hic	MCF10_A_2_4_contact_map.hic	MCF10_T_1_1_contact_map.hic	MCF10_T_1_2_contact_map.hic	MCF10_T_1_3_contact_map.hic	MCF10_T_1_4_contact_map.hic	MCF10_T_2_1_contact_map.hic	MCF10_T_2_2_contact_map.hic	MCF10_T_2_3_contact_map.hic	MCF10_T_2_4_contact_map.hic	MCF10_C_1_1_contact_map.hic	MCF10_C_1_2_contact_map.hic	MCF10_C_1_3_contact_map.hic	MCF10_C_1_4_contact_map.hic	MCF10_C_2_1_contact_map.hic	MCF10_C_2_2_contact_map.hic	MCF10_C_2_3_contact_map.hic	MCF10_C_2_4_contact_map.hic
chr1	900000	910000	10001	*	chr1	940000	950000	10001	*	FALSE	TRUE	FALSE	FALSE	3.20193	loop_1	50000	8.83333	18	-0.359675	-0.485017	-0.125342	0.504834	FALSE	FALSE	FALSE	12	12	7	10	12	11	8	8	10	10	7	17	7	5	6	6	7	5	6	2	9	7	10	18
chr1	980000	990000	10001	*	chr1	1290000	1300000	10001	*	FALSE	TRUE	TRUE	TRUE	3.89042	loop_2	320000	3.70833	9	-0.0651462	0.89224	0.957386	0.277897	FALSE	FALSE	FALSE	6	2	4	2	0	2	5	2	5	0	7	4	3	3	0	2	8	5	3	4	3	9	4	6
chr1	990000	1000000	10001	*	chr1	1250000	1260000	10001	*	FALSE	TRUE	FALSE	FALSE	3.56747	loop_3	270000	2.16667	6	0.630835	-0.0277124	-0.658548	0.71975	FALSE	FALSE	FALSE	0	1	0	3	0	3	6	1	3	6	2	6	1	1	3	1	1	1	1	1	4	3	3	1
chr1	1010000	1020000	10001	*	chr1	1060000	1070000	10001	*	TRUE	TRUE	FALSE	TRUE	2.94079	loop_4	60000	9.16667	14	-0.363562	-0.827397	-0.463835	0.14248	FALSE	FALSE	FALSE	11	8	13	11	12	14	10	10	11	10	13	12	8	7	4	10	1	7	3	9	12	8	9	7
chr1	1120000	1130000	10001	*	chr1	1230000	1240000	10001	*	TRUE	TRUE	FALSE	TRUE	3.31594	loop_5	120000	7.625	15	-0.168415	-0.323136	-0.154721	0.787465	FALSE	FALSE	FALSE	8	4	4	7	13	10	8	9	13	9	6	8	7	6	6	5	2	5	4	5	15	9	12	8
chr1	1120000	1130000	10001	*	chr1	1260000	1270000	10001	*	FALSE	FALSE	FALSE	TRUE	3.1388	loop_6	150000	7.29167	15	-0.022099	-0.238086	-0.215987	0.861912	FALSE	FALSE	FALSE	7	8	9	5	9	7	6	7	9	8	9	11	8	4	8	5	6	6	6	2	15	9	4	7
chr1	1120000	1130000	10001	*	chr1	1290000	1300000	10001	*	FALSE	FALSE	TRUE	FALSE	3.41919	loop_7	180000	6.04167	12	-0.521267	-0.129645	0.391622	0.598317	FALSE	FALSE	FALSE	7	3	7	4	6	5	11	9	6	6	4	8	3	4	2	6	3	4	6	6	7	8	8	12
chr1	1390000	1400000	10001	*	chr1	1500000	1510000	10001	*	FALSE	FALSE	TRUE	FALSE	2.70625	loop_8	120000	4.79167	9	-0.267025	0.303346	0.570371	0.620888	FALSE	FALSE	FALSE	1	4	5	3	6	6	3	7	5	5	4	4	4	4	1	4	2	4	6	5	6	9	9	8
chr1	1760000	1770000	10001	*	chr1	1900000	1910000	10001	*	TRUE	FALSE	FALSE	TRUE	4.23514	loop_9	150000	7	15	-0.495851	-0.142562	0.353289	0.600167	FALSE	FALSE	FALSE	7	8	6	9	3	15	6	8	10	5	6	5	5	8	2	6	7	5	9	6	9	6	8	9
chr1	1790000	1800000	10001	*	chr1	1860000	1870000	10001	*	FALSE	FALSE	TRUE	FALSE	1.95651	loop_10	80000	7.58333	15	-0.314843	0.153077	0.467921	0.619117	FALSE	FALSE	FALSE	6	4	10	10	8	10	7	4	3	8	14	7	6	7	4	3	11	5	5	6	8	10	15	11
chr1	1960000	1970000	10001	*	chr1	2040000	2050000	10001	*	TRUE	TRUE	TRUE	TRUE	4.95223	loop_11	90000	14.0833	26	-0.447778	-0.126689	0.321089	0.446303	FALSE	FALSE	FALSE	17	10	16	25	13	14	17	10	18	26	13	14	10	4	10	5	16	10	11	13	16	17	12	21
chr1	2190000	2200000	10001	*	chr1	2380000	2390000	10001	*	TRUE	TRUE	TRUE	TRUE	10.6386	loop_12	200000	17.3333	28	0.118673	0.0618502	-0.0568225	0.941175	FALSE	FALSE	FALSE	17	22	14	14	15	19	15	11	22	28	23	27	16	11	16	10	22	14	9	26	13	15	17	20
chr1	2190000	2200000	10001	*	chr1	2540000	2550000	10001	*	FALSE	FALSE	FALSE	TRUE	3.7549	loop_13	360000	2.375	6	0.0170683	0.129108	0.11204	0.987502	FALSE	FALSE	FALSE	1	2	0	1	4	2	6	1	3	4	0	6	0	0	2	4	3	3	1	1	4	3	4	2
chr1	2230000	2240000	10001	*	chr1	2310000	2320000	10001	*	TRUE	FALSE	TRUE	TRUE	2.654	loop_14	90000	9.04167	14	-0.140262	-0.594063	-0.4538	0.405127	FALSE	FALSE	FALSE	14	4	8	14	11	13	9	8	11	9	13	10	10	5	10	11	7	7	5	12	6	6	3	11
chr1	2410000	2420000	10001	*	chr1	2540000	2550000	10001	*	TRUE	TRUE	TRUE	TRUE	7.44858	loop_15	140000	11.875	25	-0.655523	-0.554657	0.100866	0.527339	FALSE	FALSE	FALSE	7	10	10	11	25	15	18	19	16	16	12	14	9	8	8	5	11	12	13	13	8	9	13	3
chr1	2420000	2430000	10001	*	chr1	3420000	3430000	10001	*	FALSE	TRUE	FALSE	TRUE	4.55351	loop_16	1010000	4	10	0.206457	-0.140203	-0.346661	0.87834	FALSE	FALSE	FALSE	0	3	6	3	4	5	3	5	7	6	5	1	5	10	3	1	7	1	4	2	4	2	6	3
chr1	2560000	2570000	10001	*	chr1	3420000	3430000	10001	*	TRUE	FALSE	FALSE	TRUE	4.12789	loop_17	870000	3.125	7	-0.640363	-0.763639	-0.123276	0.535882	FALSE	FALSE	FALSE	5	2	3	2	7	3	3	7	7	1	4	3	2	1	1	4	2	3	1	5	1	4	1	3
chr1	3490000	3500000	10001	*	chr1	3620000	3630000	10001	*	TRUE	TRUE	TRUE	TRUE	5.57855	loop_18	140000	9.95833	21	-0.327349	0.0442776	0.371627	0.721874	FALSE	FALSE	FALSE	7	4	10	8	13	16	9	12	18	12	12	6	6	6	8	6	21	11	9	11	9	8	10	7
chr1	3910000	3920000	10001	*	chr1	5510000	5520000	10001	*	FALSE	FALSE	FALSE	TRUE	3.18086	loop_19	1610000	2.83333	7	-0.105693	-0.302502	-0.196809	0.936639	FALSE	FALSE	FALSE	7	0	5	1	2	3	4	2	1	3	3	5	3	4	5	0	1	7	2	2	2	3	1	2
chr1	3910000	3920000	10001	*	chr1	5740000	5750000	10001	*	FALSE	FALSE	TRUE	TRUE	4.30895	loop_20	1840000	3.70833	7	0.760046	0.784935	0.0248891	0.481814	FALSE	FALSE	FALSE	2	3	3	0	3	2	3	3	1	4	3	7	3	6	5	6	2	7	3	6	7	2	3	5
chr1	3910000	3920000	10001	*	chr1	5910000	5920000	10001	*	FALSE	FALSE	FALSE	TRUE	3.34721	loop_21	2010000	2.83333	6	1.12075	0.906061	-0.214689	0.364867	FALSE	FALSE	FALSE	2	1	2	3	2	0	1	2	0	6	3	5	5	4	6	1	3	4	5	2	1	3	4	3
chr1	5510000	5520000	10001	*	chr1	5740000	5750000	10001	*	TRUE	TRUE	FALSE	TRUE	3.66255	loop_22	240000	8.45833	18	-0.868082	-0.801198	0.0668837	0.0734874	FALSE	FALSE	FALSE	18	7	13	11	14	5	9	16	8	10	7	11	5	3	8	4	8	9	8	6	5	6	5	7
chr1	5510000	5520000	10001	*	chr1	5910000	5920000	10001	*	FALSE	FALSE	FALSE	TRUE	2.99545	loop_23	410000	3.79167	9	0.729605	0.191477	-0.538128	0.519286	FALSE	FALSE	FALSE	2	4	2	3	1	4	3	4	3	6	4	4	7	6	4	6	2	2	9	2	5	2	4	2
chr1	5630000	5640000	10001	*	chr1	5740000	5750000	10001	*	TRUE	FALSE	FALSE	FALSE	3.61671	loop_24	120000	6.58333	18	-2.37489	-2.43105	-0.056159	6.17668e-12	TRUE	TRUE	FALSE	14	16	15	17	11	11	18	10	5	4	2	8	2	1	1	1	1	4	4	0	2	3	4	4
chr1	6100000	6110000	10001	*	chr1	6180000	6190000	10001	*	FALSE	TRUE	TRUE	TRUE	2.93501	loop_25	90000	11.875	24	0.278795	0.422783	0.143988	0.564184	FALSE	FALSE	FALSE	5	14	11	7	11	9	8	11	12	22	15	17	6	12	10	8	8	15	12	14	15	7	12	24
chr1	6240000	6250000	10001	*	chr1	6340000	6350000	10001	*	TRUE	TRUE	TRUE	TRUE	5.59131	loop_26	110000	14.5833	25	-0.215493	-0.649413	-0.433919	0.153039	FALSE	FALSE	FALSE	22	18	15	12	13	22	12	19	25	14	14	23	18	12	7	12	11	7	9	10	14	17	12	12
chr1	6240000	6250000	10001	*	chr1	6400000	6410000	10001	*	TRUE	TRUE	TRUE	TRUE	4.73503	loop_27	170000	8.79167	17	-0.254395	-0.382176	-0.127781	0.695076	FALSE	FALSE	FALSE	8	7	4	9	17	11	8	12	13	8	11	14	5	6	10	3	8	6	6	6	11	6	12	10
chr1	6360000	6370000	10001	*	chr1	6400000	6410000	10001	*	TRUE	TRUE	TRUE	TRUE	2.97564	loop_28	50000	18.7917	31	0.0153492	-0.304853	-0.320202	0.541968	FALSE	FALSE	FALSE	22	14	18	22	18	25	17	16	20	28	28	31	20	16	13	13	18	10	14	20	19	11	21	17
chr1	6540000	6550000	10001	*	chr1	6640000	6650000	10001	*	TRUE	FALSE	FALSE	FALSE	2.41934	loop_29	110000	6.66667	14	-0.343803	-0.130846	0.212957	0.790788	FALSE	FALSE	FALSE	10	9	11	7	4	8	5	4	7	5	14	4	4	5	3	7	5	10	4	6	6	6	7	9
chr1	6720000	6730000	10001	*	chr1	6880000	6890000	10001	*	FALSE	FALSE	TRUE	TRUE	4.08412	loop_30	170000	8.54167	24	0.239461	1.31943	1.07997	0.00103658	FALSE	TRUE	TRUE	7	3	5	8	7	5	2	5	13	12	9	6	4	3	4	4	9	12	14	8	11	14	16	24
chr1	6720000	6730000	10001	*	chr1	7200000	7210000	10001	*	TRUE	TRUE	TRUE	TRUE	5.15819	loop_31	490000	5	11	0.26744	0.131299	-0.136141	0.917932	FALSE	FALSE	FALSE	6	5	6	6	3	6	2	2	6	4	7	7	8	3	11	0	8	4	8	5	1	5	1	6
chr1	6720000	6730000	10001	*	chr1	7060000	7070000	10001	*	TRUE	FALSE	FALSE	TRUE	3.88718	loop_32	350000	6.45833	14	-0.0334381	-0.241811	-0.208373	0.890512	FALSE	FALSE	FALSE	9	14	8	6	5	4	7	1	7	14	13	8	5	6	2	3	6	3	4	10	6	2	4	8
chr1	6720000	6730000	10001	*	chr1	7640000	7650000	10001	*	FALSE	FALSE	FALSE	TRUE	3.49032	loop_33	930000	3	6	-0.19515	-0.417977	-0.222828	0.857332	FALSE	FALSE	FALSE	6	5	2	5	2	4	2	1	6	4	1	1	5	2	2	4	3	3	4	1	2	2	2	3
chr1	6790000	6800000	10001	*	chr1	6890000	6900000	10001	*	TRUE	TRUE	TRUE	TRUE	4.75169	loop_34	110000	16.7083	32	-0.32625	-0.491729	-0.165479	0.270255	FALSE	FALSE	FALSE	27	26	21	20	14	13	18	15	23	18	25	32	10	6	13	10	13	13	13	13	17	11	14	16
chr1	7040000	7050000	10001	*	chr1	7210000	7220000	10001	*	TRUE	FALSE	FALSE	TRUE	3.07728	loop_35	180000	8.125	13	-0.662876	-0.0811245	0.581751	0.330646	FALSE	FALSE	FALSE	7	8	11	11	11	8	9	8	6	12	3	9	8	3	6	4	13	11	10	6	6	9	9	7
chr1	7040000	7050000	10001	*	chr1	7640000	7650000	10001	*	TRUE	TRUE	TRUE	TRUE	4.84571	loop_36	610000	9.25	14	-0.377374	-0.489464	-0.11209	0.485368	FALSE	FALSE	FALSE	10	14	7	13	11	8	9	14	13	11	13	9	10	5	4	8	10	8	10	7	6	7	7	8
chr1	7220000	7230000	10001	*	chr1	7540000	7550000	10001	*	FALSE	FALSE	TRUE	FALSE	3.13579	loop_37	330000	4.91667	9	0.0609078	0.857457	0.796549	0.210879	FALSE	FALSE	FALSE	5	3	6	4	1	2	4	5	9	6	3	5	2	2	3	4	6	4	9	7	7	7	5	9
chr1	7660000	7670000	10001	*	chr1	7750000	7760000	10001	*	TRUE	TRUE	TRUE	TRUE	7.96764	loop_38	100000	21.375	34	0.00987468	-0.119175	-0.12905	0.90201	FALSE	FALSE	FALSE	34	26	21	18	14	15	20	22	30	32	22	30	16	17	22	17	18	25	23	22	13	21	18	17
chr1	7660000	7670000	10001	*	chr1	7900000	7910000	10001	*	TRUE	FALSE	TRUE	TRUE	6.35853	loop_39	250000	7.875	13	0.0215354	0.439278	0.417742	0.543785	FALSE	FALSE	FALSE	8	10	6	10	7	2	4	7	10	11	10	9	4	7	8	1	8	8	9	5	11	9	12	13
chr1	7800000	7810000	10001	*	chr1	7900000	7910000	10001	*	TRUE	TRUE	FALSE	TRUE	5.28339	loop_40	110000	15.125	35	-0.267153	-0.914152	-0.646999	0.0150711	FALSE	TRUE	TRUE	21	35	17	23	13	12	14	14	14	31	20	14	14	9	19	12	9	8	12	6	12	11	12	11
chr1	7970000	7980000	10001	*	chr1	8310000	8320000	10001	*	TRUE	TRUE	FALSE	TRUE	6.81763	loop_41	350000	15.6667	24	0.0385988	-0.00444872	-0.0430475	0.988947	FALSE	FALSE	FALSE	16	14	20	18	11	14	17	9	19	20	21	17	15	8	18	14	15	12	14	12	16	21	24	11
chr1	7970000	7980000	10001	*	chr1	8340000	8350000	10001	*	FALSE	FALSE	TRUE	FALSE	7.61288	loop_42	380000	13.625	25	0.053663	0.426525	0.372862	0.388796	FALSE	FALSE	FALSE	14	14	17	11	11	9	10	6	20	12	14	16	10	12	11	8	8	13	9	17	25	19	20	21
chr1	8030000	8040000	10001	*	chr1	8090000	8100000	10001	*	FALSE	TRUE	TRUE	FALSE	2.59347	loop_43	70000	14.3333	27	0.14771	0.678889	0.531179	0.0901848	FALSE	FALSE	FALSE	15	12	11	15	13	7	9	6	22	11	9	14	14	7	19	9	16	16	12	12	23	27	22	23
chr1	8030000	8040000	10001	*	chr1	8200000	8210000	10001	*	FALSE	FALSE	FALSE	TRUE	3.0846	loop_44	180000	10.1667	15	0.0103287	-0.0280582	-0.0383869	0.995763	FALSE	FALSE	FALSE	9	11	13	9	7	8	6	15	14	8	9	10	10	13	13	7	9	9	14	5	13	9	10	13
chr1	8030000	8040000	10001	*	chr1	8240000	8250000	10001	*	TRUE	FALSE	FALSE	TRUE	2.62425	loop_45	220000	9.75	18	-0.464038	-0.630254	-0.166216	0.274754	FALSE	FALSE	FALSE	18	11	15	11	5	14	11	9	15	10	10	11	5	6	7	10	4	6	4	10	16	3	10	13
chr1	8030000	8040000	10001	*	chr1	8310000	8320000	10001	*	TRUE	FALSE	FALSE	FALSE	3.95948	loop_46	290000	13.6667	24	0.207771	0.20023	-0.00754117	0.805088	FALSE	FALSE	FALSE	14	14	15	10	7	10	10	14	22	13	15	21	15	12	11	9	15	13	11	7	24	17	10	19
chr1	8420000	8430000	10001	*	chr1	8510000	8520000	10001	*	TRUE	TRUE	TRUE	TRUE	2.32563	loop_47	100000	7.66667	24	-0.00305556	0.400747	0.403802	0.665405	FALSE	FALSE	FALSE	11	12	8	9	6	5	2	1	19	9	8	7	6	2	5	3	10	5	3	8	8	10	3	24
chr1	8550000	8560000	10001	*	chr1	8670000	8680000	10001	*	FALSE	TRUE	FALSE	TRUE	2.89425	loop_48	130000	8.41667	14	0.216594	0.197095	-0.0194996	0.877628	FALSE	FALSE	FALSE	11	7	8	9	12	3	2	6	13	14	10	6	14	2	8	6	5	7	7	4	10	13	12	13
chr1	8560000	8570000	10001	*	chr1	8720000	8730000	10001	*	TRUE	TRUE	TRUE	TRUE	4.91288	loop_49	170000	13.125	32	-0.021223	0.364106	0.385329	0.494466	FALSE	FALSE	FALSE	15	21	12	21	6	4	7	9	21	14	11	15	9	12	7	9	14	7	14	13	13	18	11	32
chr1	8560000	8570000	10001	*	chr1	8840000	8850000	10001	*	FALSE	TRUE	TRUE	TRUE	4.86435	loop_50	290000	6.625	15	0.346307	0.262129	-0.0841785	0.781596	FALSE	FALSE	FALSE	3	4	10	9	4	5	4	5	4	9	15	10	9	3	4	6	6	3	7	7	5	5	11	11
chr1	8730000	8740000	10001	*	chr1	8840000	8850000	10001	*	TRUE	TRUE	FALSE	FALSE	2.66559	loop_51	120000	8.79167	16	-0.0544359	0.103506	0.157942	0.935193	FALSE	FALSE	FALSE	6	8	9	9	5	15	6	8	7	13	9	10	8	8	4	9	5	8	11	5	15	10	7	16
chr1	8910000	8920000	10001	*	chr1	8990000	9000000	10001	*	TRUE	TRUE	TRUE	TRUE	4.78899	loop_52	90000	13.5833	24	-0.203974	0.10161	0.305583	0.713582	FALSE	FALSE	FALSE	12	19	11	15	12	10	10	18	13	24	12	15	6	8	14	10	15	17	13	16	21	13	11	11
chr1	8910000	8920000	10001	*	chr1	9100000	9110000	10001	*	TRUE	TRUE	FALSE	TRUE	4.14899	loop_53	200000	5.70833	17	0.833561	0.138458	-0.695103	0.236422	FALSE	FALSE	FALSE	8	5	3	4	2	7	0	5	17	10	10	13	6	3	2	6	3	4	5	6	3	8	3	4
chr1	9000000	9010000	10001	*	chr1	9100000	9110000	10001	*	TRUE	TRUE	FALSE	TRUE	4.25374	loop_54	110000	10.1667	20	-0.407196	-0.600075	-0.192879	0.296237	FALSE	FALSE	FALSE	16	14	14	14	7	13	7	12	16	17	7	20	6	5	5	6	9	9	6	5	10	10	4	12
chr1	9120000	9130000	10001	*	chr1	9240000	9250000	10001	*	FALSE	TRUE	FALSE	FALSE	2.63795	loop_55	130000	4.70833	10	0.463657	-0.821387	-1.28504	0.0888532	FALSE	FALSE	FALSE	3	5	3	5	7	7	2	4	5	7	9	6	10	7	5	4	6	2	1	0	7	3	3	2
chr1	9140000	9150000	10001	*	chr1	9190000	9200000	10001	*	TRUE	FALSE	FALSE	FALSE	3.24197	loop_56	60000	14.125	25	-0.367038	-0.635122	-0.268084	0.152178	FALSE	FALSE	FALSE	21	19	13	25	11	18	13	14	16	16	10	21	12	12	14	10	7	7	12	6	12	15	16	19
chr1	9260000	9270000	10001	*	chr1	9580000	9590000	10001	*	FALSE	FALSE	FALSE	TRUE	3.04074	loop_57	330000	4.58333	9	1.26554	0.973842	-0.291693	0.117375	FALSE	FALSE	FALSE	3	5	4	1	3	1	1	1	2	9	4	9	7	7	4	7	1	3	4	5	9	5	7	8
chr1	9280000	9290000	10001	*	chr1	9450000	9460000	10001	*	FALSE	TRUE	TRUE	TRUE	5.80751	loop_58	180000	17.7083	29	0.249481	0.529193	0.279712	0.232349	FALSE	FALSE	FALSE	17	19	21	23	8	9	9	9	29	25	19	25	9	16	13	11	24	19	20	8	22	20	29	21
chr1	9280000	9290000	10001	*	chr1	9490000	9500000	10001	*	TRUE	FALSE	FALSE	FALSE	8.2062	loop_59	220000	12.125	22	-0.334314	-0.387291	-0.0529766	0.553501	FALSE	FALSE	FALSE	17	13	18	13	12	14	9	11	22	17	10	20	12	5	7	2	12	4	6	3	13	19	17	15
chr1	9490000	9500000	10001	*	chr1	9570000	9580000	10001	*	TRUE	TRUE	FALSE	TRUE	5.33299	loop_60	90000	12.7917	25	-0.279549	-0.148724	0.130825	0.744046	FALSE	FALSE	FALSE	15	12	15	25	11	11	11	9	15	15	17	16	9	10	7	8	9	14	11	8	8	17	13	21
chr1	9620000	9630000	10001	*	chr1	9700000	9710000	10001	*	FALSE	FALSE	TRUE	FALSE	2.096	loop_61	90000	7.58333	17	-0.0596546	-0.0729935	-0.0133389	0.985903	FALSE	FALSE	FALSE	6	5	9	9	12	5	7	5	12	10	9	4	7	6	10	3	4	4	7	5	17	7	9	10
chr1	9620000	9630000	10001	*	chr1	9860000	9870000	10001	*	TRUE	TRUE	FALSE	TRUE	4.9624	loop_62	250000	5	13	0.834215	-0.476736	-1.31095	0.048356	FALSE	FALSE	FALSE	4	6	6	2	2	5	2	5	13	8	12	3	9	4	8	5	0	5	0	2	6	5	4	4
chr1	9780000	9790000	10001	*	chr1	9860000	9870000	10001	*	TRUE	TRUE	TRUE	TRUE	5.09657	loop_63	90000	18.8333	32	0.0104862	0.0243799	0.0138937	0.997076	FALSE	FALSE	FALSE	18	24	23	23	15	15	16	10	24	21	24	32	15	18	10	13	14	12	17	19	22	23	24	20
chr1	9940000	9950000	10001	*	chr1	10150000	10160000	10001	*	TRUE	TRUE	FALSE	TRUE	3.11078	loop_64	220000	6.125	15	-0.244036	-0.332246	-0.0882109	0.811184	FALSE	FALSE	FALSE	10	7	4	15	2	6	5	4	11	6	4	5	7	6	6	3	5	5	2	2	12	6	8	6
chr1	10530000	10540000	10001	*	chr1	10630000	10640000	10001	*	TRUE	FALSE	FALSE	FALSE	2.5837	loop_65	110000	6.75	13	-0.576817	-0.209751	0.367066	0.505428	FALSE	FALSE	FALSE	8	8	13	11	2	9	6	5	10	5	7	6	5	7	4	1	9	3	4	6	9	8	9	7
chr1	10530000	10540000	10001	*	chr1	10860000	10870000	10001	*	TRUE	TRUE	FALSE	TRUE	4.20554	loop_66	340000	9.125	17	0.119891	-0.123447	-0.243338	0.855742	FALSE	FALSE	FALSE	10	8	14	5	7	8	7	10	15	15	9	10	5	8	17	3	9	4	8	6	13	9	8	11
chr1	10690000	10700000	10001	*	chr1	10790000	10800000	10001	*	FALSE	FALSE	FALSE	TRUE	2.43536	loop_67	110000	11.0417	22	-0.218911	0.485552	0.704463	0.191874	FALSE	FALSE	FALSE	6	12	6	8	13	15	6	11	7	22	9	8	6	10	4	7	18	8	10	12	22	16	11	18
chr1	10690000	10700000	10001	*	chr1	10860000	10870000	10001	*	TRUE	TRUE	FALSE	TRUE	3.52012	loop_68	180000	11	18	-0.370179	-0.299497	0.0706813	0.649928	FALSE	FALSE	FALSE	10	14	8	16	11	13	7	18	17	15	15	15	1	11	3	7	11	4	9	15	15	8	4	17
chr1	11030000	11040000	10001	*	chr1	11640000	11650000	10001	*	FALSE	FALSE	FALSE	TRUE	4.57535	loop_69	620000	3.66667	9	-0.201413	0.512257	0.71367	0.583201	FALSE	FALSE	FALSE	3	3	2	2	4	2	2	7	1	5	9	4	0	4	0	2	5	6	1	6	6	7	3	4
chr1	11240000	11250000	10001	*	chr1	11640000	11650000	10001	*	TRUE	TRUE	FALSE	TRUE	6.43961	loop_70	410000	8.54167	19	0.379499	-0.0186198	-0.398119	0.592934	FALSE	FALSE	FALSE	6	16	11	10	8	3	3	3	16	19	9	10	10	13	5	3	7	7	2	5	10	10	11	8
chr1	11330000	11340000	10001	*	chr1	11640000	11650000	10001	*	FALSE	FALSE	FALSE	TRUE	2.92586	loop_71	320000	6.25	11	0.175835	-0.597628	-0.773463	0.30026	FALSE	FALSE	FALSE	3	6	6	11	6	8	5	6	11	10	10	9	9	6	4	4	5	6	2	3	6	5	4	5
chr1	11830000	11840000	10001	*	chr1	11890000	11900000	10001	*	FALSE	FALSE	FALSE	TRUE	3.39745	loop_72	70000	15.1667	25	-0.177671	-0.293788	-0.116118	0.680857	FALSE	FALSE	FALSE	16	16	17	20	11	18	14	17	25	15	17	18	9	16	9	14	6	14	14	12	16	20	16	14
chr1	12120000	12130000	10001	*	chr1	12200000	12210000	10001	*	TRUE	TRUE	TRUE	TRUE	10.1339	loop_73	90000	39.8333	69	-0.099326	-0.246855	-0.147529	0.643291	FALSE	FALSE	FALSE	39	45	35	40	37	48	40	41	69	58	47	49	27	24	39	30	40	27	36	41	45	29	30	40
chr1	12310000	12320000	10001	*	chr1	12620000	12630000	10001	*	FALSE	TRUE	TRUE	TRUE	4.14745	loop_74	320000	12.875	24	0.183125	0.272176	0.0890512	0.751278	FALSE	FALSE	FALSE	18	12	14	8	8	9	10	9	24	15	19	16	14	9	5	8	17	10	8	9	21	14	15	17
chr1	12400000	12410000	10001	*	chr1	12620000	12630000	10001	*	TRUE	FALSE	FALSE	TRUE	3.86152	loop_75	230000	11.75	25	-0.0217028	-0.460866	-0.439163	0.47448	FALSE	FALSE	FALSE	18	7	11	14	8	13	8	19	25	12	23	22	8	7	6	8	14	9	9	6	6	5	10	14
chr1	13660000	13670000	10001	*	chr1	13960000	13970000	10001	*	FALSE	TRUE	FALSE	TRUE	4.5562	loop_76	310000	8.16667	17	0.877597	1.10943	0.231833	0.0560711	FALSE	FALSE	FALSE	4	4	2	3	6	6	8	4	10	17	7	9	6	9	8	9	6	13	10	14	8	13	14	6
chr1	13820000	13830000	10001	*	chr1	13950000	13960000	10001	*	TRUE	TRUE	FALSE	TRUE	5.78261	loop_77	140000	12	26	-0.804501	-1.20427	-0.399766	0.000814966	TRUE	TRUE	FALSE	20	26	13	20	18	21	10	11	20	16	8	14	4	7	7	11	8	6	11	4	10	11	6	6
chr1	13960000	13970000	10001	*	chr1	15040000	15050000	10001	*	FALSE	FALSE	FALSE	TRUE	4.7085	loop_78	1090000	4.29167	10	-0.442885	0.0196433	0.462528	0.733441	FALSE	FALSE	FALSE	6	4	5	4	3	3	3	7	8	1	4	9	4	1	2	1	7	3	2	4	10	4	7	1
chr1	14110000	14120000	10001	*	chr1	14540000	14550000	10001	*	FALSE	FALSE	FALSE	TRUE	2.3801	loop_79	440000	5.66667	15	-0.505156	-0.159357	0.345799	0.656917	FALSE	FALSE	FALSE	13	8	7	15	2	2	3	4	5	5	4	7	5	5	5	2	6	6	6	6	2	3	7	8
chr1	14110000	14120000	10001	*	chr1	15040000	15050000	10001	*	FALSE	FALSE	FALSE	TRUE	5.42687	loop_80	940000	5.20833	10	-0.482351	-0.402129	0.0802225	0.657656	FALSE	FALSE	FALSE	10	6	5	8	3	8	1	8	6	6	6	6	4	5	3	2	1	4	9	3	5	6	6	4
chr1	14910000	14920000	10001	*	chr1	15020000	15030000	10001	*	FALSE	TRUE	FALSE	TRUE	3.65164	loop_81	120000	12.125	21	0.0959811	-0.624622	-0.720603	0.12913	FALSE	FALSE	FALSE	13	21	14	17	9	16	4	11	17	16	17	19	16	10	14	9	9	13	7	8	8	10	9	4
chr1	15120000	15130000	10001	*	chr1	15270000	15280000	10001	*	TRUE	TRUE	TRUE	TRUE	6.57221	loop_82	160000	19.1667	37	0.337657	0.277486	-0.0601718	0.571147	FALSE	FALSE	FALSE	16	12	18	11	11	19	25	13	28	23	37	33	13	18	16	10	18	22	21	18	16	15	26	21
chr1	15120000	15130000	10001	*	chr1	15300000	15310000	10001	*	FALSE	FALSE	TRUE	FALSE	7.30185	loop_83	190000	15.1667	25	0.193262	0.456644	0.263382	0.384596	FALSE	FALSE	FALSE	15	15	17	13	10	7	15	8	21	25	22	15	10	13	8	11	20	11	13	19	17	18	18	23
chr1	15130000	15140000	10001	*	chr1	15430000	15440000	10001	*	TRUE	FALSE	TRUE	TRUE	3.76166	loop_84	310000	3.875	10	0.172815	0.991921	0.819105	0.248457	FALSE	FALSE	FALSE	6	2	1	4	4	3	2	0	5	3	2	8	2	1	3	3	3	5	6	5	5	10	4	6
chr1	15320000	15330000	10001	*	chr1	15430000	15440000	10001	*	TRUE	TRUE	TRUE	TRUE	6.82092	loop_85	120000	22.0417	31	-0.281851	-0.100626	0.181224	0.643234	FALSE	FALSE	FALSE	25	20	17	20	15	28	28	28	30	31	29	27	10	14	11	15	18	17	19	22	29	28	21	27
chr1	15590000	15600000	10001	*	chr1	15740000	15750000	10001	*	TRUE	TRUE	TRUE	TRUE	4.25891	loop_86	160000	10.1667	17	0.342714	-0.0344289	-0.377143	0.581024	FALSE	FALSE	FALSE	13	16	5	17	2	6	5	10	15	17	12	12	11	6	13	11	6	7	7	10	10	9	10	14
chr1	15800000	15810000	10001	*	chr1	15920000	15930000	10001	*	TRUE	FALSE	FALSE	TRUE	3.04401	loop_87	130000	10.375	15	-0.338442	-0.216051	0.122391	0.700242	FALSE	FALSE	FALSE	15	11	13	15	6	13	12	6	12	12	15	6	11	7	8	7	6	10	14	11	9	9	14	7
chr1	15810000	15820000	10001	*	chr1	15990000	16000000	10001	*	TRUE	FALSE	TRUE	TRUE	3.56377	loop_88	190000	8.79167	17	-0.245536	-0.0518059	0.19373	0.844896	FALSE	FALSE	FALSE	17	8	8	10	6	10	6	7	8	13	10	10	7	3	12	3	6	12	4	6	12	9	14	10
chr1	16070000	16080000	10001	*	chr1	16360000	16370000	10001	*	TRUE	TRUE	TRUE	TRUE	5.56701	loop_89	300000	5.45833	13	-0.199563	0.181894	0.381457	0.783386	FALSE	FALSE	FALSE	7	3	6	7	6	4	5	3	7	6	7	2	7	4	3	3	5	6	3	5	13	7	5	7
chr1	16080000	16090000	10001	*	chr1	16240000	16250000	10001	*	TRUE	TRUE	TRUE	TRUE	4.78144	loop_90	170000	10.125	17	0.221138	0.299893	0.0787558	0.769197	FALSE	FALSE	FALSE	10	12	10	5	11	8	8	4	10	14	17	17	10	8	5	6	12	6	5	13	12	12	13	15
chr1	16080000	16090000	10001	*	chr1	16130000	16140000	10001	*	TRUE	FALSE	FALSE	TRUE	2.16636	loop_91	60000	10.1667	21	0.182826	-0.330599	-0.513426	0.453771	FALSE	FALSE	FALSE	7	9	10	12	11	8	11	10	20	13	21	12	8	7	7	10	10	6	3	5	11	12	13	8
chr1	16080000	16090000	10001	*	chr1	16180000	16190000	10001	*	TRUE	TRUE	TRUE	TRUE	6.64705	loop_92	110000	16.4583	27	0.0965106	0.0164065	-0.0801041	0.955271	FALSE	FALSE	FALSE	12	13	17	15	15	18	9	22	15	27	20	26	21	15	14	4	17	14	11	13	22	21	15	19
chr1	16500000	16510000	10001	*	chr1	16900000	16910000	10001	*	FALSE	FALSE	TRUE	FALSE	5.61716	loop_93	410000	1.91667	5	1.10166	0.9645	-0.137163	0.494995	FALSE	FALSE	FALSE	3	2	1	1	1	0	0	1	5	1	3	3	1	3	2	2	0	4	2	2	2	1	2	4
chr1	16950000	16960000	10001	*	chr1	17040000	17050000	10001	*	TRUE	TRUE	TRUE	TRUE	8.32522	loop_94	100000	16.2917	38	0.0651653	-0.437248	-0.502414	0.293569	FALSE	FALSE	FALSE	17	14	14	19	14	17	19	18	18	27	38	21	16	14	13	8	9	14	12	11	23	8	12	15
chr1	17120000	17130000	10001	*	chr1	17230000	17240000	10001	*	TRUE	TRUE	TRUE	TRUE	8.9419	loop_95	120000	24.125	37	-0.0150227	-0.491937	-0.476914	0.119404	FALSE	FALSE	FALSE	30	25	25	26	22	31	24	21	33	30	37	26	24	19	20	29	18	20	13	15	33	21	22	15
chr1	17120000	17130000	10001	*	chr1	17330000	17340000	10001	*	TRUE	TRUE	TRUE	TRUE	3.8865	loop_96	220000	13.6667	23	0.102309	-0.189184	-0.291493	0.710867	FALSE	FALSE	FALSE	11	16	23	13	8	15	10	10	23	20	19	15	12	13	10	11	13	6	8	8	15	14	13	22
chr1	17120000	17130000	10001	*	chr1	17410000	17420000	10001	*	FALSE	FALSE	TRUE	FALSE	3.39884	loop_97	300000	6.125	15	-0.181669	0.387062	0.56873	0.585725	FALSE	FALSE	FALSE	5	10	3	4	3	3	9	6	9	6	8	4	7	9	0	0	7	6	6	6	15	7	3	11
chr1	17270000	17280000	10001	*	chr1	17340000	17350000	10001	*	FALSE	FALSE	TRUE	TRUE	2.38985	loop_98	80000	8.41667	13	-0.28086	-0.101893	0.178967	0.830091	FALSE	FALSE	FALSE	6	7	4	11	10	10	11	10	8	7	8	11	11	3	9	5	12	8	7	4	13	12	8	7
chr1	17420000	17430000	10001	*	chr1	17480000	17490000	10001	*	FALSE	FALSE	FALSE	TRUE	3.04057	loop_99	70000	12.0833	19	-0.186202	-0.131378	0.054824	0.892264	FALSE	FALSE	FALSE	13	11	12	5	11	15	17	14	17	8	14	19	14	9	7	7	8	11	9	15	13	17	9	15
chr1	17500000	17510000	10001	*	chr1	17600000	17610000	10001	*	TRUE	TRUE	TRUE	TRUE	8.50048	loop_100	110000	25.875	44	0.119843	-0.531833	-0.651677	0.0337254	FALSE	FALSE	FALSE	27	20	24	25	27	32	27	29	35	44	41	38	30	20	24	21	20	22	16	14	26	16	18	25
chr1	17650000	17660000	10001	*	chr1	18580000	18590000	10001	*	FALSE	FALSE	FALSE	TRUE	4.26802	loop_101	940000	2.5	8	0.142068	0.342478	0.20041	0.919754	FALSE	FALSE	FALSE	3	2	3	2	4	2	0	1	1	8	4	2	3	0	1	2	1	2	2	4	2	3	5	3
chr1	17660000	17670000	10001	*	chr1	17820000	17830000	10001	*	TRUE	TRUE	FALSE	TRUE	3.57368	loop_102	170000	7.91667	17	0.112891	-1.40538	-1.51827	0.00125426	FALSE	TRUE	TRUE	11	14	12	7	7	11	2	10	15	17	10	13	11	7	4	10	5	5	3	1	7	1	3	4
chr1	17660000	17670000	10001	*	chr1	17910000	17920000	10001	*	TRUE	FALSE	FALSE	TRUE	4.94122	loop_103	260000	6.20833	11	-0.485368	-1.32074	-0.835369	0.0367625	FALSE	FALSE	FALSE	9	10	7	10	4	9	11	8	6	8	10	8	5	5	5	6	5	6	2	6	1	0	2	6
chr1	17660000	17670000	10001	*	chr1	18100000	18110000	10001	*	TRUE	TRUE	TRUE	TRUE	3.63671	loop_104	450000	4.54167	9	-0.349414	-0.883652	-0.534238	0.37467	FALSE	FALSE	FALSE	4	6	8	9	5	6	6	1	8	6	3	7	2	4	3	5	1	4	5	0	7	6	2	1
chr1	17920000	17930000	10001	*	chr1	18100000	18110000	10001	*	TRUE	FALSE	TRUE	TRUE	3.07346	loop_105	190000	6.58333	14	0.035753	-0.392858	-0.428611	0.675158	FALSE	FALSE	FALSE	7	7	5	7	3	13	8	4	6	12	10	14	6	5	5	3	5	5	4	5	10	5	5	4
chr1	17920000	17930000	10001	*	chr1	18580000	18590000	10001	*	TRUE	FALSE	TRUE	TRUE	3.7612	loop_106	670000	3.66667	7	-0.394742	-0.133042	0.2617	0.836697	FALSE	FALSE	FALSE	3	5	5	7	1	3	2	6	3	4	5	6	2	3	1	2	3	1	3	4	7	1	5	6
chr1	18300000	18310000	10001	*	chr1	18520000	18530000	10001	*	FALSE	FALSE	TRUE	FALSE	2.66389	loop_107	230000	4.66667	11	0.120494	1.34447	1.22397	0.0176794	FALSE	TRUE	TRUE	4	2	2	3	4	1	3	4	9	7	2	2	5	1	2	1	11	8	5	6	11	8	4	7
chr1	18590000	18600000	10001	*	chr1	18680000	18690000	10001	*	TRUE	TRUE	TRUE	TRUE	4.59506	loop_108	100000	14.8333	25	0.0798322	0.169958	0.0901253	0.883202	FALSE	FALSE	FALSE	12	15	19	10	12	12	11	15	25	9	15	18	12	12	16	14	13	14	11	14	19	19	18	21
chr1	18590000	18600000	10001	*	chr1	18820000	18830000	10001	*	TRUE	TRUE	TRUE	TRUE	6.23771	loop_109	240000	13.2083	19	-0.114388	0.186733	0.301121	0.721706	FALSE	FALSE	FALSE	14	11	12	14	12	18	7	12	12	17	13	15	10	10	10	13	17	14	17	14	13	9	14	19
chr1	18680000	18690000	10001	*	chr1	18820000	18830000	10001	*	FALSE	FALSE	TRUE	TRUE	2.51138	loop_110	150000	6.75	14	0.523648	0.512503	-0.0111451	0.528287	FALSE	FALSE	FALSE	3	6	9	5	5	7	3	2	14	7	12	9	3	4	7	7	8	4	4	9	9	12	4	9
chr1	18900000	18910000	10001	*	chr1	18960000	18970000	10001	*	TRUE	TRUE	TRUE	FALSE	2.80596	loop_111	70000	12.125	22	-0.508573	-0.598799	-0.0902266	0.261167	FALSE	FALSE	FALSE	14	8	18	22	10	16	16	12	22	12	13	7	13	7	14	3	11	11	6	2	7	17	15	15
chr1	18910000	18920000	10001	*	chr1	19070000	19080000	10001	*	TRUE	TRUE	TRUE	TRUE	4.80049	loop_112	170000	9.95833	16	-0.0494166	-0.374225	-0.324809	0.643138	FALSE	FALSE	FALSE	9	12	5	14	11	11	11	10	13	16	9	11	9	13	11	5	10	7	3	11	12	7	12	7
chr1	18950000	18960000	10001	*	chr1	19060000	19070000	10001	*	FALSE	FALSE	TRUE	FALSE	2.33163	loop_113	120000	7.5	12	-0.593069	-0.326478	0.266591	0.435939	FALSE	FALSE	FALSE	8	5	12	6	10	7	9	12	6	6	4	7	9	6	6	5	7	6	6	5	8	11	10	9
chr1	19120000	19130000	10001	*	chr1	19170000	19180000	10001	*	TRUE	FALSE	FALSE	TRUE	2.09894	loop_114	60000	15	26	-0.230224	-0.33363	-0.103406	0.613163	FALSE	FALSE	FALSE	14	19	18	22	12	13	9	22	26	12	26	16	9	12	10	8	5	7	9	11	18	23	19	20
chr1	19350000	19360000	10001	*	chr1	19650000	19660000	10001	*	FALSE	FALSE	TRUE	TRUE	3.79388	loop_115	310000	6	11	0.101078	0.103244	0.00216676	0.976921	FALSE	FALSE	FALSE	7	3	2	11	5	6	6	4	3	5	11	7	6	7	4	7	5	8	4	6	8	8	5	6
chr1	19390000	19400000	10001	*	chr1	19480000	19490000	10001	*	FALSE	FALSE	FALSE	TRUE	2.47957	loop_116	100000	7.95833	15	-0.266471	-0.521131	-0.25466	0.52433	FALSE	FALSE	FALSE	9	5	10	8	10	8	10	11	15	9	10	14	4	4	4	6	6	6	4	5	10	6	7	10
chr1	19390000	19400000	10001	*	chr1	19580000	19590000	10001	*	TRUE	TRUE	TRUE	TRUE	3.37171	loop_117	200000	9.79167	21	0.495749	0.168052	-0.327697	0.497578	FALSE	FALSE	FALSE	15	6	11	9	8	3	5	7	6	17	21	19	7	3	11	14	7	7	6	11	10	12	8	12
chr1	19390000	19400000	10001	*	chr1	19650000	19660000	10001	*	TRUE	TRUE	FALSE	TRUE	4.41443	loop_118	270000	8.25	14	-0.191696	-0.529151	-0.337455	0.508864	FALSE	FALSE	FALSE	12	8	10	14	8	8	6	8	8	10	14	8	8	12	7	3	8	3	5	7	5	10	10	6
chr1	19480000	19490000	10001	*	chr1	19640000	19650000	10001	*	FALSE	TRUE	FALSE	TRUE	2.61934	loop_119	170000	6.25	12	-0.147478	-0.674153	-0.526675	0.408648	FALSE	FALSE	FALSE	4	4	9	8	8	6	5	12	9	8	3	6	7	6	7	8	4	4	5	2	7	8	6	4
chr1	19760000	19770000	10001	*	chr1	19870000	19880000	10001	*	FALSE	FALSE	TRUE	FALSE	4.71709	loop_120	120000	7.16667	16	0.0464665	0.817225	0.770759	0.121366	FALSE	FALSE	FALSE	9	5	5	6	5	3	5	5	11	6	5	8	3	6	7	2	11	2	7	11	16	12	8	14
chr1	19910000	19920000	10001	*	chr1	20480000	20490000	10001	*	FALSE	FALSE	TRUE	TRUE	3.57011	loop_121	580000	3.95833	7	-0.10368	-0.170587	-0.0669064	0.967414	FALSE	FALSE	FALSE	1	6	4	5	4	4	4	4	5	7	4	5	0	5	0	7	4	4	1	4	7	2	4	4
chr1	19910000	19920000	10001	*	chr1	20100000	20110000	10001	*	FALSE	FALSE	TRUE	TRUE	3.20031	loop_122	200000	7.08333	13	0.0222845	0.723012	0.700727	0.207689	FALSE	FALSE	FALSE	11	5	7	6	6	3	2	5	10	8	7	11	5	3	5	1	3	9	6	10	13	8	13	13
chr1	19910000	19920000	10001	*	chr1	20150000	20160000	10001	*	TRUE	TRUE	TRUE	TRUE	4.59998	loop_123	250000	11.0417	19	0.0133854	0.108729	0.0953435	0.95437	FALSE	FALSE	FALSE	10	14	12	10	8	11	7	10	19	14	10	17	9	8	3	11	10	6	11	13	11	14	10	17
chr1	19970000	19980000	10001	*	chr1	20150000	20160000	10001	*	TRUE	TRUE	FALSE	TRUE	3.26119	loop_124	190000	10.375	22	-0.558716	-1.30187	-0.743157	0.00238822	FALSE	TRUE	TRUE	14	18	22	20	10	8	9	14	15	11	16	16	5	9	8	5	4	4	6	1	17	5	5	7
chr1	20100000	20110000	10001	*	chr1	20150000	20160000	10001	*	TRUE	TRUE	TRUE	TRUE	2.91589	loop_125	60000	14.4583	29	-0.328199	0.195065	0.523264	0.304348	FALSE	FALSE	FALSE	11	19	26	11	13	17	6	9	14	18	14	13	10	8	10	9	14	9	11	10	25	18	29	23
chr1	20210000	20220000	10001	*	chr1	20420000	20430000	10001	*	FALSE	FALSE	TRUE	TRUE	2.60853	loop_126	220000	7.875	15	0.112144	0.244727	0.132583	0.877067	FALSE	FALSE	FALSE	6	15	6	14	6	4	2	4	13	8	14	7	4	9	6	4	6	6	8	5	9	15	8	10
chr1	20210000	20220000	10001	*	chr1	20490000	20500000	10001	*	TRUE	TRUE	TRUE	TRUE	5.03717	loop_127	290000	9.29167	19	-0.0798381	0.383882	0.46372	0.492631	FALSE	FALSE	FALSE	11	9	8	11	6	8	5	7	16	12	9	5	5	3	11	6	9	8	8	7	19	19	8	13
chr1	20210000	20220000	10001	*	chr1	20640000	20650000	10001	*	FALSE	FALSE	TRUE	FALSE	2.80305	loop_128	440000	1.54167	5	-0.680771	1.29492	1.97569	0.130905	FALSE	FALSE	FALSE	3	1	2	0	1	1	1	0	2	1	0	1	1	0	1	0	2	2	3	1	5	2	2	5
chr1	20220000	20230000	10001	*	chr1	20350000	20360000	10001	*	FALSE	TRUE	TRUE	TRUE	2.90854	loop_129	140000	8.95833	19	0.221985	0.366434	0.144448	0.705043	FALSE	FALSE	FALSE	9	9	10	7	5	6	8	5	15	8	12	17	10	5	6	3	8	7	8	7	19	9	12	10
chr1	20360000	20370000	10001	*	chr1	20490000	20500000	10001	*	TRUE	TRUE	TRUE	TRUE	4.55686	loop_130	140000	9	17	-0.43208	-0.667773	-0.235693	0.27709	FALSE	FALSE	FALSE	9	13	11	12	10	12	7	12	11	10	5	6	10	9	12	5	2	5	8	6	10	4	10	17
chr1	20520000	20530000	10001	*	chr1	20560000	20570000	10001	*	FALSE	TRUE	FALSE	FALSE	2.2487	loop_131	50000	12.4583	27	0.145858	-0.446024	-0.591882	0.252081	FALSE	FALSE	FALSE	9	17	11	13	12	12	12	13	8	18	17	27	14	12	12	10	5	7	4	9	17	14	13	13
chr1	20520000	20530000	10001	*	chr1	20640000	20650000	10001	*	TRUE	TRUE	TRUE	TRUE	8.21476	loop_132	130000	14.3333	33	0.405367	-0.139855	-0.545223	0.249502	FALSE	FALSE	FALSE	14	9	18	14	6	13	13	13	33	17	26	17	10	18	11	13	8	10	11	5	25	16	13	11
chr1	20570000	20580000	10001	*	chr1	20630000	20640000	10001	*	TRUE	TRUE	TRUE	TRUE	3.33983	loop_133	70000	23.7083	40	0.160772	-0.540934	-0.701706	0.0124784	FALSE	FALSE	TRUE	27	29	28	31	20	24	11	24	33	31	40	36	26	24	22	21	13	15	13	13	23	14	26	25
chr1	20690000	20700000	10001	*	chr1	20730000	20740000	10001	*	TRUE	FALSE	FALSE	TRUE	2.63358	loop_134	50000	10.0833	20	0.285611	-0.300681	-0.586292	0.361746	FALSE	FALSE	FALSE	4	10	6	12	12	5	13	12	14	11	15	11	8	10	11	16	4	3	9	4	20	6	10	16
chr1	20690000	20700000	10001	*	chr1	21190000	21200000	10001	*	TRUE	TRUE	TRUE	TRUE	7.42529	loop_135	510000	7.125	13	-0.454917	-0.189006	0.265911	0.636131	FALSE	FALSE	FALSE	11	7	8	6	5	12	5	8	6	8	9	5	4	3	7	7	6	4	6	6	8	8	13	9
chr1	20780000	20790000	10001	*	chr1	21190000	21200000	10001	*	FALSE	FALSE	FALSE	TRUE	3.61564	loop_136	420000	4	9	0.0206254	0.879142	0.858516	0.256958	FALSE	FALSE	FALSE	5	8	1	1	2	2	3	2	3	3	6	4	3	2	3	2	5	3	6	3	9	8	5	7
chr1	20980000	20990000	10001	*	chr1	21190000	21200000	10001	*	TRUE	TRUE	TRUE	TRUE	4.41749	loop_137	220000	7.45833	14	-0.118298	-0.461399	-0.343101	0.638975	FALSE	FALSE	FALSE	12	14	6	10	2	3	8	10	13	7	13	8	8	5	4	6	2	4	3	9	11	5	4	12
chr1	21210000	21220000	10001	*	chr1	21530000	21540000	10001	*	FALSE	FALSE	TRUE	FALSE	4.06565	loop_138	330000	2.54167	9	0.916378	1.97877	1.06239	0.051944	FALSE	FALSE	FALSE	0	2	0	0	3	0	2	1	3	3	3	4	3	0	1	0	4	2	2	3	6	3	9	7
chr1	21220000	21230000	10001	*	chr1	21490000	21500000	10001	*	FALSE	TRUE	FALSE	TRUE	4.0059	loop_139	280000	3.91667	8	0.347719	-0.07261	-0.420329	0.778721	FALSE	FALSE	FALSE	2	5	5	5	2	3	4	2	8	5	7	7	3	4	2	3	2	3	4	3	6	3	0	6
chr1	21230000	21240000	10001	*	chr1	21360000	21370000	10001	*	TRUE	TRUE	TRUE	TRUE	9.79664	loop_140	140000	14.3333	26	0.0679657	-0.202594	-0.27056	0.722739	FALSE	FALSE	FALSE	15	13	19	10	13	14	12	14	26	12	21	14	14	9	12	17	6	10	7	9	24	17	18	18
chr1	21240000	21250000	10001	*	chr1	21660000	21670000	10001	*	FALSE	FALSE	TRUE	FALSE	3.18659	loop_141	430000	2.5	5	0.143685	0.288923	0.145239	0.937503	FALSE	FALSE	FALSE	2	4	2	1	2	2	3	1	3	3	3	4	2	1	2	2	0	3	3	1	3	5	5	3
chr1	21250000	21260000	10001	*	chr1	21330000	21340000	10001	*	TRUE	FALSE	FALSE	FALSE	5.07037	loop_142	90000	10.5833	18	-0.370013	-0.609286	-0.239273	0.286825	FALSE	FALSE	FALSE	18	10	12	10	14	14	5	16	13	12	13	16	4	8	9	8	7	6	6	4	12	10	13	14
chr1	21370000	21380000	10001	*	chr1	21650000	21660000	10001	*	FALSE	TRUE	TRUE	TRUE	4.93896	loop_143	290000	5.04167	14	0.353869	0.778524	0.424655	0.434493	FALSE	FALSE	FALSE	4	5	3	3	0	5	5	3	4	8	6	3	5	8	5	0	5	1	5	5	14	4	10	10
chr1	21600000	21610000	10001	*	chr1	21650000	21660000	10001	*	FALSE	FALSE	TRUE	FALSE	2.18198	loop_144	60000	7.20833	15	0.201248	0.0849454	-0.116302	0.922808	FALSE	FALSE	FALSE	10	6	2	8	2	10	4	10	8	14	7	6	9	7	8	4	10	7	5	5	7	6	3	15
chr1	21700000	21710000	10001	*	chr1	21970000	21980000	10001	*	TRUE	TRUE	TRUE	TRUE	4.57401	loop_145	280000	2.70833	8	0.423891	0.590022	0.166132	0.76928	FALSE	FALSE	FALSE	2	3	1	1	1	5	1	2	2	8	5	3	0	4	1	1	2	2	1	2	6	3	6	3
chr1	21710000	21720000	10001	*	chr1	22410000	22420000	10001	*	FALSE	FALSE	TRUE	FALSE	3.14714	loop_146	710000	1.29167	5	0.539443	1.80106	1.26162	0.265601	FALSE	FALSE	FALSE	2	1	2	0	0	0	0	0	4	3	0	0	0	2	0	0	3	1	1	1	5	2	1	3
chr1	21760000	21770000	10001	*	chr1	21960000	21970000	10001	*	FALSE	FALSE	TRUE	TRUE	2.42871	loop_147	210000	4.58333	12	-0.429645	0.466721	0.896367	0.308914	FALSE	FALSE	FALSE	6	4	2	5	1	4	4	7	3	2	4	5	2	4	2	4	4	5	5	2	7	8	8	12
chr1	21860000	21870000	10001	*	chr1	21960000	21970000	10001	*	FALSE	FALSE	FALSE	TRUE	2.28445	loop_148	110000	5.54167	9	-0.3985	-0.131012	0.267489	0.760582	FALSE	FALSE	FALSE	7	5	4	9	7	6	6	3	6	5	7	5	6	2	4	4	4	2	8	5	8	4	8	8
chr1	22130000	22140000	10001	*	chr1	22270000	22280000	10001	*	TRUE	FALSE	TRUE	TRUE	2.62292	loop_149	150000	6.29167	11	-0.0609852	0.0240178	0.085003	0.985502	FALSE	FALSE	FALSE	5	7	8	2	4	10	5	7	7	9	9	8	7	2	5	3	4	5	6	5	4	8	10	11
chr1	22130000	22140000	10001	*	chr1	22410000	22420000	10001	*	TRUE	TRUE	TRUE	TRUE	4.78615	loop_150	290000	8.08333	17	-0.123611	0.532418	0.656029	0.330956	FALSE	FALSE	FALSE	8	11	0	6	5	9	10	5	9	4	12	10	3	3	5	8	8	9	3	10	13	13	17	13
chr1	22130000	22140000	10001	*	chr1	22640000	22650000	10001	*	FALSE	FALSE	TRUE	TRUE	3.77603	loop_151	520000	3.08333	9	-1.0671	0.058939	1.12604	0.310107	FALSE	FALSE	FALSE	2	4	2	5	5	3	1	5	2	1	3	5	2	0	0	1	0	1	4	2	3	9	9	5
chr1	22170000	22180000	10001	*	chr1	22620000	22630000	10001	*	FALSE	TRUE	FALSE	FALSE	3.08357	loop_152	460000	2.54167	6	0.147417	-0.642705	-0.790122	0.628937	FALSE	FALSE	FALSE	1	2	1	3	4	6	4	0	4	3	3	4	0	3	3	5	1	2	0	4	2	3	2	1
chr1	22420000	22430000	10001	*	chr1	22640000	22650000	10001	*	TRUE	TRUE	TRUE	TRUE	7.86217	loop_153	230000	11.75	19	-0.293229	-0.367127	-0.0738988	0.597085	FALSE	FALSE	FALSE	19	16	5	13	6	19	14	11	12	12	10	12	10	9	12	12	3	11	5	11	13	13	15	19
chr1	22420000	22430000	10001	*	chr1	22930000	22940000	10001	*	FALSE	FALSE	FALSE	TRUE	4.18144	loop_154	520000	2.45833	6	-0.0363545	0.311372	0.347726	0.889626	FALSE	FALSE	FALSE	1	3	4	2	2	2	2	1	2	4	3	1	2	3	2	1	2	1	1	2	6	4	4	4
chr1	22670000	22680000	10001	*	chr1	22930000	22940000	10001	*	TRUE	TRUE	TRUE	TRUE	6.81961	loop_155	270000	9.91667	17	0.0136473	-0.195776	-0.209424	0.852163	FALSE	FALSE	FALSE	9	11	9	13	8	5	12	11	17	14	12	14	6	10	8	5	10	5	4	6	12	12	12	13
chr1	22700000	22710000	10001	*	chr1	22880000	22890000	10001	*	TRUE	TRUE	TRUE	TRUE	3.24715	loop_156	190000	11.5417	25	-0.212388	-0.121888	0.0905006	0.856745	FALSE	FALSE	FALSE	14	10	12	17	10	11	8	11	18	14	15	8	10	10	8	5	5	6	8	9	25	12	22	9
chr1	22970000	22980000	10001	*	chr1	23020000	23030000	10001	*	FALSE	FALSE	FALSE	TRUE	2.28834	loop_157	60000	8.66667	20	0.629335	0.459831	-0.169504	0.350476	FALSE	FALSE	FALSE	6	7	3	6	3	7	7	10	20	11	9	10	6	9	9	8	5	6	7	5	18	16	10	10
chr1	22970000	22980000	10001	*	chr1	23070000	23080000	10001	*	TRUE	TRUE	FALSE	TRUE	5.36157	loop_158	110000	10.0833	24	-0.00948463	0.00688748	0.0163721	0.999099	FALSE	FALSE	FALSE	11	8	15	6	11	10	5	9	24	9	11	10	11	8	6	4	8	5	5	7	15	18	9	17
chr1	22970000	22980000	10001	*	chr1	23180000	23190000	10001	*	TRUE	TRUE	TRUE	TRUE	6.21718	loop_159	220000	7.875	15	-0.262553	-0.506189	-0.243636	0.555787	FALSE	FALSE	FALSE	6	15	12	11	10	9	3	6	10	12	14	9	4	2	8	7	5	7	7	5	9	6	7	5
chr1	22970000	22980000	10001	*	chr1	23280000	23290000	10001	*	TRUE	TRUE	TRUE	TRUE	5.60777	loop_160	320000	4.25	11	0.310651	0.164199	-0.146451	0.888471	FALSE	FALSE	FALSE	4	5	7	5	4	0	2	2	11	6	2	4	8	5	1	3	7	3	3	2	4	5	3	6
chr1	23090000	23100000	10001	*	chr1	23180000	23190000	10001	*	TRUE	TRUE	TRUE	TRUE	5.80303	loop_161	100000	17.9167	30	0.00389708	-0.394611	-0.398508	0.357524	FALSE	FALSE	FALSE	21	15	24	17	14	13	20	23	29	21	24	30	17	9	14	17	11	11	16	4	25	21	16	18
chr1	23090000	23100000	10001	*	chr1	23270000	23280000	10001	*	TRUE	TRUE	TRUE	TRUE	3.62855	loop_162	190000	6.54167	15	0.0614456	0.242366	0.18092	0.887836	FALSE	FALSE	FALSE	8	5	5	5	5	4	5	8	11	13	9	7	4	1	4	3	4	2	5	4	15	9	6	15
chr1	23210000	23220000	10001	*	chr1	23270000	23280000	10001	*	TRUE	TRUE	FALSE	TRUE	2.9997	loop_163	70000	11.625	22	0.0846812	-0.0106327	-0.0953139	0.962711	FALSE	FALSE	FALSE	9	11	13	13	13	7	11	9	22	18	18	16	6	7	9	6	9	8	12	3	15	16	11	17
chr1	23330000	23340000	10001	*	chr1	23530000	23540000	10001	*	FALSE	FALSE	FALSE	TRUE	2.35985	loop_164	210000	3.41667	9	0.151196	0.422872	0.271677	0.837335	FALSE	FALSE	FALSE	5	3	5	5	1	2	0	2	1	5	2	6	4	6	2	1	4	3	3	1	4	9	4	4
chr1	23340000	23350000	10001	*	chr1	23400000	23410000	10001	*	FALSE	FALSE	FALSE	TRUE	2.55377	loop_165	70000	11.75	23	0.574979	0.340542	-0.234437	0.316412	FALSE	FALSE	FALSE	7	8	9	10	5	11	9	11	23	14	15	22	13	8	13	6	9	10	9	4	18	20	12	16
chr1	23490000	23500000	10001	*	chr1	23530000	23540000	10001	*	TRUE	FALSE	FALSE	TRUE	2.91159	loop_166	50000	14.125	27	0.408239	-0.350558	-0.758797	0.0659732	FALSE	FALSE	FALSE	17	14	16	11	9	11	11	14	25	21	17	27	10	8	21	19	5	10	7	8	14	17	11	16
chr1	23540000	23550000	10001	*	chr1	23630000	23640000	10001	*	TRUE	TRUE	TRUE	TRUE	7.60288	loop_167	100000	23.25	36	-0.0220687	-0.0786142	-0.0565455	0.958408	FALSE	FALSE	FALSE	28	25	20	20	13	28	23	22	33	36	29	25	26	16	19	9	19	12	16	16	34	36	21	32
chr1	23770000	23780000	10001	*	chr1	23850000	23860000	10001	*	FALSE	FALSE	TRUE	FALSE	3.12523	loop_168	90000	5.33333	14	0.0502907	0.690653	0.640363	0.384983	FALSE	FALSE	FALSE	4	7	3	10	0	4	3	2	6	2	4	7	5	4	4	4	5	2	7	2	11	6	12	14
chr1	23770000	23780000	10001	*	chr1	23910000	23920000	10001	*	FALSE	TRUE	TRUE	TRUE	4.20121	loop_169	150000	8.08333	16	0.180011	-0.233418	-0.413429	0.668964	FALSE	FALSE	FALSE	10	5	7	6	10	7	6	10	6	15	9	12	9	6	7	10	7	3	5	7	9	4	8	16
chr1	23800000	23810000	10001	*	chr1	23910000	23920000	10001	*	TRUE	TRUE	FALSE	TRUE	4.07245	loop_170	120000	8.45833	14	-0.501666	-0.579292	-0.0776256	0.336431	FALSE	FALSE	FALSE	13	13	9	14	8	7	7	10	11	2	12	9	12	6	6	4	7	6	2	5	14	8	9	9
chr1	23810000	23820000	10001	*	chr1	24030000	24040000	10001	*	FALSE	TRUE	FALSE	TRUE	2.89005	loop_171	230000	2.33333	6	1.28023	0.907693	-0.372541	0.360882	FALSE	FALSE	FALSE	1	2	3	1	0	1	1	1	3	6	6	5	3	0	2	1	0	0	3	1	1	5	4	6
chr1	23970000	23980000	10001	*	chr1	24020000	24030000	10001	*	TRUE	TRUE	TRUE	TRUE	3.01321	loop_172	60000	14.125	25	0.237527	-0.312999	-0.550526	0.273708	FALSE	FALSE	FALSE	18	19	21	14	11	12	8	6	20	17	17	25	20	12	13	13	8	7	11	7	16	14	9	21
chr1	24070000	24080000	10001	*	chr1	24110000	24120000	10001	*	TRUE	TRUE	FALSE	TRUE	2.5824	loop_173	50000	11.8333	24	0.0582694	-0.853139	-0.911408	0.0242016	FALSE	TRUE	TRUE	16	11	24	8	8	11	13	13	23	16	15	20	11	10	11	11	8	3	5	3	9	11	10	14
chr1	24070000	24080000	10001	*	chr1	24390000	24400000	10001	*	FALSE	TRUE	FALSE	TRUE	4.03007	loop_174	330000	4.45833	11	0.615629	0.148314	-0.467314	0.573007	FALSE	FALSE	FALSE	8	3	6	2	2	1	1	5	8	8	7	9	5	2	5	2	4	1	3	1	11	6	3	4
chr1	24190000	24200000	10001	*	chr1	24390000	24400000	10001	*	TRUE	TRUE	TRUE	TRUE	12.2512	loop_175	210000	14.5	29	-0.148112	0.164403	0.312514	0.662117	FALSE	FALSE	FALSE	19	14	14	21	8	13	8	12	16	19	10	18	12	10	12	8	11	3	12	13	19	23	24	29
chr1	24190000	24200000	10001	*	chr1	24630000	24640000	10001	*	FALSE	TRUE	FALSE	TRUE	5.96742	loop_176	450000	2.95833	8	0.61098	0.292806	-0.318174	0.732999	FALSE	FALSE	FALSE	1	4	2	1	1	5	2	2	6	5	0	8	3	3	2	3	2	2	4	2	4	1	4	4
chr1	24200000	24210000	10001	*	chr1	24310000	24320000	10001	*	TRUE	TRUE	TRUE	TRUE	3.02322	loop_177	120000	9.70833	19	-0.297664	-0.461589	-0.163925	0.530965	FALSE	FALSE	FALSE	19	11	7	7	6	13	11	12	16	8	11	8	12	5	8	8	8	7	4	3	12	9	14	14
chr1	24310000	24320000	10001	*	chr1	24380000	24390000	10001	*	TRUE	FALSE	TRUE	TRUE	3.18512	loop_178	80000	11.5417	21	-0.124838	-0.0649553	0.0598823	0.94991	FALSE	FALSE	FALSE	21	8	16	11	7	15	8	6	19	15	16	17	9	3	8	6	10	5	9	6	13	15	19	15
chr1	24410000	24420000	10001	*	chr1	24520000	24530000	10001	*	FALSE	FALSE	TRUE	FALSE	3.34523	loop_179	120000	5.83333	13	0.244585	1.05719	0.812605	0.0922249	FALSE	FALSE	FALSE	6	2	4	11	2	1	4	2	7	6	8	4	5	5	2	3	3	5	9	7	9	13	12	10
chr1	24410000	24420000	10001	*	chr1	24630000	24640000	10001	*	FALSE	FALSE	TRUE	TRUE	4.65798	loop_180	230000	4.08333	12	0.0990767	0.245566	0.146489	0.930019	FALSE	FALSE	FALSE	6	1	3	6	5	2	1	4	6	4	4	4	3	3	5	3	4	0	5	2	6	5	12	4
chr1	24430000	24440000	10001	*	chr1	24580000	24590000	10001	*	TRUE	FALSE	FALSE	FALSE	2.46659	loop_181	160000	4.91667	9	-0.169618	-0.467504	-0.297887	0.743483	FALSE	FALSE	FALSE	3	6	7	8	4	6	1	8	9	3	7	7	5	2	5	3	0	4	3	3	8	8	5	3
chr1	24680000	24690000	10001	*	chr1	24830000	24840000	10001	*	TRUE	TRUE	TRUE	TRUE	8.94495	loop_182	160000	11.5417	26	-0.0696982	0.135734	0.205432	0.867168	FALSE	FALSE	FALSE	23	13	14	10	7	7	4	9	13	16	9	17	8	6	7	12	8	8	8	5	26	14	15	18
chr1	24680000	24690000	10001	*	chr1	25050000	25060000	10001	*	FALSE	FALSE	TRUE	FALSE	2.71667	loop_183	380000	1.375	6	0.894242	1.74962	0.855381	0.329822	FALSE	FALSE	FALSE	0	0	1	0	1	1	2	0	2	1	2	0	0	1	3	1	3	0	2	1	1	3	2	6
chr1	24690000	24700000	10001	*	chr1	25100000	25110000	10001	*	FALSE	FALSE	FALSE	TRUE	2.99218	loop_184	420000	2.125	7	0.472555	0.514678	0.0421233	0.839807	FALSE	FALSE	FALSE	1	1	2	0	3	0	4	1	5	3	0	3	2	2	1	1	1	1	1	0	5	5	7	2
chr1	24740000	24750000	10001	*	chr1	24830000	24840000	10001	*	TRUE	FALSE	TRUE	TRUE	2.57185	loop_185	100000	5	12	0.04518	-0.142718	-0.187898	0.94875	FALSE	FALSE	FALSE	9	5	6	5	1	2	6	5	12	11	3	7	3	4	2	3	4	1	6	3	9	5	2	6
chr1	24840000	24850000	10001	*	chr1	25100000	25110000	10001	*	FALSE	FALSE	TRUE	TRUE	5.40799	loop_186	270000	6.45833	16	0.549403	1.12842	0.579019	0.076871	FALSE	FALSE	FALSE	1	8	3	6	2	3	4	4	9	4	11	9	5	3	5	4	10	4	5	5	16	10	14	10
chr1	24840000	24850000	10001	*	chr1	25200000	25210000	10001	*	FALSE	TRUE	TRUE	FALSE	4.69845	loop_187	370000	4.95833	13	0.541174	0.859264	0.31809	0.343792	FALSE	FALSE	FALSE	6	3	3	1	2	4	4	3	7	6	6	10	1	4	3	5	6	4	5	4	7	4	8	13
chr1	24890000	24900000	10001	*	chr1	25030000	25040000	10001	*	FALSE	FALSE	TRUE	FALSE	2.50873	loop_188	150000	5.125	15	0.511058	0.570764	0.0597059	0.589093	FALSE	FALSE	FALSE	5	3	2	4	4	4	4	3	9	12	3	4	4	4	6	3	5	4	2	3	6	5	9	15
chr1	24930000	24940000	10001	*	chr1	25030000	25040000	10001	*	TRUE	TRUE	FALSE	TRUE	3.01291	loop_189	110000	9.16667	23	-0.0489414	-1.52743	-1.47849	0.000285134	FALSE	TRUE	TRUE	11	10	11	18	8	11	14	7	17	23	13	15	9	7	8	4	2	0	3	4	7	3	6	9
chr1	24930000	24940000	10001	*	chr1	25100000	25110000	10001	*	TRUE	TRUE	FALSE	TRUE	3.06826	loop_190	180000	7.33333	14	-0.663667	-1.48179	-0.818121	0.00229642	TRUE	TRUE	TRUE	13	12	14	10	12	10	8	6	9	12	3	9	6	7	7	5	3	4	4	2	7	5	4	4
chr1	25110000	25120000	10001	*	chr1	25200000	25210000	10001	*	TRUE	TRUE	TRUE	FALSE	4.44894	loop_191	100000	8.54167	23	0.449114	1.66523	1.21612	1.86993e-05	FALSE	TRUE	TRUE	2	5	3	3	3	6	4	8	7	17	7	6	4	4	3	3	9	11	6	10	23	22	18	21
chr1	25250000	25260000	10001	*	chr1	25800000	25810000	10001	*	TRUE	FALSE	TRUE	FALSE	8.34291	loop_192	560000	2.29167	5	-0.145082	-0.0893038	0.0557779	0.985316	FALSE	FALSE	FALSE	3	1	1	4	1	2	4	2	5	2	3	1	3	2	2	0	3	0	0	3	2	4	4	3
chr1	25400000	25410000	10001	*	chr1	25520000	25530000	10001	*	FALSE	TRUE	FALSE	TRUE	4.39156	loop_193	130000	2.95833	8	-0.339487	-0.472741	-0.133254	0.822227	FALSE	FALSE	FALSE	5	4	7	5	4	0	3	0	3	8	3	3	4	1	0	2	0	4	2	2	3	3	3	2
chr1	25400000	25410000	10001	*	chr1	25800000	25810000	10001	*	TRUE	FALSE	FALSE	TRUE	6.21466	loop_194	410000	1.41667	4	-0.702786	-0.252329	0.450457	0.815043	FALSE	FALSE	FALSE	3	2	2	0	3	1	1	1	2	1	3	0	1	1	1	0	1	0	1	1	0	2	4	3
chr1	25440000	25450000	10001	*	chr1	25470000	25480000	10001	*	FALSE	FALSE	TRUE	FALSE	1.92802	loop_195	40000	11.8333	23	-0.0373398	0.466135	0.503474	0.385426	FALSE	FALSE	FALSE	16	16	12	12	6	15	0	5	15	14	12	15	9	5	10	4	3	18	7	6	19	20	23	22
chr1	25520000	25530000	10001	*	chr1	25800000	25810000	10001	*	FALSE	FALSE	TRUE	TRUE	3.41937	loop_196	290000	3.45833	10	0.298727	-0.0608585	-0.359586	0.869733	FALSE	FALSE	FALSE	2	5	0	4	2	2	7	2	3	10	4	5	1	2	3	5	2	1	0	7	1	3	6	6
chr1	25610000	25620000	10001	*	chr1	25790000	25800000	10001	*	TRUE	TRUE	FALSE	TRUE	4.45491	loop_197	190000	7.83333	15	0.0868798	-0.332549	-0.419429	0.659106	FALSE	FALSE	FALSE	8	7	10	10	6	7	8	6	15	9	10	14	1	5	7	11	5	4	5	2	14	9	5	10
chr1	25830000	25840000	10001	*	chr1	25880000	25890000	10001	*	TRUE	FALSE	FALSE	TRUE	2.59174	loop_198	60000	8.66667	17	-0.173976	-0.0568082	0.117168	0.924236	FALSE	FALSE	FALSE	12	7	13	15	6	5	5	8	10	9	3	14	10	5	10	5	6	3	11	9	8	10	7	17
chr1	25830000	25840000	10001	*	chr1	25990000	26000000	10001	*	TRUE	TRUE	TRUE	TRUE	4.54395	loop_199	170000	8.375	14	-0.277747	-0.202049	0.0756982	0.811144	FALSE	FALSE	FALSE	7	14	9	11	7	5	9	9	12	4	14	12	8	5	5	4	3	5	7	8	11	12	11	9
chr1	25890000	25900000	10001	*	chr1	25990000	26000000	10001	*	TRUE	TRUE	TRUE	TRUE	4.43925	loop_200	110000	12.5833	22	-0.22089	-0.4749	-0.25401	0.44004	FALSE	FALSE	FALSE	22	22	13	17	16	10	9	5	15	20	21	15	13	6	8	8	12	8	9	7	12	8	12	14
chr1	26030000	26040000	10001	*	chr1	26090000	26100000	10001	*	TRUE	FALSE	FALSE	FALSE	2.69139	loop_201	70000	7.70833	11	-0.455421	-0.0566297	0.398792	0.574706	FALSE	FALSE	FALSE	11	8	4	11	7	9	6	10	7	9	6	9	3	6	7	5	6	10	5	9	5	11	11	10
chr1	26030000	26040000	10001	*	chr1	26150000	26160000	10001	*	TRUE	TRUE	FALSE	TRUE	4.1918	loop_202	130000	7.75	13	-0.0498035	-0.779634	-0.72983	0.174436	FALSE	FALSE	FALSE	9	10	10	10	6	10	9	5	13	9	12	9	8	7	6	8	5	3	2	3	9	7	12	4
chr1	26100000	26110000	10001	*	chr1	26140000	26150000	10001	*	TRUE	TRUE	TRUE	TRUE	3.02657	loop_203	50000	21.7083	47	-0.417563	0.175651	0.593214	0.0895439	FALSE	FALSE	FALSE	29	27	25	22	19	18	17	15	27	16	20	29	6	17	14	11	19	21	11	20	36	30	25	47
chr1	26100000	26110000	10001	*	chr1	26230000	26240000	10001	*	FALSE	FALSE	TRUE	TRUE	2.52505	loop_204	140000	4.91667	10	-0.149263	0.201416	0.350679	0.840338	FALSE	FALSE	FALSE	8	6	2	7	4	3	2	5	3	3	6	9	3	5	3	3	4	1	1	8	10	10	7	5
chr1	26170000	26180000	10001	*	chr1	26320000	26330000	10001	*	FALSE	TRUE	FALSE	FALSE	3.58587	loop_205	160000	3.75	10	1.34077	0.722327	-0.618444	0.144852	FALSE	FALSE	FALSE	1	0	4	2	4	1	3	1	6	10	5	8	4	4	2	5	6	1	1	1	6	5	5	5
chr1	26180000	26190000	10001	*	chr1	26230000	26240000	10001	*	TRUE	FALSE	FALSE	TRUE	2.49125	loop_206	60000	6.91667	12	-0.185437	-0.526044	-0.340607	0.592365	FALSE	FALSE	FALSE	6	8	5	12	5	8	7	10	11	10	10	9	12	4	4	0	5	5	5	5	7	10	4	4
chr1	26280000	26290000	10001	*	chr1	26380000	26390000	10001	*	TRUE	FALSE	FALSE	TRUE	3.41363	loop_207	110000	6.41667	13	0.133548	-0.668606	-0.802154	0.315187	FALSE	FALSE	FALSE	2	6	7	4	5	12	5	13	9	6	9	13	10	3	4	7	1	8	2	1	5	9	6	7
chr1	26280000	26290000	10001	*	chr1	26410000	26420000	10001	*	FALSE	FALSE	TRUE	FALSE	2.69575	loop_208	140000	5.58333	16	0.433099	0.691145	0.258046	0.485177	FALSE	FALSE	FALSE	4	2	5	6	3	6	3	3	10	6	7	7	3	5	3	6	5	7	9	2	8	16	3	5
chr1	26310000	26320000	10001	*	chr1	26390000	26400000	10001	*	TRUE	FALSE	FALSE	FALSE	2.31536	loop_209	90000	5.25	10	-0.211468	-0.460414	-0.248946	0.718557	FALSE	FALSE	FALSE	6	8	4	10	3	6	3	7	4	7	6	9	5	2	6	4	4	5	1	3	5	4	7	7
chr1	26590000	26600000	10001	*	chr1	26880000	26890000	10001	*	FALSE	FALSE	TRUE	TRUE	3.84843	loop_210	300000	3.33333	11	0.0685069	0.721386	0.652879	0.56664	FALSE	FALSE	FALSE	1	1	6	4	2	2	3	1	0	1	5	2	5	3	1	5	3	1	0	7	6	6	11	4
chr1	26600000	26610000	10001	*	chr1	26790000	26800000	10001	*	TRUE	TRUE	TRUE	TRUE	8.00763	loop_211	200000	15.5417	32	-0.372474	-0.0176753	0.354799	0.474314	FALSE	FALSE	FALSE	24	20	16	19	15	14	10	11	25	19	21	16	4	12	7	6	10	11	11	10	18	32	16	26
chr1	26620000	26630000	10001	*	chr1	26670000	26680000	10001	*	TRUE	TRUE	FALSE	TRUE	2.8233	loop_212	60000	10.3333	19	-0.235824	0.0313787	0.267203	0.771815	FALSE	FALSE	FALSE	13	12	11	13	5	6	12	10	15	10	10	11	6	9	8	6	7	5	7	11	19	17	9	16
chr1	26690000	26700000	10001	*	chr1	26780000	26790000	10001	*	TRUE	FALSE	TRUE	TRUE	4.21005	loop_213	100000	11.3333	18	-0.226051	-0.363863	-0.137813	0.637394	FALSE	FALSE	FALSE	15	16	13	12	14	11	5	11	17	16	15	12	12	6	5	7	7	6	1	5	17	16	15	18
chr1	26810000	26820000	10001	*	chr1	26870000	26880000	10001	*	FALSE	FALSE	TRUE	TRUE	3.7665	loop_214	70000	7.58333	18	-0.16101	0.227264	0.388275	0.708007	FALSE	FALSE	FALSE	7	6	6	6	9	7	8	6	10	7	5	13	7	5	3	4	6	5	4	9	18	9	12	10
chr1	26960000	26970000	10001	*	chr1	27090000	27100000	10001	*	FALSE	FALSE	FALSE	TRUE	3.78645	loop_215	140000	6.08333	12	-0.071739	0.408422	0.480161	0.617013	FALSE	FALSE	FALSE	6	12	6	5	3	4	3	4	4	10	9	6	3	7	1	4	6	2	3	7	6	11	12	12
chr1	26970000	26980000	10001	*	chr1	27280000	27290000	10001	*	FALSE	FALSE	TRUE	FALSE	3.8746	loop_216	320000	3.08333	9	0.860167	1.0255	0.165332	0.393991	FALSE	FALSE	FALSE	2	1	1	2	0	4	2	2	4	2	3	4	7	3	4	1	4	2	6	2	9	4	1	4
chr1	27000000	27010000	10001	*	chr1	27090000	27100000	10001	*	FALSE	FALSE	TRUE	FALSE	3.58291	loop_217	100000	6.25	18	0.60768	0.73124	0.12356	0.352144	FALSE	FALSE	FALSE	5	6	2	2	4	3	4	7	7	9	11	7	6	6	5	4	7	3	7	5	18	6	11	5
chr1	27040000	27050000	10001	*	chr1	27090000	27100000	10001	*	TRUE	TRUE	TRUE	TRUE	3.48848	loop_218	60000	21.375	43	0.137202	-0.320463	-0.457665	0.264231	FALSE	FALSE	FALSE	18	21	18	26	15	26	21	22	43	33	28	30	13	15	24	16	16	14	14	11	20	22	24	23
chr1	27040000	27050000	10001	*	chr1	27280000	27290000	10001	*	FALSE	TRUE	FALSE	TRUE	4.39376	loop_219	250000	6.75	16	0.641998	0.287771	-0.354227	0.436369	FALSE	FALSE	FALSE	4	5	3	5	3	6	9	4	10	9	6	12	10	5	9	5	8	2	3	3	16	8	11	6
chr1	27040000	27050000	10001	*	chr1	27380000	27390000	10001	*	FALSE	FALSE	FALSE	TRUE	2.6263	loop_220	350000	3.08333	9	0.205461	-0.412824	-0.618285	0.721706	FALSE	FALSE	FALSE	1	3	2	4	2	4	2	6	4	9	3	3	3	2	2	3	0	1	1	2	6	1	6	4
chr1	27100000	27110000	10001	*	chr1	27190000	27200000	10001	*	TRUE	FALSE	FALSE	TRUE	3.18745	loop_221	100000	7.875	14	-0.412165	-0.0396505	0.372514	0.635342	FALSE	FALSE	FALSE	4	10	6	8	9	8	10	10	10	5	3	9	8	6	4	8	9	4	8	7	14	10	12	7
chr1	27100000	27110000	10001	*	chr1	27280000	27290000	10001	*	TRUE	TRUE	TRUE	TRUE	6.84222	loop_222	190000	12.3333	25	0.0550652	0.501619	0.446554	0.340084	FALSE	FALSE	FALSE	8	15	4	11	8	15	7	13	18	16	14	10	13	7	10	4	6	14	15	13	25	14	19	17
chr1	27190000	27200000	10001	*	chr1	27280000	27290000	10001	*	TRUE	TRUE	TRUE	TRUE	3.9406	loop_223	100000	8.70833	16	-0.113901	-0.214788	-0.100887	0.889098	FALSE	FALSE	FALSE	8	12	16	10	5	8	7	6	14	7	8	13	4	10	6	9	7	3	3	10	9	10	12	12
chr1	27300000	27310000	10001	*	chr1	27380000	27390000	10001	*	TRUE	TRUE	TRUE	TRUE	5.91098	loop_224	90000	13.0833	19	-0.0735316	0.0108698	0.0844014	0.970148	FALSE	FALSE	FALSE	12	13	16	11	7	18	16	8	18	17	17	16	9	12	6	10	19	14	7	5	15	19	12	17
chr1	27310000	27320000	10001	*	chr1	27600000	27610000	10001	*	FALSE	TRUE	FALSE	FALSE	3.73475	loop_225	300000	3.58333	7	0.636985	0.368492	-0.268493	0.670581	FALSE	FALSE	FALSE	6	1	4	1	5	1	1	2	7	3	4	7	6	4	1	3	1	3	0	3	4	6	7	6
chr1	27390000	27400000	10001	*	chr1	27660000	27670000	10001	*	TRUE	FALSE	FALSE	TRUE	2.87512	loop_226	280000	5	10	0.379596	0.394669	0.015073	0.761762	FALSE	FALSE	FALSE	1	3	7	5	2	4	4	5	6	10	6	8	5	5	2	2	4	2	4	3	9	10	4	9
chr1	27400000	27410000	10001	*	chr1	27600000	27610000	10001	*	TRUE	TRUE	TRUE	TRUE	5.0984	loop_227	210000	8.54167	21	0.0858298	0.773089	0.68726	0.148826	FALSE	FALSE	FALSE	3	3	9	9	5	14	4	4	9	11	8	12	7	2	4	6	7	8	10	8	16	11	21	14
chr1	27420000	27430000	10001	*	chr1	27480000	27490000	10001	*	FALSE	TRUE	FALSE	TRUE	3.0302	loop_228	70000	8.125	16	0.671717	0.456973	-0.214744	0.329062	FALSE	FALSE	FALSE	7	7	7	7	7	5	4	2	14	12	12	16	7	6	3	10	7	3	4	5	11	9	16	14
chr1	27600000	27610000	10001	*	chr1	27660000	27670000	10001	*	TRUE	TRUE	TRUE	TRUE	3.6337	loop_229	70000	13.75	24	0.0458929	-0.597913	-0.643806	0.180159	FALSE	FALSE	FALSE	7	23	20	12	12	12	15	14	20	22	16	18	18	8	15	12	6	4	13	6	24	3	15	15
chr1	27850000	27860000	10001	*	chr1	27970000	27980000	10001	*	TRUE	TRUE	TRUE	TRUE	4.42663	loop_230	130000	8.58333	18	0.27472	0.0684286	-0.206292	0.811457	FALSE	FALSE	FALSE	9	8	9	11	3	6	6	8	18	17	13	5	8	8	3	7	6	4	3	8	11	10	11	14
chr1	27850000	27860000	10001	*	chr1	28200000	28210000	10001	*	FALSE	FALSE	TRUE	TRUE	3.83599	loop_231	360000	2.45833	6	-0.293094	0.634702	0.927797	0.495144	FALSE	FALSE	FALSE	1	2	1	2	1	2	3	4	2	0	3	2	3	1	2	1	3	3	0	3	6	4	6	4
chr1	28090000	28100000	10001	*	chr1	28200000	28210000	10001	*	TRUE	TRUE	TRUE	TRUE	8.99369	loop_232	120000	15.6667	26	-0.073624	0.146072	0.219696	0.810331	FALSE	FALSE	FALSE	21	24	17	17	10	4	6	19	17	17	25	16	8	9	13	15	9	8	15	11	24	26	21	24
chr1	28250000	28260000	10001	*	chr1	28360000	28370000	10001	*	TRUE	TRUE	TRUE	TRUE	3.14013	loop_233	120000	7.08333	14	-0.0401184	0.00933425	0.0494527	0.994857	FALSE	FALSE	FALSE	13	6	12	5	5	6	6	2	14	13	8	10	2	4	2	7	4	9	3	7	7	8	6	11
chr1	28250000	28260000	10001	*	chr1	28500000	28510000	10001	*	FALSE	TRUE	FALSE	TRUE	3.88055	loop_234	260000	3.08333	7	0.768743	-0.100286	-0.869029	0.474132	FALSE	FALSE	FALSE	3	7	3	1	2	4	0	0	7	2	6	3	2	3	4	7	1	0	4	1	7	4	0	3
chr1	28400000	28410000	10001	*	chr1	28470000	28480000	10001	*	TRUE	FALSE	FALSE	TRUE	3.05932	loop_235	80000	9.83333	22	-0.223336	0.0340953	0.257431	0.798022	FALSE	FALSE	FALSE	15	16	9	13	7	7	6	6	13	10	10	15	6	4	5	10	10	8	6	6	22	7	12	13
chr1	28400000	28410000	10001	*	chr1	28600000	28610000	10001	*	FALSE	TRUE	TRUE	TRUE	3.84819	loop_236	210000	5.625	11	0.930508	1.21957	0.289058	0.0673805	FALSE	FALSE	FALSE	6	3	4	4	4	2	2	0	6	11	7	8	4	7	4	4	8	6	6	4	10	7	10	8
chr1	28510000	28520000	10001	*	chr1	28570000	28580000	10001	*	FALSE	FALSE	FALSE	TRUE	2.67465	loop_237	70000	8.70833	17	0.425667	0.27063	-0.155037	0.622071	FALSE	FALSE	FALSE	6	9	10	7	7	8	4	4	13	9	14	14	7	10	9	4	7	2	6	5	11	13	17	13
chr1	28510000	28520000	10001	*	chr1	28600000	28610000	10001	*	TRUE	FALSE	FALSE	FALSE	5.54796	loop_238	100000	8.08333	15	-0.296425	-0.143734	0.15269	0.809612	FALSE	FALSE	FALSE	9	7	9	9	7	10	4	12	8	3	9	9	7	4	10	8	5	5	4	9	11	15	6	14
chr1	28640000	28650000	10001	*	chr1	28730000	28740000	10001	*	TRUE	FALSE	FALSE	FALSE	2.69667	loop_239	100000	7.875	18	0.0115674	-0.854029	-0.865596	0.123462	FALSE	FALSE	FALSE	18	12	9	10	5	7	2	9	11	8	14	13	7	5	10	8	6	6	3	0	9	7	4	6
chr1	28640000	28650000	10001	*	chr1	28870000	28880000	10001	*	FALSE	FALSE	TRUE	TRUE	4.21656	loop_240	240000	3.70833	11	-0.191733	1.11094	1.30268	0.0700531	FALSE	FALSE	FALSE	5	4	3	2	2	1	1	3	4	4	5	1	0	1	3	2	5	5	2	3	11	7	7	8
chr1	28780000	28790000	10001	*	chr1	28870000	28880000	10001	*	TRUE	TRUE	TRUE	TRUE	6.9359	loop_241	100000	19.6667	36	0.0271031	-0.164775	-0.191878	0.808468	FALSE	FALSE	FALSE	25	14	28	27	21	11	17	11	36	33	31	24	9	18	11	12	17	14	16	4	31	22	20	20
chr1	28780000	28790000	10001	*	chr1	29030000	29040000	10001	*	FALSE	TRUE	TRUE	TRUE	3.54678	loop_242	260000	5.79167	13	0.460834	0.324245	-0.136589	0.696163	FALSE	FALSE	FALSE	9	5	1	4	3	4	6	4	13	5	7	7	7	4	6	5	4	2	7	5	6	9	5	11
chr1	28780000	28790000	10001	*	chr1	29200000	29210000	10001	*	FALSE	FALSE	FALSE	TRUE	4.25582	loop_243	430000	4.29167	9	-0.422881	-0.276547	0.146334	0.777136	FALSE	FALSE	FALSE	5	4	6	6	4	4	6	3	5	7	4	5	1	2	4	3	2	2	3	4	4	9	5	5
chr1	28880000	28890000	10001	*	chr1	29030000	29040000	10001	*	TRUE	TRUE	TRUE	TRUE	7.31397	loop_244	160000	19.75	35	0.137025	-0.112757	-0.249782	0.69478	FALSE	FALSE	FALSE	20	27	24	21	14	15	18	12	35	30	30	20	18	19	18	11	19	14	17	15	16	15	22	24
chr1	28880000	28890000	10001	*	chr1	29200000	29210000	10001	*	TRUE	TRUE	TRUE	TRUE	8.25367	loop_245	330000	9.54167	20	0.0625334	-0.0250838	-0.0876172	0.981261	FALSE	FALSE	FALSE	11	9	6	13	10	4	8	11	12	5	20	10	6	5	16	8	8	13	2	7	10	15	10	10
chr1	29030000	29040000	10001	*	chr1	29200000	29210000	10001	*	FALSE	TRUE	TRUE	TRUE	4.43646	loop_246	180000	6.75	16	0.492933	0.716774	0.223841	0.365543	FALSE	FALSE	FALSE	3	7	5	10	3	1	7	3	9	16	12	7	4	1	4	7	5	8	5	8	9	9	9	10
chr1	29110000	29120000	10001	*	chr1	29180000	29190000	10001	*	FALSE	FALSE	TRUE	FALSE	2.15727	loop_247	80000	5.95833	17	-0.189706	0.317945	0.507651	0.647042	FALSE	FALSE	FALSE	3	6	10	9	8	2	3	2	10	7	4	4	4	2	3	7	6	2	3	8	17	7	9	7
chr1	29230000	29240000	10001	*	chr1	29710000	29720000	10001	*	TRUE	TRUE	TRUE	TRUE	4.68285	loop_248	490000	3.08333	7	0.223023	-0.890497	-1.11352	0.324885	FALSE	FALSE	FALSE	4	2	4	4	2	7	0	3	6	6	5	2	3	1	5	4	0	2	0	2	3	2	2	5
chr1	29230000	29240000	10001	*	chr1	30070000	30080000	10001	*	TRUE	TRUE	TRUE	TRUE	4.68294	loop_249	850000	2.625	6	-0.431769	0.36464	0.796409	0.670238	FALSE	FALSE	FALSE	3	3	1	1	3	2	1	6	6	3	0	2	1	4	0	1	3	4	5	1	3	0	6	4
chr1	29240000	29250000	10001	*	chr1	30710000	30720000	10001	*	TRUE	TRUE	TRUE	TRUE	4.62738	loop_250	1480000	3.04167	8	-0.603186	-0.598526	0.00466013	0.642723	FALSE	FALSE	FALSE	7	8	1	5	3	2	2	3	1	4	4	2	0	2	5	3	3	3	0	3	3	2	2	5
chr1	29330000	29340000	10001	*	chr1	29450000	29460000	10001	*	FALSE	FALSE	FALSE	TRUE	2.29327	loop_251	130000	5.58333	15	-0.15636	-0.965149	-0.808789	0.189082	FALSE	FALSE	FALSE	5	6	7	7	5	5	7	10	6	15	7	7	3	6	5	3	2	2	2	3	4	9	6	2
chr1	29340000	29350000	10001	*	chr1	30710000	30720000	10001	*	FALSE	FALSE	FALSE	TRUE	3.30199	loop_252	1380000	2.125	5	0.32548	-0.457076	-0.782556	0.678156	FALSE	FALSE	FALSE	3	2	1	1	2	2	4	1	4	5	3	3	1	2	3	1	1	0	2	1	2	2	3	2
chr1	29370000	29380000	10001	*	chr1	30700000	30710000	10001	*	FALSE	FALSE	TRUE	FALSE	3.37598	loop_253	1340000	2.625	6	-0.162322	0.333094	0.495416	0.836128	FALSE	FALSE	FALSE	5	3	4	4	0	4	0	0	3	2	0	4	0	3	3	3	2	0	6	2	3	3	5	4
chr1	29390000	29400000	10001	*	chr1	30400000	30410000	10001	*	FALSE	FALSE	TRUE	TRUE	6.55941	loop_254	1020000	5.04167	9	0.141761	0.250157	0.108396	0.924292	FALSE	FALSE	FALSE	5	3	1	4	7	3	3	9	8	7	4	3	9	5	4	3	7	7	9	2	5	3	6	4
chr1	29500000	29510000	10001	*	chr1	29840000	29850000	10001	*	TRUE	TRUE	FALSE	TRUE	2.97715	loop_255	350000	5.45833	12	0.31467	0.122644	-0.192026	0.841696	FALSE	FALSE	FALSE	5	10	6	3	3	2	4	5	6	12	7	5	4	6	8	3	3	4	6	6	6	4	7	6
chr1	29510000	29520000	10001	*	chr1	30100000	30110000	10001	*	TRUE	TRUE	TRUE	TRUE	3.12004	loop_256	600000	4.04167	9	0.593174	0.355855	-0.237318	0.658825	FALSE	FALSE	FALSE	9	2	4	1	2	4	2	1	7	8	5	5	4	2	6	3	3	3	6	2	4	6	5	3
chr1	29510000	29520000	10001	*	chr1	29660000	29670000	10001	*	TRUE	FALSE	FALSE	FALSE	2.48113	loop_257	160000	6.875	14	-0.266896	-0.319016	-0.0521205	0.795079	FALSE	FALSE	FALSE	12	10	14	4	7	5	1	8	11	6	9	8	9	6	5	1	8	4	6	7	10	5	2	7
chr1	29510000	29520000	10001	*	chr1	29700000	29710000	10001	*	TRUE	TRUE	TRUE	TRUE	2.59306	loop_258	200000	7.83333	15	0.0585235	0.375253	0.316729	0.707647	FALSE	FALSE	FALSE	10	2	7	4	6	7	5	12	15	8	8	9	9	6	5	2	12	6	8	7	9	15	9	7
chr1	29700000	29710000	10001	*	chr1	29850000	29860000	10001	*	FALSE	FALSE	FALSE	TRUE	2.36028	loop_259	160000	4.45833	11	0.137947	-0.36086	-0.498807	0.727973	FALSE	FALSE	FALSE	3	4	3	6	6	2	4	7	7	5	9	11	3	4	1	3	1	2	4	4	3	7	5	3
chr1	29700000	29710000	10001	*	chr1	30110000	30120000	10001	*	FALSE	FALSE	FALSE	TRUE	3.17651	loop_260	420000	4.875	9	-0.469193	-0.316957	0.152236	0.725144	FALSE	FALSE	FALSE	8	3	3	3	9	7	6	5	8	6	4	4	2	2	5	4	2	6	6	4	4	3	5	8
chr1	29700000	29710000	10001	*	chr1	30700000	30710000	10001	*	TRUE	TRUE	FALSE	TRUE	4.35142	loop_261	1010000	3.66667	8	-0.258557	-0.587734	-0.329177	0.709741	FALSE	FALSE	FALSE	4	6	3	4	5	6	1	5	5	2	4	3	4	6	3	3	8	2	1	3	3	0	3	4
chr1	29790000	29800000	10001	*	chr1	30100000	30110000	10001	*	TRUE	TRUE	TRUE	TRUE	3.14343	loop_262	320000	6.29167	11	0.0556465	0.118019	0.0623727	0.974679	FALSE	FALSE	FALSE	6	8	10	9	2	3	5	5	11	10	9	6	4	8	4	2	8	6	11	4	4	7	3	6
chr1	29790000	29800000	10001	*	chr1	30710000	30720000	10001	*	FALSE	FALSE	TRUE	TRUE	3.78371	loop_263	930000	2.125	7	0.694104	1.03424	0.340133	0.540314	FALSE	FALSE	FALSE	4	1	2	2	0	2	0	0	1	4	3	1	2	4	2	1	3	1	3	3	7	2	1	2
chr1	29910000	29920000	10001	*	chr1	30080000	30090000	10001	*	TRUE	TRUE	TRUE	TRUE	2.93519	loop_264	180000	10.25	17	-0.262939	-0.125122	0.137817	0.807826	FALSE	FALSE	FALSE	17	12	11	13	7	12	8	7	15	15	10	11	9	4	7	8	14	12	5	11	9	10	6	13
chr1	30100000	30110000	10001	*	chr1	30700000	30710000	10001	*	TRUE	FALSE	FALSE	TRUE	4.60685	loop_265	610000	3.125	6	-0.26874	-0.325795	-0.0570548	0.885825	FALSE	FALSE	FALSE	5	4	3	6	2	3	3	2	3	6	3	3	2	3	2	3	4	1	3	4	2	5	2	1
chr1	30380000	30390000	10001	*	chr1	30690000	30700000	10001	*	TRUE	TRUE	FALSE	TRUE	3.21722	loop_266	320000	4.83333	9	-0.422815	-0.264967	0.157848	0.760868	FALSE	FALSE	FALSE	6	7	5	6	5	6	5	3	5	7	2	7	5	5	3	1	3	4	5	4	9	3	3	7
chr1	30720000	30730000	10001	*	chr1	30770000	30780000	10001	*	TRUE	TRUE	TRUE	TRUE	5.32746	loop_267	60000	22.5	35	-0.177187	-0.425496	-0.24831	0.293831	FALSE	FALSE	FALSE	27	26	20	22	24	28	16	31	30	33	24	23	21	15	16	23	14	11	12	21	35	19	21	28
chr1	30720000	30730000	10001	*	chr1	30910000	30920000	10001	*	TRUE	TRUE	FALSE	TRUE	7.9937	loop_268	200000	11.2083	18	-0.378381	-1.22277	-0.844388	0.00225352	FALSE	TRUE	TRUE	15	14	16	16	15	15	11	15	18	15	9	17	11	9	14	5	8	4	6	6	4	9	7	10
chr1	30800000	30810000	10001	*	chr1	30910000	30920000	10001	*	TRUE	TRUE	TRUE	TRUE	8.21155	loop_269	120000	22.5	39	-0.112799	-0.174155	-0.0613565	0.829041	FALSE	FALSE	FALSE	34	25	17	22	17	25	27	16	26	39	23	25	26	18	16	12	14	21	16	21	33	21	24	22
chr1	31080000	31090000	10001	*	chr1	31150000	31160000	10001	*	TRUE	FALSE	TRUE	FALSE	3.83776	loop_270	80000	6.75	14	0.408201	0.822705	0.414503	0.260968	FALSE	FALSE	FALSE	8	9	6	2	1	3	6	3	6	11	9	7	3	6	3	9	5	5	9	7	10	7	13	14
chr1	31180000	31190000	10001	*	chr1	31330000	31340000	10001	*	TRUE	TRUE	TRUE	TRUE	4.00599	loop_271	160000	9.29167	17	-0.107587	-0.309063	-0.201475	0.779252	FALSE	FALSE	FALSE	12	16	13	12	3	13	4	7	17	15	13	12	1	9	4	9	7	11	3	5	7	11	11	8
chr1	31180000	31190000	10001	*	chr1	31420000	31430000	10001	*	FALSE	TRUE	FALSE	FALSE	4.20866	loop_272	250000	5.83333	13	0.576467	0.243894	-0.332573	0.559725	FALSE	FALSE	FALSE	7	3	4	7	3	4	2	6	11	13	12	8	6	4	3	3	6	3	6	2	5	4	12	6
chr1	31180000	31190000	10001	*	chr1	31540000	31550000	10001	*	TRUE	TRUE	TRUE	TRUE	3.31743	loop_273	370000	4.08333	13	0.424576	0.968756	0.54418	0.315455	FALSE	FALSE	FALSE	2	3	3	3	2	6	1	1	4	3	3	2	6	7	1	4	5	2	5	3	9	13	3	7
chr1	31190000	31200000	10001	*	chr1	31260000	31270000	10001	*	TRUE	FALSE	FALSE	TRUE	2.33295	loop_274	80000	6.83333	12	-0.464502	-0.37652	0.0879822	0.593142	FALSE	FALSE	FALSE	10	12	10	6	12	7	2	4	8	6	8	3	7	8	5	4	8	3	5	4	8	9	10	5
chr1	31450000	31460000	10001	*	chr1	31600000	31610000	10001	*	FALSE	TRUE	FALSE	FALSE	2.39401	loop_275	160000	4.20833	10	0.254147	0.307891	0.0537434	0.879446	FALSE	FALSE	FALSE	4	3	3	6	1	2	4	5	10	5	2	9	2	3	3	3	5	5	1	3	8	3	6	5
chr1	31460000	31470000	10001	*	chr1	31540000	31550000	10001	*	TRUE	TRUE	TRUE	TRUE	3.80878	loop_276	90000	13.375	23	-0.46984	0.399301	0.869141	0.0343961	FALSE	FALSE	FALSE	14	17	18	20	13	4	5	13	13	15	11	13	10	8	10	1	18	14	16	14	19	17	15	23
chr1	31560000	31570000	10001	*	chr1	31590000	31600000	10001	*	FALSE	TRUE	FALSE	FALSE	3.2158	loop_277	40000	24.0417	44	-0.0766288	-0.501728	-0.425099	0.127593	FALSE	FALSE	FALSE	35	30	25	31	29	18	20	19	31	44	33	33	24	17	16	16	13	12	16	13	30	18	29	25
chr1	31660000	31670000	10001	*	chr1	31960000	31970000	10001	*	FALSE	FALSE	TRUE	TRUE	2.85604	loop_278	310000	2.66667	7	0.142571	0.697963	0.555392	0.638451	FALSE	FALSE	FALSE	3	1	1	2	4	3	2	0	2	3	1	3	3	2	3	2	2	1	5	4	2	3	5	7
chr1	31660000	31670000	10001	*	chr1	31740000	31750000	10001	*	TRUE	TRUE	TRUE	TRUE	4.04944	loop_279	90000	16.4583	31	0.0962518	-0.259677	-0.355929	0.619732	FALSE	FALSE	FALSE	8	11	23	13	17	25	19	12	19	27	23	31	19	10	9	13	10	9	16	13	22	14	20	12
chr1	31660000	31670000	10001	*	chr1	31780000	31790000	10001	*	TRUE	FALSE	TRUE	TRUE	3.89926	loop_280	130000	10.75	22	0.0313988	-0.144826	-0.176225	0.895541	FALSE	FALSE	FALSE	12	10	14	12	6	10	8	12	17	22	12	14	9	8	6	7	6	16	5	6	12	10	10	14
chr1	31670000	31680000	10001	*	chr1	31700000	31710000	10001	*	FALSE	TRUE	FALSE	TRUE	1.98001	loop_281	40000	16.75	30	0.213618	-0.265131	-0.478749	0.350897	FALSE	FALSE	FALSE	10	28	17	18	14	12	16	13	23	30	16	17	21	15	26	11	6	11	11	16	20	12	20	19
chr1	31800000	31810000	10001	*	chr1	31960000	31970000	10001	*	TRUE	TRUE	TRUE	TRUE	3.78273	loop_282	170000	7	17	0.49924	0.536631	0.0373914	0.532293	FALSE	FALSE	FALSE	8	3	3	10	1	8	4	4	13	12	7	12	4	5	7	3	10	3	4	4	12	4	10	17
chr1	31810000	31820000	10001	*	chr1	31890000	31900000	10001	*	FALSE	FALSE	FALSE	TRUE	1.94633	loop_283	90000	7.08333	16	0.112245	-0.0988993	-0.211144	0.915384	FALSE	FALSE	FALSE	6	6	16	6	6	5	3	4	13	6	7	5	11	4	7	8	6	3	2	1	11	12	10	12
chr1	32210000	32220000	10001	*	chr1	32310000	32320000	10001	*	TRUE	FALSE	FALSE	FALSE	2.3185	loop_284	110000	7.29167	15	-0.073966	-0.0964687	-0.0225027	0.979001	FALSE	FALSE	FALSE	11	5	6	7	6	6	7	9	13	10	8	15	6	4	4	1	8	2	6	7	8	6	5	15
chr1	32210000	32220000	10001	*	chr1	32350000	32360000	10001	*	FALSE	TRUE	FALSE	TRUE	3.20408	loop_285	150000	6.45833	14	0.615599	-0.257396	-0.872995	0.195639	FALSE	FALSE	FALSE	5	3	8	4	6	8	5	4	9	14	9	13	5	5	6	11	3	5	4	3	10	0	7	8
chr1	32450000	32460000	10001	*	chr1	32620000	32630000	10001	*	TRUE	TRUE	FALSE	TRUE	2.84279	loop_286	180000	4.91667	15	0.124904	-0.0666912	-0.191595	0.947679	FALSE	FALSE	FALSE	4	3	6	2	7	6	3	5	8	5	15	2	5	5	3	2	5	4	3	5	7	4	6	3
chr1	32520000	32530000	10001	*	chr1	32850000	32860000	10001	*	TRUE	FALSE	FALSE	TRUE	2.90158	loop_287	340000	2.91667	9	-0.115303	-0.19304	-0.0777363	0.970437	FALSE	FALSE	FALSE	2	2	4	2	5	0	3	5	6	5	3	3	1	2	2	1	2	3	0	0	5	1	4	9
chr1	32520000	32530000	10001	*	chr1	32620000	32630000	10001	*	TRUE	FALSE	TRUE	TRUE	2.74657	loop_288	110000	7.25	13	-0.326194	-0.0722484	0.253945	0.787493	FALSE	FALSE	FALSE	11	10	7	11	5	2	10	5	7	13	4	9	5	8	4	3	9	3	5	7	8	13	8	7
chr1	32710000	32720000	10001	*	chr1	32770000	32780000	10001	*	TRUE	TRUE	TRUE	TRUE	3.81195	loop_289	70000	18.5833	30	-0.233255	0.0327849	0.26604	0.679393	FALSE	FALSE	FALSE	23	20	14	25	10	23	19	14	30	17	24	16	10	17	15	9	17	18	23	7	27	25	15	28
chr1	32930000	32940000	10001	*	chr1	33000000	33010000	10001	*	TRUE	TRUE	TRUE	TRUE	4.46364	loop_290	80000	23.9167	43	0.01861	-0.689323	-0.707933	0.00522532	FALSE	TRUE	TRUE	29	34	28	36	25	20	19	18	43	42	42	32	19	16	20	19	20	11	15	14	21	15	17	19
chr1	32930000	32940000	10001	*	chr1	33050000	33060000	10001	*	FALSE	FALSE	TRUE	FALSE	3.42174	loop_291	130000	8.625	18	0.177339	0.691609	0.51427	0.250858	FALSE	FALSE	FALSE	9	4	13	8	4	4	7	4	16	14	9	9	8	3	4	3	6	8	12	4	18	13	14	13
chr1	33110000	33120000	10001	*	chr1	33290000	33300000	10001	*	FALSE	FALSE	TRUE	TRUE	2.95276	loop_292	190000	4	10	0.468471	1.11239	0.643918	0.223531	FALSE	FALSE	FALSE	4	3	2	0	3	3	2	3	5	6	8	3	2	1	2	4	2	5	6	7	10	7	6	2
chr1	33110000	33120000	10001	*	chr1	33360000	33370000	10001	*	FALSE	FALSE	TRUE	TRUE	3.20944	loop_293	260000	4.5	11	0.680386	1.33945	0.659069	0.0977231	FALSE	FALSE	FALSE	1	5	2	0	4	1	4	3	3	2	4	5	6	4	6	4	7	11	4	3	7	6	8	8
chr1	33110000	33120000	10001	*	chr1	33450000	33460000	10001	*	TRUE	FALSE	TRUE	TRUE	3.94963	loop_294	350000	3.66667	11	-0.040417	0.158774	0.199191	0.95182	FALSE	FALSE	FALSE	5	2	3	3	2	3	3	5	2	2	5	4	3	6	3	2	5	3	1	1	11	6	5	3
chr1	33210000	33220000	10001	*	chr1	33360000	33370000	10001	*	TRUE	FALSE	TRUE	TRUE	2.86735	loop_295	160000	5.95833	11	-0.180332	0.0910086	0.27134	0.879768	FALSE	FALSE	FALSE	4	8	3	9	6	11	4	2	7	10	5	2	5	5	5	5	1	8	6	9	8	8	5	7
chr1	33210000	33220000	10001	*	chr1	33460000	33470000	10001	*	FALSE	FALSE	TRUE	TRUE	4.00116	loop_296	260000	5.5	10	0.508639	1.15973	0.65109	0.108925	FALSE	FALSE	FALSE	0	8	6	4	3	4	2	1	8	9	3	10	4	2	4	3	9	7	10	2	10	9	6	8
chr1	33290000	33300000	10001	*	chr1	33360000	33370000	10001	*	TRUE	TRUE	TRUE	TRUE	3.35527	loop_297	80000	13.625	23	0.0675222	-1.84174e-05	-0.0675406	0.978989	FALSE	FALSE	FALSE	15	19	8	18	5	12	10	17	20	23	22	13	13	10	10	8	16	13	8	17	14	8	18	10
chr1	33290000	33300000	10001	*	chr1	33460000	33470000	10001	*	TRUE	TRUE	TRUE	TRUE	5.19219	loop_298	180000	9	15	-0.0266657	-0.253769	-0.227103	0.831973	FALSE	FALSE	FALSE	7	6	7	14	6	15	11	7	12	14	12	12	7	9	3	9	5	11	7	6	5	6	14	11
chr1	33290000	33300000	10001	*	chr1	33610000	33620000	10001	*	TRUE	FALSE	TRUE	TRUE	3.6973	loop_299	330000	3.33333	7	-0.176641	0.165184	0.341825	0.897186	FALSE	FALSE	FALSE	4	4	5	1	4	1	2	5	2	4	3	5	2	4	5	0	6	3	4	7	2	2	3	2
chr1	33360000	33370000	10001	*	chr1	33450000	33460000	10001	*	TRUE	TRUE	FALSE	TRUE	4.38038	loop_300	100000	13.375	30	0.150135	-0.353165	-0.5033	0.406459	FALSE	FALSE	FALSE	13	14	17	13	10	14	14	11	30	14	19	16	16	9	13	12	11	14	9	9	4	7	13	19
chr1	33470000	33480000	10001	*	chr1	33610000	33620000	10001	*	FALSE	TRUE	TRUE	TRUE	3.0722	loop_301	150000	8.54167	18	-0.0813181	0.0897489	0.171067	0.930245	FALSE	FALSE	FALSE	12	10	10	5	2	5	12	9	18	8	9	10	6	3	10	4	8	7	8	7	11	7	10	14
chr1	33630000	33640000	10001	*	chr1	34590000	34600000	10001	*	TRUE	TRUE	TRUE	TRUE	3.66912	loop_302	970000	6.41667	17	-0.537283	-0.104502	0.43278	0.596811	FALSE	FALSE	FALSE	10	7	17	7	4	6	6	2	5	3	5	10	5	5	2	7	11	8	5	7	9	5	4	4
chr1	33630000	33640000	10001	*	chr1	34740000	34750000	10001	*	TRUE	TRUE	FALSE	TRUE	3.83944	loop_303	1120000	5.5	11	0.120446	-0.453433	-0.573879	0.595523	FALSE	FALSE	FALSE	7	6	3	5	5	6	3	9	8	11	9	9	2	5	8	2	3	2	8	4	9	2	3	3
chr1	34460000	34470000	10001	*	chr1	34600000	34610000	10001	*	FALSE	FALSE	TRUE	FALSE	3.04478	loop_304	150000	6.25	15	-0.25981	1.3292	1.58901	0.000334478	FALSE	TRUE	TRUE	3	3	6	2	4	8	4	3	3	4	3	8	3	4	4	1	8	10	10	11	10	10	15	13
chr1	34460000	34470000	10001	*	chr1	34740000	34750000	10001	*	FALSE	FALSE	TRUE	TRUE	3.55437	loop_305	290000	5.45833	15	0.33195	1.04645	0.714502	0.140576	FALSE	FALSE	FALSE	4	8	3	5	1	3	2	4	5	4	6	5	4	5	9	1	6	9	8	6	5	9	4	15
chr1	34780000	34790000	10001	*	chr1	34850000	34860000	10001	*	TRUE	TRUE	TRUE	TRUE	2.95781	loop_306	80000	15.9167	27	-0.131663	-0.373962	-0.242299	0.558911	FALSE	FALSE	FALSE	19	27	17	17	13	18	11	15	25	24	21	27	11	7	18	7	17	12	19	13	14	11	9	10
chr1	35000000	35010000	10001	*	chr1	35100000	35110000	10001	*	TRUE	FALSE	FALSE	FALSE	2.20659	loop_307	110000	6.5	15	-0.747422	-0.214495	0.532927	0.323453	FALSE	FALSE	FALSE	7	11	11	15	5	7	3	4	7	6	10	5	2	1	6	4	11	6	6	3	7	5	7	7
chr1	35190000	35200000	10001	*	chr1	35550000	35560000	10001	*	FALSE	TRUE	FALSE	TRUE	3.41878	loop_308	370000	3.25	7	0.22205	0.209121	-0.0129293	0.945484	FALSE	FALSE	FALSE	5	2	4	2	2	2	4	1	3	7	2	6	1	4	1	5	2	4	2	5	1	3	4	6
chr1	35200000	35210000	10001	*	chr1	35290000	35300000	10001	*	TRUE	TRUE	TRUE	TRUE	3.77018	loop_309	100000	13.1667	24	-0.368089	0.113854	0.481943	0.382295	FALSE	FALSE	FALSE	21	24	10	23	7	10	7	8	17	15	16	18	2	8	8	8	14	9	14	12	22	13	17	13
chr1	35200000	35210000	10001	*	chr1	35390000	35400000	10001	*	FALSE	TRUE	FALSE	FALSE	3.31811	loop_310	200000	6.33333	16	0.399914	0.0547538	-0.34516	0.692849	FALSE	FALSE	FALSE	5	4	9	11	4	4	4	3	16	9	11	9	6	2	5	5	3	4	6	6	3	7	6	10
chr1	35440000	35450000	10001	*	chr1	35730000	35740000	10001	*	TRUE	FALSE	TRUE	FALSE	3.14453	loop_311	300000	4.04167	8	-0.510703	-0.18472	0.325983	0.742899	FALSE	FALSE	FALSE	8	7	6	3	6	0	3	4	2	3	3	5	4	4	3	3	6	6	1	3	3	3	6	5
chr1	35450000	35460000	10001	*	chr1	35560000	35570000	10001	*	TRUE	TRUE	TRUE	TRUE	5.55696	loop_312	120000	15.7083	28	-0.422008	0.0228804	0.444889	0.361746	FALSE	FALSE	FALSE	13	15	14	28	13	16	17	14	22	14	26	21	11	9	5	3	15	13	21	14	21	17	18	17
chr1	35450000	35460000	10001	*	chr1	35770000	35780000	10001	*	FALSE	TRUE	FALSE	TRUE	3.46339	loop_313	330000	4.75	11	-0.021701	0.465881	0.487582	0.655132	FALSE	FALSE	FALSE	8	4	6	4	3	4	3	1	0	11	3	5	6	4	4	2	3	6	5	7	5	7	8	5
chr1	35570000	35580000	10001	*	chr1	35720000	35730000	10001	*	TRUE	TRUE	TRUE	TRUE	3.91513	loop_314	160000	13.3333	28	0.22548	-0.117461	-0.342941	0.624059	FALSE	FALSE	FALSE	14	12	9	10	11	19	12	11	28	20	15	16	9	18	7	13	12	12	10	10	15	13	11	13
chr1	35570000	35580000	10001	*	chr1	35770000	35780000	10001	*	TRUE	FALSE	TRUE	TRUE	4.19685	loop_315	210000	8.25	13	-0.484844	-0.0113077	0.473536	0.502656	FALSE	FALSE	FALSE	9	11	12	6	8	12	8	5	9	6	10	8	4	5	3	10	7	9	13	9	9	9	7	9
chr1	35630000	35640000	10001	*	chr1	35710000	35720000	10001	*	FALSE	FALSE	TRUE	FALSE	1.96646	loop_316	90000	8.91667	14	0.219048	0.589669	0.370621	0.45082	FALSE	FALSE	FALSE	4	9	6	8	4	7	6	13	9	13	6	10	12	7	4	10	11	14	13	13	10	9	4	12
chr1	35930000	35940000	10001	*	chr1	36050000	36060000	10001	*	TRUE	FALSE	FALSE	FALSE	2.55913	loop_317	130000	4.75	11	-0.324171	-0.452331	-0.12816	0.748878	FALSE	FALSE	FALSE	8	7	7	6	3	1	6	5	3	7	9	6	3	3	2	4	6	0	1	2	3	4	7	11
chr1	36100000	36110000	10001	*	chr1	36130000	36140000	10001	*	TRUE	TRUE	TRUE	TRUE	3.11079	loop_318	40000	24.7083	41	0.181941	0.0788776	-0.103063	0.796065	FALSE	FALSE	FALSE	31	25	21	26	20	14	21	21	39	41	27	34	26	16	20	19	26	24	27	19	24	24	21	27
chr1	36100000	36110000	10001	*	chr1	36180000	36190000	10001	*	TRUE	TRUE	TRUE	TRUE	3.37014	loop_319	90000	8.95833	17	-0.133408	-0.180701	-0.0472924	0.917527	FALSE	FALSE	FALSE	10	8	6	9	12	4	12	12	7	11	11	17	6	7	6	8	12	6	7	10	13	3	8	10
chr1	36100000	36110000	10001	*	chr1	36280000	36290000	10001	*	FALSE	FALSE	TRUE	TRUE	4.96786	loop_320	190000	9.75	18	0.504399	0.922365	0.417966	0.0736847	FALSE	FALSE	FALSE	12	5	8	11	2	5	3	7	14	12	14	11	5	3	10	11	8	8	8	17	18	12	17	13
chr1	36100000	36110000	10001	*	chr1	36420000	36430000	10001	*	TRUE	TRUE	TRUE	TRUE	3.97008	loop_321	330000	5.16667	10	0.565943	0.357118	-0.208825	0.606141	FALSE	FALSE	FALSE	4	6	2	3	5	4	3	4	8	5	4	8	4	6	8	6	4	3	5	6	4	8	4	10
chr1	36150000	36160000	10001	*	chr1	36220000	36230000	10001	*	FALSE	TRUE	FALSE	FALSE	2.92733	loop_322	80000	10.4583	21	0.41752	-0.278735	-0.696254	0.218163	FALSE	FALSE	FALSE	17	15	6	4	10	10	4	9	21	12	17	18	10	7	16	8	8	3	7	7	15	7	14	6
chr1	36150000	36160000	10001	*	chr1	36280000	36290000	10001	*	FALSE	TRUE	TRUE	TRUE	3.67486	loop_323	140000	13.7083	24	0.616181	0.253798	-0.362383	0.176952	FALSE	FALSE	FALSE	11	8	16	13	12	9	5	10	24	20	17	22	12	18	11	15	13	13	8	10	18	14	15	15
chr1	36180000	36190000	10001	*	chr1	36280000	36290000	10001	*	FALSE	FALSE	FALSE	TRUE	2.78294	loop_324	110000	12.5417	23	0.308946	0.0427742	-0.266172	0.649267	FALSE	FALSE	FALSE	16	11	16	14	8	12	8	4	23	16	16	15	11	11	14	12	8	12	15	6	17	11	9	16
chr1	36220000	36230000	10001	*	chr1	36280000	36290000	10001	*	TRUE	FALSE	FALSE	FALSE	2.62808	loop_325	70000	13	23	-0.139591	-0.263522	-0.12393	0.775312	FALSE	FALSE	FALSE	23	14	10	19	6	10	13	14	18	17	11	17	13	7	7	16	6	12	5	11	13	17	16	17
chr1	36340000	36350000	10001	*	chr1	36420000	36430000	10001	*	TRUE	TRUE	TRUE	TRUE	5.15748	loop_326	90000	15.6667	28	0.0864552	-0.168677	-0.255132	0.754197	FALSE	FALSE	FALSE	19	20	14	22	8	11	13	17	18	19	22	28	15	17	13	9	12	15	10	20	19	15	9	11
chr1	36570000	36580000	10001	*	chr1	37430000	37440000	10001	*	TRUE	TRUE	TRUE	TRUE	3.74914	loop_327	870000	5.16667	12	-0.79824	-0.337325	0.460915	0.472704	FALSE	FALSE	FALSE	4	8	6	8	3	6	4	12	8	5	5	2	1	8	3	0	3	4	6	10	2	7	8	1
chr1	36580000	36590000	10001	*	chr1	37320000	37330000	10001	*	TRUE	FALSE	FALSE	TRUE	2.6155	loop_328	750000	5	11	-0.729196	-0.658711	0.070485	0.385994	FALSE	FALSE	FALSE	4	10	4	5	5	4	8	11	3	3	9	4	6	0	5	4	3	5	3	5	9	4	4	2
chr1	36700000	36710000	10001	*	chr1	37310000	37320000	10001	*	TRUE	FALSE	FALSE	FALSE	2.96367	loop_329	620000	4.45833	10	-0.35099	-0.410218	-0.0592277	0.788983	FALSE	FALSE	FALSE	3	10	4	10	4	4	4	2	4	5	9	2	9	0	5	1	3	5	3	4	4	3	4	5
chr1	37450000	37460000	10001	*	chr1	37680000	37690000	10001	*	TRUE	TRUE	TRUE	TRUE	4.93686	loop_330	240000	8.66667	15	0.081928	0.892101	0.810173	0.0446478	FALSE	FALSE	FALSE	10	5	9	8	7	5	2	6	15	11	4	10	3	6	6	5	14	8	11	13	13	8	15	14
chr1	37590000	37600000	10001	*	chr1	37800000	37810000	10001	*	FALSE	FALSE	FALSE	TRUE	3.2135	loop_331	220000	5.20833	10	-0.0492781	-0.289588	-0.24031	0.869264	FALSE	FALSE	FALSE	2	6	7	8	4	5	6	5	10	9	4	8	6	2	3	4	3	6	5	5	4	8	2	3
chr1	37600000	37610000	10001	*	chr1	37680000	37690000	10001	*	TRUE	TRUE	TRUE	TRUE	4.38614	loop_332	90000	17.1667	36	0.116054	-0.462687	-0.578741	0.16772	FALSE	FALSE	FALSE	22	16	14	29	17	13	14	16	29	36	21	17	18	14	16	15	16	12	14	10	12	12	12	17
chr1	37690000	37700000	10001	*	chr1	37980000	37990000	10001	*	FALSE	FALSE	TRUE	TRUE	3.40659	loop_333	300000	3.875	9	-0.121899	0.843854	0.965753	0.264517	FALSE	FALSE	FALSE	2	8	2	4	3	3	0	3	3	3	1	7	2	3	3	2	7	7	1	4	4	3	9	9
chr1	37700000	37710000	10001	*	chr1	37800000	37810000	10001	*	FALSE	FALSE	TRUE	TRUE	2.90182	loop_334	110000	8.16667	18	-0.258974	0.29728	0.556254	0.483338	FALSE	FALSE	FALSE	8	7	8	8	10	4	10	6	7	9	12	7	9	3	3	6	7	6	11	12	18	11	8	6
chr1	37810000	37820000	10001	*	chr1	37850000	37860000	10001	*	TRUE	FALSE	FALSE	TRUE	2.41964	loop_335	50000	16.2083	27	0.0780298	-0.099724	-0.177754	0.867396	FALSE	FALSE	FALSE	22	21	21	22	9	7	12	14	19	27	21	21	15	17	16	8	16	19	12	16	20	15	8	11
chr1	37890000	37900000	10001	*	chr1	37970000	37980000	10001	*	TRUE	FALSE	TRUE	TRUE	3.76575	loop_336	90000	8	17	0.112333	-0.57509	-0.687423	0.304128	FALSE	FALSE	FALSE	16	9	11	10	5	8	3	6	14	17	13	8	4	6	7	10	3	9	6	3	7	5	3	9
chr1	38010000	38020000	10001	*	chr1	38990000	39000000	10001	*	FALSE	FALSE	FALSE	TRUE	2.82314	loop_337	990000	1.91667	5	-0.125888	-0.286242	-0.160355	0.954997	FALSE	FALSE	FALSE	1	1	2	2	2	2	3	2	2	3	2	3	1	4	0	0	0	1	1	0	3	5	5	1
chr1	38020000	38030000	10001	*	chr1	38830000	38840000	10001	*	TRUE	TRUE	TRUE	TRUE	6.05263	loop_338	820000	9.66667	19	0.328196	0.312325	-0.0158708	0.723985	FALSE	FALSE	FALSE	18	11	10	4	5	2	8	7	12	19	13	17	7	5	8	7	15	2	10	12	11	11	7	11
chr1	38050000	38060000	10001	*	chr1	38140000	38150000	10001	*	TRUE	FALSE	FALSE	TRUE	2.79631	loop_339	100000	7.29167	13	-0.233858	-0.104864	0.128994	0.889463	FALSE	FALSE	FALSE	6	7	9	8	11	6	6	7	13	8	6	7	2	7	8	5	6	7	7	8	4	12	6	9
chr1	38480000	38490000	10001	*	chr1	38820000	38830000	10001	*	FALSE	FALSE	TRUE	FALSE	2.64903	loop_340	350000	4.58333	14	0.770709	0.969033	0.198324	0.338177	FALSE	FALSE	FALSE	4	5	5	0	5	0	3	1	8	7	9	9	2	4	1	3	1	7	8	4	14	3	4	3
chr1	38650000	38660000	10001	*	chr1	38780000	38790000	10001	*	FALSE	TRUE	FALSE	FALSE	2.23384	loop_341	140000	6.79167	16	0.501656	0.419432	-0.0822241	0.571491	FALSE	FALSE	FALSE	11	7	7	5	4	4	2	3	16	9	9	8	6	5	6	6	8	6	6	9	5	10	3	8
chr1	38870000	38880000	10001	*	chr1	38950000	38960000	10001	*	TRUE	FALSE	FALSE	FALSE	2.29464	loop_342	90000	7.58333	13	-0.0943826	-0.0505711	0.0438114	0.981489	FALSE	FALSE	FALSE	7	9	6	10	8	11	4	5	12	5	13	7	10	9	4	2	6	11	8	5	9	4	11	6
chr1	38870000	38880000	10001	*	chr1	38990000	39000000	10001	*	TRUE	TRUE	TRUE	TRUE	3.4156	loop_343	130000	9.125	14	-0.0444089	0.104719	0.149128	0.937398	FALSE	FALSE	FALSE	11	8	7	9	7	6	10	11	14	10	11	13	8	7	6	5	11	9	12	9	9	8	7	11
chr1	39090000	39100000	10001	*	chr1	39530000	39540000	10001	*	TRUE	TRUE	TRUE	TRUE	4.18126	loop_344	450000	5.08333	11	0.218358	-0.0213306	-0.239688	0.894119	FALSE	FALSE	FALSE	7	5	4	5	7	2	1	6	9	6	8	11	3	4	4	2	6	4	3	2	10	4	4	5
chr1	39100000	39110000	10001	*	chr1	39390000	39400000	10001	*	TRUE	FALSE	FALSE	TRUE	3.51823	loop_345	300000	5.04167	9	-0.159643	-0.595019	-0.435376	0.586744	FALSE	FALSE	FALSE	4	9	6	5	7	7	5	2	9	9	9	6	3	2	5	2	2	6	3	1	5	3	5	6
chr1	39100000	39110000	10001	*	chr1	39190000	39200000	10001	*	TRUE	TRUE	FALSE	TRUE	5.0868	loop_346	100000	16.0417	37	0.425543	0.460822	0.0352782	0.336392	FALSE	FALSE	FALSE	15	19	14	19	6	8	8	11	24	27	21	15	15	15	15	11	17	14	17	5	17	17	18	37
chr1	39100000	39110000	10001	*	chr1	39250000	39260000	10001	*	TRUE	TRUE	TRUE	TRUE	7.92803	loop_347	160000	18.125	29	0.321255	0.605879	0.284624	0.144951	FALSE	FALSE	FALSE	13	16	15	14	19	13	5	15	29	26	23	25	15	13	10	11	18	21	16	21	19	21	28	29
chr1	39130000	39140000	10001	*	chr1	39180000	39190000	10001	*	FALSE	FALSE	TRUE	FALSE	3.18576	loop_348	60000	14.25	26	0.127219	0.388785	0.261566	0.522005	FALSE	FALSE	FALSE	21	13	14	20	10	8	4	8	24	24	20	14	9	7	11	7	14	11	9	12	16	20	20	26
chr1	39190000	39200000	10001	*	chr1	39250000	39260000	10001	*	TRUE	TRUE	TRUE	TRUE	3.3684	loop_349	70000	20.5417	45	0.180159	-0.100125	-0.280284	0.626282	FALSE	FALSE	FALSE	24	26	25	21	18	11	17	12	29	45	22	34	15	17	16	13	17	13	14	13	26	13	25	27
chr1	39190000	39200000	10001	*	chr1	39400000	39410000	10001	*	FALSE	TRUE	FALSE	TRUE	2.39009	loop_350	220000	4.75	9	0.207854	-0.169481	-0.377335	0.812538	FALSE	FALSE	FALSE	5	6	9	4	1	5	3	3	9	6	7	7	8	2	4	2	2	3	5	2	7	4	6	4
chr1	39320000	39330000	10001	*	chr1	39460000	39470000	10001	*	TRUE	FALSE	FALSE	FALSE	2.25404	loop_351	150000	6.5	11	-0.526033	0.173071	0.699104	0.364825	FALSE	FALSE	FALSE	10	11	8	11	2	4	4	5	6	10	8	5	1	2	4	5	9	5	2	7	10	9	10	8
chr1	39330000	39340000	10001	*	chr1	39530000	39540000	10001	*	FALSE	FALSE	FALSE	TRUE	2.09767	loop_352	210000	4.83333	9	0.576345	0.64507	0.0687245	0.513219	FALSE	FALSE	FALSE	5	4	3	3	5	2	2	3	6	2	6	8	3	6	5	7	4	6	5	3	5	9	5	9
chr1	39600000	39610000	10001	*	chr1	39650000	39660000	10001	*	TRUE	TRUE	FALSE	TRUE	2.52999	loop_353	60000	15.25	27	-0.0615697	-0.181606	-0.120036	0.866146	FALSE	FALSE	FALSE	19	18	16	23	6	15	16	11	19	27	16	16	13	17	11	9	14	5	17	9	18	15	14	22
chr1	39600000	39610000	10001	*	chr1	39710000	39720000	10001	*	TRUE	TRUE	TRUE	TRUE	4.06573	loop_354	120000	10.9167	18	-0.111152	-0.0329145	0.0782375	0.957248	FALSE	FALSE	FALSE	12	14	11	11	6	11	10	11	18	13	13	10	8	5	7	12	9	10	6	8	11	17	14	15
chr1	39810000	39820000	10001	*	chr1	39910000	39920000	10001	*	TRUE	TRUE	TRUE	TRUE	4.35925	loop_355	110000	7.375	12	-0.487315	-0.74697	-0.259656	0.247477	FALSE	FALSE	FALSE	12	10	10	9	9	9	6	8	8	6	9	6	6	7	11	3	5	4	5	4	10	8	2	10
chr1	39810000	39820000	10001	*	chr1	39970000	39980000	10001	*	TRUE	TRUE	TRUE	TRUE	5.09455	loop_356	170000	10.7083	18	-0.196642	-0.249367	-0.0527245	0.810111	FALSE	FALSE	FALSE	13	7	15	9	12	10	9	14	9	15	10	12	15	7	5	10	9	1	11	9	18	8	17	12
chr1	39810000	39820000	10001	*	chr1	40030000	40040000	10001	*	FALSE	TRUE	TRUE	TRUE	4.82251	loop_357	230000	7.75	14	0.206869	0.26682	0.0599507	0.837498	FALSE	FALSE	FALSE	8	8	8	9	2	3	9	6	10	6	12	13	5	6	9	5	4	8	7	5	13	7	14	9
chr1	39910000	39920000	10001	*	chr1	39970000	39980000	10001	*	TRUE	TRUE	TRUE	TRUE	3.4431	loop_358	70000	18.3333	30	-0.121725	-0.0503921	0.0713329	0.918965	FALSE	FALSE	FALSE	22	21	16	21	13	19	19	14	30	24	21	17	17	16	10	11	17	15	17	10	23	26	21	20
chr1	39920000	39930000	10001	*	chr1	40030000	40040000	10001	*	TRUE	TRUE	TRUE	TRUE	4.54778	loop_359	120000	11.2917	25	-0.0569821	0.292478	0.34946	0.680993	FALSE	FALSE	FALSE	15	8	25	5	7	15	3	5	14	12	20	11	5	14	5	5	9	15	6	10	18	16	14	14
chr1	39970000	39980000	10001	*	chr1	40030000	40040000	10001	*	FALSE	FALSE	FALSE	TRUE	2.56663	loop_360	70000	13.8333	21	-0.0714264	0.0588841	0.130311	0.931519	FALSE	FALSE	FALSE	11	19	15	20	9	8	15	10	19	19	15	21	8	8	14	7	13	9	16	10	19	14	15	18
chr1	40080000	40090000	10001	*	chr1	40330000	40340000	10001	*	FALSE	FALSE	TRUE	TRUE	4.09441	loop_361	260000	8.625	14	-0.376688	0.42369	0.800378	0.165841	FALSE	FALSE	FALSE	9	8	13	13	5	6	5	6	9	6	10	9	2	5	10	3	4	14	10	8	12	12	14	14
chr1	40080000	40090000	10001	*	chr1	40400000	40410000	10001	*	FALSE	FALSE	TRUE	FALSE	2.56182	loop_362	330000	6.95833	14	0.19746	0.2541	0.0566395	0.870658	FALSE	FALSE	FALSE	7	7	13	7	2	7	4	2	9	14	9	12	4	1	9	3	6	6	4	5	9	10	7	10
chr1	40140000	40150000	10001	*	chr1	40400000	40410000	10001	*	TRUE	TRUE	TRUE	TRUE	3.68434	loop_363	270000	11.5	25	0.0945395	-0.498906	-0.593446	0.264879	FALSE	FALSE	FALSE	22	12	14	18	8	6	7	9	19	14	25	12	9	10	10	11	4	6	7	7	16	9	14	7
chr1	40150000	40160000	10001	*	chr1	40330000	40340000	10001	*	TRUE	TRUE	TRUE	TRUE	4.24708	loop_364	190000	13.2917	27	-0.239672	-0.0274051	0.212267	0.787292	FALSE	FALSE	FALSE	23	23	20	16	4	10	6	9	27	18	10	12	8	13	10	3	5	10	12	11	24	16	18	11
chr1	40330000	40340000	10001	*	chr1	40400000	40410000	10001	*	FALSE	TRUE	TRUE	TRUE	2.89178	loop_365	80000	9.79167	18	-0.257527	0.0816288	0.339156	0.706283	FALSE	FALSE	FALSE	12	17	13	18	6	6	5	4	13	12	9	13	11	6	7	1	6	8	10	12	12	11	12	11
chr1	40460000	40470000	10001	*	chr1	40490000	40500000	10001	*	FALSE	TRUE	FALSE	TRUE	2.40236	loop_366	40000	13.125	23	0.322134	0.225265	-0.0968687	0.661024	FALSE	FALSE	FALSE	13	14	11	18	5	11	8	8	21	23	20	21	13	9	7	6	7	6	9	11	19	20	19	16
chr1	40600000	40610000	10001	*	chr1	40950000	40960000	10001	*	TRUE	TRUE	TRUE	TRUE	4.34411	loop_367	360000	3.25	10	-0.0523301	0.667492	0.719822	0.518975	FALSE	FALSE	FALSE	2	3	2	6	3	1	3	1	4	6	4	3	1	1	2	1	2	3	1	6	4	5	4	10
chr1	40610000	40620000	10001	*	chr1	40840000	40850000	10001	*	TRUE	TRUE	TRUE	TRUE	3.22123	loop_368	240000	5.25	11	0.301568	0.190013	-0.111555	0.873398	FALSE	FALSE	FALSE	3	8	10	6	2	4	2	1	6	11	8	6	1	3	7	5	2	5	1	1	10	10	9	5
chr1	40610000	40620000	10001	*	chr1	40670000	40680000	10001	*	TRUE	FALSE	TRUE	TRUE	3.11386	loop_369	70000	11	19	0.170218	0.350954	0.180736	0.712318	FALSE	FALSE	FALSE	15	17	14	11	2	5	7	6	18	11	10	15	10	14	8	4	9	3	12	16	10	15	13	19
chr1	40610000	40620000	10001	*	chr1	40770000	40780000	10001	*	TRUE	TRUE	TRUE	TRUE	3.18132	loop_370	170000	5.5	11	-0.0406912	0.31921	0.359901	0.772212	FALSE	FALSE	FALSE	5	4	8	5	5	1	5	6	8	7	10	4	3	4	2	4	5	6	7	2	8	11	6	6
chr1	40770000	40780000	10001	*	chr1	40840000	40850000	10001	*	TRUE	FALSE	FALSE	TRUE	3.12836	loop_371	80000	9.83333	19	0.368766	-0.19658	-0.565346	0.418724	FALSE	FALSE	FALSE	7	10	2	14	8	4	16	9	13	18	19	16	11	9	5	9	9	6	8	4	13	9	9	8
chr1	40770000	40780000	10001	*	chr1	40950000	40960000	10001	*	FALSE	TRUE	TRUE	TRUE	3.91326	loop_372	190000	7.04167	15	0.184065	0.239608	0.0555429	0.878711	FALSE	FALSE	FALSE	8	6	6	8	5	8	4	3	15	11	7	5	5	7	8	2	6	5	5	5	14	7	7	12
chr1	40840000	40850000	10001	*	chr1	40950000	40960000	10001	*	TRUE	TRUE	TRUE	TRUE	9.89382	loop_373	120000	23.5	37	-0.0587371	-0.277724	-0.218987	0.585036	FALSE	FALSE	FALSE	28	31	34	36	16	16	11	24	33	35	37	29	22	19	16	12	23	14	6	20	29	22	28	23
chr1	40890000	40900000	10001	*	chr1	40940000	40950000	10001	*	FALSE	FALSE	FALSE	TRUE	1.83274	loop_374	60000	11.5833	21	0.0513328	0.00193452	-0.0493982	0.987748	FALSE	FALSE	FALSE	11	21	15	9	8	11	6	7	21	12	15	16	8	9	13	4	7	8	7	8	14	19	17	12
chr1	41030000	41040000	10001	*	chr1	41410000	41420000	10001	*	TRUE	FALSE	FALSE	FALSE	3.39331	loop_375	390000	1.91667	7	-0.880939	-1.95217	-1.07123	0.135652	FALSE	FALSE	FALSE	3	3	2	1	3	4	1	7	4	1	3	0	2	4	0	0	0	0	1	0	3	0	1	3
chr1	41040000	41050000	10001	*	chr1	41110000	41120000	10001	*	FALSE	FALSE	TRUE	FALSE	2.04624	loop_376	80000	6.625	15	0.0387351	0.761687	0.722952	0.2008	FALSE	FALSE	FALSE	4	9	5	10	3	7	2	2	5	10	8	6	5	5	3	4	7	9	10	3	15	8	7	12
chr1	41120000	41130000	10001	*	chr1	41230000	41240000	10001	*	TRUE	FALSE	FALSE	FALSE	2.36563	loop_377	120000	6.16667	13	-0.560388	-0.616465	-0.056077	0.402566	FALSE	FALSE	FALSE	13	9	13	7	7	8	3	2	11	9	9	4	1	2	5	5	4	4	3	5	11	5	6	2
chr1	41270000	41280000	10001	*	chr1	41430000	41440000	10001	*	TRUE	TRUE	TRUE	TRUE	6.00256	loop_378	170000	10.2083	23	-0.143352	-0.668612	-0.525261	0.234097	FALSE	FALSE	FALSE	23	13	6	13	9	7	11	10	15	13	15	11	7	10	9	9	7	4	4	3	14	13	9	10
chr1	41320000	41330000	10001	*	chr1	41410000	41420000	10001	*	FALSE	FALSE	TRUE	FALSE	3.71561	loop_379	100000	12.5833	25	0.122845	0.130988	0.00814233	0.930717	FALSE	FALSE	FALSE	10	11	8	18	10	5	12	16	21	13	25	10	10	9	11	7	9	9	7	15	11	12	19	24
chr1	41570000	41580000	10001	*	chr1	41790000	41800000	10001	*	TRUE	TRUE	TRUE	TRUE	4.68412	loop_380	230000	13.875	27	-0.0949788	-0.963439	-0.86846	0.00659981	FALSE	TRUE	TRUE	27	18	18	14	17	12	10	13	25	15	20	21	11	15	15	8	4	7	3	3	18	11	12	16
chr1	41570000	41580000	10001	*	chr1	42030000	42040000	10001	*	TRUE	TRUE	TRUE	TRUE	3.16886	loop_381	470000	4.79167	10	0.664718	0.806316	0.141598	0.378054	FALSE	FALSE	FALSE	5	3	3	4	2	3	3	2	5	9	7	6	8	1	5	2	8	2	3	4	10	8	4	8
chr1	41570000	41580000	10001	*	chr1	42150000	42160000	10001	*	FALSE	FALSE	TRUE	TRUE	3.42908	loop_382	590000	3.04167	10	0.483415	1.05836	0.574946	0.38755	FALSE	FALSE	FALSE	4	1	0	3	3	2	1	1	4	4	5	2	4	2	1	1	3	3	2	1	2	8	10	6
chr1	41810000	41820000	10001	*	chr1	41910000	41920000	10001	*	TRUE	FALSE	FALSE	FALSE	2.38093	loop_383	110000	7.54167	13	-0.147168	-0.390492	-0.243324	0.738048	FALSE	FALSE	FALSE	10	10	13	6	10	8	3	4	9	11	9	11	1	3	11	8	5	1	4	5	9	9	8	13
chr1	41810000	41820000	10001	*	chr1	42030000	42040000	10001	*	TRUE	TRUE	TRUE	TRUE	2.83553	loop_384	230000	6.625	14	0.253722	0.527371	0.273649	0.617013	FALSE	FALSE	FALSE	8	3	11	10	1	4	2	4	10	12	8	14	3	3	4	2	2	5	4	7	14	10	10	8
chr1	41910000	41920000	10001	*	chr1	42030000	42040000	10001	*	FALSE	FALSE	TRUE	FALSE	3.48144	loop_385	130000	8.54167	14	-0.00674063	0.403107	0.409847	0.554498	FALSE	FALSE	FALSE	10	6	9	12	4	8	6	5	10	13	11	10	3	9	2	7	6	8	10	11	14	8	9	14
chr1	42140000	42150000	10001	*	chr1	42570000	42580000	10001	*	FALSE	FALSE	TRUE	TRUE	2.3799	loop_386	440000	3.08333	6	-0.175127	-0.00336411	0.171763	0.964006	FALSE	FALSE	FALSE	5	3	3	4	4	2	2	1	6	0	4	3	2	4	3	1	1	0	2	4	6	5	5	4
chr1	42140000	42150000	10001	*	chr1	42740000	42750000	10001	*	FALSE	FALSE	TRUE	TRUE	3.75314	loop_387	610000	3.16667	9	-0.688195	0.85715	1.54535	0.0927233	FALSE	FALSE	FALSE	7	3	3	0	2	2	3	1	2	2	2	3	2	1	0	2	1	5	3	4	7	9	4	8
chr1	42150000	42160000	10001	*	chr1	42660000	42670000	10001	*	FALSE	TRUE	FALSE	TRUE	2.68368	loop_388	520000	3.04167	7	0.29069	0.531398	0.240708	0.805876	FALSE	FALSE	FALSE	4	2	2	6	3	0	1	1	7	6	2	1	3	1	5	0	2	1	0	4	5	5	7	5
chr1	42170000	42180000	10001	*	chr1	42450000	42460000	10001	*	FALSE	FALSE	TRUE	TRUE	2.74114	loop_389	290000	4.66667	10	0.0190857	0.256761	0.237675	0.888513	FALSE	FALSE	FALSE	4	7	3	5	4	4	1	5	6	7	4	7	2	5	2	3	2	1	5	4	9	5	7	10
chr1	42170000	42180000	10001	*	chr1	42330000	42340000	10001	*	TRUE	TRUE	TRUE	TRUE	3.68438	loop_390	170000	10.0417	21	-0.316156	-0.295246	0.0209093	0.714789	FALSE	FALSE	FALSE	20	14	15	12	5	11	6	6	16	13	10	21	3	9	6	1	6	4	4	10	18	7	10	14
chr1	42180000	42190000	10001	*	chr1	42480000	42490000	10001	*	FALSE	FALSE	TRUE	FALSE	2.477	loop_391	310000	2.70833	8	-1.14352	0.895602	2.03912	0.0533149	FALSE	FALSE	FALSE	4	5	7	1	1	0	2	0	5	0	2	1	0	0	2	0	3	1	4	1	8	4	7	7
chr1	42200000	42210000	10001	*	chr1	42320000	42330000	10001	*	FALSE	FALSE	TRUE	FALSE	2.71089	loop_392	130000	6.25	16	0.141523	0.352988	0.211466	0.840211	FALSE	FALSE	FALSE	11	5	12	4	1	6	1	2	6	10	9	9	3	8	1	4	3	4	1	3	6	12	13	16
chr1	42340000	42350000	10001	*	chr1	42650000	42660000	10001	*	TRUE	FALSE	FALSE	TRUE	3.21152	loop_393	320000	4.41667	10	-0.404908	-1.21088	-0.805971	0.16798	FALSE	FALSE	FALSE	8	8	6	7	2	5	7	3	5	10	3	8	1	3	7	1	0	1	0	2	5	3	5	6
chr1	42340000	42350000	10001	*	chr1	42750000	42760000	10001	*	TRUE	FALSE	FALSE	TRUE	2.90652	loop_394	420000	3.125	9	0.388355	-0.353669	-0.742024	0.612967	FALSE	FALSE	FALSE	1	3	9	2	2	2	0	4	7	4	4	5	3	4	2	3	1	2	1	0	4	3	4	5
chr1	42390000	42400000	10001	*	chr1	42560000	42570000	10001	*	TRUE	FALSE	FALSE	FALSE	2.87929	loop_395	180000	3.66667	13	-0.528505	-0.745161	-0.216655	0.573307	FALSE	FALSE	FALSE	6	13	6	6	0	3	0	5	8	3	3	6	1	3	1	3	1	2	0	6	6	1	3	2
chr1	42510000	42520000	10001	*	chr1	42750000	42760000	10001	*	FALSE	FALSE	TRUE	FALSE	3.26677	loop_396	250000	2.5	9	-0.191354	1.3289	1.52025	0.161678	FALSE	FALSE	FALSE	0	1	1	3	3	1	0	4	2	6	2	0	0	1	0	1	1	1	4	9	4	1	8	7
chr1	42540000	42550000	10001	*	chr1	43090000	43100000	10001	*	FALSE	FALSE	TRUE	FALSE	3.98452	loop_397	560000	1.33333	6	-1.18713	1.59896	2.78609	0.0304341	FALSE	FALSE	FALSE	2	1	1	1	1	1	0	0	2	0	0	0	0	0	1	0	2	1	2	3	4	1	6	3
chr1	42570000	42580000	10001	*	chr1	42740000	42750000	10001	*	TRUE	TRUE	TRUE	TRUE	5.27196	loop_398	180000	6.33333	16	-1.1606	-0.310954	0.849648	0.0696266	FALSE	FALSE	FALSE	16	9	11	9	3	7	5	5	7	7	1	1	5	3	3	4	3	6	3	5	11	6	9	13
chr1	42570000	42580000	10001	*	chr1	43070000	43080000	10001	*	FALSE	FALSE	FALSE	TRUE	3.25494	loop_399	510000	2.29167	7	-0.804667	-0.2394	0.565267	0.649438	FALSE	FALSE	FALSE	5	7	2	2	1	2	0	3	2	1	3	1	2	1	1	2	1	1	2	1	6	4	3	2
chr1	42770000	42780000	10001	*	chr1	43070000	43080000	10001	*	TRUE	TRUE	TRUE	TRUE	5.10346	loop_400	310000	7.66667	17	-0.357936	0.19427	0.552205	0.5063	FALSE	FALSE	FALSE	10	8	12	11	5	8	3	3	11	4	9	8	3	5	5	5	6	6	3	5	14	17	8	15
chr1	42790000	42800000	10001	*	chr1	42890000	42900000	10001	*	FALSE	FALSE	FALSE	TRUE	3.01861	loop_401	110000	6.54167	16	-0.374551	0.102773	0.477324	0.634236	FALSE	FALSE	FALSE	10	5	6	11	5	3	8	4	4	7	7	8	7	4	4	2	4	5	6	2	10	13	6	16
chr1	42910000	42920000	10001	*	chr1	43070000	43080000	10001	*	TRUE	TRUE	TRUE	TRUE	8.7855	loop_402	170000	24.9583	46	-0.0928095	-0.221676	-0.128867	0.709511	FALSE	FALSE	FALSE	32	33	34	29	19	23	17	18	39	46	28	35	18	16	17	12	15	11	20	15	35	26	29	32
chr1	42920000	42930000	10001	*	chr1	42950000	42960000	10001	*	FALSE	FALSE	TRUE	FALSE	2.13481	loop_403	40000	13.2083	24	0.411672	0.358436	-0.0532354	0.486372	FALSE	FALSE	FALSE	14	10	12	8	6	13	8	11	20	24	21	13	5	11	14	11	11	5	6	13	21	16	21	23
chr1	42960000	42970000	10001	*	chr1	43070000	43080000	10001	*	FALSE	FALSE	FALSE	TRUE	2.40993	loop_404	120000	8.91667	20	0.159859	0.274066	0.114207	0.833429	FALSE	FALSE	FALSE	8	9	7	11	8	8	4	6	8	11	20	11	7	8	6	3	9	3	3	12	16	15	9	12
chr1	43220000	43230000	10001	*	chr1	43410000	43420000	10001	*	TRUE	TRUE	TRUE	TRUE	5.2745	loop_405	200000	12.25	22	0.00495946	-0.249047	-0.254007	0.750162	FALSE	FALSE	FALSE	11	13	13	8	10	19	8	15	22	19	11	15	13	10	8	8	6	7	7	10	18	17	15	11
chr1	43230000	43240000	10001	*	chr1	43650000	43660000	10001	*	FALSE	TRUE	TRUE	TRUE	2.95794	loop_406	430000	2.25	7	1.20657	0.901524	-0.305047	0.394889	FALSE	FALSE	FALSE	3	1	2	1	1	2	0	0	7	5	2	3	2	2	1	3	2	1	1	3	6	1	4	1
chr1	43520000	43530000	10001	*	chr1	43650000	43660000	10001	*	TRUE	TRUE	TRUE	TRUE	3.80178	loop_407	140000	7.16667	12	0.138925	0.13303	-0.00589588	0.950732	FALSE	FALSE	FALSE	8	8	3	9	5	6	6	7	12	6	7	6	6	10	6	8	7	7	10	7	8	5	8	7
chr1	43520000	43530000	10001	*	chr1	43930000	43940000	10001	*	TRUE	TRUE	FALSE	TRUE	3.7955	loop_408	420000	3.45833	6	-0.448242	-0.511729	-0.0634874	0.709021	FALSE	FALSE	FALSE	5	5	3	5	4	3	3	4	4	3	5	2	5	3	4	0	2	3	2	2	4	4	6	2
chr1	43530000	43540000	10001	*	chr1	43580000	43590000	10001	*	FALSE	FALSE	TRUE	FALSE	2.66857	loop_409	60000	8.75	19	0.134134	0.563035	0.428901	0.372875	FALSE	FALSE	FALSE	5	9	5	8	6	8	8	6	6	14	10	5	7	7	9	7	7	8	10	7	16	12	11	19
chr1	43760000	43770000	10001	*	chr1	43930000	43940000	10001	*	TRUE	TRUE	TRUE	TRUE	7.42265	loop_410	180000	19.1667	33	0.141452	0.257513	0.11606	0.714605	FALSE	FALSE	FALSE	31	15	15	13	14	22	9	13	32	24	26	26	11	16	14	10	15	13	13	15	31	21	33	28
chr1	43760000	43770000	10001	*	chr1	44030000	44040000	10001	*	FALSE	FALSE	FALSE	TRUE	2.85567	loop_411	280000	3.95833	11	0.524042	0.609587	0.0855446	0.64388	FALSE	FALSE	FALSE	4	3	1	3	4	2	1	4	1	6	8	1	6	4	5	3	5	4	1	3	7	11	5	3
chr1	43770000	43780000	10001	*	chr1	43830000	43840000	10001	*	TRUE	FALSE	TRUE	TRUE	2.08474	loop_412	70000	9.5	18	-0.404232	0.0971072	0.50134	0.474693	FALSE	FALSE	FALSE	13	14	11	12	9	8	6	5	4	15	15	10	2	8	8	3	7	6	12	8	18	10	10	14
chr1	44000000	44010000	10001	*	chr1	44040000	44050000	10001	*	TRUE	TRUE	FALSE	TRUE	4.09607	loop_413	50000	15.2083	27	-0.144024	-0.27709	-0.133066	0.719733	FALSE	FALSE	FALSE	20	14	10	23	16	15	8	22	27	18	11	22	10	9	10	18	10	10	11	13	21	18	15	14
chr1	44100000	44110000	10001	*	chr1	44190000	44200000	10001	*	TRUE	FALSE	FALSE	FALSE	2.97594	loop_414	100000	5.41667	13	-0.525567	-0.354358	0.171209	0.626473	FALSE	FALSE	FALSE	10	13	5	8	2	3	4	6	3	4	6	8	5	4	2	5	1	6	3	2	9	7	7	7
chr1	44210000	44220000	10001	*	chr1	44590000	44600000	10001	*	TRUE	TRUE	TRUE	TRUE	4.58361	loop_415	390000	7.29167	15	0.0698243	0.429761	0.359937	0.630171	FALSE	FALSE	FALSE	7	3	6	6	6	6	9	5	7	12	12	10	1	5	4	5	4	6	10	4	15	8	14	10
chr1	44210000	44220000	10001	*	chr1	44650000	44660000	10001	*	FALSE	TRUE	FALSE	FALSE	3.47676	loop_416	450000	4.45833	14	1.0154	0.38951	-0.625893	0.269054	FALSE	FALSE	FALSE	6	2	3	0	2	5	3	2	14	5	6	8	1	6	6	4	1	6	0	2	5	7	6	7
chr1	44220000	44230000	10001	*	chr1	44360000	44370000	10001	*	FALSE	TRUE	TRUE	FALSE	2.47476	loop_417	150000	4.66667	12	0.373867	0.198519	-0.175349	0.830858	FALSE	FALSE	FALSE	4	3	2	3	5	7	4	2	12	8	9	4	1	4	5	1	3	5	3	1	7	8	5	6
chr1	44370000	44380000	10001	*	chr1	44500000	44510000	10001	*	TRUE	FALSE	FALSE	FALSE	2.67653	loop_418	140000	6.25	13	-0.722986	-0.78291	-0.059924	0.198536	FALSE	FALSE	FALSE	13	8	6	9	8	7	10	5	7	8	3	10	4	4	3	5	6	4	6	4	5	8	2	5
chr1	44370000	44380000	10001	*	chr1	44590000	44600000	10001	*	TRUE	TRUE	TRUE	TRUE	5.01054	loop_419	230000	14.5833	28	-0.109007	-1.01747	-0.908462	0.00287027	FALSE	TRUE	TRUE	18	18	24	21	13	12	12	21	28	24	20	22	8	9	16	14	8	8	11	9	6	5	13	10
chr1	44730000	44740000	10001	*	chr1	44770000	44780000	10001	*	TRUE	TRUE	TRUE	TRUE	2.06388	loop_420	50000	9.54167	17	-0.40203	-0.250374	0.151655	0.612964	FALSE	FALSE	FALSE	9	8	14	10	8	9	16	9	10	11	13	12	7	4	5	6	4	6	9	4	17	12	15	11
chr1	44780000	44790000	10001	*	chr1	45300000	45310000	10001	*	FALSE	FALSE	TRUE	TRUE	2.83579	loop_421	530000	2.875	6	0.0327659	0.0215362	-0.0112297	0.998953	FALSE	FALSE	FALSE	1	3	5	3	2	2	4	2	3	2	3	5	1	6	3	1	6	3	1	1	1	4	4	3
chr1	44790000	44800000	10001	*	chr1	45000000	45010000	10001	*	FALSE	FALSE	TRUE	TRUE	3.04463	loop_422	220000	4.375	9	0.101515	-0.704335	-0.80585	0.399146	FALSE	FALSE	FALSE	7	4	2	8	4	4	4	4	9	5	6	9	4	5	2	3	4	1	0	1	4	4	7	4
chr1	44830000	44840000	10001	*	chr1	45000000	45010000	10001	*	TRUE	TRUE	TRUE	TRUE	3.7335	loop_423	180000	7.70833	12	-0.2536	-0.0995078	0.154092	0.870658	FALSE	FALSE	FALSE	10	5	11	7	11	7	6	7	11	9	10	10	7	5	2	6	3	10	12	8	8	8	4	8
chr1	44830000	44840000	10001	*	chr1	45300000	45310000	10001	*	TRUE	TRUE	TRUE	TRUE	3.94026	loop_424	480000	4.25	13	0.702314	-0.0655524	-0.767866	0.375771	FALSE	FALSE	FALSE	1	6	6	2	1	2	4	5	13	3	7	8	5	4	4	4	2	1	5	5	4	2	5	3
chr1	44830000	44840000	10001	*	chr1	45490000	45500000	10001	*	TRUE	FALSE	FALSE	FALSE	3.36006	loop_425	670000	2.08333	5	-0.58158	-0.43302	0.14856	0.795764	FALSE	FALSE	FALSE	3	1	2	5	3	4	0	2	1	3	2	4	1	3	0	1	1	2	4	1	0	1	3	3
chr1	44890000	44900000	10001	*	chr1	44970000	44980000	10001	*	FALSE	FALSE	TRUE	FALSE	2.30518	loop_426	90000	6.95833	21	-0.325547	0.260208	0.585755	0.498354	FALSE	FALSE	FALSE	8	7	10	6	5	6	3	6	9	6	6	3	5	6	3	6	4	9	2	2	21	11	11	12
chr1	45010000	45020000	10001	*	chr1	45300000	45310000	10001	*	TRUE	TRUE	TRUE	TRUE	9.50691	loop_427	300000	16.0833	24	0.0604589	-0.18175	-0.242209	0.737552	FALSE	FALSE	FALSE	18	14	22	16	14	12	14	15	24	23	18	22	13	16	13	12	8	10	12	11	21	18	18	22
chr1	45010000	45020000	10001	*	chr1	45490000	45500000	10001	*	TRUE	TRUE	TRUE	TRUE	5.11545	loop_428	490000	6.08333	12	-0.0745022	0.344287	0.418789	0.709741	FALSE	FALSE	FALSE	8	3	12	3	2	5	3	7	4	10	7	5	2	7	4	5	8	5	2	4	9	8	12	11
chr1	45020000	45030000	10001	*	chr1	45220000	45230000	10001	*	FALSE	FALSE	TRUE	TRUE	2.5489	loop_429	210000	5.33333	15	0.489027	0.632313	0.143286	0.554313	FALSE	FALSE	FALSE	6	4	5	6	1	4	3	1	4	10	9	8	1	4	7	3	1	2	4	3	12	6	9	15
chr1	45350000	45360000	10001	*	chr1	45490000	45500000	10001	*	TRUE	TRUE	TRUE	TRUE	6.29122	loop_430	150000	12.7083	26	-0.0558266	-0.356861	-0.301034	0.627738	FALSE	FALSE	FALSE	22	18	9	24	11	6	8	9	26	20	11	17	16	11	1	10	7	5	8	5	17	18	15	11
chr1	45350000	45360000	10001	*	chr1	45570000	45580000	10001	*	TRUE	TRUE	FALSE	TRUE	5.12205	loop_431	230000	5.45833	12	0.00187326	0.156388	0.154515	0.949351	FALSE	FALSE	FALSE	6	7	8	7	2	6	1	3	10	7	4	5	4	3	4	6	5	1	3	5	12	6	9	7
chr1	45510000	45520000	10001	*	chr1	45570000	45580000	10001	*	TRUE	TRUE	TRUE	TRUE	4.51861	loop_432	70000	13.9167	22	-0.456191	-0.295642	0.160549	0.379614	FALSE	FALSE	FALSE	13	18	22	18	15	15	11	12	22	11	13	12	8	10	14	8	10	8	10	7	20	16	21	20
chr1	45630000	45640000	10001	*	chr1	46210000	46220000	10001	*	FALSE	FALSE	TRUE	FALSE	2.74234	loop_433	590000	2.125	6	0.188233	0.861453	0.673221	0.599941	FALSE	FALSE	FALSE	1	2	3	1	2	1	2	0	3	2	5	2	1	2	0	0	0	1	5	0	4	5	6	3
chr1	45670000	45680000	10001	*	chr1	46210000	46220000	10001	*	TRUE	FALSE	FALSE	TRUE	3.02526	loop_434	550000	1.66667	4	-1.18921	-0.360136	0.829079	0.504633	FALSE	FALSE	FALSE	3	1	2	2	4	3	1	1	1	0	1	2	2	2	0	0	2	2	1	0	2	4	2	2
chr1	45680000	45690000	10001	*	chr1	45880000	45890000	10001	*	TRUE	TRUE	TRUE	TRUE	3.1706	loop_435	210000	5.5	15	0.401512	0.723373	0.321861	0.46502	FALSE	FALSE	FALSE	9	4	3	7	2	2	3	2	7	5	10	15	3	1	3	3	4	1	5	5	10	10	7	11
chr1	46030000	46040000	10001	*	chr1	46130000	46140000	10001	*	TRUE	FALSE	FALSE	FALSE	3.71429	loop_436	110000	9.41667	22	-0.406527	-0.388297	0.0182296	0.53109	FALSE	FALSE	FALSE	13	16	15	11	8	8	6	9	22	9	10	8	6	5	8	4	8	5	7	5	12	12	11	8
chr1	46030000	46040000	10001	*	chr1	46170000	46180000	10001	*	TRUE	TRUE	TRUE	TRUE	8.6754	loop_437	150000	21.3333	40	0.103071	-0.707289	-0.81036	0.00423507	FALSE	TRUE	TRUE	29	17	22	33	20	19	19	22	40	40	31	30	22	15	25	10	12	10	11	12	20	15	14	24
chr1	46030000	46040000	10001	*	chr1	46220000	46230000	10001	*	FALSE	FALSE	TRUE	TRUE	4.80328	loop_438	200000	10.125	17	-0.162884	0.131402	0.294286	0.771657	FALSE	FALSE	FALSE	12	10	7	9	6	11	8	14	10	10	8	11	12	7	10	6	11	12	9	6	17	9	13	15
chr1	46180000	46190000	10001	*	chr1	46220000	46230000	10001	*	TRUE	FALSE	FALSE	FALSE	2.87681	loop_439	50000	14.5	30	-0.33978	-0.0778489	0.261931	0.593945	FALSE	FALSE	FALSE	19	12	17	16	16	15	13	12	24	11	16	20	12	5	9	8	10	11	15	8	17	15	17	30
chr1	46270000	46280000	10001	*	chr1	46340000	46350000	10001	*	FALSE	FALSE	TRUE	FALSE	2.37772	loop_440	80000	7.125	15	-0.112867	0.178342	0.291209	0.839524	FALSE	FALSE	FALSE	11	5	2	9	6	6	5	9	8	6	10	4	6	3	10	5	6	6	4	8	6	13	8	15
chr1	46300000	46310000	10001	*	chr1	46340000	46350000	10001	*	TRUE	TRUE	FALSE	TRUE	2.45639	loop_441	50000	12.5	27	-0.0820598	-0.550276	-0.468216	0.309945	FALSE	FALSE	FALSE	15	15	6	21	11	17	12	11	25	27	15	12	9	11	10	4	5	8	6	9	14	11	8	18
chr1	46440000	46450000	10001	*	chr1	46720000	46730000	10001	*	FALSE	FALSE	TRUE	TRUE	3.27468	loop_442	290000	3.95833	12	1.3632	0.91207	-0.451133	0.118172	FALSE	FALSE	FALSE	4	1	2	3	2	0	1	4	4	12	8	5	6	3	4	4	5	3	4	4	3	3	3	7
chr1	46470000	46480000	10001	*	chr1	46520000	46530000	10001	*	TRUE	TRUE	TRUE	TRUE	4.23285	loop_443	60000	27.6667	44	-0.0144884	-0.363652	-0.349163	0.270342	FALSE	FALSE	FALSE	36	39	25	26	24	41	19	20	42	44	32	39	22	20	20	27	23	19	17	18	31	36	24	20
chr1	46620000	46630000	10001	*	chr1	46710000	46720000	10001	*	FALSE	FALSE	TRUE	FALSE	2.76955	loop_444	100000	8.16667	20	0.267476	0.512439	0.244963	0.574593	FALSE	FALSE	FALSE	4	10	6	11	3	4	6	8	7	20	14	6	9	2	5	6	8	9	13	3	12	10	8	12
chr1	46740000	46750000	10001	*	chr1	46860000	46870000	10001	*	TRUE	FALSE	TRUE	TRUE	3.36803	loop_445	130000	7.70833	15	-0.168821	0.285866	0.454687	0.604673	FALSE	FALSE	FALSE	7	9	8	11	3	4	5	10	10	9	12	6	4	4	5	5	6	5	8	7	15	6	15	11
chr1	46740000	46750000	10001	*	chr1	46990000	47000000	10001	*	TRUE	FALSE	TRUE	TRUE	3.66416	loop_446	260000	6	15	-0.55245	-0.547749	0.00470113	0.445897	FALSE	FALSE	FALSE	6	5	7	15	5	7	5	8	8	5	4	6	7	3	6	3	4	2	4	5	9	5	6	9
chr1	46740000	46750000	10001	*	chr1	47170000	47180000	10001	*	FALSE	FALSE	FALSE	TRUE	2.94352	loop_447	440000	3.95833	8	-0.0166374	0.14251	0.159147	0.963063	FALSE	FALSE	FALSE	5	3	5	4	2	4	1	5	7	2	5	3	4	3	2	5	6	3	3	3	8	1	3	8
chr1	47100000	47110000	10001	*	chr1	47170000	47180000	10001	*	FALSE	FALSE	TRUE	TRUE	3.79065	loop_448	80000	6.58333	11	-0.506806	0.238895	0.745701	0.312295	FALSE	FALSE	FALSE	11	9	7	9	3	5	3	7	7	10	4	10	2	4	4	1	6	11	5	6	10	11	7	6
chr1	47190000	47200000	10001	*	chr1	47260000	47270000	10001	*	TRUE	TRUE	TRUE	TRUE	4.31734	loop_449	80000	16	31	0.156256	0.0831662	-0.07309	0.890339	FALSE	FALSE	FALSE	12	19	11	19	10	12	16	16	31	23	22	19	12	9	13	12	14	11	16	12	16	18	18	23
chr1	47190000	47200000	10001	*	chr1	47720000	47730000	10001	*	FALSE	TRUE	TRUE	TRUE	3.81831	loop_450	540000	2.20833	7	-0.0626836	0.537831	0.600515	0.759893	FALSE	FALSE	FALSE	1	3	2	3	3	2	0	1	7	2	2	3	0	0	1	2	2	5	2	2	3	0	2	5
chr1	47380000	47390000	10001	*	chr1	47420000	47430000	10001	*	FALSE	TRUE	FALSE	TRUE	2.76962	loop_451	50000	18.125	40	-0.129519	-0.600242	-0.470723	0.152265	FALSE	FALSE	FALSE	19	28	24	29	12	18	9	23	40	25	28	25	13	13	13	9	19	10	18	6	17	10	13	14
chr1	47430000	47440000	10001	*	chr1	47710000	47720000	10001	*	TRUE	TRUE	TRUE	TRUE	5.63999	loop_452	290000	16.0417	32	-0.00897747	-0.653326	-0.644349	0.0674519	FALSE	FALSE	FALSE	29	20	16	21	10	17	12	16	24	18	32	24	14	15	12	13	10	8	13	11	16	8	11	15
chr1	47430000	47440000	10001	*	chr1	47930000	47940000	10001	*	FALSE	FALSE	FALSE	TRUE	2.10292	loop_453	510000	2.95833	6	0.413699	-0.424404	-0.838103	0.544208	FALSE	FALSE	FALSE	3	5	1	2	1	4	2	4	5	6	5	3	6	1	2	3	0	3	1	2	2	4	5	1
chr1	47520000	47530000	10001	*	chr1	47710000	47720000	10001	*	TRUE	TRUE	TRUE	TRUE	4.25045	loop_454	200000	15.75	29	-0.290773	0.693135	0.983908	0.0018029	FALSE	TRUE	TRUE	12	15	17	17	10	11	10	15	12	14	15	12	11	11	9	10	26	14	20	27	29	19	23	19
chr1	47730000	47740000	10001	*	chr1	47930000	47940000	10001	*	TRUE	TRUE	TRUE	TRUE	4.50673	loop_455	210000	13.0833	28	0.699888	0.098162	-0.601726	0.0607457	FALSE	FALSE	FALSE	11	14	12	17	3	11	7	8	23	22	21	28	11	11	17	11	11	11	10	11	7	13	12	12
chr1	47730000	47740000	10001	*	chr1	48060000	48070000	10001	*	TRUE	TRUE	TRUE	TRUE	4.15819	loop_456	340000	7.75	14	0.353176	-0.36778	-0.720956	0.286027	FALSE	FALSE	FALSE	6	9	9	13	9	3	5	5	14	13	13	14	8	7	8	5	9	7	5	5	5	4	4	6
chr1	47730000	47740000	10001	*	chr1	48190000	48200000	10001	*	FALSE	FALSE	TRUE	FALSE	3.61522	loop_457	470000	2.95833	8	0.21756	1.06683	0.849266	0.285903	FALSE	FALSE	FALSE	6	2	3	3	0	1	0	2	3	2	4	2	2	2	2	3	8	2	5	2	7	3	3	4
chr1	47730000	47740000	10001	*	chr1	48230000	48240000	10001	*	TRUE	TRUE	FALSE	TRUE	4.34102	loop_458	510000	3.58333	8	0.138308	-0.868537	-1.00685	0.307978	FALSE	FALSE	FALSE	6	5	2	7	3	2	3	3	6	2	8	6	7	2	3	3	3	1	2	1	3	2	2	4
chr1	47990000	48000000	10001	*	chr1	48060000	48070000	10001	*	TRUE	TRUE	TRUE	TRUE	4.028	loop_459	80000	19.0417	35	-0.396955	-0.411733	-0.014778	0.320398	FALSE	FALSE	FALSE	19	35	23	26	19	19	13	22	24	25	28	18	20	11	13	7	11	15	18	22	12	13	17	27
chr1	47990000	48000000	10001	*	chr1	48200000	48210000	10001	*	TRUE	FALSE	TRUE	TRUE	2.96841	loop_460	220000	5.5	11	-0.757088	-0.350944	0.406144	0.391379	FALSE	FALSE	FALSE	9	6	8	8	3	6	11	3	7	7	7	5	1	3	4	2	6	8	1	7	6	4	5	5
chr1	48110000	48120000	10001	*	chr1	48200000	48210000	10001	*	TRUE	TRUE	TRUE	TRUE	5.49939	loop_461	100000	19.0417	32	-0.23814	-0.0814146	0.156726	0.737552	FALSE	FALSE	FALSE	31	32	25	26	16	9	12	11	26	32	23	15	9	13	15	14	25	18	18	13	27	18	9	20
chr1	48110000	48120000	10001	*	chr1	48490000	48500000	10001	*	TRUE	TRUE	FALSE	TRUE	4.60034	loop_462	390000	4.79167	10	0.0211899	-0.822753	-0.843943	0.343266	FALSE	FALSE	FALSE	6	3	8	6	10	2	2	5	9	9	9	7	5	5	3	1	2	2	9	0	4	2	4	2
chr1	48250000	48260000	10001	*	chr1	48490000	48500000	10001	*	TRUE	TRUE	FALSE	TRUE	2.7947	loop_463	250000	5.625	10	-0.396046	-0.384218	0.011828	0.704439	FALSE	FALSE	FALSE	7	7	8	9	4	7	5	5	5	5	10	7	6	3	5	2	5	6	4	7	8	5	1	4
chr1	48360000	48370000	10001	*	chr1	48500000	48510000	10001	*	FALSE	FALSE	FALSE	TRUE	2.46639	loop_464	150000	3.45833	6	0.343207	-0.0404781	-0.383685	0.829898	FALSE	FALSE	FALSE	1	6	4	6	2	0	3	3	6	4	4	5	0	6	6	2	3	3	1	2	2	5	3	6
chr1	48570000	48580000	10001	*	chr1	48690000	48700000	10001	*	TRUE	TRUE	TRUE	TRUE	4.03438	loop_465	130000	15.0833	31	0.768668	0.404319	-0.364348	0.0592694	FALSE	FALSE	FALSE	10	11	14	14	7	12	5	13	31	29	24	18	18	10	20	10	13	11	15	17	13	13	19	15
chr1	48570000	48580000	10001	*	chr1	48810000	48820000	10001	*	FALSE	TRUE	FALSE	TRUE	3.34074	loop_466	250000	7.66667	14	0.845307	0.567739	-0.277568	0.190623	FALSE	FALSE	FALSE	14	4	7	6	4	2	5	1	14	11	14	11	9	8	12	2	10	8	7	7	7	7	8	6
chr1	48570000	48580000	10001	*	chr1	50340000	50350000	10001	*	TRUE	TRUE	FALSE	TRUE	4.10074	loop_467	1780000	3.16667	8	0.297039	-0.339112	-0.636151	0.726024	FALSE	FALSE	FALSE	1	6	1	5	3	5	3	0	7	8	2	8	1	2	4	1	2	3	4	0	2	1	5	2
chr1	48910000	48920000	10001	*	chr1	49630000	49640000	10001	*	FALSE	FALSE	TRUE	FALSE	2.90227	loop_468	730000	3.20833	11	-0.808996	2.0922	2.9012	1.0285e-05	TRUE	TRUE	TRUE	2	0	5	3	0	2	2	0	3	2	3	0	0	0	1	0	11	4	3	7	9	5	9	6
chr1	48920000	48930000	10001	*	chr1	50340000	50350000	10001	*	TRUE	TRUE	FALSE	TRUE	3.23354	loop_469	1430000	2.75	7	0.0271723	-0.955656	-0.982828	0.423891	FALSE	FALSE	FALSE	5	5	3	3	1	3	4	1	3	5	6	7	1	3	2	1	0	2	1	1	4	3	2	0
chr1	49100000	49110000	10001	*	chr1	49620000	49630000	10001	*	FALSE	FALSE	TRUE	TRUE	2.51569	loop_470	530000	4.125	11	-1.0194	1.22863	2.24803	0.000547758	TRUE	TRUE	TRUE	5	3	3	6	0	5	2	2	2	0	3	3	2	1	3	0	11	7	6	10	10	2	7	6
chr1	50360000	50370000	10001	*	chr1	50700000	50710000	10001	*	TRUE	TRUE	TRUE	TRUE	6.5616	loop_471	350000	6.29167	14	0.199174	0.226489	0.0273145	0.90062	FALSE	FALSE	FALSE	8	5	6	14	1	4	3	4	10	6	11	10	5	2	4	7	7	6	7	1	11	2	9	8
chr1	50360000	50370000	10001	*	chr1	51180000	51190000	10001	*	FALSE	FALSE	TRUE	TRUE	4.23436	loop_472	830000	1.83333	4	-1.12719	0.662962	1.79015	0.192273	FALSE	FALSE	FALSE	4	3	3	2	0	1	0	2	1	0	0	2	2	1	1	0	2	3	2	4	3	4	3	1
chr1	50370000	50380000	10001	*	chr1	50600000	50610000	10001	*	TRUE	TRUE	TRUE	TRUE	5.07807	loop_473	240000	8.875	18	-0.596876	0.67079	1.26767	0.0129413	TRUE	TRUE	TRUE	6	13	11	11	5	8	8	3	11	10	6	3	2	6	6	3	17	8	14	17	15	7	5	18
chr1	50610000	50620000	10001	*	chr1	50700000	50710000	10001	*	TRUE	TRUE	FALSE	TRUE	3.53854	loop_474	100000	11	19	-0.00984181	-0.124627	-0.114785	0.941392	FALSE	FALSE	FALSE	14	18	10	19	6	8	9	5	16	17	16	14	4	9	14	5	5	9	10	12	9	13	8	14
chr1	50640000	50650000	10001	*	chr1	50700000	50710000	10001	*	FALSE	FALSE	TRUE	FALSE	2.35102	loop_475	70000	8.625	15	-0.158096	0.234919	0.393015	0.680432	FALSE	FALSE	FALSE	11	15	13	12	3	4	6	3	12	15	6	10	5	6	6	4	9	3	6	13	15	11	7	12
chr1	50770000	50780000	10001	*	chr1	51040000	51050000	10001	*	TRUE	TRUE	TRUE	TRUE	3.28707	loop_476	280000	5.66667	12	-0.332319	0.232733	0.565052	0.579921	FALSE	FALSE	FALSE	6	11	8	8	2	3	3	4	5	8	3	8	3	5	2	4	4	5	5	4	12	9	8	6
chr1	50770000	50780000	10001	*	chr1	51180000	51190000	10001	*	TRUE	TRUE	TRUE	TRUE	3.90491	loop_477	420000	6.29167	12	0.175464	0.0587885	-0.116675	0.942077	FALSE	FALSE	FALSE	7	6	6	6	4	8	5	3	11	11	11	5	3	10	1	4	3	5	3	6	10	6	5	12
chr1	50870000	50880000	10001	*	chr1	51040000	51050000	10001	*	TRUE	TRUE	TRUE	TRUE	2.5056	loop_478	180000	6.45833	15	0.269836	0.234505	-0.035331	0.861417	FALSE	FALSE	FALSE	7	9	9	4	6	2	3	4	6	9	12	9	7	3	6	5	2	9	2	6	15	4	10	6
chr1	50870000	50880000	10001	*	chr1	51190000	51200000	10001	*	TRUE	TRUE	TRUE	TRUE	3.97467	loop_479	330000	7.70833	16	-0.655724	-0.156607	0.499117	0.34991	FALSE	FALSE	FALSE	10	16	9	13	5	9	5	4	11	4	5	8	7	2	6	5	5	5	5	10	8	8	11	14
chr1	50920000	50930000	10001	*	chr1	51040000	51050000	10001	*	FALSE	FALSE	FALSE	TRUE	1.78938	loop_480	130000	6.58333	12	-0.0626165	-0.0424948	0.0201217	0.992119	FALSE	FALSE	FALSE	11	5	9	12	4	5	4	2	7	11	10	7	3	8	8	0	3	5	3	5	8	5	12	11
chr1	50930000	50940000	10001	*	chr1	51190000	51200000	10001	*	TRUE	TRUE	TRUE	TRUE	3.04866	loop_481	270000	7.29167	15	-0.122059	-0.327238	-0.205179	0.798703	FALSE	FALSE	FALSE	9	7	13	12	9	3	2	7	15	6	9	9	10	6	2	5	7	4	4	6	9	7	3	11
chr1	51090000	51100000	10001	*	chr1	51180000	51190000	10001	*	FALSE	FALSE	FALSE	TRUE	2.29722	loop_482	100000	7.875	14	-0.37155	0.0952496	0.4668	0.617481	FALSE	FALSE	FALSE	12	12	12	8	7	8	3	4	14	3	5	6	3	7	9	6	4	13	7	11	12	9	5	9
chr1	51220000	51230000	10001	*	chr1	51280000	51290000	10001	*	FALSE	FALSE	TRUE	FALSE	2.5211	loop_483	70000	8.75	16	0.100968	0.17758	0.0766116	0.925473	FALSE	FALSE	FALSE	12	14	4	6	8	12	2	5	14	9	8	4	16	7	7	7	7	6	10	7	13	12	12	8
chr1	51560000	51570000	10001	*	chr1	51760000	51770000	10001	*	FALSE	FALSE	TRUE	FALSE	2.72258	loop_484	210000	6.16667	19	0.556268	1.07984	0.523575	0.119249	FALSE	FALSE	FALSE	2	6	2	6	2	4	3	5	9	5	10	4	3	3	4	9	3	4	10	5	12	8	10	19
chr1	51620000	51630000	10001	*	chr1	51760000	51770000	10001	*	TRUE	TRUE	TRUE	TRUE	4.80197	loop_485	150000	13.75	31	0.069601	-0.235215	-0.304816	0.676006	FALSE	FALSE	FALSE	20	13	22	22	8	8	12	6	31	22	20	16	10	8	10	10	15	10	9	7	15	7	14	15
chr1	51820000	51830000	10001	*	chr1	51990000	52000000	10001	*	TRUE	FALSE	FALSE	FALSE	3.80366	loop_486	180000	5.20833	14	0.117441	-0.131648	-0.249089	0.917107	FALSE	FALSE	FALSE	4	11	2	7	2	4	6	4	6	14	4	5	7	2	3	5	2	2	4	7	3	4	4	13
chr1	51890000	51900000	10001	*	chr1	52000000	52010000	10001	*	TRUE	TRUE	TRUE	TRUE	5.56392	loop_487	120000	12.375	18	0.0628339	0.280954	0.21812	0.717485	FALSE	FALSE	FALSE	15	10	12	14	6	7	10	13	17	11	17	13	10	12	11	7	13	10	10	11	18	16	18	16
chr1	51900000	51910000	10001	*	chr1	52310000	52320000	10001	*	FALSE	FALSE	FALSE	TRUE	2.21859	loop_488	420000	1.83333	5	-0.215205	0.195371	0.410576	0.914617	FALSE	FALSE	FALSE	3	3	3	1	1	1	0	2	4	1	1	1	0	1	1	4	4	1	0	2	1	2	2	5
chr1	52120000	52130000	10001	*	chr1	52290000	52300000	10001	*	TRUE	TRUE	TRUE	TRUE	5.37924	loop_489	180000	15.4583	27	0.0263314	-0.240078	-0.26641	0.703829	FALSE	FALSE	FALSE	26	20	14	21	8	10	15	11	17	27	24	23	10	7	19	11	9	12	7	14	17	22	12	15
chr1	52130000	52140000	10001	*	chr1	52680000	52690000	10001	*	TRUE	TRUE	TRUE	TRUE	3.55524	loop_490	560000	2.16667	8	-0.659683	0.352743	1.01243	0.523194	FALSE	FALSE	FALSE	2	2	2	4	1	2	2	1	1	2	1	1	2	1	2	1	1	1	4	0	5	3	8	3
chr1	52390000	52400000	10001	*	chr1	53180000	53190000	10001	*	FALSE	FALSE	TRUE	TRUE	2.86549	loop_491	800000	1.33333	5	0.56574	1.80899	1.24325	0.252966	FALSE	FALSE	FALSE	1	1	1	1	0	0	0	1	2	0	2	1	0	2	0	1	5	0	2	0	4	2	3	3
chr1	52400000	52410000	10001	*	chr1	52680000	52690000	10001	*	TRUE	TRUE	TRUE	TRUE	4.44745	loop_492	290000	7.20833	18	0.877301	0.61472	-0.262581	0.186632	FALSE	FALSE	FALSE	7	3	7	5	6	5	3	2	18	14	10	8	11	2	7	7	8	8	11	4	9	7	6	5
chr1	52470000	52480000	10001	*	chr1	52680000	52690000	10001	*	TRUE	FALSE	FALSE	FALSE	4.1998	loop_493	220000	6.375	14	-0.0705329	0.0739974	0.14453	0.963742	FALSE	FALSE	FALSE	11	7	10	12	1	5	2	3	14	8	6	10	3	2	7	2	2	4	7	6	12	8	4	7
chr1	52550000	52560000	10001	*	chr1	52660000	52670000	10001	*	TRUE	TRUE	TRUE	TRUE	3.73468	loop_494	120000	9.95833	18	0.000696512	-0.110329	-0.111026	0.953766	FALSE	FALSE	FALSE	13	11	8	16	7	8	9	7	11	17	11	18	11	6	4	8	7	7	13	7	11	7	10	12
chr1	52700000	52710000	10001	*	chr1	52920000	52930000	10001	*	FALSE	FALSE	TRUE	TRUE	2.96881	loop_495	230000	4.16667	11	-0.0253399	0.0206494	0.0459893	0.997832	FALSE	FALSE	FALSE	5	4	3	2	3	6	3	5	6	7	2	6	1	3	4	4	2	1	6	2	11	3	4	7
chr1	52700000	52710000	10001	*	chr1	52740000	52750000	10001	*	TRUE	FALSE	FALSE	FALSE	3.36827	loop_496	50000	9.16667	16	-0.034729	0.0390173	0.0737463	0.985502	FALSE	FALSE	FALSE	10	11	14	14	6	5	6	5	13	12	11	16	4	6	5	8	7	3	3	12	14	15	12	8
chr1	52700000	52710000	10001	*	chr1	53180000	53190000	10001	*	TRUE	FALSE	TRUE	TRUE	5.32471	loop_497	490000	4	7	0.0862109	0.90242	0.816209	0.257782	FALSE	FALSE	FALSE	3	5	5	7	1	1	0	3	5	3	7	4	3	1	3	2	4	4	7	5	5	5	6	7
chr1	52900000	52910000	10001	*	chr1	53180000	53190000	10001	*	TRUE	TRUE	TRUE	TRUE	3.9837	loop_498	290000	6.45833	13	-0.289516	-0.27321	0.0163067	0.820216	FALSE	FALSE	FALSE	10	4	9	8	2	8	7	8	13	10	3	9	2	7	3	4	3	7	6	5	9	6	7	5
chr1	53020000	53030000	10001	*	chr1	53180000	53190000	10001	*	FALSE	FALSE	TRUE	FALSE	2.5055	loop_499	170000	6.16667	10	0.269154	0.177597	-0.091557	0.871804	FALSE	FALSE	FALSE	9	6	6	7	2	6	1	6	10	10	4	7	10	4	4	6	4	4	4	9	7	6	8	8
chr1	53060000	53070000	10001	*	chr1	53170000	53180000	10001	*	TRUE	TRUE	FALSE	TRUE	2.92641	loop_500	120000	6.95833	14	0.145276	-0.420944	-0.56622	0.50404	FALSE	FALSE	FALSE	9	8	8	8	7	9	3	4	14	12	11	14	4	7	3	4	3	3	6	6	6	6	6	6
chr1	53250000	53260000	10001	*	chr1	53750000	53760000	10001	*	FALSE	FALSE	FALSE	TRUE	2.36572	loop_501	510000	1.54167	4	-0.573018	0.493175	1.06619	0.605001	FALSE	FALSE	FALSE	2	0	2	1	2	3	0	1	2	0	2	1	1	1	0	1	0	1	3	1	3	3	3	4
chr1	53270000	53280000	10001	*	chr1	53390000	53400000	10001	*	TRUE	TRUE	TRUE	TRUE	8.93732	loop_502	130000	20.75	35	-0.420647	-0.255634	0.165013	0.343643	FALSE	FALSE	FALSE	25	20	33	29	19	23	18	18	16	35	27	23	13	17	12	9	21	12	20	16	28	14	30	20
chr1	53450000	53460000	10001	*	chr1	53750000	53760000	10001	*	FALSE	FALSE	TRUE	FALSE	3.07858	loop_503	310000	5.58333	14	0.421534	0.94177	0.520237	0.229113	FALSE	FALSE	FALSE	6	5	7	6	3	0	2	2	8	8	12	6	3	3	1	4	8	5	3	4	14	8	8	8
chr1	53470000	53480000	10001	*	chr1	53970000	53980000	10001	*	FALSE	FALSE	FALSE	TRUE	2.63533	loop_504	510000	1.75	5	1.67058	2.05603	0.385453	0.131951	FALSE	FALSE	FALSE	1	2	1	0	0	1	0	0	2	2	5	3	3	1	0	1	4	3	1	2	4	3	2	1
chr1	53480000	53490000	10001	*	chr1	53680000	53690000	10001	*	TRUE	TRUE	TRUE	TRUE	4.0378	loop_505	210000	10.5	20	-0.0930052	0.767821	0.860826	0.0307721	FALSE	FALSE	FALSE	11	8	12	9	5	10	5	7	16	13	7	11	7	9	6	1	20	11	13	11	18	20	9	13
chr1	53480000	53490000	10001	*	chr1	53750000	53760000	10001	*	TRUE	TRUE	TRUE	TRUE	4.30072	loop_506	280000	10.625	22	0.12361	-0.406465	-0.530076	0.383655	FALSE	FALSE	FALSE	17	12	14	15	6	7	7	9	22	16	11	16	10	8	10	9	6	7	8	7	9	13	11	5
chr1	53610000	53620000	10001	*	chr1	53750000	53760000	10001	*	TRUE	FALSE	FALSE	FALSE	2.46452	loop_507	150000	4.875	12	0.139009	-0.456493	-0.595502	0.592268	FALSE	FALSE	FALSE	7	12	4	6	1	4	4	3	8	7	6	7	4	5	4	6	4	4	3	3	3	1	7	4
chr1	53710000	53720000	10001	*	chr1	53750000	53760000	10001	*	TRUE	FALSE	FALSE	TRUE	2.44428	loop_508	50000	13.875	31	0.1606	-0.871038	-1.03164	0.00370236	FALSE	TRUE	TRUE	20	17	15	22	10	13	11	11	29	25	13	31	17	13	9	9	6	10	4	4	14	13	9	8
chr1	53770000	53780000	10001	*	chr1	53810000	53820000	10001	*	FALSE	TRUE	FALSE	FALSE	2.22974	loop_509	50000	7.625	20	0.183694	0.0634471	-0.120247	0.927957	FALSE	FALSE	FALSE	11	8	5	5	7	6	9	3	20	6	15	11	5	6	3	3	5	5	4	5	11	15	7	8
chr1	53850000	53860000	10001	*	chr1	54480000	54490000	10001	*	FALSE	FALSE	FALSE	TRUE	3.02408	loop_510	640000	1.83333	4	0.542546	0.683398	0.140852	0.777635	FALSE	FALSE	FALSE	0	1	0	3	3	2	1	0	1	3	3	3	0	2	3	1	2	3	1	0	3	2	3	4
chr1	53860000	53870000	10001	*	chr1	54810000	54820000	10001	*	FALSE	FALSE	FALSE	TRUE	3.00969	loop_511	960000	1.91667	5	0.403294	-0.245346	-0.648641	0.789551	FALSE	FALSE	FALSE	3	3	2	2	0	1	2	1	4	2	1	2	0	5	1	4	1	0	3	0	2	2	4	1
chr1	53870000	53880000	10001	*	chr1	53950000	53960000	10001	*	TRUE	TRUE	TRUE	TRUE	5.19923	loop_512	90000	16.9583	28	0.0233987	0.317503	0.294104	0.538192	FALSE	FALSE	FALSE	25	21	17	19	6	11	8	14	19	19	26	19	16	14	12	6	16	18	6	16	24	27	20	28
chr1	54060000	54070000	10001	*	chr1	54400000	54410000	10001	*	FALSE	TRUE	FALSE	FALSE	2.40568	loop_513	350000	3.95833	9	0.952919	0.696221	-0.256698	0.342291	FALSE	FALSE	FALSE	0	1	7	3	2	3	1	3	9	5	6	6	4	3	3	5	3	1	6	4	4	4	7	5
chr1	54060000	54070000	10001	*	chr1	54490000	54500000	10001	*	FALSE	FALSE	TRUE	TRUE	4.15017	loop_514	440000	6.33333	13	-0.0124231	0.151907	0.16433	0.939807	FALSE	FALSE	FALSE	6	9	10	4	6	3	2	6	8	9	4	10	8	2	5	4	7	3	2	8	13	4	7	12
chr1	54070000	54080000	10001	*	chr1	54810000	54820000	10001	*	TRUE	FALSE	TRUE	TRUE	3.22557	loop_515	750000	2.95833	9	-0.547959	-0.00706024	0.540899	0.72989	FALSE	FALSE	FALSE	4	7	1	5	2	1	2	3	4	2	0	3	2	3	2	2	1	2	3	1	6	4	2	9
chr1	54110000	54120000	10001	*	chr1	54400000	54410000	10001	*	TRUE	TRUE	FALSE	TRUE	2.51376	loop_516	300000	5.5	14	-0.256888	-0.230985	0.0259039	0.880172	FALSE	FALSE	FALSE	5	9	8	5	3	3	7	7	3	14	4	10	4	5	3	1	3	4	5	5	8	6	8	2
chr1	54120000	54130000	10001	*	chr1	54480000	54490000	10001	*	TRUE	TRUE	TRUE	TRUE	3.51349	loop_517	370000	7.79167	17	-0.045879	-0.123587	-0.077708	0.966824	FALSE	FALSE	FALSE	10	7	6	7	5	9	8	9	17	9	5	11	8	8	6	2	12	6	2	7	7	6	9	11
chr1	54190000	54200000	10001	*	chr1	54400000	54410000	10001	*	FALSE	FALSE	TRUE	FALSE	2.24737	loop_518	220000	5.33333	10	-0.155256	0.199998	0.355254	0.822554	FALSE	FALSE	FALSE	5	2	7	6	4	4	5	7	4	8	1	9	5	4	3	5	3	9	4	6	3	6	10	8
chr1	54310000	54320000	10001	*	chr1	54490000	54500000	10001	*	TRUE	FALSE	TRUE	TRUE	3.35278	loop_519	190000	5.79167	10	-0.485917	-0.132039	0.353878	0.67248	FALSE	FALSE	FALSE	3	4	7	7	9	8	5	7	10	8	5	6	5	3	2	2	5	5	7	9	7	4	6	5
chr1	54400000	54410000	10001	*	chr1	54480000	54490000	10001	*	TRUE	TRUE	TRUE	TRUE	4.86662	loop_520	90000	13.7083	23	-0.126477	-0.46553	-0.339053	0.440114	FALSE	FALSE	FALSE	17	17	9	20	10	19	12	15	23	9	18	20	14	7	14	13	14	14	8	4	15	11	9	17
chr1	54500000	54510000	10001	*	chr1	54810000	54820000	10001	*	TRUE	FALSE	TRUE	TRUE	4.55746	loop_521	320000	4.41667	11	0.00813937	0.541519	0.533379	0.619493	FALSE	FALSE	FALSE	4	3	10	6	1	2	0	5	4	11	3	6	0	4	5	1	4	8	3	7	6	4	5	4
chr1	54670000	54680000	10001	*	chr1	54800000	54810000	10001	*	TRUE	TRUE	TRUE	TRUE	4.5897	loop_522	140000	10.4583	18	0.311182	0.305166	-0.00601595	0.692706	FALSE	FALSE	FALSE	12	5	12	8	9	6	8	9	14	14	15	15	6	6	11	12	14	10	9	7	11	10	10	18
chr1	54940000	54950000	10001	*	chr1	54990000	55000000	10001	*	TRUE	TRUE	TRUE	TRUE	3.5971	loop_523	60000	24.5417	38	0.219629	0.0828356	-0.136794	0.717921	FALSE	FALSE	FALSE	17	30	28	18	20	27	20	14	29	31	38	38	18	17	24	25	21	20	20	20	30	27	22	35
chr1	55130000	55140000	10001	*	chr1	56580000	56590000	10001	*	TRUE	TRUE	FALSE	TRUE	3.48893	loop_524	1460000	2.29167	6	-0.569484	-0.126146	0.443339	0.795079	FALSE	FALSE	FALSE	2	1	6	6	2	1	0	3	3	3	3	1	1	2	1	1	2	1	4	1	2	3	5	1
chr1	55140000	55150000	10001	*	chr1	55270000	55280000	10001	*	TRUE	TRUE	TRUE	TRUE	8.48942	loop_525	140000	20.8333	34	0.191186	0.436154	0.244968	0.312423	FALSE	FALSE	FALSE	28	27	26	20	12	10	5	12	23	25	34	21	14	21	21	11	15	15	24	21	27	31	30	27
chr1	55280000	55290000	10001	*	chr1	55330000	55340000	10001	*	TRUE	TRUE	FALSE	TRUE	3.08095	loop_526	60000	16.9167	33	0.207504	-0.834544	-1.04205	0.00266974	FALSE	TRUE	TRUE	33	15	17	27	3	20	8	22	32	29	27	24	14	15	22	15	7	7	10	10	18	10	11	10
chr1	55280000	55290000	10001	*	chr1	56580000	56590000	10001	*	TRUE	TRUE	TRUE	TRUE	6.30716	loop_527	1310000	9.70833	22	0.211084	-0.579142	-0.790226	0.201869	FALSE	FALSE	FALSE	15	15	22	13	9	5	2	1	22	9	20	17	8	8	6	9	5	4	8	1	12	9	6	7
chr1	55280000	55290000	10001	*	chr1	56700000	56710000	10001	*	FALSE	TRUE	TRUE	TRUE	3.82585	loop_528	1430000	4.16667	7	-0.182462	0.2286	0.411063	0.814283	FALSE	FALSE	FALSE	7	2	5	6	4	3	3	2	5	5	3	5	0	2	4	6	7	5	5	1	7	6	2	5
chr1	55280000	55290000	10001	*	chr1	56810000	56820000	10001	*	FALSE	TRUE	FALSE	TRUE	3.93382	loop_529	1540000	2.75	8	1.14113	0.189369	-0.951762	0.252306	FALSE	FALSE	FALSE	3	2	2	0	3	1	2	1	7	5	4	8	2	1	1	7	2	1	2	2	2	2	3	3
chr1	55300000	55310000	10001	*	chr1	55890000	55900000	10001	*	FALSE	TRUE	FALSE	TRUE	2.89896	loop_530	600000	3.45833	6	0.476669	0.0920762	-0.384593	0.761762	FALSE	FALSE	FALSE	5	4	6	3	0	1	3	2	5	4	3	4	5	5	5	3	6	4	2	2	2	4	3	2
chr1	55370000	55380000	10001	*	chr1	55470000	55480000	10001	*	FALSE	TRUE	TRUE	TRUE	2.73554	loop_531	110000	8.83333	19	-0.597769	-0.260612	0.337157	0.398388	FALSE	FALSE	FALSE	9	19	14	13	9	9	4	6	11	12	9	8	5	4	7	4	15	4	7	6	9	6	15	7
chr1	55370000	55380000	10001	*	chr1	55890000	55900000	10001	*	TRUE	TRUE	TRUE	TRUE	2.89431	loop_532	530000	5.45833	11	0.149252	-0.272076	-0.421329	0.758739	FALSE	FALSE	FALSE	8	10	6	9	3	0	6	2	11	10	8	10	3	6	2	3	5	5	2	3	5	5	5	4
chr1	55370000	55380000	10001	*	chr1	56580000	56590000	10001	*	FALSE	FALSE	TRUE	TRUE	4.14489	loop_533	1220000	5.95833	12	0.451899	0.323639	-0.12826	0.699386	FALSE	FALSE	FALSE	9	4	7	6	4	0	4	4	11	5	4	9	8	7	4	7	6	3	4	7	5	9	4	12
chr1	55380000	55390000	10001	*	chr1	56140000	56150000	10001	*	FALSE	FALSE	TRUE	TRUE	2.34473	loop_534	770000	2.125	7	0.0437405	0.404391	0.360651	0.877739	FALSE	FALSE	FALSE	0	0	3	2	1	3	2	3	3	2	3	2	1	2	1	1	1	1	2	1	2	7	5	3
chr1	55470000	55480000	10001	*	chr1	55890000	55900000	10001	*	TRUE	TRUE	TRUE	TRUE	2.95117	loop_535	430000	6.625	15	0.0374523	0.680898	0.643445	0.313456	FALSE	FALSE	FALSE	8	8	7	15	0	4	3	0	14	4	8	5	4	4	5	4	9	7	8	6	13	10	7	6
chr1	55480000	55490000	10001	*	chr1	56580000	56590000	10001	*	TRUE	TRUE	TRUE	TRUE	3.25822	loop_536	1110000	4.58333	9	-0.396543	-0.0466371	0.349906	0.787347	FALSE	FALSE	FALSE	4	6	4	9	6	6	0	4	7	5	8	8	2	1	2	1	4	3	5	8	6	2	3	6
chr1	55490000	55500000	10001	*	chr1	56390000	56400000	10001	*	FALSE	FALSE	TRUE	FALSE	3.32314	loop_537	910000	1.91667	6	-0.493413	0.911051	1.40446	0.299005	FALSE	FALSE	FALSE	1	3	2	3	0	1	1	2	0	3	3	2	2	0	0	0	3	1	1	6	4	3	2	3
chr1	55700000	55710000	10001	*	chr1	55840000	55850000	10001	*	TRUE	FALSE	FALSE	TRUE	2.36967	loop_538	150000	7.29167	13	-0.0995689	-0.630842	-0.531273	0.383151	FALSE	FALSE	FALSE	12	9	13	10	8	6	4	4	13	12	8	6	8	5	7	7	6	6	6	3	7	2	8	5
chr1	55700000	55710000	10001	*	chr1	55870000	55880000	10001	*	FALSE	FALSE	TRUE	FALSE	2.05261	loop_539	180000	6.33333	16	0.564976	0.846456	0.28148	0.280473	FALSE	FALSE	FALSE	4	4	3	7	6	4	0	6	9	16	7	9	4	3	4	4	12	4	6	4	7	10	10	9
chr1	55710000	55720000	10001	*	chr1	56580000	56590000	10001	*	TRUE	FALSE	TRUE	TRUE	3.16559	loop_540	880000	3.5	9	-0.809611	-0.288078	0.521533	0.504644	FALSE	FALSE	FALSE	6	9	4	3	4	3	1	4	2	6	1	4	3	3	2	0	4	3	3	0	5	6	2	6
chr1	55880000	55890000	10001	*	chr1	56810000	56820000	10001	*	FALSE	FALSE	FALSE	TRUE	3.75458	loop_541	940000	2.95833	6	-0.202999	0.223059	0.426058	0.852091	FALSE	FALSE	FALSE	6	6	2	5	3	1	1	0	3	5	3	5	1	2	1	2	4	4	2	2	2	5	4	2
chr1	55890000	55900000	10001	*	chr1	56580000	56590000	10001	*	TRUE	TRUE	TRUE	TRUE	3.68096	loop_542	700000	4.5	10	-0.332232	0.256139	0.588371	0.637188	FALSE	FALSE	FALSE	4	4	3	10	2	5	5	2	5	6	5	9	1	3	1	1	3	4	4	4	6	7	9	5
chr1	55890000	55900000	10001	*	chr1	56710000	56720000	10001	*	FALSE	FALSE	FALSE	TRUE	2.41373	loop_543	830000	2.58333	8	-0.145568	-0.304828	-0.15926	0.939156	FALSE	FALSE	FALSE	3	7	4	2	0	2	1	3	6	3	1	3	0	4	1	3	3	1	0	2	2	8	0	3
chr1	56170000	56180000	10001	*	chr1	56570000	56580000	10001	*	FALSE	FALSE	FALSE	TRUE	2.39372	loop_544	410000	3.95833	10	0.272488	0.565393	0.292905	0.700433	FALSE	FALSE	FALSE	5	6	6	3	0	3	1	1	6	5	5	3	6	4	1	2	2	3	3	3	10	6	5	6
chr1	56400000	56410000	10001	*	chr1	56580000	56590000	10001	*	FALSE	FALSE	TRUE	TRUE	2.75902	loop_545	190000	5.16667	12	-0.321252	0.697199	1.01845	0.170664	FALSE	FALSE	FALSE	6	6	1	6	8	2	1	5	6	6	5	5	1	2	2	3	8	1	5	8	12	12	5	8
chr1	56580000	56590000	10001	*	chr1	56700000	56710000	10001	*	FALSE	FALSE	FALSE	TRUE	3.68034	loop_546	130000	8.875	19	0.0529459	0.161419	0.108473	0.936155	FALSE	FALSE	FALSE	10	13	11	8	6	3	6	8	11	19	13	7	9	7	4	4	12	4	9	8	18	6	5	12
chr1	56750000	56760000	10001	*	chr1	56800000	56810000	10001	*	FALSE	FALSE	TRUE	FALSE	2.84571	loop_547	60000	10.3333	18	-0.512149	0.427118	0.939267	0.0428741	FALSE	FALSE	FALSE	13	10	12	12	8	8	6	10	6	9	8	7	8	7	9	5	15	15	8	13	16	12	13	18
chr1	56830000	56840000	10001	*	chr1	56960000	56970000	10001	*	FALSE	FALSE	TRUE	FALSE	2.66992	loop_548	140000	6.125	13	-0.562923	0.724556	1.28748	0.0258468	FALSE	FALSE	FALSE	5	8	7	7	7	5	3	1	2	5	4	5	3	6	4	2	9	6	6	11	13	8	10	10
chr1	56830000	56840000	10001	*	chr1	57190000	57200000	10001	*	FALSE	FALSE	TRUE	FALSE	2.63885	loop_549	370000	3.16667	9	-0.540212	0.824062	1.36427	0.15543	FALSE	FALSE	FALSE	8	4	0	4	1	3	1	2	4	1	2	1	1	3	2	2	9	6	5	4	3	3	3	4
chr1	56830000	56840000	10001	*	chr1	58040000	58050000	10001	*	TRUE	TRUE	TRUE	TRUE	4.0462	loop_550	1220000	3.75	9	-0.904214	-0.282124	0.62209	0.40989	FALSE	FALSE	FALSE	7	7	9	7	2	0	4	2	3	4	3	3	1	3	2	2	3	0	4	2	3	6	4	9
chr1	56830000	56840000	10001	*	chr1	58160000	58170000	10001	*	TRUE	TRUE	TRUE	TRUE	3.9986	loop_551	1340000	4.08333	7	-0.291386	-0.45439	-0.163004	0.775161	FALSE	FALSE	FALSE	5	4	7	7	2	5	3	4	4	6	7	5	3	2	2	4	6	4	2	0	7	4	4	1
chr1	56840000	56850000	10001	*	chr1	57620000	57630000	10001	*	FALSE	FALSE	TRUE	FALSE	2.25652	loop_552	790000	2.33333	6	0.0106705	1.18342	1.17275	0.259253	FALSE	FALSE	FALSE	1	5	4	2	0	2	0	0	1	2	6	2	2	0	0	2	6	2	5	3	4	1	4	2
chr1	56840000	56850000	10001	*	chr1	57660000	57670000	10001	*	FALSE	FALSE	FALSE	TRUE	2.52935	loop_553	830000	2.375	6	0.250775	0.298219	0.0474438	0.939581	FALSE	FALSE	FALSE	1	5	1	2	2	5	0	0	1	0	6	3	1	1	4	4	2	1	2	3	3	4	2	4
chr1	58010000	58020000	10001	*	chr1	58160000	58170000	10001	*	FALSE	FALSE	TRUE	TRUE	2.53279	loop_554	160000	5.625	13	-1.13832	0.324539	1.46286	0.0212906	TRUE	FALSE	TRUE	9	3	7	13	1	6	6	4	3	3	6	1	3	1	5	2	11	6	7	4	11	6	7	10
chr1	58510000	58520000	10001	*	chr1	58650000	58660000	10001	*	TRUE	TRUE	TRUE	TRUE	7.76207	loop_555	150000	19.875	35	0.217955	0.59413	0.376175	0.0991422	FALSE	FALSE	FALSE	21	22	23	29	7	11	6	11	30	22	21	35	14	18	9	12	23	21	19	28	34	19	19	23
chr1	58520000	58530000	10001	*	chr1	59760000	59770000	10001	*	TRUE	TRUE	TRUE	TRUE	3.79762	loop_556	1250000	2.41667	6	-0.425806	0.0411752	0.466981	0.833829	FALSE	FALSE	FALSE	1	1	2	2	1	4	4	4	4	0	5	1	2	1	2	1	3	1	2	2	6	3	4	2
chr1	58570000	58580000	10001	*	chr1	58650000	58660000	10001	*	TRUE	TRUE	FALSE	FALSE	3.5601	loop_557	90000	16.0417	28	-0.357266	-0.557907	-0.200641	0.194414	FALSE	FALSE	FALSE	24	23	21	26	19	11	17	9	24	16	18	28	14	8	10	10	13	8	7	9	20	15	19	16
chr1	58730000	58740000	10001	*	chr1	59480000	59490000	10001	*	FALSE	FALSE	TRUE	FALSE	2.33701	loop_558	760000	2.20833	8	0.729574	2.19433	1.46476	0.0232982	TRUE	TRUE	TRUE	3	3	0	1	0	0	0	1	4	3	5	2	0	0	1	0	8	4	3	3	6	3	1	2
chr1	58740000	58750000	10001	*	chr1	59690000	59700000	10001	*	FALSE	FALSE	TRUE	TRUE	3.67974	loop_559	960000	7.29167	18	0.312317	0.725877	0.413561	0.343902	FALSE	FALSE	FALSE	9	6	10	10	1	5	1	2	8	6	9	4	5	8	10	6	6	4	9	10	18	4	13	11
chr1	58740000	58750000	10001	*	chr1	59750000	59760000	10001	*	FALSE	TRUE	FALSE	TRUE	3.62589	loop_560	1020000	6.79167	17	0.249903	0.103965	-0.145938	0.879976	FALSE	FALSE	FALSE	6	9	5	9	6	3	7	3	6	10	6	17	4	7	6	6	7	7	5	4	6	11	8	5
chr1	58750000	58760000	10001	*	chr1	59290000	59300000	10001	*	FALSE	FALSE	TRUE	FALSE	3.9435	loop_561	550000	4.25	11	0.0796958	1.16861	1.08892	0.0814531	FALSE	FALSE	FALSE	1	4	7	3	3	4	1	0	5	7	1	3	2	2	3	3	8	4	5	3	7	6	11	9
chr1	58780000	58790000	10001	*	chr1	58930000	58940000	10001	*	FALSE	TRUE	FALSE	FALSE	3.51693	loop_562	160000	8.16667	16	0.17862	-0.737997	-0.916617	0.11683	FALSE	FALSE	FALSE	10	6	7	7	11	10	5	11	13	14	16	12	11	6	7	3	2	3	2	4	12	7	4	13
chr1	58780000	58790000	10001	*	chr1	59070000	59080000	10001	*	FALSE	TRUE	FALSE	FALSE	2.15088	loop_563	300000	6.08333	15	0.159959	-0.343983	-0.503942	0.685271	FALSE	FALSE	FALSE	12	10	6	4	7	1	2	7	15	5	12	2	6	6	7	6	4	5	8	3	1	7	5	5
chr1	58780000	58790000	10001	*	chr1	59130000	59140000	10001	*	FALSE	TRUE	FALSE	TRUE	2.53669	loop_564	360000	5.29167	15	0.313499	-1.01568	-1.32918	0.0491258	FALSE	FALSE	FALSE	8	7	5	7	3	5	6	3	8	11	15	9	4	6	6	2	3	2	2	2	2	3	4	4
chr1	58780000	58790000	10001	*	chr1	59290000	59300000	10001	*	TRUE	TRUE	FALSE	TRUE	3.65567	loop_565	520000	7.20833	17	0.219891	0.282818	0.0629273	0.837193	FALSE	FALSE	FALSE	6	10	6	8	4	4	6	5	5	10	7	17	6	4	10	3	4	5	7	9	12	6	10	9
chr1	58780000	58790000	10001	*	chr1	59700000	59710000	10001	*	TRUE	TRUE	FALSE	TRUE	4.21384	loop_566	930000	6.375	14	0.564133	-1.09227	-1.6564	0.00238822	FALSE	TRUE	TRUE	8	6	3	6	7	7	6	6	10	14	9	11	5	14	9	6	4	1	3	2	8	2	4	2
chr1	58790000	58800000	10001	*	chr1	59020000	59030000	10001	*	TRUE	TRUE	TRUE	TRUE	2.28529	loop_567	240000	6.45833	12	-0.0910114	0.343449	0.43446	0.677101	FALSE	FALSE	FALSE	8	7	4	11	5	4	6	2	10	8	2	11	5	3	3	6	8	3	12	4	9	7	7	10
chr1	58810000	58820000	10001	*	chr1	58890000	58900000	10001	*	TRUE	FALSE	TRUE	FALSE	2.33919	loop_568	90000	9.33333	20	-0.174564	-0.308336	-0.133773	0.78083	FALSE	FALSE	FALSE	10	12	7	9	10	12	7	12	11	20	15	7	8	5	3	9	9	9	9	4	9	8	9	10
chr1	58900000	58910000	10001	*	chr1	59690000	59700000	10001	*	TRUE	FALSE	FALSE	FALSE	2.66808	loop_569	800000	4.04167	12	-0.0208626	-0.344366	-0.323504	0.853358	FALSE	FALSE	FALSE	2	3	6	12	2	3	3	3	6	5	5	7	0	4	4	4	2	2	2	0	3	8	6	5
chr1	58940000	58950000	10001	*	chr1	59290000	59300000	10001	*	FALSE	FALSE	FALSE	TRUE	2.12961	loop_570	360000	4.375	9	0.474112	0.577497	0.103385	0.631337	FALSE	FALSE	FALSE	3	4	7	5	4	2	0	1	9	8	4	4	3	4	4	3	4	3	2	4	7	6	7	7
chr1	59080000	59090000	10001	*	chr1	59280000	59290000	10001	*	TRUE	TRUE	FALSE	TRUE	2.52128	loop_571	210000	5.5	10	0.12962	0.0979506	-0.0316695	0.969352	FALSE	FALSE	FALSE	7	6	3	10	3	3	5	3	8	7	9	6	6	4	3	4	3	3	4	5	9	7	7	7
chr1	59080000	59090000	10001	*	chr1	59700000	59710000	10001	*	FALSE	FALSE	FALSE	TRUE	1.93053	loop_572	630000	4.83333	11	-0.0725225	-0.107651	-0.0351281	0.984356	FALSE	FALSE	FALSE	5	5	4	8	6	2	1	8	4	5	6	7	9	1	3	4	1	5	3	5	4	11	6	3
chr1	59150000	59160000	10001	*	chr1	59700000	59710000	10001	*	TRUE	FALSE	FALSE	TRUE	2.53641	loop_573	560000	4.45833	12	-0.178607	-0.277257	-0.0986499	0.913796	FALSE	FALSE	FALSE	12	7	4	0	7	3	3	3	5	6	2	8	6	2	3	4	2	2	7	3	3	8	2	5
chr1	59290000	59300000	10001	*	chr1	59690000	59700000	10001	*	TRUE	TRUE	TRUE	TRUE	3.60529	loop_574	410000	9.375	21	-0.0244599	-0.151198	-0.126738	0.932935	FALSE	FALSE	FALSE	10	10	11	14	6	6	10	8	9	16	10	21	5	9	5	6	10	7	5	7	14	5	11	10
chr1	59360000	59370000	10001	*	chr1	59690000	59700000	10001	*	FALSE	FALSE	FALSE	TRUE	2.11098	loop_575	340000	5.58333	13	0.281601	0.532325	0.250724	0.646104	FALSE	FALSE	FALSE	6	4	9	5	1	5	2	4	8	1	6	13	3	4	5	7	7	4	8	7	6	7	7	5
chr1	59420000	59430000	10001	*	chr1	59690000	59700000	10001	*	FALSE	FALSE	TRUE	FALSE	2.78235	loop_576	280000	5.83333	13	-0.00578768	1.18043	1.18621	0.011905	FALSE	TRUE	TRUE	9	3	2	6	1	3	3	5	6	4	8	4	3	5	2	2	8	6	6	10	13	11	8	12
chr1	59700000	59710000	10001	*	chr1	59750000	59760000	10001	*	TRUE	FALSE	FALSE	TRUE	2.56088	loop_577	60000	12.5417	25	0.22577	-0.306349	-0.532119	0.353629	FALSE	FALSE	FALSE	13	23	15	15	6	9	5	12	24	20	24	25	6	8	14	5	10	5	9	8	12	11	8	14
chr1	59870000	59880000	10001	*	chr1	59940000	59950000	10001	*	TRUE	TRUE	TRUE	TRUE	4.23822	loop_578	80000	15.0833	27	0.265136	1.03024	0.765109	0.000753898	FALSE	TRUE	TRUE	12	12	20	14	3	7	9	7	12	19	17	16	14	11	11	7	18	19	13	23	21	27	25	25
chr1	59970000	59980000	10001	*	chr1	60130000	60140000	10001	*	FALSE	TRUE	FALSE	TRUE	3.00797	loop_579	170000	6.33333	13	-0.475981	-0.476101	-0.0001195	0.550368	FALSE	FALSE	FALSE	13	9	12	7	6	1	4	9	7	11	4	9	4	2	5	5	5	3	4	6	9	6	6	5
chr1	59970000	59980000	10001	*	chr1	60280000	60290000	10001	*	FALSE	FALSE	TRUE	TRUE	2.4641	loop_580	320000	3.91667	10	0.557797	0.942582	0.384785	0.374503	FALSE	FALSE	FALSE	5	2	4	2	3	1	2	1	6	2	10	3	3	4	2	2	5	1	3	2	7	6	8	10
chr1	59970000	59980000	10001	*	chr1	60760000	60770000	10001	*	TRUE	TRUE	TRUE	TRUE	3.90242	loop_581	800000	6.5	18	0.366842	-0.434165	-0.801007	0.30923	FALSE	FALSE	FALSE	4	9	4	4	5	4	10	7	8	11	7	10	6	3	8	13	4	2	3	3	7	2	4	18
chr1	59970000	59980000	10001	*	chr1	61040000	61050000	10001	*	FALSE	FALSE	TRUE	FALSE	3.44546	loop_582	1080000	2.33333	7	-0.363015	0.769344	1.13236	0.383539	FALSE	FALSE	FALSE	3	3	2	2	1	2	1	2	1	2	1	2	3	2	2	0	0	7	7	4	1	2	2	4
chr1	60000000	60010000	10001	*	chr1	60110000	60120000	10001	*	FALSE	FALSE	TRUE	FALSE	2.4442	loop_583	120000	6.79167	14	-0.362404	-0.212949	0.149456	0.775768	FALSE	FALSE	FALSE	12	6	10	10	2	7	8	4	11	5	10	3	7	9	3	2	6	5	6	4	14	2	8	9
chr1	60150000	60160000	10001	*	chr1	60760000	60770000	10001	*	FALSE	TRUE	TRUE	TRUE	2.5291	loop_584	620000	5.875	14	0.0400272	-0.240883	-0.28091	0.863843	FALSE	FALSE	FALSE	14	5	6	8	4	2	5	4	5	13	10	10	5	6	2	2	8	3	2	3	7	6	5	6
chr1	60150000	60160000	10001	*	chr1	61040000	61050000	10001	*	FALSE	FALSE	TRUE	TRUE	5.07134	loop_585	900000	3.45833	11	0.386969	0.59095	0.203981	0.714487	FALSE	FALSE	FALSE	3	1	4	2	4	4	2	0	4	3	4	6	2	2	5	2	2	1	4	2	11	7	3	5
chr1	60150000	60160000	10001	*	chr1	61600000	61610000	10001	*	FALSE	FALSE	TRUE	TRUE	2.55715	loop_586	1460000	1	4	1.44312	0.858281	-0.584843	0.569779	FALSE	FALSE	FALSE	0	2	1	0	1	0	0	0	1	2	3	2	1	2	0	1	2	0	0	1	0	1	0	4
chr1	60280000	60290000	10001	*	chr1	60760000	60770000	10001	*	TRUE	TRUE	TRUE	TRUE	3.51543	loop_587	490000	7.70833	19	-0.823679	-0.296071	0.527608	0.212396	FALSE	FALSE	FALSE	10	19	12	13	6	3	7	7	9	8	6	7	8	2	3	4	8	6	4	15	10	6	5	7
chr1	60840000	60850000	10001	*	chr1	61040000	61050000	10001	*	TRUE	FALSE	TRUE	TRUE	4.10911	loop_588	210000	5.75	13	-0.331806	0.654417	0.986224	0.131969	FALSE	FALSE	FALSE	7	8	7	7	2	4	3	3	6	6	6	6	4	1	2	4	5	9	7	8	6	8	6	13
chr1	60840000	60850000	10001	*	chr1	61450000	61460000	10001	*	FALSE	FALSE	FALSE	TRUE	3.52681	loop_589	620000	3.625	10	1.22602	1.31119	0.085164	0.143894	FALSE	FALSE	FALSE	2	1	0	3	4	2	1	1	5	6	5	10	4	3	2	1	4	3	5	1	8	6	4	6
chr1	60850000	60860000	10001	*	chr1	61850000	61860000	10001	*	FALSE	TRUE	FALSE	TRUE	3.61965	loop_590	1010000	2.95833	8	1.08058	-0.174073	-1.25465	0.148046	FALSE	FALSE	FALSE	3	3	2	5	1	1	0	2	2	6	8	5	6	3	5	3	1	2	1	1	4	1	5	1
chr1	60850000	60860000	10001	*	chr1	61580000	61590000	10001	*	FALSE	TRUE	TRUE	TRUE	3.01107	loop_591	740000	3.75	9	0.426927	0.906451	0.479524	0.407897	FALSE	FALSE	FALSE	4	3	5	3	0	3	1	2	3	7	9	2	3	0	4	3	7	2	4	4	5	6	7	3
chr1	60970000	60980000	10001	*	chr1	61040000	61050000	10001	*	TRUE	FALSE	FALSE	TRUE	3.16818	loop_592	80000	11.4167	24	-0.331727	-0.835235	-0.503507	0.0843261	FALSE	FALSE	FALSE	15	21	20	15	9	10	12	10	24	19	11	15	7	8	7	7	6	7	3	9	6	15	7	11
chr1	60970000	60980000	10001	*	chr1	61450000	61460000	10001	*	TRUE	TRUE	TRUE	TRUE	3.09937	loop_593	490000	8.45833	16	0.518578	-0.10231	-0.620888	0.291672	FALSE	FALSE	FALSE	11	12	7	11	3	7	3	4	15	16	16	7	12	12	7	4	4	3	6	5	13	7	7	11
chr1	60970000	60980000	10001	*	chr1	61580000	61590000	10001	*	FALSE	TRUE	FALSE	TRUE	2.90576	loop_594	620000	6.70833	17	0.567808	0.295379	-0.272428	0.517815	FALSE	FALSE	FALSE	5	7	4	9	6	5	2	3	17	13	8	8	7	7	5	2	5	5	2	5	10	8	8	10
chr1	60970000	60980000	10001	*	chr1	61850000	61860000	10001	*	TRUE	TRUE	FALSE	TRUE	3.78539	loop_595	890000	3.95833	11	0.152478	-0.961753	-1.11423	0.242067	FALSE	FALSE	FALSE	11	5	4	8	3	1	1	3	6	7	8	8	2	3	5	3	0	4	2	3	0	1	3	4
chr1	60980000	60990000	10001	*	chr1	61340000	61350000	10001	*	FALSE	TRUE	FALSE	TRUE	2.81392	loop_596	370000	4.91667	14	0.920978	-0.169955	-1.09093	0.0975442	FALSE	FALSE	FALSE	3	6	5	5	3	1	4	3	14	9	8	6	2	4	12	6	2	5	2	4	5	1	3	5
chr1	61040000	61050000	10001	*	chr1	61590000	61600000	10001	*	TRUE	FALSE	TRUE	TRUE	3.28705	loop_597	560000	4.125	9	0.183031	0.302895	0.119864	0.892843	FALSE	FALSE	FALSE	3	3	5	6	4	4	1	2	8	5	7	6	2	3	3	1	2	2	3	6	4	3	7	9
chr1	61050000	61060000	10001	*	chr1	61230000	61240000	10001	*	FALSE	FALSE	TRUE	FALSE	2.81796	loop_598	190000	6.5	18	0.211472	0.458026	0.246554	0.675383	FALSE	FALSE	FALSE	10	6	8	6	4	2	3	3	10	6	9	9	3	4	6	5	7	3	5	2	18	8	8	11
chr1	61050000	61060000	10001	*	chr1	61330000	61340000	10001	*	FALSE	TRUE	TRUE	TRUE	3.51964	loop_599	290000	10.25	19	0.350042	-0.523377	-0.87342	0.0769476	FALSE	FALSE	FALSE	14	12	18	9	6	6	6	9	18	17	13	19	10	10	12	10	7	6	5	5	7	13	7	7
chr1	61050000	61060000	10001	*	chr1	61450000	61460000	10001	*	TRUE	TRUE	TRUE	TRUE	4.27957	loop_600	410000	8.875	16	0.0329118	0.106221	0.073309	0.969352	FALSE	FALSE	FALSE	6	12	7	11	5	9	8	7	13	12	12	16	7	4	5	4	6	7	4	6	16	12	13	11
chr1	61080000	61090000	10001	*	chr1	61140000	61150000	10001	*	FALSE	FALSE	TRUE	TRUE	2.26818	loop_601	70000	10.1667	20	0.0387276	-0.0188763	-0.057604	0.989829	FALSE	FALSE	FALSE	15	20	9	17	4	3	7	6	11	16	11	14	9	5	6	14	10	9	4	13	9	5	13	14
chr1	61080000	61090000	10001	*	chr1	61310000	61320000	10001	*	TRUE	FALSE	FALSE	FALSE	4.26268	loop_602	240000	6.91667	12	-0.040999	-0.587868	-0.546869	0.457373	FALSE	FALSE	FALSE	10	11	11	12	5	7	4	2	10	10	12	10	3	10	4	5	9	2	1	7	6	5	4	6
chr1	61220000	61230000	10001	*	chr1	61330000	61340000	10001	*	FALSE	FALSE	FALSE	TRUE	2.27658	loop_603	120000	7.125	15	0.11326	-0.19427	-0.30753	0.824572	FALSE	FALSE	FALSE	6	15	10	12	3	5	3	3	10	7	12	8	4	6	8	9	6	3	2	7	9	5	10	8
chr1	61330000	61340000	10001	*	chr1	61450000	61460000	10001	*	FALSE	FALSE	TRUE	TRUE	2.67243	loop_604	130000	6.95833	12	0.11608	0.622326	0.506246	0.364299	FALSE	FALSE	FALSE	10	9	6	7	3	4	3	4	12	11	9	4	6	3	5	4	8	9	9	9	7	9	7	9
chr1	61340000	61350000	10001	*	chr1	61840000	61850000	10001	*	FALSE	FALSE	FALSE	TRUE	2.51697	loop_605	510000	2.29167	7	-0.0339521	-0.904766	-0.870814	0.5616	FALSE	FALSE	FALSE	4	1	4	7	1	1	2	2	5	5	1	4	1	3	3	0	0	0	2	4	1	2	1	1
chr1	61350000	61360000	10001	*	chr1	61580000	61590000	10001	*	FALSE	FALSE	TRUE	TRUE	2.7932	loop_606	240000	4.45833	11	-0.469388	0.494821	0.96421	0.305971	FALSE	FALSE	FALSE	7	8	6	8	2	1	0	3	10	5	1	6	0	0	2	4	6	4	4	6	11	3	3	7
chr1	61460000	61470000	10001	*	chr1	61850000	61860000	10001	*	TRUE	FALSE	FALSE	TRUE	3.26721	loop_607	400000	3.33333	9	0.221121	-0.80006	-1.02118	0.385339	FALSE	FALSE	FALSE	9	1	4	6	4	1	1	3	4	6	5	4	3	3	2	7	0	0	2	5	1	2	5	2
chr1	61470000	61480000	10001	*	chr1	61590000	61600000	10001	*	TRUE	TRUE	FALSE	FALSE	2.87042	loop_608	130000	8.41667	21	0.0131368	-0.442448	-0.455584	0.555025	FALSE	FALSE	FALSE	16	12	10	9	6	3	8	7	12	21	9	14	12	2	5	4	4	6	5	6	7	10	5	9
chr1	61590000	61600000	10001	*	chr1	61850000	61860000	10001	*	FALSE	TRUE	FALSE	TRUE	2.59093	loop_609	270000	4.54167	10	0.17526	-0.95854	-1.1338	0.182211	FALSE	FALSE	FALSE	8	7	0	3	3	3	8	7	4	10	6	8	6	6	5	3	4	3	3	1	5	4	1	1
chr1	61920000	61930000	10001	*	chr1	62400000	62410000	10001	*	TRUE	FALSE	FALSE	FALSE	3.11585	loop_610	490000	1.41667	4	-0.464904	-1.56473	-1.09983	0.37274	FALSE	FALSE	FALSE	1	1	3	4	1	1	1	4	3	2	1	1	1	1	0	3	1	0	0	0	2	0	2	1
chr1	61940000	61950000	10001	*	chr1	62130000	62140000	10001	*	TRUE	FALSE	FALSE	TRUE	3.56784	loop_611	200000	2.79167	6	0.213205	-0.249246	-0.462451	0.829039	FALSE	FALSE	FALSE	2	4	3	4	3	2	2	1	4	2	4	3	2	3	2	6	2	1	2	1	4	3	4	3
chr1	61950000	61960000	10001	*	chr1	62070000	62080000	10001	*	TRUE	TRUE	TRUE	TRUE	2.90806	loop_612	130000	6.91667	16	0.56418	0.120406	-0.443774	0.47102	FALSE	FALSE	FALSE	11	10	8	5	4	5	3	0	8	13	8	16	6	6	8	6	8	3	5	5	10	5	5	8
chr1	62080000	62090000	10001	*	chr1	62130000	62140000	10001	*	TRUE	TRUE	TRUE	TRUE	3.3643	loop_613	60000	13.9167	26	-0.0265265	-1.12203	-1.0955	0.000525422	FALSE	TRUE	TRUE	20	19	21	24	7	15	10	16	24	23	26	17	14	8	15	13	7	7	7	5	13	12	5	6
chr1	62170000	62180000	10001	*	chr1	62290000	62300000	10001	*	FALSE	TRUE	FALSE	FALSE	2.56336	loop_614	130000	7.83333	16	-0.010711	-0.131893	-0.121182	0.95432	FALSE	FALSE	FALSE	10	14	10	5	7	5	5	7	16	8	9	10	8	4	7	6	10	14	5	4	8	5	5	6
chr1	62170000	62180000	10001	*	chr1	62400000	62410000	10001	*	TRUE	TRUE	TRUE	TRUE	10.3512	loop_615	240000	22.25	37	-0.0376151	-0.196836	-0.159221	0.772604	FALSE	FALSE	FALSE	27	32	17	28	17	16	19	22	37	35	37	24	17	14	15	12	19	9	10	19	31	20	27	30
chr1	62170000	62180000	10001	*	chr1	62750000	62760000	10001	*	FALSE	TRUE	TRUE	TRUE	3.63041	loop_616	590000	1.70833	6	0.878159	-0.0747357	-0.952895	0.559016	FALSE	FALSE	FALSE	2	0	1	2	0	4	0	1	6	1	1	4	3	3	1	1	1	0	1	0	1	2	3	3
chr1	62290000	62300000	10001	*	chr1	62400000	62410000	10001	*	TRUE	TRUE	FALSE	TRUE	3.37397	loop_617	120000	12.0417	24	-0.00110936	-0.740734	-0.739625	0.068341	FALSE	FALSE	FALSE	17	17	10	21	9	9	11	13	18	20	16	24	4	10	11	13	8	5	5	8	11	9	9	11
chr1	62500000	62510000	10001	*	chr1	62740000	62750000	10001	*	TRUE	TRUE	TRUE	TRUE	5.28063	loop_618	250000	12.625	21	0.0384913	-0.180476	-0.218968	0.821799	FALSE	FALSE	FALSE	20	17	16	18	9	3	8	10	18	19	19	14	10	11	15	5	9	7	9	8	21	10	12	15
chr1	62840000	62850000	10001	*	chr1	63440000	63450000	10001	*	TRUE	FALSE	FALSE	TRUE	4.21123	loop_619	610000	3.625	12	-0.256181	0.066032	0.322213	0.884144	FALSE	FALSE	FALSE	12	4	5	4	2	2	1	1	5	5	3	6	2	2	2	2	3	2	4	4	4	5	2	5
chr1	62840000	62850000	10001	*	chr1	63530000	63540000	10001	*	FALSE	TRUE	FALSE	TRUE	3.77476	loop_620	700000	2.625	7	0.564808	0.731219	0.166411	0.680554	FALSE	FALSE	FALSE	5	3	2	3	1	0	1	0	5	4	6	4	1	1	2	1	1	2	1	1	5	7	5	2
chr1	62910000	62920000	10001	*	chr1	63160000	63170000	10001	*	FALSE	TRUE	FALSE	TRUE	2.22555	loop_621	260000	5.04167	9	0.514463	-0.301651	-0.816113	0.319735	FALSE	FALSE	FALSE	8	5	4	5	1	4	6	3	6	8	9	9	7	6	6	4	4	3	5	3	6	3	2	4
chr1	62950000	62960000	10001	*	chr1	63430000	63440000	10001	*	TRUE	FALSE	FALSE	FALSE	2.65956	loop_622	490000	3.04167	7	-0.507744	-0.146566	0.361178	0.802295	FALSE	FALSE	FALSE	2	7	5	5	3	3	1	1	6	7	1	2	0	3	1	1	0	1	1	3	5	3	6	6
chr1	62960000	62970000	10001	*	chr1	63540000	63550000	10001	*	FALSE	FALSE	TRUE	TRUE	2.80314	loop_623	590000	2.125	8	0.966523	0.757023	-0.2095	0.591344	FALSE	FALSE	FALSE	2	0	3	1	1	2	0	1	1	3	4	8	2	0	3	1	1	0	0	3	5	4	3	3
chr1	62960000	62970000	10001	*	chr1	63150000	63160000	10001	*	TRUE	FALSE	FALSE	TRUE	3.00429	loop_624	200000	8.5	15	0.0696342	-0.150063	-0.219697	0.881102	FALSE	FALSE	FALSE	13	9	6	15	3	5	4	13	15	11	10	15	4	7	6	8	8	5	6	9	7	9	8	8
chr1	63000000	63010000	10001	*	chr1	63140000	63150000	10001	*	TRUE	TRUE	TRUE	TRUE	2.22318	loop_625	150000	10.7917	27	0.753242	0.246772	-0.506471	0.150478	FALSE	FALSE	FALSE	9	14	12	16	4	5	7	0	20	19	17	27	6	8	8	14	14	5	14	5	7	8	10	10
chr1	63000000	63010000	10001	*	chr1	63440000	63450000	10001	*	FALSE	FALSE	FALSE	TRUE	2.92791	loop_626	450000	4.16667	11	0.53635	0.49631	-0.0400396	0.678675	FALSE	FALSE	FALSE	5	3	2	7	2	3	1	2	3	8	8	4	6	3	2	3	3	2	1	6	8	5	2	11
chr1	63180000	63190000	10001	*	chr1	63430000	63440000	10001	*	TRUE	FALSE	FALSE	TRUE	2.37564	loop_627	260000	3.95833	11	-0.491961	0.203041	0.695002	0.573638	FALSE	FALSE	FALSE	5	4	11	8	1	2	1	2	1	2	4	4	5	3	3	2	4	6	3	3	4	4	7	6
chr1	63180000	63190000	10001	*	chr1	63530000	63540000	10001	*	FALSE	FALSE	FALSE	TRUE	2.3704	loop_628	360000	2.58333	7	0.70973	0.914392	0.204661	0.550581	FALSE	FALSE	FALSE	5	1	2	1	1	0	2	1	1	5	4	5	2	3	0	3	1	2	1	4	4	4	7	3
chr1	63310000	63320000	10001	*	chr1	63530000	63540000	10001	*	FALSE	TRUE	TRUE	TRUE	2.80528	loop_629	230000	4.04167	9	0.926415	1.02876	0.102343	0.26304	FALSE	FALSE	FALSE	6	1	6	1	1	3	0	1	6	6	7	4	6	3	4	2	4	3	4	3	9	1	9	7
chr1	63320000	63330000	10001	*	chr1	63440000	63450000	10001	*	FALSE	FALSE	TRUE	TRUE	3.48153	loop_630	130000	7.54167	17	-0.0470596	0.595916	0.642976	0.328227	FALSE	FALSE	FALSE	5	2	10	2	8	2	10	10	9	10	4	8	5	4	8	3	6	7	7	11	13	12	8	17
chr1	63560000	63570000	10001	*	chr1	64240000	64250000	10001	*	FALSE	FALSE	TRUE	FALSE	4.86354	loop_631	690000	6	14	0.222423	0.884178	0.661755	0.185959	FALSE	FALSE	FALSE	7	6	9	3	1	3	3	3	8	6	10	5	2	7	4	2	6	6	6	5	14	10	8	10
chr1	63610000	63620000	10001	*	chr1	63780000	63790000	10001	*	FALSE	FALSE	TRUE	TRUE	2.61834	loop_632	180000	4.625	9	-0.181467	0.408675	0.590141	0.612865	FALSE	FALSE	FALSE	3	3	7	9	4	4	3	0	6	8	3	4	6	0	4	1	5	3	3	4	8	9	8	6
chr1	63610000	63620000	10001	*	chr1	63670000	63680000	10001	*	TRUE	FALSE	FALSE	FALSE	2.53051	loop_633	70000	12.125	20	-0.171103	-0.182283	-0.0111798	0.856672	FALSE	FALSE	FALSE	15	20	11	19	8	11	6	12	15	18	11	10	9	16	8	9	6	7	11	13	17	12	13	14
chr1	63610000	63620000	10001	*	chr1	63920000	63930000	10001	*	TRUE	TRUE	FALSE	TRUE	2.77164	loop_634	320000	4.375	10	-0.243966	0.198113	0.442079	0.784308	FALSE	FALSE	FALSE	7	3	6	4	5	4	2	2	10	5	4	1	4	2	2	3	8	2	0	3	6	6	7	9
chr1	63610000	63620000	10001	*	chr1	64240000	64250000	10001	*	TRUE	TRUE	TRUE	TRUE	8.9132	loop_635	640000	16.7083	36	0.0218407	-0.00498251	-0.0268232	0.996423	FALSE	FALSE	FALSE	15	16	18	27	15	9	15	13	36	21	22	27	10	13	9	8	20	14	12	18	17	13	19	14
chr1	63620000	63630000	10001	*	chr1	64150000	64160000	10001	*	TRUE	TRUE	TRUE	TRUE	2.78777	loop_636	540000	6.375	14	0.39016	0.0754034	-0.314756	0.715862	FALSE	FALSE	FALSE	6	7	8	5	6	2	5	4	11	12	14	7	6	5	2	5	5	3	2	5	8	5	9	11
chr1	63680000	63690000	10001	*	chr1	63760000	63770000	10001	*	TRUE	FALSE	FALSE	FALSE	2.22074	loop_637	90000	7.08333	11	-0.249804	-0.587533	-0.337729	0.480076	FALSE	FALSE	FALSE	11	10	10	11	8	3	7	6	11	11	6	9	6	5	6	6	8	6	6	3	5	7	4	5
chr1	63690000	63700000	10001	*	chr1	63860000	63870000	10001	*	FALSE	FALSE	TRUE	FALSE	2.52034	loop_638	180000	5.125	11	-0.404356	0.555396	0.959752	0.259247	FALSE	FALSE	FALSE	6	5	6	5	10	0	3	2	3	8	4	3	4	4	3	1	5	3	9	6	10	9	3	11
chr1	63690000	63700000	10001	*	chr1	63910000	63920000	10001	*	TRUE	TRUE	TRUE	TRUE	3.17223	loop_639	230000	8.29167	17	0.289723	0.0307986	-0.258924	0.806945	FALSE	FALSE	FALSE	7	15	8	12	6	7	5	0	15	14	17	8	7	5	6	7	6	7	2	10	6	2	16	11
chr1	63690000	63700000	10001	*	chr1	64140000	64150000	10001	*	TRUE	TRUE	TRUE	TRUE	3.65708	loop_640	460000	8.33333	15	0.593403	0.912736	0.319333	0.124308	FALSE	FALSE	FALSE	13	6	5	8	4	2	4	3	12	15	14	13	3	4	6	7	10	11	5	9	8	12	15	11
chr1	63690000	63700000	10001	*	chr1	64240000	64250000	10001	*	TRUE	TRUE	TRUE	TRUE	6.2902	loop_641	560000	11.875	21	0.332751	0.613446	0.280695	0.255929	FALSE	FALSE	FALSE	9	12	15	17	5	6	3	7	19	17	21	14	10	6	7	7	15	11	11	9	19	16	13	16
chr1	63770000	63780000	10001	*	chr1	63920000	63930000	10001	*	FALSE	TRUE	FALSE	TRUE	2.31738	loop_642	160000	6.375	15	-0.0306847	0.0849688	0.115653	0.976206	FALSE	FALSE	FALSE	6	5	10	8	3	5	4	7	3	15	12	5	7	6	2	2	7	7	4	2	10	4	6	13
chr1	63770000	63780000	10001	*	chr1	64130000	64140000	10001	*	TRUE	TRUE	TRUE	TRUE	3.51579	loop_643	370000	10.4583	23	0.284843	-0.233998	-0.518841	0.444555	FALSE	FALSE	FALSE	11	9	16	13	9	3	8	9	15	17	13	15	12	9	8	11	2	3	9	8	10	7	23	11
chr1	63770000	63780000	10001	*	chr1	64240000	64250000	10001	*	TRUE	TRUE	TRUE	TRUE	3.75871	loop_644	480000	6.83333	12	0.212636	-0.0935298	-0.306165	0.816271	FALSE	FALSE	FALSE	7	12	7	4	3	10	5	3	8	10	11	12	7	6	5	4	2	6	2	8	8	7	6	11
chr1	63840000	63850000	10001	*	chr1	64130000	64140000	10001	*	FALSE	FALSE	TRUE	FALSE	2.67319	loop_645	300000	6.41667	12	-0.368752	0.520314	0.889066	0.207277	FALSE	FALSE	FALSE	9	9	5	9	4	2	3	6	2	9	3	5	9	4	4	2	5	7	5	12	7	11	10	12
chr1	63920000	63930000	10001	*	chr1	64130000	64140000	10001	*	TRUE	TRUE	TRUE	TRUE	3.96018	loop_646	220000	10.2083	17	0.255253	-0.431495	-0.686748	0.227635	FALSE	FALSE	FALSE	17	12	14	16	5	5	4	9	13	17	15	14	13	11	11	8	10	4	5	7	7	8	8	12
chr1	63920000	63930000	10001	*	chr1	64240000	64250000	10001	*	TRUE	TRUE	FALSE	TRUE	4.93773	loop_647	330000	4.79167	9	0.000252845	-0.00158924	-0.00184208	1	FALSE	FALSE	FALSE	8	7	9	5	2	4	2	1	8	5	7	6	2	6	2	4	4	0	2	9	7	4	6	5
chr1	64040000	64050000	10001	*	chr1	64130000	64140000	10001	*	TRUE	TRUE	FALSE	TRUE	3.14219	loop_648	100000	10.875	24	0.0300309	-0.35624	-0.386271	0.590231	FALSE	FALSE	FALSE	20	17	13	12	9	3	5	11	17	17	24	13	10	7	7	5	11	4	6	4	14	6	11	15
chr1	64150000	64160000	10001	*	chr1	64240000	64250000	10001	*	TRUE	TRUE	FALSE	TRUE	3.61258	loop_649	100000	7.33333	18	0.0592621	-0.258426	-0.317688	0.803532	FALSE	FALSE	FALSE	7	14	7	18	4	4	2	4	10	11	8	9	5	4	11	6	3	2	4	4	10	10	6	13
chr1	64260000	64270000	10001	*	chr1	64580000	64590000	10001	*	TRUE	FALSE	TRUE	TRUE	3.24114	loop_650	330000	6.08333	12	-0.315244	0.404372	0.719616	0.415059	FALSE	FALSE	FALSE	7	4	7	10	3	6	3	6	5	8	4	2	9	4	4	3	7	12	4	9	6	4	11	8
chr1	64260000	64270000	10001	*	chr1	64820000	64830000	10001	*	TRUE	TRUE	TRUE	TRUE	6.41497	loop_651	570000	7.79167	17	0.129835	-0.16693	-0.296765	0.82175	FALSE	FALSE	FALSE	5	12	13	13	7	4	6	1	9	9	17	9	8	6	7	6	5	3	5	7	5	12	9	9
chr1	64270000	64280000	10001	*	chr1	64480000	64490000	10001	*	FALSE	FALSE	TRUE	TRUE	4.10953	loop_652	220000	3.66667	12	-0.374359	1.01313	1.38749	0.0755322	FALSE	FALSE	FALSE	3	5	3	5	0	4	1	2	2	3	2	6	2	2	1	1	8	6	2	3	8	5	2	12
chr1	64270000	64280000	10001	*	chr1	64670000	64680000	10001	*	TRUE	TRUE	TRUE	TRUE	5.27232	loop_653	410000	4.70833	10	0.0284301	0.267517	0.239087	0.882603	FALSE	FALSE	FALSE	10	3	6	3	2	3	3	4	5	9	4	5	5	2	3	4	5	3	2	7	8	5	7	5
chr1	64270000	64280000	10001	*	chr1	64430000	64440000	10001	*	FALSE	TRUE	FALSE	FALSE	3.50393	loop_654	170000	3.16667	8	0.810999	0.441614	-0.369385	0.550384	FALSE	FALSE	FALSE	4	2	3	5	2	1	1	0	3	5	2	3	5	3	5	6	3	2	4	2	8	2	2	3
chr1	64270000	64280000	10001	*	chr1	64970000	64980000	10001	*	TRUE	FALSE	FALSE	FALSE	3.33485	loop_655	710000	0.708333	3	-0.975122	-0.607759	0.367363	0.785385	FALSE	FALSE	FALSE	1	1	0	3	1	0	1	1	1	0	1	1	0	1	0	0	1	1	0	1	0	2	0	0
chr1	64270000	64280000	10001	*	chr1	65020000	65030000	10001	*	FALSE	TRUE	FALSE	FALSE	3.4149	loop_656	760000	0.75	3	1.06021	-0.563455	-1.62367	0.496594	FALSE	FALSE	FALSE	0	0	1	2	0	1	0	1	1	2	1	0	2	0	1	3	0	0	1	1	1	0	0	0
chr1	64290000	64300000	10001	*	chr1	64340000	64350000	10001	*	FALSE	FALSE	TRUE	TRUE	2.09531	loop_657	60000	10.0833	16	-0.119843	-0.0276041	0.0922393	0.953141	FALSE	FALSE	FALSE	14	8	12	15	9	4	13	5	16	10	15	16	4	5	11	4	8	8	6	7	15	10	16	11
chr1	64470000	64480000	10001	*	chr1	64670000	64680000	10001	*	TRUE	FALSE	FALSE	FALSE	2.21143	loop_658	210000	6.58333	11	-0.0385701	-0.436104	-0.397534	0.647042	FALSE	FALSE	FALSE	7	11	9	7	3	6	7	6	11	6	11	10	5	8	5	3	4	5	3	5	9	4	5	8
chr1	64480000	64490000	10001	*	chr1	64820000	64830000	10001	*	FALSE	TRUE	TRUE	TRUE	2.98897	loop_659	350000	3.54167	9	0.579726	0.676877	0.097151	0.634152	FALSE	FALSE	FALSE	1	7	3	2	1	2	1	2	8	6	3	3	6	1	2	2	1	0	3	2	9	9	4	7
chr1	64680000	64690000	10001	*	chr1	64820000	64830000	10001	*	TRUE	TRUE	TRUE	TRUE	4.826	loop_660	150000	12.4583	19	-0.272377	-0.100356	0.172021	0.752806	FALSE	FALSE	FALSE	16	19	13	15	5	13	12	12	17	17	12	15	8	9	9	7	7	10	14	13	11	12	15	18
chr1	64830000	64840000	10001	*	chr1	65680000	65690000	10001	*	FALSE	FALSE	TRUE	FALSE	3.86447	loop_661	860000	1.58333	4	1.43921	1.82531	0.386096	0.244012	FALSE	FALSE	FALSE	1	0	0	0	2	1	1	0	1	4	2	2	2	1	2	1	3	4	2	2	1	2	1	3
chr1	64860000	64870000	10001	*	chr1	64960000	64970000	10001	*	FALSE	TRUE	FALSE	FALSE	2.57099	loop_662	110000	11.2083	23	0.424045	0.153044	-0.271002	0.538333	FALSE	FALSE	FALSE	14	7	11	17	6	8	8	4	19	15	23	17	7	12	9	7	5	12	7	8	14	12	8	19
chr1	64890000	64900000	10001	*	chr1	64960000	64970000	10001	*	TRUE	FALSE	FALSE	TRUE	2.03728	loop_663	80000	12.4583	25	-0.089834	-0.427108	-0.337274	0.508328	FALSE	FALSE	FALSE	21	25	15	19	5	7	7	10	18	21	18	16	12	8	8	8	7	11	5	3	20	9	12	14
chr1	65060000	65070000	10001	*	chr1	65440000	65450000	10001	*	FALSE	FALSE	TRUE	TRUE	3.00628	loop_664	390000	2.54167	6	-0.235138	0.410289	0.645427	0.72561	FALSE	FALSE	FALSE	3	4	3	3	1	1	3	1	3	6	2	3	2	1	1	0	3	3	2	3	0	3	4	6
chr1	65060000	65070000	10001	*	chr1	65200000	65210000	10001	*	TRUE	TRUE	TRUE	TRUE	5.72888	loop_665	150000	14.125	24	-0.21766	-0.333999	-0.116339	0.617013	FALSE	FALSE	FALSE	21	17	18	22	17	12	4	13	24	18	15	17	8	12	13	8	13	10	8	12	11	14	14	18
chr1	65060000	65070000	10001	*	chr1	65680000	65690000	10001	*	TRUE	TRUE	TRUE	TRUE	5.33201	loop_666	630000	5.75	11	-0.0275404	0.146429	0.173969	0.941045	FALSE	FALSE	FALSE	6	9	7	4	4	3	3	7	10	5	8	11	5	3	4	1	6	6	3	6	5	5	8	9
chr1	65080000	65090000	10001	*	chr1	65420000	65430000	10001	*	TRUE	FALSE	FALSE	FALSE	3.18212	loop_667	350000	2.04167	7	-1.99868	-0.712218	1.28646	0.14046	FALSE	FALSE	FALSE	1	1	2	7	2	5	4	1	1	2	0	0	1	3	0	0	1	2	1	0	6	6	1	2
chr1	65130000	65140000	10001	*	chr1	65200000	65210000	10001	*	TRUE	FALSE	TRUE	TRUE	2.25157	loop_668	80000	10.3333	18	-0.328612	0.215212	0.543825	0.429682	FALSE	FALSE	FALSE	17	16	16	11	6	10	4	3	8	14	10	14	10	8	4	2	7	9	14	5	18	9	17	16
chr1	65230000	65240000	10001	*	chr1	65680000	65690000	10001	*	TRUE	TRUE	TRUE	TRUE	7.24507	loop_669	460000	11.2083	25	-0.366832	0.0876144	0.454447	0.507214	FALSE	FALSE	FALSE	18	15	11	16	11	5	8	8	16	19	6	10	5	2	12	7	11	7	11	11	14	14	7	25
chr1	65250000	65260000	10001	*	chr1	65420000	65430000	10001	*	TRUE	TRUE	TRUE	TRUE	2.9128	loop_670	180000	8.20833	14	0.197931	0.425656	0.227725	0.665821	FALSE	FALSE	FALSE	13	13	3	8	6	5	2	6	12	14	10	10	9	3	9	2	6	9	12	10	13	8	5	9
chr1	65430000	65440000	10001	*	chr1	65680000	65690000	10001	*	TRUE	TRUE	FALSE	TRUE	3.86859	loop_671	260000	7.16667	14	-0.389936	-0.453411	-0.0634747	0.582164	FALSE	FALSE	FALSE	9	10	11	14	5	7	3	8	10	6	10	10	7	7	3	2	8	4	2	5	7	5	10	9
chr1	65710000	65720000	10001	*	chr1	65940000	65950000	10001	*	FALSE	TRUE	TRUE	TRUE	2.70107	loop_672	240000	5.54167	13	0.808039	0.0229253	-0.785113	0.212847	FALSE	FALSE	FALSE	11	4	4	5	1	2	5	2	13	9	6	9	5	4	10	7	2	5	4	1	5	6	4	9
chr1	65710000	65720000	10001	*	chr1	66240000	66250000	10001	*	TRUE	TRUE	TRUE	TRUE	4.55471	loop_673	540000	3.625	11	0.658637	1.0565	0.397866	0.334912	FALSE	FALSE	FALSE	6	3	2	1	1	0	3	2	6	6	6	5	2	0	2	4	3	5	2	4	11	2	3	8
chr1	65720000	65730000	10001	*	chr1	65890000	65900000	10001	*	FALSE	FALSE	TRUE	FALSE	2.90208	loop_674	180000	5.20833	10	0.185893	0.972091	0.786198	0.172492	FALSE	FALSE	FALSE	3	10	4	2	1	0	5	5	8	5	9	7	2	2	3	2	5	8	7	6	10	7	4	10
chr1	65750000	65760000	10001	*	chr1	65920000	65930000	10001	*	FALSE	TRUE	FALSE	FALSE	3.10249	loop_675	180000	5.58333	13	0.706693	0.372437	-0.334255	0.438128	FALSE	FALSE	FALSE	5	6	6	6	0	3	2	5	6	13	12	7	6	8	3	3	8	3	2	3	8	6	6	7
chr1	65950000	65960000	10001	*	chr1	66240000	66250000	10001	*	TRUE	TRUE	TRUE	TRUE	11.308	loop_676	300000	19.2917	33	-0.195743	-0.0298676	0.165875	0.799362	FALSE	FALSE	FALSE	27	29	29	33	6	17	11	10	16	30	27	32	15	16	7	8	26	13	15	15	25	20	12	24
chr1	65950000	65960000	10001	*	chr1	66440000	66450000	10001	*	TRUE	TRUE	TRUE	TRUE	4.86949	loop_677	500000	7.5	14	0.0859684	0.0306524	-0.055316	0.982425	FALSE	FALSE	FALSE	9	12	9	11	7	3	2	4	8	13	10	14	5	6	6	3	5	7	5	3	11	9	6	12
chr1	65960000	65970000	10001	*	chr1	66720000	66730000	10001	*	TRUE	TRUE	TRUE	FALSE	3.17119	loop_678	770000	2.29167	6	0.270172	0.737662	0.467491	0.679602	FALSE	FALSE	FALSE	2	3	2	3	1	1	1	1	4	4	1	2	1	2	1	3	2	6	0	3	3	2	3	4
chr1	65970000	65980000	10001	*	chr1	66660000	66670000	10001	*	FALSE	FALSE	TRUE	FALSE	2.87624	loop_679	700000	1.66667	6	-2.13245	0.71976	2.85221	0.0343961	FALSE	FALSE	FALSE	3	1	4	2	1	0	0	3	0	1	0	0	0	2	0	0	3	2	3	2	1	1	5	6
chr1	66250000	66260000	10001	*	chr1	66440000	66450000	10001	*	TRUE	TRUE	TRUE	TRUE	10.2792	loop_680	200000	29.3333	53	-0.147256	-0.22769	-0.0804335	0.649585	FALSE	FALSE	FALSE	35	48	40	45	16	17	16	32	38	53	39	32	15	25	24	17	22	26	21	16	37	29	33	28
chr1	66250000	66260000	10001	*	chr1	66720000	66730000	10001	*	TRUE	TRUE	TRUE	TRUE	3.8569	loop_681	480000	5	14	0.395919	0.367954	-0.0279654	0.763855	FALSE	FALSE	FALSE	6	5	5	4	4	3	2	3	9	14	9	5	0	4	4	3	7	5	4	3	4	7	3	7
chr1	66260000	66270000	10001	*	chr1	66330000	66340000	10001	*	TRUE	TRUE	TRUE	TRUE	3.2527	loop_682	80000	15.9583	33	-0.431063	-0.708959	-0.277896	0.0725742	FALSE	FALSE	FALSE	16	28	22	33	16	11	16	15	24	24	18	26	8	6	10	12	9	4	14	10	16	12	19	14
chr1	66260000	66270000	10001	*	chr1	66920000	66930000	10001	*	FALSE	FALSE	FALSE	TRUE	2.39784	loop_683	670000	1.58333	4	0.0545575	-0.751568	-0.806125	0.716817	FALSE	FALSE	FALSE	1	2	2	1	0	3	1	4	1	2	1	4	2	3	2	0	1	0	1	2	0	1	3	1
chr1	66260000	66270000	10001	*	chr1	66950000	66960000	10001	*	TRUE	FALSE	FALSE	FALSE	3.07069	loop_684	700000	1.16667	3	-1.1998	-1.52189	-0.322092	0.358789	FALSE	FALSE	FALSE	2	0	1	3	2	2	3	2	2	0	1	2	0	2	0	0	0	1	1	0	0	1	1	2
chr1	66360000	66370000	10001	*	chr1	66440000	66450000	10001	*	FALSE	TRUE	FALSE	TRUE	2.09087	loop_685	90000	9.375	17	0.0369718	-0.106732	-0.143703	0.94784	FALSE	FALSE	FALSE	17	17	8	11	4	4	8	5	9	14	11	16	8	3	12	7	8	5	5	5	12	16	4	16
chr1	66450000	66460000	10001	*	chr1	66500000	66510000	10001	*	TRUE	FALSE	FALSE	FALSE	2.33264	loop_686	60000	11.9167	23	-0.283031	-0.444251	-0.16122	0.53169	FALSE	FALSE	FALSE	17	23	23	20	10	10	7	2	18	13	14	23	13	10	4	3	6	12	11	11	13	9	5	9
chr1	66510000	66520000	10001	*	chr1	66720000	66730000	10001	*	TRUE	TRUE	TRUE	TRUE	3.44548	loop_687	220000	7.75	15	0.161139	-0.449874	-0.611013	0.402566	FALSE	FALSE	FALSE	14	7	9	7	7	5	8	5	15	14	14	9	4	7	7	6	2	4	7	3	9	6	10	7
chr1	66760000	66770000	10001	*	chr1	66920000	66930000	10001	*	FALSE	TRUE	TRUE	TRUE	2.96599	loop_688	170000	7.625	14	0.0249621	0.321869	0.296907	0.761298	FALSE	FALSE	FALSE	14	13	10	6	5	6	2	0	8	9	7	7	7	3	8	9	6	8	6	8	9	12	7	13
chr1	66760000	66770000	10001	*	chr1	67150000	67160000	10001	*	TRUE	TRUE	TRUE	TRUE	4.23952	loop_689	400000	4.58333	11	0.324878	-0.234994	-0.559872	0.662323	FALSE	FALSE	FALSE	8	5	10	2	2	3	2	3	11	4	5	10	4	5	4	3	4	5	3	1	5	1	7	3
chr1	66760000	66770000	10001	*	chr1	67210000	67220000	10001	*	FALSE	FALSE	FALSE	TRUE	3.46846	loop_690	460000	3.875	9	-0.173561	0.446116	0.619677	0.629108	FALSE	FALSE	FALSE	6	9	7	4	2	1	0	1	6	5	5	6	2	3	1	0	3	5	3	3	6	6	6	3
chr1	66810000	66820000	10001	*	chr1	66890000	66900000	10001	*	TRUE	FALSE	FALSE	FALSE	2.08094	loop_691	90000	6.95833	17	-0.637542	-0.177765	0.459778	0.429151	FALSE	FALSE	FALSE	13	17	7	9	1	5	8	5	6	8	8	10	5	1	6	1	4	5	5	5	9	10	8	11
chr1	66990000	67000000	10001	*	chr1	67150000	67160000	10001	*	TRUE	TRUE	TRUE	TRUE	6.3844	loop_692	170000	11.5417	24	-0.175881	-0.843565	-0.667683	0.0776138	FALSE	FALSE	FALSE	24	24	20	7	5	14	10	7	23	21	9	17	10	7	9	9	8	6	7	4	10	8	9	9
chr1	66990000	67000000	10001	*	chr1	67210000	67220000	10001	*	FALSE	FALSE	TRUE	TRUE	4.16661	loop_693	230000	7.95833	16	0.410525	0.982103	0.571578	0.0984347	FALSE	FALSE	FALSE	4	9	10	3	3	3	8	3	8	12	4	16	9	4	5	3	6	13	9	7	9	15	14	14
chr1	66990000	67000000	10001	*	chr1	67410000	67420000	10001	*	TRUE	TRUE	FALSE	TRUE	2.75598	loop_694	430000	2.04167	5	-0.0120565	0.871938	0.883995	0.525345	FALSE	FALSE	FALSE	2	4	2	2	0	3	0	0	1	3	3	3	0	0	2	2	2	1	5	2	4	1	3	4
chr1	67000000	67010000	10001	*	chr1	67500000	67510000	10001	*	FALSE	FALSE	FALSE	TRUE	3.00749	loop_695	510000	2.33333	6	1.52385	1.29823	-0.225619	0.226268	FALSE	FALSE	FALSE	1	2	0	2	1	1	1	0	3	5	3	1	2	2	3	5	0	4	0	1	4	6	4	5
chr1	67230000	67240000	10001	*	chr1	67500000	67510000	10001	*	TRUE	TRUE	TRUE	TRUE	5.97442	loop_696	280000	10.1667	21	0.370353	0.0280533	-0.3423	0.585036	FALSE	FALSE	FALSE	15	11	11	7	7	10	7	3	14	21	17	9	12	9	10	7	10	6	7	9	11	18	4	9
chr1	67340000	67350000	10001	*	chr1	67490000	67500000	10001	*	TRUE	TRUE	TRUE	TRUE	5.90227	loop_697	160000	14.3333	23	0.11206	0.228427	0.116366	0.816137	FALSE	FALSE	FALSE	21	15	12	14	3	11	16	10	21	22	16	19	11	8	12	11	23	11	14	7	19	17	15	16
chr1	67530000	67540000	10001	*	chr1	67760000	67770000	10001	*	TRUE	TRUE	TRUE	TRUE	8.95604	loop_698	240000	16	27	0.220084	0.414318	0.194234	0.446936	FALSE	FALSE	FALSE	22	9	15	20	9	12	7	12	20	18	24	19	11	15	10	15	12	18	13	16	27	17	21	22
chr1	67530000	67540000	10001	*	chr1	67830000	67840000	10001	*	TRUE	TRUE	FALSE	TRUE	5.1959	loop_699	310000	6.58333	16	0.643047	0.214243	-0.428804	0.440649	FALSE	FALSE	FALSE	7	1	6	8	1	7	5	5	16	14	15	8	4	7	4	3	4	7	3	7	10	4	6	6
chr1	67530000	67540000	10001	*	chr1	68110000	68120000	10001	*	TRUE	TRUE	TRUE	TRUE	4.92127	loop_700	590000	3.41667	8	-0.139156	-0.870619	-0.731463	0.481814	FALSE	FALSE	FALSE	4	7	1	5	2	3	4	6	5	8	4	3	5	2	3	1	0	0	2	6	4	0	3	4
chr1	67530000	67540000	10001	*	chr1	68340000	68350000	10001	*	TRUE	TRUE	TRUE	TRUE	4.04891	loop_701	820000	2.125	6	1.26724	0.0329933	-1.23424	0.208958	FALSE	FALSE	FALSE	1	3	2	1	1	1	0	2	6	2	3	6	3	4	2	2	1	1	1	2	1	2	0	4
chr1	67540000	67550000	10001	*	chr1	68050000	68060000	10001	*	FALSE	FALSE	TRUE	FALSE	4.29356	loop_702	520000	2.125	5	0.653042	1.44585	0.792812	0.272228	FALSE	FALSE	FALSE	1	1	0	3	1	1	1	1	1	5	1	1	1	2	2	2	0	4	0	5	4	4	5	5
chr1	67560000	67570000	10001	*	chr1	67620000	67630000	10001	*	FALSE	FALSE	TRUE	FALSE	2.17912	loop_703	70000	9.70833	18	-0.0849516	0.280777	0.365729	0.657464	FALSE	FALSE	FALSE	11	10	6	14	5	10	9	6	14	16	9	18	1	5	8	4	11	8	7	11	15	11	11	13
chr1	67560000	67570000	10001	*	chr1	67680000	67690000	10001	*	TRUE	TRUE	TRUE	TRUE	5.00667	loop_704	130000	14.5417	26	0.145104	-0.100832	-0.245936	0.780001	FALSE	FALSE	FALSE	24	15	14	17	4	10	14	13	26	19	23	26	15	11	6	9	17	11	14	7	14	9	18	13
chr1	67680000	67690000	10001	*	chr1	67760000	67770000	10001	*	TRUE	TRUE	TRUE	TRUE	4.31677	loop_705	90000	11.5833	22	0.160003	-0.338315	-0.498318	0.414431	FALSE	FALSE	FALSE	9	17	17	15	6	7	14	7	17	22	18	14	8	10	13	9	10	5	7	7	15	8	15	8
chr1	67680000	67690000	10001	*	chr1	67830000	67840000	10001	*	TRUE	TRUE	FALSE	TRUE	3.1825	loop_706	160000	5.54167	13	0.0155567	-0.464386	-0.479943	0.638406	FALSE	FALSE	FALSE	5	8	6	4	5	13	1	4	8	6	7	8	5	5	3	7	5	1	2	2	9	6	5	8
chr1	67760000	67770000	10001	*	chr1	67840000	67850000	10001	*	TRUE	TRUE	TRUE	TRUE	4.31936	loop_707	90000	16.5417	28	0.033308	0.448313	0.415005	0.261167	FALSE	FALSE	FALSE	19	16	18	13	11	14	11	11	26	21	22	21	11	10	7	10	18	19	13	22	22	18	16	28
chr1	67760000	67770000	10001	*	chr1	68010000	68020000	10001	*	FALSE	FALSE	TRUE	TRUE	3.74639	loop_708	260000	5.125	13	0.00511538	0.847287	0.842172	0.204502	FALSE	FALSE	FALSE	7	4	4	4	4	3	3	2	10	8	7	1	2	2	4	1	5	6	4	5	8	6	10	13
chr1	67760000	67770000	10001	*	chr1	68110000	68120000	10001	*	TRUE	TRUE	TRUE	TRUE	4.99739	loop_709	360000	5.29167	12	-0.199806	0.126307	0.326113	0.840764	FALSE	FALSE	FALSE	7	8	9	3	1	5	3	5	5	7	6	4	5	4	4	3	2	5	4	4	7	12	10	4
chr1	67850000	67860000	10001	*	chr1	68010000	68020000	10001	*	TRUE	TRUE	TRUE	TRUE	5.04974	loop_710	170000	14.9583	25	-0.453742	-0.20204	0.251702	0.411174	FALSE	FALSE	FALSE	18	12	23	23	12	18	12	14	19	25	14	21	5	8	9	7	11	18	9	10	24	17	12	18
chr1	67850000	67860000	10001	*	chr1	68110000	68120000	10001	*	TRUE	TRUE	TRUE	TRUE	7.66261	loop_711	270000	14.4167	29	0.0859352	-0.434511	-0.520446	0.288986	FALSE	FALSE	FALSE	22	19	21	18	4	15	14	7	19	29	20	26	18	10	9	7	10	11	8	8	15	9	13	14
chr1	67850000	67860000	10001	*	chr1	68340000	68350000	10001	*	TRUE	TRUE	TRUE	TRUE	4.44578	loop_712	500000	5.25	12	-0.45847	-0.103277	0.355193	0.717239	FALSE	FALSE	FALSE	8	5	5	5	7	8	5	2	6	12	5	6	2	1	2	3	4	3	5	5	9	3	9	6
chr1	68110000	68120000	10001	*	chr1	68340000	68350000	10001	*	TRUE	TRUE	TRUE	TRUE	8.86363	loop_713	240000	21.8333	36	0.0995725	0.407965	0.308393	0.292387	FALSE	FALSE	FALSE	32	23	23	31	14	9	9	12	36	29	27	24	13	18	14	14	34	23	13	24	30	27	19	26
chr1	68110000	68120000	10001	*	chr1	69730000	69740000	10001	*	FALSE	FALSE	FALSE	TRUE	3.99098	loop_714	1630000	1.20833	4	-0.0330155	0.922479	0.955494	0.640146	FALSE	FALSE	FALSE	3	4	0	0	1	0	0	0	1	1	1	1	0	2	1	0	2	2	1	0	4	3	0	2
chr1	68120000	68130000	10001	*	chr1	68230000	68240000	10001	*	FALSE	TRUE	FALSE	TRUE	2.83101	loop_715	120000	10.125	16	0.253397	0.46579	0.212393	0.52433	FALSE	FALSE	FALSE	15	10	12	9	6	7	2	6	10	16	16	16	9	4	7	8	11	8	14	9	14	12	12	10
chr1	68230000	68240000	10001	*	chr1	68340000	68350000	10001	*	TRUE	TRUE	FALSE	TRUE	2.57291	loop_716	120000	8.33333	16	-0.117716	-0.503967	-0.386251	0.518364	FALSE	FALSE	FALSE	12	10	8	15	9	3	10	6	12	8	16	12	9	7	5	4	5	5	3	7	11	6	7	10
chr1	68470000	68480000	10001	*	chr1	69730000	69740000	10001	*	TRUE	FALSE	TRUE	TRUE	4.99878	loop_717	1270000	4.04167	9	-0.251222	0.204757	0.45598	0.787478	FALSE	FALSE	FALSE	8	8	4	6	3	1	2	1	2	4	3	7	3	5	2	2	5	6	4	2	9	3	4	3
chr1	68600000	68610000	10001	*	chr1	69020000	69030000	10001	*	FALSE	FALSE	TRUE	FALSE	2.3431	loop_718	430000	2.5	9	-0.202503	1.61507	1.81758	0.0436052	FALSE	FALSE	FALSE	1	0	6	5	0	0	1	0	3	0	2	1	0	2	3	0	2	4	3	2	5	5	9	6
chr1	68600000	68610000	10001	*	chr1	69730000	69740000	10001	*	TRUE	TRUE	TRUE	TRUE	3.5812	loop_719	1140000	4.04167	9	-0.26604	-0.0473613	0.218678	0.908561	FALSE	FALSE	FALSE	9	4	3	6	2	2	3	4	6	4	3	1	4	6	2	3	3	2	4	2	6	3	7	8
chr1	68820000	68830000	10001	*	chr1	69730000	69740000	10001	*	FALSE	FALSE	TRUE	TRUE	2.96905	loop_720	920000	2.70833	8	-0.412484	0.691145	1.10363	0.395602	FALSE	FALSE	FALSE	8	2	1	3	0	1	2	2	5	5	3	0	1	1	1	0	3	1	4	2	5	2	8	5
chr1	68820000	68830000	10001	*	chr1	69700000	69710000	10001	*	FALSE	TRUE	FALSE	FALSE	3.71487	loop_721	890000	2.5	8	0.88189	0.432536	-0.449354	0.605001	FALSE	FALSE	FALSE	3	8	2	0	0	1	1	0	4	5	3	5	6	1	1	2	2	1	0	5	3	3	2	2
chr1	69390000	69400000	10001	*	chr1	69700000	69710000	10001	*	FALSE	FALSE	TRUE	FALSE	2.62578	loop_722	320000	2.08333	6	-0.592015	0.872046	1.46406	0.230399	FALSE	FALSE	FALSE	4	2	1	1	1	3	1	1	2	1	2	1	0	2	1	1	4	2	4	2	4	6	3	1
chr1	69880000	69890000	10001	*	chr1	69990000	70000000	10001	*	FALSE	TRUE	FALSE	FALSE	3.30394	loop_723	120000	1.91667	5	0.42656	-0.0971649	-0.523725	0.840677	FALSE	FALSE	FALSE	4	0	2	5	1	0	0	2	5	2	2	4	2	1	1	2	0	0	2	0	5	2	2	2
chr1	70030000	70040000	10001	*	chr1	70500000	70510000	10001	*	FALSE	TRUE	FALSE	TRUE	2.62621	loop_724	480000	3.70833	7	0.264977	-0.000445136	-0.265422	0.896364	FALSE	FALSE	FALSE	7	4	3	3	1	6	3	0	4	6	7	7	4	2	2	3	4	2	3	3	6	2	3	4
chr1	70130000	70140000	10001	*	chr1	70510000	70520000	10001	*	TRUE	TRUE	TRUE	TRUE	4.63926	loop_725	390000	8.08333	17	-0.149813	-0.170395	-0.0205816	0.921593	FALSE	FALSE	FALSE	9	9	14	12	6	3	6	9	10	7	17	7	6	7	9	3	9	5	4	10	5	12	6	9
chr1	70230000	70240000	10001	*	chr1	71050000	71060000	10001	*	TRUE	TRUE	TRUE	TRUE	5.06641	loop_726	830000	1.54167	7	0.318459	-0.308966	-0.627425	0.863414	FALSE	FALSE	FALSE	1	0	2	2	5	0	1	0	2	7	1	2	1	0	2	1	1	2	1	0	0	2	4	0
chr1	70260000	70270000	10001	*	chr1	70500000	70510000	10001	*	FALSE	FALSE	TRUE	TRUE	2.69908	loop_727	250000	5.375	11	-0.0655374	0.263386	0.328924	0.830179	FALSE	FALSE	FALSE	8	9	7	2	6	4	1	3	6	6	7	11	2	4	6	0	6	3	5	8	7	4	8	6
chr1	70530000	70540000	10001	*	chr1	71040000	71050000	10001	*	TRUE	TRUE	TRUE	TRUE	5.47923	loop_728	520000	4.79167	11	-0.124497	0.192568	0.317065	0.874505	FALSE	FALSE	FALSE	3	7	8	6	3	2	3	5	8	4	3	2	2	4	5	7	6	7	4	4	2	11	7	2
chr1	70680000	70690000	10001	*	chr1	71040000	71050000	10001	*	TRUE	TRUE	TRUE	TRUE	4.2147	loop_729	370000	6.375	14	-0.31747	0.277024	0.594494	0.548009	FALSE	FALSE	FALSE	9	13	3	7	4	5	5	3	9	6	6	5	9	2	4	2	6	7	8	4	11	1	10	14
chr1	71090000	71100000	10001	*	chr1	71520000	71530000	10001	*	TRUE	FALSE	TRUE	TRUE	3.89692	loop_730	440000	6.125	14	-0.787842	0.301514	1.08936	0.0982394	FALSE	FALSE	FALSE	7	10	14	5	2	5	3	6	6	3	7	4	5	3	1	3	7	10	6	4	8	9	9	10
chr1	71090000	71100000	10001	*	chr1	72030000	72040000	10001	*	TRUE	FALSE	FALSE	TRUE	4.93005	loop_731	950000	2.16667	7	-0.819118	-1.73469	-0.91557	0.205448	FALSE	FALSE	FALSE	4	2	7	7	2	2	2	1	4	1	1	4	0	2	4	0	0	0	0	0	0	4	2	3
chr1	71090000	71100000	10001	*	chr1	72630000	72640000	10001	*	FALSE	FALSE	FALSE	TRUE	2.9833	loop_732	1550000	1.29167	4	-0.055017	1.23892	1.29394	0.421668	FALSE	FALSE	FALSE	0	3	1	1	1	0	0	1	0	0	2	4	0	0	1	1	3	1	0	4	1	2	2	3
chr1	71130000	71140000	10001	*	chr1	72810000	72820000	10001	*	FALSE	TRUE	FALSE	FALSE	4.1439	loop_733	1690000	0.625	2	2.45672	0.291532	-2.16518	0.126926	FALSE	FALSE	FALSE	0	0	0	0	0	1	0	0	2	2	1	2	2	2	0	1	0	0	0	1	0	0	0	1
chr1	71140000	71150000	10001	*	chr1	73080000	73090000	10001	*	FALSE	TRUE	FALSE	FALSE	3.21381	loop_734	1950000	0.541667	3	0.851972	-1.02399	-1.87597	0.476226	FALSE	FALSE	FALSE	0	0	2	1	0	1	0	0	1	1	3	0	1	0	1	1	0	0	0	0	0	1	0	0
chr1	71190000	71200000	10001	*	chr1	71520000	71530000	10001	*	TRUE	TRUE	TRUE	TRUE	5.26328	loop_735	340000	11.5833	29	-1.20872	-0.357967	0.850752	0.0065056	TRUE	FALSE	TRUE	18	22	29	26	11	11	9	1	7	6	9	9	7	8	2	8	15	5	11	11	12	14	15	12
chr1	71190000	71200000	10001	*	chr1	72040000	72050000	10001	*	TRUE	TRUE	TRUE	TRUE	3.7344	loop_736	860000	2.33333	9	0.0892926	-0.516139	-0.605432	0.825819	FALSE	FALSE	FALSE	7	1	6	1	1	1	1	1	4	5	3	6	1	2	0	2	1	2	0	0	0	0	2	9
chr1	71580000	71590000	10001	*	chr1	72600000	72610000	10001	*	TRUE	FALSE	FALSE	FALSE	3.3025	loop_737	1030000	1.04167	4	-1.05273	-2.53433	-1.4816	0.146642	FALSE	FALSE	FALSE	2	4	2	3	2	1	0	1	1	3	0	0	2	1	1	0	0	0	1	0	1	0	0	0
chr1	71590000	71600000	10001	*	chr1	72030000	72040000	10001	*	TRUE	TRUE	FALSE	TRUE	3.95614	loop_738	450000	3.29167	11	-1.45747	-1.69514	-0.237671	0.0145797	TRUE	TRUE	FALSE	8	11	9	7	2	3	1	6	1	4	0	5	2	2	2	2	0	1	2	3	3	1	2	2
chr1	71760000	71770000	10001	*	chr1	72310000	72320000	10001	*	FALSE	FALSE	TRUE	FALSE	3.67	loop_739	560000	1.08333	6	-0.435035	2.21436	2.64939	0.048918	FALSE	FALSE	FALSE	2	1	0	0	0	1	0	0	2	0	0	0	1	0	0	0	1	1	2	2	2	2	6	3
chr1	71800000	71810000	10001	*	chr1	72180000	72190000	10001	*	FALSE	FALSE	TRUE	FALSE	8.75731	loop_740	390000	4.04167	16	-0.667933	3.83204	4.49998	8.37763e-18	TRUE	TRUE	TRUE	0	0	1	1	1	0	1	2	2	0	0	0	0	0	1	1	10	9	8	12	16	10	11	11
chr1	72130000	72140000	10001	*	chr1	72170000	72180000	10001	*	FALSE	FALSE	TRUE	FALSE	2.70619	loop_741	50000	4.83333	13	-0.424858	-0.234463	0.190396	0.771322	FALSE	FALSE	FALSE	11	6	13	6	2	2	4	1	5	6	6	7	3	3	3	2	2	3	2	5	5	5	6	8
chr1	72180000	72190000	10001	*	chr1	72280000	72290000	10001	*	FALSE	TRUE	FALSE	FALSE	3.70738	loop_742	110000	6.20833	15	0.156751	-0.943107	-1.09986	0.110006	FALSE	FALSE	FALSE	9	9	9	7	3	5	1	11	15	14	7	7	8	4	6	4	0	3	4	1	6	3	3	10
chr1	72180000	72190000	10001	*	chr1	72610000	72620000	10001	*	TRUE	TRUE	FALSE	TRUE	3.09396	loop_743	440000	3.33333	10	-0.397551	-0.929985	-0.532433	0.559716	FALSE	FALSE	FALSE	10	9	9	2	2	0	2	1	9	3	2	7	0	0	5	2	1	0	1	1	4	1	5	4
chr1	72180000	72190000	10001	*	chr1	72840000	72850000	10001	*	FALSE	TRUE	FALSE	TRUE	2.88785	loop_744	670000	2.16667	6	-0.0596096	-1.26479	-1.20518	0.370595	FALSE	FALSE	FALSE	5	1	2	6	1	3	3	0	5	5	2	4	0	0	3	3	1	0	1	0	1	2	3	1
chr1	72180000	72190000	10001	*	chr1	73100000	73110000	10001	*	TRUE	FALSE	FALSE	FALSE	3.06342	loop_745	930000	1.5	4	-1.59196	-1.15854	0.433415	0.261612	FALSE	FALSE	FALSE	1	2	3	4	3	3	2	1	2	0	1	2	0	0	0	2	1	0	0	1	1	2	4	1
chr1	72280000	72290000	10001	*	chr1	72580000	72590000	10001	*	TRUE	FALSE	FALSE	FALSE	2.63108	loop_746	310000	2.75	11	-0.975798	-1.07777	-0.101967	0.271848	FALSE	FALSE	FALSE	2	11	6	4	3	3	2	2	1	2	2	2	3	2	4	1	2	2	1	2	2	5	2	0
chr1	72290000	72300000	10001	*	chr1	72340000	72350000	10001	*	TRUE	FALSE	FALSE	FALSE	3.80558	loop_747	60000	11.25	20	-0.0714793	-0.144235	-0.0727552	0.934037	FALSE	FALSE	FALSE	20	14	15	18	9	8	5	4	15	19	17	14	6	8	6	10	7	8	8	10	9	16	10	14
chr1	72610000	72620000	10001	*	chr1	73680000	73690000	10001	*	FALSE	FALSE	TRUE	TRUE	2.79621	loop_748	1080000	0.875	3	-2.01212	-0.269285	1.74284	0.285568	FALSE	FALSE	FALSE	2	2	1	1	1	1	2	0	1	0	0	0	1	0	0	0	0	3	0	1	3	1	1	0
chr1	72620000	72630000	10001	*	chr1	73090000	73100000	10001	*	TRUE	FALSE	FALSE	TRUE	2.80115	loop_749	480000	2.20833	11	-1.43631	-1.48173	-0.0454203	0.12419	FALSE	FALSE	FALSE	11	5	1	6	3	2	0	3	3	2	2	2	0	0	2	1	2	0	2	1	2	1	2	0
chr1	73420000	73430000	10001	*	chr1	73680000	73690000	10001	*	FALSE	FALSE	TRUE	FALSE	2.4845	loop_750	270000	2.58333	8	-1.20077	0.879132	2.07991	0.0372586	FALSE	FALSE	FALSE	6	2	5	4	0	0	1	2	3	2	1	1	0	0	1	1	2	2	4	5	3	4	5	8
chr1	73440000	73450000	10001	*	chr1	73650000	73660000	10001	*	FALSE	FALSE	FALSE	TRUE	2.0703	loop_751	220000	4.20833	11	-0.63413	0.265234	0.899365	0.442108	FALSE	FALSE	FALSE	0	11	7	11	2	1	2	3	8	1	3	6	0	3	3	0	3	3	5	3	5	9	5	7
chr1	73840000	73850000	10001	*	chr1	74000000	74010000	10001	*	TRUE	FALSE	TRUE	TRUE	3.30317	loop_752	170000	4.625	10	-0.248881	-0.0137133	0.235168	0.90164	FALSE	FALSE	FALSE	5	7	10	6	3	2	2	3	7	4	6	1	6	4	1	5	3	5	4	3	10	6	6	2
chr1	73840000	73850000	10001	*	chr1	74460000	74470000	10001	*	TRUE	FALSE	TRUE	TRUE	4.13886	loop_753	630000	3.125	7	-0.994404	-0.0576334	0.936771	0.360447	FALSE	FALSE	FALSE	6	7	4	4	5	0	2	2	1	3	5	4	1	1	1	1	1	2	5	6	5	1	5	3
chr1	73840000	73850000	10001	*	chr1	74690000	74700000	10001	*	TRUE	FALSE	TRUE	TRUE	4.35267	loop_754	860000	1.91667	6	-1.23273	0.426607	1.65933	0.237067	FALSE	FALSE	FALSE	3	1	4	4	1	3	1	0	1	1	3	1	1	1	0	0	4	1	1	6	1	2	4	2
chr1	74000000	74010000	10001	*	chr1	74690000	74700000	10001	*	TRUE	FALSE	TRUE	TRUE	3.19578	loop_755	700000	2.16667	5	-1.34784	0.493244	1.84109	0.121892	FALSE	FALSE	FALSE	2	4	2	2	1	1	5	1	1	0	2	2	0	0	2	1	4	1	3	4	5	3	3	3
chr1	74010000	74020000	10001	*	chr1	74470000	74480000	10001	*	FALSE	FALSE	FALSE	TRUE	2.37266	loop_756	470000	3.125	7	-0.762449	0.604357	1.36681	0.237213	FALSE	FALSE	FALSE	3	6	5	6	1	1	1	1	4	6	4	0	1	0	1	0	2	5	0	1	7	7	6	7
chr1	74280000	74290000	10001	*	chr1	74690000	74700000	10001	*	FALSE	FALSE	TRUE	FALSE	2.6008	loop_757	420000	2.41667	7	0.0542931	1.04121	0.986912	0.358632	FALSE	FALSE	FALSE	2	2	4	0	2	2	2	0	5	5	4	0	1	0	2	0	4	1	3	4	4	2	7	2
chr1	74500000	74510000	10001	*	chr1	74680000	74690000	10001	*	TRUE	FALSE	TRUE	TRUE	3.01636	loop_758	190000	5.91667	14	-0.816256	0.644494	1.46075	0.0142484	TRUE	TRUE	TRUE	7	9	8	8	1	7	4	1	6	6	3	2	1	3	2	4	4	6	6	10	10	8	14	12
chr1	74550000	74560000	10001	*	chr1	74680000	74690000	10001	*	FALSE	FALSE	FALSE	TRUE	2.35881	loop_759	140000	5.375	12	-0.954983	0.483447	1.43843	0.0229451	TRUE	FALSE	TRUE	6	11	6	6	5	3	5	2	4	4	6	4	2	1	2	2	10	6	6	7	12	9	5	5
chr1	74580000	74590000	10001	*	chr1	74680000	74690000	10001	*	FALSE	FALSE	TRUE	FALSE	2.046	loop_760	110000	5.375	13	0.0476191	1.16071	1.11309	0.0397629	FALSE	FALSE	FALSE	3	7	8	4	3	1	1	3	7	0	8	6	2	4	5	1	4	9	4	10	9	8	9	13
chr1	74770000	74780000	10001	*	chr1	75200000	75210000	10001	*	TRUE	TRUE	TRUE	TRUE	11.0901	loop_761	440000	12.5833	23	-0.614384	-0.162534	0.45185	0.212573	FALSE	FALSE	FALSE	22	23	20	20	12	8	6	7	8	16	13	16	9	8	4	8	12	12	7	14	13	13	16	15
chr1	75050000	75060000	10001	*	chr1	75200000	75210000	10001	*	TRUE	FALSE	TRUE	TRUE	3.37932	loop_762	160000	7	22	-1.22532	0.239931	1.46525	0.01026	TRUE	FALSE	TRUE	9	5	11	22	4	6	0	9	5	6	4	9	0	3	1	2	6	3	7	10	14	12	12	8
chr1	75230000	75240000	10001	*	chr1	75730000	75740000	10001	*	FALSE	FALSE	TRUE	FALSE	2.74092	loop_763	510000	3.25	10	-0.763423	0.373999	1.13742	0.312374	FALSE	FALSE	FALSE	5	9	2	3	1	3	1	2	2	4	1	0	4	0	3	2	4	2	3	2	5	10	8	2
chr1	75260000	75270000	10001	*	chr1	75380000	75390000	10001	*	TRUE	TRUE	TRUE	TRUE	2.85139	loop_764	130000	1.79167	4	-0.112102	0.0498215	0.161923	0.985502	FALSE	FALSE	FALSE	2	2	4	3	0	1	0	2	3	2	3	0	3	0	2	1	3	0	1	1	3	3	1	3
chr1	75260000	75270000	10001	*	chr1	75630000	75640000	10001	*	TRUE	TRUE	TRUE	TRUE	3.89492	loop_765	380000	6.20833	15	-0.719607	-0.378149	0.341459	0.388802	FALSE	FALSE	FALSE	11	9	15	9	5	5	2	6	8	8	7	6	1	6	2	3	5	5	0	11	6	7	7	5
chr1	75720000	75730000	10001	*	chr1	75780000	75790000	10001	*	TRUE	FALSE	FALSE	TRUE	2.51319	loop_766	70000	9	29	-0.228187	-0.081238	0.146949	0.89294	FALSE	FALSE	FALSE	8	15	12	14	4	8	4	9	29	8	9	2	6	4	4	9	9	7	8	5	11	7	11	13
chr1	75890000	75900000	10001	*	chr1	76910000	76920000	10001	*	FALSE	FALSE	FALSE	TRUE	3.58323	loop_767	1030000	0.625	3	0.0301068	0.791407	0.761301	0.838507	FALSE	FALSE	FALSE	0	3	1	0	0	0	0	0	2	3	0	0	0	0	0	0	0	0	0	1	3	0	2	0
chr1	75900000	75910000	10001	*	chr1	75980000	75990000	10001	*	FALSE	TRUE	FALSE	FALSE	2.35447	loop_768	90000	6.54167	11	0.45981	0.143298	-0.316512	0.635682	FALSE	FALSE	FALSE	6	4	11	4	4	5	5	4	11	8	8	11	7	6	4	9	5	7	5	5	9	7	3	9
chr1	75900000	75910000	10001	*	chr1	76150000	76160000	10001	*	TRUE	TRUE	TRUE	TRUE	3.41176	loop_769	260000	7.375	14	0.267093	0.297068	0.0299751	0.799207	FALSE	FALSE	FALSE	10	7	11	9	1	6	3	4	14	8	9	9	10	6	4	5	4	6	9	9	10	9	8	6
chr1	75900000	75910000	10001	*	chr1	76300000	76310000	10001	*	FALSE	TRUE	TRUE	TRUE	2.76231	loop_770	410000	2.70833	6	0.000543043	0.389714	0.389171	0.851967	FALSE	FALSE	FALSE	5	4	3	5	2	0	1	0	2	5	2	1	3	0	3	4	2	4	2	3	4	6	3	1
chr1	75910000	75920000	10001	*	chr1	77140000	77150000	10001	*	TRUE	TRUE	TRUE	TRUE	4.09303	loop_771	1240000	1.95833	6	-0.301477	-0.32227	-0.0207935	0.92651	FALSE	FALSE	FALSE	3	3	6	3	1	0	1	1	3	4	2	4	0	1	0	2	1	0	1	2	2	3	1	3
chr1	75970000	75980000	10001	*	chr1	77530000	77540000	10001	*	FALSE	FALSE	FALSE	TRUE	2.70357	loop_772	1570000	1.29167	4	-0.564878	-0.0260001	0.538878	0.861386	FALSE	FALSE	FALSE	0	1	3	1	1	2	0	3	1	2	1	2	0	0	2	0	0	3	1	1	0	4	1	2
chr1	75990000	76000000	10001	*	chr1	76130000	76140000	10001	*	TRUE	FALSE	FALSE	FALSE	2.91396	loop_773	150000	6.5	17	-0.314553	-0.633693	-0.31914	0.464416	FALSE	FALSE	FALSE	17	6	4	13	5	6	4	7	15	7	8	8	4	3	6	3	7	3	3	3	6	6	5	7
chr1	75990000	76000000	10001	*	chr1	77120000	77130000	10001	*	FALSE	FALSE	FALSE	TRUE	3.27995	loop_774	1140000	2.375	8	0.70521	0.735179	0.0299689	0.68006	FALSE	FALSE	FALSE	6	2	1	3	0	0	0	1	2	4	5	2	2	1	2	3	2	0	1	1	8	3	5	3
chr1	76150000	76160000	10001	*	chr1	76320000	76330000	10001	*	TRUE	FALSE	FALSE	FALSE	3.38868	loop_775	180000	4.83333	13	-0.891762	-0.260858	0.630904	0.298562	FALSE	FALSE	FALSE	9	7	7	13	1	4	2	6	4	6	4	5	2	4	2	1	6	3	4	3	9	5	5	4
chr1	76150000	76160000	10001	*	chr1	77140000	77150000	10001	*	TRUE	TRUE	TRUE	TRUE	5.23068	loop_776	1000000	5	10	-0.553316	0.388123	0.941439	0.257518	FALSE	FALSE	FALSE	6	8	6	8	3	2	3	4	5	5	7	4	1	2	5	1	4	5	7	8	10	8	6	2
chr1	76320000	76330000	10001	*	chr1	77120000	77130000	10001	*	TRUE	TRUE	TRUE	TRUE	5.20433	loop_777	810000	4.79167	10	-0.444156	0.371286	0.815442	0.394876	FALSE	FALSE	FALSE	5	6	10	8	1	3	3	2	3	4	7	2	6	3	3	1	6	2	5	7	7	7	4	10
chr1	76330000	76340000	10001	*	chr1	76880000	76890000	10001	*	TRUE	FALSE	TRUE	TRUE	2.65399	loop_778	560000	4.29167	10	-0.428424	0.293413	0.721836	0.543785	FALSE	FALSE	FALSE	7	5	7	6	2	2	2	3	7	2	4	3	4	2	4	1	0	8	5	2	10	2	6	9
chr1	76570000	76580000	10001	*	chr1	77130000	77140000	10001	*	FALSE	FALSE	TRUE	TRUE	2.72246	loop_779	570000	2.08333	7	-0.823348	0.736115	1.55946	0.268602	FALSE	FALSE	FALSE	2	3	3	5	0	1	1	1	3	1	4	0	0	0	1	1	7	1	0	6	5	2	2	1
chr1	76900000	76910000	10001	*	chr1	77120000	77130000	10001	*	TRUE	TRUE	TRUE	TRUE	5.52911	loop_780	230000	9.58333	19	0.213346	0.105795	-0.107552	0.888513	FALSE	FALSE	FALSE	9	6	19	17	3	6	5	4	16	14	15	14	13	2	7	5	7	4	5	6	18	14	10	11
chr1	76910000	76920000	10001	*	chr1	77020000	77030000	10001	*	FALSE	FALSE	TRUE	FALSE	2.81133	loop_781	120000	3.95833	8	-0.0316623	0.609008	0.64067	0.524257	FALSE	FALSE	FALSE	7	5	3	4	2	0	2	4	7	4	5	6	3	2	1	1	4	6	5	2	5	8	3	6
chr1	77140000	77150000	10001	*	chr1	77670000	77680000	10001	*	FALSE	TRUE	TRUE	TRUE	5.25131	loop_782	540000	2.45833	7	0.670696	0.913248	0.242552	0.595988	FALSE	FALSE	FALSE	6	1	0	3	1	1	1	0	6	4	5	1	2	2	0	2	4	0	3	0	4	7	3	3
chr1	77150000	77160000	10001	*	chr1	77410000	77420000	10001	*	TRUE	FALSE	FALSE	TRUE	3.46585	loop_783	270000	4.95833	10	-0.823706	0.084951	0.908657	0.258956	FALSE	FALSE	FALSE	10	10	10	7	4	1	2	2	2	6	6	3	2	3	2	3	5	2	5	6	7	9	3	9
chr1	77150000	77160000	10001	*	chr1	77530000	77540000	10001	*	TRUE	TRUE	TRUE	TRUE	6.10342	loop_784	390000	6.66667	13	0.0491035	-0.312188	-0.361291	0.751182	FALSE	FALSE	FALSE	11	5	11	6	6	4	4	7	13	7	9	12	4	4	8	4	6	2	4	6	4	5	11	7
chr1	77150000	77160000	10001	*	chr1	77320000	77330000	10001	*	FALSE	FALSE	FALSE	TRUE	2.92538	loop_785	180000	5.41667	11	0.0968199	0.230146	0.133326	0.920571	FALSE	FALSE	FALSE	8	6	6	2	1	6	4	5	6	8	7	11	3	3	3	4	5	0	5	7	10	8	5	7
chr1	77160000	77170000	10001	*	chr1	77900000	77910000	10001	*	FALSE	FALSE	TRUE	TRUE	3.75902	loop_786	750000	1.625	6	0.326207	1.99062	1.66441	0.0776986	FALSE	FALSE	FALSE	0	1	1	2	0	0	0	2	0	2	2	1	0	1	1	1	2	1	1	3	3	6	6	3
chr1	77160000	77170000	10001	*	chr1	78100000	78110000	10001	*	FALSE	FALSE	TRUE	TRUE	3.48563	loop_787	950000	0.916667	5	1.93367	2.25822	0.324551	0.291672	FALSE	FALSE	FALSE	0	0	0	0	0	0	1	0	3	4	1	0	0	0	0	1	1	0	1	0	5	3	0	2
chr1	77210000	77220000	10001	*	chr1	77530000	77540000	10001	*	FALSE	FALSE	FALSE	TRUE	2.3411	loop_788	330000	4.54167	10	-0.190433	-0.0455857	0.144847	0.949154	FALSE	FALSE	FALSE	6	10	4	7	4	2	2	3	7	3	7	6	2	5	2	3	2	7	5	1	7	5	2	7
chr1	77570000	77580000	10001	*	chr1	77680000	77690000	10001	*	FALSE	TRUE	FALSE	FALSE	2.27376	loop_789	120000	5.16667	10	0.267443	-0.0563406	-0.323783	0.822324	FALSE	FALSE	FALSE	5	8	4	7	4	6	2	2	9	4	10	8	4	5	4	5	5	4	5	3	8	5	4	3
chr1	77730000	77740000	10001	*	chr1	78110000	78120000	10001	*	FALSE	FALSE	FALSE	TRUE	3.28337	loop_790	390000	2.41667	6	-0.153941	0.313405	0.467346	0.846548	FALSE	FALSE	FALSE	5	2	3	2	2	2	2	0	3	6	1	4	1	0	2	1	3	3	1	2	4	5	2	2
chr1	77740000	77750000	10001	*	chr1	77890000	77900000	10001	*	TRUE	TRUE	FALSE	TRUE	3.03696	loop_791	160000	4.91667	10	-0.457439	-0.541535	-0.0840964	0.619992	FALSE	FALSE	FALSE	8	6	9	9	7	3	2	3	7	10	5	4	1	8	1	2	1	3	6	1	5	4	6	7
chr1	77820000	77830000	10001	*	chr1	77890000	77900000	10001	*	TRUE	TRUE	FALSE	TRUE	2.71347	loop_792	80000	8.04167	17	0.0756957	-0.653707	-0.729403	0.235969	FALSE	FALSE	FALSE	10	12	15	11	4	8	5	5	16	14	17	8	7	7	6	5	5	4	4	7	4	10	4	5
chr1	77940000	77950000	10001	*	chr1	78110000	78120000	10001	*	FALSE	FALSE	TRUE	FALSE	4.05129	loop_793	180000	6.83333	15	0.0352039	0.294849	0.259645	0.812059	FALSE	FALSE	FALSE	8	4	9	10	4	5	5	3	6	8	11	10	7	4	4	3	8	3	5	4	15	10	4	14
chr1	78010000	78020000	10001	*	chr1	78110000	78120000	10001	*	TRUE	TRUE	TRUE	TRUE	5.27392	loop_794	110000	8.79167	19	-0.296252	-0.586997	-0.290745	0.45169	FALSE	FALSE	FALSE	19	13	14	16	5	3	4	10	13	19	6	10	8	5	4	7	2	2	6	8	6	9	12	10
chr1	78130000	78140000	10001	*	chr1	78600000	78610000	10001	*	TRUE	TRUE	TRUE	TRUE	11.0118	loop_795	480000	17.7083	30	0.0940817	0.229124	0.135042	0.772238	FALSE	FALSE	FALSE	21	25	27	24	10	4	12	8	30	17	30	22	11	13	14	12	24	16	13	17	19	21	20	15
chr1	78130000	78140000	10001	*	chr1	78670000	78680000	10001	*	TRUE	TRUE	TRUE	TRUE	5.76114	loop_796	550000	8.20833	15	-0.107255	-0.030458	0.0767973	0.970114	FALSE	FALSE	FALSE	15	13	12	9	5	5	3	4	6	10	10	9	7	10	6	6	7	6	4	5	13	10	9	13
chr1	78140000	78150000	10001	*	chr1	78280000	78290000	10001	*	TRUE	TRUE	FALSE	FALSE	2.7962	loop_797	150000	6.54167	15	0.388582	-0.118281	-0.506864	0.580118	FALSE	FALSE	FALSE	7	4	6	7	4	4	12	2	8	15	11	10	5	4	7	6	2	8	3	4	10	5	9	4
chr1	78140000	78150000	10001	*	chr1	78330000	78340000	10001	*	TRUE	FALSE	TRUE	TRUE	3.7749	loop_798	200000	8.125	20	-0.675441	-0.541176	0.134265	0.277846	FALSE	FALSE	FALSE	10	20	9	16	9	5	6	7	9	12	11	13	4	5	3	0	2	4	8	6	6	7	7	16
chr1	78140000	78150000	10001	*	chr1	78430000	78440000	10001	*	FALSE	FALSE	TRUE	FALSE	3.09076	loop_799	300000	5.75	16	-0.807216	0.720474	1.52769	0.00991825	TRUE	TRUE	TRUE	8	8	5	11	0	2	3	6	4	5	4	4	2	2	3	2	11	5	6	6	16	9	9	7
chr1	78140000	78150000	10001	*	chr1	78480000	78490000	10001	*	TRUE	FALSE	FALSE	TRUE	4.36637	loop_800	350000	5.45833	10	-0.140802	0.0153244	0.156127	0.951779	FALSE	FALSE	FALSE	6	7	7	8	2	5	5	3	7	5	7	8	2	5	6	2	2	2	5	6	10	4	7	10
chr1	78150000	78160000	10001	*	chr1	78220000	78230000	10001	*	FALSE	TRUE	FALSE	FALSE	2.59936	loop_801	80000	8.54167	16	-0.0451824	0.0136574	0.0588398	0.989829	FALSE	FALSE	FALSE	12	8	9	13	4	5	8	7	11	15	6	5	7	6	8	10	6	8	6	6	12	8	16	9
chr1	78340000	78350000	10001	*	chr1	78600000	78610000	10001	*	TRUE	FALSE	FALSE	TRUE	3.06059	loop_802	270000	4.70833	11	-0.427153	-0.476101	-0.0489484	0.661412	FALSE	FALSE	FALSE	5	7	7	8	2	6	3	6	5	6	6	6	2	4	3	3	3	1	2	3	5	11	5	4
chr1	78370000	78380000	10001	*	chr1	78470000	78480000	10001	*	FALSE	TRUE	FALSE	FALSE	2.36898	loop_803	110000	6.66667	18	0.417413	-0.96416	-1.38157	0.0252882	FALSE	FALSE	FALSE	7	3	10	11	7	3	8	5	18	16	10	4	10	3	8	8	2	2	2	6	2	3	7	5
chr1	78370000	78380000	10001	*	chr1	78600000	78610000	10001	*	FALSE	TRUE	FALSE	FALSE	2.76036	loop_804	240000	5.58333	13	0.611751	0.444155	-0.167596	0.552607	FALSE	FALSE	FALSE	6	7	5	8	1	4	2	1	13	7	11	10	6	4	1	4	2	2	7	5	10	10	5	3
chr1	78480000	78490000	10001	*	chr1	78600000	78610000	10001	*	FALSE	FALSE	FALSE	TRUE	2.62717	loop_805	130000	5.66667	12	-0.484342	-0.0638005	0.420542	0.65569	FALSE	FALSE	FALSE	8	12	2	7	8	1	4	7	12	7	6	8	1	1	2	3	4	5	4	6	10	6	5	7
chr1	78610000	78620000	10001	*	chr1	78670000	78680000	10001	*	TRUE	TRUE	TRUE	TRUE	4.4695	loop_806	70000	16.2917	26	-0.114072	-0.145603	-0.0315315	0.893999	FALSE	FALSE	FALSE	25	21	22	20	10	9	11	17	21	16	26	23	15	17	9	7	14	15	11	17	16	11	15	23
chr1	78690000	78700000	10001	*	chr1	78830000	78840000	10001	*	TRUE	TRUE	FALSE	TRUE	3.18097	loop_807	150000	5.70833	18	0.271211	-1.01456	-1.28578	0.0507325	FALSE	FALSE	FALSE	9	7	5	11	4	8	1	4	10	18	4	10	7	6	4	5	1	4	3	3	2	3	3	5
chr1	78690000	78700000	10001	*	chr1	79190000	79200000	10001	*	TRUE	TRUE	FALSE	TRUE	3.48671	loop_808	510000	3.45833	8	-0.0589016	-0.349577	-0.290676	0.877901	FALSE	FALSE	FALSE	5	8	2	3	5	3	0	3	4	8	3	5	1	6	2	1	2	1	2	1	7	4	5	2
chr1	78690000	78700000	10001	*	chr1	79320000	79330000	10001	*	TRUE	FALSE	FALSE	FALSE	2.79184	loop_809	640000	1.5	5	-1.56514	-0.299476	1.26566	0.365904	FALSE	FALSE	FALSE	1	3	4	3	2	1	2	0	1	2	1	1	1	0	0	0	0	2	0	3	0	3	1	5
chr1	78840000	78850000	10001	*	chr1	79480000	79490000	10001	*	FALSE	FALSE	TRUE	TRUE	2.8365	loop_810	650000	1.45833	4	0.0742733	1.15236	1.07809	0.464477	FALSE	FALSE	FALSE	0	2	2	4	0	0	0	1	2	3	2	2	1	0	0	0	2	3	0	3	1	3	2	2
chr1	78840000	78850000	10001	*	chr1	79190000	79200000	10001	*	TRUE	TRUE	FALSE	TRUE	5.348	loop_811	360000	4.70833	11	0.15119	-1.33417	-1.48536	0.0345357	FALSE	FALSE	FALSE	6	8	5	11	1	2	6	5	7	10	7	6	9	2	4	6	1	1	2	2	2	4	4	2
chr1	78840000	78850000	10001	*	chr1	79350000	79360000	10001	*	TRUE	FALSE	TRUE	TRUE	4.28421	loop_812	520000	3.83333	9	-0.197094	0.478364	0.675458	0.563289	FALSE	FALSE	FALSE	4	3	9	4	3	2	2	1	6	6	2	1	1	4	3	3	6	4	5	4	8	4	4	3
chr1	79250000	79260000	10001	*	chr1	79350000	79360000	10001	*	TRUE	TRUE	TRUE	TRUE	4.80722	loop_813	110000	10.5833	25	-0.267908	-0.117074	0.150834	0.809882	FALSE	FALSE	FALSE	25	19	15	15	8	1	2	9	10	14	17	11	7	7	6	8	11	9	9	8	16	9	11	7
chr1	79260000	79270000	10001	*	chr1	79490000	79500000	10001	*	FALSE	TRUE	FALSE	TRUE	2.88034	loop_814	240000	3.04167	7	0.175408	-0.441677	-0.617085	0.707672	FALSE	FALSE	FALSE	4	3	1	3	1	5	4	3	5	5	2	7	5	2	2	2	4	2	2	1	3	1	3	3
chr1	79490000	79500000	10001	*	chr1	80200000	80210000	10001	*	TRUE	FALSE	TRUE	TRUE	5.18238	loop_815	720000	3.83333	9	-0.908391	-0.0249268	0.883464	0.318926	FALSE	FALSE	FALSE	9	5	7	4	4	2	4	1	5	3	3	4	2	1	2	1	6	4	1	4	6	3	2	9
chr1	79500000	79510000	10001	*	chr1	79960000	79970000	10001	*	FALSE	FALSE	TRUE	FALSE	2.43437	loop_816	470000	3.20833	8	-0.114706	1.10101	1.21572	0.158099	FALSE	FALSE	FALSE	2	3	4	5	1	2	1	1	2	2	8	4	4	0	0	0	5	3	6	4	7	7	5	1
chr1	80210000	80220000	10001	*	chr1	80650000	80660000	10001	*	FALSE	FALSE	FALSE	TRUE	2.17156	loop_817	450000	3.29167	8	-0.554769	-0.586682	-0.0319132	0.680993	FALSE	FALSE	FALSE	7	2	4	8	1	2	1	7	5	3	2	4	6	1	2	0	2	0	1	0	3	6	6	6
chr1	80220000	80230000	10001	*	chr1	81300000	81310000	10001	*	FALSE	TRUE	FALSE	TRUE	2.90393	loop_818	1090000	2.33333	8	-0.434673	-0.405728	0.028945	0.868906	FALSE	FALSE	FALSE	8	7	3	0	0	1	0	4	2	3	1	3	1	3	1	3	3	0	2	2	0	3	4	2
chr1	80220000	80230000	10001	*	chr1	80730000	80740000	10001	*	TRUE	FALSE	FALSE	TRUE	2.78687	loop_819	520000	2.45833	6	0.11084	-0.522739	-0.633579	0.761722	FALSE	FALSE	FALSE	2	3	6	4	1	2	0	3	4	4	3	4	0	5	1	3	6	1	0	2	2	1	1	1
chr1	80220000	80230000	10001	*	chr1	81770000	81780000	10001	*	FALSE	FALSE	TRUE	TRUE	3.74636	loop_820	1560000	1.75	6	0.417662	0.738535	0.320874	0.805485	FALSE	FALSE	FALSE	2	0	4	6	0	0	0	0	4	4	3	0	3	0	0	1	1	1	2	2	1	4	2	2
chr1	81550000	81560000	10001	*	chr1	81750000	81760000	10001	*	TRUE	TRUE	TRUE	TRUE	4.65207	loop_821	210000	9.375	20	0.366141	0.294952	-0.071189	0.707672	FALSE	FALSE	FALSE	11	8	19	9	7	2	4	3	18	20	6	10	7	7	10	7	6	4	6	12	16	9	12	12
chr1	81810000	81820000	10001	*	chr1	83860000	83870000	10001	*	TRUE	FALSE	FALSE	FALSE	5.27979	loop_822	2060000	1.04167	3	-1.96967	-1.33795	0.63172	0.234072	FALSE	FALSE	FALSE	3	1	3	3	1	2	0	2	1	0	1	1	0	1	0	0	1	0	1	0	1	1	1	1
chr1	82770000	82780000	10001	*	chr1	83850000	83860000	10001	*	FALSE	FALSE	FALSE	TRUE	4.18178	loop_823	1090000	2	5	-0.158556	0.132589	0.291145	0.953679	FALSE	FALSE	FALSE	2	0	4	5	3	2	0	0	2	1	2	2	1	0	4	3	3	2	3	1	1	4	2	1
chr1	82780000	82790000	10001	*	chr1	83520000	83530000	10001	*	FALSE	FALSE	FALSE	TRUE	2.31931	loop_824	750000	3.04167	7	-0.338225	0.407289	0.745514	0.598066	FALSE	FALSE	FALSE	4	2	6	4	1	2	0	4	5	4	4	2	2	1	1	1	3	2	5	2	4	4	7	3
chr1	83570000	83580000	10001	*	chr1	83810000	83820000	10001	*	TRUE	FALSE	FALSE	FALSE	2.6324	loop_825	250000	2.95833	10	-0.768549	-0.819138	-0.0505887	0.495954	FALSE	FALSE	FALSE	4	10	6	4	1	5	1	1	2	3	3	3	3	1	3	1	1	0	1	0	4	5	1	8
chr1	83920000	83930000	10001	*	chr1	84600000	84610000	10001	*	FALSE	TRUE	TRUE	TRUE	3.38695	loop_826	690000	2.5	5	0.689982	0.944169	0.254187	0.526721	FALSE	FALSE	FALSE	2	1	2	2	2	1	2	0	1	4	3	1	3	3	4	2	0	1	5	2	5	5	5	4
chr1	83920000	83930000	10001	*	chr1	84430000	84440000	10001	*	TRUE	TRUE	TRUE	TRUE	5.80837	loop_827	520000	6.41667	16	0.58065	-0.100058	-0.680708	0.343697	FALSE	FALSE	FALSE	6	6	11	8	1	3	1	7	16	6	4	12	6	10	7	7	6	2	3	2	9	7	6	8
chr1	83930000	83940000	10001	*	chr1	84760000	84770000	10001	*	TRUE	TRUE	TRUE	TRUE	3.87581	loop_828	840000	3.08333	10	0.0575118	0.22344	0.165928	0.952457	FALSE	FALSE	FALSE	4	5	2	5	0	3	2	1	2	3	6	3	2	3	2	3	2	1	2	2	3	4	4	10
chr1	83930000	83940000	10001	*	chr1	84120000	84130000	10001	*	TRUE	TRUE	TRUE	TRUE	10.5131	loop_829	200000	18.0417	33	0.0476037	0.216591	0.168988	0.782337	FALSE	FALSE	FALSE	24	33	26	30	5	9	4	7	31	29	23	25	9	13	8	11	10	15	13	16	17	27	23	25
chr1	83940000	83950000	10001	*	chr1	84060000	84070000	10001	*	TRUE	FALSE	FALSE	FALSE	2.74468	loop_830	130000	5.95833	12	-0.533472	0.183756	0.717227	0.410386	FALSE	FALSE	FALSE	9	11	12	6	1	4	3	4	7	1	6	7	5	3	4	3	7	3	4	5	5	12	12	9
chr1	84140000	84150000	10001	*	chr1	84930000	84940000	10001	*	FALSE	FALSE	TRUE	TRUE	3.50899	loop_831	800000	2.29167	7	0.746171	0.831965	0.0857944	0.613535	FALSE	FALSE	FALSE	2	2	4	0	0	1	2	1	0	5	7	1	1	2	3	3	2	2	1	3	3	4	2	4
chr1	84140000	84150000	10001	*	chr1	84430000	84440000	10001	*	TRUE	TRUE	TRUE	TRUE	8.94705	loop_832	300000	15.7917	27	-0.00281908	0.11764	0.120459	0.937082	FALSE	FALSE	FALSE	27	25	24	26	4	11	4	3	17	27	22	22	6	10	16	8	13	5	10	9	21	21	23	25
chr1	84140000	84150000	10001	*	chr1	84610000	84620000	10001	*	TRUE	FALSE	TRUE	TRUE	4.15246	loop_833	480000	4.375	10	-0.0483813	1.32379	1.37217	0.0136154	FALSE	TRUE	TRUE	1	2	7	4	2	4	0	3	2	4	4	6	3	2	2	1	6	7	6	5	8	6	10	10
chr1	84140000	84150000	10001	*	chr1	84750000	84760000	10001	*	TRUE	TRUE	TRUE	TRUE	4.35868	loop_834	620000	5.29167	11	0.0789237	0.0831979	0.00427413	0.987756	FALSE	FALSE	FALSE	7	10	6	11	2	1	2	2	10	10	6	5	7	0	2	5	3	3	3	5	7	1	10	9
chr1	84290000	84300000	10001	*	chr1	84430000	84440000	10001	*	FALSE	FALSE	FALSE	TRUE	2.56748	loop_835	150000	6.41667	20	0.218121	0.593796	0.375675	0.528301	FALSE	FALSE	FALSE	6	6	8	9	1	2	5	4	5	7	12	10	2	4	5	6	5	5	6	6	20	8	5	7
chr1	84440000	84450000	10001	*	chr1	84620000	84630000	10001	*	TRUE	TRUE	TRUE	TRUE	4.60896	loop_836	190000	5.66667	12	-0.496813	-1.13329	-0.636479	0.117175	FALSE	FALSE	FALSE	12	9	5	9	2	8	5	10	11	5	11	6	5	5	4	0	4	3	1	2	6	4	4	5
chr1	84440000	84450000	10001	*	chr1	84750000	84760000	10001	*	TRUE	TRUE	TRUE	TRUE	6.7995	loop_837	320000	8.25	16	-0.298257	-0.192168	0.106088	0.787085	FALSE	FALSE	FALSE	12	16	9	8	6	8	7	5	10	11	10	10	5	5	5	6	7	7	5	3	12	15	7	9
chr1	84440000	84450000	10001	*	chr1	84930000	84940000	10001	*	TRUE	TRUE	TRUE	TRUE	4.37217	loop_838	500000	3.54167	8	-0.0622826	-0.33406	-0.271778	0.878023	FALSE	FALSE	FALSE	4	5	8	3	3	2	2	3	7	3	7	3	2	3	3	3	1	3	5	2	2	3	6	2
chr1	84480000	84490000	10001	*	chr1	85260000	85270000	10001	*	FALSE	FALSE	FALSE	TRUE	3.15915	loop_839	790000	1.41667	5	0.622939	0.747895	0.124956	0.789447	FALSE	FALSE	FALSE	2	2	2	1	0	0	0	1	5	1	2	1	0	2	1	1	0	1	1	2	3	1	2	3
chr1	84500000	84510000	10001	*	chr1	84620000	84630000	10001	*	FALSE	FALSE	FALSE	TRUE	2.29639	loop_840	130000	7.29167	17	0.552472	-0.318855	-0.871327	0.162038	FALSE	FALSE	FALSE	10	9	7	6	4	8	2	5	12	17	13	17	6	7	4	6	1	5	4	3	11	3	6	9
chr1	84620000	84630000	10001	*	chr1	84750000	84760000	10001	*	FALSE	TRUE	TRUE	TRUE	3.99386	loop_841	140000	9.5	21	0.34702	0.496504	0.149485	0.510858	FALSE	FALSE	FALSE	5	9	7	11	10	7	6	3	15	17	9	14	8	7	6	5	7	9	8	4	8	21	15	17
chr1	84620000	84630000	10001	*	chr1	84930000	84940000	10001	*	TRUE	TRUE	TRUE	TRUE	3.4467	loop_842	320000	5.29167	12	0.200762	0.30783	0.107068	0.871382	FALSE	FALSE	FALSE	7	6	4	8	2	5	3	1	8	6	6	10	4	3	8	0	4	5	7	1	12	6	8	3
chr1	84770000	84780000	10001	*	chr1	84930000	84940000	10001	*	TRUE	TRUE	TRUE	TRUE	4.7044	loop_843	170000	14.5417	28	-0.169743	-0.524846	-0.355103	0.299392	FALSE	FALSE	FALSE	19	28	21	20	7	12	12	12	23	26	15	15	14	13	9	10	8	7	6	14	19	9	14	16
chr1	84820000	84830000	10001	*	chr1	84930000	84940000	10001	*	FALSE	FALSE	TRUE	FALSE	2.1965	loop_844	120000	8.41667	15	-0.15896	0.201685	0.360645	0.736977	FALSE	FALSE	FALSE	15	13	7	7	9	4	4	6	10	15	10	11	5	2	6	5	5	9	8	14	13	4	9	11
chr1	84940000	84950000	10001	*	chr1	85090000	85100000	10001	*	FALSE	FALSE	FALSE	TRUE	2.79833	loop_845	160000	5.95833	11	0.108244	0.194233	0.0859886	0.936969	FALSE	FALSE	FALSE	3	8	10	5	1	4	5	7	8	8	7	11	7	4	3	2	4	5	4	7	8	10	7	5
chr1	84940000	84950000	10001	*	chr1	85250000	85260000	10001	*	TRUE	TRUE	TRUE	TRUE	8.36105	loop_846	320000	11.875	21	0.00353934	0.257979	0.25444	0.737708	FALSE	FALSE	FALSE	11	18	13	16	9	5	6	9	18	15	21	16	2	8	10	6	10	10	12	11	19	16	12	12
chr1	85110000	85120000	10001	*	chr1	85250000	85260000	10001	*	TRUE	TRUE	TRUE	TRUE	6.59004	loop_847	150000	13.3333	25	0.00686298	0.540798	0.533935	0.168317	FALSE	FALSE	FALSE	14	15	15	18	7	6	5	10	18	16	14	16	10	7	10	6	13	12	10	14	21	23	15	25
chr1	85300000	85310000	10001	*	chr1	85390000	85400000	10001	*	TRUE	TRUE	FALSE	TRUE	4.64755	loop_848	100000	10.8333	24	-0.0956649	-1.18124	-1.08557	0.00390007	FALSE	TRUE	TRUE	24	23	16	19	6	9	5	6	19	16	14	15	11	17	7	6	4	4	1	7	11	8	5	7
chr1	85300000	85310000	10001	*	chr1	85500000	85510000	10001	*	TRUE	TRUE	TRUE	TRUE	4.09438	loop_849	210000	8.58333	17	-0.201539	0.0281014	0.22964	0.858703	FALSE	FALSE	FALSE	11	7	14	7	7	10	4	8	10	17	10	7	7	5	4	5	8	5	5	11	12	6	10	16
chr1	85300000	85310000	10001	*	chr1	85690000	85700000	10001	*	TRUE	TRUE	TRUE	TRUE	7.64634	loop_850	400000	9.83333	20	0.22209	0.242846	0.0207558	0.826697	FALSE	FALSE	FALSE	14	7	8	14	3	6	6	9	20	14	9	15	8	8	10	1	6	6	8	5	16	16	9	18
chr1	85300000	85310000	10001	*	chr1	85880000	85890000	10001	*	FALSE	TRUE	FALSE	FALSE	4.15926	loop_851	590000	2.83333	9	1.41547	0.52989	-0.885575	0.209305	FALSE	FALSE	FALSE	1	2	4	7	0	0	0	0	9	5	1	6	6	3	3	3	2	2	0	3	3	2	5	1
chr1	85310000	85320000	10001	*	chr1	85580000	85590000	10001	*	TRUE	TRUE	TRUE	TRUE	5.16452	loop_852	280000	6.875	13	0.199594	0.229564	0.0299705	0.883099	FALSE	FALSE	FALSE	8	5	12	10	2	6	3	2	13	8	8	7	6	4	8	5	8	5	4	3	12	7	10	9
chr1	85310000	85320000	10001	*	chr1	85840000	85850000	10001	*	FALSE	FALSE	FALSE	TRUE	3.38552	loop_853	540000	2.95833	7	0.0801958	-0.032463	-0.112659	0.98832	FALSE	FALSE	FALSE	2	4	1	7	1	2	2	3	4	5	3	2	7	0	3	1	3	1	3	1	6	1	2	7
chr1	85330000	85340000	10001	*	chr1	85460000	85470000	10001	*	FALSE	FALSE	TRUE	FALSE	2.65754	loop_854	140000	5.70833	15	0.205831	0.932506	0.726674	0.166937	FALSE	FALSE	FALSE	9	4	5	6	2	3	2	1	4	6	4	4	7	7	5	2	3	7	7	4	15	11	7	12
chr1	85400000	85410000	10001	*	chr1	85690000	85700000	10001	*	FALSE	TRUE	FALSE	FALSE	3.1641	loop_855	300000	4.16667	12	0.292671	-0.759924	-1.05259	0.296651	FALSE	FALSE	FALSE	12	4	2	9	2	3	2	1	7	8	7	11	3	1	5	3	1	1	0	2	5	3	5	3
chr1	85490000	85500000	10001	*	chr1	85580000	85590000	10001	*	TRUE	TRUE	FALSE	TRUE	3.34815	loop_856	100000	8.83333	20	-0.292731	-0.955957	-0.663226	0.0731195	FALSE	FALSE	FALSE	14	14	11	13	11	8	10	6	13	20	10	13	7	7	4	5	5	5	5	4	5	7	5	10
chr1	85490000	85500000	10001	*	chr1	85680000	85690000	10001	*	TRUE	FALSE	TRUE	TRUE	3.62968	loop_857	200000	5.16667	11	-0.757324	-0.908872	-0.151548	0.19206	FALSE	FALSE	FALSE	8	10	11	10	3	6	4	5	6	8	4	6	6	2	3	1	1	5	3	1	1	6	7	7
chr1	85590000	85600000	10001	*	chr1	85680000	85690000	10001	*	FALSE	TRUE	FALSE	TRUE	3.66924	loop_858	100000	7.375	16	0.160776	-0.185005	-0.345782	0.787055	FALSE	FALSE	FALSE	6	9	11	10	3	7	5	6	6	16	10	6	7	6	11	6	11	3	2	7	12	7	5	5
chr1	85700000	85710000	10001	*	chr1	85850000	85860000	10001	*	FALSE	TRUE	FALSE	FALSE	2.68454	loop_859	160000	4.91667	16	0.515969	-0.07877	-0.594739	0.552119	FALSE	FALSE	FALSE	2	5	7	10	2	4	2	2	16	9	5	9	4	2	1	7	2	3	4	2	4	7	5	4
chr1	85700000	85710000	10001	*	chr1	85880000	85890000	10001	*	TRUE	TRUE	FALSE	TRUE	3.21255	loop_860	190000	6.58333	14	-0.0703319	-0.685164	-0.614832	0.386865	FALSE	FALSE	FALSE	5	14	11	10	9	6	3	1	9	6	8	13	5	3	8	8	4	2	3	3	8	6	9	4
chr1	85890000	85900000	10001	*	chr1	86010000	86020000	10001	*	FALSE	FALSE	FALSE	TRUE	2.8464	loop_861	130000	6.41667	14	-0.684512	0.0370866	0.721599	0.309532	FALSE	FALSE	FALSE	12	9	9	7	2	5	3	9	6	8	3	10	4	1	2	4	3	4	7	4	14	7	9	12
chr1	86380000	86390000	10001	*	chr1	86500000	86510000	10001	*	TRUE	TRUE	TRUE	TRUE	4.30931	loop_862	130000	10.5833	23	-0.0597701	-0.267516	-0.207746	0.78816	FALSE	FALSE	FALSE	12	23	15	12	6	6	8	7	14	16	16	10	8	12	8	7	9	11	8	2	12	10	11	11
chr1	86380000	86390000	10001	*	chr1	86680000	86690000	10001	*	TRUE	TRUE	TRUE	TRUE	3.68744	loop_863	310000	2.29167	10	-0.569194	0.00659115	0.575785	0.785385	FALSE	FALSE	FALSE	1	10	3	4	1	0	0	2	2	0	3	3	2	1	2	1	2	1	1	3	6	2	2	3
chr1	86380000	86390000	10001	*	chr1	86730000	86740000	10001	*	FALSE	FALSE	TRUE	FALSE	3.89149	loop_864	360000	3.54167	11	0.352603	1.27199	0.919389	0.139789	FALSE	FALSE	FALSE	5	5	2	2	1	0	3	0	4	7	4	3	0	3	2	2	5	3	3	4	5	11	6	5
chr1	86410000	86420000	10001	*	chr1	86500000	86510000	10001	*	FALSE	FALSE	FALSE	TRUE	2.93084	loop_865	100000	10.75	20	0.136798	-0.319746	-0.456544	0.51104	FALSE	FALSE	FALSE	15	11	10	20	10	8	10	2	15	16	14	16	11	8	11	10	9	10	6	4	11	7	11	13
chr1	86500000	86510000	10001	*	chr1	87080000	87090000	10001	*	FALSE	FALSE	TRUE	TRUE	2.86085	loop_866	590000	2	6	-0.390408	1.07062	1.46103	0.331709	FALSE	FALSE	FALSE	1	3	5	2	0	1	0	1	4	0	2	5	0	0	0	0	1	1	4	0	2	4	6	6
chr1	86500000	86510000	10001	*	chr1	86680000	86690000	10001	*	TRUE	FALSE	TRUE	TRUE	4.22834	loop_867	190000	4.41667	9	-0.381369	0.561815	0.943184	0.293811	FALSE	FALSE	FALSE	3	7	5	6	5	2	2	2	1	5	2	4	3	6	1	4	4	5	9	4	9	6	3	8
chr1	86500000	86510000	10001	*	chr1	86740000	86750000	10001	*	FALSE	FALSE	FALSE	TRUE	3.24111	loop_868	250000	6.04167	12	0.239055	0.481225	0.24217	0.672289	FALSE	FALSE	FALSE	6	4	5	10	3	6	3	2	9	9	9	5	6	4	5	3	4	3	9	6	11	12	4	7
chr1	86780000	86790000	10001	*	chr1	86960000	86970000	10001	*	FALSE	TRUE	FALSE	TRUE	3.5501	loop_869	190000	7.375	18	0.0837776	-0.14271	-0.226488	0.898259	FALSE	FALSE	FALSE	13	7	10	9	7	4	3	5	18	8	18	9	1	6	6	3	7	7	3	6	5	8	6	8
chr1	86780000	86790000	10001	*	chr1	87080000	87090000	10001	*	FALSE	FALSE	FALSE	TRUE	4.58308	loop_870	310000	7.08333	14	-0.304266	-0.113862	0.190403	0.834345	FALSE	FALSE	FALSE	13	7	14	10	3	1	3	11	5	9	10	14	1	6	3	6	7	8	5	4	10	4	7	9
chr1	86830000	86840000	10001	*	chr1	86960000	86970000	10001	*	TRUE	TRUE	TRUE	TRUE	4.00597	loop_871	140000	13.5	21	0.0261847	0.0173273	-0.00885733	0.99739	FALSE	FALSE	FALSE	20	19	19	19	5	7	7	10	19	21	18	18	11	10	10	8	9	17	10	12	19	13	8	15
chr1	86830000	86840000	10001	*	chr1	87080000	87090000	10001	*	TRUE	TRUE	TRUE	TRUE	5.54017	loop_872	260000	10.7917	23	0.126853	-0.082952	-0.209805	0.871407	FALSE	FALSE	FALSE	15	17	11	18	5	4	6	6	18	12	11	19	9	10	8	8	10	5	4	3	23	11	10	16
chr1	87110000	87120000	10001	*	chr1	88300000	88310000	10001	*	FALSE	FALSE	TRUE	FALSE	2.96135	loop_873	1200000	1.33333	4	-0.452159	1.34257	1.79473	0.234097	FALSE	FALSE	FALSE	2	0	0	1	0	2	1	1	0	1	0	3	0	0	0	2	0	2	1	4	4	4	2	2
chr1	87130000	87140000	10001	*	chr1	87220000	87230000	10001	*	FALSE	TRUE	FALSE	FALSE	2.49628	loop_874	100000	8.29167	16	0.315058	-0.19479	-0.509848	0.514709	FALSE	FALSE	FALSE	10	10	5	11	8	3	9	4	16	9	13	12	10	7	13	2	4	6	6	2	9	10	10	10
chr1	87130000	87140000	10001	*	chr1	87280000	87290000	10001	*	TRUE	TRUE	TRUE	TRUE	4.23179	loop_875	160000	9.75	18	-0.258713	-0.0765698	0.182143	0.824471	FALSE	FALSE	FALSE	12	16	10	8	9	6	6	13	11	18	12	10	7	8	4	4	4	8	12	6	9	9	18	14
chr1	87130000	87140000	10001	*	chr1	87950000	87960000	10001	*	TRUE	FALSE	TRUE	TRUE	3.80053	loop_876	830000	3.95833	8	0.28274	0.0555279	-0.227212	0.903688	FALSE	FALSE	FALSE	4	6	6	5	0	2	2	4	8	8	2	3	7	1	3	5	6	4	5	1	2	4	2	5
chr1	87130000	87140000	10001	*	chr1	88060000	88070000	10001	*	TRUE	TRUE	FALSE	TRUE	3.14354	loop_877	940000	2.875	8	-0.135187	-0.390927	-0.25574	0.878249	FALSE	FALSE	FALSE	6	3	2	5	3	1	2	3	8	1	4	4	1	2	4	1	4	2	2	2	4	2	0	3
chr1	87160000	87170000	10001	*	chr1	87250000	87260000	10001	*	FALSE	FALSE	TRUE	FALSE	2.52631	loop_878	100000	8.70833	19	-0.0587732	0.33959	0.398363	0.623519	FALSE	FALSE	FALSE	12	8	14	11	4	1	5	9	13	6	19	10	3	4	6	6	6	9	11	6	13	9	8	16
chr1	87290000	87300000	10001	*	chr1	88590000	88600000	10001	*	FALSE	FALSE	TRUE	TRUE	3.48574	loop_879	1310000	1.625	5	1.01169	1.95886	0.947174	0.191532	FALSE	FALSE	FALSE	1	0	0	1	0	0	1	2	2	5	1	1	1	2	0	0	0	3	2	3	4	5	0	5
chr1	87310000	87320000	10001	*	chr1	88060000	88070000	10001	*	TRUE	TRUE	TRUE	TRUE	3.47493	loop_880	760000	4.83333	11	0.473053	0.490269	0.0172161	0.675158	FALSE	FALSE	FALSE	6	5	9	5	2	0	1	2	5	6	8	5	6	5	5	3	4	2	1	6	7	6	11	6
chr1	87320000	87330000	10001	*	chr1	87950000	87960000	10001	*	TRUE	TRUE	TRUE	TRUE	3.65229	loop_881	640000	6.20833	13	-0.156992	-0.266442	-0.10945	0.882144	FALSE	FALSE	FALSE	8	10	9	10	8	3	2	3	9	10	11	6	4	2	4	6	5	4	6	3	4	7	13	2
chr1	88170000	88180000	10001	*	chr1	88540000	88550000	10001	*	TRUE	TRUE	FALSE	TRUE	3.16624	loop_882	380000	4.16667	10	-0.282926	-0.0261945	0.256731	0.888328	FALSE	FALSE	FALSE	6	9	5	6	2	3	1	3	7	4	1	4	3	5	4	2	1	3	4	5	10	4	2	6
chr1	88180000	88190000	10001	*	chr1	88590000	88600000	10001	*	FALSE	FALSE	TRUE	TRUE	3.10585	loop_883	420000	4.91667	11	0.370166	0.51008	0.139913	0.697765	FALSE	FALSE	FALSE	4	3	7	6	3	2	1	4	5	11	5	3	6	3	4	4	7	2	1	4	9	4	9	11
chr1	88180000	88190000	10001	*	chr1	88870000	88880000	10001	*	FALSE	FALSE	FALSE	TRUE	3.37064	loop_884	700000	1.29167	4	-0.0991867	-0.755052	-0.655865	0.802405	FALSE	FALSE	FALSE	2	2	0	3	2	1	0	2	2	2	0	4	1	0	3	0	2	1	1	0	1	0	1	1
chr1	88650000	88660000	10001	*	chr1	88870000	88880000	10001	*	TRUE	TRUE	FALSE	TRUE	4.38354	loop_885	230000	7.45833	15	0.0469203	-0.046574	-0.0934943	0.981483	FALSE	FALSE	FALSE	10	12	6	13	4	8	3	2	6	8	13	12	4	8	7	5	5	5	4	4	15	7	8	10
chr1	88730000	88740000	10001	*	chr1	88870000	88880000	10001	*	TRUE	TRUE	TRUE	TRUE	3.39099	loop_886	150000	8.875	27	-0.167998	0.668361	0.83636	0.100114	FALSE	FALSE	FALSE	13	7	11	9	4	5	3	5	6	9	7	9	3	7	6	7	8	6	2	10	17	18	14	27
chr1	88970000	88980000	10001	*	chr1	90000000	90010000	10001	*	FALSE	FALSE	FALSE	TRUE	4.2151	loop_887	1040000	1.16667	4	1.09818	-0.0829422	-1.18113	0.534932	FALSE	FALSE	FALSE	2	1	0	1	0	1	1	0	0	3	3	0	3	0	1	4	0	0	0	0	2	1	3	2
chr1	88980000	88990000	10001	*	chr1	89750000	89760000	10001	*	FALSE	TRUE	FALSE	FALSE	3.49344	loop_888	780000	1.125	5	1.12333	-0.566625	-1.68996	0.407187	FALSE	FALSE	FALSE	4	1	0	0	0	0	1	1	2	1	3	5	1	2	0	1	0	0	0	0	3	1	1	0
chr1	88990000	89000000	10001	*	chr1	89350000	89360000	10001	*	TRUE	TRUE	TRUE	TRUE	4.30935	loop_889	370000	6.70833	12	0.238206	-0.00168509	-0.239891	0.859592	FALSE	FALSE	FALSE	11	10	10	7	3	3	5	1	9	7	8	12	4	8	4	9	4	4	9	2	6	6	10	9
chr1	88990000	89000000	10001	*	chr1	89450000	89460000	10001	*	TRUE	TRUE	TRUE	TRUE	5.62602	loop_890	470000	8.875	17	0.00667359	0.0678059	0.0611323	0.986555	FALSE	FALSE	FALSE	14	12	9	10	4	7	5	5	5	17	10	15	3	3	15	5	3	4	6	9	11	9	17	15
chr1	89000000	89010000	10001	*	chr1	89070000	89080000	10001	*	FALSE	TRUE	FALSE	FALSE	2.83062	loop_891	80000	8	21	0.332955	0.45117	0.118215	0.624368	FALSE	FALSE	FALSE	6	10	7	4	6	3	7	6	10	10	12	10	4	6	9	6	10	1	7	4	21	14	8	11
chr1	89080000	89090000	10001	*	chr1	89270000	89280000	10001	*	TRUE	FALSE	FALSE	TRUE	2.47429	loop_892	200000	5.66667	14	-0.35705	-0.772829	-0.415779	0.381409	FALSE	FALSE	FALSE	7	8	14	10	3	4	7	3	10	11	5	9	4	4	2	3	4	4	2	3	8	5	5	1
chr1	89080000	89090000	10001	*	chr1	89350000	89360000	10001	*	TRUE	TRUE	TRUE	TRUE	5.45882	loop_893	280000	12.6667	24	0.0939828	0.168035	0.0740526	0.909321	FALSE	FALSE	FALSE	18	17	19	15	7	7	2	8	14	14	21	20	12	9	7	8	14	9	4	6	16	16	17	24
chr1	89080000	89090000	10001	*	chr1	89450000	89460000	10001	*	TRUE	TRUE	TRUE	TRUE	4.52065	loop_894	380000	8.5	16	-0.220793	0.0369223	0.257715	0.831859	FALSE	FALSE	FALSE	16	9	14	16	6	3	3	4	12	4	13	14	5	7	5	4	7	10	5	5	13	11	8	10
chr1	89480000	89490000	10001	*	chr1	89590000	89600000	10001	*	FALSE	FALSE	TRUE	FALSE	4.59645	loop_895	120000	14.7917	29	0.107877	0.0247043	-0.0831726	0.945079	FALSE	FALSE	FALSE	23	20	18	14	6	15	8	8	29	27	16	17	7	11	14	10	14	10	14	11	15	12	21	15
chr1	89480000	89490000	10001	*	chr1	89760000	89770000	10001	*	TRUE	TRUE	TRUE	TRUE	6.84237	loop_896	290000	9.79167	21	0.56041	0.301406	-0.259004	0.388094	FALSE	FALSE	FALSE	9	7	12	8	5	9	3	7	20	21	18	9	7	7	9	7	8	7	6	7	16	8	15	10
chr1	89510000	89520000	10001	*	chr1	89590000	89600000	10001	*	TRUE	TRUE	FALSE	TRUE	4.26632	loop_897	90000	12.7917	23	0.0386753	-0.0449781	-0.0836534	0.973811	FALSE	FALSE	FALSE	16	16	20	22	8	9	5	5	23	16	17	20	7	9	7	12	13	6	6	13	14	17	14	12
chr1	89520000	89530000	10001	*	chr1	89990000	90000000	10001	*	FALSE	FALSE	FALSE	TRUE	2.94381	loop_898	480000	2.04167	6	0.649768	0.357418	-0.29235	0.77742	FALSE	FALSE	FALSE	2	1	2	1	3	0	2	1	2	3	4	2	1	2	6	1	3	2	2	1	0	4	2	2
chr1	89630000	89640000	10001	*	chr1	89760000	89770000	10001	*	TRUE	TRUE	TRUE	TRUE	5.14286	loop_899	140000	14.5417	30	-0.122397	-0.610352	-0.487955	0.193491	FALSE	FALSE	FALSE	18	20	18	30	8	13	7	17	26	26	24	16	14	11	8	6	7	5	11	8	21	12	9	14
chr1	89630000	89640000	10001	*	chr1	90000000	90010000	10001	*	TRUE	TRUE	FALSE	TRUE	3.04706	loop_900	380000	2.83333	8	0.852151	-0.0391533	-0.891305	0.372877	FALSE	FALSE	FALSE	0	3	3	3	3	2	2	1	6	4	8	3	4	3	3	3	3	1	2	4	3	2	2	0
chr1	89800000	89810000	10001	*	chr1	89980000	89990000	10001	*	TRUE	TRUE	TRUE	TRUE	7.92627	loop_901	190000	22.1667	41	0.229883	0.0570491	-0.172834	0.698504	FALSE	FALSE	FALSE	30	36	21	25	14	16	8	12	34	34	31	41	18	12	17	17	13	13	15	25	27	31	24	18
chr1	90100000	90110000	10001	*	chr1	91270000	91280000	10001	*	FALSE	FALSE	TRUE	FALSE	3.63067	loop_902	1180000	1.66667	6	-0.373273	0.586824	0.960097	0.677694	FALSE	FALSE	FALSE	1	3	4	0	3	1	0	0	2	1	2	4	1	0	0	0	3	2	0	0	3	2	6	2
chr1	90110000	90120000	10001	*	chr1	91050000	91060000	10001	*	FALSE	TRUE	FALSE	FALSE	3.19252	loop_903	950000	1.75	4	0.338745	-0.793457	-1.1322	0.552724	FALSE	FALSE	FALSE	4	4	3	2	0	0	2	0	4	2	4	1	3	3	0	2	1	1	1	0	0	2	1	2
chr1	90110000	90120000	10001	*	chr1	91160000	91170000	10001	*	TRUE	FALSE	FALSE	TRUE	3.30637	loop_904	1060000	2.375	6	-0.169151	-0.829005	-0.659854	0.635866	FALSE	FALSE	FALSE	3	6	2	2	0	0	3	6	4	3	2	2	5	3	1	1	0	3	0	1	3	1	3	3
chr1	90130000	90140000	10001	*	chr1	90570000	90580000	10001	*	TRUE	FALSE	TRUE	TRUE	2.60033	loop_905	450000	4.79167	12	-0.0307004	0.557423	0.588123	0.520132	FALSE	FALSE	FALSE	5	5	8	5	1	4	1	3	6	3	9	4	2	3	5	2	5	3	5	2	9	12	8	5
chr1	90720000	90730000	10001	*	chr1	90960000	90970000	10001	*	TRUE	FALSE	FALSE	TRUE	5.22375	loop_906	250000	4.54167	8	-0.43251	-0.743581	-0.311071	0.460706	FALSE	FALSE	FALSE	4	8	7	5	3	4	7	6	8	8	6	5	3	2	2	2	3	0	3	1	6	4	5	7
chr1	90720000	90730000	10001	*	chr1	91160000	91170000	10001	*	TRUE	TRUE	TRUE	TRUE	2.68752	loop_907	450000	4.79167	11	0.0791408	0.533961	0.454821	0.615887	FALSE	FALSE	FALSE	4	8	7	6	1	2	2	3	8	11	5	4	4	1	4	1	6	4	6	4	4	9	5	6
chr1	91020000	91030000	10001	*	chr1	91160000	91170000	10001	*	FALSE	FALSE	TRUE	FALSE	4.14592	loop_908	150000	5	16	-0.336188	1.12601	1.4622	0.0118054	FALSE	TRUE	TRUE	4	2	5	4	0	3	4	5	4	5	2	2	1	4	1	4	5	5	3	3	14	16	13	11
chr1	91160000	91170000	10001	*	chr1	91270000	91280000	10001	*	FALSE	FALSE	FALSE	TRUE	5.15158	loop_909	120000	8.125	17	-0.189964	-0.191519	-0.00155507	0.892843	FALSE	FALSE	FALSE	9	12	7	17	9	4	6	5	7	14	11	7	7	6	8	5	5	6	9	9	13	6	10	3
chr1	91160000	91170000	10001	*	chr1	91400000	91410000	10001	*	TRUE	FALSE	FALSE	TRUE	3.27877	loop_910	250000	3.58333	8	-0.632564	-0.183826	0.448738	0.655982	FALSE	FALSE	FALSE	5	3	7	8	1	0	3	7	5	2	1	3	2	4	3	2	2	2	5	4	6	2	5	4
chr1	91280000	91290000	10001	*	chr1	91400000	91410000	10001	*	TRUE	TRUE	TRUE	TRUE	4.08417	loop_911	130000	7.66667	13	-0.0983652	-0.0978637	0.00050149	0.973018	FALSE	FALSE	FALSE	6	11	11	6	9	8	6	4	12	5	10	11	6	7	6	5	2	9	4	11	13	7	3	12
chr1	91280000	91290000	10001	*	chr1	91920000	91930000	10001	*	FALSE	FALSE	TRUE	TRUE	4.99289	loop_912	650000	2.125	7	1.30417	2.54354	1.23937	0.0183752	TRUE	TRUE	TRUE	2	1	1	1	0	0	0	0	0	2	0	2	2	3	2	2	4	3	2	1	7	4	6	6
chr1	91510000	91520000	10001	*	chr1	91920000	91930000	10001	*	TRUE	TRUE	TRUE	TRUE	7.56701	loop_913	420000	13.3333	27	-0.0855055	-0.198988	-0.113482	0.86748	FALSE	FALSE	FALSE	24	15	21	21	5	6	10	10	18	15	23	27	8	12	3	8	8	10	11	6	14	14	18	13
chr1	91510000	91520000	10001	*	chr1	92280000	92290000	10001	*	TRUE	TRUE	FALSE	TRUE	4.6709	loop_914	780000	2.125	8	0.425668	-0.901709	-1.32738	0.384846	FALSE	FALSE	FALSE	2	4	3	4	1	2	1	0	5	3	8	3	3	1	1	1	1	0	0	0	1	2	1	4
chr1	91530000	91540000	10001	*	chr1	91690000	91700000	10001	*	TRUE	TRUE	FALSE	TRUE	3.13187	loop_915	170000	6.91667	12	-0.156592	-0.890085	-0.733494	0.185514	FALSE	FALSE	FALSE	7	11	8	7	9	6	6	11	7	10	12	7	7	9	5	6	1	3	5	8	11	5	3	2
chr1	91660000	91670000	10001	*	chr1	91910000	91920000	10001	*	FALSE	FALSE	TRUE	FALSE	3.49371	loop_916	260000	3.125	8	0.436155	0.936164	0.500009	0.485128	FALSE	FALSE	FALSE	5	2	6	1	0	1	1	1	4	4	3	5	2	1	4	1	4	2	1	0	6	8	7	6
chr1	91740000	91750000	10001	*	chr1	91880000	91890000	10001	*	TRUE	TRUE	TRUE	TRUE	2.67131	loop_917	150000	7.125	13	-0.174417	-0.454957	-0.28054	0.661537	FALSE	FALSE	FALSE	9	5	13	13	6	5	7	5	5	9	7	6	10	5	12	5	4	7	3	6	11	6	8	4
chr1	91800000	91810000	10001	*	chr1	91880000	91890000	10001	*	TRUE	FALSE	FALSE	FALSE	2.7877	loop_918	90000	7.41667	17	-0.424096	-1.13632	-0.712225	0.0535079	FALSE	FALSE	FALSE	6	14	11	17	5	8	9	8	11	9	5	14	9	2	7	6	5	2	2	9	6	5	2	6
chr1	91990000	92000000	10001	*	chr1	92280000	92290000	10001	*	TRUE	TRUE	TRUE	TRUE	6.92906	loop_919	300000	6.66667	13	-0.121577	0.0951463	0.216724	0.918965	FALSE	FALSE	FALSE	10	9	10	13	3	2	2	4	12	4	8	7	9	2	3	6	3	8	3	3	8	7	13	11
chr1	92000000	92010000	10001	*	chr1	92630000	92640000	10001	*	TRUE	TRUE	TRUE	TRUE	4.21794	loop_920	640000	1.5	3	1.15483	1.96775	0.812919	0.2008	FALSE	FALSE	FALSE	2	0	1	2	0	0	0	0	2	1	3	0	2	0	3	1	2	1	2	3	3	3	3	2
chr1	92310000	92320000	10001	*	chr1	92590000	92600000	10001	*	TRUE	TRUE	TRUE	TRUE	5.40043	loop_921	290000	5.54167	13	-0.557148	-0.659272	-0.102124	0.456689	FALSE	FALSE	FALSE	10	13	7	7	5	3	5	4	8	7	5	9	4	0	4	3	4	1	0	0	13	7	8	6
chr1	92310000	92320000	10001	*	chr1	92820000	92830000	10001	*	FALSE	TRUE	FALSE	TRUE	3.62421	loop_922	520000	2.04167	5	1.36058	1.29954	-0.0610394	0.306843	FALSE	FALSE	FALSE	1	1	2	3	0	0	0	1	3	3	3	2	2	1	2	5	4	1	1	1	4	3	4	2
chr1	92460000	92470000	10001	*	chr1	92600000	92610000	10001	*	TRUE	TRUE	FALSE	TRUE	3.08346	loop_923	150000	5.83333	12	0.0874886	-0.175247	-0.262736	0.888447	FALSE	FALSE	FALSE	8	9	5	12	2	3	4	4	10	8	9	8	8	4	2	4	5	8	3	2	6	1	7	8
chr1	92750000	92760000	10001	*	chr1	92810000	92820000	10001	*	TRUE	TRUE	TRUE	TRUE	4.28729	loop_924	70000	9.25	19	-0.428499	-0.0235849	0.404914	0.531452	FALSE	FALSE	FALSE	10	9	9	19	8	7	7	10	12	13	7	13	5	7	3	4	9	4	8	12	12	13	10	11
chr1	92850000	92860000	10001	*	chr1	92960000	92970000	10001	*	TRUE	FALSE	TRUE	TRUE	5.33371	loop_925	120000	13.25	22	0.0810163	0.144143	0.0631271	0.92156	FALSE	FALSE	FALSE	20	11	20	13	11	6	8	7	15	15	13	18	18	9	11	9	13	6	8	10	22	17	18	20
chr1	92850000	92860000	10001	*	chr1	92990000	93000000	10001	*	FALSE	TRUE	TRUE	TRUE	8.25826	loop_926	150000	17.4583	36	0.274534	-0.0544737	-0.329007	0.542817	FALSE	FALSE	FALSE	19	16	19	22	17	14	8	12	36	20	24	28	9	21	10	19	13	9	21	14	21	15	16	16
chr1	93020000	93030000	10001	*	chr1	93060000	93070000	10001	*	TRUE	TRUE	FALSE	TRUE	2.74577	loop_927	50000	12.75	20	0.147891	0.0998439	-0.0480471	0.914977	FALSE	FALSE	FALSE	18	15	16	14	5	5	13	7	16	15	16	20	9	9	13	12	7	9	9	13	15	14	18	18
chr1	93080000	93090000	10001	*	chr1	93170000	93180000	10001	*	TRUE	FALSE	FALSE	FALSE	3.62508	loop_928	100000	6.20833	12	-0.25166	-0.473112	-0.221453	0.66494	FALSE	FALSE	FALSE	8	6	12	10	7	5	4	4	10	5	10	11	6	0	5	5	5	4	5	2	4	5	9	7
chr1	93200000	93210000	10001	*	chr1	93230000	93240000	10001	*	TRUE	FALSE	FALSE	FALSE	2.19436	loop_929	40000	9.54167	21	-0.522817	0.120218	0.643035	0.291366	FALSE	FALSE	FALSE	16	11	13	18	5	5	6	6	14	11	10	9	2	3	5	6	5	6	5	7	16	15	21	14
chr1	93300000	93310000	10001	*	chr1	93550000	93560000	10001	*	TRUE	TRUE	TRUE	TRUE	3.32935	loop_930	260000	3.83333	12	0.314382	0.891591	0.577209	0.394563	FALSE	FALSE	FALSE	5	3	3	3	0	2	1	3	4	5	3	2	3	4	4	2	3	0	5	1	10	8	12	6
chr1	93300000	93310000	10001	*	chr1	93350000	93360000	10001	*	TRUE	FALSE	FALSE	FALSE	2.4459	loop_931	60000	9.54167	17	-0.33241	-0.0526973	0.279713	0.715675	FALSE	FALSE	FALSE	14	17	11	16	4	6	8	4	17	8	7	11	7	6	7	5	8	5	5	4	15	15	17	12
chr1	93300000	93310000	10001	*	chr1	93430000	93440000	10001	*	TRUE	TRUE	TRUE	TRUE	3.21737	loop_932	140000	7.45833	16	-0.140514	0.437135	0.577649	0.445914	FALSE	FALSE	FALSE	14	15	5	5	4	3	5	3	5	10	11	5	6	5	4	5	12	7	3	5	16	11	10	10
chr1	93300000	93310000	10001	*	chr1	93850000	93860000	10001	*	TRUE	TRUE	TRUE	TRUE	5.34669	loop_933	560000	4.16667	13	0.396916	0.651476	0.25456	0.628881	FALSE	FALSE	FALSE	7	1	5	6	2	2	0	2	8	6	1	5	1	5	4	4	3	3	5	2	13	3	6	6
chr1	93430000	93440000	10001	*	chr1	93850000	93860000	10001	*	TRUE	TRUE	TRUE	TRUE	7.8415	loop_934	430000	6.54167	13	0.361943	0.272892	-0.0890505	0.767537	FALSE	FALSE	FALSE	9	7	6	5	3	6	3	4	6	9	13	5	6	5	9	6	3	9	3	6	9	8	6	11
chr1	93440000	93450000	10001	*	chr1	93550000	93560000	10001	*	TRUE	TRUE	TRUE	TRUE	4.16363	loop_935	120000	8.58333	15	-0.356286	0.00502774	0.361314	0.675483	FALSE	FALSE	FALSE	11	15	12	13	4	8	6	2	11	8	12	6	6	7	3	6	10	3	3	3	14	15	13	15
chr1	93440000	93450000	10001	*	chr1	93620000	93630000	10001	*	FALSE	TRUE	TRUE	TRUE	4.37774	loop_936	190000	6.5	16	0.0882701	0.679533	0.591263	0.346801	FALSE	FALSE	FALSE	7	7	8	11	3	2	2	2	8	7	11	5	5	2	1	8	6	6	3	6	11	9	16	10
chr1	93570000	93580000	10001	*	chr1	93840000	93850000	10001	*	FALSE	FALSE	TRUE	FALSE	2.96918	loop_937	280000	6.25	15	0.369846	0.295411	-0.0744342	0.775449	FALSE	FALSE	FALSE	8	2	5	9	4	3	7	2	7	11	10	9	5	4	5	5	4	1	3	6	7	15	11	7
chr1	93620000	93630000	10001	*	chr1	93810000	93820000	10001	*	TRUE	TRUE	TRUE	TRUE	4.93078	loop_938	200000	13.5	34	0.386894	0.533293	0.146398	0.316164	FALSE	FALSE	FALSE	14	16	12	13	3	9	9	6	17	17	16	25	8	15	9	8	8	10	8	11	17	24	15	34
chr1	93680000	93690000	10001	*	chr1	93810000	93820000	10001	*	TRUE	TRUE	TRUE	TRUE	3.6415	loop_939	140000	11.75	24	0.327605	0.619046	0.291441	0.265525	FALSE	FALSE	FALSE	9	11	7	14	9	10	5	5	19	18	12	14	7	11	8	6	9	8	5	12	13	24	22	24
chr1	93750000	93760000	10001	*	chr1	93810000	93820000	10001	*	FALSE	TRUE	TRUE	TRUE	2.40136	loop_940	70000	10.2917	19	-0.11933	0.0985016	0.217831	0.870146	FALSE	FALSE	FALSE	6	12	6	13	12	10	10	8	10	5	19	13	7	8	5	10	10	6	6	8	16	14	18	15
chr1	93910000	93920000	10001	*	chr1	93950000	93960000	10001	*	FALSE	FALSE	TRUE	FALSE	2.23393	loop_941	50000	5.83333	14	0.271734	0.692776	0.421042	0.442399	FALSE	FALSE	FALSE	6	5	3	5	2	5	7	1	7	7	11	6	6	1	5	2	4	5	2	5	11	12	8	14
chr1	93910000	93920000	10001	*	chr1	94000000	94010000	10001	*	FALSE	TRUE	TRUE	TRUE	2.38556	loop_942	100000	2.875	6	-0.167907	-0.0417678	0.126139	0.973561	FALSE	FALSE	FALSE	5	4	4	2	1	1	2	4	6	6	2	2	3	1	0	3	3	1	2	4	6	3	1	3
chr1	94030000	94040000	10001	*	chr1	94460000	94470000	10001	*	FALSE	TRUE	TRUE	TRUE	4.04651	loop_943	440000	5.16667	16	0.907661	1.08308	0.175422	0.177045	FALSE	FALSE	FALSE	3	3	7	3	2	1	3	1	8	7	9	6	3	7	3	3	4	1	1	6	16	6	13	8
chr1	94040000	94050000	10001	*	chr1	94800000	94810000	10001	*	TRUE	TRUE	TRUE	TRUE	3.25929	loop_944	770000	1.41667	6	1.30542	0.288859	-1.01656	0.440745	FALSE	FALSE	FALSE	1	1	1	2	1	0	0	1	2	2	6	3	3	1	0	1	1	0	0	1	2	2	0	3
chr1	94050000	94060000	10001	*	chr1	94330000	94340000	10001	*	TRUE	TRUE	TRUE	TRUE	6.71037	loop_945	290000	13.3333	28	0.380479	-0.0567576	-0.437236	0.360867	FALSE	FALSE	FALSE	18	10	11	14	9	11	7	12	28	22	15	17	14	10	12	12	9	5	9	5	22	17	14	17
chr1	94060000	94070000	10001	*	chr1	94170000	94180000	10001	*	TRUE	TRUE	TRUE	TRUE	2.81912	loop_946	120000	8.58333	18	-0.480738	-0.175431	0.305307	0.541398	FALSE	FALSE	FALSE	8	9	15	15	6	6	9	8	8	12	9	9	5	6	7	3	8	6	6	5	18	10	8	10
chr1	94240000	94250000	10001	*	chr1	94320000	94330000	10001	*	TRUE	TRUE	TRUE	TRUE	5.53093	loop_947	90000	15.6667	34	0.279826	0.817683	0.537857	0.0200138	FALSE	TRUE	FALSE	15	16	11	18	7	7	8	8	20	13	18	21	15	15	7	8	12	17	13	12	34	25	26	30
chr1	94330000	94340000	10001	*	chr1	94460000	94470000	10001	*	TRUE	TRUE	TRUE	TRUE	4.93686	loop_948	140000	6.54167	18	-0.0720304	0.265634	0.337664	0.807826	FALSE	FALSE	FALSE	12	11	8	6	3	4	5	0	18	9	6	8	4	2	5	0	2	3	7	5	14	8	11	6
chr1	94490000	94500000	10001	*	chr1	95050000	95060000	10001	*	FALSE	TRUE	FALSE	FALSE	6.07568	loop_949	570000	1.91667	7	1.74679	1.58438	-0.16241	0.217088	FALSE	FALSE	FALSE	0	1	1	2	0	0	2	0	3	3	2	2	3	0	6	2	2	2	2	1	2	3	0	7
chr1	94520000	94530000	10001	*	chr1	94800000	94810000	10001	*	TRUE	TRUE	TRUE	TRUE	9.00824	loop_950	290000	21.625	34	0.10672	0.0689392	-0.0377803	0.924058	FALSE	FALSE	FALSE	22	22	25	29	11	15	14	21	34	26	28	32	17	16	19	13	17	13	17	16	33	27	21	31
chr1	94520000	94530000	10001	*	chr1	95040000	95050000	10001	*	FALSE	FALSE	TRUE	TRUE	4.48557	loop_951	530000	3.04167	11	0.133289	0.683163	0.549873	0.662055	FALSE	FALSE	FALSE	5	8	1	4	1	0	1	0	4	4	2	3	3	2	2	2	3	1	4	2	4	1	5	11
chr1	94540000	94550000	10001	*	chr1	94590000	94600000	10001	*	TRUE	TRUE	TRUE	TRUE	2.85192	loop_952	60000	15.2083	26	0.411579	-0.150151	-0.56173	0.185714	FALSE	FALSE	FALSE	22	9	22	13	14	8	9	10	25	26	22	20	13	18	15	14	7	7	10	7	16	21	18	19
chr1	94540000	94550000	10001	*	chr1	94730000	94740000	10001	*	TRUE	TRUE	FALSE	TRUE	3.26177	loop_953	200000	7.95833	15	0.671609	0.420161	-0.251448	0.346532	FALSE	FALSE	FALSE	5	3	6	10	6	6	8	1	13	13	15	12	6	7	10	3	5	7	4	2	12	12	13	12
chr1	94600000	94610000	10001	*	chr1	94800000	94810000	10001	*	TRUE	TRUE	TRUE	TRUE	3.16594	loop_954	210000	8	18	0.514154	-0.165996	-0.68015	0.254714	FALSE	FALSE	FALSE	7	4	6	7	7	5	9	9	8	9	13	18	8	9	11	7	5	5	5	2	10	10	9	9
chr1	94640000	94650000	10001	*	chr1	94790000	94800000	10001	*	FALSE	TRUE	TRUE	FALSE	3.06781	loop_955	160000	8.08333	14	0.547202	0.333913	-0.213289	0.498411	FALSE	FALSE	FALSE	4	8	10	8	9	5	3	2	14	10	14	14	5	4	6	11	5	6	4	4	10	13	12	13
chr1	94730000	94740000	10001	*	chr1	94790000	94800000	10001	*	TRUE	TRUE	TRUE	TRUE	2.51971	loop_956	70000	10.5417	23	0.370909	0.152119	-0.218789	0.652137	FALSE	FALSE	FALSE	7	12	15	8	12	7	2	6	15	16	16	9	12	9	14	6	7	7	6	3	23	14	12	15
chr1	94850000	94860000	10001	*	chr1	94920000	94930000	10001	*	TRUE	TRUE	TRUE	TRUE	2.89909	loop_957	80000	11.4167	27	0.149256	0.618345	0.469088	0.243902	FALSE	FALSE	FALSE	10	14	3	13	10	6	8	7	12	18	11	18	5	8	6	8	6	11	10	11	27	12	21	19
chr1	94850000	94860000	10001	*	chr1	94970000	94980000	10001	*	TRUE	FALSE	FALSE	FALSE	3.24648	loop_958	130000	6.75	13	-0.0161557	-0.585884	-0.569729	0.445657	FALSE	FALSE	FALSE	8	10	8	7	1	6	9	9	13	13	10	11	3	3	4	6	2	3	3	3	7	8	8	7
chr1	94850000	94860000	10001	*	chr1	95040000	95050000	10001	*	TRUE	TRUE	TRUE	TRUE	12.0308	loop_959	200000	19.0833	37	0.328233	-0.0680468	-0.39628	0.355093	FALSE	FALSE	FALSE	17	18	29	25	10	15	14	10	32	37	25	34	20	9	14	17	16	16	14	10	20	12	26	18
chr1	94860000	94870000	10001	*	chr1	95220000	95230000	10001	*	FALSE	TRUE	TRUE	TRUE	4.73355	loop_960	370000	2.41667	7	1.39135	1.44556	0.0542118	0.202068	FALSE	FALSE	FALSE	1	2	2	2	1	0	0	1	7	4	4	5	2	2	1	1	4	0	3	3	3	3	3	4
chr1	94920000	94930000	10001	*	chr1	95040000	95050000	10001	*	TRUE	TRUE	TRUE	TRUE	3.8488	loop_961	130000	10	19	0.121436	0.186347	0.064911	0.904226	FALSE	FALSE	FALSE	11	12	10	16	5	3	6	9	16	17	5	18	11	5	4	9	10	5	6	11	11	19	7	14
chr1	94920000	94930000	10001	*	chr1	95230000	95240000	10001	*	FALSE	FALSE	TRUE	FALSE	3.02091	loop_962	320000	2.29167	5	0.694502	1.21461	0.520106	0.370335	FALSE	FALSE	FALSE	1	2	1	3	1	2	0	1	4	4	3	1	2	1	1	3	4	3	4	1	3	3	2	5
chr1	95080000	95090000	10001	*	chr1	95230000	95240000	10001	*	TRUE	TRUE	TRUE	TRUE	4.16172	loop_963	160000	8.66667	18	0.0407072	-0.0870556	-0.127763	0.959576	FALSE	FALSE	FALSE	14	9	7	13	3	5	7	9	15	13	16	9	8	5	4	5	5	5	8	2	11	8	9	18
chr1	95090000	95100000	10001	*	chr1	95470000	95480000	10001	*	FALSE	FALSE	TRUE	FALSE	2.47753	loop_964	390000	1.25	4	0.757942	2.16581	1.40787	0.166078	FALSE	FALSE	FALSE	2	0	0	1	0	0	0	1	1	0	3	0	0	1	0	2	3	3	0	1	2	4	2	4
chr1	95290000	95300000	10001	*	chr1	96900000	96910000	10001	*	TRUE	FALSE	FALSE	FALSE	4.68901	loop_965	1620000	0.333333	2	-2.44387	-2.40337	0	0.194989	FALSE	FALSE	FALSE	1	1	1	2	1	1	0	1	0	0	0	0	0	0	0	0	0	0	0	0	0	0	0	0
chr1	95300000	95310000	10001	*	chr1	96230000	96240000	10001	*	TRUE	FALSE	FALSE	TRUE	3.37729	loop_966	940000	2.54167	6	-1.24644	0.0681984	1.31464	0.219893	FALSE	FALSE	FALSE	5	5	4	1	2	2	3	2	3	2	1	1	1	0	2	1	2	3	3	2	4	4	6	2
chr1	95310000	95320000	10001	*	chr1	96840000	96850000	10001	*	FALSE	FALSE	TRUE	TRUE	3.25218	loop_967	1540000	1.79167	6	-0.880703	0.240928	1.12163	0.533462	FALSE	FALSE	FALSE	1	4	4	0	0	2	4	0	0	2	1	0	2	1	1	1	0	1	2	1	5	4	6	1
chr1	95960000	95970000	10001	*	chr1	96680000	96690000	10001	*	FALSE	FALSE	FALSE	TRUE	2.47948	loop_968	730000	1.625	5	0.186262	-0.40091	-0.587172	0.872521	FALSE	FALSE	FALSE	0	5	2	5	1	0	1	0	3	0	4	4	2	0	2	1	1	2	0	3	2	1	0	0
chr1	96080000	96090000	10001	*	chr1	96840000	96850000	10001	*	FALSE	FALSE	FALSE	TRUE	2.38108	loop_969	770000	2.5	6	-0.058813	0.172421	0.231234	0.958624	FALSE	FALSE	FALSE	2	5	5	3	0	2	2	0	2	3	2	4	4	1	1	2	3	1	1	2	5	6	1	3
chr1	96230000	96240000	10001	*	chr1	96440000	96450000	10001	*	FALSE	TRUE	FALSE	FALSE	2.29576	loop_970	220000	4.625	13	-0.0102719	-0.309289	-0.299018	0.86341	FALSE	FALSE	FALSE	5	4	8	9	1	4	4	3	5	13	8	4	3	2	2	4	3	1	3	0	8	4	6	7
chr1	96230000	96240000	10001	*	chr1	96720000	96730000	10001	*	FALSE	TRUE	TRUE	TRUE	3.29079	loop_971	500000	4.33333	11	1.7517	1.06232	-0.689375	0.014298	TRUE	TRUE	TRUE	2	1	4	3	1	1	1	2	10	7	5	11	6	4	5	6	2	3	3	0	5	7	9	6
chr1	96240000	96250000	10001	*	chr1	96840000	96850000	10001	*	TRUE	FALSE	FALSE	TRUE	3.69145	loop_972	610000	1.25	5	-0.163006	1.10943	1.27244	0.47158	FALSE	FALSE	FALSE	0	1	2	1	1	0	0	2	2	1	0	2	0	1	1	0	1	1	2	3	5	1	0	3
chr1	96240000	96250000	10001	*	chr1	96400000	96410000	10001	*	TRUE	FALSE	FALSE	TRUE	3.4155	loop_973	170000	2.08333	7	-0.122796	-1.6268	-1.504	0.211511	FALSE	FALSE	FALSE	5	7	3	1	2	1	2	1	5	2	3	2	3	2	1	3	3	0	2	0	1	0	0	1
chr1	96240000	96250000	10001	*	chr1	96480000	96490000	10001	*	TRUE	FALSE	FALSE	FALSE	3.00401	loop_974	250000	1.625	4	0.104828	-1.31377	-1.4186	0.405151	FALSE	FALSE	FALSE	4	1	4	0	3	2	0	1	4	3	0	2	0	2	2	4	1	0	0	0	0	2	2	2
chr1	96240000	96250000	10001	*	chr1	96660000	96670000	10001	*	TRUE	FALSE	FALSE	FALSE	3.3074	loop_975	430000	1.70833	4	-0.526403	0.0824216	0.608824	0.808577	FALSE	FALSE	FALSE	4	3	2	2	2	0	0	2	0	3	1	3	1	1	1	1	2	1	2	2	2	3	2	1
chr1	96960000	96970000	10001	*	chr1	97050000	97060000	10001	*	TRUE	TRUE	FALSE	TRUE	4.12032	loop_976	100000	7.875	17	-0.0414513	-0.765487	-0.724036	0.214739	FALSE	FALSE	FALSE	9	10	13	12	6	5	3	12	17	7	16	7	7	6	9	6	4	1	9	2	10	8	6	4
chr1	96960000	96970000	10001	*	chr1	97530000	97540000	10001	*	TRUE	TRUE	TRUE	TRUE	3.55625	loop_977	580000	2.25	6	-0.0727289	1.22555	1.29827	0.215737	FALSE	FALSE	FALSE	2	2	2	5	0	1	1	0	5	0	2	1	0	1	3	1	4	1	4	4	2	5	6	2
chr1	96960000	96970000	10001	*	chr1	97810000	97820000	10001	*	TRUE	FALSE	TRUE	TRUE	3.11702	loop_978	860000	1.66667	5	-0.566355	-1.03234	-0.465983	0.643291	FALSE	FALSE	FALSE	2	4	1	5	2	0	1	2	5	2	1	1	1	1	1	1	0	0	1	0	5	4	0	0
chr1	96960000	96970000	10001	*	chr1	98050000	98060000	10001	*	TRUE	TRUE	TRUE	TRUE	3.6545	loop_979	1100000	2.25	7	-1.34877	0.529005	1.87777	0.124308	FALSE	FALSE	FALSE	3	1	1	3	1	5	3	1	4	1	2	0	0	0	0	1	1	4	3	3	5	7	1	4
chr1	96980000	96990000	10001	*	chr1	98470000	98480000	10001	*	FALSE	FALSE	FALSE	TRUE	2.89764	loop_980	1500000	1.54167	6	-0.565054	0.0374814	0.602535	0.840971	FALSE	FALSE	FALSE	6	2	0	2	1	1	0	1	0	1	1	1	3	1	0	2	1	0	0	1	2	4	5	2
chr1	97100000	97110000	10001	*	chr1	98470000	98480000	10001	*	TRUE	FALSE	FALSE	TRUE	3.13574	loop_981	1380000	1.66667	5	-0.435682	-0.439632	-0.00394932	0.88389	FALSE	FALSE	FALSE	1	3	1	4	1	2	1	2	0	0	5	3	2	0	0	2	0	1	1	0	1	3	3	4
chr1	97130000	97140000	10001	*	chr1	97520000	97530000	10001	*	TRUE	FALSE	FALSE	TRUE	3.19872	loop_982	400000	3.45833	8	-1.05291	-0.688825	0.364087	0.318136	FALSE	FALSE	FALSE	6	6	5	8	6	2	4	1	1	8	7	1	2	0	1	1	3	0	1	3	4	6	4	3
chr1	97140000	97150000	10001	*	chr1	98040000	98050000	10001	*	FALSE	FALSE	TRUE	FALSE	2.90354	loop_983	910000	1.95833	4	-0.324527	0.677552	1.00208	0.523084	FALSE	FALSE	FALSE	1	3	2	4	1	1	1	1	4	1	1	3	0	2	0	1	2	2	2	3	2	3	4	3
chr1	97140000	97150000	10001	*	chr1	98460000	98470000	10001	*	FALSE	FALSE	TRUE	FALSE	2.99897	loop_984	1330000	1.83333	5	0.232168	1.25993	1.02776	0.347326	FALSE	FALSE	FALSE	4	1	2	1	0	1	1	0	2	2	1	2	2	2	1	0	3	2	3	4	0	1	4	5
chr1	97180000	97190000	10001	*	chr1	97800000	97810000	10001	*	TRUE	FALSE	FALSE	FALSE	2.48323	loop_985	630000	2.08333	7	-0.248358	-0.341802	-0.0934439	0.927668	FALSE	FALSE	FALSE	3	2	7	2	1	1	2	0	2	1	3	1	4	1	3	1	1	0	1	1	3	1	4	5
chr1	97190000	97200000	10001	*	chr1	98050000	98060000	10001	*	FALSE	FALSE	FALSE	TRUE	2.50594	loop_986	870000	2.08333	6	-0.871809	-0.386254	0.485555	0.638929	FALSE	FALSE	FALSE	6	3	4	2	1	1	3	1	2	2	2	5	0	0	0	2	0	1	1	2	4	4	2	2
chr1	97230000	97240000	10001	*	chr1	97820000	97830000	10001	*	FALSE	TRUE	FALSE	TRUE	3.20557	loop_987	600000	1.75	5	-0.355455	-0.348539	0.00691605	0.923648	FALSE	FALSE	FALSE	3	4	2	5	0	0	1	1	3	1	2	1	3	2	0	1	0	2	1	0	3	3	4	0
chr1	97230000	97240000	10001	*	chr1	98460000	98470000	10001	*	FALSE	TRUE	TRUE	TRUE	3.24614	loop_988	1240000	1.58333	5	1.14913	1.90982	0.760691	0.221415	FALSE	FALSE	FALSE	0	1	1	0	1	2	0	0	4	2	1	0	2	0	0	3	1	3	1	2	4	5	2	3
chr1	97240000	97250000	10001	*	chr1	97520000	97530000	10001	*	TRUE	TRUE	TRUE	TRUE	3.06738	loop_989	290000	3.91667	9	0.301039	0.506389	0.20535	0.754539	FALSE	FALSE	FALSE	2	6	5	5	0	4	2	1	6	3	6	4	2	4	3	4	4	4	2	1	7	6	4	9
chr1	97250000	97260000	10001	*	chr1	98060000	98070000	10001	*	FALSE	FALSE	TRUE	FALSE	2.3919	loop_990	820000	1.41667	4	0.747108	2.0278	1.28069	0.154108	FALSE	FALSE	FALSE	0	2	2	0	0	1	0	0	3	2	0	0	1	0	2	1	2	3	1	3	4	4	2	1
chr1	97400000	97410000	10001	*	chr1	98470000	98480000	10001	*	TRUE	FALSE	FALSE	FALSE	3.34199	loop_991	1080000	1.25	5	-1.12357	-0.649543	0.474026	0.646051	FALSE	FALSE	FALSE	1	3	1	2	1	4	0	1	0	1	5	0	0	1	1	0	0	0	4	1	1	1	1	1
chr1	97530000	97540000	10001	*	chr1	98460000	98470000	10001	*	FALSE	TRUE	FALSE	FALSE	3.27469	loop_992	940000	1.91667	6	0.409913	0.436512	0.0265991	0.885226	FALSE	FALSE	FALSE	1	1	2	4	3	0	0	1	3	3	1	5	1	1	2	1	2	2	0	1	6	1	4	1
chr1	97660000	97670000	10001	*	chr1	97810000	97820000	10001	*	TRUE	TRUE	FALSE	TRUE	3.25442	loop_993	160000	3.70833	10	-0.688447	-0.996899	-0.308451	0.296161	FALSE	FALSE	FALSE	10	4	9	9	3	5	2	0	3	6	3	4	2	3	3	3	1	2	2	4	3	2	4	2
chr1	97660000	97670000	10001	*	chr1	98050000	98060000	10001	*	TRUE	TRUE	TRUE	TRUE	3.49183	loop_994	400000	3.33333	9	-0.922855	0.0155438	0.938399	0.358851	FALSE	FALSE	FALSE	4	9	7	3	2	1	3	2	3	2	3	2	0	1	2	4	2	4	2	2	8	7	3	4
chr1	97660000	97670000	10001	*	chr1	98460000	98470000	10001	*	TRUE	FALSE	TRUE	TRUE	3.46506	loop_995	810000	2.04167	7	-0.419746	0.135234	0.554979	0.83575	FALSE	FALSE	FALSE	4	7	0	4	2	0	1	0	4	3	2	2	0	1	1	1	1	1	3	1	4	3	1	3
chr1	97820000	97830000	10001	*	chr1	98030000	98040000	10001	*	TRUE	FALSE	TRUE	TRUE	2.88528	loop_996	220000	2.95833	7	-0.790226	-0.712523	0.0777025	0.479923	FALSE	FALSE	FALSE	7	2	7	6	3	1	3	3	5	1	3	4	1	2	4	0	1	2	4	2	2	3	4	1
chr1	97820000	97830000	10001	*	chr1	98470000	98480000	10001	*	FALSE	TRUE	TRUE	TRUE	3.52217	loop_997	660000	2.25	7	0.594376	1.02154	0.427165	0.533811	FALSE	FALSE	FALSE	0	2	2	2	1	0	2	2	2	4	3	4	1	3	1	0	1	0	1	4	7	5	3	4
chr1	97920000	97930000	10001	*	chr1	98040000	98050000	10001	*	FALSE	TRUE	FALSE	TRUE	2.81053	loop_998	130000	6.75	17	0.148186	0.399341	0.251155	0.757798	FALSE	FALSE	FALSE	9	13	7	7	3	3	1	3	8	10	12	3	2	2	11	6	6	4	4	5	17	10	9	7
chr1	98050000	98060000	10001	*	chr1	98460000	98470000	10001	*	TRUE	TRUE	TRUE	TRUE	4.22859	loop_999	420000	7.29167	21	-0.0265033	-0.0106401	0.0158631	0.998349	FALSE	FALSE	FALSE	11	9	14	11	4	2	3	4	21	9	8	9	4	1	6	5	12	1	8	4	10	7	4	8
chr1	98100000	98110000	10001	*	chr1	98320000	98330000	10001	*	FALSE	TRUE	FALSE	FALSE	2.63903	loop_1000	230000	3.75	11	0.696038	0.303166	-0.392873	0.615227	FALSE	FALSE	FALSE	5	4	3	2	1	1	1	5	11	4	4	7	2	1	7	3	0	0	3	7	7	5	2	5
chr1	98150000	98160000	10001	*	chr1	98450000	98460000	10001	*	FALSE	FALSE	FALSE	TRUE	2.47237	loop_1001	310000	3.58333	11	0.357876	0.930511	0.572634	0.408437	FALSE	FALSE	FALSE	3	6	0	6	1	3	1	0	3	6	4	2	2	4	3	2	2	3	1	5	11	5	4	9
chr1	98250000	98260000	10001	*	chr1	98440000	98450000	10001	*	FALSE	FALSE	TRUE	FALSE	2.09551	loop_1002	200000	3.125	7	-0.443627	0.40996	0.853588	0.551336	FALSE	FALSE	FALSE	4	5	7	1	2	3	0	2	2	4	7	1	0	2	0	3	5	2	1	2	7	6	3	6
chr1	98330000	98340000	10001	*	chr1	98460000	98470000	10001	*	FALSE	TRUE	FALSE	FALSE	2.95779	loop_1003	140000	4.58333	11	0.331004	-0.538832	-0.869836	0.381824	FALSE	FALSE	FALSE	7	8	8	2	5	3	2	1	8	8	11	8	4	5	4	1	1	2	0	3	5	4	3	7
chr1	98790000	98800000	10001	*	chr1	98980000	98990000	10001	*	FALSE	TRUE	FALSE	TRUE	3.06966	loop_1004	200000	5.45833	12	0.031317	-0.127854	-0.159171	0.9568	FALSE	FALSE	FALSE	8	5	8	7	4	5	2	4	11	6	12	9	3	3	6	0	2	6	7	4	7	5	5	2
chr1	98790000	98800000	10001	*	chr1	99070000	99080000	10001	*	TRUE	FALSE	FALSE	FALSE	2.82012	loop_1005	290000	3.45833	9	-1.12523	-1.13199	-0.00676694	0.129803	FALSE	FALSE	FALSE	7	9	5	7	3	7	3	1	5	1	1	6	3	1	2	2	3	2	0	3	4	2	2	4
chr1	98790000	98800000	10001	*	chr1	99170000	99180000	10001	*	TRUE	FALSE	FALSE	TRUE	3.78594	loop_1006	390000	4.58333	10	-0.594774	-0.181731	0.413043	0.626118	FALSE	FALSE	FALSE	10	9	10	8	2	3	0	2	5	7	8	4	1	3	1	2	5	2	3	1	7	3	9	5
chr1	98790000	98800000	10001	*	chr1	99480000	99490000	10001	*	TRUE	TRUE	TRUE	TRUE	4.69235	loop_1007	700000	4.29167	11	-0.348663	-0.318692	0.0299717	0.832422	FALSE	FALSE	FALSE	8	6	11	8	3	0	2	2	9	8	6	4	2	3	0	2	5	0	2	2	5	6	5	4
chr1	98800000	98810000	10001	*	chr1	99710000	99720000	10001	*	TRUE	TRUE	TRUE	TRUE	4.75589	loop_1008	920000	2	7	-0.315656	0.593505	0.909161	0.638451	FALSE	FALSE	FALSE	7	3	3	0	0	0	1	1	1	2	5	2	0	1	1	1	0	4	1	2	3	3	4	3
chr1	98800000	98810000	10001	*	chr1	99140000	99150000	10001	*	FALSE	FALSE	TRUE	FALSE	3.00226	loop_1009	350000	3.08333	10	-0.603122	0.153517	0.756639	0.592824	FALSE	FALSE	FALSE	4	2	3	10	1	3	2	1	4	2	4	1	2	2	2	1	2	1	2	4	8	6	4	3
chr1	98890000	98900000	10001	*	chr1	98970000	98980000	10001	*	FALSE	TRUE	FALSE	FALSE	2.18115	loop_1010	90000	6	11	0.464596	-0.020055	-0.484651	0.56664	FALSE	FALSE	FALSE	9	4	10	7	4	4	2	2	8	11	9	9	7	1	6	10	6	3	5	4	4	7	5	7
chr1	98980000	98990000	10001	*	chr1	99700000	99710000	10001	*	FALSE	FALSE	TRUE	TRUE	3.61409	loop_1011	730000	2.04167	5	0.275026	1.13403	0.859006	0.427831	FALSE	FALSE	FALSE	1	4	2	2	1	1	0	0	1	4	0	4	2	1	1	1	0	3	3	1	5	3	4	5
chr1	98990000	99000000	10001	*	chr1	99470000	99480000	10001	*	FALSE	FALSE	TRUE	TRUE	3.00069	loop_1012	490000	2.75	7	-0.625744	-0.054444	0.5713	0.712776	FALSE	FALSE	FALSE	2	7	5	5	0	3	2	1	7	3	1	2	3	2	0	0	2	4	2	1	4	4	1	5
chr1	99180000	99190000	10001	*	chr1	99480000	99490000	10001	*	TRUE	TRUE	TRUE	TRUE	7.07677	loop_1013	310000	11.7917	26	-0.479132	-0.363861	0.115271	0.416458	FALSE	FALSE	FALSE	26	21	16	21	1	11	5	12	15	12	11	14	8	6	9	9	8	10	7	8	19	16	6	12
chr1	99180000	99190000	10001	*	chr1	99700000	99710000	10001	*	TRUE	TRUE	TRUE	TRUE	8.89702	loop_1014	530000	8.04167	14	0.266859	0.546717	0.279857	0.509227	FALSE	FALSE	FALSE	12	11	8	12	0	2	5	3	13	13	8	11	6	3	8	5	8	10	8	3	14	8	11	11
chr1	99310000	99320000	10001	*	chr1	99710000	99720000	10001	*	FALSE	FALSE	TRUE	FALSE	3.3609	loop_1015	410000	3.625	10	0.372195	1.01399	0.641793	0.344965	FALSE	FALSE	FALSE	2	4	1	3	0	3	2	4	6	3	1	10	2	3	1	1	4	1	4	2	7	9	8	6
chr1	99320000	99330000	10001	*	chr1	99480000	99490000	10001	*	FALSE	FALSE	TRUE	TRUE	2.60283	loop_1016	170000	6.04167	12	0.0269861	-0.148524	-0.17551	0.944962	FALSE	FALSE	FALSE	8	7	10	4	10	2	3	3	7	5	12	12	2	6	6	2	2	2	5	3	11	9	9	5
chr1	99480000	99490000	10001	*	chr1	99700000	99710000	10001	*	TRUE	TRUE	TRUE	TRUE	4.40658	loop_1017	230000	8.70833	17	0.0884384	0.247628	0.159189	0.858199	FALSE	FALSE	FALSE	11	15	13	9	3	2	4	6	17	10	14	4	10	5	8	4	9	5	5	8	10	13	13	11
chr1	99500000	99510000	10001	*	chr1	99640000	99650000	10001	*	FALSE	FALSE	TRUE	FALSE	2.30684	loop_1018	150000	5.58333	15	-0.100129	0.1963	0.29643	0.862518	FALSE	FALSE	FALSE	7	6	7	10	5	5	0	2	8	5	7	5	5	4	3	4	2	3	4	7	9	8	3	15
chr1	99560000	99570000	10001	*	chr1	99680000	99690000	10001	*	TRUE	FALSE	FALSE	FALSE	2.99119	loop_1019	130000	5.20833	10	-0.589528	-0.801839	-0.212311	0.312277	FALSE	FALSE	FALSE	10	10	7	7	1	7	7	5	3	8	8	4	3	6	5	2	2	1	7	3	5	3	4	7
chr1	99800000	99810000	10001	*	chr1	100030000	100040000	10001	*	TRUE	TRUE	TRUE	TRUE	3.87161	loop_1020	240000	7.16667	15	-0.282298	-0.261472	0.0208254	0.819115	FALSE	FALSE	FALSE	10	8	12	13	4	1	9	6	15	9	12	8	1	4	4	4	2	3	9	3	13	8	5	9
chr1	99800000	99810000	10001	*	chr1	100130000	100140000	10001	*	TRUE	TRUE	FALSE	TRUE	2.94764	loop_1021	340000	5.25	16	0.647938	0.669892	0.0219549	0.462048	FALSE	FALSE	FALSE	6	5	1	6	2	4	2	3	11	5	9	8	4	4	2	6	4	3	3	9	16	4	6	3
chr1	99800000	99810000	10001	*	chr1	100450000	100460000	10001	*	TRUE	TRUE	TRUE	TRUE	5.52426	loop_1022	660000	4.54167	10	0.687957	0.564137	-0.123819	0.505474	FALSE	FALSE	FALSE	7	3	3	5	1	1	4	2	10	8	5	8	3	3	2	6	8	1	4	4	6	4	4	7
chr1	99800000	99810000	10001	*	chr1	100870000	100880000	10001	*	TRUE	TRUE	TRUE	TRUE	5.86876	loop_1023	1080000	2.58333	13	0.873878	1.24133	0.367447	0.365421	FALSE	FALSE	FALSE	3	2	1	1	1	2	1	0	3	3	1	3	4	2	2	3	0	3	2	4	13	6	2	0
chr1	99810000	99820000	10001	*	chr1	100270000	100280000	10001	*	FALSE	FALSE	TRUE	TRUE	3.1862	loop_1024	470000	3.41667	8	0.316737	0.263288	-0.0534483	0.90062	FALSE	FALSE	FALSE	5	2	7	1	1	4	1	2	7	1	3	5	8	3	2	2	2	4	3	5	5	1	4	4
chr1	99850000	99860000	10001	*	chr1	100030000	100040000	10001	*	TRUE	FALSE	TRUE	TRUE	2.36039	loop_1025	190000	5.45833	13	0.141205	0.366921	0.225716	0.817638	FALSE	FALSE	FALSE	8	5	7	4	2	6	3	1	3	4	6	6	7	10	2	4	3	1	6	4	7	12	7	13
chr1	100120000	100130000	10001	*	chr1	100880000	100890000	10001	*	FALSE	TRUE	FALSE	FALSE	2.85347	loop_1026	770000	1.45833	5	0.991935	0.351767	-0.640168	0.644703	FALSE	FALSE	FALSE	2	1	0	2	2	0	1	0	1	5	2	3	1	3	1	1	1	2	0	3	2	0	1	1
chr1	100160000	100170000	10001	*	chr1	100430000	100440000	10001	*	FALSE	TRUE	FALSE	FALSE	2.08858	loop_1027	280000	3	9	0.536771	0.353904	-0.182867	0.787369	FALSE	FALSE	FALSE	2	2	5	3	1	2	1	2	3	5	5	4	3	2	4	2	4	3	0	0	9	0	4	6
chr1	100270000	100280000	10001	*	chr1	100450000	100460000	10001	*	TRUE	FALSE	TRUE	TRUE	3.32153	loop_1028	190000	5.625	9	0.329115	0.490455	0.161341	0.664181	FALSE	FALSE	FALSE	9	7	6	5	2	1	3	3	8	9	7	4	5	6	5	4	7	5	3	5	9	9	7	6
chr1	100270000	100280000	10001	*	chr1	100870000	100880000	10001	*	TRUE	TRUE	TRUE	TRUE	3.73016	loop_1029	610000	2.95833	7	0.874958	1.21457	0.339607	0.31921	FALSE	FALSE	FALSE	0	3	4	0	0	3	1	2	6	3	7	3	4	1	3	0	3	0	6	5	5	3	7	2
chr1	100460000	100470000	10001	*	chr1	100860000	100870000	10001	*	TRUE	TRUE	TRUE	TRUE	9.19463	loop_1030	410000	15	26	0.138678	0.32024	0.181562	0.647042	FALSE	FALSE	FALSE	19	26	20	22	6	9	3	4	22	24	21	20	9	9	10	11	16	7	16	16	18	19	15	18
chr1	100600000	100610000	10001	*	chr1	100860000	100870000	10001	*	TRUE	TRUE	TRUE	TRUE	7.2228	loop_1031	270000	11.7917	26	0.271241	-0.379392	-0.650633	0.251549	FALSE	FALSE	FALSE	15	19	25	19	1	8	5	4	26	16	24	16	14	9	9	6	7	6	8	7	7	13	11	8
chr1	100670000	100680000	10001	*	chr1	100860000	100870000	10001	*	FALSE	FALSE	FALSE	TRUE	2.63088	loop_1032	200000	4.33333	15	1.04163	0.182325	-0.859309	0.162669	FALSE	FALSE	FALSE	3	7	3	5	2	2	2	0	15	7	11	4	5	3	4	5	6	1	3	3	3	4	3	3
chr1	100920000	100930000	10001	*	chr1	101230000	101240000	10001	*	TRUE	FALSE	FALSE	TRUE	5.40002	loop_1033	320000	8.375	16	-0.160344	-0.310116	-0.149772	0.787356	FALSE	FALSE	FALSE	13	16	9	13	7	5	6	4	11	14	12	8	9	5	6	5	7	4	7	7	6	8	8	11
chr1	100920000	100930000	10001	*	chr1	101280000	101290000	10001	*	TRUE	TRUE	TRUE	TRUE	9.14497	loop_1034	370000	12.5	23	-0.155343	-0.0486738	0.106669	0.911391	FALSE	FALSE	FALSE	23	17	18	14	6	13	5	7	21	14	16	23	9	10	5	3	10	6	12	12	16	14	11	15
chr1	100920000	100930000	10001	*	chr1	101350000	101360000	10001	*	FALSE	FALSE	FALSE	TRUE	5.33095	loop_1035	440000	3.45833	9	0.399121	-0.658585	-1.05771	0.361334	FALSE	FALSE	FALSE	1	6	5	9	0	2	3	1	9	5	4	5	8	2	2	3	1	2	1	0	5	2	3	4
chr1	100930000	100940000	10001	*	chr1	101020000	101030000	10001	*	TRUE	TRUE	FALSE	FALSE	2.40047	loop_1036	100000	6.25	11	-0.0724749	-0.354329	-0.281854	0.788447	FALSE	FALSE	FALSE	10	9	11	7	4	4	8	1	8	11	8	11	3	2	8	4	7	6	4	1	4	6	9	4
chr1	101020000	101030000	10001	*	chr1	101230000	101240000	10001	*	TRUE	TRUE	FALSE	TRUE	3.09181	loop_1037	220000	6.66667	14	-0.106754	-1.11715	-1.0104	0.0529266	FALSE	FALSE	FALSE	8	10	14	10	4	9	5	5	9	13	10	11	7	4	7	4	4	2	4	3	1	7	4	5
chr1	101310000	101320000	10001	*	chr1	101350000	101360000	10001	*	TRUE	TRUE	FALSE	TRUE	2.73486	loop_1038	50000	15.0833	26	-0.0371171	-0.129287	-0.0921702	0.925135	FALSE	FALSE	FALSE	18	26	17	13	10	12	16	9	14	20	20	20	13	18	10	11	13	16	10	9	23	16	13	15
chr1	101310000	101320000	10001	*	chr1	101430000	101440000	10001	*	FALSE	FALSE	FALSE	TRUE	2.58416	loop_1039	130000	6.33333	20	-0.630223	-0.677074	-0.0468515	0.358846	FALSE	FALSE	FALSE	3	10	20	6	12	7	5	2	5	7	6	10	5	4	6	2	3	2	5	7	6	7	5	7
chr1	101520000	101530000	10001	*	chr1	102970000	102980000	10001	*	FALSE	TRUE	TRUE	FALSE	2.96618	loop_1040	1460000	1.125	4	1.26368	0.780914	-0.48277	0.596388	FALSE	FALSE	FALSE	1	0	2	1	1	0	0	0	2	1	3	3	2	1	1	0	1	2	0	0	4	0	1	1
chr1	101520000	101530000	10001	*	chr1	102430000	102440000	10001	*	TRUE	FALSE	TRUE	TRUE	3.15028	loop_1041	920000	1.75	7	-0.178026	0.422362	0.600388	0.842869	FALSE	FALSE	FALSE	3	3	1	3	1	2	0	0	1	1	7	2	0	0	1	1	3	3	0	0	1	4	3	2
chr1	101650000	101660000	10001	*	chr1	102960000	102970000	10001	*	FALSE	TRUE	FALSE	TRUE	3.15198	loop_1042	1320000	1.125	5	0.012246	-0.612541	-0.624786	0.881237	FALSE	FALSE	FALSE	5	2	3	1	0	0	0	0	2	3	0	1	1	1	2	0	1	0	0	0	1	0	2	2
chr1	101650000	101660000	10001	*	chr1	101960000	101970000	10001	*	FALSE	FALSE	FALSE	TRUE	2.21373	loop_1043	320000	2.625	8	0.0469931	-0.494781	-0.541774	0.792141	FALSE	FALSE	FALSE	7	2	6	4	0	1	2	1	8	5	4	4	2	1	2	0	2	3	1	0	2	2	3	1
chr1	101650000	101660000	10001	*	chr1	102190000	102200000	10001	*	TRUE	TRUE	FALSE	TRUE	4.12152	loop_1044	550000	2.75	5	-0.603839	-0.118855	0.484985	0.739862	FALSE	FALSE	FALSE	5	5	5	5	1	3	0	1	0	4	3	1	2	2	3	2	3	0	2	2	5	2	5	5
chr1	101650000	101660000	10001	*	chr1	102420000	102430000	10001	*	TRUE	FALSE	FALSE	TRUE	3.14959	loop_1045	780000	1.45833	6	-0.11388	-0.0253836	0.0884964	0.995222	FALSE	FALSE	FALSE	1	0	1	6	1	1	1	0	2	2	1	1	4	0	0	1	0	0	2	0	6	1	2	2
chr1	101760000	101770000	10001	*	chr1	102170000	102180000	10001	*	FALSE	FALSE	TRUE	FALSE	2.6445	loop_1046	420000	1.45833	7	-1.3025	1.65593	2.95843	0.0199399	TRUE	TRUE	TRUE	3	0	3	1	0	0	0	1	0	1	1	0	0	1	0	0	0	7	3	1	6	3	2	2
chr1	101830000	101840000	10001	*	chr1	102410000	102420000	10001	*	TRUE	FALSE	FALSE	TRUE	2.63538	loop_1047	590000	1.16667	3	-1.3491	-0.953154	0.395942	0.507788	FALSE	FALSE	FALSE	2	3	2	2	2	0	0	3	0	2	0	1	0	0	1	2	1	0	0	1	0	2	3	1
chr1	101990000	102000000	10001	*	chr1	102170000	102180000	10001	*	FALSE	FALSE	TRUE	FALSE	2.61503	loop_1048	190000	3	7	-0.844024	0.515688	1.35971	0.193059	FALSE	FALSE	FALSE	5	2	5	5	1	2	2	1	4	0	2	1	3	0	2	2	4	3	3	1	7	6	7	4
chr1	102550000	102560000	10001	*	chr1	102960000	102970000	10001	*	TRUE	TRUE	TRUE	TRUE	3.34385	loop_1049	420000	3.375	10	-0.511051	0.661268	1.17232	0.237628	FALSE	FALSE	FALSE	3	8	4	3	3	1	1	2	3	5	1	4	2	2	1	1	3	10	1	5	5	3	6	4
chr1	102570000	102580000	10001	*	chr1	103450000	103460000	10001	*	FALSE	FALSE	FALSE	TRUE	2.96447	loop_1050	890000	1.20833	4	-1.26477	-0.617923	0.646845	0.595381	FALSE	FALSE	FALSE	4	4	2	2	0	0	2	0	1	1	0	2	1	0	1	0	1	1	0	0	3	0	1	3
chr1	103100000	103110000	10001	*	chr1	103460000	103470000	10001	*	TRUE	TRUE	TRUE	TRUE	3.85744	loop_1051	370000	4.66667	10	-0.429452	-0.0428622	0.38659	0.741847	FALSE	FALSE	FALSE	10	9	5	5	2	4	3	3	6	4	5	3	4	5	2	3	2	3	6	7	5	5	7	4
chr1	103790000	103800000	10001	*	chr1	104120000	104130000	10001	*	TRUE	TRUE	TRUE	TRUE	4.86568	loop_1052	340000	1.91667	6	-0.0622472	-0.690439	-0.628192	0.767498	FALSE	FALSE	FALSE	3	3	6	3	1	1	1	0	5	1	3	1	1	2	0	4	0	0	3	0	1	3	2	2
chr1	103790000	103800000	10001	*	chr1	104250000	104260000	10001	*	FALSE	FALSE	TRUE	FALSE	5.59829	loop_1053	470000	1.625	7	0.193101	1.69285	1.49975	0.194989	FALSE	FALSE	FALSE	1	2	0	3	0	0	1	0	4	1	2	1	0	0	1	0	3	1	0	2	7	4	2	4
chr1	103790000	103800000	10001	*	chr1	104620000	104630000	10001	*	TRUE	FALSE	FALSE	FALSE	4.67698	loop_1054	840000	1	3	-1.45261	-1.29105	0.161568	0.43763	FALSE	FALSE	FALSE	2	2	2	3	0	1	1	2	2	1	1	0	0	0	0	1	0	0	0	0	2	2	0	2
chr1	103810000	103820000	10001	*	chr1	103900000	103910000	10001	*	TRUE	FALSE	TRUE	FALSE	2.67445	loop_1055	100000	2.91667	9	-0.454991	-0.00435071	0.45064	0.80825	FALSE	FALSE	FALSE	6	5	9	3	0	2	1	1	4	5	2	3	3	0	1	2	3	3	2	3	2	5	5	0
chr1	103940000	103950000	10001	*	chr1	104260000	104270000	10001	*	FALSE	FALSE	TRUE	TRUE	2.35695	loop_1056	330000	2.66667	8	-0.219173	0.913034	1.13221	0.313847	FALSE	FALSE	FALSE	3	5	5	1	0	1	2	0	6	2	1	3	2	1	0	1	4	1	3	2	5	3	5	8
chr1	103950000	103960000	10001	*	chr1	104130000	104140000	10001	*	TRUE	FALSE	FALSE	TRUE	2.90569	loop_1057	190000	4.125	12	-0.73831	-0.425956	0.312354	0.504834	FALSE	FALSE	FALSE	8	5	8	12	3	3	1	2	4	2	6	4	3	4	2	1	3	1	1	4	6	6	5	5
chr1	104780000	104790000	10001	*	chr1	105790000	105800000	10001	*	TRUE	TRUE	TRUE	TRUE	6.45222	loop_1058	1020000	4.58333	10	-0.785983	-0.0846207	0.701362	0.401389	FALSE	FALSE	FALSE	7	7	10	6	4	2	5	2	6	7	4	6	0	0	4	1	3	5	2	5	10	8	2	4
chr1	106020000	106030000	10001	*	chr1	106260000	106270000	10001	*	TRUE	FALSE	FALSE	TRUE	2.86461	loop_1059	250000	3.29167	9	-1.53701	0.175971	1.71298	0.0456752	FALSE	FALSE	FALSE	4	3	7	5	2	3	3	3	2	1	2	1	0	2	2	1	2	3	0	5	9	6	6	7
chr1	106020000	106030000	10001	*	chr1	106630000	106640000	10001	*	FALSE	FALSE	FALSE	TRUE	2.46692	loop_1060	620000	1.70833	6	-1.03575	-0.0130878	1.02266	0.561162	FALSE	FALSE	FALSE	2	6	3	4	0	1	1	0	0	3	3	0	0	0	2	1	2	0	1	1	3	3	4	1
chr1	106020000	106030000	10001	*	chr1	107150000	107160000	10001	*	TRUE	TRUE	TRUE	TRUE	4.14054	loop_1061	1140000	2.95833	7	-1.30853	0.345446	1.65398	0.0861978	FALSE	FALSE	FALSE	6	6	5	3	1	2	3	1	4	2	3	1	1	0	1	0	2	3	3	4	3	7	4	6
chr1	106790000	106800000	10001	*	chr1	107140000	107150000	10001	*	TRUE	FALSE	FALSE	FALSE	3.08777	loop_1062	360000	2.54167	11	-1.41089	-0.522775	0.888112	0.313061	FALSE	FALSE	FALSE	5	6	4	5	0	2	4	1	1	2	0	1	4	0	0	3	2	1	2	0	3	1	3	11
chr1	107270000	107280000	10001	*	chr1	107520000	107530000	10001	*	TRUE	FALSE	FALSE	TRUE	3.83976	loop_1063	260000	5	13	-0.91909	-0.736118	0.182972	0.207069	FALSE	FALSE	FALSE	13	8	7	9	6	5	4	3	4	11	5	4	3	2	1	2	3	1	6	1	5	4	6	7
chr1	107270000	107280000	10001	*	chr1	107750000	107760000	10001	*	TRUE	TRUE	FALSE	TRUE	5.97099	loop_1064	490000	6.04167	17	-0.522649	-0.0885731	0.434076	0.601533	FALSE	FALSE	FALSE	9	9	8	17	3	4	4	1	4	9	7	7	4	1	3	5	3	6	3	4	8	4	12	10
chr1	107430000	107440000	10001	*	chr1	107740000	107750000	10001	*	TRUE	TRUE	TRUE	TRUE	7.04177	loop_1065	320000	10	19	-0.132282	0.00161592	0.133898	0.935889	FALSE	FALSE	FALSE	19	17	11	19	4	4	3	6	14	7	15	14	4	10	8	6	12	5	7	8	17	9	9	12
chr1	107530000	107540000	10001	*	chr1	107740000	107750000	10001	*	TRUE	TRUE	FALSE	TRUE	4.24895	loop_1066	220000	8.45833	16	-0.55802	-0.213916	0.344104	0.43269	FALSE	FALSE	FALSE	13	15	11	16	5	6	6	7	9	7	8	10	4	5	8	6	9	6	10	6	9	10	10	7
chr1	107570000	107580000	10001	*	chr1	107740000	107750000	10001	*	FALSE	FALSE	FALSE	TRUE	2.95734	loop_1067	180000	6.41667	12	0.074432	0.0698821	-0.00454988	0.986555	FALSE	FALSE	FALSE	10	9	7	12	3	2	2	4	7	11	10	10	6	4	4	3	3	6	6	2	11	8	10	4
chr1	107780000	107790000	10001	*	chr1	108120000	108130000	10001	*	TRUE	TRUE	TRUE	TRUE	11.6436	loop_1068	350000	20.7083	34	-0.140896	0.230513	0.371409	0.433902	FALSE	FALSE	FALSE	33	32	27	27	11	8	12	11	27	34	18	22	10	16	9	19	19	18	18	25	23	30	26	22
chr1	107800000	107810000	10001	*	chr1	107910000	107920000	10001	*	TRUE	FALSE	FALSE	FALSE	2.34602	loop_1069	120000	5.70833	13	-0.482221	-0.0579708	0.42425	0.653201	FALSE	FALSE	FALSE	8	9	10	13	2	3	3	3	10	4	6	6	2	2	5	3	1	5	3	5	7	12	5	10
chr1	108200000	108210000	10001	*	chr1	108510000	108520000	10001	*	FALSE	FALSE	FALSE	TRUE	6.19381	loop_1070	320000	2.66667	6	0.146037	0.0562095	-0.0898271	0.982572	FALSE	FALSE	FALSE	4	5	4	1	2	3	1	0	2	3	6	3	5	1	2	1	2	4	0	1	5	2	4	3
chr1	108510000	108520000	10001	*	chr1	108560000	108570000	10001	*	FALSE	FALSE	TRUE	FALSE	3.99597	loop_1071	60000	10.1667	18	-0.343786	0.387233	0.731019	0.198946	FALSE	FALSE	FALSE	18	13	5	15	10	3	7	6	10	11	11	15	7	1	4	7	8	6	11	13	18	14	18	13
chr1	108510000	108520000	10001	*	chr1	108640000	108650000	10001	*	TRUE	TRUE	TRUE	TRUE	6.28696	loop_1072	140000	10.375	20	0.60644	0.26487	-0.34157	0.303098	FALSE	FALSE	FALSE	12	14	10	12	6	4	3	4	19	20	14	9	9	11	15	8	10	6	9	5	9	11	13	16
chr1	108560000	108570000	10001	*	chr1	108640000	108650000	10001	*	FALSE	TRUE	FALSE	FALSE	2.79897	loop_1073	90000	7.45833	17	0.0485919	0.0517698	0.00317791	0.993471	FALSE	FALSE	FALSE	11	9	4	12	3	8	3	6	11	15	14	6	2	4	7	5	7	8	5	3	17	4	9	6
chr1	108690000	108700000	10001	*	chr1	108740000	108750000	10001	*	FALSE	FALSE	FALSE	TRUE	2.27049	loop_1074	60000	10.25	18	-0.0413641	-0.300835	-0.259471	0.737162	FALSE	FALSE	FALSE	14	14	11	14	8	10	8	6	11	16	18	15	11	4	7	8	10	7	6	6	12	5	12	13
chr1	108690000	108700000	10001	*	chr1	108890000	108900000	10001	*	FALSE	TRUE	TRUE	TRUE	4.10486	loop_1075	210000	5.79167	13	0.47015	0.661451	0.1913	0.483419	FALSE	FALSE	FALSE	4	5	3	4	7	3	3	4	10	10	13	8	3	1	3	4	6	8	3	6	9	8	4	10
chr1	108820000	108830000	10001	*	chr1	108890000	108900000	10001	*	TRUE	TRUE	TRUE	TRUE	5.85661	loop_1076	80000	17.4167	35	0.155823	-0.657864	-0.813687	0.0172774	FALSE	TRUE	TRUE	28	35	19	21	8	16	10	11	34	30	26	34	11	14	15	13	12	7	7	6	20	17	12	12
chr1	109200000	109210000	10001	*	chr1	109260000	109270000	10001	*	FALSE	FALSE	FALSE	TRUE	2.08898	loop_1077	70000	6.66667	16	0.0908281	0.162918	0.07209	0.952345	FALSE	FALSE	FALSE	10	7	2	9	5	5	6	4	16	2	9	12	6	4	4	4	7	7	3	6	8	7	11	6
chr1	109270000	109280000	10001	*	chr1	109390000	109400000	10001	*	TRUE	TRUE	TRUE	TRUE	6.55417	loop_1078	130000	14.375	27	0.182349	-0.216183	-0.398531	0.505277	FALSE	FALSE	FALSE	16	15	17	13	13	11	12	12	19	27	15	22	14	12	14	11	10	9	9	8	19	7	21	19
chr1	109420000	109430000	10001	*	chr1	109480000	109490000	10001	*	FALSE	FALSE	FALSE	TRUE	1.98726	loop_1079	70000	6.58333	12	0.292795	-0.288253	-0.581048	0.519081	FALSE	FALSE	FALSE	7	7	8	7	4	7	3	6	8	8	8	4	11	10	12	3	1	5	3	7	8	6	5	10
chr1	109490000	109500000	10001	*	chr1	109530000	109540000	10001	*	TRUE	FALSE	TRUE	FALSE	3.15732	loop_1080	50000	17.5	31	-0.0289957	-0.493397	-0.464401	0.234294	FALSE	FALSE	FALSE	21	20	14	22	16	16	15	25	25	31	28	21	13	16	13	13	10	13	13	17	11	10	14	23
chr1	109540000	109550000	10001	*	chr1	109620000	109630000	10001	*	TRUE	FALSE	FALSE	TRUE	6.10535	loop_1081	90000	12.2083	24	0.104128	-0.476518	-0.580645	0.248167	FALSE	FALSE	FALSE	13	10	12	12	12	13	15	11	24	21	15	16	9	10	10	10	6	4	7	5	16	14	14	14
chr1	109540000	109550000	10001	*	chr1	109770000	109780000	10001	*	TRUE	TRUE	TRUE	TRUE	5.66189	loop_1082	240000	6.875	12	0.00832531	-0.1354	-0.143725	0.948481	FALSE	FALSE	FALSE	9	5	7	7	8	7	8	2	10	9	12	5	3	4	8	7	5	5	4	2	11	10	9	8
chr1	109540000	109550000	10001	*	chr1	109980000	109990000	10001	*	FALSE	TRUE	FALSE	TRUE	3.66375	loop_1083	450000	4.5	9	0.0305516	-0.207172	-0.237723	0.924292	FALSE	FALSE	FALSE	9	5	3	6	5	2	1	5	9	5	5	6	3	3	0	8	4	1	2	2	9	6	8	1
chr1	109640000	109650000	10001	*	chr1	109770000	109780000	10001	*	TRUE	TRUE	TRUE	TRUE	9.4734	loop_1084	140000	12.9583	25	0.331696	0.196974	-0.134722	0.666828	FALSE	FALSE	FALSE	10	11	10	9	11	13	11	10	21	19	25	19	9	8	14	5	10	6	11	13	24	10	15	17
chr1	109640000	109650000	10001	*	chr1	109980000	109990000	10001	*	TRUE	TRUE	TRUE	TRUE	5.31868	loop_1085	350000	5.41667	12	0.260649	0.346606	0.0859573	0.829197	FALSE	FALSE	FALSE	3	2	9	3	4	4	5	5	3	5	12	12	3	5	2	4	4	1	4	6	11	8	6	9
chr1	109770000	109780000	10001	*	chr1	109910000	109920000	10001	*	TRUE	TRUE	FALSE	TRUE	3.83445	loop_1086	150000	8	18	0.263681	-0.0142968	-0.277978	0.779283	FALSE	FALSE	FALSE	8	11	8	7	6	5	5	7	18	9	13	7	6	5	11	6	7	4	4	7	9	10	10	9
chr1	109770000	109780000	10001	*	chr1	109980000	109990000	10001	*	TRUE	TRUE	TRUE	TRUE	12.5833	loop_1087	220000	21.3333	36	0.280805	0.552511	0.271706	0.146642	FALSE	FALSE	FALSE	22	20	17	23	17	18	5	12	32	36	26	27	12	18	21	7	27	19	23	16	28	27	33	26
chr1	109920000	109930000	10001	*	chr1	109980000	109990000	10001	*	TRUE	TRUE	FALSE	TRUE	2.98247	loop_1088	70000	8.58333	16	-0.472703	-1.21242	-0.739715	0.0120718	FALSE	TRUE	TRUE	16	11	11	13	10	12	7	11	15	10	9	12	8	6	9	3	5	6	3	2	13	4	7	3
chr1	110060000	110070000	10001	*	chr1	110110000	110120000	10001	*	TRUE	TRUE	FALSE	FALSE	2.86096	loop_1089	60000	5.79167	10	0.163083	-0.102952	-0.266036	0.883202	FALSE	FALSE	FALSE	8	5	6	4	6	6	6	2	8	7	7	9	7	7	4	3	3	1	4	7	2	9	10	8
chr1	110200000	110210000	10001	*	chr1	110310000	110320000	10001	*	TRUE	TRUE	TRUE	TRUE	11.5665	loop_1090	120000	25.3333	40	-0.211556	-0.246879	-0.0353231	0.583627	FALSE	FALSE	FALSE	33	32	28	31	21	26	18	25	34	33	28	37	19	16	24	10	15	22	12	17	31	24	32	40
chr1	110200000	110210000	10001	*	chr1	110460000	110470000	10001	*	TRUE	TRUE	TRUE	TRUE	6.04312	loop_1091	270000	10.0833	19	0.145805	0.177089	0.0312839	0.90276	FALSE	FALSE	FALSE	10	15	9	13	6	8	4	6	15	11	9	11	14	9	7	8	7	4	13	4	19	14	12	14
chr1	110310000	110320000	10001	*	chr1	110460000	110470000	10001	*	TRUE	TRUE	TRUE	TRUE	3.12	loop_1092	160000	6.83333	12	0.00565719	0.127236	0.121579	0.95988	FALSE	FALSE	FALSE	11	11	6	5	5	1	9	3	11	9	4	10	5	4	8	4	6	5	7	4	11	5	8	12
chr1	110340000	110350000	10001	*	chr1	110390000	110400000	10001	*	FALSE	TRUE	FALSE	TRUE	2.44549	loop_1093	60000	8.54167	18	-0.152425	0.00532791	0.157753	0.930478	FALSE	FALSE	FALSE	8	13	8	16	11	3	4	4	15	13	13	9	5	2	5	5	7	3	4	5	18	12	15	7
chr1	110410000	110420000	10001	*	chr1	110460000	110470000	10001	*	TRUE	TRUE	FALSE	TRUE	3.5519	loop_1094	60000	15.0417	25	-0.0159791	-0.327504	-0.311525	0.564675	FALSE	FALSE	FALSE	17	17	16	21	11	18	10	14	18	20	17	25	10	15	13	14	19	7	8	8	21	15	15	12
chr1	110520000	110530000	10001	*	chr1	110610000	110620000	10001	*	TRUE	TRUE	FALSE	TRUE	3.74505	loop_1095	100000	11.5	22	0.151001	0.172036	0.0210353	0.888181	FALSE	FALSE	FALSE	14	11	16	8	7	7	6	13	22	13	15	13	11	10	7	8	9	10	9	13	11	15	14	14
chr1	110520000	110530000	10001	*	chr1	110770000	110780000	10001	*	FALSE	FALSE	TRUE	TRUE	3.7081	loop_1096	260000	4.91667	11	0.0152236	0.128968	0.113744	0.970505	FALSE	FALSE	FALSE	6	3	6	6	3	3	3	6	8	5	6	5	3	4	4	4	2	4	7	2	6	2	11	9
chr1	110610000	110620000	10001	*	chr1	110990000	111000000	10001	*	FALSE	TRUE	FALSE	FALSE	3.21009	loop_1097	390000	2.125	8	1.29526	0.525559	-0.7697	0.38132	FALSE	FALSE	FALSE	0	2	3	1	1	1	1	1	7	4	8	3	0	0	3	2	0	1	2	2	0	6	1	2
chr1	110630000	110640000	10001	*	chr1	110770000	110780000	10001	*	TRUE	TRUE	TRUE	TRUE	5.58118	loop_1098	150000	10.875	19	0.384555	0.597716	0.213161	0.321791	FALSE	FALSE	FALSE	10	11	12	10	9	5	3	6	12	19	15	18	9	10	11	0	11	9	7	13	16	17	12	16
chr1	110820000	110830000	10001	*	chr1	110990000	111000000	10001	*	FALSE	FALSE	TRUE	TRUE	3.19155	loop_1099	180000	3.875	8	-0.142813	0.393718	0.536531	0.715766	FALSE	FALSE	FALSE	7	4	3	6	2	2	3	1	6	7	2	5	1	4	3	0	2	2	8	1	8	8	4	4
chr1	111030000	111040000	10001	*	chr1	111340000	111350000	10001	*	FALSE	FALSE	TRUE	TRUE	2.68193	loop_1100	320000	2.375	6	0.268373	0.260188	-0.00818507	0.936686	FALSE	FALSE	FALSE	3	3	3	2	1	1	2	1	2	3	6	3	1	1	2	3	2	0	2	2	4	4	2	4
chr1	111220000	111230000	10001	*	chr1	111330000	111340000	10001	*	TRUE	TRUE	TRUE	TRUE	5.36977	loop_1101	120000	11.4583	22	-0.171379	-0.0624804	0.108899	0.909321	FALSE	FALSE	FALSE	8	21	20	17	10	5	5	8	16	10	16	15	8	11	8	5	6	7	6	13	22	12	13	13
chr1	111220000	111230000	10001	*	chr1	111390000	111400000	10001	*	TRUE	TRUE	TRUE	TRUE	5.04921	loop_1102	180000	7.70833	13	0.376312	-0.397201	-0.773512	0.217137	FALSE	FALSE	FALSE	8	9	10	5	5	7	7	6	13	10	12	13	11	7	6	8	5	4	3	3	9	6	9	9
chr1	111480000	111490000	10001	*	chr1	111760000	111770000	10001	*	TRUE	TRUE	TRUE	TRUE	4.03293	loop_1103	290000	7.25	19	0.523135	-0.189703	-0.712838	0.269009	FALSE	FALSE	FALSE	6	12	7	6	4	4	5	6	10	19	14	9	5	8	6	7	3	3	1	8	9	10	5	7
chr1	111490000	111500000	10001	*	chr1	112350000	112360000	10001	*	FALSE	TRUE	FALSE	FALSE	3.20055	loop_1104	870000	1.125	3	1.15702	-0.154387	-1.3114	0.465193	FALSE	FALSE	FALSE	2	0	2	0	0	1	0	1	2	3	1	3	3	1	0	2	2	0	0	0	1	2	0	1
chr1	111500000	111510000	10001	*	chr1	111650000	111660000	10001	*	TRUE	TRUE	TRUE	TRUE	5.61396	loop_1105	160000	13.4167	25	0.272762	-0.0122646	-0.285027	0.678336	FALSE	FALSE	FALSE	16	19	22	17	3	7	8	6	25	21	18	16	14	10	10	11	12	6	4	7	15	12	24	19
chr1	111650000	111660000	10001	*	chr1	111740000	111750000	10001	*	FALSE	TRUE	FALSE	FALSE	3.13848	loop_1106	100000	5.16667	12	0.378093	-0.0449002	-0.422993	0.727429	FALSE	FALSE	FALSE	5	5	7	9	3	3	0	4	9	8	9	6	4	9	4	1	2	1	2	3	12	5	6	7
chr1	111710000	111720000	10001	*	chr1	111740000	111750000	10001	*	TRUE	TRUE	FALSE	TRUE	3.39968	loop_1107	40000	20.0833	41	0.385627	-0.213368	-0.598995	0.0853492	FALSE	FALSE	FALSE	29	24	17	22	13	12	13	15	30	32	39	41	11	14	20	20	10	7	14	13	26	20	19	21
chr1	112110000	112120000	10001	*	chr1	112290000	112300000	10001	*	FALSE	TRUE	FALSE	FALSE	3.15577	loop_1108	190000	2.125	8	1.0328	0.413025	-0.619774	0.52164	FALSE	FALSE	FALSE	2	5	0	3	0	2	0	0	8	6	0	4	2	2	2	1	0	2	1	1	2	2	3	3
chr1	112110000	112120000	10001	*	chr1	112330000	112340000	10001	*	FALSE	FALSE	TRUE	FALSE	3.11022	loop_1109	230000	4.66667	12	0.140109	0.543078	0.402969	0.631208	FALSE	FALSE	FALSE	5	6	5	4	3	3	2	2	7	8	5	3	5	2	4	2	2	4	3	6	12	6	7	6
chr1	112390000	112400000	10001	*	chr1	112460000	112470000	10001	*	TRUE	TRUE	TRUE	TRUE	5.20724	loop_1110	80000	16.2917	30	0.272401	0.199018	-0.0733828	0.711563	FALSE	FALSE	FALSE	9	20	16	23	7	13	5	19	22	30	22	24	13	12	10	13	19	12	8	8	26	21	21	18
chr1	112390000	112400000	10001	*	chr1	112610000	112620000	10001	*	TRUE	TRUE	TRUE	TRUE	5.9862	loop_1111	230000	8.125	13	0.0104631	-0.0687704	-0.0792335	0.982967	FALSE	FALSE	FALSE	11	9	13	10	7	3	6	4	13	13	12	8	12	5	3	3	4	1	6	7	13	11	10	11
chr1	112390000	112400000	10001	*	chr1	112710000	112720000	10001	*	FALSE	TRUE	TRUE	TRUE	5.14953	loop_1112	330000	3.75	10	0.432483	-0.235468	-0.667951	0.587723	FALSE	FALSE	FALSE	5	4	4	4	2	2	3	2	10	3	5	6	3	5	3	3	0	1	1	1	7	6	4	6
chr1	112500000	112510000	10001	*	chr1	112610000	112620000	10001	*	FALSE	FALSE	FALSE	TRUE	2.4457	loop_1113	120000	7.125	13	-0.329726	-0.124181	0.205545	0.787356	FALSE	FALSE	FALSE	8	9	11	9	8	5	5	5	10	9	8	7	5	4	4	5	5	9	2	3	10	11	13	6
chr1	112500000	112510000	10001	*	chr1	112700000	112710000	10001	*	FALSE	FALSE	TRUE	FALSE	3.56102	loop_1114	210000	4.29167	14	0.747027	0.96044	0.213413	0.340792	FALSE	FALSE	FALSE	1	0	2	4	1	6	3	3	7	6	1	5	2	5	7	3	6	3	2	2	14	8	8	4
chr1	112610000	112620000	10001	*	chr1	112670000	112680000	10001	*	FALSE	FALSE	FALSE	TRUE	2.57036	loop_1115	70000	6.83333	13	-0.249017	0.318873	0.567889	0.510539	FALSE	FALSE	FALSE	8	6	8	6	4	7	6	5	11	9	7	4	3	5	4	3	2	3	10	6	13	12	9	13
chr1	112640000	112650000	10001	*	chr1	112670000	112680000	10001	*	FALSE	TRUE	FALSE	FALSE	2.60819	loop_1116	40000	9.45833	19	0.559645	0.688475	0.12883	0.240828	FALSE	FALSE	FALSE	14	6	9	6	3	8	3	4	19	14	15	10	9	7	4	7	10	8	5	5	15	15	17	14
chr1	112660000	112670000	10001	*	chr1	112700000	112710000	10001	*	FALSE	TRUE	FALSE	FALSE	2.48536	loop_1117	50000	8.41667	18	0.835352	0.599065	-0.236287	0.14669	FALSE	FALSE	FALSE	6	6	7	6	3	5	5	6	14	9	18	11	7	11	9	6	7	7	4	5	13	12	12	13
chr1	112710000	112720000	10001	*	chr1	112800000	112810000	10001	*	TRUE	TRUE	TRUE	TRUE	8.19582	loop_1118	100000	16.0417	27	-0.0011036	-0.175534	-0.174431	0.827234	FALSE	FALSE	FALSE	23	11	21	19	16	13	10	15	27	18	24	20	15	12	9	14	12	14	10	14	16	15	16	21
chr1	112710000	112720000	10001	*	chr1	113040000	113050000	10001	*	TRUE	TRUE	FALSE	TRUE	5.44606	loop_1119	340000	3.95833	11	-0.26138	-1.24517	-0.983791	0.220748	FALSE	FALSE	FALSE	6	7	4	9	1	7	0	7	4	11	10	3	2	5	0	2	0	1	2	1	4	1	3	5
chr1	112720000	112730000	10001	*	chr1	113070000	113080000	10001	*	FALSE	FALSE	TRUE	FALSE	5.34097	loop_1120	360000	2.83333	8	0.09107	0.965169	0.874099	0.349312	FALSE	FALSE	FALSE	3	1	1	1	3	2	3	2	4	1	3	4	3	2	2	0	7	4	4	1	4	2	3	8
chr1	112740000	112750000	10001	*	chr1	112790000	112800000	10001	*	FALSE	FALSE	FALSE	TRUE	2.64911	loop_1121	60000	8.75	17	0.518847	0.268247	-0.2506	0.484792	FALSE	FALSE	FALSE	12	8	7	10	6	4	7	1	17	14	10	14	8	7	9	6	4	5	7	5	14	10	12	13
chr1	112800000	112810000	10001	*	chr1	112860000	112870000	10001	*	TRUE	FALSE	FALSE	FALSE	2.69146	loop_1122	70000	6.20833	12	-0.632702	-0.444883	0.187818	0.431841	FALSE	FALSE	FALSE	11	9	6	9	7	4	6	7	6	9	10	3	5	2	5	2	2	3	4	4	9	6	12	8
chr1	112810000	112820000	10001	*	chr1	113040000	113050000	10001	*	TRUE	TRUE	TRUE	TRUE	3.86735	loop_1123	240000	5.33333	8	-0.139191	-0.40791	-0.268719	0.765833	FALSE	FALSE	FALSE	8	7	8	5	8	2	2	6	7	8	6	7	4	6	2	5	3	3	3	4	8	5	5	6
chr1	112880000	112890000	10001	*	chr1	113040000	113050000	10001	*	TRUE	TRUE	TRUE	TRUE	4.86663	loop_1124	170000	10.0417	19	0.209684	-0.0948597	-0.304544	0.754822	FALSE	FALSE	FALSE	18	12	11	8	5	6	7	8	14	18	19	12	11	8	4	8	4	5	6	11	8	15	11	12
chr1	112880000	112890000	10001	*	chr1	112950000	112960000	10001	*	TRUE	FALSE	TRUE	TRUE	2.64419	loop_1125	80000	9.5	24	0.328577	0.27371	-0.0548669	0.737686	FALSE	FALSE	FALSE	15	4	7	11	7	5	6	7	16	15	12	17	2	8	5	9	8	4	6	5	18	7	10	24
chr1	112950000	112960000	10001	*	chr1	113030000	113040000	10001	*	TRUE	FALSE	TRUE	TRUE	2.61049	loop_1126	90000	5.66667	15	-0.943707	-0.405717	0.537991	0.281506	FALSE	FALSE	FALSE	11	1	9	5	5	6	4	13	8	4	3	3	4	5	2	2	2	6	2	1	15	11	11	3
chr1	113140000	113150000	10001	*	chr1	113380000	113390000	10001	*	TRUE	TRUE	FALSE	TRUE	3.16062	loop_1127	250000	4.33333	12	0.457066	0.687728	0.230661	0.597895	FALSE	FALSE	FALSE	7	4	5	3	2	2	1	1	5	2	7	9	4	3	5	1	4	5	0	1	5	12	9	7
chr1	113140000	113150000	10001	*	chr1	113440000	113450000	10001	*	TRUE	TRUE	TRUE	TRUE	3.78579	loop_1128	310000	3.95833	9	0.456525	0.778523	0.321997	0.53488	FALSE	FALSE	FALSE	4	5	5	6	1	0	0	2	5	7	4	6	6	0	3	2	4	3	1	2	6	6	9	8
chr1	113140000	113150000	10001	*	chr1	113670000	113680000	10001	*	TRUE	TRUE	TRUE	TRUE	6.4994	loop_1129	540000	11.4167	24	0.0579206	0.0354951	-0.0224255	0.989829	FALSE	FALSE	FALSE	16	17	6	19	2	10	10	7	11	17	6	20	9	10	10	12	6	8	13	6	24	14	12	9
chr1	113150000	113160000	10001	*	chr1	113290000	113300000	10001	*	FALSE	FALSE	FALSE	TRUE	1.93305	loop_1130	150000	3.79167	11	1.09542	1.01613	-0.0792878	0.284115	FALSE	FALSE	FALSE	3	3	2	3	1	2	0	3	5	6	4	11	2	3	6	2	0	10	1	2	8	2	8	4
chr1	113220000	113230000	10001	*	chr1	113670000	113680000	10001	*	TRUE	FALSE	FALSE	FALSE	2.4937	loop_1131	460000	3.875	8	0.27793	-0.099137	-0.377067	0.831859	FALSE	FALSE	FALSE	3	5	3	8	1	2	3	4	7	5	8	3	3	5	2	4	5	1	3	3	2	4	5	4
chr1	113390000	113400000	10001	*	chr1	113670000	113680000	10001	*	TRUE	TRUE	TRUE	TRUE	3.32477	loop_1132	290000	4.375	13	-0.356139	0.119166	0.475305	0.765557	FALSE	FALSE	FALSE	9	5	6	6	2	3	2	2	6	1	5	7	2	2	3	3	4	2	1	1	4	13	9	7
chr1	113830000	113840000	10001	*	chr1	113900000	113910000	10001	*	TRUE	TRUE	TRUE	TRUE	3.01945	loop_1133	80000	9.91667	18	0.394329	-0.0564451	-0.450774	0.460206	FALSE	FALSE	FALSE	14	15	11	14	4	6	2	5	18	15	17	16	9	8	9	7	4	5	6	6	11	10	12	14
chr1	113830000	113840000	10001	*	chr1	114280000	114290000	10001	*	FALSE	FALSE	TRUE	TRUE	3.43606	loop_1134	460000	2.08333	5	-0.905839	0.562787	1.46863	0.281527	FALSE	FALSE	FALSE	1	4	2	2	1	3	1	2	0	0	2	3	0	2	0	2	2	3	3	0	5	4	3	5
chr1	113970000	113980000	10001	*	chr1	114560000	114570000	10001	*	TRUE	FALSE	FALSE	TRUE	3.27261	loop_1135	600000	1.58333	5	-0.036023	1.39088	1.4269	0.285304	FALSE	FALSE	FALSE	5	0	0	0	0	2	0	1	2	1	1	1	0	1	0	2	2	0	2	2	3	5	3	5
chr1	113980000	113990000	10001	*	chr1	114280000	114290000	10001	*	TRUE	TRUE	TRUE	TRUE	5.45826	loop_1136	310000	9	22	0.560562	-0.0723917	-0.632953	0.231632	FALSE	FALSE	FALSE	11	5	7	13	5	6	8	4	22	11	13	8	14	10	9	8	7	3	5	6	14	9	13	5
chr1	113980000	113990000	10001	*	chr1	114660000	114670000	10001	*	FALSE	FALSE	FALSE	TRUE	2.70553	loop_1137	690000	1.20833	3	-0.571296	-0.30911	0.262186	0.887689	FALSE	FALSE	FALSE	2	2	0	1	1	2	2	1	1	0	3	2	0	1	1	0	0	2	0	1	2	3	1	1
chr1	114010000	114020000	10001	*	chr1	114200000	114210000	10001	*	TRUE	FALSE	FALSE	FALSE	3.034	loop_1138	200000	4.125	14	-0.564541	-1.22471	-0.66017	0.171922	FALSE	FALSE	FALSE	6	14	3	9	4	3	4	3	5	5	2	9	4	3	3	2	3	0	3	0	3	3	3	5
chr1	114090000	114100000	10001	*	chr1	114280000	114290000	10001	*	TRUE	FALSE	FALSE	TRUE	2.42923	loop_1139	200000	6.25	12	0.289519	-0.186627	-0.476146	0.634482	FALSE	FALSE	FALSE	6	9	8	8	2	3	4	7	7	12	8	11	6	4	4	9	3	3	5	7	4	6	5	9
chr1	114340000	114350000	10001	*	chr1	114550000	114560000	10001	*	TRUE	TRUE	TRUE	TRUE	4.52159	loop_1140	220000	5.66667	12	0.327364	-0.417935	-0.745299	0.381481	FALSE	FALSE	FALSE	8	10	6	3	4	3	4	5	6	12	10	8	5	5	7	5	1	5	2	2	9	8	4	4
chr1	114340000	114350000	10001	*	chr1	114670000	114680000	10001	*	TRUE	TRUE	FALSE	TRUE	3.96482	loop_1141	340000	4	8	-0.277386	-0.813877	-0.536492	0.450787	FALSE	FALSE	FALSE	6	3	5	6	5	5	3	5	5	3	8	5	2	3	3	5	5	1	1	1	3	4	6	3
chr1	114420000	114430000	10001	*	chr1	114560000	114570000	10001	*	TRUE	FALSE	FALSE	FALSE	3.30757	loop_1142	150000	4.58333	14	-0.196892	0.749723	0.946615	0.260968	FALSE	FALSE	FALSE	6	7	2	8	3	1	1	2	3	3	8	6	3	3	1	1	3	2	7	2	8	7	9	14
chr1	114580000	114590000	10001	*	chr1	114660000	114670000	10001	*	TRUE	FALSE	FALSE	FALSE	2.41955	loop_1143	90000	7.70833	14	-0.119119	-0.0703452	0.0487739	0.966645	FALSE	FALSE	FALSE	13	8	11	10	4	7	3	6	9	10	14	8	4	7	7	3	5	7	4	4	9	6	14	12
chr1	114610000	114620000	10001	*	chr1	114660000	114670000	10001	*	FALSE	FALSE	FALSE	TRUE	2.0053	loop_1144	60000	7.83333	15	-0.248898	-0.190281	0.058617	0.861737	FALSE	FALSE	FALSE	14	15	12	15	2	4	2	5	9	12	12	6	3	6	4	8	4	3	6	3	14	9	9	11
chr1	114710000	114720000	10001	*	chr1	114750000	114760000	10001	*	FALSE	FALSE	FALSE	TRUE	2.00348	loop_1145	50000	8.41667	19	0.739186	0.67439	-0.0647958	0.215737	FALSE	FALSE	FALSE	13	6	8	7	2	3	4	3	19	10	10	9	6	11	5	11	6	7	7	7	11	14	14	9
chr1	114970000	114980000	10001	*	chr1	115040000	115050000	10001	*	TRUE	TRUE	TRUE	TRUE	3.4318	loop_1146	80000	8.95833	16	-0.106113	0.218114	0.324226	0.767488	FALSE	FALSE	FALSE	16	7	12	15	2	4	7	5	15	9	11	15	3	8	4	3	11	4	4	5	15	12	12	16
chr1	114970000	114980000	10001	*	chr1	115110000	115120000	10001	*	TRUE	TRUE	TRUE	TRUE	9.49265	loop_1147	150000	11.375	22	-0.0721422	-0.385422	-0.31328	0.663441	FALSE	FALSE	FALSE	19	21	15	22	4	8	4	5	17	18	13	12	14	7	14	3	8	1	8	2	13	16	16	13
chr1	114980000	114990000	10001	*	chr1	115470000	115480000	10001	*	FALSE	FALSE	TRUE	FALSE	2.4038	loop_1148	500000	2.625	7	-0.483812	0.146499	0.630311	0.746017	FALSE	FALSE	FALSE	7	5	3	3	0	3	0	1	1	1	2	5	2	2	2	1	0	2	3	1	6	4	5	4
chr1	114980000	114990000	10001	*	chr1	115590000	115600000	10001	*	TRUE	TRUE	FALSE	TRUE	4.4814	loop_1149	620000	3.33333	6	0.433614	0.0471185	-0.386496	0.794	FALSE	FALSE	FALSE	5	3	5	5	1	1	0	3	5	6	2	5	5	1	5	3	0	1	2	4	6	2	6	4
chr1	115050000	115060000	10001	*	chr1	115100000	115110000	10001	*	TRUE	FALSE	TRUE	TRUE	2.30203	loop_1150	60000	8.70833	16	0.223694	0.149069	-0.0746253	0.887748	FALSE	FALSE	FALSE	15	8	11	8	3	4	3	8	16	12	7	12	8	5	9	6	1	5	8	1	16	14	14	15
chr1	115130000	115140000	10001	*	chr1	115460000	115470000	10001	*	TRUE	TRUE	TRUE	TRUE	5.34671	loop_1151	340000	10.9167	18	0.240792	0.140624	-0.100168	0.824569	FALSE	FALSE	FALSE	10	8	9	17	8	6	9	9	18	18	17	12	8	5	13	7	9	7	8	10	17	9	15	13
chr1	115130000	115140000	10001	*	chr1	115770000	115780000	10001	*	TRUE	FALSE	TRUE	TRUE	3.6329	loop_1152	650000	2.16667	6	-0.584451	0.337046	0.921497	0.593054	FALSE	FALSE	FALSE	3	4	3	0	2	2	1	1	2	0	2	2	1	0	4	1	1	1	1	3	5	2	5	6
chr1	115140000	115150000	10001	*	chr1	115590000	115600000	10001	*	TRUE	TRUE	TRUE	TRUE	5.5581	loop_1153	460000	7	14	0.853163	0.485505	-0.367658	0.208748	FALSE	FALSE	FALSE	7	7	8	6	3	2	3	2	11	6	10	14	7	5	10	10	3	6	2	6	9	10	12	9
chr1	115140000	115150000	10001	*	chr1	115320000	115330000	10001	*	TRUE	FALSE	FALSE	FALSE	3.52373	loop_1154	190000	4.41667	9	-0.435287	-0.375825	0.0594623	0.763073	FALSE	FALSE	FALSE	4	0	9	5	6	8	2	5	6	6	2	5	1	5	3	3	2	4	1	1	8	3	9	8
chr1	115150000	115160000	10001	*	chr1	115240000	115250000	10001	*	FALSE	FALSE	TRUE	TRUE	3.40568	loop_1155	100000	3.54167	12	0.074436	0.688025	0.613589	0.590088	FALSE	FALSE	FALSE	5	3	2	12	2	0	0	1	6	3	4	5	0	3	3	2	1	3	8	3	5	6	5	3
chr1	115270000	115280000	10001	*	chr1	115600000	115610000	10001	*	TRUE	FALSE	FALSE	TRUE	3.18711	loop_1156	340000	2.83333	10	-0.553248	0.125382	0.678629	0.679321	FALSE	FALSE	FALSE	7	3	4	3	1	1	1	3	3	2	2	1	4	1	3	1	3	3	2	0	3	10	5	2
chr1	115270000	115280000	10001	*	chr1	115460000	115470000	10001	*	FALSE	TRUE	TRUE	TRUE	2.71572	loop_1157	200000	7.41667	15	0.283069	0.430368	0.147299	0.675383	FALSE	FALSE	FALSE	7	8	10	7	7	3	3	3	15	7	10	8	4	5	7	7	4	8	8	5	11	12	15	4
chr1	115470000	115480000	10001	*	chr1	115590000	115600000	10001	*	TRUE	FALSE	TRUE	TRUE	3.40917	loop_1158	130000	7.70833	13	-0.201196	-0.286883	-0.0856875	0.816766	FALSE	FALSE	FALSE	7	8	8	7	8	8	7	11	12	13	9	7	5	9	1	5	4	3	5	4	12	12	10	10
chr1	115540000	115550000	10001	*	chr1	115590000	115600000	10001	*	TRUE	TRUE	TRUE	TRUE	2.35096	loop_1159	60000	10.5	17	-0.0133302	0.141714	0.155044	0.909321	FALSE	FALSE	FALSE	10	16	10	15	6	6	9	7	12	17	17	9	9	7	8	6	6	9	14	9	16	9	12	13
chr1	115600000	115610000	10001	*	chr1	115700000	115710000	10001	*	TRUE	TRUE	TRUE	TRUE	3.93107	loop_1160	110000	9.29167	19	-0.407911	0.0551379	0.463049	0.509554	FALSE	FALSE	FALSE	11	13	19	12	9	2	8	5	12	14	7	10	3	5	9	4	10	10	8	7	14	7	11	13
chr1	115600000	115610000	10001	*	chr1	115760000	115770000	10001	*	TRUE	TRUE	TRUE	TRUE	6.51568	loop_1161	170000	10.4167	20	-0.0982028	0.110289	0.208492	0.879965	FALSE	FALSE	FALSE	13	11	20	12	2	6	12	6	8	18	17	11	12	4	9	3	7	10	10	10	13	11	9	16
chr1	115610000	115620000	10001	*	chr1	115980000	115990000	10001	*	TRUE	FALSE	FALSE	TRUE	3.96454	loop_1162	380000	2.75	7	-0.127873	0.193982	0.321855	0.923494	FALSE	FALSE	FALSE	1	4	6	4	0	3	2	1	5	3	3	1	2	0	2	4	3	1	2	2	4	6	0	7
chr1	115710000	115720000	10001	*	chr1	115760000	115770000	10001	*	TRUE	TRUE	FALSE	TRUE	3.09227	loop_1163	60000	15.8333	26	0.0681452	-0.619654	-0.687799	0.0666084	FALSE	FALSE	FALSE	18	23	21	21	15	17	9	9	24	26	21	13	15	19	24	9	7	4	11	5	17	13	20	19
chr1	115710000	115720000	10001	*	chr1	115970000	115980000	10001	*	TRUE	FALSE	FALSE	FALSE	3.96179	loop_1164	270000	3.33333	8	-0.641053	-0.543532	0.0975212	0.628937	FALSE	FALSE	FALSE	8	4	6	5	0	6	3	1	5	7	1	2	1	2	4	1	3	1	0	2	7	3	3	5
chr1	115780000	115790000	10001	*	chr1	116490000	116500000	10001	*	FALSE	FALSE	TRUE	TRUE	3.94228	loop_1165	720000	1.375	6	0.264251	0.653408	0.389157	0.847383	FALSE	FALSE	FALSE	2	2	1	1	0	1	0	1	2	2	2	1	0	1	1	1	0	2	0	0	4	6	1	2
chr1	115800000	115810000	10001	*	chr1	115980000	115990000	10001	*	TRUE	TRUE	TRUE	TRUE	6.45181	loop_1166	190000	12.7083	27	0.477141	0.475998	-0.00114308	0.458477	FALSE	FALSE	FALSE	6	16	20	20	5	3	8	1	21	27	20	19	13	6	6	6	10	4	9	6	24	19	18	18
chr1	116070000	116080000	10001	*	chr1	116100000	116110000	10001	*	TRUE	FALSE	TRUE	FALSE	2.41226	loop_1167	40000	9.25	20	-0.271851	0.0985517	0.370403	0.689293	FALSE	FALSE	FALSE	14	16	20	9	4	5	6	3	13	10	11	9	6	5	10	3	11	5	4	11	10	15	13	9
chr1	116130000	116140000	10001	*	chr1	116490000	116500000	10001	*	TRUE	TRUE	TRUE	TRUE	8.62596	loop_1168	370000	7.75	14	0.321186	0.266131	-0.0550555	0.772693	FALSE	FALSE	FALSE	5	10	11	8	7	4	4	3	12	14	10	7	9	8	10	1	7	11	6	5	11	7	8	8
chr1	116130000	116140000	10001	*	chr1	116700000	116710000	10001	*	FALSE	FALSE	FALSE	TRUE	2.40924	loop_1169	580000	0.958333	3	-0.173266	-0.0864196	0.086846	0.989868	FALSE	FALSE	FALSE	0	3	1	1	1	1	0	1	3	1	2	1	0	1	0	0	1	0	1	1	0	1	2	1
chr1	116150000	116160000	10001	*	chr1	116390000	116400000	10001	*	TRUE	FALSE	TRUE	TRUE	3.629	loop_1170	250000	7.20833	15	0.339443	0.897383	0.55794	0.16772	FALSE	FALSE	FALSE	5	9	3	12	0	6	2	4	14	7	7	9	3	6	5	3	5	6	3	9	15	15	11	14
chr1	116360000	116370000	10001	*	chr1	116480000	116490000	10001	*	TRUE	TRUE	FALSE	FALSE	3.66643	loop_1171	130000	6.95833	12	0.136802	0.0245875	-0.112214	0.956352	FALSE	FALSE	FALSE	9	7	11	7	5	2	4	6	12	7	9	10	8	5	9	1	6	2	6	4	10	12	12	3
chr1	116400000	116410000	10001	*	chr1	116470000	116480000	10001	*	FALSE	FALSE	TRUE	FALSE	2.19952	loop_1172	80000	7.41667	20	-0.177582	0.784262	0.961844	0.0618542	FALSE	FALSE	FALSE	8	11	8	6	5	4	2	3	8	4	8	4	5	5	6	4	8	9	5	5	15	15	10	20
chr1	116510000	116520000	10001	*	chr1	116550000	116560000	10001	*	TRUE	FALSE	TRUE	TRUE	2.93149	loop_1173	50000	9.25	17	0.289582	0.0528212	-0.236761	0.761746	FALSE	FALSE	FALSE	11	8	12	7	9	7	7	3	13	15	16	11	11	7	7	5	6	5	4	4	11	17	15	11
chr1	116570000	116580000	10001	*	chr1	116670000	116680000	10001	*	FALSE	FALSE	FALSE	TRUE	2.27956	loop_1174	110000	6.375	14	0.0940429	-0.0231388	-0.117182	0.972342	FALSE	FALSE	FALSE	13	7	10	2	4	3	5	4	9	8	11	10	5	6	3	3	2	4	1	6	14	6	9	8
chr1	116570000	116580000	10001	*	chr1	116720000	116730000	10001	*	FALSE	FALSE	TRUE	FALSE	3.3731	loop_1175	160000	6.33333	21	-0.251712	0.457467	0.709179	0.378862	FALSE	FALSE	FALSE	8	4	4	6	5	4	5	8	11	9	4	7	5	2	3	0	6	5	5	5	12	5	8	21
chr1	116570000	116580000	10001	*	chr1	116810000	116820000	10001	*	TRUE	TRUE	TRUE	TRUE	4.28895	loop_1176	250000	5.33333	10	0.73571	0.566555	-0.169155	0.405151	FALSE	FALSE	FALSE	3	3	5	6	2	4	1	5	7	3	9	9	7	6	8	3	5	3	5	4	8	7	10	5
chr1	116570000	116580000	10001	*	chr1	117050000	117060000	10001	*	TRUE	TRUE	TRUE	TRUE	4.89544	loop_1177	490000	4.875	12	0.172027	0.0167121	-0.155315	0.949238	FALSE	FALSE	FALSE	11	9	4	5	1	4	2	1	12	6	3	5	3	3	6	5	7	4	2	2	9	6	2	5
chr1	116580000	116590000	10001	*	chr1	116910000	116920000	10001	*	FALSE	TRUE	FALSE	FALSE	2.83922	loop_1178	340000	2.625	8	1.39244	1.03353	-0.358904	0.237977	FALSE	FALSE	FALSE	2	2	2	2	0	0	1	2	8	3	5	7	0	4	3	1	2	3	1	4	2	4	2	3
chr1	116730000	116740000	10001	*	chr1	116810000	116820000	10001	*	TRUE	FALSE	FALSE	TRUE	2.92658	loop_1179	90000	8.91667	16	-0.338262	-0.365937	-0.0276749	0.637188	FALSE	FALSE	FALSE	10	10	14	16	6	11	8	5	9	14	11	14	8	4	3	6	5	3	8	7	13	6	7	16
chr1	116730000	116740000	10001	*	chr1	117050000	117060000	10001	*	TRUE	TRUE	TRUE	TRUE	7.32514	loop_1180	330000	11.5833	21	-0.042319	-0.226992	-0.184673	0.826697	FALSE	FALSE	FALSE	14	15	20	20	7	6	6	8	18	21	15	15	7	7	8	9	7	9	3	8	13	13	12	17
chr1	116740000	116750000	10001	*	chr1	117300000	117310000	10001	*	FALSE	TRUE	FALSE	FALSE	3.10116	loop_1181	570000	1.29167	4	2.30642	1.7509	-0.555529	0.190503	FALSE	FALSE	FALSE	0	1	1	0	0	0	1	0	2	1	4	3	3	1	1	2	4	0	2	0	0	4	0	1
chr1	116850000	116860000	10001	*	chr1	117050000	117060000	10001	*	TRUE	TRUE	FALSE	TRUE	4.26886	loop_1182	210000	6.95833	18	-0.0469805	-0.727768	-0.680787	0.282936	FALSE	FALSE	FALSE	18	9	7	10	4	6	4	5	9	10	12	7	5	10	6	5	4	4	2	2	9	8	3	8
chr1	116900000	116910000	10001	*	chr1	117050000	117060000	10001	*	FALSE	TRUE	FALSE	FALSE	2.9908	loop_1183	160000	6.04167	13	0.647587	0.208624	-0.438963	0.439236	FALSE	FALSE	FALSE	10	5	6	8	1	3	3	2	7	13	12	10	3	6	4	8	4	1	4	5	10	6	6	8
chr1	117060000	117070000	10001	*	chr1	117120000	117130000	10001	*	TRUE	TRUE	TRUE	TRUE	3.42492	loop_1184	70000	11.125	25	0.524798	-0.156591	-0.681388	0.185309	FALSE	FALSE	FALSE	15	9	20	14	8	4	4	4	16	24	14	25	16	10	8	6	3	4	7	9	15	11	8	13
chr1	117070000	117080000	10001	*	chr1	117280000	117290000	10001	*	TRUE	TRUE	FALSE	TRUE	5.63724	loop_1185	220000	7.66667	17	0.225157	0.0494169	-0.17574	0.880496	FALSE	FALSE	FALSE	14	8	7	10	3	6	3	5	17	7	12	10	5	7	5	7	2	7	7	6	6	11	13	6
chr1	117120000	117130000	10001	*	chr1	117280000	117290000	10001	*	TRUE	TRUE	TRUE	TRUE	3.703	loop_1186	170000	9.625	20	0.353643	0.931929	0.578286	0.078158	FALSE	FALSE	FALSE	9	5	14	11	3	2	7	2	18	11	6	8	8	7	7	7	10	11	11	2	20	19	16	17
chr1	117330000	117340000	10001	*	chr1	117760000	117770000	10001	*	FALSE	FALSE	FALSE	TRUE	3.57317	loop_1187	440000	1.83333	5	-0.163291	-0.257502	-0.0942113	0.966846	FALSE	FALSE	FALSE	3	1	3	3	0	2	2	1	3	4	1	1	0	5	0	1	2	0	0	1	1	2	3	5
chr1	117510000	117520000	10001	*	chr1	117890000	117900000	10001	*	TRUE	TRUE	TRUE	TRUE	5.4516	loop_1188	390000	6.54167	14	0.0927731	-0.160013	-0.252786	0.891443	FALSE	FALSE	FALSE	14	9	10	11	3	3	3	0	9	10	14	9	4	5	2	6	3	2	4	3	11	8	8	6
chr1	117530000	117540000	10001	*	chr1	117570000	117580000	10001	*	FALSE	FALSE	TRUE	FALSE	2.25302	loop_1189	50000	7.875	17	0.444084	0.671255	0.227171	0.346857	FALSE	FALSE	FALSE	4	12	2	11	3	6	3	5	10	12	8	9	7	9	7	4	10	7	4	6	17	10	10	13
chr1	117530000	117540000	10001	*	chr1	117660000	117670000	10001	*	FALSE	FALSE	TRUE	FALSE	2.31808	loop_1190	140000	5.33333	16	0.105618	0.57877	0.473152	0.554348	FALSE	FALSE	FALSE	7	4	4	5	4	1	5	3	10	7	7	4	2	3	3	3	5	2	3	3	16	14	4	9
chr1	117530000	117540000	10001	*	chr1	117750000	117760000	10001	*	TRUE	TRUE	TRUE	TRUE	5.16996	loop_1191	230000	11.6667	22	0.0983682	0.458901	0.360533	0.451227	FALSE	FALSE	FALSE	19	15	19	9	4	8	2	5	12	20	13	9	11	11	9	6	14	13	9	9	11	22	14	16
chr1	117600000	117610000	10001	*	chr1	117900000	117910000	10001	*	FALSE	TRUE	FALSE	FALSE	2.93527	loop_1192	310000	3.29167	12	0.80082	-0.496572	-1.29739	0.168147	FALSE	FALSE	FALSE	5	4	5	4	1	0	1	2	12	3	7	3	5	4	2	5	1	1	1	1	4	4	3	1
chr1	117700000	117710000	10001	*	chr1	117890000	117900000	10001	*	TRUE	TRUE	FALSE	TRUE	3.55561	loop_1193	200000	5.125	12	0.660964	-0.279637	-0.940601	0.221652	FALSE	FALSE	FALSE	9	5	4	2	3	2	7	2	11	12	7	5	5	5	9	4	3	1	1	3	4	4	5	10
chr1	117760000	117770000	10001	*	chr1	117890000	117900000	10001	*	FALSE	FALSE	TRUE	TRUE	3.74296	loop_1194	140000	4.79167	12	0.311655	0.702479	0.390825	0.513142	FALSE	FALSE	FALSE	6	4	9	2	3	2	2	1	8	7	7	7	1	1	4	4	3	4	5	3	12	5	5	10
chr1	117810000	117820000	10001	*	chr1	117890000	117900000	10001	*	TRUE	TRUE	FALSE	TRUE	3.10989	loop_1195	90000	8.83333	15	0.0264884	-0.292713	-0.319201	0.73228	FALSE	FALSE	FALSE	12	13	9	14	6	5	8	5	15	15	11	10	4	8	10	6	8	3	4	6	11	7	10	12
chr1	118070000	118080000	10001	*	chr1	118150000	118160000	10001	*	TRUE	FALSE	FALSE	TRUE	3.33675	loop_1196	90000	7.20833	15	-0.26393	-0.155381	0.108549	0.8629	FALSE	FALSE	FALSE	12	15	8	15	1	7	4	2	14	10	8	8	5	3	4	4	6	3	5	6	4	12	9	8
chr1	118070000	118080000	10001	*	chr1	119360000	119370000	10001	*	TRUE	FALSE	TRUE	TRUE	3.82581	loop_1197	1300000	3.29167	7	0.237329	0.72502	0.487691	0.575527	FALSE	FALSE	FALSE	2	2	4	7	1	1	2	2	3	3	6	5	1	2	2	4	4	4	4	4	5	6	2	3
chr1	118150000	118160000	10001	*	chr1	119260000	119270000	10001	*	FALSE	FALSE	TRUE	TRUE	3.6222	loop_1198	1120000	1.91667	5	0.804005	0.356236	-0.447769	0.71975	FALSE	FALSE	FALSE	4	3	3	0	1	0	1	0	2	5	4	4	3	1	0	2	2	0	2	3	0	4	2	0
chr1	118150000	118160000	10001	*	chr1	118710000	118720000	10001	*	TRUE	FALSE	FALSE	FALSE	3.32924	loop_1199	570000	3.41667	10	-0.768488	-0.48302	0.285468	0.57166	FALSE	FALSE	FALSE	5	7	10	6	2	2	1	2	1	3	2	5	3	1	4	2	5	1	0	0	3	7	4	6
chr1	118150000	118160000	10001	*	chr1	119000000	119010000	10001	*	TRUE	FALSE	TRUE	TRUE	4.40434	loop_1200	860000	3.625	9	-0.0411024	-0.188896	-0.147794	0.962826	FALSE	FALSE	FALSE	7	7	4	9	1	1	2	0	4	5	2	3	1	8	4	3	2	3	3	2	6	3	4	3
chr1	118150000	118160000	10001	*	chr1	119360000	119370000	10001	*	TRUE	TRUE	TRUE	TRUE	3.74149	loop_1201	1220000	3.41667	7	-0.212569	-0.946529	-0.73396	0.401071	FALSE	FALSE	FALSE	7	6	6	6	2	4	1	2	6	5	6	3	3	4	1	3	2	3	1	1	1	2	3	4
chr1	119270000	119280000	10001	*	chr1	119360000	119370000	10001	*	TRUE	TRUE	TRUE	TRUE	4.28335	loop_1202	100000	12.5417	23	0.153474	-0.458435	-0.611909	0.240595	FALSE	FALSE	FALSE	12	16	16	16	10	6	13	11	19	21	23	17	12	11	8	10	8	4	4	4	10	21	18	11
chr1	119610000	119620000	10001	*	chr1	119670000	119680000	10001	*	TRUE	TRUE	FALSE	TRUE	4.38051	loop_1203	70000	13	27	0.0979644	0.132704	0.0347397	0.942489	FALSE	FALSE	FALSE	19	17	12	12	9	6	13	6	15	18	16	9	15	3	17	14	14	9	5	9	13	27	14	20
chr1	145890000	145900000	10001	*	chr1	146010000	146020000	10001	*	FALSE	TRUE	FALSE	FALSE	6.08229	loop_1204	130000	7.95833	14	0.560449	0.688616	0.128167	0.265753	FALSE	FALSE	FALSE	11	11	6	7	6	6	9	3	13	7	7	13	6	4	9	6	11	4	7	5	11	14	6	9
chr1	147490000	147500000	10001	*	chr1	147630000	147640000	10001	*	FALSE	TRUE	FALSE	TRUE	5.47449	loop_1205	150000	14.4167	30	0.503507	-0.303679	-0.807187	0.0418399	FALSE	FALSE	FALSE	18	24	28	20	11	10	9	13	23	30	18	20	12	12	13	12	9	5	7	6	11	11	15	9
chr1	147490000	147500000	10001	*	chr1	147890000	147900000	10001	*	TRUE	FALSE	TRUE	TRUE	5.39094	loop_1206	410000	7.70833	21	-0.398988	0.339719	0.738707	0.365022	FALSE	FALSE	FALSE	10	7	21	20	3	1	11	6	6	13	8	5	3	1	5	2	6	4	5	5	12	8	12	11
chr1	147640000	147650000	10001	*	chr1	147890000	147900000	10001	*	TRUE	FALSE	TRUE	TRUE	6.66492	loop_1207	260000	11.9167	21	-0.108402	0.724032	0.832434	0.0296881	FALSE	FALSE	FALSE	9	13	15	13	10	8	13	18	11	13	10	12	10	3	4	6	10	12	9	13	16	17	20	21
chr1	147720000	147730000	10001	*	chr1	147880000	147890000	10001	*	TRUE	FALSE	FALSE	TRUE	4.23624	loop_1208	170000	9.5	22	-0.169278	-0.433003	-0.263725	0.630086	FALSE	FALSE	FALSE	19	22	20	14	9	3	6	13	13	6	10	13	10	9	6	2	6	3	6	4	6	8	10	10
chr1	149960000	149970000	10001	*	chr1	150050000	150060000	10001	*	TRUE	TRUE	FALSE	FALSE	7.42448	loop_1209	100000	15.9583	38	-0.0151303	0.0821457	0.097276	0.957777	FALSE	FALSE	FALSE	38	25	26	28	13	5	7	16	19	19	19	22	8	11	9	7	12	6	9	6	21	15	19	23
chr1	149960000	149970000	10001	*	chr1	150170000	150180000	10001	*	FALSE	TRUE	FALSE	FALSE	4.45841	loop_1210	220000	7.45833	12	0.528916	0.424886	-0.104029	0.47102	FALSE	FALSE	FALSE	10	8	8	10	9	2	6	6	10	10	9	8	6	9	4	7	3	7	4	6	12	6	10	9
chr1	150070000	150080000	10001	*	chr1	150160000	150170000	10001	*	TRUE	TRUE	TRUE	TRUE	5.11097	loop_1211	100000	14.5833	37	-0.0444571	-0.888284	-0.843827	0.0192687	FALSE	TRUE	TRUE	32	28	20	37	12	17	14	9	14	19	21	18	14	12	9	12	6	6	3	7	6	10	12	12
chr1	150480000	150490000	10001	*	chr1	150530000	150540000	10001	*	TRUE	TRUE	FALSE	TRUE	3.50179	loop_1212	60000	12.2083	27	-0.236489	-0.900753	-0.664265	0.0478944	FALSE	FALSE	FALSE	27	12	13	17	17	15	25	17	17	13	16	11	8	11	12	4	6	7	5	2	13	11	7	7
chr1	150560000	150570000	10001	*	chr1	150810000	150820000	10001	*	FALSE	TRUE	FALSE	TRUE	2.6878	loop_1213	260000	4.70833	11	0.365863	0.427432	0.0615689	0.751244	FALSE	FALSE	FALSE	5	5	4	10	4	2	4	4	8	6	8	4	1	6	2	2	4	3	1	1	11	8	4	6
chr1	150570000	150580000	10001	*	chr1	150620000	150630000	10001	*	TRUE	TRUE	TRUE	TRUE	3.98077	loop_1214	60000	14.5417	22	0.214507	0.0327866	-0.181721	0.790676	FALSE	FALSE	FALSE	22	19	19	21	13	12	17	10	17	17	20	18	12	12	11	8	11	2	6	7	19	19	15	22
chr1	151010000	151020000	10001	*	chr1	151050000	151060000	10001	*	FALSE	TRUE	FALSE	FALSE	2.34191	loop_1215	50000	10.0833	18	0.51602	0.481805	-0.0342144	0.357002	FALSE	FALSE	FALSE	12	11	6	12	5	7	7	17	11	16	8	13	10	7	10	6	4	6	5	3	16	16	18	16
chr1	151030000	151040000	10001	*	chr1	151150000	151160000	10001	*	FALSE	FALSE	TRUE	TRUE	3.62153	loop_1216	130000	6.08333	16	-0.0905478	0.113087	0.203634	0.937121	FALSE	FALSE	FALSE	16	5	5	10	8	5	4	6	6	9	7	5	5	5	1	3	6	3	1	3	5	13	6	9
chr1	151090000	151100000	10001	*	chr1	151150000	151160000	10001	*	TRUE	TRUE	FALSE	TRUE	3.18899	loop_1217	70000	12.6667	23	0.052512	-0.342421	-0.394933	0.555488	FALSE	FALSE	FALSE	17	16	13	23	16	15	12	17	11	23	19	13	5	10	10	10	6	7	8	5	18	12	8	10
chr1	151200000	151210000	10001	*	chr1	151240000	151250000	10001	*	TRUE	TRUE	TRUE	TRUE	2.73412	loop_1218	50000	13.5	27	-0.239233	-0.287516	-0.0482823	0.686145	FALSE	FALSE	FALSE	13	27	25	15	18	18	12	16	20	12	14	11	7	7	10	11	12	5	9	3	22	12	13	12
chr1	151300000	151310000	10001	*	chr1	151340000	151350000	10001	*	FALSE	TRUE	TRUE	TRUE	3.11951	loop_1219	50000	18.9167	36	0.773679	0.339113	-0.434566	0.01147	TRUE	FALSE	FALSE	29	13	17	22	15	17	15	14	31	25	36	25	15	16	23	12	11	9	11	14	24	24	19	17
chr1	151300000	151310000	10001	*	chr1	151400000	151410000	10001	*	TRUE	FALSE	TRUE	TRUE	3.7899	loop_1220	110000	8.625	21	-0.460182	0.291312	0.751494	0.255899	FALSE	FALSE	FALSE	10	15	9	9	11	10	9	9	6	6	3	6	3	4	8	8	4	6	4	6	21	12	9	19
chr1	151440000	151450000	10001	*	chr1	151730000	151740000	10001	*	TRUE	TRUE	TRUE	TRUE	4.47605	loop_1221	300000	10	20	0.00893243	0.26224	0.253307	0.786227	FALSE	FALSE	FALSE	19	16	11	20	8	7	9	4	10	15	10	9	5	11	5	5	3	7	9	9	15	10	15	8
chr1	151440000	151450000	10001	*	chr1	151830000	151840000	10001	*	FALSE	FALSE	TRUE	TRUE	3.01464	loop_1222	400000	4.83333	10	0.403261	0.0715894	-0.331671	0.760292	FALSE	FALSE	FALSE	10	4	7	5	3	7	4	2	8	10	5	5	5	3	1	5	4	3	0	2	7	6	5	5
chr1	151450000	151460000	10001	*	chr1	151510000	151520000	10001	*	FALSE	FALSE	TRUE	FALSE	2.9175	loop_1223	70000	9.41667	16	0.403756	0.755268	0.351511	0.174879	FALSE	FALSE	FALSE	15	10	8	15	7	5	4	8	9	13	14	6	9	6	5	8	5	11	7	8	14	11	16	12
chr1	151530000	151540000	10001	*	chr1	151730000	151740000	10001	*	TRUE	FALSE	TRUE	TRUE	3.23627	loop_1224	210000	9.75	19	-0.211657	0.264183	0.475839	0.536853	FALSE	FALSE	FALSE	13	15	10	7	8	11	15	12	10	7	10	5	11	3	8	5	5	9	7	5	19	13	13	13
chr1	151590000	151600000	10001	*	chr1	151730000	151740000	10001	*	TRUE	FALSE	TRUE	TRUE	3.45039	loop_1225	150000	12	27	0.109976	0.510809	0.400833	0.359787	FALSE	FALSE	FALSE	13	17	18	15	8	10	9	11	11	20	5	14	6	9	9	7	7	5	10	7	27	13	20	17
chr1	151600000	151610000	10001	*	chr1	151840000	151850000	10001	*	FALSE	FALSE	TRUE	TRUE	2.8182	loop_1226	250000	2.75	7	0.608339	-0.253083	-0.861422	0.534779	FALSE	FALSE	FALSE	3	4	3	7	2	2	1	2	3	2	4	3	3	5	3	3	3	0	0	0	4	4	0	5
chr1	151930000	151940000	10001	*	chr1	151990000	152000000	10001	*	TRUE	TRUE	TRUE	TRUE	4.22022	loop_1227	70000	18.9167	35	0.319885	-0.591049	-0.910934	0.0102592	FALSE	TRUE	TRUE	33	35	31	26	17	16	16	14	33	23	29	29	23	8	14	17	4	6	5	7	18	9	16	25
chr1	152050000	152060000	10001	*	chr1	152140000	152150000	10001	*	TRUE	FALSE	TRUE	TRUE	5.11712	loop_1228	100000	12.625	24	0.16	0.146707	-0.0132932	0.887508	FALSE	FALSE	FALSE	24	18	18	19	4	12	11	11	15	16	14	9	16	11	9	6	8	7	12	7	10	11	21	14
chr1	152050000	152060000	10001	*	chr1	152180000	152190000	10001	*	TRUE	TRUE	TRUE	TRUE	7.7269	loop_1229	140000	17.6667	40	0.0220655	-0.481962	-0.504027	0.220748	FALSE	FALSE	FALSE	28	25	28	40	16	15	16	20	21	23	20	23	21	9	17	7	7	7	7	11	20	13	12	18
chr1	152050000	152060000	10001	*	chr1	152450000	152460000	10001	*	TRUE	FALSE	TRUE	TRUE	5.26294	loop_1230	410000	5.95833	12	-0.240499	-0.160294	0.0802049	0.885352	FALSE	FALSE	FALSE	8	11	12	11	5	4	7	6	5	7	9	8	4	1	4	3	4	3	5	4	7	6	5	4
chr1	152130000	152140000	10001	*	chr1	152450000	152460000	10001	*	TRUE	TRUE	TRUE	TRUE	3.63326	loop_1231	330000	6.54167	14	0.753912	0.152428	-0.601484	0.292305	FALSE	FALSE	FALSE	8	7	12	13	3	2	4	3	8	11	9	5	14	6	4	6	1	4	4	1	9	5	11	7
chr1	152140000	152150000	10001	*	chr1	152180000	152190000	10001	*	TRUE	TRUE	TRUE	TRUE	3.70174	loop_1232	50000	30.25	56	0.301205	0.0154669	-0.285738	0.383451	FALSE	FALSE	FALSE	38	47	41	45	28	27	20	27	53	40	56	35	26	14	17	17	15	15	16	13	38	25	41	32
chr1	152190000	152200000	10001	*	chr1	152340000	152350000	10001	*	TRUE	FALSE	TRUE	TRUE	3.88071	loop_1233	160000	10.0833	26	-0.312455	-0.37516	-0.062705	0.65227	FALSE	FALSE	FALSE	24	26	17	16	9	6	12	4	9	15	12	7	8	7	4	5	2	1	4	7	14	10	8	15
chr1	152190000	152200000	10001	*	chr1	152450000	152460000	10001	*	TRUE	TRUE	TRUE	TRUE	6.59897	loop_1234	270000	12.0417	25	0.108516	0.550515	0.441999	0.302972	FALSE	FALSE	FALSE	20	13	19	17	7	10	7	9	13	14	15	20	4	3	6	8	8	5	7	8	25	17	20	14
chr1	152340000	152350000	10001	*	chr1	152440000	152450000	10001	*	FALSE	FALSE	FALSE	TRUE	2.80042	loop_1235	110000	9.91667	25	-0.196507	0.025173	0.221679	0.87216	FALSE	FALSE	FALSE	22	16	19	25	9	8	4	2	13	6	16	18	4	6	1	4	8	6	4	9	12	12	3	11
chr1	152390000	152400000	10001	*	chr1	152430000	152440000	10001	*	TRUE	FALSE	FALSE	FALSE	2.31416	loop_1236	50000	8.08333	21	-0.520174	-0.633654	-0.113481	0.311964	FALSE	FALSE	FALSE	16	15	21	20	6	10	3	9	9	11	7	5	2	9	5	3	3	4	2	5	9	5	6	9
chr1	152490000	152500000	10001	*	chr1	152530000	152540000	10001	*	TRUE	TRUE	FALSE	TRUE	4.03703	loop_1237	50000	19.125	45	-0.138878	-0.723361	-0.584483	0.0395115	FALSE	FALSE	FALSE	30	45	33	45	11	17	21	20	26	25	21	28	19	10	11	9	8	9	9	12	13	14	10	13
chr1	152550000	152560000	10001	*	chr1	152820000	152830000	10001	*	FALSE	TRUE	TRUE	TRUE	4.4611	loop_1238	280000	2.95833	10	-0.297059	-0.0169296	0.280129	0.917207	FALSE	FALSE	FALSE	6	1	9	10	3	0	2	2	3	2	3	2	2	2	2	2	2	3	0	4	1	2	3	5
chr1	152560000	152570000	10001	*	chr1	153210000	153220000	10001	*	TRUE	FALSE	FALSE	FALSE	4.1044	loop_1239	660000	2.625	11	-0.733534	-0.430522	0.303012	0.690409	FALSE	FALSE	FALSE	6	5	11	5	3	2	1	0	5	1	1	1	0	2	2	2	2	0	0	2	4	5	2	1
chr1	152560000	152570000	10001	*	chr1	153250000	153260000	10001	*	FALSE	FALSE	TRUE	FALSE	4.43053	loop_1240	700000	1.5	5	-0.953686	0.967343	1.92103	0.234479	FALSE	FALSE	FALSE	3	5	2	0	1	0	1	1	0	1	2	0	0	0	1	1	1	1	3	0	2	4	4	3
chr1	152650000	152660000	10001	*	chr1	152770000	152780000	10001	*	FALSE	FALSE	FALSE	TRUE	3.37892	loop_1241	130000	7.95833	18	0.33543	0.204834	-0.130595	0.758945	FALSE	FALSE	FALSE	12	14	11	11	6	3	6	7	8	18	14	8	4	7	3	5	7	7	1	4	10	7	9	9
chr1	152650000	152660000	10001	*	chr1	152860000	152870000	10001	*	TRUE	TRUE	TRUE	TRUE	6.27261	loop_1242	220000	10.875	28	-0.163793	-0.0727854	0.091008	0.917338	FALSE	FALSE	FALSE	22	15	28	19	7	9	5	9	16	13	11	12	5	3	6	9	5	6	5	6	18	8	13	11
chr1	152650000	152660000	10001	*	chr1	152920000	152930000	10001	*	TRUE	TRUE	TRUE	TRUE	7.51508	loop_1243	280000	6.375	15	-0.135108	0.192886	0.327994	0.843772	FALSE	FALSE	FALSE	11	12	15	7	3	4	7	3	4	7	7	10	3	4	3	3	5	0	4	1	12	11	9	8
chr1	152660000	152670000	10001	*	chr1	153200000	153210000	10001	*	TRUE	TRUE	TRUE	TRUE	4.23708	loop_1244	550000	4.54167	10	-0.0816036	-0.144642	-0.0630387	0.972976	FALSE	FALSE	FALSE	9	9	10	10	3	4	3	0	7	3	5	6	6	2	0	4	3	4	1	2	6	5	3	4
chr1	152870000	152880000	10001	*	chr1	152920000	152930000	10001	*	TRUE	TRUE	TRUE	TRUE	3.83942	loop_1245	60000	27.375	57	0.134539	0.0106137	-0.123926	0.864884	FALSE	FALSE	FALSE	54	54	33	57	15	24	10	20	38	34	37	37	16	12	20	18	14	14	8	15	33	27	30	37
chr1	152870000	152880000	10001	*	chr1	153030000	153040000	10001	*	TRUE	FALSE	TRUE	TRUE	3.43907	loop_1246	170000	7.66667	19	-0.181223	-0.325677	-0.144454	0.79672	FALSE	FALSE	FALSE	19	11	17	12	8	9	3	5	10	11	7	17	4	3	3	2	8	5	2	4	10	4	5	5
chr1	152870000	152880000	10001	*	chr1	153190000	153200000	10001	*	TRUE	TRUE	TRUE	TRUE	4.35924	loop_1247	330000	11.5833	22	-0.392588	0.213045	0.605633	0.312585	FALSE	FALSE	FALSE	17	14	20	22	9	8	12	15	14	9	9	14	1	2	9	9	9	9	11	4	20	12	11	18
chr1	152920000	152930000	10001	*	chr1	153190000	153200000	10001	*	TRUE	FALSE	TRUE	TRUE	3.74866	loop_1248	280000	9.16667	19	-0.435971	0.216209	0.652179	0.390971	FALSE	FALSE	FALSE	19	17	17	19	5	8	5	4	6	6	13	10	5	1	3	7	5	3	5	4	13	13	13	19
chr1	153040000	153050000	10001	*	chr1	153180000	153190000	10001	*	TRUE	FALSE	TRUE	TRUE	2.43237	loop_1249	150000	6.08333	11	-0.0215402	0.659131	0.680671	0.318765	FALSE	FALSE	FALSE	7	9	9	9	3	4	6	5	11	9	3	7	3	2	1	3	4	3	7	6	7	9	10	9
chr1	153350000	153360000	10001	*	chr1	153400000	153410000	10001	*	TRUE	TRUE	FALSE	TRUE	2.66346	loop_1250	60000	15.2083	30	0.306335	-0.49075	-0.797085	0.0724248	FALSE	FALSE	FALSE	26	20	22	21	11	19	10	20	30	23	23	13	8	9	16	16	7	6	3	6	22	8	12	14
chr1	153350000	153360000	10001	*	chr1	153450000	153460000	10001	*	FALSE	TRUE	FALSE	FALSE	4.11574	loop_1251	110000	8.45833	16	-0.086034	-0.211339	-0.125305	0.894929	FALSE	FALSE	FALSE	11	12	15	16	9	8	8	8	13	11	9	5	4	11	6	3	4	3	8	3	7	13	9	7
chr1	153350000	153360000	10001	*	chr1	153490000	153500000	10001	*	TRUE	FALSE	TRUE	TRUE	8.92108	loop_1252	150000	20.7083	33	-0.00770576	0.262197	0.269903	0.588841	FALSE	FALSE	FALSE	29	26	27	25	16	20	30	18	23	18	27	16	15	16	19	9	12	16	21	17	33	31	16	17
chr1	153460000	153470000	10001	*	chr1	153490000	153500000	10001	*	FALSE	FALSE	TRUE	FALSE	2.31007	loop_1253	40000	14.875	28	0.114902	0.00648162	-0.108421	0.93251	FALSE	FALSE	FALSE	28	17	26	22	11	18	13	8	18	20	16	18	11	9	17	6	9	10	9	9	13	17	9	23
chr1	153490000	153500000	10001	*	chr1	153670000	153680000	10001	*	FALSE	TRUE	FALSE	FALSE	5.42882	loop_1254	190000	5.875	21	3.78349	1.11895	-2.66453	3.77751e-20	TRUE	TRUE	TRUE	1	1	2	1	1	2	2	1	16	19	11	21	10	14	8	14	3	3	2	1	3	3	1	1
chr1	153510000	153520000	10001	*	chr1	153620000	153630000	10001	*	TRUE	TRUE	TRUE	TRUE	3.98757	loop_1255	120000	11.5417	27	0.752724	-0.298121	-1.05085	0.00779392	TRUE	FALSE	TRUE	11	16	11	18	10	12	10	8	27	18	24	17	12	6	12	8	3	2	3	7	16	9	9	8
chr1	153510000	153520000	10001	*	chr1	153740000	153750000	10001	*	TRUE	FALSE	TRUE	TRUE	3.91522	loop_1256	240000	4.66667	9	0.105042	0.279611	0.17457	0.892843	FALSE	FALSE	FALSE	7	6	9	5	4	8	1	2	5	8	5	3	3	5	4	1	4	1	3	3	6	6	9	4
chr1	153530000	153540000	10001	*	chr1	153560000	153570000	10001	*	TRUE	TRUE	TRUE	TRUE	3.07001	loop_1257	40000	30.25	55	0.848248	-0.537851	-1.3861	1.14645e-11	TRUE	FALSE	TRUE	36	22	32	40	28	36	29	30	51	49	55	54	44	34	25	28	9	5	7	14	23	20	31	24
chr1	153570000	153580000	10001	*	chr1	153750000	153760000	10001	*	FALSE	FALSE	TRUE	TRUE	3.21028	loop_1258	190000	4.29167	10	0.421947	0.495468	0.0735217	0.684084	FALSE	FALSE	FALSE	3	6	5	4	5	2	4	4	5	5	2	2	4	5	5	5	3	5	2	1	10	5	5	6
chr1	153670000	153680000	10001	*	chr1	153740000	153750000	10001	*	TRUE	TRUE	TRUE	TRUE	5.48244	loop_1259	80000	18.4167	32	0.163702	-0.200348	-0.36405	0.523618	FALSE	FALSE	FALSE	30	22	28	30	18	12	17	23	23	32	20	21	14	17	11	12	12	6	6	13	21	14	20	20
chr1	153670000	153680000	10001	*	chr1	153980000	153990000	10001	*	TRUE	FALSE	TRUE	TRUE	4.12075	loop_1260	320000	3.91667	8	0.000271388	-0.303999	-0.304271	0.878855	FALSE	FALSE	FALSE	3	8	5	8	5	4	4	3	7	5	3	4	3	2	4	2	3	2	1	0	3	3	6	6
chr1	153790000	153800000	10001	*	chr1	153980000	153990000	10001	*	FALSE	TRUE	TRUE	TRUE	5.86909	loop_1261	200000	10.875	18	0.316732	0.172061	-0.144671	0.712464	FALSE	FALSE	FALSE	12	12	11	14	11	8	18	9	13	15	14	12	8	8	10	9	4	11	8	9	14	13	10	8
chr1	153820000	153830000	10001	*	chr1	153910000	153920000	10001	*	TRUE	TRUE	TRUE	TRUE	2.5086	loop_1262	100000	9.66667	20	-0.100442	-0.110953	-0.0105113	0.957129	FALSE	FALSE	FALSE	16	12	16	20	7	10	10	8	16	9	9	13	7	2	11	3	7	10	3	5	16	8	5	9
chr1	153990000	154000000	10001	*	chr1	154160000	154170000	10001	*	TRUE	FALSE	FALSE	FALSE	2.89806	loop_1263	180000	4.29167	11	-0.322267	-0.54507	-0.222803	0.710404	FALSE	FALSE	FALSE	11	8	6	8	6	5	2	3	7	7	5	6	1	1	3	0	1	0	2	0	9	2	4	6
chr1	154020000	154030000	10001	*	chr1	154100000	154110000	10001	*	FALSE	TRUE	FALSE	TRUE	2.33991	loop_1264	90000	5.95833	13	0.131878	0.0330019	-0.0988758	0.967521	FALSE	FALSE	FALSE	10	8	6	8	5	5	2	10	6	7	4	5	9	3	5	5	2	2	3	1	13	7	12	5
chr1	154180000	154190000	10001	*	chr1	154230000	154240000	10001	*	FALSE	FALSE	TRUE	FALSE	2.05418	loop_1265	60000	8.33333	15	-0.226271	0.0277941	0.254065	0.846413	FALSE	FALSE	FALSE	14	11	10	9	7	12	11	9	11	10	8	12	2	1	4	6	5	2	7	2	11	15	11	10
chr1	154400000	154410000	10001	*	chr1	154470000	154480000	10001	*	FALSE	FALSE	TRUE	TRUE	2.6557	loop_1266	80000	10.5417	21	-0.209453	-0.0929131	0.11654	0.864729	FALSE	FALSE	FALSE	21	17	13	16	10	11	10	11	8	8	10	7	6	12	7	11	7	5	8	6	13	12	11	13
chr1	154480000	154490000	10001	*	chr1	154540000	154550000	10001	*	TRUE	TRUE	TRUE	TRUE	3.79574	loop_1267	70000	13.7917	24	-0.0863289	-0.372441	-0.286112	0.5557	FALSE	FALSE	FALSE	24	23	23	18	12	19	13	14	15	15	14	19	11	10	10	8	6	8	3	5	12	17	14	18
chr1	154480000	154490000	10001	*	chr1	154870000	154880000	10001	*	FALSE	FALSE	TRUE	FALSE	3.03351	loop_1268	400000	3.875	7	0.188841	0.174365	-0.0144763	0.94673	FALSE	FALSE	FALSE	3	2	6	4	7	5	5	2	3	1	4	7	4	3	4	3	3	1	4	3	6	2	6	5
chr1	154550000	154560000	10001	*	chr1	155060000	155070000	10001	*	FALSE	FALSE	FALSE	TRUE	2.99053	loop_1269	520000	2.375	9	0.00994338	0.632254	0.62231	0.700242	FALSE	FALSE	FALSE	2	1	2	3	1	4	1	5	2	4	2	2	0	1	1	2	1	1	2	0	3	4	9	4
chr1	154560000	154570000	10001	*	chr1	154660000	154670000	10001	*	FALSE	FALSE	FALSE	TRUE	2.38306	loop_1270	110000	6.20833	10	0.672771	0.793331	0.12056	0.235863	FALSE	FALSE	FALSE	10	8	4	8	4	3	3	4	7	9	4	6	6	6	6	7	7	2	7	4	10	10	8	6
chr1	154560000	154570000	10001	*	chr1	154880000	154890000	10001	*	TRUE	FALSE	FALSE	TRUE	3.51978	loop_1271	330000	5.5	16	0.144397	0.357475	0.213078	0.826673	FALSE	FALSE	FALSE	16	8	9	5	3	3	4	2	9	7	4	6	3	1	8	2	2	5	5	1	10	4	5	10
chr1	154560000	154570000	10001	*	chr1	154940000	154950000	10001	*	TRUE	FALSE	FALSE	FALSE	3.70639	loop_1272	390000	4.375	9	-0.143942	0.126412	0.270354	0.915678	FALSE	FALSE	FALSE	6	3	5	3	4	5	9	7	6	4	5	6	3	2	2	1	3	3	2	5	5	5	4	7
chr1	154670000	154680000	10001	*	chr1	154750000	154760000	10001	*	TRUE	FALSE	TRUE	TRUE	2.30464	loop_1273	90000	4.70833	10	0.258738	0.198168	-0.0605699	0.898151	FALSE	FALSE	FALSE	10	9	5	7	3	2	4	3	8	4	5	2	5	4	5	4	1	5	3	6	4	2	6	6
chr1	154670000	154680000	10001	*	chr1	154880000	154890000	10001	*	TRUE	TRUE	TRUE	TRUE	4.04214	loop_1274	220000	4.5	9	0.492303	0.321296	-0.171007	0.692916	FALSE	FALSE	FALSE	6	2	9	5	3	3	5	4	6	6	9	3	4	3	5	3	2	5	3	3	6	4	4	5
chr1	154670000	154680000	10001	*	chr1	155070000	155080000	10001	*	FALSE	TRUE	FALSE	TRUE	4.08782	loop_1275	410000	1.79167	5	0.710697	0.269349	-0.441348	0.762563	FALSE	FALSE	FALSE	1	3	3	3	0	2	0	2	5	3	1	3	0	0	1	4	0	0	1	1	3	2	1	4
chr1	154760000	154770000	10001	*	chr1	154870000	154880000	10001	*	TRUE	TRUE	FALSE	FALSE	2.2992	loop_1276	120000	8.16667	16	0.154386	0.061881	-0.0925052	0.940922	FALSE	FALSE	FALSE	16	13	14	11	6	4	4	9	8	9	9	11	6	4	12	4	5	5	6	3	14	7	10	6
chr1	154960000	154970000	10001	*	chr1	154990000	155000000	10001	*	FALSE	TRUE	FALSE	FALSE	2.51556	loop_1277	40000	14.9167	25	0.255453	-0.10409	-0.359543	0.62101	FALSE	FALSE	FALSE	14	20	13	19	20	19	19	14	22	19	16	23	19	6	8	13	7	10	7	13	14	8	25	10
chr1	154960000	154970000	10001	*	chr1	155050000	155060000	10001	*	TRUE	FALSE	TRUE	TRUE	3.62182	loop_1278	100000	9.25	19	0.230764	0.0425271	-0.188236	0.855194	FALSE	FALSE	FALSE	9	14	13	8	12	11	8	9	10	9	8	19	7	5	9	7	8	3	10	2	16	11	6	8
chr1	155090000	155100000	10001	*	chr1	155160000	155170000	10001	*	TRUE	TRUE	TRUE	TRUE	9.26481	loop_1279	80000	25.2083	39	-0.146901	-0.0896705	0.0572307	0.853583	FALSE	FALSE	FALSE	39	31	31	36	32	29	19	38	31	29	31	34	14	10	12	14	10	16	13	14	32	30	32	28
chr1	155200000	155210000	10001	*	chr1	155240000	155250000	10001	*	FALSE	FALSE	TRUE	FALSE	2.44125	loop_1280	50000	7.75	13	0.300912	0.45281	0.151898	0.610938	FALSE	FALSE	FALSE	13	8	5	9	10	2	11	6	9	10	4	12	7	5	4	8	8	7	4	6	11	11	8	8
chr1	155250000	155260000	10001	*	chr1	155590000	155600000	10001	*	FALSE	TRUE	TRUE	TRUE	4.42807	loop_1281	350000	4.91667	9	0.306186	0.182445	-0.123741	0.861202	FALSE	FALSE	FALSE	9	6	6	6	5	5	3	3	6	9	8	5	5	4	2	1	2	3	0	4	7	5	5	9
chr1	155270000	155280000	10001	*	chr1	155320000	155330000	10001	*	TRUE	TRUE	TRUE	TRUE	3.22912	loop_1282	60000	11	21	0.244661	-0.461347	-0.706008	0.216656	FALSE	FALSE	FALSE	13	7	13	13	21	11	12	18	14	14	19	11	9	7	11	10	3	3	6	6	12	10	10	11
chr1	155320000	155330000	10001	*	chr1	155590000	155600000	10001	*	TRUE	TRUE	TRUE	TRUE	3.16264	loop_1283	280000	4.875	9	-0.126147	0.14603	0.272177	0.904917	FALSE	FALSE	FALSE	9	5	5	7	5	4	3	9	8	4	3	3	4	1	4	5	2	3	5	3	8	9	4	4
chr1	155680000	155690000	10001	*	chr1	155720000	155730000	10001	*	FALSE	FALSE	TRUE	TRUE	2.38129	loop_1284	50000	8.5	21	-0.251924	0.636201	0.888125	0.122221	FALSE	FALSE	FALSE	9	7	6	14	11	11	8	6	7	5	6	10	2	8	4	3	5	4	6	11	17	5	18	21
chr1	155930000	155940000	10001	*	chr1	155980000	155990000	10001	*	TRUE	TRUE	TRUE	TRUE	3.08587	loop_1285	60000	15.2917	28	0.0661899	0.143758	0.0775683	0.921302	FALSE	FALSE	FALSE	28	22	22	25	7	15	13	11	14	13	24	14	5	13	16	11	8	9	6	8	15	28	13	27
chr1	155930000	155940000	10001	*	chr1	156060000	156070000	10001	*	FALSE	TRUE	TRUE	TRUE	4.0087	loop_1286	140000	7.79167	16	0.282422	0.605647	0.323225	0.438136	FALSE	FALSE	FALSE	11	7	7	9	8	2	13	4	8	4	6	6	7	9	12	3	6	3	4	8	11	16	11	12
chr1	156010000	156020000	10001	*	chr1	156060000	156070000	10001	*	FALSE	FALSE	TRUE	TRUE	2.17465	loop_1287	60000	9.79167	17	-0.151355	0.26423	0.415585	0.622035	FALSE	FALSE	FALSE	13	9	15	12	8	14	6	15	8	12	8	11	8	6	6	3	12	4	7	6	14	8	13	17
chr1	156090000	156100000	10001	*	chr1	156130000	156140000	10001	*	TRUE	TRUE	TRUE	TRUE	3.50635	loop_1288	50000	23.4583	41	0.100417	-0.55129	-0.651707	0.0436052	FALSE	FALSE	FALSE	34	27	30	23	41	31	29	26	30	24	37	30	26	15	13	18	9	7	8	7	27	22	22	27
chr1	156090000	156100000	10001	*	chr1	156220000	156230000	10001	*	TRUE	TRUE	TRUE	TRUE	5.91732	loop_1289	140000	14.5833	24	0.339868	0.257336	-0.0825315	0.569779	FALSE	FALSE	FALSE	16	21	14	24	11	15	13	10	23	20	12	19	12	14	11	6	6	5	9	9	19	18	24	19
chr1	156140000	156150000	10001	*	chr1	156220000	156230000	10001	*	TRUE	TRUE	TRUE	TRUE	4.04594	loop_1290	90000	15.9167	26	0.320563	-0.055956	-0.376519	0.447574	FALSE	FALSE	FALSE	19	14	10	25	15	23	16	21	18	21	17	19	12	16	15	13	7	7	6	7	18	18	19	26
chr1	156140000	156150000	10001	*	chr1	156310000	156320000	10001	*	FALSE	FALSE	TRUE	TRUE	2.42965	loop_1291	180000	4.20833	10	0.567076	0.471087	-0.0959887	0.636138	FALSE	FALSE	FALSE	1	4	4	6	3	2	6	6	6	6	8	2	5	4	2	2	4	1	2	3	6	6	2	10
chr1	156280000	156290000	10001	*	chr1	156310000	156320000	10001	*	TRUE	TRUE	TRUE	TRUE	2.21236	loop_1292	40000	14.375	23	0.240441	0.221806	-0.0186355	0.73133	FALSE	FALSE	FALSE	20	19	15	16	15	12	18	10	13	22	15	12	12	10	16	10	11	5	6	10	15	22	18	23
chr1	156380000	156390000	10001	*	chr1	156440000	156450000	10001	*	TRUE	TRUE	TRUE	TRUE	4.74297	loop_1293	70000	31.9167	60	-0.526152	0.0357724	0.561924	0.0401544	FALSE	FALSE	FALSE	60	33	37	48	35	50	36	38	34	28	33	30	15	19	14	7	30	28	23	15	50	34	35	34
chr1	156380000	156390000	10001	*	chr1	156600000	156610000	10001	*	TRUE	TRUE	TRUE	TRUE	3.33452	loop_1294	230000	5.79167	13	0.217533	0.209328	-0.00820481	0.892936	FALSE	FALSE	FALSE	13	4	6	9	4	6	5	5	12	8	5	7	3	3	4	4	6	8	1	3	8	5	5	5
chr1	156450000	156460000	10001	*	chr1	156570000	156580000	10001	*	FALSE	TRUE	TRUE	TRUE	2.76855	loop_1295	130000	9.75	15	0.508126	0.021059	-0.487067	0.346631	FALSE	FALSE	FALSE	14	9	11	7	9	12	10	11	13	15	15	9	8	10	14	5	3	9	5	7	10	12	6	10
chr1	156680000	156690000	10001	*	chr1	156880000	156890000	10001	*	FALSE	FALSE	TRUE	TRUE	3.80218	loop_1296	210000	6.75	12	0.0497503	0.139083	0.0893324	0.961861	FALSE	FALSE	FALSE	10	7	3	6	8	12	7	9	10	10	1	9	5	5	3	6	6	8	2	6	4	11	3	11
chr1	156720000	156730000	10001	*	chr1	156880000	156890000	10001	*	TRUE	TRUE	FALSE	TRUE	2.86312	loop_1297	170000	6.66667	12	-0.592225	-0.0564725	0.535753	0.489083	FALSE	FALSE	FALSE	5	11	8	9	12	11	6	10	8	1	3	8	3	4	6	3	10	5	2	4	10	5	9	7
chr1	156790000	156800000	10001	*	chr1	156880000	156890000	10001	*	FALSE	TRUE	TRUE	TRUE	2.68733	loop_1298	100000	13.5833	21	0.204259	-0.0334808	-0.23774	0.785385	FALSE	FALSE	FALSE	21	20	14	11	15	15	15	16	11	19	20	17	10	11	13	9	13	12	7	6	12	8	10	21
chr1	156890000	156900000	10001	*	chr1	156920000	156930000	10001	*	TRUE	FALSE	TRUE	TRUE	2.62011	loop_1299	40000	21.0833	39	-0.0159159	-0.381997	-0.366081	0.393415	FALSE	FALSE	FALSE	24	23	23	32	23	23	32	39	25	28	25	31	16	14	14	11	15	9	10	12	17	22	24	14
chr1	157090000	157100000	10001	*	chr1	157150000	157160000	10001	*	TRUE	TRUE	TRUE	TRUE	6.98265	loop_1300	70000	27.5833	43	0.0279133	-0.0331592	-0.0610726	0.973458	FALSE	FALSE	FALSE	42	38	33	37	26	25	32	35	30	43	20	27	28	20	23	14	18	21	15	21	34	31	20	29
chr1	157190000	157200000	10001	*	chr1	157360000	157370000	10001	*	TRUE	TRUE	TRUE	TRUE	4.09235	loop_1301	180000	9	16	0.213547	0.0624177	-0.15113	0.871513	FALSE	FALSE	FALSE	16	10	9	14	6	7	9	12	16	10	11	14	7	2	8	5	5	6	4	8	10	11	8	8
chr1	157190000	157200000	10001	*	chr1	157490000	157500000	10001	*	TRUE	TRUE	TRUE	TRUE	7.19474	loop_1302	310000	13.4167	29	0.602656	0.333776	-0.26888	0.213905	FALSE	FALSE	FALSE	21	17	16	18	11	7	10	8	25	29	21	14	7	15	6	8	7	11	13	10	19	6	9	14
chr1	157210000	157220000	10001	*	chr1	157300000	157310000	10001	*	TRUE	TRUE	FALSE	FALSE	2.25429	loop_1303	100000	8.29167	17	0.358871	-0.274305	-0.633176	0.391467	FALSE	FALSE	FALSE	12	8	15	16	7	6	10	5	17	11	13	10	5	5	11	4	3	5	5	5	6	6	3	11
chr1	157370000	157380000	10001	*	chr1	157490000	157500000	10001	*	TRUE	TRUE	TRUE	TRUE	7.1822	loop_1304	130000	20.2083	41	-0.151115	-0.248172	-0.0970573	0.710434	FALSE	FALSE	FALSE	35	41	34	31	16	17	18	24	22	13	25	24	14	19	8	18	13	8	14	17	20	10	22	22
chr1	157570000	157580000	10001	*	chr1	157950000	157960000	10001	*	FALSE	FALSE	TRUE	TRUE	3.04075	loop_1305	390000	3.91667	9	-0.21517	0.990576	1.20575	0.120979	FALSE	FALSE	FALSE	8	9	3	5	1	4	2	1	5	5	3	2	2	2	1	1	6	2	5	4	3	7	6	7
chr1	157580000	157590000	10001	*	chr1	158120000	158130000	10001	*	FALSE	TRUE	TRUE	TRUE	3.58607	loop_1306	550000	3.5	8	0.993564	0.501044	-0.49252	0.352849	FALSE	FALSE	FALSE	6	5	2	7	1	2	2	0	4	3	4	6	2	5	8	3	2	5	2	1	1	5	5	3
chr1	157880000	157890000	10001	*	chr1	158120000	158130000	10001	*	TRUE	TRUE	FALSE	TRUE	3.48932	loop_1307	250000	6.45833	14	-0.403043	-0.159775	0.243269	0.74554	FALSE	FALSE	FALSE	5	14	9	11	10	9	3	9	3	8	10	6	1	7	5	1	6	4	6	3	6	9	7	3
chr1	157960000	157970000	10001	*	chr1	158120000	158130000	10001	*	TRUE	FALSE	TRUE	FALSE	9.43489	loop_1308	170000	25.7083	43	-0.218283	-0.0546705	0.163612	0.762549	FALSE	FALSE	FALSE	32	24	29	41	29	35	30	43	27	26	33	33	17	20	9	10	24	21	15	25	18	22	23	31
chr1	157990000	158000000	10001	*	chr1	158030000	158040000	10001	*	TRUE	TRUE	TRUE	TRUE	2.75915	loop_1309	50000	32.7083	56	-0.279705	-0.160004	0.119701	0.517208	FALSE	FALSE	FALSE	56	48	53	49	33	35	38	38	46	33	34	35	19	19	11	23	26	21	38	17	25	20	32	36
chr1	157990000	158000000	10001	*	chr1	158080000	158090000	10001	*	FALSE	TRUE	TRUE	TRUE	5.45043	loop_1310	100000	22.9167	39	0.322753	0.142341	-0.180412	0.535772	FALSE	FALSE	FALSE	26	23	31	23	27	21	25	25	20	39	22	37	20	22	17	13	22	10	18	17	24	23	27	18
chr1	158200000	158210000	10001	*	chr1	158520000	158530000	10001	*	TRUE	FALSE	TRUE	TRUE	4.01592	loop_1311	330000	6.875	25	-0.498923	-0.006433	0.49249	0.596843	FALSE	FALSE	FALSE	5	11	25	17	7	4	3	6	2	10	5	7	4	1	5	5	6	7	6	4	9	3	6	7
chr1	158200000	158210000	10001	*	chr1	158990000	159000000	10001	*	TRUE	FALSE	FALSE	TRUE	3.53778	loop_1312	800000	5	15	-0.191707	0.456788	0.648495	0.560747	FALSE	FALSE	FALSE	7	13	8	15	0	2	1	4	5	4	5	6	1	2	5	2	2	5	4	6	4	2	7	10
chr1	158200000	158210000	10001	*	chr1	159070000	159080000	10001	*	FALSE	TRUE	TRUE	TRUE	4.45948	loop_1313	880000	4.20833	8	0.914838	1.06203	0.147193	0.212724	FALSE	FALSE	FALSE	7	5	6	4	1	5	0	0	5	7	2	8	6	2	5	2	6	6	1	6	2	4	6	5
chr1	158500000	158510000	10001	*	chr1	159070000	159080000	10001	*	TRUE	FALSE	TRUE	TRUE	3.47673	loop_1314	580000	3.83333	11	-0.810243	-0.236315	0.573928	0.5008	FALSE	FALSE	FALSE	10	7	11	7	7	1	1	3	2	2	2	2	6	1	2	2	3	4	2	2	3	3	6	3
chr1	158790000	158800000	10001	*	chr1	159070000	159080000	10001	*	FALSE	FALSE	FALSE	TRUE	2.96302	loop_1315	290000	4.41667	11	-0.0892227	-0.473816	-0.384594	0.755152	FALSE	FALSE	FALSE	4	9	11	7	2	7	6	3	5	4	9	4	4	4	3	1	3	3	1	5	0	4	6	1
chr1	158800000	158810000	10001	*	chr1	158990000	159000000	10001	*	TRUE	FALSE	FALSE	TRUE	2.88843	loop_1316	200000	5.625	18	-0.872555	-1.22813	-0.35557	0.0562247	FALSE	FALSE	FALSE	18	5	14	11	4	8	11	8	3	7	5	4	3	2	6	2	0	3	1	4	7	5	1	3
chr1	159130000	159140000	10001	*	chr1	159210000	159220000	10001	*	FALSE	FALSE	TRUE	FALSE	2.86073	loop_1317	90000	12.25	20	-0.0244715	0.280982	0.305453	0.676511	FALSE	FALSE	FALSE	16	11	16	10	10	15	14	20	9	9	11	16	6	12	9	10	7	10	15	8	14	17	12	17
chr1	159150000	159160000	10001	*	chr1	159770000	159780000	10001	*	TRUE	TRUE	FALSE	TRUE	5.11709	loop_1318	630000	6.58333	20	0.117731	-1.54215	-1.65988	0.00509777	FALSE	TRUE	TRUE	10	15	20	13	7	4	5	4	13	8	10	7	7	7	7	3	3	0	2	1	6	1	1	4
chr1	159150000	159160000	10001	*	chr1	159890000	159900000	10001	*	TRUE	TRUE	FALSE	TRUE	4.41458	loop_1319	750000	5.45833	16	0.180639	-1.47063	-1.65127	0.0149651	FALSE	TRUE	TRUE	16	9	6	12	5	4	6	5	8	12	7	9	3	6	2	6	1	0	4	1	2	2	2	3
chr1	159160000	159170000	10001	*	chr1	159190000	159200000	10001	*	TRUE	FALSE	FALSE	TRUE	3.45676	loop_1320	40000	25.4583	45	-0.176276	-0.138475	0.0378015	0.773151	FALSE	FALSE	FALSE	42	34	45	34	32	33	21	24	34	28	27	23	18	19	18	10	12	13	29	15	23	24	24	29
chr1	159160000	159170000	10001	*	chr1	159200000	159210000	10001	*	FALSE	TRUE	FALSE	FALSE	2.18628	loop_1321	50000	21.0417	35	0.224245	-0.413709	-0.637954	0.0980336	FALSE	FALSE	FALSE	30	28	33	35	12	31	18	24	34	23	20	25	23	15	21	21	15	15	10	9	20	9	13	21
chr1	159210000	159220000	10001	*	chr1	159770000	159780000	10001	*	TRUE	TRUE	FALSE	TRUE	3.94411	loop_1322	570000	9.45833	21	0.267492	-1.29593	-1.56342	0.000749287	FALSE	TRUE	TRUE	21	19	13	17	6	13	7	9	19	16	13	15	5	12	5	9	3	6	3	3	7	3	3	0
chr1	159420000	159430000	10001	*	chr1	159760000	159770000	10001	*	FALSE	TRUE	FALSE	FALSE	3.27177	loop_1323	350000	3.625	12	0.938346	-0.396441	-1.33479	0.12685	FALSE	FALSE	FALSE	3	12	3	2	3	4	2	1	11	11	7	4	3	3	3	1	3	2	0	2	2	3	1	1
chr1	159790000	159800000	10001	*	chr1	159890000	159900000	10001	*	TRUE	TRUE	TRUE	TRUE	10.7881	loop_1324	110000	29.4167	45	-0.0400309	0.0388664	0.0788972	0.953814	FALSE	FALSE	FALSE	38	42	42	45	40	27	28	26	45	34	32	25	23	18	21	15	25	20	23	25	28	31	26	27
chr1	159790000	159800000	10001	*	chr1	160000000	160010000	10001	*	TRUE	TRUE	TRUE	TRUE	4.57881	loop_1325	220000	7.83333	14	-0.0743582	0.903488	0.977846	0.0345357	FALSE	FALSE	FALSE	9	8	9	11	9	4	4	8	14	4	10	6	2	2	6	2	10	3	12	8	13	10	10	14
chr1	159930000	159940000	10001	*	chr1	160000000	160010000	10001	*	TRUE	TRUE	TRUE	TRUE	8.51915	loop_1326	80000	37.0833	60	-0.265005	-0.09837	0.166635	0.577001	FALSE	FALSE	FALSE	60	39	58	46	46	50	40	46	51	48	42	35	18	23	15	20	33	34	23	29	42	22	29	41
chr1	160040000	160050000	10001	*	chr1	160080000	160090000	10001	*	TRUE	FALSE	FALSE	TRUE	2.40622	loop_1327	50000	15.7917	28	-0.083893	-0.30718	-0.223287	0.661472	FALSE	FALSE	FALSE	19	25	22	28	17	23	18	13	19	24	28	16	6	8	13	6	11	7	6	9	19	18	10	14
chr1	160100000	160110000	10001	*	chr1	160210000	160220000	10001	*	FALSE	TRUE	TRUE	TRUE	2.44151	loop_1328	120000	12.7083	22	0.376705	0.296358	-0.0803466	0.536853	FALSE	FALSE	FALSE	17	13	20	6	12	13	14	11	22	14	20	10	9	11	10	8	15	7	5	6	16	13	16	17
chr1	160100000	160110000	10001	*	chr1	160250000	160260000	10001	*	TRUE	TRUE	TRUE	TRUE	4.25087	loop_1329	160000	12.0417	22	0.248893	0.522103	0.27321	0.378054	FALSE	FALSE	FALSE	13	22	18	10	6	9	12	10	21	14	18	14	10	8	5	2	14	6	8	13	20	11	11	14
chr1	160170000	160180000	10001	*	chr1	160590000	160600000	10001	*	FALSE	FALSE	TRUE	FALSE	2.91908	loop_1330	430000	1.54167	4	-0.151801	1.91444	2.06624	0.0385833	FALSE	FALSE	FALSE	2	1	0	2	0	1	1	2	1	2	0	0	1	1	0	1	3	2	4	3	3	3	2	2
chr1	160190000	160200000	10001	*	chr1	160290000	160300000	10001	*	TRUE	TRUE	TRUE	TRUE	3.41667	loop_1331	110000	13.2083	21	-0.266668	0.0861436	0.352812	0.675158	FALSE	FALSE	FALSE	21	9	15	20	17	20	12	18	19	14	14	16	11	4	5	4	12	19	7	9	14	10	16	11
chr1	160420000	160430000	10001	*	chr1	160600000	160610000	10001	*	TRUE	TRUE	TRUE	TRUE	5.97002	loop_1332	190000	16.375	34	-0.294934	-0.321875	-0.026941	0.558429	FALSE	FALSE	FALSE	30	27	16	34	16	17	28	13	11	21	18	23	7	10	12	10	12	14	10	10	14	15	7	18
chr1	160720000	160730000	10001	*	chr1	160830000	160840000	10001	*	TRUE	TRUE	TRUE	TRUE	3.0698	loop_1333	120000	14.5833	30	0.00276583	0.240399	0.237633	0.761762	FALSE	FALSE	FALSE	30	23	23	14	6	8	20	14	13	17	13	16	14	13	7	8	13	10	9	15	10	14	21	19
chr1	160720000	160730000	10001	*	chr1	160950000	160960000	10001	*	TRUE	TRUE	TRUE	TRUE	3.99255	loop_1334	240000	10.3333	17	0.154771	0.510558	0.355787	0.404046	FALSE	FALSE	FALSE	13	15	17	16	6	6	10	7	14	15	12	10	4	8	6	6	13	6	10	11	10	12	10	11
chr1	160830000	160840000	10001	*	chr1	160950000	160960000	10001	*	TRUE	TRUE	TRUE	TRUE	4.5572	loop_1335	130000	16.9583	30	-0.227101	-0.201501	0.0256	0.745355	FALSE	FALSE	FALSE	30	19	24	30	18	21	21	17	27	15	10	23	9	10	13	10	13	18	7	12	19	20	8	13
chr1	160990000	161000000	10001	*	chr1	161090000	161100000	10001	*	TRUE	FALSE	FALSE	FALSE	3.38682	loop_1336	110000	12.5	26	0.44876	0.0788609	-0.3699	0.438079	FALSE	FALSE	FALSE	11	19	17	9	10	15	11	15	26	11	20	14	8	8	9	15	9	8	5	10	18	9	14	9
chr1	161020000	161030000	10001	*	chr1	161090000	161100000	10001	*	FALSE	FALSE	TRUE	FALSE	2.88372	loop_1337	80000	8.70833	18	-0.233807	0.446133	0.67994	0.304925	FALSE	FALSE	FALSE	7	13	11	6	7	14	13	8	8	4	7	9	6	7	3	6	7	7	5	12	12	8	11	18
chr1	161180000	161190000	10001	*	chr1	161740000	161750000	10001	*	FALSE	TRUE	FALSE	FALSE	4.75319	loop_1338	570000	1.45833	4	1.03088	0.378953	-0.651924	0.605843	FALSE	FALSE	FALSE	0	2	1	3	1	2	1	0	3	3	1	4	3	0	0	2	2	0	0	2	1	2	1	1
chr1	161210000	161220000	10001	*	chr1	161740000	161750000	10001	*	FALSE	FALSE	FALSE	TRUE	3.8625	loop_1339	540000	1.58333	5	0.659941	0.84809	0.188149	0.692362	FALSE	FALSE	FALSE	1	2	2	0	1	1	1	3	1	2	2	2	1	2	2	1	1	5	0	2	0	1	3	2
chr1	161220000	161230000	10001	*	chr1	161380000	161390000	10001	*	TRUE	TRUE	TRUE	TRUE	5.80019	loop_1340	170000	12.1667	23	-0.0945371	0.0135421	0.108079	0.953832	FALSE	FALSE	FALSE	12	13	18	23	17	12	16	9	14	9	16	15	9	5	8	9	13	6	9	6	13	13	12	15
chr1	161220000	161230000	10001	*	chr1	161290000	161300000	10001	*	TRUE	TRUE	TRUE	TRUE	2.93013	loop_1341	80000	13.3333	23	-0.128334	0.0588577	0.187192	0.880469	FALSE	FALSE	FALSE	11	18	14	20	23	15	18	11	10	18	9	12	9	11	9	11	11	11	6	10	18	16	18	11
chr1	161290000	161300000	10001	*	chr1	161370000	161380000	10001	*	TRUE	TRUE	FALSE	TRUE	2.3841	loop_1342	90000	8.45833	18	0.0386818	0.129834	0.0911523	0.959281	FALSE	FALSE	FALSE	15	16	18	14	6	2	4	8	12	15	6	8	3	4	9	5	7	5	6	6	12	5	7	10
chr1	161680000	161690000	10001	*	chr1	161710000	161720000	10001	*	FALSE	TRUE	FALSE	FALSE	3.77324	loop_1343	40000	16.5	35	0.173909	0.246115	0.0722068	0.745133	FALSE	FALSE	FALSE	33	21	29	18	14	14	9	11	35	19	16	13	13	10	8	12	6	11	13	10	22	20	17	22
chr1	161790000	161800000	10001	*	chr1	161900000	161910000	10001	*	FALSE	FALSE	TRUE	TRUE	3.52923	loop_1344	120000	9.20833	21	0.0184645	0.507739	0.489275	0.422887	FALSE	FALSE	FALSE	21	7	9	21	8	6	3	8	9	12	11	8	8	6	3	4	6	6	12	8	15	7	14	9
chr1	161790000	161800000	10001	*	chr1	162030000	162040000	10001	*	TRUE	TRUE	TRUE	TRUE	11.9993	loop_1345	250000	26.25	52	0.317764	0.102636	-0.215128	0.476264	FALSE	FALSE	FALSE	30	49	33	52	16	18	18	22	35	35	21	39	25	22	24	15	23	18	11	9	31	24	27	33
chr1	161790000	161800000	10001	*	chr1	162270000	162280000	10001	*	FALSE	TRUE	TRUE	TRUE	3.8231	loop_1346	490000	4	9	-0.856683	-0.430289	0.426394	0.457974	FALSE	FALSE	FALSE	8	8	7	4	5	4	3	9	1	2	9	6	0	0	2	2	1	1	1	5	4	5	6	3
chr1	161860000	161870000	10001	*	chr1	162020000	162030000	10001	*	FALSE	FALSE	FALSE	TRUE	3.14057	loop_1347	170000	8.66667	20	-0.0796598	-0.218404	-0.138744	0.889359	FALSE	FALSE	FALSE	20	19	13	15	5	5	6	8	14	9	12	4	7	3	9	6	5	3	7	4	11	5	11	7
chr1	161890000	161900000	10001	*	chr1	162020000	162030000	10001	*	FALSE	TRUE	FALSE	FALSE	3.23156	loop_1348	140000	9.16667	18	0.467577	0.221351	-0.246227	0.531609	FALSE	FALSE	FALSE	18	8	16	17	3	6	4	8	14	10	13	14	10	7	9	3	7	4	7	9	6	9	6	12
chr1	162050000	162060000	10001	*	chr1	162270000	162280000	10001	*	TRUE	TRUE	TRUE	TRUE	6.7846	loop_1349	230000	20.375	40	0.0780326	0.199651	0.121619	0.786941	FALSE	FALSE	FALSE	34	28	28	40	13	18	16	15	23	22	26	20	16	12	14	16	17	13	17	18	31	20	16	16
chr1	162050000	162060000	10001	*	chr1	162390000	162400000	10001	*	TRUE	TRUE	FALSE	TRUE	5.26965	loop_1350	350000	10.9583	21	0.303458	-0.0844138	-0.387872	0.596764	FALSE	FALSE	FALSE	12	20	16	13	11	12	11	6	14	16	16	21	10	3	7	8	7	3	4	9	13	11	9	11
chr1	162050000	162060000	10001	*	chr1	162800000	162810000	10001	*	FALSE	FALSE	FALSE	TRUE	2.93982	loop_1351	760000	0.458333	2	0.325119	1.19674	0.871623	0.76327	FALSE	FALSE	FALSE	1	0	0	0	0	0	0	2	2	0	0	1	0	0	0	0	1	1	0	0	0	0	2	1
chr1	162090000	162100000	10001	*	chr1	162220000	162230000	10001	*	TRUE	FALSE	FALSE	FALSE	2.39974	loop_1352	140000	8.25	20	0.118491	-0.0653631	-0.183854	0.925477	FALSE	FALSE	FALSE	20	16	13	13	8	3	3	6	11	14	9	10	6	4	5	6	5	7	2	3	10	10	10	4
chr1	162180000	162190000	10001	*	chr1	162800000	162810000	10001	*	FALSE	FALSE	TRUE	FALSE	4.02538	loop_1353	630000	0.416667	2	1.1496	2.029	0.879404	0.472221	FALSE	FALSE	FALSE	0	0	0	0	0	1	0	0	0	0	0	1	0	1	0	1	0	1	1	0	1	1	2	0
chr1	162270000	162280000	10001	*	chr1	162390000	162400000	10001	*	FALSE	FALSE	FALSE	TRUE	2.29648	loop_1354	130000	8.20833	16	0.393551	0.223368	-0.170184	0.691694	FALSE	FALSE	FALSE	16	12	11	14	6	6	2	6	12	12	7	14	7	11	2	5	7	8	5	5	5	3	13	8
chr1	162350000	162360000	10001	*	chr1	162480000	162490000	10001	*	TRUE	FALSE	FALSE	FALSE	2.60019	loop_1355	140000	5.79167	18	-0.234254	-0.559234	-0.32498	0.60934	FALSE	FALSE	FALSE	11	9	8	18	5	3	2	12	9	8	6	6	2	2	4	5	3	5	4	2	3	3	5	4
chr1	162360000	162370000	10001	*	chr1	162790000	162800000	10001	*	FALSE	FALSE	TRUE	FALSE	3.75129	loop_1356	440000	0.75	3	0.669575	0.930892	0.261317	0.824561	FALSE	FALSE	FALSE	0	0	2	1	0	1	1	0	1	2	1	1	0	0	1	0	1	0	0	0	3	1	1	1
chr1	162500000	162510000	10001	*	chr1	162570000	162580000	10001	*	FALSE	FALSE	FALSE	TRUE	2.56764	loop_1357	80000	9.25	17	0.343301	0.448366	0.105065	0.560123	FALSE	FALSE	FALSE	9	15	16	15	3	8	3	10	14	10	14	16	3	8	4	5	7	9	9	4	3	17	11	9
chr1	162510000	162520000	10001	*	chr1	162800000	162810000	10001	*	TRUE	TRUE	TRUE	TRUE	3.68174	loop_1358	300000	1.33333	5	0.403569	0.657093	0.253524	0.854125	FALSE	FALSE	FALSE	5	2	0	2	0	0	1	1	0	2	0	1	1	2	0	4	1	2	2	0	2	1	2	1
chr1	162600000	162610000	10001	*	chr1	163320000	163330000	10001	*	FALSE	TRUE	FALSE	TRUE	3.70769	loop_1359	730000	2.375	5	0.716153	-0.256902	-0.973055	0.480789	FALSE	FALSE	FALSE	4	1	4	5	3	2	0	1	3	3	2	3	4	5	2	2	1	1	1	0	3	3	0	4
chr1	162610000	162620000	10001	*	chr1	162790000	162800000	10001	*	TRUE	TRUE	TRUE	TRUE	7.81228	loop_1360	190000	4.04167	10	0.253551	-0.231114	-0.484666	0.777962	FALSE	FALSE	FALSE	7	10	6	7	5	2	2	1	9	3	2	7	5	3	3	3	2	2	3	3	3	2	4	3
chr1	162680000	162690000	10001	*	chr1	162790000	162800000	10001	*	TRUE	TRUE	FALSE	FALSE	2.882	loop_1361	120000	1.33333	6	-0.110932	-0.415994	-0.305063	0.94613	FALSE	FALSE	FALSE	4	0	3	2	0	2	1	2	2	0	6	0	1	1	1	0	3	0	0	1	1	2	0	0
chr1	162840000	162850000	10001	*	chr1	163310000	163320000	10001	*	TRUE	TRUE	FALSE	TRUE	11.6304	loop_1362	480000	14.875	29	0.106854	-0.512731	-0.619585	0.184113	FALSE	FALSE	FALSE	21	28	29	28	11	17	12	11	20	14	24	17	12	13	17	8	5	8	9	9	14	6	17	7
chr1	162870000	162880000	10001	*	chr1	162990000	163000000	10001	*	FALSE	FALSE	TRUE	FALSE	2.43744	loop_1363	130000	7.25	14	-0.282496	0.773715	1.05621	0.0569905	FALSE	FALSE	FALSE	10	8	11	11	8	5	2	7	10	7	2	3	4	6	1	5	4	7	9	7	14	10	12	11
chr1	162870000	162880000	10001	*	chr1	163070000	163080000	10001	*	TRUE	TRUE	TRUE	TRUE	3.236	loop_1364	210000	9.16667	21	0.0277588	0.00589449	-0.0218643	0.998086	FALSE	FALSE	FALSE	18	19	21	13	3	6	6	7	9	10	12	17	8	3	5	5	4	9	6	6	12	11	5	5
chr1	162870000	162880000	10001	*	chr1	163170000	163180000	10001	*	TRUE	TRUE	TRUE	TRUE	6.55614	loop_1365	310000	20.1667	40	0.104936	0.06175	-0.0431858	0.935193	FALSE	FALSE	FALSE	27	30	40	34	19	18	11	14	33	23	24	24	14	14	10	13	11	12	19	9	26	20	14	25
chr1	162870000	162880000	10001	*	chr1	163310000	163320000	10001	*	FALSE	FALSE	TRUE	FALSE	5.87928	loop_1366	450000	14.25	27	0.21293	0.412545	0.199615	0.499412	FALSE	FALSE	FALSE	27	20	15	24	16	6	10	6	22	24	12	18	7	11	8	6	14	10	12	5	20	21	10	18
chr1	163070000	163080000	10001	*	chr1	163170000	163180000	10001	*	TRUE	TRUE	TRUE	TRUE	3.62519	loop_1367	110000	13.875	28	-0.144027	0.16358	0.307606	0.711237	FALSE	FALSE	FALSE	28	20	26	24	7	9	12	14	13	16	12	14	8	10	10	9	14	10	18	13	12	6	15	13
chr1	163070000	163080000	10001	*	chr1	163310000	163320000	10001	*	TRUE	FALSE	TRUE	TRUE	4.66769	loop_1368	250000	8.91667	20	-0.930243	0.589293	1.51954	0.00128604	TRUE	TRUE	TRUE	14	14	20	19	4	6	13	2	6	9	7	4	3	2	2	3	12	8	9	10	8	14	13	12
chr1	163170000	163180000	10001	*	chr1	163310000	163320000	10001	*	TRUE	TRUE	TRUE	TRUE	3.88734	loop_1369	150000	13.9167	28	-0.0244546	0.192359	0.216814	0.802905	FALSE	FALSE	FALSE	24	28	18	27	8	8	11	12	13	15	20	16	8	8	9	9	10	14	10	13	15	12	8	18
chr1	163400000	163410000	10001	*	chr1	164610000	164620000	10001	*	TRUE	TRUE	FALSE	TRUE	3.03711	loop_1370	1220000	3.16667	10	0.0127438	-0.796588	-0.809332	0.5308	FALSE	FALSE	FALSE	3	5	10	6	1	4	5	2	6	1	4	5	2	5	2	1	1	1	2	1	3	1	2	3
chr1	163400000	163410000	10001	*	chr1	165070000	165080000	10001	*	TRUE	TRUE	TRUE	TRUE	4.33899	loop_1371	1680000	5.45833	13	0.0919071	0.109758	0.0178512	0.977332	FALSE	FALSE	FALSE	8	5	7	13	4	6	2	7	8	5	8	5	6	1	5	3	0	4	5	7	6	6	7	3
chr1	163410000	163420000	10001	*	chr1	163520000	163530000	10001	*	FALSE	FALSE	FALSE	TRUE	2.63241	loop_1372	120000	8.54167	20	-0.449482	-0.0620654	0.387417	0.566082	FALSE	FALSE	FALSE	17	20	15	13	7	7	5	10	9	13	5	9	2	8	1	5	6	8	5	5	9	7	8	11
chr1	163520000	163530000	10001	*	chr1	165070000	165080000	10001	*	TRUE	TRUE	TRUE	TRUE	4.73969	loop_1373	1560000	5.54167	11	-0.0784048	0.275402	0.353807	0.805876	FALSE	FALSE	FALSE	9	10	9	5	5	8	1	5	6	3	5	5	4	6	6	1	4	3	3	5	5	11	8	6
chr1	163530000	163540000	10001	*	chr1	164100000	164110000	10001	*	FALSE	FALSE	TRUE	FALSE	2.53495	loop_1374	580000	2.95833	7	-0.584575	0.616936	1.20151	0.297555	FALSE	FALSE	FALSE	7	5	4	3	3	2	3	1	4	1	2	2	1	0	2	2	3	3	2	3	2	4	5	7
chr1	163530000	163540000	10001	*	chr1	164610000	164620000	10001	*	TRUE	TRUE	FALSE	TRUE	4.35428	loop_1375	1090000	5.04167	15	0.184204	-0.171653	-0.355857	0.843956	FALSE	FALSE	FALSE	15	7	6	8	4	3	4	3	12	9	7	5	3	3	1	3	3	2	3	4	6	3	1	6
chr1	163530000	163540000	10001	*	chr1	164790000	164800000	10001	*	TRUE	FALSE	FALSE	TRUE	3.194	loop_1376	1270000	3.83333	9	0.224702	-0.226716	-0.451418	0.811184	FALSE	FALSE	FALSE	8	9	7	3	1	2	5	3	7	6	6	4	2	3	3	2	1	4	2	1	3	3	2	5
chr1	164160000	164170000	10001	*	chr1	164790000	164800000	10001	*	FALSE	FALSE	TRUE	TRUE	3.67949	loop_1377	640000	3.25	13	-1.16033	1.79632	2.95665	1.44357e-05	TRUE	TRUE	TRUE	5	3	3	2	3	0	2	3	1	1	1	1	0	2	1	0	4	5	6	6	13	7	4	5
chr1	164160000	164170000	10001	*	chr1	165070000	165080000	10001	*	FALSE	FALSE	TRUE	TRUE	3.5953	loop_1378	920000	3	8	-1.41207	0.908956	2.32103	0.0114691	TRUE	TRUE	TRUE	5	3	4	6	2	3	4	1	1	2	0	2	3	0	0	0	5	2	6	2	6	8	2	5
chr1	164170000	164180000	10001	*	chr1	164550000	164560000	10001	*	FALSE	FALSE	TRUE	FALSE	2.20402	loop_1379	390000	2.66667	9	-1.00138	1.20305	2.20443	0.0213377	TRUE	TRUE	TRUE	7	4	3	3	0	1	2	2	0	2	2	0	2	1	0	1	4	3	1	4	3	9	7	3
chr1	164170000	164180000	10001	*	chr1	164610000	164620000	10001	*	TRUE	FALSE	TRUE	TRUE	3.26036	loop_1380	450000	3.83333	13	-1.00741	0.904386	1.91179	0.0220337	TRUE	TRUE	TRUE	3	6	8	6	3	5	1	2	5	4	1	2	0	0	0	1	2	3	2	4	7	8	6	13
chr1	164240000	164250000	10001	*	chr1	165070000	165080000	10001	*	TRUE	FALSE	FALSE	FALSE	2.51784	loop_1381	840000	2.79167	8	-1.05438	-0.187056	0.867325	0.440907	FALSE	FALSE	FALSE	8	4	7	5	0	2	3	5	2	0	3	3	1	3	0	0	3	1	0	1	4	6	4	2
chr1	164550000	164560000	10001	*	chr1	164610000	164620000	10001	*	FALSE	FALSE	TRUE	FALSE	2.35734	loop_1382	70000	9.41667	19	-0.034824	0.609981	0.644805	0.227288	FALSE	FALSE	FALSE	17	14	6	9	10	10	7	8	8	5	7	9	11	4	7	7	7	14	7	11	12	7	10	19
chr1	164560000	164570000	10001	*	chr1	164780000	164790000	10001	*	FALSE	TRUE	TRUE	TRUE	3.37739	loop_1383	230000	8.66667	16	0.503302	0.675365	0.172064	0.260825	FALSE	FALSE	FALSE	7	15	7	15	4	6	6	7	16	14	11	12	2	7	7	3	10	7	7	8	12	6	9	10
chr1	164610000	164620000	10001	*	chr1	165070000	165080000	10001	*	TRUE	TRUE	FALSE	TRUE	3.24672	loop_1384	470000	4.5	12	-0.290056	-0.585467	-0.295411	0.655871	FALSE	FALSE	FALSE	9	6	12	7	4	5	5	4	5	7	3	9	0	3	0	6	3	2	2	3	3	4	4	2
chr1	164620000	164630000	10001	*	chr1	164780000	164790000	10001	*	TRUE	TRUE	TRUE	TRUE	3.84418	loop_1385	170000	13.5417	25	0.132855	0.510413	0.377558	0.299005	FALSE	FALSE	FALSE	25	21	21	18	7	8	8	11	14	19	10	18	10	9	9	7	16	11	11	13	12	16	11	20
chr1	164700000	164710000	10001	*	chr1	164780000	164790000	10001	*	FALSE	TRUE	FALSE	FALSE	3.12037	loop_1386	90000	11.75	23	0.472131	-0.586626	-1.05876	0.0238426	FALSE	TRUE	TRUE	23	20	17	11	16	8	9	8	20	12	14	22	16	12	5	14	2	3	6	2	9	9	11	13
chr1	164790000	164800000	10001	*	chr1	165070000	165080000	10001	*	TRUE	TRUE	FALSE	TRUE	3.8641	loop_1387	290000	8.20833	16	0.33995	-0.0929349	-0.432884	0.623344	FALSE	FALSE	FALSE	15	15	12	12	5	4	3	11	16	14	12	11	6	3	7	4	2	2	8	7	7	7	3	11
chr1	165120000	165130000	10001	*	chr1	165590000	165600000	10001	*	FALSE	FALSE	TRUE	TRUE	3.73494	loop_1388	480000	3.66667	8	-0.287965	0.383387	0.671352	0.626282	FALSE	FALSE	FALSE	5	6	2	8	3	4	3	4	5	1	4	2	1	2	4	2	2	5	2	4	3	4	6	6
chr1	165140000	165150000	10001	*	chr1	165370000	165380000	10001	*	TRUE	FALSE	TRUE	TRUE	4.04167	loop_1389	240000	8.29167	19	-0.167354	1.39215	1.5595	8.03345e-06	FALSE	TRUE	TRUE	7	13	9	10	6	7	3	3	10	5	8	3	3	2	3	5	14	10	11	8	19	15	15	10
chr1	165150000	165160000	10001	*	chr1	165270000	165280000	10001	*	FALSE	FALSE	TRUE	FALSE	2.80369	loop_1390	130000	7.79167	14	0.143107	1.17942	1.03631	0.00420872	FALSE	TRUE	TRUE	7	11	6	10	6	3	6	7	6	11	7	9	2	5	5	2	9	9	8	14	14	12	9	9
chr1	165250000	165260000	10001	*	chr1	165370000	165380000	10001	*	TRUE	FALSE	FALSE	TRUE	3.45241	loop_1391	130000	10.375	20	-0.37304	-0.21063	0.16241	0.645473	FALSE	FALSE	FALSE	18	16	17	20	15	7	10	12	11	15	12	12	6	6	4	3	12	10	8	9	7	7	7	5
chr1	165260000	165270000	10001	*	chr1	165590000	165600000	10001	*	TRUE	FALSE	FALSE	TRUE	3.1882	loop_1392	340000	4.04167	9	0.303661	-0.361141	-0.664801	0.621116	FALSE	FALSE	FALSE	7	9	7	4	3	5	2	3	5	3	5	8	2	5	3	5	4	3	1	2	2	2	2	5
chr1	165380000	165390000	10001	*	chr1	165920000	165930000	10001	*	TRUE	FALSE	TRUE	TRUE	4.25681	loop_1393	550000	2.83333	7	-0.347522	0.0433767	0.390899	0.883099	FALSE	FALSE	FALSE	6	3	5	7	1	5	1	2	3	4	0	2	2	3	1	2	0	4	4	0	3	0	6	4
chr1	165400000	165410000	10001	*	chr1	165590000	165600000	10001	*	TRUE	TRUE	TRUE	TRUE	9.19285	loop_1394	200000	30.5833	55	-0.124735	0.285159	0.409893	0.266597	FALSE	FALSE	FALSE	40	55	42	43	37	24	24	27	43	37	27	30	22	13	20	13	36	29	29	29	23	23	31	37
chr1	165460000	165470000	10001	*	chr1	165570000	165580000	10001	*	FALSE	FALSE	TRUE	FALSE	2.04307	loop_1395	120000	10.5833	21	-0.468607	-0.089565	0.379042	0.466943	FALSE	FALSE	FALSE	20	21	18	16	12	9	9	11	9	10	9	9	7	3	7	8	8	7	5	8	12	16	12	8
chr1	165600000	165610000	10001	*	chr1	165910000	165920000	10001	*	TRUE	TRUE	TRUE	TRUE	5.03565	loop_1396	320000	10.25	18	0.260556	0.617405	0.356848	0.27274	FALSE	FALSE	FALSE	18	10	14	14	8	10	4	6	16	6	11	14	11	7	5	5	10	9	8	10	15	11	10	14
chr1	165630000	165640000	10001	*	chr1	165690000	165700000	10001	*	FALSE	FALSE	FALSE	TRUE	2.66859	loop_1397	70000	10	24	-0.104129	-0.159386	-0.0552569	0.927595	FALSE	FALSE	FALSE	16	20	24	10	7	5	12	11	15	7	7	11	7	10	8	6	10	5	6	7	7	5	12	12
chr1	165630000	165640000	10001	*	chr1	165820000	165830000	10001	*	FALSE	FALSE	FALSE	TRUE	2.28255	loop_1398	200000	5.20833	10	-0.209367	-0.411111	-0.201744	0.779879	FALSE	FALSE	FALSE	10	8	8	8	5	8	7	3	8	9	6	5	5	3	3	0	2	6	8	0	4	3	3	3
chr1	165710000	165720000	10001	*	chr1	165910000	165920000	10001	*	TRUE	TRUE	TRUE	TRUE	5.86538	loop_1399	210000	19.125	33	0.00671032	0.049049	0.0423387	0.98555	FALSE	FALSE	FALSE	33	32	33	23	13	18	16	20	29	25	15	28	11	8	11	16	15	14	19	18	15	19	11	17
chr1	165720000	165730000	10001	*	chr1	166470000	166480000	10001	*	TRUE	TRUE	TRUE	TRUE	3.41291	loop_1400	760000	1.875	7	-0.712585	-0.122792	0.589793	0.765553	FALSE	FALSE	FALSE	3	5	7	2	2	0	1	2	1	0	2	1	0	0	4	2	2	0	2	3	1	2	2	1
chr1	165760000	165770000	10001	*	chr1	165910000	165920000	10001	*	FALSE	FALSE	FALSE	TRUE	3.41276	loop_1401	160000	12.7917	28	-0.4791	0.0237831	0.502883	0.355217	FALSE	FALSE	FALSE	23	14	18	28	7	16	16	15	10	11	13	12	9	7	9	3	10	9	13	12	15	10	22	5
chr1	165820000	165830000	10001	*	chr1	165900000	165910000	10001	*	TRUE	FALSE	TRUE	TRUE	2.71409	loop_1402	90000	14.5833	23	0.291756	0.210308	-0.0814475	0.680432	FALSE	FALSE	FALSE	22	21	19	20	19	16	9	4	14	22	20	17	12	12	14	7	12	13	11	11	23	9	12	11
chr1	165920000	165930000	10001	*	chr1	166430000	166440000	10001	*	FALSE	FALSE	TRUE	TRUE	5.11832	loop_1403	520000	6.79167	16	0.134565	1.05444	0.919878	0.0454058	FALSE	FALSE	FALSE	5	7	10	16	3	2	6	2	9	5	7	4	7	3	3	3	6	6	11	3	13	11	10	11
chr1	165920000	165930000	10001	*	chr1	166470000	166480000	10001	*	TRUE	TRUE	FALSE	TRUE	5.81633	loop_1404	560000	9.08333	23	-0.160768	0.552034	0.712802	0.239399	FALSE	FALSE	FALSE	23	14	15	11	3	8	5	5	9	9	6	8	4	6	8	4	6	15	6	5	13	7	15	13
chr1	166120000	166130000	10001	*	chr1	166410000	166420000	10001	*	FALSE	FALSE	TRUE	FALSE	2.42201	loop_1405	300000	3.375	8	-0.140454	1.08691	1.22736	0.128346	FALSE	FALSE	FALSE	8	2	4	3	0	4	2	3	1	1	3	2	2	4	2	2	4	3	6	4	6	7	2	6
chr1	166130000	166140000	10001	*	chr1	166480000	166490000	10001	*	TRUE	FALSE	FALSE	TRUE	3.3881	loop_1406	360000	7.125	15	-1.00355	-0.00152568	1.00203	0.0792039	FALSE	FALSE	FALSE	14	10	15	12	11	6	5	10	4	0	9	4	3	4	5	2	8	6	4	8	6	7	9	9
chr1	166900000	166910000	10001	*	chr1	167120000	167130000	10001	*	FALSE	FALSE	FALSE	TRUE	2.48254	loop_1407	230000	5.25	10	-0.10249	0.249438	0.351928	0.825917	FALSE	FALSE	FALSE	10	10	7	10	5	3	4	2	7	4	5	6	6	2	1	4	2	5	3	6	8	7	4	5
chr1	166900000	166910000	10001	*	chr1	167220000	167230000	10001	*	FALSE	FALSE	TRUE	FALSE	3.07362	loop_1408	330000	4.125	9	0.112567	0.661792	0.549225	0.546798	FALSE	FALSE	FALSE	5	7	9	4	3	5	2	0	3	3	3	7	1	2	6	2	5	5	1	3	7	8	3	5
chr1	166900000	166910000	10001	*	chr1	167440000	167450000	10001	*	FALSE	FALSE	TRUE	TRUE	2.81859	loop_1409	550000	4	13	1.08942	0.477405	-0.61201	0.226268	FALSE	FALSE	FALSE	3	4	3	5	0	3	3	6	9	13	8	3	4	1	2	4	2	2	3	5	4	5	1	3
chr1	166910000	166920000	10001	*	chr1	167050000	167060000	10001	*	TRUE	TRUE	TRUE	TRUE	8.12092	loop_1410	150000	24.75	49	-0.141723	-0.170615	-0.0288919	0.77536	FALSE	FALSE	FALSE	49	32	39	48	23	24	24	22	32	32	24	26	22	16	17	8	19	14	19	20	23	18	18	25
chr1	167060000	167070000	10001	*	chr1	167120000	167130000	10001	*	TRUE	TRUE	TRUE	TRUE	3.09439	loop_1411	70000	18.6667	34	-0.00238871	-0.173768	-0.171379	0.847527	FALSE	FALSE	FALSE	29	31	22	30	17	16	15	28	34	23	27	9	15	17	12	8	19	16	16	5	16	14	13	16
chr1	167060000	167070000	10001	*	chr1	167220000	167230000	10001	*	TRUE	TRUE	TRUE	TRUE	4.34412	loop_1412	170000	10.3333	18	0.363906	-0.077866	-0.441772	0.503434	FALSE	FALSE	FALSE	12	15	9	12	13	13	7	12	13	17	13	18	7	11	7	4	6	4	4	6	16	8	9	12
chr1	167060000	167070000	10001	*	chr1	167440000	167450000	10001	*	TRUE	TRUE	TRUE	TRUE	4.77106	loop_1413	390000	10.0833	21	0.10015	0.0563877	-0.0437622	0.969467	FALSE	FALSE	FALSE	21	11	8	18	9	6	10	13	9	10	17	12	4	6	13	6	7	8	8	7	11	7	8	13
chr1	167060000	167070000	10001	*	chr1	167530000	167540000	10001	*	TRUE	TRUE	TRUE	TRUE	4.32258	loop_1414	480000	7.33333	14	-0.00134555	-0.0555255	-0.05418	0.992119	FALSE	FALSE	FALSE	13	7	14	5	5	7	10	11	11	10	6	13	6	3	4	2	5	4	7	2	4	9	8	10
chr1	167260000	167270000	10001	*	chr1	167440000	167450000	10001	*	TRUE	TRUE	TRUE	TRUE	5.08967	loop_1415	190000	14.4167	24	0.168677	-0.254237	-0.422913	0.491694	FALSE	FALSE	FALSE	19	20	22	24	17	14	10	17	17	16	17	16	17	8	15	13	10	9	10	11	12	9	11	12
chr1	167260000	167270000	10001	*	chr1	167530000	167540000	10001	*	TRUE	TRUE	TRUE	TRUE	4.73457	loop_1416	280000	8.5	19	0.266388	-0.350224	-0.616612	0.429945	FALSE	FALSE	FALSE	14	19	12	12	6	6	5	10	11	13	14	17	6	4	3	8	2	4	6	2	7	8	8	7
chr1	167270000	167280000	10001	*	chr1	167390000	167400000	10001	*	TRUE	FALSE	FALSE	TRUE	3.01849	loop_1417	130000	9.875	25	0.00885436	-0.00260841	-0.0114628	0.999641	FALSE	FALSE	FALSE	25	12	12	13	8	11	8	8	11	13	16	10	4	9	5	5	3	5	8	7	17	9	7	11
chr1	167400000	167410000	10001	*	chr1	167530000	167540000	10001	*	FALSE	TRUE	FALSE	TRUE	3.77977	loop_1418	140000	10.5	21	0.220254	-0.142153	-0.362407	0.693417	FALSE	FALSE	FALSE	18	14	20	12	7	14	9	7	21	14	13	10	9	10	9	3	6	3	7	12	13	5	6	10
chr1	167440000	167450000	10001	*	chr1	167530000	167540000	10001	*	TRUE	FALSE	FALSE	TRUE	3.08015	loop_1419	100000	13.4583	26	0.12911	-0.29102	-0.420131	0.547733	FALSE	FALSE	FALSE	17	22	26	8	12	22	18	11	15	22	18	16	13	10	11	7	12	9	10	11	7	8	11	7
chr1	167550000	167560000	10001	*	chr1	167680000	167690000	10001	*	FALSE	FALSE	TRUE	FALSE	4.32874	loop_1420	140000	12.3333	21	-0.213981	0.144587	0.358568	0.689606	FALSE	FALSE	FALSE	18	13	13	16	13	21	10	18	12	15	15	5	8	6	11	8	15	15	9	11	14	9	12	9
chr1	167600000	167610000	10001	*	chr1	167680000	167690000	10001	*	TRUE	TRUE	TRUE	TRUE	6.11705	loop_1421	90000	24.5417	46	-0.220477	-0.773264	-0.552787	0.00818995	FALSE	TRUE	FALSE	46	32	45	46	22	29	26	41	39	23	24	31	19	17	15	17	18	13	12	8	15	20	15	16
chr1	167710000	167720000	10001	*	chr1	168080000	168090000	10001	*	FALSE	FALSE	FALSE	TRUE	3.29627	loop_1422	380000	4.33333	13	-0.136343	-0.373142	-0.236799	0.855887	FALSE	FALSE	FALSE	6	3	5	9	3	2	6	13	3	6	6	6	4	0	5	2	3	2	4	2	3	5	6	0
chr1	167720000	167730000	10001	*	chr1	167930000	167940000	10001	*	TRUE	FALSE	FALSE	TRUE	3.59014	loop_1423	220000	5.08333	10	-0.312532	0.157812	0.470344	0.743142	FALSE	FALSE	FALSE	10	9	9	8	4	7	3	2	5	8	3	4	2	2	3	4	7	1	3	3	3	10	5	7
chr1	167720000	167730000	10001	*	chr1	167800000	167810000	10001	*	TRUE	TRUE	TRUE	TRUE	4.47006	loop_1424	90000	15.125	28	-0.267322	-0.330968	-0.0636458	0.581406	FALSE	FALSE	FALSE	23	28	27	23	20	14	17	15	13	20	20	18	10	9	11	5	20	11	9	7	12	16	7	8
chr1	167800000	167810000	10001	*	chr1	168080000	168090000	10001	*	FALSE	FALSE	FALSE	TRUE	2.92916	loop_1425	290000	4.91667	10	0.128033	0.118428	-0.00960449	0.967695	FALSE	FALSE	FALSE	10	5	6	9	6	4	2	4	5	6	4	8	5	3	3	3	4	3	3	2	4	6	3	10
chr1	168080000	168090000	10001	*	chr1	168320000	168330000	10001	*	FALSE	FALSE	TRUE	TRUE	3.20983	loop_1426	250000	4.91667	11	0.263965	0.314176	0.0502116	0.842197	FALSE	FALSE	FALSE	6	7	6	9	2	6	2	4	5	4	5	4	6	6	5	2	4	2	4	1	4	5	11	8
chr1	168090000	168100000	10001	*	chr1	168150000	168160000	10001	*	TRUE	FALSE	FALSE	FALSE	2.26565	loop_1427	70000	8.83333	16	-0.414389	-0.163931	0.250458	0.644889	FALSE	FALSE	FALSE	16	14	16	14	7	12	9	8	6	7	7	10	5	7	5	6	2	6	11	1	9	14	15	5
chr1	168230000	168240000	10001	*	chr1	168320000	168330000	10001	*	TRUE	TRUE	FALSE	TRUE	3.8924	loop_1428	100000	16.5	40	0.303047	-0.747099	-1.05015	0.00260324	FALSE	TRUE	TRUE	21	21	28	40	9	17	16	19	29	23	26	25	14	13	12	14	5	6	9	7	12	10	13	7
chr1	168350000	168360000	10001	*	chr1	169340000	169350000	10001	*	TRUE	FALSE	FALSE	TRUE	3.41346	loop_1429	1000000	1.25	6	-0.312776	-0.134173	0.178602	0.966745	FALSE	FALSE	FALSE	3	1	0	2	2	1	1	2	1	1	0	1	1	0	2	1	0	0	0	0	6	2	2	1
chr1	168440000	168450000	10001	*	chr1	168570000	168580000	10001	*	TRUE	TRUE	TRUE	TRUE	6.93273	loop_1430	140000	18.125	37	-0.151036	0.103743	0.254779	0.740141	FALSE	FALSE	FALSE	37	33	33	25	12	14	12	16	25	15	16	13	20	5	17	10	16	14	13	12	25	15	20	17
chr1	168440000	168450000	10001	*	chr1	169340000	169350000	10001	*	FALSE	TRUE	TRUE	TRUE	3.95102	loop_1431	910000	3.75	10	1.17348	0.358919	-0.814557	0.158538	FALSE	FALSE	FALSE	5	4	0	5	1	2	3	5	10	5	6	6	4	5	3	2	1	3	1	1	4	5	1	8
chr1	168590000	168600000	10001	*	chr1	169540000	169550000	10001	*	FALSE	FALSE	TRUE	FALSE	3.21877	loop_1432	960000	2.95833	7	0.0756398	0.265906	0.190267	0.937716	FALSE	FALSE	FALSE	4	7	2	3	6	1	3	1	3	4	3	1	4	2	2	2	1	1	2	6	6	2	2	3
chr1	168600000	168610000	10001	*	chr1	169350000	169360000	10001	*	TRUE	TRUE	TRUE	TRUE	7.18453	loop_1433	760000	9.875	24	-0.495251	-0.368685	0.126566	0.412809	FALSE	FALSE	FALSE	17	14	20	24	9	10	7	14	9	11	10	7	6	4	6	7	6	3	9	4	11	7	10	12
chr1	168620000	168630000	10001	*	chr1	169100000	169110000	10001	*	TRUE	TRUE	TRUE	TRUE	3.21672	loop_1434	490000	6.125	12	-0.067438	0.0693876	0.136826	0.970864	FALSE	FALSE	FALSE	12	6	6	12	5	11	3	5	7	8	10	9	3	0	5	2	4	5	1	6	7	5	8	7
chr1	168620000	168630000	10001	*	chr1	168710000	168720000	10001	*	FALSE	TRUE	FALSE	FALSE	2.57088	loop_1435	100000	9.125	16	0.565454	-0.10002	-0.665473	0.221178	FALSE	FALSE	FALSE	13	14	13	12	4	7	4	13	13	16	12	13	13	6	6	8	5	4	4	6	6	5	9	13
chr1	168630000	168640000	10001	*	chr1	168790000	168800000	10001	*	FALSE	FALSE	FALSE	TRUE	1.94949	loop_1436	170000	7.04167	13	-0.262073	-0.245143	0.0169298	0.834833	FALSE	FALSE	FALSE	11	10	7	13	9	13	7	5	10	9	10	9	3	2	2	3	2	7	2	1	5	8	10	11
chr1	168700000	168710000	10001	*	chr1	169350000	169360000	10001	*	FALSE	TRUE	TRUE	TRUE	3.1021	loop_1437	660000	4.375	9	0.275913	0.529633	0.25372	0.713117	FALSE	FALSE	FALSE	8	6	9	4	0	5	1	3	2	7	6	8	1	2	4	3	0	3	2	4	4	7	8	8
chr1	168710000	168720000	10001	*	chr1	169100000	169110000	10001	*	FALSE	FALSE	TRUE	TRUE	2.21958	loop_1438	400000	6.41667	12	-0.053136	0.081531	0.134667	0.970711	FALSE	FALSE	FALSE	9	6	3	12	8	8	10	6	7	3	9	9	9	3	2	4	9	3	7	6	5	7	3	6
chr1	168910000	168920000	10001	*	chr1	169100000	169110000	10001	*	FALSE	FALSE	TRUE	FALSE	2.86967	loop_1439	200000	6.5	12	0.128615	0.713427	0.584811	0.284115	FALSE	FALSE	FALSE	6	8	11	5	3	8	5	6	5	7	4	9	6	4	6	1	4	7	5	4	10	11	9	12
chr1	169100000	169110000	10001	*	chr1	169350000	169360000	10001	*	TRUE	TRUE	TRUE	TRUE	3.4402	loop_1440	260000	5.75	13	-0.257978	-0.140952	0.117026	0.889463	FALSE	FALSE	FALSE	12	9	12	13	2	6	4	4	7	6	7	4	5	2	5	2	2	4	1	5	12	3	5	6
chr1	169420000	169430000	10001	*	chr1	169740000	169750000	10001	*	FALSE	TRUE	FALSE	FALSE	3.45724	loop_1441	330000	3.70833	8	0.637962	-0.0769523	-0.714914	0.492051	FALSE	FALSE	FALSE	8	3	6	5	4	2	2	2	6	2	8	4	3	4	4	5	3	3	1	1	3	6	1	3
chr1	169440000	169450000	10001	*	chr1	169710000	169720000	10001	*	TRUE	FALSE	FALSE	FALSE	3.83515	loop_1442	280000	4.08333	13	-0.572274	-0.758455	-0.186181	0.454601	FALSE	FALSE	FALSE	6	11	10	13	2	6	2	3	1	5	6	5	2	4	3	0	3	4	1	2	2	3	2	2
chr1	169460000	169470000	10001	*	chr1	169540000	169550000	10001	*	TRUE	TRUE	TRUE	TRUE	4.72356	loop_1443	90000	24.3333	55	-0.0773777	-0.123137	-0.0457588	0.895541	FALSE	FALSE	FALSE	55	39	43	42	25	16	17	16	37	34	25	21	15	11	18	16	18	13	15	15	30	13	19	31
chr1	169470000	169480000	10001	*	chr1	169800000	169810000	10001	*	TRUE	FALSE	FALSE	TRUE	2.72646	loop_1444	340000	5.20833	13	-0.110682	-0.156719	-0.0460367	0.962195	FALSE	FALSE	FALSE	5	10	6	13	9	4	1	6	5	4	8	7	4	3	2	4	1	6	4	0	5	6	8	4
chr1	169550000	169560000	10001	*	chr1	169800000	169810000	10001	*	TRUE	FALSE	FALSE	TRUE	4.6205	loop_1445	260000	9.66667	21	-0.472684	0.15581	0.628493	0.332918	FALSE	FALSE	FALSE	17	15	19	21	6	10	7	7	16	11	9	5	7	2	3	3	7	6	7	11	15	8	7	13
chr1	169600000	169610000	10001	*	chr1	169710000	169720000	10001	*	TRUE	TRUE	TRUE	TRUE	2.81151	loop_1446	120000	12	26	-0.204777	0.315576	0.520354	0.411246	FALSE	FALSE	FALSE	15	19	16	26	7	7	8	18	16	8	17	11	5	6	8	4	12	6	12	7	14	16	11	19
chr1	169600000	169610000	10001	*	chr1	169800000	169810000	10001	*	TRUE	FALSE	TRUE	TRUE	4.08529	loop_1447	210000	8.875	20	-0.67897	0.113655	0.792625	0.174879	FALSE	FALSE	FALSE	20	11	19	17	11	9	8	3	12	7	4	8	5	4	5	1	6	8	11	6	10	8	10	10
chr1	169920000	169930000	10001	*	chr1	170460000	170470000	10001	*	TRUE	FALSE	FALSE	FALSE	3.51679	loop_1448	550000	2.375	8	-0.272009	-0.229513	0.0424959	0.943078	FALSE	FALSE	FALSE	4	3	8	8	0	2	2	0	4	0	4	3	1	1	1	2	2	0	2	0	4	3	2	1
chr1	169920000	169930000	10001	*	chr1	170520000	170530000	10001	*	TRUE	TRUE	TRUE	TRUE	2.91713	loop_1449	610000	4.29167	13	-0.124323	-0.0880138	0.0363091	0.979308	FALSE	FALSE	FALSE	13	7	9	4	6	4	0	2	8	6	5	6	2	1	1	2	1	4	1	2	7	7	2	3
chr1	169920000	169930000	10001	*	chr1	170680000	170690000	10001	*	TRUE	FALSE	TRUE	TRUE	3.12816	loop_1450	770000	5	10	-0.283354	0.235078	0.518432	0.698144	FALSE	FALSE	FALSE	8	9	8	10	3	4	5	3	7	6	9	4	1	2	2	1	4	2	6	3	6	3	7	7
chr1	169920000	169930000	10001	*	chr1	170760000	170770000	10001	*	TRUE	TRUE	FALSE	TRUE	3.29667	loop_1451	850000	4.08333	12	0.237555	-0.744964	-0.982519	0.370999	FALSE	FALSE	FALSE	4	6	10	12	2	3	4	3	6	8	4	5	5	5	3	1	0	1	5	2	4	1	3	1
chr1	169920000	169930000	10001	*	chr1	170930000	170940000	10001	*	FALSE	TRUE	FALSE	FALSE	3.91035	loop_1452	1020000	3.41667	8	0.805226	0.313283	-0.491942	0.524257	FALSE	FALSE	FALSE	8	8	6	6	0	0	1	0	6	4	7	4	1	6	2	3	4	1	1	2	3	1	4	4
chr1	169930000	169940000	10001	*	chr1	170880000	170890000	10001	*	TRUE	TRUE	TRUE	TRUE	3.15585	loop_1453	960000	4.54167	11	0.0900264	0.219118	0.129092	0.943078	FALSE	FALSE	FALSE	11	10	8	6	2	2	2	2	5	1	4	5	2	2	7	6	1	4	2	4	8	6	3	6
chr1	169930000	169940000	10001	*	chr1	170070000	170080000	10001	*	TRUE	FALSE	TRUE	TRUE	2.92187	loop_1454	150000	8.25	23	-0.998233	-0.654718	0.343515	0.0439349	FALSE	FALSE	FALSE	17	23	20	16	8	9	10	7	6	3	11	7	4	3	4	3	3	4	3	6	7	7	9	8
chr1	170000000	170010000	10001	*	chr1	170530000	170540000	10001	*	TRUE	FALSE	FALSE	TRUE	2.53379	loop_1455	540000	2.83333	6	-0.111622	0.145526	0.257148	0.950208	FALSE	FALSE	FALSE	5	4	6	5	1	3	2	2	1	3	5	3	2	2	2	1	1	3	0	3	6	2	2	4
chr1	170010000	170020000	10001	*	chr1	170760000	170770000	10001	*	TRUE	FALSE	FALSE	TRUE	2.88366	loop_1456	760000	4.16667	11	-0.0608401	-0.816727	-0.755887	0.463871	FALSE	FALSE	FALSE	11	9	11	9	2	3	3	1	3	3	4	7	4	1	4	7	0	2	3	3	3	1	2	4
chr1	170090000	170100000	10001	*	chr1	170920000	170930000	10001	*	FALSE	TRUE	FALSE	FALSE	2.70615	loop_1457	840000	1.79167	5	0.938992	0.189463	-0.749529	0.564675	FALSE	FALSE	FALSE	1	3	5	3	0	1	1	0	3	4	3	2	1	3	2	1	1	2	0	0	2	2	0	3
chr1	170510000	170520000	10001	*	chr1	170650000	170660000	10001	*	TRUE	FALSE	FALSE	FALSE	2.37245	loop_1458	150000	6.54167	17	-0.733518	-0.497097	0.236421	0.327358	FALSE	FALSE	FALSE	13	12	16	17	8	7	4	5	11	5	3	9	3	1	2	4	5	7	6	0	7	1	5	6
chr1	170520000	170530000	10001	*	chr1	170920000	170930000	10001	*	FALSE	TRUE	FALSE	FALSE	3.84444	loop_1459	410000	3.75	9	0.691009	0.117216	-0.573793	0.510859	FALSE	FALSE	FALSE	7	4	6	6	2	2	3	1	4	9	7	5	2	3	5	2	3	1	1	3	2	2	4	6
chr1	170530000	170540000	10001	*	chr1	170760000	170770000	10001	*	FALSE	TRUE	FALSE	FALSE	2.54197	loop_1460	240000	4.75	10	1.08151	0.0782262	-1.00328	0.074456	FALSE	FALSE	FALSE	6	4	4	5	3	2	6	4	8	10	8	9	3	2	8	6	3	2	2	2	6	3	1	7
chr1	170680000	170690000	10001	*	chr1	170760000	170770000	10001	*	TRUE	TRUE	FALSE	TRUE	2.6608	loop_1461	90000	11.875	28	0.0190971	-0.328367	-0.347464	0.659872	FALSE	FALSE	FALSE	28	21	28	19	7	9	5	10	11	16	9	13	14	10	8	10	11	7	4	5	9	14	7	10
chr1	170680000	170690000	10001	*	chr1	170920000	170930000	10001	*	FALSE	TRUE	FALSE	FALSE	2.89227	loop_1462	250000	6.66667	14	0.334515	0.369363	0.0348484	0.73009	FALSE	FALSE	FALSE	10	10	14	13	2	4	3	3	11	5	12	6	1	6	5	7	5	6	2	5	7	10	7	6
chr1	170690000	170700000	10001	*	chr1	170880000	170890000	10001	*	FALSE	FALSE	TRUE	TRUE	2.98973	loop_1463	200000	8.08333	16	0.137623	0.786957	0.649333	0.16244	FALSE	FALSE	FALSE	9	4	8	16	5	5	7	11	5	7	8	11	3	6	9	4	4	11	9	13	7	11	14	7
chr1	170750000	170760000	10001	*	chr1	170880000	170890000	10001	*	FALSE	FALSE	TRUE	FALSE	2.03494	loop_1464	140000	5.58333	11	0.158676	0.496509	0.337833	0.647255	FALSE	FALSE	FALSE	11	9	4	8	3	5	3	5	4	6	8	6	2	3	6	4	4	3	4	6	10	9	2	9
chr1	170770000	170780000	10001	*	chr1	170930000	170940000	10001	*	FALSE	TRUE	FALSE	TRUE	2.52906	loop_1465	170000	5.29167	15	0.0567607	-0.738815	-0.795576	0.394912	FALSE	FALSE	FALSE	9	10	15	15	4	3	1	3	9	8	5	5	5	5	3	4	1	3	0	3	6	2	3	5
chr1	170960000	170970000	10001	*	chr1	171220000	171230000	10001	*	TRUE	TRUE	TRUE	TRUE	5.28017	loop_1466	270000	12.375	33	0.0814709	-0.0616935	-0.143164	0.935193	FALSE	FALSE	FALSE	18	21	23	33	7	8	8	7	14	13	14	23	6	6	7	13	5	7	10	7	10	12	13	12
chr1	170970000	170980000	10001	*	chr1	171310000	171320000	10001	*	TRUE	TRUE	FALSE	TRUE	3.63374	loop_1467	350000	5.66667	13	0.144608	-0.364245	-0.508853	0.695055	FALSE	FALSE	FALSE	13	13	9	13	3	2	4	3	7	6	13	8	6	2	2	4	3	5	2	2	3	6	4	3
chr1	171070000	171080000	10001	*	chr1	171310000	171320000	10001	*	TRUE	TRUE	FALSE	TRUE	2.92547	loop_1468	250000	4.95833	13	-0.104366	-0.999586	-0.895219	0.26157	FALSE	FALSE	FALSE	7	12	13	4	6	6	5	5	6	11	4	8	2	3	3	4	2	0	5	0	3	2	1	7
chr1	171080000	171090000	10001	*	chr1	171180000	171190000	10001	*	FALSE	FALSE	FALSE	TRUE	2.43855	loop_1469	110000	12.4583	24	0.25648	0.0561623	-0.200318	0.771852	FALSE	FALSE	FALSE	19	24	16	23	6	13	8	8	20	13	14	12	10	8	6	18	9	7	7	12	13	10	13	10
chr1	171080000	171090000	10001	*	chr1	171220000	171230000	10001	*	TRUE	TRUE	TRUE	TRUE	4.18937	loop_1470	150000	14.5833	33	0.265183	-0.165623	-0.430806	0.496984	FALSE	FALSE	FALSE	32	24	20	29	5	15	9	8	33	27	8	16	10	10	9	13	9	9	5	9	12	12	10	16
chr1	171240000	171250000	10001	*	chr1	171310000	171320000	10001	*	TRUE	FALSE	TRUE	TRUE	2.66144	loop_1471	80000	13.75	31	-0.380848	-0.196299	0.184549	0.551787	FALSE	FALSE	FALSE	26	27	16	31	17	8	14	13	14	11	13	16	7	8	7	10	10	7	4	11	13	21	13	13
chr1	171640000	171650000	10001	*	chr1	171710000	171720000	10001	*	FALSE	FALSE	TRUE	TRUE	2.78674	loop_1472	80000	12.5417	20	0.48715	0.738	0.250849	0.111721	FALSE	FALSE	FALSE	13	16	15	20	6	8	9	9	15	19	16	17	7	10	9	7	19	6	16	13	13	3	17	18
chr1	171640000	171650000	10001	*	chr1	171980000	171990000	10001	*	TRUE	TRUE	TRUE	TRUE	5.06031	loop_1473	350000	9	17	0.254955	-0.288589	-0.543544	0.489491	FALSE	FALSE	FALSE	13	15	17	17	10	8	4	5	17	15	14	11	6	4	5	8	5	6	7	3	6	5	7	8
chr1	171800000	171810000	10001	*	chr1	171980000	171990000	10001	*	TRUE	TRUE	TRUE	TRUE	8.72604	loop_1474	190000	30.25	68	-0.307171	-0.173364	0.133808	0.430205	FALSE	FALSE	FALSE	58	50	57	68	22	28	24	26	39	29	25	28	25	18	13	20	18	16	23	26	36	30	19	28
chr1	171800000	171810000	10001	*	chr1	172400000	172410000	10001	*	FALSE	TRUE	TRUE	TRUE	3.29041	loop_1475	610000	4.5	9	0.520891	-0.217351	-0.738242	0.488538	FALSE	FALSE	FALSE	6	9	7	7	3	1	3	5	8	6	7	3	7	5	7	0	3	3	0	4	3	3	2	6
chr1	172000000	172010000	10001	*	chr1	172410000	172420000	10001	*	TRUE	TRUE	TRUE	TRUE	4.99924	loop_1476	420000	10.4167	24	0.102014	0.0199826	-0.0820316	0.965551	FALSE	FALSE	FALSE	22	19	18	24	6	4	7	4	12	22	14	12	4	6	6	6	8	3	8	6	10	11	10	8
chr1	172000000	172010000	10001	*	chr1	172720000	172730000	10001	*	TRUE	TRUE	TRUE	TRUE	4.26449	loop_1477	730000	3.91667	10	-0.187872	0.615886	0.803758	0.437698	FALSE	FALSE	FALSE	10	4	2	4	2	3	3	6	3	3	4	3	3	3	1	2	5	3	2	2	6	8	8	4
chr1	172090000	172100000	10001	*	chr1	172400000	172410000	10001	*	TRUE	TRUE	TRUE	TRUE	5.65869	loop_1478	320000	16.4583	32	0.0792105	0.163434	0.0842234	0.879949	FALSE	FALSE	FALSE	32	25	30	19	7	12	13	17	23	24	23	10	10	7	13	12	11	9	11	11	23	16	19	18
chr1	172250000	172260000	10001	*	chr1	172390000	172400000	10001	*	TRUE	FALSE	FALSE	TRUE	2.78869	loop_1479	150000	10.25	24	0.0256975	0.398509	0.372812	0.581278	FALSE	FALSE	FALSE	13	17	19	24	6	4	7	5	13	8	17	15	8	1	5	5	11	7	5	5	12	12	10	17
chr1	172350000	172360000	10001	*	chr1	172390000	172400000	10001	*	FALSE	FALSE	TRUE	TRUE	2.04496	loop_1480	50000	15.125	31	-0.0372951	0.18457	0.221865	0.809484	FALSE	FALSE	FALSE	26	22	22	31	7	9	12	17	19	27	17	11	2	7	14	9	10	9	9	10	15	22	14	22
chr1	172450000	172460000	10001	*	chr1	172530000	172540000	10001	*	FALSE	FALSE	TRUE	FALSE	3.40738	loop_1481	90000	11.0833	23	-0.448268	0.41544	0.863708	0.0974867	FALSE	FALSE	FALSE	11	14	23	22	7	15	7	10	10	9	8	10	10	6	5	1	8	9	15	11	14	10	11	20
chr1	172450000	172460000	10001	*	chr1	172720000	172730000	10001	*	TRUE	TRUE	TRUE	TRUE	6.37685	loop_1482	280000	10.2083	19	0.249328	-0.118739	-0.368067	0.672726	FALSE	FALSE	FALSE	19	13	9	14	8	13	10	10	10	17	18	16	3	8	6	9	6	7	3	7	9	9	11	10
chr1	172530000	172540000	10001	*	chr1	172720000	172730000	10001	*	FALSE	FALSE	FALSE	TRUE	3.20253	loop_1483	200000	8.95833	17	0.178755	0.194426	0.0156704	0.884072	FALSE	FALSE	FALSE	14	16	12	11	5	4	10	9	8	8	13	12	13	4	6	4	6	4	7	4	12	17	9	7
chr1	172610000	172620000	10001	*	chr1	172710000	172720000	10001	*	TRUE	TRUE	TRUE	TRUE	6.0975	loop_1484	110000	18.4583	38	-0.0104891	-0.266608	-0.256119	0.666104	FALSE	FALSE	FALSE	30	38	35	36	11	11	20	14	28	25	19	15	19	11	13	11	11	6	12	16	14	14	14	20
chr1	172740000	172750000	10001	*	chr1	173200000	173210000	10001	*	TRUE	TRUE	TRUE	TRUE	5.42009	loop_1485	470000	15.375	30	-0.0227718	0.00817463	0.0309464	0.996006	FALSE	FALSE	FALSE	30	25	22	24	16	11	18	6	25	13	19	18	16	7	9	6	8	10	9	13	23	12	13	16
chr1	172740000	172750000	10001	*	chr1	173420000	173430000	10001	*	TRUE	TRUE	TRUE	TRUE	4.80523	loop_1486	690000	8.08333	19	0.61496	-0.0420621	-0.657022	0.26196	FALSE	FALSE	FALSE	15	10	13	11	4	6	6	4	9	11	10	19	2	5	14	9	3	5	3	6	3	8	7	11
chr1	172740000	172750000	10001	*	chr1	173820000	173830000	10001	*	TRUE	TRUE	TRUE	TRUE	5.1673	loop_1487	1090000	4.125	10	0.484958	-0.311545	-0.796503	0.527401	FALSE	FALSE	FALSE	4	5	9	8	0	9	1	3	7	3	10	7	6	1	2	3	0	2	2	3	2	6	3	3
chr1	172760000	172770000	10001	*	chr1	172800000	172810000	10001	*	FALSE	TRUE	FALSE	FALSE	2.46515	loop_1488	50000	10.4167	18	0.481343	-0.042804	-0.524147	0.345208	FALSE	FALSE	FALSE	10	18	15	13	10	7	11	8	10	11	18	16	11	11	10	8	8	6	4	9	17	9	5	5
chr1	172820000	172830000	10001	*	chr1	173050000	173060000	10001	*	TRUE	TRUE	TRUE	TRUE	2.28645	loop_1489	240000	7.83333	17	-0.551437	-0.266784	0.284654	0.478731	FALSE	FALSE	FALSE	17	15	10	14	9	8	8	8	8	6	12	6	3	5	4	2	3	5	5	2	13	6	10	9
chr1	172820000	172830000	10001	*	chr1	173200000	173210000	10001	*	TRUE	TRUE	TRUE	TRUE	6.16301	loop_1490	390000	24.2083	58	-0.255272	-0.167877	0.0873951	0.617481	FALSE	FALSE	FALSE	47	39	58	51	15	17	25	14	28	30	28	31	18	5	13	12	22	10	17	17	18	14	24	28
chr1	173000000	173010000	10001	*	chr1	173190000	173200000	10001	*	FALSE	FALSE	FALSE	TRUE	2.22301	loop_1491	200000	7.29167	18	-0.0756711	-0.133956	-0.058285	0.963573	FALSE	FALSE	FALSE	18	14	11	15	4	7	2	6	9	11	12	5	3	6	4	3	4	2	2	8	7	4	7	11
chr1	173250000	173260000	10001	*	chr1	173410000	173420000	10001	*	FALSE	TRUE	TRUE	FALSE	3.63744	loop_1492	170000	11.5	22	0.0539203	-0.0602233	-0.114144	0.961569	FALSE	FALSE	FALSE	18	19	17	22	9	13	11	5	13	16	19	18	6	7	3	8	11	6	6	10	14	6	5	14
chr1	173260000	173270000	10001	*	chr1	173350000	173360000	10001	*	FALSE	TRUE	TRUE	TRUE	2.22687	loop_1493	100000	8.45833	16	0.267752	0.535124	0.267372	0.476927	FALSE	FALSE	FALSE	16	16	7	11	7	6	4	4	14	14	12	4	6	6	4	4	6	5	6	7	10	14	10	10
chr1	173260000	173270000	10001	*	chr1	173820000	173830000	10001	*	FALSE	FALSE	FALSE	TRUE	2.98906	loop_1494	570000	2.5	7	-0.0827755	0.122528	0.205304	0.972842	FALSE	FALSE	FALSE	3	4	7	0	1	2	3	4	1	1	4	3	0	6	0	2	1	3	2	1	1	3	3	5
chr1	173420000	173430000	10001	*	chr1	173820000	173830000	10001	*	TRUE	TRUE	TRUE	TRUE	4.61176	loop_1495	410000	10.75	22	0.406548	0.274999	-0.131549	0.570867	FALSE	FALSE	FALSE	22	19	18	13	5	8	3	6	14	14	13	11	7	10	10	10	10	7	7	5	15	6	15	10
chr1	173420000	173430000	10001	*	chr1	174070000	174080000	10001	*	FALSE	TRUE	FALSE	TRUE	3.79315	loop_1496	660000	3.33333	8	0.755446	0.545359	-0.210087	0.560317	FALSE	FALSE	FALSE	4	6	4	3	1	1	1	5	2	4	8	6	1	3	7	1	6	3	3	3	1	1	3	3
chr1	173420000	173430000	10001	*	chr1	174210000	174220000	10001	*	FALSE	TRUE	TRUE	TRUE	3.59936	loop_1497	800000	3.41667	10	0.491226	1.80448	1.31325	0.0249047	FALSE	TRUE	TRUE	1	10	2	7	0	0	0	1	4	2	1	3	2	1	2	4	5	4	6	2	9	5	7	4
chr1	173430000	173440000	10001	*	chr1	173470000	173480000	10001	*	TRUE	TRUE	TRUE	TRUE	2.47597	loop_1498	50000	17.5833	37	-0.0020138	-0.220907	-0.218893	0.75506	FALSE	FALSE	FALSE	30	24	35	37	17	19	9	12	26	23	18	23	13	15	7	11	14	10	13	11	15	14	7	19
chr1	173430000	173440000	10001	*	chr1	173710000	173720000	10001	*	TRUE	FALSE	FALSE	TRUE	3.10984	loop_1499	290000	8.58333	21	-0.21642	-0.0055911	0.210829	0.868418	FALSE	FALSE	FALSE	21	11	18	13	2	5	10	10	16	10	6	10	3	4	5	4	6	4	6	9	11	5	10	7
chr1	173430000	173440000	10001	*	chr1	174740000	174750000	10001	*	FALSE	FALSE	TRUE	FALSE	4.22017	loop_1500	1320000	1.66667	5	0.385761	1.47877	1.09301	0.272262	FALSE	FALSE	FALSE	2	2	5	1	0	0	0	1	1	1	2	1	2	2	1	0	2	2	2	2	5	3	1	2
chr1	173970000	173980000	10001	*	chr1	174210000	174220000	10001	*	FALSE	FALSE	TRUE	TRUE	3.10299	loop_1501	250000	5.75	13	-0.184776	0.713721	0.898496	0.199917	FALSE	FALSE	FALSE	5	8	11	12	3	3	7	1	3	4	6	7	3	4	1	4	4	5	4	5	8	7	10	13
chr1	173980000	173990000	10001	*	chr1	174070000	174080000	10001	*	FALSE	TRUE	FALSE	TRUE	2.36881	loop_1502	100000	7.875	17	-0.047569	0.00164517	0.0492141	0.992882	FALSE	FALSE	FALSE	12	15	17	11	3	9	5	7	7	11	8	5	6	8	9	2	3	4	9	4	8	6	9	11
chr1	174090000	174100000	10001	*	chr1	174210000	174220000	10001	*	TRUE	TRUE	TRUE	TRUE	3.41135	loop_1503	130000	11.2917	26	-0.229167	-0.50155	-0.272383	0.47196	FALSE	FALSE	FALSE	24	26	23	19	7	11	15	5	12	12	9	8	8	6	9	15	7	4	7	8	9	7	11	9
chr1	174090000	174100000	10001	*	chr1	174740000	174750000	10001	*	TRUE	TRUE	FALSE	TRUE	3.64684	loop_1504	660000	4.20833	11	-0.468268	-1.37933	-0.91106	0.115746	FALSE	FALSE	FALSE	11	10	9	8	7	4	3	4	6	5	8	4	3	2	1	2	0	2	3	1	1	4	2	1
chr1	174250000	174260000	10001	*	chr1	174740000	174750000	10001	*	TRUE	TRUE	TRUE	TRUE	9.72012	loop_1505	500000	18	39	0.0100058	0.493467	0.483461	0.178626	FALSE	FALSE	FALSE	39	30	28	25	15	10	12	5	19	21	21	21	13	8	10	8	13	14	18	18	30	15	15	24
chr1	174250000	174260000	10001	*	chr1	174980000	174990000	10001	*	TRUE	TRUE	TRUE	TRUE	3.46362	loop_1506	740000	3.45833	7	0.022785	-0.07771	-0.100495	0.98917	FALSE	FALSE	FALSE	5	5	4	5	2	4	6	3	7	3	4	3	2	2	1	4	0	4	2	3	5	3	2	4
chr1	174400000	174410000	10001	*	chr1	174720000	174730000	10001	*	TRUE	FALSE	TRUE	TRUE	2.8201	loop_1507	330000	5.16667	12	0.15556	0.572216	0.416657	0.575792	FALSE	FALSE	FALSE	12	3	8	6	6	3	3	3	6	5	6	6	2	5	3	3	2	3	5	8	9	7	6	4
chr1	174770000	174780000	10001	*	chr1	174870000	174880000	10001	*	FALSE	FALSE	FALSE	TRUE	2.26029	loop_1508	110000	8.375	19	0.216646	0.500114	0.283468	0.599196	FALSE	FALSE	FALSE	19	9	19	7	1	6	3	7	12	9	12	2	4	5	11	5	6	2	7	5	13	6	14	17
chr1	174770000	174780000	10001	*	chr1	174980000	174990000	10001	*	TRUE	TRUE	TRUE	TRUE	8.35486	loop_1509	220000	18.2917	39	-0.100359	0.0141072	0.114466	0.92651	FALSE	FALSE	FALSE	39	32	35	33	10	14	17	8	24	24	14	22	9	13	10	12	13	10	14	10	16	20	19	21
chr1	174880000	174890000	10001	*	chr1	174980000	174990000	10001	*	FALSE	FALSE	TRUE	TRUE	2.86833	loop_1510	110000	10.0833	21	-0.235322	-0.3261	-0.0907779	0.701363	FALSE	FALSE	FALSE	20	18	17	21	7	7	11	11	10	11	15	12	7	5	4	7	6	7	6	8	7	2	12	11
chr1	175030000	175040000	10001	*	chr1	175120000	175130000	10001	*	TRUE	TRUE	TRUE	TRUE	6.29489	loop_1511	100000	21	35	0.0881265	-0.133069	-0.221196	0.766947	FALSE	FALSE	FALSE	33	35	32	28	22	23	20	15	32	30	25	33	13	12	14	10	11	15	21	13	19	14	20	14
chr1	175030000	175040000	10001	*	chr1	175310000	175320000	10001	*	TRUE	TRUE	FALSE	TRUE	3.87326	loop_1512	290000	6.875	16	0.0825298	-0.560899	-0.643429	0.465012	FALSE	FALSE	FALSE	11	16	9	11	8	6	6	6	6	9	15	13	3	2	2	9	7	3	3	1	6	5	5	3
chr1	175150000	175160000	10001	*	chr1	175220000	175230000	10001	*	TRUE	FALSE	FALSE	TRUE	2.97112	loop_1513	80000	18.2083	34	-0.249566	-0.885071	-0.635505	0.0123227	FALSE	TRUE	TRUE	28	32	34	32	20	28	18	25	20	17	20	33	15	11	14	8	12	8	6	10	14	10	17	5
chr1	175150000	175160000	10001	*	chr1	175320000	175330000	10001	*	TRUE	TRUE	TRUE	TRUE	9.12614	loop_1514	180000	25.1667	46	-0.0619648	0.0792314	0.141196	0.878855	FALSE	FALSE	FALSE	36	28	30	46	23	26	27	30	35	29	19	25	19	14	20	16	22	22	17	22	31	25	23	19
chr1	175150000	175160000	10001	*	chr1	176070000	176080000	10001	*	FALSE	FALSE	FALSE	TRUE	3.49864	loop_1515	930000	2.25	5	-0.493658	0.306773	0.800431	0.684529	FALSE	FALSE	FALSE	3	4	5	1	0	5	4	1	1	3	2	2	1	1	1	1	2	1	3	2	3	1	4	3
chr1	175160000	175170000	10001	*	chr1	175190000	175200000	10001	*	FALSE	FALSE	TRUE	FALSE	2.17323	loop_1516	40000	21.125	32	-0.0345961	-0.0985537	-0.0639576	0.943218	FALSE	FALSE	FALSE	31	32	30	31	24	16	29	19	26	28	26	25	15	15	9	13	11	17	12	19	26	12	18	23
chr1	175210000	175220000	10001	*	chr1	175310000	175320000	10001	*	FALSE	FALSE	TRUE	TRUE	2.14573	loop_1517	110000	12.2917	26	-0.0520982	0.274857	0.326955	0.672414	FALSE	FALSE	FALSE	20	21	26	21	11	6	10	4	10	13	14	15	9	4	6	12	10	7	12	11	17	14	15	7
chr1	175350000	175360000	10001	*	chr1	176310000	176320000	10001	*	TRUE	FALSE	FALSE	FALSE	2.96517	loop_1518	970000	1.66667	7	-0.694614	0.0675628	0.762177	0.766759	FALSE	FALSE	FALSE	2	7	3	4	0	2	1	0	2	1	0	1	2	1	1	0	0	1	1	1	3	1	5	1
chr1	175370000	175380000	10001	*	chr1	175740000	175750000	10001	*	TRUE	FALSE	FALSE	TRUE	2.70483	loop_1519	380000	6.79167	16	-0.773042	-0.447577	0.325464	0.292499	FALSE	FALSE	FALSE	9	10	16	13	5	12	5	13	11	5	2	5	5	3	3	3	5	2	7	6	9	3	4	7
chr1	175370000	175380000	10001	*	chr1	175880000	175890000	10001	*	TRUE	FALSE	TRUE	TRUE	2.75761	loop_1520	520000	6.5	12	0.117308	0.395017	0.277709	0.732602	FALSE	FALSE	FALSE	12	7	8	5	5	8	6	6	10	5	7	5	1	9	3	6	9	4	8	3	11	6	7	5
chr1	175370000	175380000	10001	*	chr1	176070000	176080000	10001	*	TRUE	TRUE	TRUE	TRUE	6.54427	loop_1521	710000	7.75	16	0.0565924	0.341233	0.284641	0.760566	FALSE	FALSE	FALSE	16	15	16	12	6	3	2	4	7	10	15	7	2	5	7	3	6	4	9	11	10	4	3	9
chr1	175390000	175400000	10001	*	chr1	176350000	176360000	10001	*	FALSE	FALSE	FALSE	TRUE	2.20531	loop_1522	970000	2.33333	6	0.201096	0.586022	0.384927	0.785329	FALSE	FALSE	FALSE	3	5	3	4	0	2	1	1	3	2	3	1	3	0	2	2	2	1	1	0	3	5	6	3
chr1	175470000	175480000	10001	*	chr1	175880000	175890000	10001	*	FALSE	FALSE	TRUE	TRUE	2.55357	loop_1523	420000	4.125	8	-0.410948	-0.203519	0.207429	0.811457	FALSE	FALSE	FALSE	8	7	3	5	7	2	7	5	2	5	4	1	5	2	5	1	2	4	1	1	4	5	6	7
chr1	175480000	175490000	10001	*	chr1	175740000	175750000	10001	*	TRUE	FALSE	FALSE	FALSE	2.17111	loop_1524	270000	6.33333	17	-0.843001	-0.850322	-0.00732017	0.118815	FALSE	FALSE	FALSE	13	8	8	17	11	11	11	4	7	3	6	5	4	2	3	5	3	3	4	3	7	2	8	4
chr1	175480000	175490000	10001	*	chr1	176070000	176080000	10001	*	TRUE	TRUE	TRUE	TRUE	3.80772	loop_1525	600000	4.75	11	-1.24058	-0.245999	0.99458	0.118903	FALSE	FALSE	FALSE	9	11	10	6	7	8	4	5	3	2	7	3	0	1	4	0	2	7	2	5	5	2	6	5
chr1	175610000	175620000	10001	*	chr1	176310000	176320000	10001	*	FALSE	FALSE	TRUE	FALSE	2.60634	loop_1526	710000	1.29167	4	-0.145309	1.43353	1.57884	0.328851	FALSE	FALSE	FALSE	1	1	0	1	4	0	0	2	4	0	0	3	0	0	0	0	1	2	2	1	1	3	1	4
chr1	175750000	175760000	10001	*	chr1	175890000	175900000	10001	*	FALSE	FALSE	TRUE	FALSE	2.28849	loop_1527	150000	6.58333	14	-0.152232	1.06898	1.22121	0.013091	FALSE	TRUE	TRUE	13	5	8	3	6	6	6	4	6	6	9	4	3	1	2	4	9	11	8	5	11	9	5	14
chr1	175750000	175760000	10001	*	chr1	176060000	176070000	10001	*	FALSE	FALSE	TRUE	TRUE	2.74911	loop_1528	320000	4.08333	11	-0.556563	-0.553332	0.00323051	0.605855	FALSE	FALSE	FALSE	11	10	9	5	2	2	3	8	6	4	3	6	2	0	4	1	4	0	3	3	2	4	5	1
chr1	175920000	175930000	10001	*	chr1	176070000	176080000	10001	*	TRUE	TRUE	FALSE	TRUE	2.33261	loop_1529	160000	6.54167	17	-0.191687	-0.789127	-0.59744	0.334966	FALSE	FALSE	FALSE	11	16	13	17	8	3	5	5	11	9	7	4	1	7	7	4	4	3	3	4	2	7	4	2
chr1	176370000	176380000	10001	*	chr1	176460000	176470000	10001	*	FALSE	FALSE	TRUE	FALSE	2.79813	loop_1530	100000	10.8333	24	-0.277711	0.897764	1.17547	0.00197533	FALSE	TRUE	TRUE	11	14	17	13	6	8	11	10	10	9	5	14	2	6	4	6	6	13	13	16	24	16	13	13
chr1	176370000	176380000	10001	*	chr1	176550000	176560000	10001	*	TRUE	FALSE	TRUE	TRUE	3.25068	loop_1531	190000	11.8333	25	-0.408971	0.0054034	0.414374	0.489099	FALSE	FALSE	FALSE	25	20	21	21	8	12	12	7	18	7	9	6	6	9	8	7	6	8	10	6	18	16	14	10
chr1	176370000	176380000	10001	*	chr1	176680000	176690000	10001	*	TRUE	TRUE	TRUE	TRUE	3.82383	loop_1532	320000	10.9583	22	-0.588589	0.329621	0.91821	0.0811274	FALSE	FALSE	FALSE	22	20	14	22	3	11	9	12	9	4	10	5	7	4	4	11	11	12	6	10	18	11	16	12
chr1	176370000	176380000	10001	*	chr1	176840000	176850000	10001	*	TRUE	TRUE	TRUE	TRUE	5.95648	loop_1533	480000	13.0417	33	-0.151009	-0.555049	-0.404041	0.303098	FALSE	FALSE	FALSE	33	23	23	21	7	15	13	12	16	13	13	16	9	11	11	8	7	8	6	3	13	12	12	8
chr1	176370000	176380000	10001	*	chr1	176880000	176890000	10001	*	TRUE	FALSE	FALSE	FALSE	5.76355	loop_1534	520000	11.3333	27	-0.311739	-0.0334772	0.278262	0.741279	FALSE	FALSE	FALSE	21	27	21	15	6	13	7	12	8	6	13	15	3	5	8	13	13	9	9	3	15	11	6	13
chr1	176550000	176560000	10001	*	chr1	176840000	176850000	10001	*	TRUE	TRUE	FALSE	TRUE	5.39619	loop_1535	300000	12.9583	29	0.0226206	-0.726069	-0.74869	0.0911964	FALSE	FALSE	FALSE	24	18	25	29	9	8	15	16	14	23	16	20	10	10	11	5	7	6	9	3	7	8	13	5
chr1	176560000	176570000	10001	*	chr1	176690000	176700000	10001	*	TRUE	TRUE	TRUE	TRUE	4.45878	loop_1536	140000	18.75	36	-0.0866585	-0.195239	-0.10858	0.817585	FALSE	FALSE	FALSE	26	36	25	27	21	14	25	20	21	24	23	27	10	10	13	11	15	12	14	9	12	21	16	18
chr1	176560000	176570000	10001	*	chr1	176880000	176890000	10001	*	TRUE	FALSE	TRUE	TRUE	5.74837	loop_1537	330000	13.2917	25	-0.0580592	-0.285361	-0.227302	0.733746	FALSE	FALSE	FALSE	22	19	25	17	9	15	14	18	25	17	17	15	7	8	6	8	6	10	9	12	15	11	7	7
chr1	176690000	176700000	10001	*	chr1	176840000	176850000	10001	*	FALSE	TRUE	FALSE	TRUE	2.48737	loop_1538	160000	10.1667	22	-0.0384796	-0.664008	-0.625528	0.246144	FALSE	FALSE	FALSE	22	15	15	17	7	14	14	9	10	11	13	13	11	7	15	2	3	8	6	7	8	5	5	7
chr1	176890000	176900000	10001	*	chr1	177180000	177190000	10001	*	TRUE	TRUE	TRUE	TRUE	5.58075	loop_1539	300000	13.875	28	-0.331135	0.230893	0.562028	0.288851	FALSE	FALSE	FALSE	20	28	20	21	14	15	10	11	16	15	13	14	5	5	4	11	7	11	14	10	22	17	14	16
chr1	176890000	176900000	10001	*	chr1	177350000	177360000	10001	*	TRUE	TRUE	TRUE	TRUE	5.17262	loop_1540	470000	10.5	20	0.348223	0.424599	0.0763768	0.541421	FALSE	FALSE	FALSE	12	12	19	16	8	5	7	9	10	20	16	6	8	11	4	8	10	6	11	5	18	7	12	12
chr1	176890000	176900000	10001	*	chr1	177780000	177790000	10001	*	TRUE	TRUE	TRUE	TRUE	3.90277	loop_1541	900000	6.41667	15	0.00913105	0.441789	0.432657	0.659229	FALSE	FALSE	FALSE	9	11	5	7	5	15	5	1	11	9	3	7	2	4	4	4	4	3	11	7	8	5	7	7
chr1	176890000	176900000	10001	*	chr1	177940000	177950000	10001	*	TRUE	TRUE	TRUE	TRUE	6.0171	loop_1542	1060000	8.66667	18	-0.088183	0.187088	0.275271	0.831146	FALSE	FALSE	FALSE	13	12	18	16	5	10	4	7	11	12	10	7	6	3	10	1	8	6	6	9	12	6	8	8
chr1	177180000	177190000	10001	*	chr1	177350000	177360000	10001	*	TRUE	TRUE	FALSE	TRUE	2.52409	loop_1543	180000	10.2083	20	-0.112743	0.172969	0.285712	0.793719	FALSE	FALSE	FALSE	18	9	18	20	9	9	9	8	8	11	11	10	7	9	7	5	7	11	5	11	12	9	7	15
chr1	177180000	177190000	10001	*	chr1	177780000	177790000	10001	*	FALSE	FALSE	TRUE	TRUE	2.55317	loop_1544	610000	4.54167	10	-0.205323	0.634955	0.840278	0.33994	FALSE	FALSE	FALSE	10	3	7	7	3	2	5	3	1	3	2	4	3	4	6	2	4	4	5	4	6	5	7	9
chr1	177180000	177190000	10001	*	chr1	177940000	177950000	10001	*	FALSE	FALSE	TRUE	TRUE	3.23632	loop_1545	770000	5.20833	11	-0.472959	-0.0646234	0.408336	0.694885	FALSE	FALSE	FALSE	11	11	8	3	4	6	5	8	7	4	2	4	2	4	3	4	2	1	6	5	8	4	5	8
chr1	177250000	177260000	10001	*	chr1	177350000	177360000	10001	*	TRUE	FALSE	FALSE	TRUE	3.06432	loop_1546	110000	13.7083	27	-0.145164	-0.121271	0.023893	0.89867	FALSE	FALSE	FALSE	21	27	20	23	12	14	13	12	23	11	12	19	8	5	8	11	8	8	10	9	14	8	15	18
chr1	177250000	177260000	10001	*	chr1	177940000	177950000	10001	*	TRUE	FALSE	FALSE	FALSE	3.41308	loop_1547	700000	4.54167	13	-0.369162	-1.07879	-0.709627	0.221445	FALSE	FALSE	FALSE	10	13	9	8	6	6	3	3	4	5	7	4	4	4	3	2	2	2	3	2	3	3	2	1
chr1	177350000	177360000	10001	*	chr1	177940000	177950000	10001	*	FALSE	FALSE	FALSE	TRUE	2.71717	loop_1548	600000	5.45833	12	-0.656249	-0.062995	0.593254	0.482108	FALSE	FALSE	FALSE	12	10	2	11	6	6	10	4	3	4	5	6	3	3	2	3	5	5	3	5	2	9	5	7
chr1	177420000	177430000	10001	*	chr1	177910000	177920000	10001	*	TRUE	FALSE	FALSE	FALSE	2.68767	loop_1549	500000	3.91667	10	-0.663015	-1.16544	-0.502422	0.230955	FALSE	FALSE	FALSE	10	9	9	3	7	7	3	4	6	4	2	9	2	2	1	0	0	3	0	3	3	4	2	1
chr1	177440000	177450000	10001	*	chr1	177770000	177780000	10001	*	FALSE	FALSE	TRUE	FALSE	2.27706	loop_1550	340000	5.29167	15	0.114094	1.31021	1.19611	0.0196971	FALSE	TRUE	TRUE	8	7	1	4	4	6	4	2	3	5	9	4	4	1	1	3	6	5	8	11	15	3	8	5
chr1	177790000	177800000	10001	*	chr1	177940000	177950000	10001	*	FALSE	FALSE	TRUE	FALSE	3.44099	loop_1551	160000	7.625	15	0.668804	0.993757	0.324953	0.0800226	FALSE	FALSE	FALSE	9	6	5	5	6	5	6	8	12	7	13	6	3	8	7	5	4	7	13	7	6	13	15	7
chr1	177950000	177960000	10001	*	chr1	178030000	178040000	10001	*	TRUE	FALSE	FALSE	FALSE	2.60727	loop_1552	90000	8.75	18	-0.247082	-0.0426604	0.204422	0.843958	FALSE	FALSE	FALSE	18	12	17	10	15	6	8	6	9	9	9	12	3	5	5	6	10	10	5	3	7	8	9	8
chr1	177950000	177960000	10001	*	chr1	178510000	178520000	10001	*	FALSE	TRUE	FALSE	FALSE	3.68819	loop_1553	570000	3.58333	10	0.667557	0.286833	-0.380724	0.605974	FALSE	FALSE	FALSE	1	4	4	4	2	5	5	3	6	4	4	10	2	2	4	2	1	3	5	2	4	2	1	6
chr1	177960000	177970000	10001	*	chr1	178280000	178290000	10001	*	FALSE	TRUE	FALSE	TRUE	4.39625	loop_1554	330000	6.75	13	0.397633	0.0817408	-0.315892	0.699328	FALSE	FALSE	FALSE	11	13	5	11	4	6	5	5	5	10	9	11	10	2	5	6	4	4	4	4	10	5	9	4
chr1	178020000	178030000	10001	*	chr1	178500000	178510000	10001	*	TRUE	FALSE	TRUE	TRUE	4.05692	loop_1555	490000	3.375	8	-0.492019	-0.0475694	0.44445	0.773784	FALSE	FALSE	FALSE	6	7	3	5	6	3	3	3	3	3	3	6	0	1	2	2	0	5	3	2	2	4	1	8
chr1	178030000	178040000	10001	*	chr1	178280000	178290000	10001	*	TRUE	TRUE	TRUE	TRUE	5.12057	loop_1556	260000	13.4583	34	0.172415	0.0704977	-0.101917	0.887777	FALSE	FALSE	FALSE	19	22	21	20	13	7	12	12	9	15	16	34	11	7	8	8	7	10	10	11	13	12	12	14
chr1	178050000	178060000	10001	*	chr1	178190000	178200000	10001	*	TRUE	TRUE	FALSE	TRUE	2.85386	loop_1557	150000	10.0417	22	0.222645	-0.290003	-0.512648	0.509473	FALSE	FALSE	FALSE	18	15	15	18	8	11	9	5	15	22	12	12	5	5	7	9	5	4	2	10	14	5	5	10
chr1	178090000	178100000	10001	*	chr1	178180000	178190000	10001	*	TRUE	FALSE	FALSE	TRUE	2.06505	loop_1558	100000	10.7917	27	-0.312663	0.0808097	0.393473	0.631636	FALSE	FALSE	FALSE	27	17	21	12	3	10	12	11	4	12	13	16	5	7	7	4	9	9	9	9	11	8	10	13
chr1	178090000	178100000	10001	*	chr1	178280000	178290000	10001	*	FALSE	TRUE	TRUE	TRUE	3.18342	loop_1559	200000	10.2917	18	0.207366	0.161111	-0.0462554	0.867692	FALSE	FALSE	FALSE	15	7	18	18	8	9	9	9	17	14	7	12	8	11	4	7	8	5	3	9	14	10	18	7
chr1	178190000	178200000	10001	*	chr1	178280000	178290000	10001	*	TRUE	FALSE	FALSE	TRUE	2.77471	loop_1560	100000	10.125	18	-0.214602	0.107607	0.32221	0.743973	FALSE	FALSE	FALSE	16	18	18	16	10	9	8	7	9	12	10	9	3	6	6	10	7	7	8	5	13	14	10	12
chr1	178240000	178250000	10001	*	chr1	178270000	178280000	10001	*	TRUE	FALSE	FALSE	FALSE	2.1899	loop_1561	40000	16.7083	27	0.29152	0.1235	-0.168021	0.643782	FALSE	FALSE	FALSE	21	26	22	27	18	13	7	16	18	23	24	27	12	15	8	10	9	11	10	7	23	21	16	17
chr1	178300000	178310000	10001	*	chr1	179000000	179010000	10001	*	TRUE	TRUE	TRUE	TRUE	5.32658	loop_1562	710000	4.16667	11	0.12078	-0.503154	-0.623934	0.647435	FALSE	FALSE	FALSE	9	11	4	5	4	2	1	8	5	4	4	6	1	4	6	4	4	1	0	3	5	3	2	4
chr1	178310000	178320000	10001	*	chr1	178500000	178510000	10001	*	TRUE	TRUE	TRUE	TRUE	6.96488	loop_1563	200000	7.125	17	-0.172975	-0.243534	-0.0705587	0.890449	FALSE	FALSE	FALSE	9	8	8	9	4	17	7	12	15	5	10	6	4	1	6	5	9	4	4	6	9	6	3	4
chr1	178310000	178320000	10001	*	chr1	178740000	178750000	10001	*	TRUE	TRUE	TRUE	TRUE	3.22017	loop_1564	440000	1.5	4	-0.0398806	-0.15443	-0.114549	0.98919	FALSE	FALSE	FALSE	2	2	4	2	1	2	1	1	0	1	3	3	1	1	2	0	1	1	0	0	3	0	1	4
chr1	178530000	178540000	10001	*	chr1	179360000	179370000	10001	*	FALSE	TRUE	FALSE	TRUE	3.39755	loop_1565	840000	2.16667	5	0.165448	0.435739	0.270291	0.87778	FALSE	FALSE	FALSE	1	1	2	3	4	4	2	1	1	1	3	1	3	2	2	2	2	4	1	0	3	1	5	3
chr1	178540000	178550000	10001	*	chr1	178750000	178760000	10001	*	TRUE	TRUE	TRUE	TRUE	5.87834	loop_1566	220000	19.3333	32	-0.289838	0.371224	0.661062	0.0755876	FALSE	FALSE	FALSE	32	28	29	28	12	20	17	20	20	24	19	21	6	7	11	8	24	12	20	14	32	19	17	24
chr1	178540000	178550000	10001	*	chr1	179000000	179010000	10001	*	TRUE	TRUE	TRUE	TRUE	6.88324	loop_1567	470000	14.7083	27	0.227217	-1.02129	-1.24851	0.000497781	FALSE	TRUE	TRUE	23	27	18	18	20	11	14	26	25	24	20	23	16	14	5	12	4	5	3	4	10	12	10	9
chr1	178550000	178560000	10001	*	chr1	178590000	178600000	10001	*	TRUE	FALSE	FALSE	TRUE	2.0626	loop_1568	50000	11.5417	22	-0.027064	-0.257189	-0.230125	0.777962	FALSE	FALSE	FALSE	22	18	17	18	9	14	9	12	13	12	10	7	13	14	10	7	9	6	7	5	12	13	7	13
chr1	178560000	178570000	10001	*	chr1	179370000	179380000	10001	*	FALSE	FALSE	TRUE	FALSE	3.37186	loop_1569	820000	1.33333	5	0.780507	1.77282	0.992318	0.313163	FALSE	FALSE	FALSE	2	1	1	0	0	2	0	0	2	0	1	0	0	2	3	0	1	0	0	1	3	4	5	4
chr1	178600000	178610000	10001	*	chr1	178720000	178730000	10001	*	TRUE	FALSE	FALSE	TRUE	2.43639	loop_1570	130000	9.25	17	0.0901842	-0.0876969	-0.177881	0.920455	FALSE	FALSE	FALSE	14	10	17	12	10	10	7	9	14	10	15	4	9	7	8	5	4	6	7	4	13	11	10	6
chr1	178600000	178610000	10001	*	chr1	178750000	178760000	10001	*	FALSE	FALSE	TRUE	FALSE	2.77383	loop_1571	160000	8.41667	16	0.119346	0.296462	0.177116	0.80116	FALSE	FALSE	FALSE	16	8	7	16	5	9	7	7	11	6	4	8	13	7	7	4	8	7	3	6	10	9	10	14
chr1	178770000	178780000	10001	*	chr1	179000000	179010000	10001	*	TRUE	TRUE	TRUE	TRUE	4.82356	loop_1572	240000	9.54167	16	0.00221368	-0.429305	-0.431519	0.543785	FALSE	FALSE	FALSE	14	13	14	11	14	14	7	12	15	14	7	16	5	9	4	6	4	7	3	5	8	8	5	14
chr1	179070000	179080000	10001	*	chr1	179370000	179380000	10001	*	TRUE	TRUE	TRUE	TRUE	5.31899	loop_1573	310000	7.08333	15	0.283046	0.335712	0.0526651	0.761551	FALSE	FALSE	FALSE	8	15	7	8	6	3	4	10	10	9	10	13	5	3	3	4	4	4	7	6	9	5	11	6
chr1	179110000	179120000	10001	*	chr1	179290000	179300000	10001	*	TRUE	TRUE	TRUE	TRUE	2.91729	loop_1574	190000	7.29167	13	0.381367	-0.0259385	-0.407306	0.618571	FALSE	FALSE	FALSE	13	6	10	9	8	5	8	6	12	6	7	11	9	7	8	3	5	3	2	6	9	6	7	9
chr1	179120000	179130000	10001	*	chr1	179190000	179200000	10001	*	TRUE	TRUE	TRUE	TRUE	4.49221	loop_1575	80000	21.4167	43	-0.178899	-0.297111	-0.118212	0.606128	FALSE	FALSE	FALSE	29	43	39	38	16	20	24	21	31	22	16	31	21	7	15	9	9	10	11	12	21	25	13	31
chr1	179240000	179250000	10001	*	chr1	179590000	179600000	10001	*	TRUE	TRUE	FALSE	TRUE	3.71359	loop_1576	360000	2.91667	7	-0.1392	-0.390368	-0.251167	0.879803	FALSE	FALSE	FALSE	5	7	4	5	2	6	1	2	5	2	4	2	1	2	3	2	2	1	1	1	0	5	4	3
chr1	179250000	179260000	10001	*	chr1	179370000	179380000	10001	*	TRUE	TRUE	FALSE	TRUE	4.1602	loop_1577	130000	8.83333	22	-0.271498	-0.659722	-0.388225	0.337476	FALSE	FALSE	FALSE	22	12	22	18	7	9	7	7	9	10	5	13	7	6	4	9	6	3	3	5	7	5	5	11
chr1	179420000	179430000	10001	*	chr1	179610000	179620000	10001	*	TRUE	FALSE	FALSE	FALSE	2.43222	loop_1578	200000	4.375	10	-0.235166	-0.338085	-0.102919	0.850495	FALSE	FALSE	FALSE	9	6	9	10	5	3	4	2	6	5	3	3	4	2	4	3	3	3	1	0	3	5	8	4
chr1	179700000	179710000	10001	*	chr1	179810000	179820000	10001	*	TRUE	TRUE	TRUE	TRUE	7.05766	loop_1579	120000	23.1667	34	-0.0540355	-0.165468	-0.111433	0.847794	FALSE	FALSE	FALSE	33	33	26	33	34	21	27	28	34	29	19	31	11	17	20	12	12	19	20	15	19	17	23	23
chr1	179860000	179870000	10001	*	chr1	180170000	180180000	10001	*	TRUE	TRUE	TRUE	TRUE	5.63534	loop_1580	320000	10.5	24	0.447857	-0.2505	-0.698357	0.228543	FALSE	FALSE	FALSE	15	10	13	14	14	9	10	10	16	18	24	15	2	12	10	4	6	5	5	7	11	5	9	8
chr1	179870000	179880000	10001	*	chr1	180060000	180070000	10001	*	FALSE	TRUE	FALSE	FALSE	2.63024	loop_1581	200000	4.58333	10	0.519229	-0.925739	-1.44497	0.0855431	FALSE	FALSE	FALSE	9	4	10	4	1	4	3	10	9	8	5	8	4	5	4	5	0	2	1	4	2	4	0	4
chr1	179870000	179880000	10001	*	chr1	180470000	180480000	10001	*	FALSE	TRUE	FALSE	TRUE	3.22969	loop_1582	610000	2.29167	5	0.291203	-0.0277891	-0.318992	0.918103	FALSE	FALSE	FALSE	4	5	1	4	0	2	3	2	3	3	4	5	1	0	3	1	1	0	2	2	1	2	3	3
chr1	180090000	180100000	10001	*	chr1	180160000	180170000	10001	*	TRUE	TRUE	TRUE	TRUE	2.59095	loop_1583	80000	13.6667	29	-0.221551	-0.291779	-0.0702281	0.691871	FALSE	FALSE	FALSE	29	27	16	26	11	10	16	14	18	15	13	17	9	9	8	6	4	10	2	13	9	15	16	15
chr1	180190000	180200000	10001	*	chr1	180410000	180420000	10001	*	FALSE	FALSE	TRUE	FALSE	3.36932	loop_1584	230000	7.08333	15	0.0879154	0.279401	0.191486	0.844008	FALSE	FALSE	FALSE	12	10	10	7	6	6	10	3	8	15	8	7	5	2	4	3	4	4	3	7	10	8	7	11
chr1	180190000	180200000	10001	*	chr1	180470000	180480000	10001	*	TRUE	TRUE	FALSE	TRUE	5.27361	loop_1585	290000	7.54167	13	0.15697	-0.242441	-0.399411	0.724148	FALSE	FALSE	FALSE	11	11	11	13	8	7	7	7	12	11	9	10	5	5	3	8	6	3	8	3	4	7	4	8
chr1	180250000	180260000	10001	*	chr1	180410000	180420000	10001	*	TRUE	TRUE	TRUE	TRUE	3.71409	loop_1586	170000	15.875	31	-0.339056	-0.223509	0.115546	0.567383	FALSE	FALSE	FALSE	29	31	21	29	10	20	19	16	29	21	17	13	5	5	6	11	11	10	14	12	15	13	12	12
chr1	180250000	180260000	10001	*	chr1	180480000	180490000	10001	*	TRUE	TRUE	TRUE	TRUE	4.90106	loop_1587	240000	13.375	26	0.22974	-0.15149	-0.381229	0.571698	FALSE	FALSE	FALSE	18	14	17	26	13	11	13	16	19	12	17	18	10	16	11	8	7	9	8	9	17	10	8	14
chr1	180510000	180520000	10001	*	chr1	180860000	180870000	10001	*	TRUE	TRUE	TRUE	TRUE	10.7279	loop_1588	360000	13.8333	33	-0.0231294	-0.0911303	-0.068001	0.966409	FALSE	FALSE	FALSE	22	23	19	33	14	8	9	13	21	12	19	18	6	11	11	5	9	6	10	10	18	12	9	14
chr1	180510000	180520000	10001	*	chr1	181150000	181160000	10001	*	TRUE	TRUE	TRUE	TRUE	5.45034	loop_1589	650000	5.54167	12	0.578248	0.3318	-0.246448	0.558974	FALSE	FALSE	FALSE	8	8	3	5	4	6	6	3	11	9	9	4	6	3	5	2	6	4	0	1	12	6	4	8
chr1	180520000	180530000	10001	*	chr1	181030000	181040000	10001	*	FALSE	TRUE	TRUE	FALSE	3.5077	loop_1590	520000	3.16667	8	1.20393	0.312443	-0.891486	0.181754	FALSE	FALSE	FALSE	3	3	4	3	0	5	1	2	6	4	8	3	6	1	2	6	1	1	3	2	3	1	3	5
chr1	180530000	180540000	10001	*	chr1	180630000	180640000	10001	*	TRUE	TRUE	TRUE	TRUE	3.3506	loop_1591	110000	11.375	26	0.183698	-0.158465	-0.342163	0.708007	FALSE	FALSE	FALSE	19	14	26	17	6	10	9	11	13	15	13	14	11	14	7	6	8	6	6	9	8	10	6	15
chr1	180540000	180550000	10001	*	chr1	180780000	180790000	10001	*	FALSE	FALSE	TRUE	FALSE	3.30231	loop_1592	250000	6.33333	14	-0.291754	0.732712	1.02447	0.0973886	FALSE	FALSE	FALSE	14	6	7	9	3	7	5	4	7	5	2	4	3	4	5	3	7	3	7	8	11	7	8	13
chr1	180630000	180640000	10001	*	chr1	180860000	180870000	10001	*	TRUE	TRUE	TRUE	TRUE	5.08351	loop_1593	240000	10.7917	32	-0.330219	-0.962164	-0.631944	0.0849775	FALSE	FALSE	FALSE	32	25	28	19	5	7	9	12	12	9	13	17	9	10	8	0	2	3	6	7	4	9	8	5
chr1	180770000	180780000	10001	*	chr1	180830000	180840000	10001	*	FALSE	TRUE	FALSE	FALSE	2.24958	loop_1594	70000	8.66667	17	0.580258	0.291001	-0.289257	0.380931	FALSE	FALSE	FALSE	12	10	13	15	3	7	6	5	10	15	7	17	8	8	6	7	9	3	5	4	9	8	10	11
chr1	180880000	180890000	10001	*	chr1	181080000	181090000	10001	*	FALSE	FALSE	FALSE	TRUE	2.58637	loop_1595	210000	7.125	14	-0.101556	0.248928	0.350483	0.778711	FALSE	FALSE	FALSE	14	9	11	12	5	7	3	7	9	5	8	9	5	6	3	2	5	8	3	2	12	4	10	12
chr1	180880000	180890000	10001	*	chr1	181160000	181170000	10001	*	TRUE	TRUE	TRUE	TRUE	9.39935	loop_1596	290000	19.5	35	0.486072	0.545893	0.0598215	0.101219	FALSE	FALSE	FALSE	23	25	35	22	8	11	16	15	29	27	27	26	17	11	12	13	18	13	20	11	30	22	15	22
chr1	180890000	180900000	10001	*	chr1	181420000	181430000	10001	*	TRUE	TRUE	FALSE	TRUE	2.88815	loop_1597	540000	3.5	8	0.415039	0.721111	0.306071	0.572364	FALSE	FALSE	FALSE	4	5	4	5	2	4	2	1	8	2	5	7	2	1	2	1	4	4	3	1	4	3	6	4
chr1	181030000	181040000	10001	*	chr1	181140000	181150000	10001	*	TRUE	TRUE	TRUE	TRUE	5.88609	loop_1598	120000	21.5417	42	-0.168047	-0.62651	-0.458463	0.0745343	FALSE	FALSE	FALSE	38	38	28	42	20	31	22	25	32	26	23	29	13	17	15	9	9	13	13	11	17	8	22	16
chr1	181090000	181100000	10001	*	chr1	181140000	181150000	10001	*	TRUE	TRUE	TRUE	TRUE	3.28632	loop_1599	60000	26.8333	40	-0.210253	0.11642	0.326673	0.521904	FALSE	FALSE	FALSE	34	33	27	40	35	25	40	31	24	22	24	35	18	23	16	11	27	21	26	14	30	28	28	32
chr1	181190000	181200000	10001	*	chr1	181420000	181430000	10001	*	TRUE	TRUE	TRUE	TRUE	11.9519	loop_1600	240000	26.7917	50	-0.290817	-0.351414	-0.0605974	0.320694	FALSE	FALSE	FALSE	49	50	44	44	27	25	32	29	43	20	23	28	17	17	18	18	23	15	22	20	17	19	20	23
chr1	181190000	181200000	10001	*	chr1	181940000	181950000	10001	*	FALSE	FALSE	TRUE	TRUE	4.69051	loop_1601	760000	1.41667	6	0.214907	1.56573	1.35083	0.266913	FALSE	FALSE	FALSE	1	1	1	2	2	0	1	0	2	1	1	1	1	0	0	1	0	1	0	2	6	3	4	3
chr1	181470000	181480000	10001	*	chr1	181930000	181940000	10001	*	TRUE	FALSE	TRUE	TRUE	5.0572	loop_1602	470000	10.7083	20	-1.7526	0.913694	2.66629	1.42337e-12	TRUE	TRUE	TRUE	16	14	16	19	10	11	10	8	6	4	7	3	1	0	1	2	20	17	12	12	17	15	19	17
chr1	181470000	181480000	10001	*	chr1	182050000	182060000	10001	*	TRUE	TRUE	TRUE	TRUE	4.35198	loop_1603	590000	7.91667	19	0.393666	-0.279928	-0.673595	0.378962	FALSE	FALSE	FALSE	16	9	19	10	3	5	8	5	15	13	10	10	6	4	4	10	4	0	3	3	10	6	8	9
chr1	181480000	181490000	10001	*	chr1	182400000	182410000	10001	*	FALSE	TRUE	FALSE	TRUE	3.18448	loop_1604	930000	2.29167	5	0.12693	-0.643373	-0.770303	0.696653	FALSE	FALSE	FALSE	4	3	3	0	4	4	5	1	3	5	5	1	3	1	1	1	1	0	3	1	3	0	1	2
chr1	181480000	181490000	10001	*	chr1	181670000	181680000	10001	*	TRUE	FALSE	TRUE	TRUE	3.40043	loop_1605	200000	9	24	-1.3853	-0.32666	1.05864	0.0021366	TRUE	FALSE	TRUE	24	22	21	17	8	10	8	10	3	6	8	4	1	4	3	5	9	8	7	5	11	8	8	6
chr1	181680000	181690000	10001	*	chr1	181920000	181930000	10001	*	FALSE	FALSE	TRUE	FALSE	2.80859	loop_1606	250000	4.66667	14	-0.136105	0.954416	1.09052	0.106583	FALSE	FALSE	FALSE	7	7	7	4	2	4	3	3	4	5	3	3	1	4	3	2	4	9	3	2	14	5	6	7
chr1	181940000	181950000	10001	*	chr1	182060000	182070000	10001	*	FALSE	FALSE	TRUE	FALSE	3.6216	loop_1607	130000	5.75	14	-0.457823	0.661842	1.11967	0.160284	FALSE	FALSE	FALSE	12	14	8	7	3	3	1	6	1	4	10	6	2	3	0	3	7	1	9	3	11	8	9	7
chr1	182080000	182090000	10001	*	chr1	182390000	182400000	10001	*	TRUE	TRUE	TRUE	TRUE	6.61627	loop_1608	320000	24.4583	39	0.0897116	-0.0177108	-0.107422	0.914148	FALSE	FALSE	FALSE	36	32	34	39	19	26	23	27	30	29	33	37	15	17	19	10	17	20	15	13	15	31	27	23
chr1	182080000	182090000	10001	*	chr1	182590000	182600000	10001	*	TRUE	TRUE	TRUE	TRUE	3.71135	loop_1609	520000	6.70833	14	-0.377932	-0.274281	0.103651	0.730891	FALSE	FALSE	FALSE	14	12	8	13	9	4	6	9	6	14	7	8	4	3	2	1	4	4	6	5	9	5	5	3
chr1	182080000	182090000	10001	*	chr1	182780000	182790000	10001	*	TRUE	TRUE	TRUE	TRUE	4.29181	loop_1610	710000	6.04167	12	0.0814414	0.0758119	-0.00562951	0.985502	FALSE	FALSE	FALSE	12	3	7	12	9	3	8	3	10	9	5	2	5	8	2	4	4	2	5	4	5	9	6	8
chr1	182140000	182150000	10001	*	chr1	182390000	182400000	10001	*	TRUE	TRUE	TRUE	TRUE	5.30029	loop_1611	260000	24.0833	42	0.0867967	-0.413132	-0.499929	0.159819	FALSE	FALSE	FALSE	42	35	39	38	24	22	21	28	34	36	41	30	12	15	17	16	19	7	13	14	26	17	17	15
chr1	182300000	182310000	10001	*	chr1	182380000	182390000	10001	*	FALSE	FALSE	TRUE	FALSE	3.11356	loop_1612	90000	10.5833	17	0.271422	0.865659	0.594236	0.0436052	FALSE	FALSE	FALSE	16	14	9	15	9	6	5	7	12	15	10	12	7	5	8	4	10	12	7	9	17	17	15	13
chr1	182440000	182450000	10001	*	chr1	182590000	182600000	10001	*	TRUE	FALSE	TRUE	TRUE	3.72598	loop_1613	160000	10.2917	23	-0.355675	-0.329659	0.0260159	0.593054	FALSE	FALSE	FALSE	23	20	21	13	6	11	11	12	15	10	9	14	3	6	5	7	5	7	9	9	7	7	9	8
chr1	182440000	182450000	10001	*	chr1	182780000	182790000	10001	*	TRUE	TRUE	TRUE	TRUE	4.80073	loop_1614	350000	8.5	21	-0.299821	-0.123027	0.176795	0.791119	FALSE	FALSE	FALSE	14	10	21	12	11	10	7	6	14	6	7	8	7	6	7	1	7	5	8	6	9	8	9	5
chr1	182600000	182610000	10001	*	chr1	182780000	182790000	10001	*	TRUE	TRUE	TRUE	TRUE	10.4749	loop_1615	190000	34.7917	54	-0.0801814	0.0175256	0.097707	0.9118	FALSE	FALSE	FALSE	53	53	42	53	34	28	38	44	54	38	37	34	25	12	25	24	31	28	31	20	34	30	36	31
chr1	182660000	182670000	10001	*	chr1	182760000	182770000	10001	*	TRUE	FALSE	FALSE	FALSE	2.62068	loop_1616	110000	11.4583	29	-0.117883	-0.223434	-0.105552	0.854278	FALSE	FALSE	FALSE	29	20	19	24	10	10	2	10	17	9	11	14	4	5	13	9	6	6	5	10	11	12	8	11
chr1	182870000	182880000	10001	*	chr1	186340000	186350000	10001	*	TRUE	TRUE	FALSE	TRUE	9.67653	loop_1617	3480000	0.791667	2	0.0101366	0.586845	0.576709	0.900265	FALSE	FALSE	FALSE	1	2	0	1	1	2	0	0	0	1	1	0	1	1	0	1	1	0	2	0	0	1	1	2
chr1	182940000	182950000	10001	*	chr1	183550000	183560000	10001	*	FALSE	FALSE	TRUE	FALSE	3.46897	loop_1618	620000	3.04167	8	0.622212	0.653253	0.0310408	0.692446	FALSE	FALSE	FALSE	3	1	2	5	5	0	1	5	4	6	5	1	2	5	1	1	5	1	1	0	0	6	5	8
chr1	182960000	182970000	10001	*	chr1	183020000	183030000	10001	*	TRUE	TRUE	FALSE	TRUE	2.82176	loop_1619	70000	17.9167	35	0.287439	-0.0612574	-0.348696	0.48466	FALSE	FALSE	FALSE	29	30	25	22	11	16	18	15	20	35	29	21	10	9	17	12	8	8	11	7	19	19	17	22
chr1	182960000	182970000	10001	*	chr1	183110000	183120000	10001	*	TRUE	FALSE	FALSE	FALSE	3.72883	loop_1620	160000	10.3333	21	0.122038	-0.143088	-0.265126	0.829197	FALSE	FALSE	FALSE	13	21	19	18	8	7	8	8	14	12	14	9	7	5	10	10	4	4	4	7	11	14	5	16
chr1	182960000	182970000	10001	*	chr1	183140000	183150000	10001	*	FALSE	TRUE	FALSE	FALSE	3.1767	loop_1621	190000	8.375	17	0.253459	-0.0230537	-0.276513	0.796662	FALSE	FALSE	FALSE	11	12	15	11	7	9	4	8	17	14	6	10	9	7	1	6	5	4	4	2	9	10	11	9
chr1	182960000	182970000	10001	*	chr1	183230000	183240000	10001	*	TRUE	TRUE	TRUE	TRUE	3.3154	loop_1622	280000	9.70833	23	-0.223952	0.467721	0.691674	0.268586	FALSE	FALSE	FALSE	12	16	20	13	10	4	6	8	5	8	17	8	5	3	9	3	5	10	9	4	23	11	16	8
chr1	183130000	183140000	10001	*	chr1	183190000	183200000	10001	*	FALSE	TRUE	FALSE	FALSE	1.98829	loop_1623	70000	12.375	24	0.282659	0.0687776	-0.213882	0.737162	FALSE	FALSE	FALSE	24	14	21	20	5	6	12	12	17	21	21	9	8	6	13	8	4	8	8	9	13	16	8	14
chr1	183230000	183240000	10001	*	chr1	183270000	183280000	10001	*	FALSE	TRUE	FALSE	FALSE	2.3216	loop_1624	50000	15.9167	33	0.212261	-0.87813	-1.09039	0.00295143	FALSE	TRUE	TRUE	22	28	21	33	15	18	23	9	25	29	22	26	14	7	17	9	5	3	10	6	16	7	7	10
chr1	183280000	183290000	10001	*	chr1	183540000	183550000	10001	*	FALSE	TRUE	TRUE	TRUE	2.92723	loop_1625	270000	7.16667	12	1.00727	1.49028	0.483014	0.00194903	TRUE	TRUE	FALSE	2	7	10	9	4	2	4	2	8	11	12	11	7	1	5	5	8	9	6	10	12	7	10	10
chr1	183280000	183290000	10001	*	chr1	183610000	183620000	10001	*	FALSE	FALSE	TRUE	FALSE	3.73434	loop_1626	340000	1.79167	5	1.20587	0.941915	-0.263953	0.457107	FALSE	FALSE	FALSE	0	2	0	1	1	5	0	2	5	2	2	3	0	2	1	3	1	1	4	1	1	2	1	3
chr1	183470000	183480000	10001	*	chr1	183540000	183550000	10001	*	TRUE	FALSE	FALSE	FALSE	2.60166	loop_1627	80000	12.4583	27	-0.00608778	-0.284609	-0.278522	0.729426	FALSE	FALSE	FALSE	14	19	21	27	9	18	8	13	17	21	11	10	8	9	11	8	3	3	9	9	16	10	17	8
chr1	183470000	183480000	10001	*	chr1	183630000	183640000	10001	*	FALSE	FALSE	FALSE	TRUE	2.84131	loop_1628	170000	4.83333	12	-0.354356	-0.102893	0.251463	0.833923	FALSE	FALSE	FALSE	6	9	7	8	4	5	3	9	6	3	3	5	3	2	5	2	3	1	1	4	3	12	4	8
chr1	183540000	183550000	10001	*	chr1	183610000	183620000	10001	*	TRUE	FALSE	FALSE	FALSE	2.52354	loop_1629	80000	4.45833	11	-0.170874	0.361948	0.532822	0.710434	FALSE	FALSE	FALSE	7	3	7	11	6	1	6	2	4	4	8	0	2	2	4	4	3	3	5	8	4	5	4	4
chr1	183650000	183660000	10001	*	chr1	183910000	183920000	10001	*	TRUE	TRUE	TRUE	TRUE	8.2509	loop_1630	270000	16.9167	33	-0.349561	-0.354118	-0.00455681	0.378054	FALSE	FALSE	FALSE	24	32	33	27	19	22	17	16	17	16	18	18	9	9	11	13	8	10	8	13	15	16	14	21
chr1	183650000	183660000	10001	*	chr1	184220000	184230000	10001	*	FALSE	TRUE	FALSE	TRUE	4.20318	loop_1631	580000	2.33333	6	0.239405	0.109314	-0.130091	0.958761	FALSE	FALSE	FALSE	6	5	5	1	2	1	2	0	2	2	4	1	3	2	1	3	2	1	3	0	3	3	3	1
chr1	183650000	183660000	10001	*	chr1	184690000	184700000	10001	*	TRUE	TRUE	TRUE	TRUE	3.95724	loop_1632	1050000	1.95833	5	-0.347754	-0.125216	0.222538	0.933992	FALSE	FALSE	FALSE	4	5	5	3	0	4	0	1	0	3	4	3	1	2	0	0	1	0	1	2	1	3	2	2
chr1	183660000	183670000	10001	*	chr1	184060000	184070000	10001	*	FALSE	TRUE	FALSE	TRUE	3.46029	loop_1633	410000	1.91667	5	0.0295663	-0.490982	-0.520548	0.842182	FALSE	FALSE	FALSE	3	3	3	1	2	5	1	2	2	3	3	2	1	1	2	1	0	0	1	1	3	4	1	1
chr1	184070000	184080000	10001	*	chr1	184220000	184230000	10001	*	TRUE	TRUE	TRUE	TRUE	4.77919	loop_1634	160000	16.3333	39	-0.396575	0.0430738	0.439649	0.375308	FALSE	FALSE	FALSE	39	24	35	26	9	16	13	13	17	10	15	19	4	14	9	9	14	8	12	11	16	20	21	18
chr1	184070000	184080000	10001	*	chr1	184560000	184570000	10001	*	TRUE	TRUE	TRUE	TRUE	3.79608	loop_1635	500000	7.25	15	0.0829972	0.460973	0.377976	0.635682	FALSE	FALSE	FALSE	15	8	10	15	2	8	4	3	12	12	7	2	4	2	5	6	5	4	3	9	5	13	8	12
chr1	184070000	184080000	10001	*	chr1	184690000	184700000	10001	*	TRUE	TRUE	TRUE	TRUE	5.83297	loop_1636	630000	10.7083	23	-0.0842404	0.517992	0.602232	0.268838	FALSE	FALSE	FALSE	23	17	17	20	6	9	4	3	15	8	10	14	4	5	5	7	8	9	7	8	11	16	16	15
chr1	184240000	184250000	10001	*	chr1	184680000	184690000	10001	*	TRUE	TRUE	TRUE	TRUE	3.45929	loop_1637	450000	8.79167	19	-0.321119	-0.521985	-0.200866	0.502115	FALSE	FALSE	FALSE	19	14	14	18	8	16	7	6	11	7	7	8	12	4	8	3	3	6	3	10	6	4	7	10
chr1	184250000	184260000	10001	*	chr1	184570000	184580000	10001	*	TRUE	FALSE	FALSE	TRUE	2.40062	loop_1638	330000	6.58333	21	0.0162702	-0.646532	-0.662802	0.417531	FALSE	FALSE	FALSE	21	8	10	14	7	3	8	2	12	5	9	7	3	6	4	7	3	1	2	4	6	1	7	8
chr1	184360000	184370000	10001	*	chr1	184660000	184670000	10001	*	FALSE	TRUE	TRUE	TRUE	2.57687	loop_1639	310000	6.5	13	0.284795	0.760625	0.47583	0.284721	FALSE	FALSE	FALSE	13	7	6	9	3	4	6	3	11	8	5	4	4	6	4	4	4	4	8	7	13	6	10	7
chr1	184370000	184380000	10001	*	chr1	184550000	184560000	10001	*	TRUE	FALSE	FALSE	FALSE	2.33017	loop_1640	190000	7.5	21	-0.204979	0.0477907	0.25277	0.867141	FALSE	FALSE	FALSE	21	10	11	11	8	7	5	4	5	8	5	6	6	8	6	4	6	4	4	8	9	12	3	9
chr1	184560000	184570000	10001	*	chr1	184660000	184670000	10001	*	TRUE	TRUE	FALSE	TRUE	2.74313	loop_1641	110000	13.4583	29	-0.254068	-0.278954	-0.0248858	0.702744	FALSE	FALSE	FALSE	22	27	17	29	17	16	9	10	14	15	19	17	2	8	9	9	12	5	11	4	18	5	12	16
chr1	184790000	184800000	10001	*	chr1	185670000	185680000	10001	*	TRUE	FALSE	TRUE	TRUE	3.40066	loop_1642	890000	2.66667	6	0.231327	0.579368	0.348041	0.772265	FALSE	FALSE	FALSE	3	4	2	6	5	0	2	0	5	2	3	4	1	0	4	1	2	2	3	2	5	3	4	1
chr1	184800000	184810000	10001	*	chr1	184980000	184990000	10001	*	TRUE	TRUE	TRUE	TRUE	7.44243	loop_1643	190000	23.4167	50	-0.400888	-0.185613	0.215274	0.335114	FALSE	FALSE	FALSE	47	46	42	50	18	18	25	16	27	25	11	24	15	17	16	10	14	15	14	16	32	21	21	22
chr1	184800000	184810000	10001	*	chr1	185160000	185170000	10001	*	TRUE	TRUE	TRUE	TRUE	5.41117	loop_1644	370000	8.79167	17	-0.0564992	0.148622	0.205121	0.903402	FALSE	FALSE	FALSE	10	17	13	15	9	8	8	6	12	10	14	2	7	9	2	6	9	10	8	7	3	11	7	8
chr1	184820000	184830000	10001	*	chr1	185700000	185710000	10001	*	FALSE	TRUE	FALSE	FALSE	4.43969	loop_1645	890000	2.54167	6	0.777148	0.318987	-0.45816	0.604787	FALSE	FALSE	FALSE	4	5	3	3	2	1	1	1	3	6	4	3	2	3	3	1	5	3	1	0	3	1	2	1
chr1	184980000	184990000	10001	*	chr1	185170000	185180000	10001	*	TRUE	TRUE	TRUE	TRUE	2.78763	loop_1646	200000	6.54167	18	-0.137167	0.313779	0.450946	0.701715	FALSE	FALSE	FALSE	18	12	15	7	4	2	5	2	9	5	7	6	4	1	5	5	2	8	5	4	9	8	10	4
chr1	184980000	184990000	10001	*	chr1	185670000	185680000	10001	*	TRUE	FALSE	TRUE	TRUE	3.46515	loop_1647	700000	3.91667	10	0.184608	-0.0127923	-0.1974	0.94613	FALSE	FALSE	FALSE	6	7	6	10	3	3	2	1	3	8	6	3	5	5	1	1	2	3	4	2	4	4	3	2
chr1	185040000	185050000	10001	*	chr1	185150000	185160000	10001	*	FALSE	TRUE	FALSE	FALSE	2.23193	loop_1648	120000	7.25	15	0.0314399	-0.0859665	-0.117406	0.972458	FALSE	FALSE	FALSE	15	13	8	7	8	7	6	7	3	14	12	8	2	6	5	6	4	6	4	5	3	11	9	5
chr1	185210000	185220000	10001	*	chr1	186210000	186220000	10001	*	FALSE	FALSE	FALSE	TRUE	2.61105	loop_1649	1010000	1.25	3	0.157917	-0.250319	-0.408236	0.94394	FALSE	FALSE	FALSE	2	1	1	2	3	2	1	0	0	2	1	3	1	1	0	2	1	0	1	0	2	2	0	2
chr1	185240000	185250000	10001	*	chr1	185670000	185680000	10001	*	TRUE	TRUE	TRUE	TRUE	3.27629	loop_1650	440000	8.29167	19	-0.429024	-0.279849	0.149175	0.622334	FALSE	FALSE	FALSE	16	18	19	18	5	6	4	10	9	8	4	16	0	6	6	4	8	4	3	6	7	6	7	9
chr1	185310000	185320000	10001	*	chr1	185560000	185570000	10001	*	TRUE	TRUE	FALSE	TRUE	2.71188	loop_1651	260000	12.2917	28	0.444617	-0.447241	-0.891858	0.0517104	FALSE	FALSE	FALSE	20	20	23	15	6	10	15	8	22	24	28	21	5	5	10	8	5	6	7	6	7	7	10	7
chr1	185310000	185320000	10001	*	chr1	185590000	185600000	10001	*	TRUE	FALSE	TRUE	FALSE	2.75928	loop_1652	290000	9.91667	23	0.0561716	0.129265	0.0730935	0.959281	FALSE	FALSE	FALSE	16	23	15	13	9	4	10	5	16	7	9	16	4	8	3	10	4	12	5	5	18	6	9	11
chr1	185310000	185320000	10001	*	chr1	185670000	185680000	10001	*	TRUE	TRUE	TRUE	TRUE	3.26956	loop_1653	370000	10.4583	23	0.264427	-0.00527236	-0.269699	0.748584	FALSE	FALSE	FALSE	21	23	15	12	8	5	7	8	12	19	17	10	8	9	8	5	6	4	7	10	9	8	10	10
chr1	185320000	185330000	10001	*	chr1	185440000	185450000	10001	*	TRUE	FALSE	FALSE	TRUE	2.14309	loop_1654	130000	7.875	16	-0.169012	-0.544218	-0.375206	0.540418	FALSE	FALSE	FALSE	8	16	14	14	6	10	7	12	11	10	13	4	6	8	6	1	5	2	3	5	14	5	3	6
chr1	185430000	185440000	10001	*	chr1	185660000	185670000	10001	*	TRUE	FALSE	FALSE	FALSE	2.22976	loop_1655	240000	6.125	16	-0.814417	-0.734388	0.080029	0.176481	FALSE	FALSE	FALSE	16	11	10	10	4	9	9	10	5	5	7	5	2	5	5	0	4	0	4	4	5	4	7	6
chr1	185460000	185470000	10001	*	chr1	185670000	185680000	10001	*	FALSE	FALSE	TRUE	FALSE	2.48191	loop_1656	220000	6.25	14	-0.0338918	0.316047	0.349938	0.777688	FALSE	FALSE	FALSE	8	11	4	14	4	7	4	6	6	12	2	8	6	3	5	0	3	5	2	7	12	5	7	9
chr1	185590000	185600000	10001	*	chr1	185660000	185670000	10001	*	TRUE	FALSE	TRUE	TRUE	2.33912	loop_1657	80000	10.875	23	-0.0753153	0.262621	0.337936	0.686109	FALSE	FALSE	FALSE	16	23	16	22	8	7	7	7	11	9	10	13	11	7	7	5	13	11	7	10	13	7	10	11
chr1	185720000	185730000	10001	*	chr1	186150000	186160000	10001	*	FALSE	TRUE	FALSE	TRUE	2.77838	loop_1658	440000	5.375	15	0.89379	0.501373	-0.392416	0.304	FALSE	FALSE	FALSE	3	6	8	15	2	2	2	2	8	8	8	5	10	5	2	6	7	6	1	2	8	3	5	5
chr1	185720000	185730000	10001	*	chr1	186210000	186220000	10001	*	TRUE	TRUE	TRUE	TRUE	4.49308	loop_1659	500000	8.45833	20	0.108114	0.0576378	-0.0504761	0.971251	FALSE	FALSE	FALSE	20	10	14	17	6	2	4	10	8	7	10	18	8	3	6	5	5	10	2	5	10	8	7	8
chr1	185810000	185820000	10001	*	chr1	186150000	186160000	10001	*	TRUE	TRUE	TRUE	TRUE	3.07656	loop_1660	350000	9.91667	24	-0.145151	-0.684708	-0.539557	0.279848	FALSE	FALSE	FALSE	19	22	24	19	4	11	6	11	10	14	8	15	6	10	11	2	7	6	5	5	8	9	4	2
chr1	185810000	185820000	10001	*	chr1	186210000	186220000	10001	*	TRUE	TRUE	TRUE	TRUE	5.40299	loop_1661	410000	14.375	32	-0.0544195	0.114325	0.168744	0.889585	FALSE	FALSE	FALSE	30	32	19	23	12	9	8	10	25	18	14	15	12	9	5	5	12	7	10	12	16	16	13	13
chr1	185960000	185970000	10001	*	chr1	186210000	186220000	10001	*	FALSE	FALSE	TRUE	FALSE	2.20844	loop_1662	260000	3.95833	11	0.357179	0.471944	0.114765	0.761031	FALSE	FALSE	FALSE	11	3	6	5	2	3	3	0	1	4	6	5	4	4	4	2	3	2	1	3	7	6	5	5
chr1	186150000	186160000	10001	*	chr1	186210000	186220000	10001	*	TRUE	TRUE	TRUE	TRUE	3.66228	loop_1663	70000	14.9167	31	-0.198515	-0.296849	-0.0983345	0.649438	FALSE	FALSE	FALSE	27	21	31	26	17	14	12	14	21	18	14	19	9	10	8	7	11	7	9	7	13	12	16	15
chr1	186320000	186330000	10001	*	chr1	186360000	186370000	10001	*	FALSE	TRUE	FALSE	TRUE	2.56842	loop_1664	50000	18.5	41	-0.204774	0.0563011	0.261075	0.688577	FALSE	FALSE	FALSE	41	31	29	25	19	17	12	15	25	22	19	25	10	8	8	7	13	12	11	13	23	26	16	17
chr1	186480000	186490000	10001	*	chr1	186600000	186610000	10001	*	TRUE	TRUE	TRUE	TRUE	3.32269	loop_1665	130000	15.0417	36	-0.551954	-0.106643	0.445311	0.258065	FALSE	FALSE	FALSE	31	35	32	36	8	10	7	15	20	15	17	16	8	2	6	4	9	9	5	15	9	14	18	20
chr1	186480000	186490000	10001	*	chr1	186680000	186690000	10001	*	TRUE	TRUE	TRUE	TRUE	4.02023	loop_1666	210000	12.2083	37	-0.937719	-0.621776	0.315943	0.054941	FALSE	FALSE	FALSE	37	25	23	36	7	9	19	7	16	12	11	7	6	3	4	4	7	4	2	12	5	18	7	12
chr1	186480000	186490000	10001	*	chr1	186980000	186990000	10001	*	TRUE	TRUE	TRUE	TRUE	5.729	loop_1667	510000	13.25	29	0.0369091	0.301493	0.264584	0.679869	FALSE	FALSE	FALSE	29	22	23	24	4	11	5	9	16	24	16	9	7	6	8	9	14	13	8	13	19	11	7	11
chr1	186490000	186500000	10001	*	chr1	186550000	186560000	10001	*	FALSE	FALSE	TRUE	FALSE	2.00746	loop_1668	70000	11	28	-0.27789	0.365327	0.643217	0.286481	FALSE	FALSE	FALSE	28	23	16	17	6	9	7	4	13	12	7	13	3	7	4	7	8	12	13	5	16	10	11	13
chr1	186600000	186610000	10001	*	chr1	186680000	186690000	10001	*	TRUE	TRUE	FALSE	TRUE	2.63822	loop_1669	90000	12.7917	32	-0.248259	-0.611412	-0.363153	0.258465	FALSE	FALSE	FALSE	32	17	25	27	10	15	8	15	12	19	16	13	6	12	6	9	6	10	7	5	12	10	5	10
chr1	186600000	186610000	10001	*	chr1	186800000	186810000	10001	*	FALSE	FALSE	FALSE	TRUE	2.25686	loop_1670	210000	6.375	16	-0.322247	-0.0822925	0.239954	0.820516	FALSE	FALSE	FALSE	16	12	10	10	4	2	8	7	8	5	11	8	4	3	0	3	5	4	3	6	7	9	2	6
chr1	186600000	186610000	10001	*	chr1	186980000	186990000	10001	*	TRUE	TRUE	TRUE	TRUE	5.92734	loop_1671	390000	16.1667	34	-0.0559079	0.0587544	0.114662	0.947235	FALSE	FALSE	FALSE	28	33	27	34	7	14	9	13	16	18	18	13	13	9	12	14	17	10	14	12	15	15	10	17
chr1	186670000	186680000	10001	*	chr1	186980000	186990000	10001	*	FALSE	FALSE	TRUE	FALSE	2.20197	loop_1672	320000	8.20833	18	0.177613	0.324632	0.147018	0.776554	FALSE	FALSE	FALSE	17	12	11	18	4	3	6	5	10	6	10	14	7	4	5	6	4	12	6	8	8	6	4	11
chr1	186720000	186730000	10001	*	chr1	186980000	186990000	10001	*	TRUE	TRUE	FALSE	TRUE	3.91201	loop_1673	270000	9.45833	27	-0.104851	-0.210482	-0.105631	0.898352	FALSE	FALSE	FALSE	17	11	12	27	7	6	8	11	11	17	13	8	6	6	8	1	6	3	7	4	10	15	8	5
chr1	186810000	186820000	10001	*	chr1	186980000	186990000	10001	*	FALSE	TRUE	FALSE	TRUE	2.54908	loop_1674	180000	7.29167	15	-0.117025	-0.107199	0.00982512	0.960709	FALSE	FALSE	FALSE	10	11	15	13	8	7	6	5	11	10	3	10	6	2	6	4	4	6	3	5	7	10	5	8
chr1	186910000	186920000	10001	*	chr1	186980000	186990000	10001	*	TRUE	FALSE	TRUE	TRUE	2.57228	loop_1675	80000	11	24	-0.338184	0.400915	0.739099	0.180541	FALSE	FALSE	FALSE	17	19	18	24	4	7	10	10	15	10	8	6	3	7	6	8	13	10	10	12	15	14	10	8
chr1	187050000	187060000	10001	*	chr1	187260000	187270000	10001	*	FALSE	FALSE	TRUE	TRUE	2.79074	loop_1676	220000	6.625	15	-0.947904	-0.318697	0.629207	0.176737	FALSE	FALSE	FALSE	15	15	11	11	9	5	7	8	2	4	2	11	1	4	2	6	3	5	5	4	5	6	8	10
chr1	187050000	187060000	10001	*	chr1	187380000	187390000	10001	*	FALSE	FALSE	TRUE	FALSE	3.79116	loop_1677	340000	3.95833	11	-0.543602	0.485757	1.02936	0.371271	FALSE	FALSE	FALSE	9	6	5	11	1	3	4	1	10	1	4	1	2	1	0	2	4	2	3	6	4	9	2	4
chr1	187050000	187060000	10001	*	chr1	187910000	187920000	10001	*	TRUE	FALSE	FALSE	TRUE	3.12793	loop_1678	870000	2.625	8	-0.488092	-0.560516	-0.0724242	0.746271	FALSE	FALSE	FALSE	5	5	8	6	3	0	4	1	2	3	3	4	1	3	0	1	0	2	1	2	2	4	1	2
chr1	187050000	187060000	10001	*	chr1	188210000	188220000	10001	*	FALSE	FALSE	TRUE	FALSE	2.6944	loop_1679	1170000	1.5	5	-1.36148	0.837485	2.19897	0.175096	FALSE	FALSE	FALSE	2	4	5	2	0	1	0	1	1	1	0	1	0	0	1	0	2	2	0	1	5	2	1	4
chr1	187060000	187070000	10001	*	chr1	187230000	187240000	10001	*	TRUE	FALSE	FALSE	FALSE	2.37937	loop_1680	180000	5.58333	15	-0.771325	-0.176429	0.594896	0.35344	FALSE	FALSE	FALSE	15	13	9	10	5	4	4	7	4	6	2	6	4	2	1	4	4	7	5	3	6	5	5	3
chr1	187060000	187070000	10001	*	chr1	188710000	188720000	10001	*	FALSE	FALSE	TRUE	TRUE	3.04591	loop_1681	1660000	1.95833	4	0.351113	0.80131	0.450197	0.666922	FALSE	FALSE	FALSE	3	2	2	3	2	2	1	0	2	3	1	2	1	1	2	2	4	3	0	1	3	2	2	3
chr1	187070000	187080000	10001	*	chr1	187790000	187800000	10001	*	FALSE	FALSE	TRUE	TRUE	2.99865	loop_1682	730000	1.41667	4	-1.4743	0.52992	2.00422	0.247742	FALSE	FALSE	FALSE	4	2	3	1	0	2	0	3	0	1	2	0	0	0	1	0	2	0	2	1	2	3	2	3
chr1	187250000	187260000	10001	*	chr1	187920000	187930000	10001	*	FALSE	FALSE	FALSE	TRUE	2.24999	loop_1683	680000	2.79167	6	-0.203951	-0.279627	-0.0756766	0.935193	FALSE	FALSE	FALSE	5	6	5	1	4	1	2	5	4	6	1	1	1	0	4	2	1	0	1	1	3	4	6	3
chr1	187410000	187420000	10001	*	chr1	188120000	188130000	10001	*	FALSE	TRUE	FALSE	FALSE	2.32303	loop_1684	720000	3.91667	8	0.454052	0.211464	-0.242588	0.773001	FALSE	FALSE	FALSE	3	6	2	7	4	2	6	3	5	8	3	6	3	1	3	5	3	2	4	2	3	4	5	4
chr1	187410000	187420000	10001	*	chr1	188930000	188940000	10001	*	FALSE	FALSE	FALSE	TRUE	2.67216	loop_1685	1530000	2.25	7	0.158461	0.791344	0.632883	0.623129	FALSE	FALSE	FALSE	3	7	2	3	0	2	1	1	2	4	1	2	1	0	4	1	3	2	2	3	5	1	2	2
chr1	187470000	187480000	10001	*	chr1	187910000	187920000	10001	*	FALSE	FALSE	FALSE	TRUE	2.01728	loop_1686	450000	5.16667	15	-0.00670463	-0.417133	-0.410428	0.77543	FALSE	FALSE	FALSE	14	7	5	15	4	3	3	6	6	5	10	1	1	8	4	4	5	3	3	2	6	0	3	6
chr1	187930000	187940000	10001	*	chr1	188940000	188950000	10001	*	TRUE	FALSE	FALSE	TRUE	2.80807	loop_1687	1020000	1.375	5	-1.97778	-1.18466	0.793123	0.186632	FALSE	FALSE	FALSE	4	3	2	5	3	1	2	2	1	0	0	0	0	1	1	1	2	0	0	1	1	1	1	1
chr1	187930000	187940000	10001	*	chr1	188120000	188130000	10001	*	TRUE	TRUE	FALSE	FALSE	2.60928	loop_1688	200000	5.25	14	-0.287463	-0.674854	-0.387391	0.560387	FALSE	FALSE	FALSE	11	14	12	8	2	5	9	3	5	1	6	3	5	7	3	6	6	4	1	5	3	2	2	3
chr1	187930000	187940000	10001	*	chr1	188590000	188600000	10001	*	FALSE	FALSE	FALSE	TRUE	2.29798	loop_1689	670000	2.79167	11	-0.29202	-0.462888	-0.170867	0.849481	FALSE	FALSE	FALSE	5	3	11	4	3	2	3	1	1	5	3	6	2	1	1	1	3	1	0	2	1	4	0	4
chr1	188780000	188790000	10001	*	chr1	188930000	188940000	10001	*	FALSE	FALSE	TRUE	FALSE	2.90498	loop_1690	160000	6.25	17	-0.587768	0.868602	1.45637	0.0121035	TRUE	TRUE	TRUE	11	17	11	5	4	3	5	2	5	13	3	4	2	1	2	0	7	10	5	8	10	7	8	7
chr1	189430000	189440000	10001	*	chr1	190320000	190330000	10001	*	TRUE	FALSE	FALSE	TRUE	2.46958	loop_1691	900000	4.16667	12	-1.14691	-0.107716	1.0392	0.191817	FALSE	FALSE	FALSE	9	12	9	12	3	4	3	1	6	3	2	3	0	2	1	1	2	4	4	4	7	4	0	4
chr1	189430000	189440000	10001	*	chr1	190370000	190380000	10001	*	FALSE	TRUE	TRUE	FALSE	3.46658	loop_1692	950000	4.16667	9	0.717866	0.636644	-0.0812216	0.566547	FALSE	FALSE	FALSE	8	6	4	9	0	2	1	3	8	9	2	2	0	4	8	3	7	0	1	7	3	4	6	3
chr1	189430000	189440000	10001	*	chr1	190430000	190440000	10001	*	FALSE	FALSE	TRUE	TRUE	2.68102	loop_1693	1010000	3.33333	9	-0.467519	-0.0528777	0.414641	0.798874	FALSE	FALSE	FALSE	7	5	8	9	2	2	3	1	4	3	4	4	1	2	1	1	6	1	1	2	8	2	3	0
chr1	189430000	189440000	10001	*	chr1	189680000	189690000	10001	*	TRUE	FALSE	TRUE	TRUE	2.68963	loop_1694	260000	4.91667	13	-0.0715784	0.218573	0.290151	0.896965	FALSE	FALSE	FALSE	8	8	10	13	3	0	1	6	6	3	8	4	4	4	2	2	2	8	3	1	4	9	5	4
chr1	189430000	189440000	10001	*	chr1	189870000	189880000	10001	*	TRUE	FALSE	FALSE	FALSE	2.59615	loop_1695	450000	3.20833	9	-0.809554	-0.231697	0.577857	0.538333	FALSE	FALSE	FALSE	7	9	7	4	3	3	4	1	4	3	2	1	1	1	2	2	3	1	0	1	5	5	5	3
chr1	189430000	189440000	10001	*	chr1	190070000	190080000	10001	*	FALSE	FALSE	FALSE	TRUE	2.20548	loop_1696	650000	2.79167	10	-0.0740149	-0.603842	-0.529827	0.757937	FALSE	FALSE	FALSE	9	6	10	2	2	0	3	1	2	3	4	3	1	3	2	3	2	1	2	2	0	1	4	1
chr1	189430000	189440000	10001	*	chr1	190120000	190130000	10001	*	TRUE	FALSE	FALSE	FALSE	3.16863	loop_1697	700000	2.5	8	-1.30775	-1.33768	-0.0299292	0.144339	FALSE	FALSE	FALSE	7	5	8	2	1	8	4	3	2	0	2	2	1	3	0	1	1	1	0	1	1	2	4	1
chr1	189620000	189630000	10001	*	chr1	190320000	190330000	10001	*	TRUE	FALSE	FALSE	FALSE	2.56267	loop_1698	710000	3.125	14	-1.6103	-1.2633	0.346994	0.0436052	FALSE	FALSE	FALSE	14	8	2	11	4	4	3	4	3	0	2	3	1	1	1	1	3	2	2	1	2	2	0	1
chr1	189710000	189720000	10001	*	chr1	190310000	190320000	10001	*	FALSE	FALSE	FALSE	TRUE	2.29381	loop_1699	610000	3.83333	11	-0.12206	-0.882451	-0.760391	0.471019	FALSE	FALSE	FALSE	9	11	8	9	2	2	2	3	1	4	2	6	5	4	4	3	0	0	5	1	1	2	3	5
chr1	189850000	189860000	10001	*	chr1	190320000	190330000	10001	*	TRUE	TRUE	FALSE	TRUE	2.31397	loop_1700	480000	4.5	11	-0.404598	-0.0510616	0.353537	0.791257	FALSE	FALSE	FALSE	9	9	9	11	2	5	2	3	4	4	6	10	2	0	2	1	0	6	2	5	5	3	4	4
chr1	189860000	189870000	10001	*	chr1	190360000	190370000	10001	*	FALSE	FALSE	TRUE	FALSE	3.36138	loop_1701	510000	3.41667	10	-0.212591	0.642003	0.854594	0.447221	FALSE	FALSE	FALSE	8	6	4	3	3	2	2	2	4	2	2	4	1	3	1	2	2	1	4	3	10	4	4	5
chr1	190960000	190970000	10001	*	chr1	194580000	194590000	10001	*	FALSE	TRUE	FALSE	FALSE	3.28316	loop_1702	3630000	0.333333	2	1.87599	0.536268	-1.33972	0.549775	FALSE	FALSE	FALSE	0	1	0	0	0	0	0	0	2	1	1	1	0	1	0	0	0	0	0	1	0	0	0	0
chr1	191130000	191140000	10001	*	chr1	192440000	192450000	10001	*	FALSE	FALSE	TRUE	TRUE	2.65866	loop_1703	1320000	1.875	7	-1.49373	0.0284012	1.52213	0.298349	FALSE	FALSE	FALSE	3	7	6	4	1	2	0	1	0	1	2	1	1	0	1	0	1	2	0	1	4	1	3	3
chr1	191990000	192000000	10001	*	chr1	192300000	192310000	10001	*	TRUE	FALSE	FALSE	TRUE	2.35579	loop_1704	320000	4.25	15	-1.16264	-0.837285	0.325359	0.162339	FALSE	FALSE	FALSE	10	11	13	15	0	6	3	3	3	1	4	3	1	1	3	3	2	1	0	3	4	3	2	7
chr1	191990000	192000000	10001	*	chr1	192440000	192450000	10001	*	TRUE	FALSE	FALSE	TRUE	3.21446	loop_1705	460000	4.41667	15	-0.58334	-0.0566773	0.526663	0.647042	FALSE	FALSE	FALSE	15	13	7	6	2	3	2	3	3	8	4	1	0	5	2	2	4	4	2	1	2	4	6	7
chr1	192320000	192330000	10001	*	chr1	192440000	192450000	10001	*	TRUE	FALSE	FALSE	TRUE	3.31742	loop_1706	130000	7.33333	18	-0.377359	-0.781927	-0.404568	0.275607	FALSE	FALSE	FALSE	14	18	13	13	6	9	4	12	6	12	13	9	1	6	3	3	4	4	4	2	5	4	8	3
chr1	192470000	192480000	10001	*	chr1	192610000	192620000	10001	*	TRUE	TRUE	TRUE	TRUE	7.84185	loop_1707	150000	17.5	40	-0.00732165	0.478742	0.486064	0.205894	FALSE	FALSE	FALSE	40	22	31	25	7	12	9	15	26	16	16	22	9	8	11	10	16	10	17	27	22	19	16	14
chr1	192470000	192480000	10001	*	chr1	192800000	192810000	10001	*	TRUE	TRUE	TRUE	TRUE	4.98299	loop_1708	340000	7.83333	20	-0.243342	-0.160566	0.082776	0.879342	FALSE	FALSE	FALSE	20	4	18	18	7	4	8	7	8	14	3	9	5	4	7	2	3	4	10	5	6	6	10	6
chr1	192470000	192480000	10001	*	chr1	193020000	193030000	10001	*	TRUE	TRUE	TRUE	TRUE	8.11187	loop_1709	560000	9.625	15	0.409762	0.659965	0.250203	0.265244	FALSE	FALSE	FALSE	14	10	15	15	5	6	7	5	13	15	6	7	11	6	6	10	10	9	13	8	11	8	9	12
chr1	192610000	192620000	10001	*	chr1	193020000	193030000	10001	*	TRUE	TRUE	TRUE	TRUE	4.43717	loop_1710	420000	6.41667	14	-0.213915	-0.391229	-0.177314	0.758799	FALSE	FALSE	FALSE	14	13	14	12	6	2	3	8	7	7	12	6	4	5	4	1	3	4	1	3	6	6	6	7
chr1	192630000	192640000	10001	*	chr1	192790000	192800000	10001	*	TRUE	TRUE	TRUE	TRUE	2.73064	loop_1711	170000	8.41667	19	-0.0721675	-0.325205	-0.253038	0.783976	FALSE	FALSE	FALSE	19	9	18	19	11	7	5	3	12	7	12	11	3	2	9	8	3	6	4	7	4	8	8	7
chr1	192800000	192810000	10001	*	chr1	192900000	192910000	10001	*	TRUE	FALSE	FALSE	FALSE	2.75407	loop_1712	110000	10.5	21	-0.00944087	-0.695431	-0.68599	0.177481	FALSE	FALSE	FALSE	21	16	18	17	11	6	10	17	15	8	10	15	12	11	8	6	8	5	2	6	6	8	4	12
chr1	192800000	192810000	10001	*	chr1	193020000	193030000	10001	*	TRUE	TRUE	TRUE	TRUE	7.82301	loop_1713	230000	22.125	47	-0.199218	-0.680687	-0.48147	0.0423439	FALSE	FALSE	FALSE	47	42	42	42	24	12	27	21	29	28	20	24	18	20	14	12	10	9	11	15	24	14	13	13
chr1	193060000	193070000	10001	*	chr1	193100000	193110000	10001	*	TRUE	FALSE	TRUE	TRUE	2.58802	loop_1714	50000	16.1667	36	-0.305131	-0.0356419	0.26949	0.608278	FALSE	FALSE	FALSE	36	23	30	26	14	14	12	17	15	16	12	22	14	10	7	7	12	7	11	17	16	16	19	15
chr1	193180000	193190000	10001	*	chr1	193280000	193290000	10001	*	FALSE	TRUE	FALSE	FALSE	2.26299	loop_1715	110000	6.83333	13	0.434356	0.0260411	-0.408315	0.604428	FALSE	FALSE	FALSE	11	10	13	12	4	7	2	3	10	13	7	8	4	8	4	7	4	2	7	4	7	6	4	7
chr1	193180000	193190000	10001	*	chr1	193330000	193340000	10001	*	TRUE	FALSE	TRUE	TRUE	2.94111	loop_1716	160000	8.95833	22	-0.35159	-0.707647	-0.356057	0.309632	FALSE	FALSE	FALSE	17	18	22	22	10	8	6	5	11	12	11	16	7	2	3	2	3	2	4	1	5	10	7	11
chr1	193180000	193190000	10001	*	chr1	193410000	193420000	10001	*	FALSE	TRUE	FALSE	FALSE	3.96973	loop_1717	240000	5.25	11	0.223933	0.547725	0.323792	0.622325	FALSE	FALSE	FALSE	9	9	8	8	4	2	1	4	5	7	11	4	3	2	3	4	4	5	5	4	11	5	6	2
chr1	193180000	193190000	10001	*	chr1	193550000	193560000	10001	*	FALSE	TRUE	FALSE	TRUE	2.51512	loop_1718	380000	3.5	8	-0.24693	0.275946	0.522876	0.78504	FALSE	FALSE	FALSE	8	4	6	3	3	3	3	4	6	2	5	2	0	2	4	1	1	6	2	4	6	7	1	1
chr1	193180000	193190000	10001	*	chr1	193710000	193720000	10001	*	TRUE	FALSE	FALSE	TRUE	3.04804	loop_1719	540000	2.08333	6	-0.21589	0.517156	0.733046	0.738259	FALSE	FALSE	FALSE	5	1	0	4	3	3	2	1	4	0	1	3	1	0	2	2	1	2	3	6	2	1	3	0
[truncated: 27,486 more rows]
[truncated: 10 more columns]
