# Supplementary material for: Genome reorganization and its functional impact during breast cancer progression
Source: bioRxiv preprint, doi:10.1101/2025.05.14.654144, version 5 (2026-05-23)
Supplement: Supplemental Table 4 [file 654144_file22.xlsx]

## Sheet: TableS4-TADbounds
seqnames	start	end	MCF10_A_1_1	MCF10_A_1_2	MCF10_A_1_3	MCF10_A_1_4	MCF10_A_2_1	MCF10_A_2_2	MCF10_A_2_3	MCF10_A_2_4	MCF10_T_1_1	MCF10_T_1_2	MCF10_T_1_3	MCF10_T_1_4	MCF10_T_2_1	MCF10_T_2_2	MCF10_T_2_3	MCF10_T_2_4	MCF10_C_1_1	MCF10_C_1_2	MCF10_C_1_3	MCF10_C_1_4	MCF10_C_2_1	MCF10_C_2_2	MCF10_C_2_3	MCF10_C_2_4	ATpadj	ATdiff	ATsig	TCpadj	TCdiff	TCsig	ACpadj	ACdiff	ACsig	sig	cluster	A_IS	T_IS	C_IS	A_ZSCR	T_ZSCR	C_ZSCR	max_ZSCR
chr1	810001	820000	-0.120325	-0.247386	0.752857	0.534332	0.0369799	-0.047836	-2.48577	0.934796	-0.425067	-0.806679	1.22727	-0.394221	-0.206006	0.0739288	-0.400253	-0.500857	-1.83585	0.0162079	0.723662	-2.63822	0.247241	1.16596	0.299687	-0.114813	0.907313	-0.0986912	FALSE	0.922306	-0.0880312	FALSE	0.841212	-0.186722	FALSE	FALSE	static	0.163506	-0.409903	-0.00661132	0.841569	-1.10549	0.263921	0.841569
chr1	1090001	1100000	-0.0438457	-0.0435628	0.171115	0.170625	0.0741565	-0.0264441	-0.0888682	0.074024	0.0715271	0.230538	0.12353	0.103998	0.234359	-0.01994	0.175444	0.0899412	-0.0563354	0.198052	-0.0555446	0.0624219	0.313195	0.169362	0.371874	0.331682	0.218045	0.0902748	FALSE	0.711253	0.0406635	FALSE	0.18479	0.130938	FALSE	FALSE	static	-0.0188443	0.159387	0.141075	-1.14965	0.668214	0.48144	0.668214
chr1	1490001	1500000	0.258663	0.21609	0.0764467	-0.0550443	0.120771	0.101304	0.0264523	0.048268	0.174238	0.184424	0.28442	-0.0434208	0.1575	0.0540417	0.171201	0.424959	0.105564	-0.120455	-0.0816234	-0.0701182	-0.0565721	0.227037	0.0747756	0.268582	0.43098	0.0768013	FALSE	0.208544	-0.132521	FALSE	0.543576	-0.0557201	FALSE	FALSE	static	0.0874209	0.197318	0.0650853	-0.412344	1.14024	-0.727894	1.14024
chr1	1510001	1520000	0.169405	0.0291454	-0.0278398	-0.160453	0.0596336	0.0278809	-0.0396468	0.0482688	0.11237	0.00106941	0.213363	-0.0682853	0.216328	-0.0840103	0.144975	0.32263	-0.0435887	-0.0669731	0.0912365	-0.0961571	-0.0407169	0.218353	0.0574481	0.0644506	0.33297	0.0940057	FALSE	0.377007	-0.0842984	FALSE	0.904669	0.00970727	FALSE	FALSE	static	0.00636594	0.124381	0.0360444	-0.801954	1.12046	-0.318504	1.12046
chr1	1710001	1720000	-0.0756754	-0.19197	0.347107	0.573144	-0.0540651	-0.30403	0.0214123	0.0144138	0.274706	0.269568	0.187953	0.36963	-0.020698	0.101698	0.322947	0.0666664	-0.474418	-0.1645	0.0208411	-0.282304	0.358524	0.21076	-0.25442	-0.0490389	0.388528	0.155267	FALSE	0.0956853	-0.275878	FALSE	0.548867	-0.120612	FALSE	FALSE	static	0.0690556	0.241984	-0.00649204	-0.254832	1.10276	-0.847928	1.10276
chr1	1910001	1920000	-1.34992	-1.07752	-0.789527	-1.13487	-0.632801	-0.671711	-0.67092	-0.852222	-1.10577	-0.898694	-0.935204	-0.673752	-0.844531	-0.891407	-0.846969	-1.15573	-0.896306	-0.748137	-1.00775	-0.757182	-0.885583	-0.685974	-0.605988	-0.630975	0.915853	-0.0215709	FALSE	0.186923	0.14177	FALSE	0.42518	0.120199	FALSE	FALSE	static	-0.907488	-0.878405	-0.809151	-0.840762	-0.265068	1.10583	1.10583
chr1	1920001	1930000	-1.20824	-1.08546	-0.854522	-1.14917	-0.677649	-0.74637	-0.613314	-0.826376	-1.11997	-0.765362	-0.973124	-0.72386	-0.793436	-0.882427	-0.834295	-1.10467	-0.863344	-0.744454	-1.11224	-0.735344	-0.829504	-0.666352	-0.63767	-0.675082	0.979529	-0.00450442	FALSE	0.301027	0.116644	FALSE	0.414294	0.11214	FALSE	FALSE	static	-0.911521	-0.860982	-0.834507	-1.08661	0.204995	0.881618	0.881618
chr1	2180001	2190000	-0.967687	-0.598767	-0.613137	-0.902502	-0.736856	-0.6699	-0.531324	-0.529136	-0.584981	-0.517848	-0.739798	-0.719846	-0.489702	-0.527469	-0.471863	-0.36084	-0.51577	-0.571718	-0.626673	-0.546775	-0.476191	-0.450749	-0.456669	-0.389107	0.218814	0.14212	FALSE	0.566996	0.0473371	FALSE	0.0511279	0.189457	FALSE	FALSE	static	-0.660133	-0.554951	-0.493042	-1.07438	0.170758	0.903626	0.903626
chr1	2190001	2200000	-0.901885	-0.565717	-0.549111	-0.843953	-0.659633	-0.699597	-0.489677	-0.476009	-0.490512	-0.463778	-0.6487	-0.754589	-0.476924	-0.455433	-0.45795	-0.328607	-0.527928	-0.501911	-0.644786	-0.571224	-0.434876	-0.451209	-0.518032	-0.330704	0.225489	0.138636	FALSE	0.905769	0.0119778	FALSE	0.106767	0.150614	FALSE	FALSE	static	-0.62882	-0.513791	-0.482627	-1.13081	0.363041	0.767769	0.767769
chr1	2360001	2370000	-0.295308	-0.204202	-0.217786	-0.27502	-0.311888	-0.299447	-0.186237	-0.191751	-0.163948	-0.276707	-0.054864	-0.199418	-0.164245	-0.682023	-0.0761916	-0.126311	-0.263686	-0.3267	-0.246637	-0.206515	-0.171643	-0.140625	-0.19633	-0.200072	0.824671	0.0297415	FALSE	0.994478	-0.00106255	FALSE	0.4696	0.0286789	FALSE	FALSE	static	-0.251205	-0.162684	-0.201129	-1.04081	0.953462	0.0873463	0.953462
chr1	2390001	2400000	-0.885849	-0.975102	-1.05549	-1.01606	-1.11957	-0.804844	-0.951	-0.729701	-0.970177	-1.09363	-0.804237	-0.919941	-0.868788	-1.3624	-0.842256	-0.793371	-0.898755	-0.951745	-0.800927	-0.749552	-0.905418	-0.744357	-0.872657	-0.872547	0.924897	-0.0146485	FALSE	0.332177	0.107355	FALSE	0.217564	0.0927068	FALSE	FALSE	static	-0.938767	-0.916584	-0.855342	-0.8147	-0.30131	1.11601	1.11601
chr1	3430001	3440000	-0.896018	-0.949335	-0.795889	-1.28813	-0.829145	-0.904088	-0.740403	-0.947811	-0.793019	-0.688989	-0.597657	-0.716399	-0.64138	-0.988838	-0.829871	-0.685664	-0.603511	-0.737316	-0.672972	-0.661857	-1.05892	-1.16457	-1.00335	-0.762093	0.132774	0.176126	FALSE	0.502737	-0.0903455	FALSE	0.529967	0.0857804	FALSE	FALSE	static	-0.931628	-0.705408	-0.902092	-0.693264	1.14634	-0.45308	1.14634
chr1	3630001	3640000	-0.398137	-0.239164	-0.0932245	-0.279561	-0.0863982	-0.294663	-0.333652	-0.253433	-0.319648	-0.323983	-0.264998	-0.26198	-0.276155	-0.375235	-0.294347	-0.336244	-0.135425	-0.32759	-0.269515	-0.196075	-0.187253	-0.385667	-0.213364	-0.0759244	0.370815	-0.0592945	FALSE	0.158775	0.082722	FALSE	0.771392	0.0234275	FALSE	FALSE	static	-0.256829	-0.294313	-0.210047	-0.073406	-0.961274	1.03468	1.03468
chr1	3890001	3900000	-0.633977	-0.586823	-0.725311	-0.803429	-0.717242	-0.891975	-0.627103	-0.755651	-0.739142	-0.78714	-0.652085	-0.671308	-0.684047	-0.679868	-0.634302	-0.991351	-0.418716	-0.409009	-0.477369	-0.520799	-0.755799	-0.440844	-0.421474	-0.551003	0.908106	-0.0122165	FALSE	0.0126121	0.230529	FALSE	0.00975079	0.218312	TRUE	TRUE	up.late	-0.71719	-0.70275	-0.496446	-0.634829	-0.517896	1.15273	1.15273
chr1	3900001	3910000	-0.678976	-0.695856	-0.879833	-0.985507	-0.875514	-0.923275	-0.711202	-0.799655	-0.924731	-0.914827	-0.830628	-0.836991	-0.842702	-0.77244	-0.763168	-1.06683	-0.586776	-0.547038	-0.63238	-0.660202	-0.919642	-0.59744	-0.600977	-0.664491	0.564964	-0.0503125	FALSE	0.0115423	0.217921	FALSE	0.0426487	0.167609	FALSE	FALSE	static	-0.819279	-0.848244	-0.644082	-0.441259	-0.703474	1.14473	1.14473
chr1	5480001	5490000	-0.157172	-0.219156	-0.305622	-0.309442	-0.186141	-0.24402	-0.212626	-0.152915	-0.335984	-0.226155	-0.327641	-0.418704	-0.146052	-0.05488	-0.157367	-0.221644	-0.196691	-0.190402	-0.241645	-0.186955	-0.225928	-0.330906	-0.129199	-0.131751	0.88758	-0.0126667	FALSE	0.681175	0.0318688	FALSE	0.680551	0.0192021	FALSE	FALSE	static	-0.213521	-0.219402	-0.218957	1.15203	-0.643985	-0.508045	1.15203
chr1	5490001	5500000	-0.215592	-0.305874	-0.326527	-0.398117	-0.190949	-0.216559	-0.205805	-0.0938397	-0.360774	-0.245864	-0.379775	-0.342646	-0.13674	-0.0186255	-0.0893692	-0.118984	-0.200122	-0.192975	-0.234306	-0.195951	-0.230949	-0.384114	-0.0797153	-0.10941	0.754243	0.0325607	FALSE	0.937755	0.00815445	FALSE	0.543059	0.0407151	FALSE	FALSE	static	-0.239158	-0.217301	-0.218325	-1.15371	0.618354	0.535352	0.618354
chr1	5510001	5520000	-0.224414	-0.346557	-0.323477	-0.356067	-0.126378	-0.115623	-0.09436	-0.00126441	-0.346578	-0.361368	-0.364956	-0.279992	-0.175082	-0.0253724	0.056279	0.0141624	-0.180584	-0.182633	-0.199937	-0.22108	-0.226718	-0.420991	0.0228869	-0.207145	0.930672	0.0131541	FALSE	0.900296	-0.0166617	FALSE	0.974067	-0.00350763	FALSE	FALSE	static	-0.198546	-0.217569	-0.22214	1.13528	-0.385007	-0.750273	1.13528
chr1	5730001	5740000	-0.235523	0.00340756	-0.223407	-0.154474	0.134262	0.121119	0.0126052	0.00298941	-0.162189	-0.187223	-0.342991	-0.340012	-0.227932	-0.394174	-0.215466	-0.539686	-0.396099	-0.212783	-0.220122	-0.138139	-0.0778348	-0.0831512	-0.15432	-0.094939	0.0284687	-0.258831	FALSE	0.134822	0.129036	FALSE	0.145258	-0.129796	FALSE	FALSE	static	-0.0608796	-0.248252	-0.18123	1.08038	-0.893154	-0.187227	1.08038
chr1	5740001	5750000	-0.389171	-0.0781499	-0.299558	-0.293432	0.0421927	0.109536	-0.0366664	-0.0219712	-0.146366	-0.200313	-0.346387	-0.298936	-0.23336	-0.395306	-0.197648	-0.593727	-0.399318	-0.267019	-0.211813	-0.112383	-0.0585093	-0.0286895	-0.166818	-0.0520113	0.164035	-0.180603	FALSE	0.161138	0.139435	FALSE	0.729756	-0.0411676	FALSE	FALSE	static	-0.137616	-0.234345	-0.173195	0.901435	-1.07567	0.174231	0.901435
chr1	5970001	5980000	-0.398764	-0.273277	-0.229988	-0.256104	-0.520921	-0.271759	-0.266769	-0.291118	-0.267065	-0.349152	-0.307666	-0.23907	-0.330935	-0.290367	-0.225563	-0.436809	-0.26985	-0.279577	-0.105893	-0.244699	-0.360685	-0.246128	-0.25682	-0.349994	0.922424	0.00775886	FALSE	0.454233	0.0416225	FALSE	0.431464	0.0493813	FALSE	FALSE	static	-0.461049	-0.284137	-0.267302	-1.15114	0.497146	0.653998	0.653998
chr1	5980001	5990000	-0.422885	-0.318193	-0.245992	-0.301646	-0.50944	-0.315423	-0.295073	-0.256086	-0.328772	-0.417641	-0.357219	-0.269733	-0.356004	-0.337926	-0.328587	-0.529631	-0.339375	-0.303574	-0.180724	-0.247837	-0.422039	-0.327637	-0.369849	-0.392476	0.643409	-0.0325966	FALSE	0.475231	0.0427502	FALSE	0.879381	0.0101536	FALSE	FALSE	static	-0.439961	-0.342187	-0.323955	-1.14231	0.425028	0.717278	0.717278
chr1	5990001	6000000	-0.398857	-0.333302	-0.209792	-0.36192	-0.435916	-0.327065	-0.268862	-0.233889	-0.371242	-0.415675	-0.369978	-0.288132	-0.340777	-0.379239	-0.422323	-0.567856	-0.352682	-0.292705	-0.226235	-0.260967	-0.431514	-0.368656	-0.457883	-0.422997	0.243699	-0.0732026	FALSE	0.507574	0.042698	FALSE	0.611094	-0.0305046	FALSE	FALSE	static	-0.394255	-0.367228	-0.350373	-1.06774	0.153152	0.914589	0.914589
chr1	6240001	6250000	-0.365563	-0.444477	-0.31122	-0.387437	-0.259059	-0.235453	-0.152743	-0.25797	-0.289181	-0.301633	-0.402152	-0.115235	-0.328062	-0.121422	-0.22467	-0.409038	-0.302198	-0.33559	-0.129151	-0.253118	-0.246616	-0.266465	-0.179562	-0.321854	0.759549	0.0278164	FALSE	0.805002	0.0196047	FALSE	0.423007	0.0474211	FALSE	FALSE	static	-0.310721	-0.255436	-0.245163	-1.14238	0.425514	0.716869	0.716869
chr1	6250001	6260000	-0.271131	-0.391183	-0.252396	-0.312875	-0.216728	-0.147031	-0.0767056	-0.176752	-0.172053	-0.236006	-0.276349	-0.0739057	-0.212293	-0.0540992	-0.150066	-0.285345	-0.243779	-0.277938	-0.0909293	-0.188386	-0.152513	-0.19048	-0.165416	-0.249239	0.521608	0.0480855	FALSE	0.847829	-0.0123202	FALSE	0.546581	0.0357653	FALSE	FALSE	static	-0.238901	-0.166277	-0.183381	-1.12503	0.787761	0.337265	0.787761
chr1	6350001	6360000	-0.0501694	0.0467158	0.139891	0.00361042	0.134671	0.226346	0.266693	0.147762	0.123491	0.105206	0.181656	0.0241793	-0.0498372	0.0210536	0.241569	0.176856	0.122514	0.18191	0.110636	-0.164915	0.296644	0.154889	0.102201	0.263558	0.908975	-0.0114183	FALSE	0.761922	0.030408	FALSE	0.846072	0.0189896	FALSE	FALSE	static	0.107465	0.118335	0.157643	-0.770868	-0.359093	1.12996	1.12996
chr1	6430001	6440000	-0.044069	-0.213441	-0.225562	-0.0757543	-0.124451	0.105399	0.00840203	-0.214991	-0.0476676	-0.0548024	-0.210625	-0.148376	-0.180213	-0.0322204	0.00611871	-0.203598	-0.249507	-0.380211	-0.243246	-0.295384	-0.0949075	-0.0381218	-0.00570633	-0.159064	0.913929	-0.0108646	FALSE	0.372046	-0.0743454	FALSE	0.332313	-0.08521	FALSE	FALSE	static	-0.108032	-0.0913184	-0.174115	0.375872	0.757601	-1.13347	0.757601
chr1	6440001	6450000	-0.0161375	-0.192805	-0.27668	-0.13259	-0.0984804	0.0432356	-0.0538074	-0.24071	-0.0903621	-0.041051	-0.208086	-0.156005	-0.283441	-0.109219	-0.0654973	-0.253955	-0.311859	-0.398541	-0.283389	-0.200081	-0.15482	-0.117534	-0.0317652	-0.255885	0.732026	-0.0299553	FALSE	0.383099	-0.0682822	FALSE	0.216501	-0.0982375	FALSE	FALSE	static	-0.132421	-0.123107	-0.223525	0.491376	0.65925	-1.15063	0.65925
chr1	6630001	6640000	-0.206739	-0.160788	-0.124785	-0.0819044	-0.168741	-0.0351429	-0.265619	-0.178513	-0.175137	-0.0535717	-0.208828	-0.194668	-0.32967	-0.159558	-0.15261	-0.277265	-0.184419	-0.196811	-0.120094	-0.235975	-0.115229	-0.216531	-0.151189	-0.172786	0.511831	-0.0411343	FALSE	0.715994	0.0197841	FALSE	0.626329	-0.0213501	FALSE	FALSE	static	-0.15665	-0.233216	-0.220246	1.14015	-0.728323	-0.411828	1.14015
chr1	6640001	6650000	-0.330593	-0.279532	-0.260015	-0.193088	-0.212019	-0.135713	-0.336625	-0.241663	-0.218993	-0.17629	-0.260931	-0.241096	-0.406994	-0.189803	-0.198068	-0.257878	-0.281841	-0.238146	-0.216473	-0.306692	-0.193997	-0.259269	-0.317628	-0.294869	0.942081	0.00489946	FALSE	0.684681	-0.0198578	FALSE	0.732612	-0.0149583	FALSE	FALSE	static	-0.256929	-0.312528	-0.302184	1.1369	-0.743361	-0.393539	1.1369
chr1	7650001	7660000	-0.478673	-0.391928	-0.448969	-0.471639	-0.351683	-0.48293	-0.340354	-0.26194	-0.358449	-0.410342	-0.503391	-0.427893	-0.2333	-0.255632	-0.390332	-0.183222	-0.407082	-0.539919	-0.631577	-0.360852	-0.408173	-0.477386	-0.649545	-0.387507	0.451597	0.0581945	FALSE	0.0935636	-0.137435	FALSE	0.248152	-0.0792406	FALSE	FALSE	static	-0.367405	-0.343743	-0.470328	0.39257	0.744149	-1.13672	0.744149
chr1	7660001	7670000	-0.315392	-0.224696	-0.315463	-0.351422	-0.274263	-0.308696	-0.24292	-0.200224	-0.288466	-0.338769	-0.411042	-0.320019	-0.155695	-0.192588	-0.272647	-0.129033	-0.342198	-0.469797	-0.528611	-0.201444	-0.301706	-0.358797	-0.575489	-0.319408	0.826166	0.0156022	FALSE	0.137188	-0.123649	FALSE	0.125768	-0.108047	FALSE	FALSE	static	-0.255822	-0.261067	-0.376896	0.615243	0.538609	-1.15385	0.615243
chr1	7950001	7960000	-1.21233	-1.01415	-1.08318	-1.10054	-0.827224	-0.910817	-1.10791	-0.961291	-0.753687	-0.641005	-0.645472	-0.671522	-0.860888	-0.677673	-0.823068	-0.673541	-0.939281	-0.721978	-0.877081	-0.685852	-0.549631	-0.556946	-0.732597	-0.60402	0.00474844	0.308823	TRUE	0.923597	0.00993368	FALSE	0.00376534	0.318757	TRUE	TRUE	up.early	-1.02929	-0.691876	-0.822517	-1.0662	0.917044	0.149156	0.917044
chr1	7960001	7970000	-1.14153	-0.910616	-1.0276	-1.09459	-0.867558	-0.866969	-1.01164	-0.938167	-0.702796	-0.747911	-0.691312	-0.754347	-0.931744	-0.643454	-0.87331	-0.736637	-0.949085	-0.784423	-0.927289	-0.762125	-0.582196	-0.643613	-0.821312	-0.64164	0.013316	0.222145	FALSE	0.972777	-0.00377155	FALSE	0.0169025	0.218374	FALSE	FALSE	static	-0.983394	-0.733343	-0.854065	-1.01127	0.988332	0.0229405	0.988332
chr1	8350001	8360000	-0.613129	-0.594452	-0.53864	-0.376334	-0.461597	-0.392966	-0.451477	-0.358952	-0.41872	-0.24086	-0.235562	-0.400117	-0.49014	-0.301388	-0.603156	-0.365902	-0.258558	-0.569349	-0.370331	-0.484929	-0.503235	-0.470157	-0.854021	-0.418346	0.301087	0.091463	FALSE	0.333879	-0.109135	FALSE	0.87583	-0.0176724	FALSE	FALSE	static	-0.477077	-0.379025	-0.457247	-0.75794	1.13339	-0.375447	1.13339
chr1	8360001	8370000	-0.49703	-0.562844	-0.442021	-0.266703	-0.423949	-0.348669	-0.43637	-0.3061	-0.353309	-0.217501	-0.18987	-0.303524	-0.41801	-0.256183	-0.567385	-0.280531	-0.26317	-0.486709	-0.384013	-0.481592	-0.469591	-0.394489	-0.751419	-0.424714	0.317219	0.0871718	FALSE	0.164017	-0.133673	FALSE	0.597694	-0.0465015	FALSE	FALSE	static	-0.416175	-0.321345	-0.426552	-0.485542	1.15007	-0.664525	1.15007
chr1	8550001	8560000	-0.126577	-0.0817376	0.00172063	-0.00346452	-0.232804	-0.343347	-0.110674	-0.0641163	0.0265205	-0.0766929	-0.0362493	-0.172859	-0.0406988	-0.129452	0.0956513	0.0956332	-0.0235981	-0.159666	0.0350876	0.0972817	0.00398738	0.0679067	0.0628678	-0.000274713	0.284372	0.0903566	FALSE	0.566479	0.0402173	FALSE	0.0693863	0.130574	FALSE	FALSE	static	-0.0900337	-0.0176889	0.035928	-1.04571	0.0987566	0.946958	0.946958
chr1	8740001	8750000	0.277883	0.174775	0.246908	0.298173	0.105308	0.278418	0.058771	0.0995144	0.146872	0.173904	0.255384	-0.058003	0.0563586	-0.083942	-0.123915	0.153924	0.0827834	-0.257477	0.189775	0.0533293	0.121675	0.155537	0.162034	0.100898	0.178276	-0.127396	FALSE	0.928947	0.0109964	FALSE	0.170471	-0.116399	FALSE	FALSE	static	0.215759	0.00218137	0.13105	0.924515	-1.06139	0.136871	0.924515
chr1	8850001	8860000	-0.188819	-0.139828	-0.517889	-0.324952	-0.27677	-0.341246	-0.372392	-0.295362	-0.263935	-0.284776	-0.299777	-0.442598	-0.3775	-0.0935796	-0.486237	-0.202572	-0.094715	-0.249635	-0.363657	-0.28983	-0.320298	-0.150431	-0.159897	-0.267473	0.994194	0.000785337	FALSE	0.411598	0.0693797	FALSE	0.340675	0.070165	FALSE	FALSE	static	-0.314035	-0.270004	-0.223922	-0.992328	-0.0151719	1.0075	1.0075
chr1	8860001	8870000	-0.17056	-0.119285	-0.522231	-0.327488	-0.256832	-0.329679	-0.322708	-0.283832	-0.255035	-0.306887	-0.28785	-0.399081	-0.353366	-0.115717	-0.483374	-0.244019	-0.112151	-0.259756	-0.325498	-0.256349	-0.257765	-0.131301	-0.149353	-0.191327	0.899076	-0.0140892	FALSE	0.172862	0.0952286	FALSE	0.253921	0.0811394	FALSE	FALSE	static	-0.298617	-0.269492	-0.194782	-0.827501	-0.283696	1.1112	1.1112
chr1	9020001	9030000	0.298564	0.342904	0.336	0.474456	-0.0582813	0.372727	0.31085	0.340259	0.297878	0.335005	0.379902	0.393808	0.27343	0.241626	0.284433	0.189277	0.0286335	0.117337	-0.0192709	-0.0550522	0.229635	0.269465	0.285515	0.39751	0.980039	-0.0027649	FALSE	0.138645	-0.142698	FALSE	0.188473	-0.145463	FALSE	FALSE	static	0.304095	0.342729	0.20374	0.286776	0.825281	-1.11206	0.825281
chr1	9110001	9120000	-0.341922	-0.188651	-0.344288	-0.164096	-0.106354	-0.241966	-0.226132	-0.118944	-0.169584	-0.093211	-0.106852	-0.266364	-0.13723	-0.185404	-0.122145	0.00650985	-0.271455	-0.0732609	-0.370536	-0.32166	-0.0546617	-0.0608706	-0.305394	-0.152897	0.21747	0.0822592	FALSE	0.413066	-0.0670569	FALSE	0.864687	0.0152023	FALSE	FALSE	static	-0.204828	-0.126789	-0.174024	-0.923023	1.06236	-0.139339	1.06236
chr1	9240001	9250000	-0.222813	-0.311565	-0.404464	-0.220894	-0.174552	-0.257841	-0.143814	-0.271125	-0.334613	-0.424624	-0.274369	-0.178808	-0.10761	-0.368256	-0.361293	-0.272269	-0.291414	-0.143087	-0.372944	-0.246634	-0.19373	-0.219684	-0.101098	-0.292284	0.616746	-0.0393469	FALSE	0.432003	0.0576211	FALSE	0.779633	0.0182742	FALSE	FALSE	static	-0.256181	-0.407682	-0.218865	0.380625	-1.13442	0.753797	0.753797
chr1	9250001	9260000	-0.424161	-0.389402	-0.56622	-0.37923	-0.252931	-0.3076	-0.271723	-0.348918	-0.501005	-0.553346	-0.380645	-0.276394	-0.200017	-0.471811	-0.435898	-0.281215	-0.353529	-0.331059	-0.445039	-0.323339	-0.254037	-0.28687	-0.222075	-0.345041	0.844353	-0.0200185	FALSE	0.375454	0.0674178	FALSE	0.436494	0.0473993	FALSE	FALSE	static	-0.375432	-0.458475	-0.303208	0.0464108	-1.0224	0.975987	0.975987
chr1	9490001	9500000	-0.0539542	-0.0892933	-0.0559126	0.00802342	-0.0293081	-0.0756903	0.155482	-0.0446363	-0.184067	-0.00629123	-0.116745	-0.151187	0.20242	0.203411	-0.0472692	0.101787	0.0887929	0.0921935	-0.10272	0.137446	-0.0352638	0.173527	-0.0705824	0.099832	0.832967	0.0234186	FALSE	0.648509	0.0476457	FALSE	0.265465	0.0710642	FALSE	FALSE	static	-0.0122222	-0.00643306	0.0697084	-0.639499	-0.512886	1.15238	1.15238
chr1	9580001	9590000	-0.392693	-0.394148	-0.212578	-0.253082	-0.352938	-0.39078	-0.207784	-0.486956	-0.256819	-0.260673	-0.333582	-0.523639	-0.294253	-0.537779	-0.309892	-0.35248	-0.240307	-0.35095	-0.304384	-0.173685	-0.373863	-0.394861	-0.22843	-0.10232	0.815862	-0.0222699	FALSE	0.265412	0.0875397	FALSE	0.362374	0.0652698	FALSE	FALSE	static	-0.323573	-0.352828	-0.246392	-0.29053	-0.822565	1.11309	1.11309
chr1	9590001	9600000	-0.450631	-0.514817	-0.382761	-0.353695	-0.447094	-0.503894	-0.344338	-0.529514	-0.363921	-0.32115	-0.394925	-0.574609	-0.360576	-0.599034	-0.403343	-0.432963	-0.456508	-0.477357	-0.441249	-0.288724	-0.501679	-0.416499	-0.387226	-0.201866	0.911393	0.00952797	FALSE	0.668717	0.0349265	FALSE	0.485745	0.0444545	FALSE	FALSE	static	-0.430038	-0.41668	-0.368584	-0.771534	-0.358243	1.12978	1.12978
chr1	9600001	9610000	-0.438057	-0.495037	-0.456864	-0.420453	-0.497623	-0.514002	-0.405692	-0.444117	-0.416901	-0.331384	-0.403955	-0.529143	-0.361328	-0.510656	-0.427398	-0.408465	-0.586919	-0.552626	-0.540642	-0.315071	-0.577924	-0.370621	-0.430797	-0.226163	0.423869	0.0353267	FALSE	0.768774	-0.0264415	FALSE	0.914007	0.0088852	FALSE	FALSE	static	-0.45299	-0.405874	-0.415678	-1.13203	0.763185	0.368848	0.763185
chr1	9870001	9880000	-0.158737	0.0235105	0.0693095	0.150636	0.235316	0.137566	0.0902584	0.0672763	0.0205927	0.101643	0.07691	-0.00326756	0.183512	0.082879	0.0373331	0.188778	0.0593769	0.0049722	0.338794	-0.178268	0.246177	0.181407	0.308405	0.239156	0.920536	0.00915559	FALSE	0.547935	0.063955	FALSE	0.493442	0.0731106	FALSE	FALSE	static	0.0867999	0.101982	0.18038	-0.721862	-0.419573	1.14143	1.14143
chr1	9950001	9960000	-0.13685	-0.165104	-0.141423	-0.248339	-0.0208632	-0.219619	-0.215509	0.0201237	-0.154597	-0.198785	-0.0975949	-0.166508	0.0822296	-0.0271587	-0.0479415	-0.115498	-0.261199	-0.365202	-0.20772	-0.323228	-0.225455	-0.0765928	-0.208435	-0.0608717	0.503743	0.0502163	FALSE	0.0868806	-0.125356	FALSE	0.288056	-0.0751402	FALSE	FALSE	static	-0.113811	-0.069111	-0.203328	0.21858	0.87263	-1.09121	0.87263
chr1	10360001	10370000	0.15702	0.0190483	0.161655	-0.270791	0.197782	0.0210337	-0.0159941	0.0170945	0.0839193	-0.142441	0.128603	0.0320184	0.0965402	0.160109	0.0624488	0.103427	0.0242533	0.0392558	0.112709	0.0404424	-0.127421	0.0819179	-0.121219	0.0234734	0.787819	0.0297221	FALSE	0.405451	-0.0564017	FALSE	0.777581	-0.0266795	FALSE	FALSE	static	0.0532754	0.0255092	0.0473894	0.766702	-1.1311	0.364396	0.766702
chr1	10370001	10380000	0.252446	0.0906668	0.275965	-0.0782694	0.287305	0.127507	0.105865	0.169083	0.225062	0.00831842	0.174362	0.150942	0.265824	0.287246	0.237936	0.177467	0.0614791	0.134191	0.179239	0.123454	0.031912	0.166065	-0.0555466	0.0927012	0.681308	0.0370739	FALSE	0.103296	-0.0992079	FALSE	0.391353	-0.062134	FALSE	FALSE	static	0.15964	0.171326	0.123903	0.324489	0.797458	-1.12195	0.797458
chr1	10440001	10450000	0.251098	0.164959	0.200582	0.198316	0.0784172	0.0583854	0.0795677	0.0809493	0.0544471	0.156414	0.0924079	0.267153	0.136926	0.0836055	0.231797	0.0217964	0.0822966	0.069194	0.0976388	0.156286	0.29836	0.216595	0.229511	0.134119	0.912021	-0.00846607	FALSE	0.65183	0.0299319	FALSE	0.711697	0.0214658	FALSE	FALSE	static	0.144753	0.170089	0.185209	-1.07283	0.166582	0.906249	0.906249
chr1	10500001	10510000	-0.496857	-0.629153	-0.471596	-0.433572	-0.472585	-0.614321	-0.478091	-0.703087	-0.511681	-0.625364	-0.52633	-0.463613	-0.493619	-0.372366	-0.434954	-0.619211	-0.497223	-0.56494	-0.581597	-0.55644	-0.353815	-0.51192	-0.466247	-0.437468	0.686401	0.0315154	FALSE	0.891665	0.00968575	FALSE	0.510751	0.0412011	FALSE	FALSE	static	-0.520887	-0.459528	-0.462232	-1.15382	0.615905	0.537917	0.615905
chr1	10870001	10880000	0.248887	0.213692	0.183469	0.176955	0.151281	0.313103	0.0205577	0.259975	0.121543	0.0103455	0.281339	0.042039	0.0799886	0.307801	0.330113	0.26413	0.256521	0.123334	0.0654394	-0.0089239	0.263153	0.368578	0.252169	0.21975	0.873122	-0.0163276	FALSE	0.90805	0.0128401	FALSE	0.969427	-0.0034875	FALSE	FALSE	static	0.174352	0.179152	0.205294	-0.71545	-0.427194	1.14264	1.14264
chr1	11010001	11020000	-0.478214	-0.466102	-0.512271	-0.457788	-0.500846	-0.524358	-0.193659	-0.494456	-0.263253	-0.387895	-0.307573	-0.231665	-0.347733	-0.450855	-0.634188	-0.449634	-0.273876	-0.462632	-0.303351	-0.288206	-0.430447	-0.0414714	-0.306096	-0.177196	0.46442	0.0693623	FALSE	0.308108	0.0986903	FALSE	0.0528045	0.168053	FALSE	FALSE	static	-0.471549	-0.337151	-0.245191	-1.05633	0.124266	0.93206	0.93206
chr1	11020001	11030000	-0.411862	-0.43979	-0.450167	-0.366024	-0.43584	-0.50159	-0.158714	-0.486255	-0.189553	-0.352685	-0.286166	-0.211516	-0.36791	-0.472699	-0.539235	-0.401905	-0.296396	-0.53444	-0.285695	-0.321299	-0.442572	-0.135925	-0.310021	-0.22941	0.568433	0.0535714	FALSE	0.738676	0.033239	FALSE	0.282078	0.0868104	FALSE	FALSE	static	-0.438319	-0.30462	-0.285914	-1.14737	0.461154	0.686212	0.686212
chr1	11030001	11040000	-0.283966	-0.35672	-0.262277	-0.23616	-0.305898	-0.335113	-0.0871659	-0.379864	-0.111382	-0.234578	-0.216176	-0.152686	-0.252298	-0.386904	-0.402974	-0.294692	-0.249995	-0.526492	-0.248033	-0.293197	-0.374964	-0.190434	-0.245434	-0.262955	0.775965	0.0244344	FALSE	0.605475	-0.0424767	FALSE	0.815293	-0.0180424	FALSE	FALSE	static	-0.311669	-0.214483	-0.266838	-0.973225	1.02478	-0.0515552	1.02478
chr1	11650001	11660000	-0.451424	-0.519334	-0.664315	-0.379414	-0.483373	-0.455612	-0.476071	-0.454113	-0.426782	-0.379456	-0.50632	-0.441688	-0.285378	-0.457714	-0.179182	-0.555133	-0.339802	-0.446332	-0.34788	-0.345339	-0.413627	-0.489021	-0.135394	-0.290775	0.319161	0.0815005	FALSE	0.557547	0.0529351	FALSE	0.0524296	0.134436	FALSE	FALSE	static	-0.488865	-0.37293	-0.339602	-1.12828	0.351454	0.776827	0.776827
chr1	11910001	11920000	-0.17881	-0.505969	-0.0883833	-0.199153	-0.137578	-0.195467	-0.244778	-0.197723	-0.197433	-0.266854	-0.285648	-0.286216	-0.213785	-0.140339	-0.459637	-0.34665	-0.194376	-0.214188	-0.17207	-0.277267	-0.0608635	0.0340425	0.00592833	0.0260508	0.538717	-0.0560878	FALSE	0.0454301	0.167977	FALSE	0.192952	0.11189	FALSE	FALSE	static	-0.267854	-0.297189	-0.0907893	-0.440992	-0.703703	1.1447	1.1447
chr1	12030001	12040000	0.0157147	-0.230726	-0.131091	-0.0645113	0.034676	-0.137326	-0.0359227	-0.264373	0.068134	0.0181024	0.0864977	0.0791577	-0.120001	-0.160685	-0.01447	-0.616134	-0.0701141	0.0659822	-0.101516	-0.0934695	-0.155029	-0.199452	-0.0265678	0.104731	0.913642	0.0192702	FALSE	0.88489	0.0229953	FALSE	0.584685	0.0422655	FALSE	FALSE	static	-0.108572	0.0106346	-0.0533749	-0.974472	1.02371	-0.0492369	1.02371
chr1	12240001	12250000	-0.274104	-0.182287	-0.342128	-0.425649	-0.0818267	-0.142737	-0.351152	-0.288439	-0.671218	-0.356433	-0.34608	-0.330525	-0.474656	-0.471844	-0.676157	-0.310138	-0.279316	-0.239062	-0.181369	-0.103673	-0.232864	-0.116898	-0.177498	-0.106165	0.0749117	-0.193591	FALSE	0.0087836	0.275026	TRUE	0.225683	0.0814344	FALSE	TRUE	down.early	-0.233908	-0.378215	-0.193894	0.358567	-1.12985	0.771281	0.771281
chr1	12620001	12630000	-0.712371	-0.615914	-0.534343	-0.785326	-1.02902	-0.394505	-0.57939	-0.61259	-0.882228	-0.639653	-0.659748	-0.690456	-0.464881	-0.722959	-0.55938	-0.56901	-0.591309	-0.571907	-0.642119	-0.544277	-0.260539	-0.466223	-0.415648	-0.43168	0.951725	0.00939344	FALSE	0.083771	0.158076	FALSE	0.137586	0.16747	FALSE	FALSE	static	-0.623681	-0.604367	-0.453586	-0.677928	-0.470548	1.14848	1.14848
chr1	13380001	13390000	0.0702841	-0.0745387	0.010201	-0.339477	0.170193	-0.0824432	0.442658	0.240142	0.0986527	-0.122138	0.00821778	-0.281473	0.790433	-0.18529	0.36268	-0.238432	0.196759	0.0826002	0.258963	-0.189565	-0.218133	0.621541	0.0745417	0.506554	0.998483	-0.00054591	FALSE	0.673117	0.112576	FALSE	0.564824	0.11203	FALSE	FALSE	static	0.190393	-0.171149	0.0704631	0.87151	-1.09177	0.220257	0.87151
chr1	13660001	13670000	-0.123527	-0.0578306	0.0112152	-0.079354	-0.00598145	-0.0788816	-0.257677	-0.156397	-0.241166	-0.189229	-0.435672	-0.2486	-0.141311	-0.1552	-0.117074	0.113443	-0.25311	-0.487996	-0.353476	-0.226581	-0.377909	-0.244966	-0.206143	-0.370032	0.403212	-0.0832967	FALSE	0.150438	-0.138176	FALSE	0.00361738	-0.221472	TRUE	TRUE	down.late	-0.0709986	-0.17707	-0.262099	1.03462	-0.0732606	-0.961355	1.03462
chr1	13960001	13970000	-0.907169	-0.710532	-0.603469	-0.99453	-0.302769	-0.490461	-0.498728	-0.381813	-0.69399	-1.17976	-0.828502	-0.740271	-0.782115	-1.06604	-0.636307	-0.893808	-0.475375	-0.681995	-0.355562	-0.439685	-0.637845	-0.328508	-0.546454	-0.642735	0.161487	-0.241415	FALSE	0.0111922	0.339079	FALSE	0.493827	0.0976642	FALSE	FALSE	static	-0.625542	-0.731414	-0.50374	-0.0466079	-0.975881	1.02249	1.02249
chr1	13970001	13980000	-0.894447	-0.700067	-0.571841	-0.982095	-0.276769	-0.578401	-0.50338	-0.337694	-0.664629	-1.07069	-0.827878	-0.842648	-0.769393	-1.06249	-0.653709	-0.862341	-0.444469	-0.592412	-0.307764	-0.406948	-0.627556	-0.282974	-0.482782	-0.552119	0.150968	-0.238635	FALSE	0.00254142	0.382094	TRUE	0.30395	0.143459	FALSE	TRUE	down.early	-0.619408	-0.737696	-0.453137	-0.111885	-0.939352	1.05124	1.05124
chr1	14550001	14560000	-0.327757	-0.317904	-0.367375	-0.228684	-0.133895	-0.24383	-0.371288	-0.263165	-0.181102	-0.190308	-0.047681	-0.230677	-0.0310469	-0.231407	-0.139535	-0.0369089	-0.128577	-0.105615	-0.142611	-0.146148	-0.26507	-0.307595	-0.333757	-0.193705	0.0384172	0.145654	FALSE	0.296069	-0.0668015	FALSE	0.177398	0.0788525	FALSE	FALSE	static	-0.294412	-0.125947	-0.194372	-1.05637	0.931988	0.124386	0.931988
chr1	14750001	14760000	-0.0617076	-0.0299845	-0.119913	-0.0978748	-0.00667818	0.0102976	-0.205354	-0.0150132	-0.097492	-0.52943	-0.218926	-0.128725	-0.247739	-0.0470385	-0.3301	-0.0444669	-0.107989	-0.0424139	-0.0105016	-0.0393647	-0.151172	0.0014383	-0.0765787	-0.175262	0.180525	-0.139711	FALSE	0.174588	0.130259	FALSE	0.861192	-0.00945192	FALSE	FALSE	static	-0.0560172	-0.390113	-0.0751586	0.627613	-1.1532	0.525585	0.627613
chr1	15040001	15050000	-0.843646	-0.27624	-0.44725	-0.585409	-0.26804	-0.337626	-0.382649	-0.392663	-0.443636	-0.46823	-0.501746	-0.35179	-0.421042	-0.32943	-0.336812	-0.398697	-0.324323	-0.497258	-0.302879	-0.547594	-0.445559	-0.340666	-0.370798	-0.64839	0.783221	0.0352674	FALSE	0.723579	-0.0282602	FALSE	0.958231	0.00700711	FALSE	FALSE	static	-0.432854	-0.371569	-0.419531	-0.771563	1.12977	-0.358206	1.12977
chr1	15050001	15060000	-0.812597	-0.274028	-0.383971	-0.542622	-0.278841	-0.302042	-0.376865	-0.333476	-0.417313	-0.391003	-0.376641	-0.311348	-0.407197	-0.258447	-0.276943	-0.380158	-0.284442	-0.399321	-0.246381	-0.423739	-0.339807	-0.264776	-0.302284	-0.503756	0.59817	0.0606741	FALSE	0.919794	0.00681801	FALSE	0.518548	0.0674921	FALSE	FALSE	static	-0.411031	-0.314454	-0.331122	-1.13955	0.731216	0.408338	0.731216
chr1	15060001	15070000	-0.581161	-0.293384	-0.284506	-0.428214	-0.282096	-0.236719	-0.353491	-0.217554	-0.364017	-0.325825	-0.26051	-0.264799	-0.370108	-0.180876	-0.229534	-0.312762	-0.263001	-0.290196	-0.189042	-0.298476	-0.236823	-0.213315	-0.218217	-0.487028	0.562825	0.0460867	FALSE	0.83965	0.0140417	FALSE	0.43127	0.0601285	FALSE	FALSE	static	-0.340024	-0.250846	-0.253006	-1.15444	0.598445	0.555995	0.598445
chr1	15310001	15320000	-0.388263	-0.309477	-0.35409	-0.349629	-0.239394	-0.242971	-0.447776	-0.527481	-0.43003	-0.309214	-0.484093	-0.304371	-0.249229	-0.306631	-0.438042	-0.371686	-0.480297	-0.476816	-0.375121	-0.428095	-0.28028	-0.245707	-0.228487	-0.222697	0.960133	-0.00427694	FALSE	0.812496	0.0194745	FALSE	0.852797	0.0151976	FALSE	FALSE	static	-0.34747	-0.333713	-0.334457	-1.15337	0.624749	0.528617	0.624749
chr1	15320001	15330000	-0.233077	-0.228862	-0.225732	-0.189883	-0.128003	-0.140716	-0.243546	-0.483494	-0.243366	-0.156878	-0.308952	-0.189621	-0.133458	-0.121979	-0.381549	-0.235195	-0.344096	-0.385583	-0.216239	-0.229857	-0.146634	-0.146363	-0.112637	-0.12915	0.89316	0.0127896	FALSE	0.92885	0.00755463	FALSE	0.804641	0.0203442	FALSE	FALSE	static	-0.226738	-0.187291	-0.204335	-1.04209	0.951779	0.0903143	0.951779
chr1	15510001	15520000	-0.826818	-0.808722	-0.758606	-0.777878	-0.589513	-0.512502	-0.800166	-0.904413	-0.496042	-0.499264	-0.728015	-0.703784	-0.718781	-0.55819	-0.464494	-0.928593	-0.316698	-0.330685	-0.494755	-0.329539	-0.511693	-0.362165	-0.47303	-0.444277	0.334506	0.110182	FALSE	0.0273673	0.22929	FALSE	0.0011424	0.339472	TRUE	TRUE	up.late	-0.747817	-0.640106	-0.402888	-0.854989	-0.244626	1.09961	1.09961
chr1	15520001	15530000	-0.859962	-0.874446	-0.850949	-0.88409	-0.661314	-0.589085	-0.793196	-0.919641	-0.586855	-0.564487	-0.749025	-0.783546	-0.756769	-0.641846	-0.502406	-1.03128	-0.313078	-0.324264	-0.410404	-0.372915	-0.476189	-0.346139	-0.510828	-0.484993	0.370508	0.102058	FALSE	0.0106274	0.297176	FALSE	0.000217158	0.399234	TRUE	TRUE	up.late	-0.809513	-0.721657	-0.402862	-0.770348	-0.359758	1.13011	1.13011
chr1	16010001	16020000	0.213375	0.0906429	0.227532	0.173552	0.13095	0.0544655	0.272148	0.0441595	0.217914	0.244867	0.215402	0.248984	0.161956	0.22079	0.102838	0.267651	-0.270893	0.0447736	0.129363	0.104338	0.0728872	0.0888534	0.150911	0.0452522	0.28797	0.0591972	FALSE	0.0469729	-0.164364	FALSE	0.180575	-0.105167	FALSE	FALSE	static	0.13928	0.227428	0.032849	0.0625497	0.967257	-1.02981	0.967257
chr1	17060001	17070000	-0.616483	-0.452505	-0.719508	-0.509313	-0.422443	-0.444618	-0.216634	-0.257939	-0.37958	-0.366685	-0.398364	-0.44389	-0.324672	-0.321841	-0.465011	-0.429918	-0.197103	-0.179178	-0.184767	-0.107496	0.0203546	-0.180903	-0.113977	-0.0293004	0.535473	0.0636853	FALSE	0.000302575	0.269699	TRUE	0.00488966	0.333384	TRUE	TRUE	up.late	-0.436518	-0.367061	-0.0650583	-0.744204	-0.392503	1.13671	1.13671
chr1	17410001	17420000	-0.356072	-0.534457	-0.378171	-0.300612	-0.219785	-0.362053	-0.374024	-0.425385	-0.415707	-0.330622	-0.396578	-0.407755	-0.178405	-0.457747	-0.357142	-0.506195	-0.195969	-0.363153	-0.268587	-0.435199	-0.257663	-0.130497	-0.336911	-0.25518	0.889203	-0.0124487	FALSE	0.156733	0.100874	FALSE	0.174011	0.0884252	FALSE	FALSE	static	-0.371114	-0.369608	-0.256042	-0.588715	-0.56591	1.15463	1.15463
chr1	17420001	17430000	-0.207823	-0.452883	-0.29093	-0.271802	-0.167001	-0.268451	-0.203816	-0.349485	-0.381075	-0.289452	-0.262582	-0.304502	-0.177513	-0.350659	-0.33735	-0.436319	-0.173248	-0.329506	-0.185141	-0.386425	-0.216278	-0.0698097	-0.264328	-0.143264	0.556365	-0.0409079	FALSE	0.151926	0.0964316	FALSE	0.420309	0.0555237	FALSE	FALSE	static	-0.278687	-0.3064	-0.190433	-0.333236	-0.790834	1.12407	1.12407
chr1	17610001	17620000	-0.436168	-0.386405	-0.625221	-0.433489	-0.647447	-0.352945	-0.463364	-0.386231	-0.343189	-0.276767	-0.517646	-0.469017	-0.364441	-0.462303	-0.281492	-0.385516	-0.304006	-0.519712	-0.298136	-0.864702	-0.212733	-0.109469	-0.0823419	-0.160972	0.315431	0.0788622	FALSE	0.664643	0.0685374	FALSE	0.304334	0.1474	FALSE	FALSE	static	-0.501908	-0.37288	-0.3208	-1.10875	0.275091	0.833662	0.833662
chr1	17620001	17630000	-0.650201	-0.588284	-0.831472	-0.742793	-0.765138	-0.484661	-0.680508	-0.594422	-0.504469	-0.44516	-0.751467	-0.625265	-0.558513	-0.641678	-0.470668	-0.60704	-0.39686	-0.636793	-0.425109	-0.82805	-0.326572	-0.169042	-0.210895	-0.327808	0.270945	0.0916526	FALSE	0.213398	0.160391	FALSE	0.0529622	0.252044	FALSE	FALSE	static	-0.6852	-0.559072	-0.418498	-0.981467	-0.0360893	1.01756	1.01756
chr1	17630001	17640000	-0.758563	-0.766405	-0.914802	-0.997451	-0.862014	-0.566395	-0.804435	-0.632104	-0.630395	-0.547316	-0.82799	-0.747876	-0.687258	-0.720854	-0.575176	-0.672805	-0.449697	-0.750743	-0.529959	-0.697551	-0.375579	-0.206895	-0.281139	-0.433596	0.237822	0.111562	FALSE	0.0692812	0.210564	FALSE	0.0127839	0.322126	FALSE	FALSE	static	-0.821823	-0.662113	-0.487994	-0.985308	-0.0287641	1.01407	1.01407
chr1	18580001	18590000	-0.343068	-0.29146	-0.519999	-0.584207	-0.261876	-0.423516	-0.365414	-0.274497	-0.399264	-0.392324	-0.387523	-0.340298	-0.298678	-0.419792	-0.311902	-0.193735	-0.804109	-0.861681	-0.569329	-0.576694	-0.582771	-0.740039	-0.595656	-0.665365	0.628499	0.0400651	FALSE	0.000753391	-0.331516	TRUE	0.00268538	-0.291451	TRUE	TRUE	down.late	-0.388012	-0.341329	-0.66633	0.439402	0.705066	-1.14447	0.705066
chr1	18590001	18600000	-0.264549	-0.240025	-0.451494	-0.479225	-0.271038	-0.396803	-0.341346	-0.22316	-0.327495	-0.255375	-0.317355	-0.258886	-0.16037	-0.403003	-0.224389	-0.118	-0.666491	-0.764469	-0.593061	-0.532676	-0.505891	-0.629778	-0.533941	-0.574337	0.313915	0.0753461	FALSE	0.000218974	-0.341972	TRUE	0.00122628	-0.266625	TRUE	TRUE	down.late	-0.331846	-0.252676	-0.59177	0.339646	0.785938	-1.12558	0.785938
chr1	18870001	18880000	-1.21765	-0.96991	-1.10174	-1.02053	-0.664039	-0.620561	-0.723866	-0.867058	-0.80518	-0.936061	-0.909506	-0.972639	-0.821701	-0.829516	-0.752321	-0.959615	-0.830765	-0.914708	-0.73356	-0.923473	-0.720925	-0.706992	-0.708873	-0.689049	0.869511	0.024851	FALSE	0.149287	0.0947745	FALSE	0.31838	0.119625	FALSE	FALSE	static	-0.885546	-0.858055	-0.757918	-0.769766	-0.360499	1.13027	1.13027
chr1	18880001	18890000	-1.28354	-1.07161	-1.19747	-1.0678	-0.682454	-0.685104	-0.777229	-0.927027	-0.980155	-0.911658	-0.962015	-1.11181	-0.913663	-0.850911	-0.823174	-1.02052	-0.940833	-0.925305	-0.768336	-0.974782	-0.751327	-0.800105	-0.783056	-0.717993	0.930707	0.0147899	FALSE	0.105491	0.114022	FALSE	0.310875	0.128812	FALSE	FALSE	static	-0.941898	-0.930827	-0.809986	-0.651346	-0.500045	1.15139	1.15139
chr1	19070001	19080000	-0.363233	-0.422716	-0.277492	-0.260968	-0.130149	-0.20497	-0.310642	-0.119034	-0.176736	0.00716324	-0.0989652	0.00277173	-0.209164	-0.0957139	-0.0474611	-0.183912	-0.0661499	-0.14323	-0.136179	-0.0600699	0.144836	-0.0142399	0.0664481	-0.0607153	0.0463598	0.160898	FALSE	0.325106	0.0665896	FALSE	0.00557533	0.227488	TRUE	TRUE	up.early	-0.270194	-0.0655956	-0.0412889	-1.14929	0.477985	0.671309	0.671309
chr1	19250001	19260000	-0.369424	-0.410605	-0.289555	-0.495939	-0.2369	-0.129814	-0.396818	-0.232901	-0.0813754	-0.0836754	-0.168034	-0.0682584	-0.0437119	-0.0523948	-0.202275	-0.197816	-0.126627	-0.193043	-0.0920341	-0.110569	-0.139953	0.0293317	-0.0423478	-0.0325567	0.0210071	0.208052	FALSE	0.663597	0.0237178	FALSE	0.00549014	0.23177	TRUE	TRUE	up.early	-0.308975	-0.073995	-0.0632614	-1.15384	0.538272	0.615566	0.615566
chr1	19260001	19270000	-0.325169	-0.383511	-0.15551	-0.41405	-0.194092	-0.12777	-0.340984	-0.0958407	-0.0414496	-0.0492819	-0.112805	0.0118438	0.0814175	0.0376799	-0.112705	-0.137817	-0.0710543	-0.148126	-0.142726	-0.0727366	-0.0841696	0.107766	-0.00956158	-0.00608574	0.0239133	0.214226	FALSE	0.852893	-0.012947	FALSE	0.0149503	0.201279	FALSE	FALSE	static	-0.246694	-0.00995669	-0.0276356	-1.1521	0.643082	0.509022	0.643082
chr1	19350001	19360000	-0.351096	-0.254505	-0.258084	-0.304209	-0.353855	-0.233627	-0.443622	-0.26601	-0.378478	-0.366146	-0.315464	-0.397906	-0.239217	-0.421922	-0.318761	-0.254207	-0.484035	-0.16097	-0.24529	-0.146374	-0.12613	-0.304898	-0.151763	-0.0824944	0.618661	-0.0283865	FALSE	0.115371	0.123768	FALSE	0.199456	0.0953816	FALSE	FALSE	static	-0.328637	-0.311585	-0.19388	-0.689636	-0.457243	1.14688	1.14688
chr1	19490001	19500000	-0.200761	-0.156459	-0.182525	-0.437568	-0.0222139	-0.114737	-0.164523	-0.0163339	-0.0124978	-0.0738083	-0.278802	0.0775441	0.111976	-0.126794	-0.509864	-0.0650885	0.102647	0.0546066	0.100554	-0.0241484	0.305619	0.197111	0.289247	0.262526	0.722627	0.0522231	FALSE	0.0383228	0.270687	FALSE	0.00241318	0.32291	TRUE	TRUE	up.late	-0.188103	-0.0465553	0.199243	-0.899491	-0.1773	1.07679	1.07679
chr1	19650001	19660000	-0.701854	-0.693079	-0.830559	-0.566208	-0.602391	-0.434355	-0.593572	-0.66286	-0.555758	-0.665909	-0.578457	-0.35338	-0.3415	-0.419949	-0.491933	-0.382687	-0.430475	-0.395008	-0.507427	-0.617335	-0.365981	-0.737194	-0.470976	-0.601844	0.0864881	0.161913	FALSE	0.668626	-0.0420834	FALSE	0.157293	0.11983	FALSE	FALSE	static	-0.639172	-0.469738	-0.518928	-1.10778	0.836055	0.271726	0.836055
chr1	19660001	19670000	-0.705316	-0.688452	-0.837988	-0.526758	-0.543419	-0.455522	-0.65259	-0.698514	-0.518089	-0.635605	-0.551282	-0.350007	-0.317854	-0.425025	-0.505371	-0.433155	-0.514222	-0.507428	-0.481605	-0.64851	-0.378898	-0.751126	-0.498549	-0.604272	0.0672832	0.171521	FALSE	0.321601	-0.081028	FALSE	0.275313	0.0904934	FALSE	FALSE	static	-0.642045	-0.457536	-0.569878	-0.920177	1.0642	-0.144028	1.0642
chr1	19670001	19680000	-0.613334	-0.579922	-0.734463	-0.414657	-0.403788	-0.377577	-0.591927	-0.618208	-0.43837	-0.457027	-0.40964	-0.280022	-0.213215	-0.365364	-0.411132	-0.390238	-0.523531	-0.524782	-0.317391	-0.557702	-0.326292	-0.627758	-0.444168	-0.440654	0.0596205	0.171108	FALSE	0.163516	-0.0996585	FALSE	0.394655	0.0714499	FALSE	FALSE	static	-0.546575	-0.355424	-0.517749	-0.711537	1.14335	-0.431814	1.14335
chr1	19890001	19900000	-0.47281	-0.528343	-0.285708	-0.56578	-0.406651	-0.352695	-0.245356	-0.232007	-0.298225	-0.347701	-0.290462	-0.369721	-0.244339	-0.171276	-0.236142	-0.407838	-0.458724	-0.456926	-0.649699	-0.674714	-0.242714	-0.192285	-0.234895	-0.358297	0.281183	0.0904558	FALSE	0.295448	-0.112818	FALSE	0.858656	-0.0223627	FALSE	FALSE	static	-0.365327	-0.279323	-0.328169	-0.951778	1.04209	-0.0903164	1.04209
chr1	19900001	19910000	-0.431307	-0.577669	-0.27701	-0.476173	-0.405611	-0.31027	-0.274911	-0.244541	-0.276523	-0.306463	-0.229461	-0.379208	-0.28489	-0.174766	-0.261304	-0.285386	-0.444715	-0.570963	-0.627703	-0.570291	-0.258659	-0.191069	-0.203773	-0.358017	0.18359	0.0999365	FALSE	0.201619	-0.128399	FALSE	0.806431	-0.0284621	FALSE	FALSE	static	-0.346827	-0.255686	-0.327714	-0.764661	1.13164	-0.366982	1.13164
chr1	19910001	19920000	-0.337438	-0.46358	-0.256045	-0.362303	-0.333007	-0.23367	-0.258757	-0.261285	-0.185869	-0.219394	-0.156783	-0.294779	-0.233583	-0.168741	-0.287002	-0.152849	-0.410478	-0.529626	-0.516364	-0.406746	-0.215322	-0.167836	-0.148873	-0.268258	0.0691526	0.100886	FALSE	0.171742	-0.120563	FALSE	0.836898	-0.019677	FALSE	FALSE	static	-0.293777	-0.184712	-0.268813	-0.781844	1.12682	-0.344971	1.12682
chr1	19920001	19930000	-0.231359	-0.345969	-0.230344	-0.210298	-0.266526	-0.148764	-0.269089	-0.207671	-0.0936703	-0.129904	-0.0660606	-0.159991	-0.127915	-0.0696291	-0.375758	-0.0625302	-0.327229	-0.526177	-0.395449	-0.262095	-0.149395	-0.158258	-0.101812	-0.133537	0.13043	0.10307	FALSE	0.201992	-0.121062	FALSE	0.841503	-0.0179915	FALSE	FALSE	static	-0.222641	-0.0944782	-0.201623	-0.72345	1.14113	-0.417675	1.14113
chr1	20090001	20100000	0.361372	0.40784	0.189754	0.21724	0.226512	0.327442	0.297504	0.322079	0.203706	0.292383	0.367464	0.210693	0.239531	0.414122	0.121371	0.300215	-0.134379	-0.313416	-0.0161681	0.00771908	0.141812	0.083356	0.194741	0.130693	0.737085	-0.0250322	FALSE	0.0214891	-0.256891	FALSE	0.0111887	-0.281923	FALSE	FALSE	static	0.256691	0.229702	0.0670324	0.703859	0.44081	-1.14467	0.703859
chr1	20170001	20180000	0.0230216	-0.199902	-0.0966039	-0.16251	-0.164878	-0.038381	-0.12789	-0.0525004	-0.166539	-0.177047	-0.097326	-0.104263	-0.0804115	-0.167081	-0.407469	-0.301435	-0.0690291	-0.325048	-0.193002	-0.0106975	0.109726	-0.00512273	0.0214383	0.0489275	0.259202	-0.0852408	FALSE	0.152175	0.134846	FALSE	0.547066	0.0496048	FALSE	FALSE	static	-0.0965961	-0.17184	-0.0126454	-0.0364435	-0.98128	1.01772	1.01772
chr1	20180001	20190000	0.0244695	-0.262444	-0.123087	-0.161459	-0.222842	-0.0622454	-0.146489	-0.107226	-0.214666	-0.239309	-0.184486	-0.166713	-0.208124	-0.219607	-0.371425	-0.319062	0.038317	-0.24894	-0.142318	0.053037	0.116945	0.023143	0.0305172	0.0338108	0.097108	-0.107759	FALSE	0.00778136	0.228488	TRUE	0.106424	0.120729	FALSE	TRUE	down.early	-0.127047	-0.209357	0.0183023	-0.182287	-0.896317	1.0786	1.0786
chr1	20500001	20510000	-0.87582	-0.859084	-0.986343	-0.603891	-0.703186	-0.742923	-0.785934	-0.735739	-0.698947	-0.703679	-0.666835	-0.749276	-1.0185	-0.815922	-0.651557	-0.674948	-0.727926	-0.681596	-0.85149	-0.747458	-0.56689	-0.585831	-0.484612	-0.564909	0.701238	0.0391574	FALSE	0.281075	0.0961185	FALSE	0.105564	0.135276	FALSE	FALSE	static	-0.788028	-0.70244	-0.607456	-0.982212	-0.0346737	1.01689	1.01689
chr1	20510001	20520000	-0.758341	-0.702313	-0.907294	-0.511684	-0.511236	-0.615772	-0.6847	-0.612804	-0.552057	-0.580254	-0.536987	-0.542249	-0.894197	-0.716779	-0.612119	-0.526918	-0.683654	-0.654979	-0.735605	-0.762433	-0.471311	-0.459321	-0.451504	-0.436682	0.697072	0.0428231	FALSE	0.72432	0.0382589	FALSE	0.39802	0.081082	FALSE	FALSE	static	-0.663279	-0.5627	-0.530649	-1.12331	0.330077	0.793234	0.793234
chr1	20670001	20680000	-0.605327	-0.569283	-0.59988	-0.671995	-0.51389	-0.33798	-0.733553	-0.310615	-0.433946	-0.363893	-0.357247	-0.375493	-0.30567	-0.355489	-0.269473	-0.591115	-0.251985	-0.637531	-0.0575884	-0.199981	-0.260708	-0.223421	-0.327915	-0.1156	0.115364	0.161275	FALSE	0.247696	0.122199	FALSE	0.0200728	0.283474	FALSE	FALSE	static	-0.536455	-0.365197	-0.248252	-1.05658	0.124896	0.931685	0.931685
chr1	20780001	20790000	-0.0910528	-0.129739	0.0226903	0.0058303	-0.360915	-0.264732	-0.0355627	-0.234789	0.0643476	-0.00224848	0.3079	-0.0289316	0.114695	0.0801635	0.170791	0.0943932	0.235518	-0.112927	0.0403182	0.167244	0.120885	0.0912945	0.220875	0.170773	0.0282776	0.236173	FALSE	0.860198	0.0166088	FALSE	0.0103587	0.252781	FALSE	FALSE	static	-0.110497	0.122459	0.16314	-1.14369	0.434082	0.709608	0.709608
chr1	21190001	21200000	-1.0585	-1.05163	-1.18823	-0.947298	-1.00496	-0.542116	-0.692957	-0.637761	-0.773771	-0.70492	-0.780709	-0.718349	-0.597532	-0.806121	-0.911284	-0.764436	-0.997131	-1.04646	-0.914695	-0.647965	-0.864995	-0.879322	-0.695994	-0.985689	0.351204	0.13329	FALSE	0.167649	-0.121891	FALSE	0.943857	0.0113991	FALSE	FALSE	static	-0.883025	-0.735065	-0.845107	-0.806197	1.11901	-0.312817	1.11901
chr1	21200001	21210000	-1.11454	-1.14157	-1.31954	-1.03609	-1.03996	-0.593363	-0.744308	-0.748197	-0.897175	-0.768682	-0.901267	-0.790946	-0.682974	-0.947726	-0.994272	-0.914117	-1.13611	-1.09199	-1.00744	-0.715984	-0.941486	-0.961202	-0.933197	-1.08316	0.496179	0.105052	FALSE	0.163452	-0.121676	FALSE	0.917641	-0.0166243	FALSE	FALSE	static	-0.960118	-0.836504	-0.955569	-0.609496	1.15409	-0.544597	1.15409
chr1	21210001	21220000	-1.01096	-1.04464	-1.23739	-0.968101	-0.955269	-0.579163	-0.689289	-0.808238	-0.844177	-0.726563	-0.882428	-0.71484	-0.689294	-0.977389	-0.944229	-0.951178	-1.1203	-1.0689	-0.928368	-0.732362	-0.905627	-0.923579	-0.984205	-1.02629	0.622262	0.0703697	FALSE	0.163989	-0.119942	FALSE	0.699976	-0.049572	FALSE	FALSE	static	-0.906332	-0.807584	-0.933259	-0.361806	1.13055	-0.76874	1.13055
chr1	21380001	21390000	-0.710263	-0.45901	-0.513163	-0.394201	-0.265197	-0.145191	-0.462974	-0.368773	-0.434597	-0.173849	-0.411779	-0.57281	-0.396619	-0.312436	-0.392725	-0.927464	-0.644075	-0.833905	-0.865783	-0.666746	-0.461195	-0.43496	-0.269422	-0.552275	0.831763	-0.0379383	FALSE	0.385591	-0.13826	FALSE	0.175247	-0.176199	FALSE	FALSE	static	-0.414168	-0.570123	-0.509986	1.06699	-0.915785	-0.151208	1.06699
chr1	21660001	21670000	-0.589563	-0.512812	-0.487586	-0.396578	-0.368914	-0.349673	-0.508032	-0.432378	-0.424819	-0.339138	-0.298218	-0.261485	-0.357376	-0.252923	-0.281293	-0.40219	-0.374144	-0.380145	-0.565485	-0.434049	-0.70505	-0.431516	-0.343447	-0.630407	0.0409815	0.128512	FALSE	0.0589285	-0.15585	FALSE	0.747628	-0.0273384	FALSE	FALSE	static	-0.444668	-0.316159	-0.554683	-0.0516376	1.02482	-0.973181	1.02482
chr1	21670001	21680000	-0.652017	-0.556703	-0.541693	-0.428073	-0.306639	-0.310815	-0.523515	-0.41823	-0.479579	-0.351171	-0.326719	-0.246394	-0.305248	-0.315796	-0.301772	-0.377796	-0.441547	-0.434891	-0.575275	-0.453876	-0.807455	-0.483231	-0.368551	-0.596667	0.113164	0.129151	FALSE	0.0380182	-0.182127	FALSE	0.575831	-0.0529762	FALSE	FALSE	static	-0.450728	-0.325822	-0.612146	0.0847817	0.95491	-1.03969	0.95491
chr1	21970001	21980000	-0.00840672	0.000802056	-0.365644	-0.0356121	-0.278238	-0.431239	-0.426194	0.00240679	-0.147738	-0.0914614	-0.0872415	-0.223379	-0.32447	-0.395555	-0.319943	-0.244806	-0.497275	-0.486987	-0.430897	-0.809889	-0.286614	-0.223083	-0.553825	-0.193536	0.804804	-0.0365587	FALSE	0.0981126	-0.205939	FALSE	0.0863752	-0.242497	FALSE	FALSE	static	-0.187161	-0.185923	-0.354436	0.570954	0.583723	-1.15468	0.583723
chr1	22010001	22020000	-0.0789224	-0.359852	-0.44125	-0.392633	-0.397558	-0.763285	-0.267834	-0.113096	-0.060906	-0.444469	-0.295002	-0.353758	-0.0815121	-0.363684	-0.267763	-0.252832	-0.439636	-0.496072	-0.122842	-0.583289	-0.0914912	-0.0747589	-0.3153	0.131216	0.552537	0.0868134	FALSE	0.927188	0.0159689	FALSE	0.536369	0.102782	FALSE	FALSE	static	-0.338102	-0.245638	-0.166901	-1.02563	0.0534	0.97223	0.97223
chr1	22020001	22030000	-0.149062	-0.337882	-0.447969	-0.402301	-0.39299	-0.795257	-0.278168	-0.144724	-0.127241	-0.473347	-0.342922	-0.230317	-0.158859	-0.258718	-0.159221	-0.374115	-0.434261	-0.464687	-0.0313376	-0.490463	-0.0584854	0.0122658	-0.186058	0.149782	0.449764	0.102952	FALSE	0.615708	0.0776871	FALSE	0.254275	0.180639	FALSE	FALSE	static	-0.35388	-0.246606	-0.114432	-0.963602	-0.0692016	1.0328	1.0328
chr1	22080001	22090000	-0.437022	-0.515967	-0.531844	-0.381798	-0.429134	-0.376502	-0.339161	-0.498521	-0.00840661	-0.0432441	-0.199138	-0.0166663	-0.299374	-0.183785	-0.204878	-0.271745	-0.0647542	-0.250637	-0.233644	-0.276213	-0.097448	-0.194959	-0.0694134	0.10826	0.0047977	0.285339	TRUE	0.860277	0.0185535	FALSE	0.00200949	0.303892	TRUE	TRUE	up.early	-0.416117	-0.110822	-0.0437294	-1.13809	0.400033	0.738056	0.738056
chr1	22090001	22100000	-0.685521	-0.756438	-0.729884	-0.670069	-0.537799	-0.4982	-0.515415	-0.697221	-0.193044	-0.23618	-0.292802	-0.168873	-0.414093	-0.35135	-0.301365	-0.305421	-0.119919	-0.428836	-0.3899	-0.453141	-0.222718	-0.257037	-0.154589	-0.00846552	0.00107457	0.353428	TRUE	0.789093	0.0285653	FALSE	0.00182947	0.381993	TRUE	TRUE	up.early	-0.62125	-0.246377	-0.161747	-1.13728	0.395611	0.741672	0.741672
chr1	22420001	22430000	-0.633688	-0.333833	-0.551281	-0.309875	-0.71594	-0.26778	-0.573462	-0.515631	-0.304333	-0.27799	-0.295444	-0.39525	-0.334623	-0.355257	-0.372737	-0.221748	-0.618241	-0.509683	-0.618459	-0.473759	-0.532638	-0.526716	-0.361755	-0.431531	0.111397	0.168014	FALSE	0.00409889	-0.189425	TRUE	0.837143	-0.0214118	FALSE	TRUE	down.late	-0.448018	-0.304874	-0.473021	-0.434047	1.14369	-0.709639	1.14369
chr1	22430001	22440000	-0.519874	-0.23517	-0.437125	-0.205767	-0.555738	-0.254456	-0.439554	-0.426295	-0.167353	-0.249952	-0.194215	-0.33007	-0.241855	-0.314054	-0.269283	-0.176049	-0.59266	-0.462694	-0.542931	-0.402987	-0.480314	-0.434695	-0.313192	-0.370292	0.107259	0.141393	FALSE	0.00305214	-0.207117	TRUE	0.420605	-0.0657231	FALSE	TRUE	down.late	-0.347656	-0.225076	-0.41098	-0.208987	1.08798	-0.878992	1.08798
chr1	22650001	22660000	-0.522135	-0.612362	-0.601968	-0.581704	-0.646218	-0.410599	-0.566377	-0.48177	-0.655154	-0.416102	-0.471897	-0.715338	-0.372158	-0.557706	-0.493365	-0.315198	-0.667888	-0.646097	-0.799391	-0.418624	-0.40325	-0.491623	-0.313248	-0.505845	0.561264	0.0532768	FALSE	0.804901	-0.0311309	FALSE	0.824477	0.0221459	FALSE	FALSE	static	-0.562609	-0.467276	-0.563144	-0.572497	1.15469	-0.58219	1.15469
chr1	22660001	22670000	-0.542061	-0.685738	-0.619002	-0.535276	-0.594933	-0.477644	-0.610447	-0.475297	-0.697254	-0.489435	-0.490627	-0.779861	-0.415296	-0.618623	-0.423329	-0.33973	-0.692137	-0.672071	-0.857458	-0.521747	-0.378224	-0.519173	-0.381333	-0.494611	0.731182	0.0357803	FALSE	0.805429	-0.0328249	FALSE	0.978903	0.00295542	FALSE	FALSE	static	-0.575761	-0.497284	-0.627771	-0.1343	1.06036	-0.926064	1.06036
chr1	22720001	22730000	0.145928	0.0519656	0.188351	0.0921245	0.189346	0.0228274	0.0719994	-0.0109431	0.183394	0.214973	0.151968	0.0892141	0.0625341	0.214887	0.253869	0.183785	-0.0229496	-0.170659	-0.0695376	-0.354681	0.197511	0.224761	0.145441	0.143573	0.171443	0.0753782	FALSE	0.177306	-0.157646	FALSE	0.460956	-0.0822674	FALSE	FALSE	static	0.0904409	0.184772	-0.0326102	0.0878219	0.953193	-1.04101	0.953193
chr1	22960001	22970000	-0.908872	-0.798067	-0.508919	-0.938792	-0.791962	-0.693587	-0.622449	-0.529271	-0.851798	-0.783848	-0.920192	-0.50921	-0.581631	-0.64129	-0.589256	-0.7669	-0.606488	-0.81315	-0.791463	-0.568153	-0.614517	-0.626526	-0.795361	-0.577697	0.901318	0.0184743	FALSE	0.768573	0.0313463	FALSE	0.622799	0.0498206	FALSE	FALSE	static	-0.723633	-0.686951	-0.642608	-0.967046	-0.0629344	1.02998	1.02998
chr1	22970001	22980000	-0.700996	-0.685436	-0.386189	-0.761371	-0.659941	-0.522306	-0.476391	-0.440655	-0.649011	-0.603275	-0.803004	-0.396652	-0.422836	-0.534973	-0.421526	-0.585551	-0.488949	-0.611515	-0.615716	-0.423396	-0.498789	-0.457248	-0.582782	-0.432628	0.829472	0.027057	FALSE	0.674067	0.0382257	FALSE	0.420602	0.0652827	FALSE	FALSE	static	-0.579455	-0.529468	-0.481858	-1.00802	0.0162399	0.991781	0.991781
chr1	23280001	23290000	-0.504199	-0.408483	-0.390028	-0.366813	-0.693687	-0.650381	-0.483944	-0.575895	-0.347899	-0.329336	-0.41067	-0.549857	-0.488768	-0.201489	-0.463554	-0.427556	-0.305426	-0.412906	-0.26532	-0.397707	-0.0973218	-0.17453	-0.243065	-0.227234	0.236362	0.106787	FALSE	0.0837781	0.136952	FALSE	0.0071607	0.24374	TRUE	TRUE	up.late	-0.47519	-0.376296	-0.231618	-0.931871	-0.124583	1.05645	1.05645
chr1	23290001	23300000	-0.455384	-0.369971	-0.372015	-0.291566	-0.647596	-0.599643	-0.458974	-0.557839	-0.336406	-0.286994	-0.417153	-0.598063	-0.484649	-0.164621	-0.480036	-0.32352	-0.150069	-0.434411	-0.332755	-0.397442	-0.0665784	-0.160201	-0.232448	-0.186635	0.423111	0.0826932	FALSE	0.14747	0.141363	FALSE	0.0184912	0.224056	FALSE	FALSE	static	-0.430357	-0.362566	-0.195969	-0.835107	-0.27306	1.10817	1.10817
chr1	23540001	23550000	0.0308421	-0.158229	-0.110522	-0.219232	-0.0788752	0.0812523	-0.117193	-0.168343	-0.0373119	-0.00670255	-0.119373	-0.0261945	-0.0881214	-0.0671108	0.0459047	0.0702362	-0.496417	-0.539518	-0.3757	-0.0737225	-0.195661	-0.213313	0.0504833	-0.290011	0.341849	0.0639534	FALSE	0.0541427	-0.238148	FALSE	0.130102	-0.174195	FALSE	FALSE	static	-0.0937473	-0.0911556	-0.220279	0.559705	0.594818	-1.15452	0.594818
chr1	23550001	23560000	0.0591618	-0.0437387	0.00772718	-0.104692	0.0260901	0.132984	-0.0346073	-0.0065069	0.081318	0.0887023	-0.0172283	0.0417029	-0.00717639	-0.0336595	0.181111	0.123828	-0.353236	-0.367005	-0.283604	0.00714698	-0.0437357	-0.125334	0.171902	-0.10759	0.358716	0.0527725	FALSE	0.0832742	-0.195007	FALSE	0.168894	-0.142234	FALSE	FALSE	static	0.00329231	-0.014253	-0.0876196	0.749619	0.385817	-1.13544	0.749619
chr1	23680001	23690000	0.0482938	0.15259	0.0297511	0.076519	-0.0108542	-0.19761	-0.190093	-0.188798	0.198788	0.215173	0.00319601	-0.0561399	0.063423	0.069837	0.0507896	0.03407	-0.0107293	0.0141162	0.0390889	0.0141388	0.157019	0.129576	0.150154	0.216312	0.24611	0.107417	FALSE	0.827594	0.0163174	FALSE	0.127703	0.123734	FALSE	FALSE	static	-0.0249685	0.121554	0.128872	-1.15367	0.534672	0.619001	0.619001
chr1	23750001	23760000	0.066002	-0.145452	-0.00700868	-0.259081	0.0335814	-0.21931	1.86272e-05	-0.0951441	-0.000171175	0.0999114	0.124338	-0.0239723	-0.0402366	-0.0745027	0.116208	0.10796	-0.00457428	-0.1212	0.0900637	-0.0374899	-0.00763952	0.0778769	0.0176887	0.0275978	0.154582	0.116991	FALSE	0.567112	-0.0334016	FALSE	0.226553	0.0835895	FALSE	FALSE	static	-0.108312	0.0729735	0.0276082	-1.12083	0.800856	0.31997	0.800856
chr1	24050001	24060000	0.132104	0.192365	0.207378	0.112764	0.144054	0.202247	-0.156885	0.12552	0.0958064	0.121037	0.216589	0.122711	0.0646012	-0.146877	0.0748954	-0.216751	-0.064463	-0.00268655	-0.129403	-0.0957352	0.185314	-0.0846051	0.24564	0.326642	0.460358	-0.0784418	FALSE	0.968193	0.00608643	FALSE	0.504467	-0.0723553	FALSE	FALSE	static	0.117884	0.0218701	0.0976928	0.765181	-1.13151	0.366324	0.765181
chr1	24060001	24070000	0.205938	0.266163	0.253952	0.166516	0.181673	0.242559	-0.15951	0.151973	0.194574	0.166514	0.218651	0.12713	0.086057	-0.132634	0.108154	-0.0843687	-0.0883011	0.0315467	-0.130269	-0.080726	0.159612	-0.0223272	0.263911	0.260615	0.460358	-0.0781485	FALSE	0.761756	-0.0362519	FALSE	0.26911	-0.1144	FALSE	FALSE	static	0.16161	0.0822714	0.0965353	1.13817	-0.73771	-0.400455	1.13817
chr1	24260001	24270000	0.712239	0.747504	0.660925	0.71817	0.626186	0.630883	0.622725	0.645194	0.522014	0.636601	0.746174	0.708964	0.8959	0.705508	0.816725	0.549783	0.382087	0.44291	0.439281	0.320982	0.575365	0.663528	0.720921	0.651383	0.747928	0.0272302	FALSE	0.0880499	-0.173151	FALSE	0.0798458	-0.145921	FALSE	FALSE	static	0.674708	0.544983	0.579074	1.117	-0.811953	-0.305043	1.117
chr1	24270001	24280000	0.693716	0.719474	0.685744	0.678211	0.545625	0.612771	0.592606	0.661754	0.493427	0.628861	0.698259	0.709594	0.832698	0.647184	0.738661	0.456173	0.392666	0.436675	0.466324	0.299446	0.53825	0.692828	0.73821	0.645163	0.98347	0.00186958	FALSE	0.228297	-0.124412	FALSE	0.151656	-0.122542	FALSE	FALSE	static	0.653703	0.500243	0.581873	0.978051	-1.02059	0.0425399	0.978051
chr1	24390001	24400000	-0.843202	-0.573767	-0.854635	-0.622973	-0.632198	-0.794168	-0.664751	-0.781205	-0.602397	-0.732914	-0.455598	-0.728196	-0.646349	-0.504182	-0.547654	-0.448118	-0.633505	-0.581006	-0.460492	-0.77394	-0.572641	-0.525588	-0.496678	-0.449396	0.119196	0.137686	FALSE	0.815792	0.0215202	FALSE	0.040667	0.159206	FALSE	FALSE	static	-0.718464	-0.570698	-0.525339	-1.1252	0.338022	0.787183	0.787183
chr1	24400001	24410000	-0.972315	-0.683196	-1.0203	-0.809934	-0.771181	-0.902345	-0.839988	-0.817794	-0.688448	-0.844766	-0.543681	-0.788164	-0.726577	-0.562214	-0.613905	-0.476534	-0.837893	-0.673818	-0.627435	-0.852178	-0.654481	-0.558064	-0.5421	-0.474217	0.0475508	0.196596	FALSE	0.98137	0.00301272	FALSE	0.0277021	0.199609	FALSE	FALSE	static	-0.84709	-0.648535	-0.599354	-1.13422	0.379625	0.754599	0.754599
chr1	24640001	24650000	-0.577775	-0.533989	-0.6636	-0.828892	-0.592205	-0.683011	-0.759914	-0.680952	-0.449325	-0.513504	-0.437228	-0.537111	-0.295293	-0.566698	-0.377645	-0.692046	-0.606357	-0.551187	-0.443517	-0.588294	-0.332496	-0.247976	-0.473679	-0.394991	0.0491931	0.181436	FALSE	0.781511	0.0287942	FALSE	0.0149419	0.21023	FALSE	FALSE	static	-0.657651	-0.453371	-0.388409	-1.12342	0.330528	0.792893	0.792893
chr1	24650001	24660000	-0.621412	-0.539187	-0.708237	-0.825578	-0.640589	-0.742819	-0.75728	-0.645644	-0.486817	-0.51009	-0.426868	-0.582827	-0.284077	-0.599673	-0.402792	-0.735432	-0.632457	-0.610844	-0.428988	-0.637352	-0.363366	-0.334203	-0.522211	-0.476094	0.0641261	0.181521	FALSE	0.981901	0.00288262	FALSE	0.0213212	0.184404	FALSE	FALSE	static	-0.67925	-0.471196	-0.438461	-1.1456	0.447472	0.698125	0.698125
chr1	24660001	24670000	-0.538654	-0.394002	-0.57966	-0.669676	-0.509905	-0.671122	-0.666552	-0.423263	-0.405603	-0.366764	-0.30706	-0.496984	-0.143941	-0.475599	-0.340835	-0.55299	-0.522098	-0.531563	-0.367138	-0.530865	-0.306321	-0.316745	-0.422494	-0.432241	0.0789285	0.170382	FALSE	0.63435	-0.0424613	FALSE	0.0763734	0.127921	FALSE	FALSE	static	-0.552044	-0.362706	-0.376267	-1.15232	0.640359	0.51196	0.640359
chr1	24840001	24850000	-0.681528	-0.65116	-0.826427	-0.726452	-0.541643	-0.699865	-0.378253	-0.70926	-0.505936	-0.349643	-0.629366	-0.212941	-0.281494	-0.420977	-0.488401	-0.391697	-0.706549	-0.70221	-0.636462	-0.534527	-0.590231	-0.359203	-0.421412	-0.53153	0.0345554	0.241767	FALSE	0.112381	-0.150208	FALSE	0.316497	0.0915581	FALSE	FALSE	static	-0.641738	-0.376484	-0.510838	-0.995632	1.00431	-0.00867921	1.00431
chr1	24850001	24860000	-0.60648	-0.593068	-0.649303	-0.549975	-0.352835	-0.632367	-0.290907	-0.648293	-0.410316	-0.236586	-0.486774	-0.120011	-0.192267	-0.401439	-0.411309	-0.340988	-0.640621	-0.587008	-0.459568	-0.484868	-0.448041	-0.251312	-0.288772	-0.430423	0.0520271	0.215442	FALSE	0.192218	-0.123865	FALSE	0.336744	0.0915768	FALSE	FALSE	static	-0.53685	-0.2807	-0.401637	-1.01805	0.980914	0.0371371	0.980914
chr1	25110001	25120000	0.429925	0.239289	0.206806	0.0746159	0.00788376	0.188181	0.184935	0.0205679	0.177801	0.0978161	0.183017	0.22452	0.0688272	0.158747	0.220883	0.155689	-0.185907	-0.0281738	-0.0119652	-0.117893	0.108412	0.0912833	0.235922	0.0366708	0.935448	-0.00811293	FALSE	0.0727864	-0.144869	FALSE	0.105389	-0.152982	FALSE	FALSE	static	0.179911	0.162009	0.0752216	0.729785	0.410066	-1.13985	0.729785
chr1	25230001	25240000	-1.17048	-1.35741	-1.19665	-1.09546	-1.45818	-1.04591	-0.785798	-1.47411	-0.534482	-1.23133	-0.878487	-0.908921	-0.412596	-1.25548	-0.665654	-0.8096	-0.967303	-1.00953	0.199388	-0.53639	-0.986379	-0.805339	-1.01712	-0.823946	0.0971516	0.360932	FALSE	0.753227	0.0937408	FALSE	0.0642604	0.454673	FALSE	FALSE	static	-1.4649	-1.1128	-0.003745	-0.792623	-0.330883	1.12351	1.12351
chr1	25240001	25250000	-1.05555	-1.35724	-1.20399	-1.13372	-1.58895	-0.929079	-0.694011	-1.45704	-0.541379	-1.39361	-0.978595	-0.88099	-0.33895	-1.32833	-0.642182	-0.604369	-0.894258	-1.10585	0.822977	-0.610813	-1.07943	-0.732931	-1.24659	-0.853024	0.201439	0.338897	FALSE	0.778645	0.12606	FALSE	0.200734	0.464957	FALSE	FALSE	static	-1.5855	-1.27126	0.521673	-0.710026	-0.433592	1.14362	1.14362
chr1	25410001	25420000	-0.298338	-0.0631821	-0.198152	0.0436887	-0.0429782	-0.391554	-0.168122	0.119115	0.177955	-0.0172225	0.0501735	0.161964	0.185042	0.0597799	-0.453135	-0.208359	-0.169409	-0.305843	-0.451197	-0.269909	0.192359	-0.0565352	0.129996	0.230983	0.452233	0.119465	FALSE	0.667286	-0.0819691	FALSE	0.825229	0.037496	FALSE	FALSE	static	-0.353767	0.0243937	-0.0324666	-1.14342	0.711137	0.432285	0.711137
chr1	25530001	25540000	0.00951767	0.0957656	-0.478015	0.0592569	-0.292226	-0.13417	-0.390048	-0.207469	-0.066391	-0.123922	-0.245796	-0.212708	0.00976574	-0.021032	0.0211667	-0.107785	-0.0289297	-0.245085	-0.180911	-0.098783	0.0221852	-0.0122022	-0.144869	0.121314	0.59379	0.0738358	FALSE	0.807177	0.0224275	FALSE	0.436221	0.0962633	FALSE	FALSE	static	-0.160444	-0.0828806	-0.00815444	-1.00615	0.0124184	0.993733	0.993733
chr1	25810001	25820000	-1.10863	-0.878487	-1.19912	-0.95362	-0.622921	-0.603775	-0.62251	-0.638616	-0.644094	-0.557691	-0.66704	-0.603516	-0.662731	-0.719481	-0.597816	-0.726738	-0.634817	-0.765714	-0.539224	-0.589247	-0.478731	-0.58445	-0.506563	-0.549001	0.215015	0.181072	FALSE	0.236239	0.06642	FALSE	0.0719086	0.247492	FALSE	FALSE	static	-0.845315	-0.617825	-0.546113	-1.12387	0.332406	0.791466	0.791466
chr1	25820001	25830000	-0.866438	-0.704906	-0.953312	-0.694423	-0.491272	-0.465049	-0.429645	-0.428895	-0.492265	-0.391083	-0.50791	-0.451106	-0.526195	-0.550002	-0.560316	-0.594951	-0.470669	-0.69299	-0.453767	-0.457833	-0.313043	-0.450116	-0.423648	-0.401009	0.333156	0.120014	FALSE	0.449959	0.0513439	FALSE	0.145231	0.171358	FALSE	FALSE	static	-0.644421	-0.474628	-0.420715	-1.1235	0.330856	0.792643	0.792643
chr1	26010001	26020000	-0.528858	-0.388114	-0.497222	-0.376676	-0.178058	-0.274823	-0.217922	-0.322938	-0.131482	-0.182232	-0.202978	-0.203265	-0.183682	-0.366666	-0.448853	-0.173585	-0.261721	-0.149141	-0.357476	-0.265543	-0.144047	-0.13586	-0.205057	-0.417991	0.226402	0.111483	FALSE	0.954622	-0.00551153	FALSE	0.185779	0.105972	FALSE	FALSE	static	-0.338606	-0.216309	-0.221906	-1.15375	0.617405	0.536347	0.617405
chr1	26020001	26030000	-0.50217	-0.333179	-0.509723	-0.323804	-0.120519	-0.257161	-0.136637	-0.273331	-0.138338	-0.128368	-0.119863	-0.175114	-0.141384	-0.31708	-0.368027	-0.168168	-0.187398	-0.0762522	-0.253098	-0.27467	-0.08715	-0.0648147	-0.0985868	-0.374509	0.244264	0.112523	FALSE	0.845395	0.0174831	FALSE	0.154025	0.130006	FALSE	FALSE	static	-0.293441	-0.172613	-0.157972	-1.14909	0.476078	0.673011	0.673011
chr1	26250001	26260000	-0.104717	-0.0827703	0.0305799	-0.0540574	-0.1166	-0.153315	-0.18327	-0.052431	0.0682046	0.0399073	-0.0912898	0.00628652	0.0532368	-0.0774534	0.0633275	-0.134725	-0.377064	-0.0594303	-0.473375	-0.334394	-0.0215444	0.145049	0.138028	0.152596	0.165341	0.0805094	FALSE	0.529999	-0.0947037	FALSE	0.928086	-0.0141944	FALSE	FALSE	static	-0.0872542	0.0123549	-0.0122501	-1.12177	0.797993	0.32378	0.797993
chr1	26460001	26470000	-0.203879	-0.0368853	-0.163286	-0.313784	-0.362224	-0.358395	-0.313221	-0.353068	-0.0422911	-0.175338	-0.296487	-0.122472	-0.0887931	-0.218949	-0.085901	-0.267293	-0.333077	-0.374283	-0.382781	0.0226107	-0.141383	-0.0178903	-0.226432	-0.284415	0.223972	0.100902	FALSE	0.589526	-0.0550157	FALSE	0.655692	0.0458864	FALSE	FALSE	static	-0.242121	-0.141581	-0.383461	0.111923	0.93933	-1.05125	0.93933
chr1	26470001	26480000	-0.252192	-0.0404388	-0.117018	-0.318413	-0.310131	-0.388657	-0.360611	-0.467695	-0.0551598	-0.221359	-0.330819	-0.13515	-0.128318	-0.222237	-0.0279119	-0.262836	-0.358073	-0.408507	-0.368437	-0.00467762	-0.133807	-0.0251478	-0.295526	-0.203781	0.264149	0.108921	FALSE	0.625716	-0.0517708	FALSE	0.600881	0.05715	FALSE	FALSE	static	-0.277174	-0.153215	-0.406332	0.0136926	0.993083	-1.00678	0.993083
chr1	26590001	26600000	-0.0948435	-0.206743	-0.250655	-0.00952949	-0.272865	-0.222014	0.00120047	-0.135283	-0.0118487	-0.0135406	0.112037	-0.0336215	-0.0432014	0.100999	-0.125093	0.260493	-0.159768	0.0542588	0.0612101	-0.108678	-0.0100257	0.0129481	0.0211208	0.0424863	0.0557228	0.17962	FALSE	0.608747	-0.041584	FALSE	0.0441065	0.138036	FALSE	FALSE	static	-0.159208	0.0503867	0.0253596	-1.14778	0.683207	0.464574	0.683207
chr1	26890001	26900000	-0.0366289	-0.0333384	-0.0118578	-0.120016	-0.0532908	0.0253926	-0.157468	0.247397	-0.144618	0.130878	0.00171709	0.154638	0.0274419	-0.0772093	0.120845	0.12529	-0.195207	-0.417522	-0.310627	-0.38982	-0.029818	0.114549	-0.0607785	-0.0122387	0.522969	0.0598492	FALSE	0.0887146	-0.205056	FALSE	0.205241	-0.145206	FALSE	FALSE	static	-0.0148018	0.0517993	-0.0751906	-0.0326005	1.0159	-0.983301	1.0159
chr1	26900001	26910000	-0.119885	-0.0178601	0.0253717	-0.10086	-0.0436231	-0.045773	-0.21411	0.195224	-0.140881	0.0941198	0.0265814	0.1504	0.00713217	-0.141162	0.110649	0.0701706	-0.23299	-0.316383	-0.298913	-0.38472	-0.034827	0.178469	-0.0016755	-0.0437473	0.500804	0.0623156	FALSE	0.166045	-0.163975	FALSE	0.376766	-0.101659	FALSE	FALSE	static	-0.0355642	0.0349878	-0.0604173	-0.30778	1.11771	-0.809933	1.11771
chr1	27100001	27110000	0.032043	-0.134816	-0.0919123	-0.116111	-0.122324	-0.0760087	0.0982503	-0.40276	-0.243565	-0.020846	-0.0979806	-0.0507625	-0.11462	-0.063466	-0.119475	0.0307104	-0.258726	-0.378399	-0.191125	-0.414654	-0.0543458	0.0891212	0.128079	0.0307766	0.880406	0.0167042	FALSE	0.724821	-0.0461586	FALSE	0.83664	-0.0294544	FALSE	FALSE	static	-0.0916596	-0.0765428	-0.0617703	-1.00382	0.00768033	0.996138	0.996138
chr1	27110001	27120000	0.0252786	-0.128583	-0.101644	-0.0967851	0.0184727	-0.0932176	0.0106166	-0.274978	-0.150527	0.0104604	-0.123014	-0.0320433	-0.152734	-0.0344521	-0.145917	0.0550108	-0.205069	-0.357625	-0.157194	-0.33845	0.0466646	0.115259	0.156635	0.117805	0.922159	0.00845288	FALSE	0.96815	-0.00609454	FALSE	0.98705	0.00235834	FALSE	FALSE	static	-0.0844992	-0.0600636	-0.00400653	-0.847524	-0.255412	1.10294	1.10294
chr1	27410001	27420000	-0.47641	-0.415842	-0.0955209	-0.474399	-0.28594	-0.253828	-0.457085	-0.333485	-0.42081	-0.0331312	-0.325004	-0.198002	-0.336121	-0.363282	-0.878592	-0.304096	-0.395169	-0.451727	-0.101062	-0.34691	-0.251271	-0.22471	-0.547723	-0.292529	0.96427	-0.00831595	FALSE	0.856783	0.030992	FALSE	0.833687	0.0226761	FALSE	FALSE	static	-0.344397	-0.285665	-0.298699	-1.12863	0.775608	0.353022	0.775608
chr1	27660001	27670000	0.143251	0.20861	0.305673	0.201426	0.244769	-0.166375	0.267816	0.036918	0.228156	0.192028	0.151685	0.206541	0.30225	0.143421	0.227812	0.108546	0.169877	-0.0885841	-0.184953	0.0780982	0.214457	0.10193	0.192954	0.159747	0.692987	0.0397939	FALSE	0.171934	-0.114614	FALSE	0.481521	-0.0748202	FALSE	FALSE	static	0.169838	0.219363	0.141826	-0.182649	1.07873	-0.896086	1.07873
chr1	27670001	27680000	0.122636	0.144917	0.244987	0.192837	0.203237	-0.229362	0.19623	0.0469507	0.230884	0.135141	0.114909	0.179634	0.212728	0.109292	0.192182	0.0933476	0.150736	-0.0635803	-0.181907	0.0147045	0.194003	0.0367603	0.195553	0.138372	0.657419	0.0432108	FALSE	0.207634	-0.0979346	FALSE	0.600881	-0.0547238	FALSE	FALSE	static	0.132674	0.1844	0.126171	-0.472451	1.14869	-0.676239	1.14869
chr1	28000001	28010000	0.155286	-0.000204685	0.117833	0.141189	0.0243614	0.12587	-0.237641	-0.0255597	0.234019	0.255624	0.0712255	0.012948	0.351064	0.0151165	0.254787	-0.0556795	0.108132	-0.119008	-0.0124609	0.0144196	0.0276495	0.166703	0.121106	-0.0474161	0.338564	0.104746	FALSE	0.234145	-0.109997	FALSE	0.955658	-0.00525107	FALSE	FALSE	static	0.0478184	0.176422	0.0691838	-0.725385	1.14074	-0.415358	1.14074
chr1	28010001	28020000	0.171588	0.111661	0.187921	0.175208	0.000895421	0.144121	-0.0893681	-0.0876807	0.250863	0.293412	0.212697	0.0516355	0.360386	0.0812241	0.270665	0.0592394	0.167526	-0.0258545	0.0433278	0.0569023	0.0919605	0.236436	0.193837	0.0439667	0.191613	0.120722	FALSE	0.210232	-0.0965023	FALSE	0.763099	0.0242197	FALSE	FALSE	static	0.0754179	0.232671	0.143057	-0.95033	1.04319	-0.0928611	1.04319
chr1	28220001	28230000	-0.511121	-0.677421	-0.76278	-0.602354	-0.478913	-0.671351	-0.41669	-0.701039	-0.780305	-0.541091	-0.622389	-0.392751	-0.399329	-0.499992	-0.508119	-0.742315	-0.623232	-0.749666	-0.47667	-0.540692	-0.417851	-0.43349	-0.595603	-0.467041	0.714754	0.0419224	FALSE	0.836501	0.0227558	FALSE	0.437966	0.0646782	FALSE	FALSE	static	-0.59833	-0.547332	-0.499311	-1.00987	0.0200384	0.98983	0.98983
chr1	28230001	28240000	-0.626525	-0.677911	-0.807925	-0.681105	-0.440906	-0.675714	-0.480348	-0.745761	-0.861153	-0.569858	-0.692551	-0.434581	-0.449585	-0.453254	-0.560813	-0.860052	-0.659554	-0.665001	-0.450444	-0.558389	-0.414761	-0.425367	-0.545482	-0.475481	0.818103	0.0317937	FALSE	0.432457	0.085921	FALSE	0.1359	0.117715	FALSE	FALSE	static	-0.640385	-0.597374	-0.483904	-0.822565	-0.290529	1.11309	1.11309
chr1	28510001	28520000	-0.333225	-0.276654	-0.355259	-0.30114	-0.679247	-0.554853	-0.820458	-0.648698	-0.20162	-0.264042	-0.311333	-0.189129	-0.372727	-0.299599	-0.157381	-0.142979	-0.355677	-0.586253	-0.36701	-0.235093	0.0204975	0.0330948	-0.0974911	0.0377922	0.0678118	0.253841	FALSE	0.734756	0.0485838	FALSE	0.0527426	0.302424	FALSE	FALSE	static	-0.464565	-0.24628	-0.0943092	-1.05408	0.11877	0.935311	0.935311
chr1	28520001	28530000	-0.206701	-0.0885445	-0.217923	-0.192663	-0.437452	-0.39875	-0.591512	-0.438205	-0.0833374	-0.171482	-0.144216	-0.0616475	-0.247428	-0.0757889	0.00938464	-0.0791755	-0.202456	-0.26542	-0.146276	-0.0643631	0.17029	0.162649	0.0585834	0.154995	0.0630767	0.214757	FALSE	0.387132	0.0902118	FALSE	0.0184142	0.304969	FALSE	FALSE	static	-0.296777	-0.0983029	0.0683573	-1.02774	0.0580122	0.969731	0.969731
chr1	28610001	28620000	-0.209948	-0.21974	-0.323168	-0.121543	-0.0588596	-0.189981	-0.229231	-0.200995	-0.213483	-0.180394	-0.068262	-0.152462	-0.116166	-0.0404826	-0.247245	-0.192793	-0.223662	-0.177754	-0.166679	-0.235663	-0.0983497	-0.402796	-0.0962922	-0.138152	0.474938	0.0427725	FALSE	0.545662	-0.0410078	FALSE	0.982073	0.00176475	FALSE	FALSE	static	-0.174968	-0.12674	-0.154261	-0.949738	1.04364	-0.0939003	1.04364
chr1	28620001	28630000	-0.391243	-0.295642	-0.4447	-0.251538	-0.228359	-0.424469	-0.353166	-0.294224	-0.334656	-0.292342	-0.156649	-0.258078	-0.175564	-0.240937	-0.385724	-0.286301	-0.343917	-0.219143	-0.277785	-0.342639	-0.222797	-0.562662	-0.154689	-0.23214	0.257997	0.0691363	FALSE	0.743018	-0.0281904	FALSE	0.596086	0.0409459	FALSE	FALSE	static	-0.316712	-0.240187	-0.252579	-1.14149	0.721583	0.419906	0.721583
chr1	28770001	28780000	-0.299043	-0.387868	-0.517905	-0.439753	-0.35638	-0.425112	-0.581799	-0.399248	-0.229455	-0.243556	-0.484299	-0.237777	-0.290538	-0.288949	-0.259147	-0.267653	-0.166694	-0.110976	-0.167497	-0.306346	-0.12647	0.0528816	-0.106235	-0.101278	0.0522435	0.138217	FALSE	0.0248591	0.158595	FALSE	0.000719203	0.296812	TRUE	TRUE	up.early	-0.416776	-0.232622	-0.109878	-1.05965	0.13252	0.927133	0.927133
chr1	28880001	28890000	-0.509033	-0.388223	-0.495154	-0.576535	-0.404534	-0.507981	-0.397389	-0.377638	-0.402791	-0.546374	-0.566066	-0.473544	-0.533546	-0.496701	-0.329407	-0.435317	-0.540944	-0.424961	-0.516153	-0.672917	-0.475797	-0.556304	-0.310562	-0.403625	0.819905	-0.0159074	FALSE	0.860198	-0.0146895	FALSE	0.661882	-0.030597	FALSE	FALSE	static	-0.466165	-0.458573	-0.471898	-0.0926841	1.04312	-0.950431	1.04312
chr1	28890001	28900000	-0.499195	-0.349161	-0.444218	-0.543355	-0.430408	-0.396863	-0.324071	-0.360569	-0.371382	-0.53087	-0.487804	-0.358759	-0.452177	-0.447467	-0.239081	-0.429757	-0.479267	-0.294456	-0.457417	-0.583617	-0.388375	-0.450605	-0.27591	-0.296445	0.961674	0.00381786	FALSE	0.896589	0.0114007	FALSE	0.837143	0.0152186	FALSE	FALSE	static	-0.42919	-0.398701	-0.387294	-1.11395	0.293658	0.820293	0.820293
chr1	29210001	29220000	-0.98804	-0.973319	-1.18774	-0.919024	-0.830044	-1.11698	-0.816875	-0.879084	-0.886884	-0.722972	-0.746502	-0.807544	-0.855462	-0.831776	-0.79927	-0.815769	-0.690539	-0.907855	-0.73059	-0.779369	-1.06316	-1.0831	-0.762732	-0.862175	0.0772155	0.155616	FALSE	0.562626	-0.0516677	FALSE	0.290581	0.103948	FALSE	FALSE	static	-0.95101	-0.787511	-0.818742	-1.13586	0.747836	0.388024	0.747836
chr1	29220001	29230000	-1.09592	-1.05747	-1.23163	-1.03843	-0.889088	-1.1407	-0.802686	-0.90023	-0.936765	-0.785071	-0.816007	-0.863149	-0.865348	-0.78737	-0.823924	-0.848911	-0.797703	-1.02275	-0.782268	-0.85655	-1.11082	-1.06512	-0.80641	-0.947525	0.0659673	0.178701	FALSE	0.270738	-0.0828246	FALSE	0.319846	0.0958768	FALSE	FALSE	static	-1.01066	-0.825196	-0.926432	-0.968082	1.02912	-0.0610394	1.02912
chr1	29230001	29240000	-1.02279	-0.88571	-1.05767	-0.90459	-0.796431	-0.935747	-0.641953	-0.742221	-0.791622	-0.687941	-0.748535	-0.746174	-0.722998	-0.606056	-0.705117	-0.670215	-0.754593	-0.873104	-0.678355	-0.784913	-0.877004	-1.00281	-0.674934	-0.906779	0.0790557	0.163556	FALSE	0.116272	-0.109229	FALSE	0.558054	0.0543268	FALSE	FALSE	static	-0.871008	-0.698334	-0.860804	-0.629212	1.1531	-0.523887	1.1531
chr1	29460001	29470000	-0.109282	-0.0759932	-0.287862	-0.0665006	-0.0173685	-0.30234	-0.225333	-0.0695093	0.0762099	-0.0353202	-0.0647727	0.0593572	-0.300907	-0.178108	-0.205212	-0.242214	-0.101456	-0.0711396	-0.0790736	-0.18953	0.0559261	-0.0947921	-0.049503	-0.0659206	0.767907	0.0329027	FALSE	0.679979	0.0369348	FALSE	0.280689	0.0698374	FALSE	FALSE	static	-0.116004	-0.0541598	-0.0733698	-1.10025	0.853577	0.246676	0.853577
chr1	30090001	30100000	-0.402253	-0.389849	-0.412897	-0.336076	-0.322149	-0.247	-0.252711	-0.338264	-0.461421	-0.408005	-0.48621	-0.450414	-0.424719	-0.40965	-0.493013	-0.368195	-0.396348	-0.469537	-0.444866	-0.455841	-0.471868	-0.530783	-0.43694	-0.536435	0.0348753	-0.100053	FALSE	0.367986	-0.0301238	FALSE	0.00482163	-0.130177	TRUE	TRUE	down.late	-0.344823	-0.427333	-0.468845	1.09051	-0.216474	-0.874033	1.09051
chr1	30100001	30110000	-0.452006	-0.429202	-0.470357	-0.335014	-0.341714	-0.256786	-0.324986	-0.389825	-0.511439	-0.439422	-0.523948	-0.467471	-0.499957	-0.45848	-0.576248	-0.426768	-0.426958	-0.528679	-0.468411	-0.47599	-0.442807	-0.536099	-0.448691	-0.596392	0.0375545	-0.11298	FALSE	0.958396	-0.0025368	FALSE	0.0199614	-0.115517	FALSE	FALSE	static	-0.383477	-0.472706	-0.488371	1.14358	-0.433364	-0.71022	1.14358
chr1	30360001	30370000	-0.119351	-0.133272	-0.372542	-0.0677641	-0.0636748	-0.0214697	-0.129232	-0.0371132	-0.0423879	-0.0292715	0.0251813	-0.0794386	-0.355673	-0.408147	-0.129425	-0.205387	-0.193745	-0.252113	-0.202621	-0.126621	0.04103	-0.148772	-0.0229053	0.136915	0.771065	-0.0350163	FALSE	0.623141	0.0569644	FALSE	0.819891	0.0219482	FALSE	FALSE	static	-0.105	-0.0750718	-0.0686611	-1.13882	0.404157	0.734667	0.734667
chr1	30370001	30380000	-0.182298	-0.241325	-0.395767	-0.130676	-0.0965443	-0.0232758	-0.131533	-0.0585338	-0.0917107	-0.0789951	-0.0322155	-0.116325	-0.399079	-0.540961	-0.228418	-0.187767	-0.249755	-0.277296	-0.275697	-0.170944	-0.0317661	-0.157198	-0.0526478	0.110904	0.683836	-0.0519396	FALSE	0.565659	0.0713838	FALSE	0.846213	0.0194442	FALSE	FALSE	static	-0.150754	-0.122271	-0.113928	-1.12743	0.347668	0.779762	0.779762
chr1	30700001	30710000	-1.03571	-1.121	-1.25206	-1.20871	-1.21475	-0.989426	-0.871562	-1.00428	-0.910617	-1.00495	-0.76086	-0.987323	-0.959691	-1.14851	-1.03187	-0.977665	-0.965389	-1.0368	-1.05688	-0.949692	-1.03781	-0.890761	-1.15387	-0.844405	0.232334	0.114503	FALSE	0.827978	-0.0192649	FALSE	0.248136	0.0952378	FALSE	FALSE	static	-1.07258	-0.926169	-1.10059	-0.421312	1.14172	-0.720404	1.14172
chr1	30710001	30720000	-0.99228	-1.04735	-1.24654	-1.2409	-1.14634	-0.924378	-0.802286	-0.920006	-0.885457	-0.95251	-0.758065	-0.894177	-0.874635	-1.05953	-0.918168	-0.90828	-0.849554	-0.961009	-0.941776	-0.887946	-0.875107	-0.784872	-1.02149	-0.707183	0.195976	0.133658	FALSE	0.711315	0.0277353	FALSE	0.0920563	0.161393	FALSE	FALSE	static	-1.02741	-0.866926	-0.948815	-0.993082	1.00678	-0.0136961	1.00678
chr1	30720001	30730000	-0.758415	-0.814133	-1.0915	-1.07267	-0.948408	-0.735171	-0.553029	-0.684471	-0.70829	-0.769421	-0.594365	-0.679105	-0.679968	-0.818306	-0.659301	-0.685001	-0.627282	-0.745642	-0.70973	-0.683414	-0.571643	-0.554156	-0.802907	-0.438615	0.253312	0.133005	FALSE	0.4342	0.0575461	FALSE	0.0924153	0.190551	FALSE	FALSE	static	-0.818694	-0.66829	-0.718596	-1.09061	0.87383	0.21678	0.87383
chr1	30930001	30940000	-0.789454	-0.691827	-1.1384	-0.90975	-0.79841	-0.559643	-0.633937	-0.865725	-0.433742	-0.515663	-0.463734	-0.461748	-0.454128	-0.385788	-0.429765	-0.582132	-0.535482	-0.534954	-0.696125	-0.628101	-0.467213	-0.577929	-0.471356	-0.68641	0.0180075	0.332556	FALSE	0.0587612	-0.108859	FALSE	0.0396222	0.223697	FALSE	FALSE	static	-0.788865	-0.437148	-0.528869	-1.11762	0.810181	0.307444	0.810181
chr1	30940001	30950000	-0.553404	-0.540418	-0.945126	-0.740904	-0.667575	-0.45654	-0.635421	-0.702131	-0.271975	-0.364202	-0.332028	-0.315304	-0.273569	-0.250384	-0.182954	-0.361505	-0.365918	-0.41137	-0.53178	-0.46241	-0.255031	-0.430864	-0.30215	-0.484941	0.00616218	0.3612	TRUE	0.0634285	-0.111568	FALSE	0.0122385	0.249632	FALSE	TRUE	up.early	-0.663967	-0.275048	-0.351404	-1.13471	0.752623	0.382088	0.752623
chr1	31180001	31190000	-0.219306	-0.331109	-0.306788	-0.382784	-0.248632	-0.457106	-0.370311	-0.169269	-0.173262	-0.416622	-0.317586	-0.227503	-0.1744	-0.306743	-0.359629	-0.207178	-0.282899	-0.376923	-0.467227	-0.356133	-0.250386	-0.294114	-0.323397	-0.222081	0.624698	0.0377978	FALSE	0.446919	-0.0487795	FALSE	0.873795	-0.0109818	FALSE	FALSE	static	-0.31532	-0.252746	-0.305519	-0.7168	1.1424	-0.425595	1.1424
chr1	31190001	31200000	-0.148788	-0.0943317	-0.162524	-0.219224	-0.0732953	-0.27919	-0.162619	-0.0225621	-0.00851046	-0.254983	-0.135075	-0.0526986	0.0566525	-0.161222	-0.161823	-0.0937868	-0.163707	-0.258095	-0.29932	-0.238503	-0.162322	-0.153166	-0.113029	-0.0832067	0.552068	0.0438858	FALSE	0.198642	-0.0824877	FALSE	0.489869	-0.0386019	FALSE	FALSE	static	-0.15373	-0.080446	-0.166261	-0.436883	1.1441	-0.707221	1.1441
chr1	31380001	31390000	-0.0123557	-0.0258551	0.140409	0.0914589	-0.0304543	0.0366311	0.0600978	-0.118361	0.0897622	0.06101	-0.00244162	-0.0051051	0.130633	-0.00408101	0.110143	0.151073	-0.0550622	-0.0575769	-0.0279667	0.208285	0.0174639	0.100725	0.0378761	0.123884	0.398964	0.0486779	FALSE	0.727572	-0.0229206	FALSE	0.696166	0.0257572	FALSE	FALSE	static	0.0223114	0.0842029	0.057396	-1.04148	0.952583	0.0888984	0.952583
chr1	31550001	31560000	-0.0315611	-0.101093	-0.0479644	-0.148633	-0.130384	0.0683058	-0.079047	-0.0486562	0.0150238	0.0463659	-0.0303277	0.147973	0.179612	0.0736982	0.0237555	-0.142968	-0.0252411	-0.299601	-0.291429	-0.0635732	-0.0914523	-0.375102	0.0675337	-0.00548245	0.132395	0.104021	FALSE	0.087775	-0.174685	FALSE	0.43421	-0.0706642	FALSE	FALSE	static	-0.0596872	0.0569436	-0.0705775	-0.498607	1.15127	-0.652663	1.15127
chr1	31810001	31820000	-0.19362	-0.0553182	-0.278673	-0.319338	-0.156429	-0.0745199	-0.288202	-0.0826975	-0.119166	-0.0890082	-0.139801	-0.161773	-0.199304	-0.0820482	-0.202603	-0.431769	-0.254312	-0.361631	-0.216501	-0.173895	-0.155168	-0.142763	-0.357864	-0.152424	0.977074	0.00291577	FALSE	0.539682	-0.0486358	FALSE	0.515385	-0.04572	FALSE	FALSE	static	-0.183097	-0.136841	-0.168409	-0.859486	1.09755	-0.238061	1.09755
chr1	32020001	32030000	0.104097	0.0996676	-0.0692538	0.181091	-0.0955887	-0.0497086	0.0776046	-0.0200844	-0.105489	-0.0717972	-0.105738	-0.0611651	-0.0541434	0.0129855	-0.0148456	-0.031643	-0.131264	-0.0427632	-0.0032723	-0.0127975	-0.0294574	-0.122922	0.0260599	0.0887804	0.18849	-0.0824576	FALSE	0.587599	0.025525	FALSE	0.356746	-0.0569326	FALSE	FALSE	static	0.0367439	-0.0484546	-0.0122066	1.04583	-0.946801	-0.0990287	1.04583
chr1	32030001	32040000	0.110763	0.0669248	-0.0586983	0.148934	-0.0532422	-0.072371	0.0798257	-0.0408306	-0.086726	-0.052489	-0.112609	0.00627569	-0.0415055	0.0579269	-0.022882	-0.11492	-0.0365773	-0.00343673	0.0104566	-0.0319762	0.0201003	-0.0927921	0.0398517	0.0612172	0.248002	-0.0685292	FALSE	0.300315	0.0417215	FALSE	0.609267	-0.0268077	FALSE	FALSE	static	0.0281925	-0.0358088	0.0131005	0.78802	-1.12495	0.336926	0.78802
chr1	32060001	32070000	0.0956494	-0.0785948	-0.151985	-0.123315	-0.0649919	-0.0896552	-0.0174198	-0.106391	0.0156764	-0.0819411	-0.133032	0.0512944	-0.0664423	-0.0923817	-0.00210113	-0.15795	-0.0267164	0.0784336	0.0274571	-0.0646024	0.0568359	0.0329426	0.0565269	0.0766101	0.904322	0.00872822	FALSE	0.0654959	0.0880456	FALSE	0.0435664	0.0967738	FALSE	FALSE	static	-0.0695062	-0.03877	0.0585464	-0.79178	-0.331993	1.12377	1.12377
chr1	32190001	32200000	-0.274878	-0.212279	-0.172459	-0.179515	-0.225967	-0.316769	-0.225323	-0.320701	-0.176751	-0.180393	-0.0786644	-0.217832	-0.212454	-0.202301	-0.182337	-0.229073	-0.273908	-0.297199	-0.266126	-0.308235	-0.153107	-0.0838278	-0.256633	-0.0560266	0.17459	0.0560106	FALSE	0.669437	-0.026907	FALSE	0.628116	0.0291036	FALSE	FALSE	static	-0.250205	-0.156669	-0.180664	-1.11893	0.806426	0.312509	0.806426
chr1	32380001	32390000	-0.399451	-0.235981	-0.480494	-0.488956	-0.369785	-0.194014	-0.368468	-0.195156	-0.271982	-0.109982	-0.263738	-0.621401	-0.257787	-0.233084	-0.293666	-0.179951	-0.0904699	-0.345606	-0.318412	-0.144043	0.0248751	-0.21217	-0.0547424	0.0752934	0.574127	0.0625893	FALSE	0.187313	0.14579	FALSE	0.0369458	0.208379	FALSE	FALSE	static	-0.340825	-0.233396	-0.0788618	-0.935036	-0.119236	1.05427	1.05427
chr1	32390001	32400000	-0.451714	-0.307275	-0.577557	-0.490657	-0.419905	-0.185008	-0.387786	-0.197845	-0.340286	-0.139774	-0.285085	-0.728014	-0.355496	-0.323335	-0.509218	-0.322778	-0.25728	-0.437055	-0.419711	-0.288518	-0.107203	-0.317113	-0.243938	-0.0252582	0.99061	0.00172	FALSE	0.334784	0.113489	FALSE	0.23677	0.115209	FALSE	FALSE	static	-0.377095	-0.312759	-0.213291	-0.92147	-0.141901	1.06337	1.06337
chr1	32410001	32420000	-0.324122	-0.28269	-0.371824	-0.33109	-0.325484	-0.0567393	-0.324464	-0.233157	-0.348345	-0.171161	-0.208832	-0.562887	-0.424092	-0.268259	-0.656718	-0.405638	-0.368696	-0.43709	-0.512859	-0.364594	-0.292492	-0.382728	-0.366753	-0.205884	0.363956	-0.099545	FALSE	0.904665	0.0143545	FALSE	0.19836	-0.0851905	FALSE	FALSE	static	-0.279944	-0.318957	-0.336459	1.10061	-0.247836	-0.852777	1.10061
chr1	32420001	32430000	-0.118673	-0.165794	-0.0857988	-0.127867	-0.135108	0.0510379	-0.221171	-0.173832	-0.240898	-0.0417219	-0.0992529	-0.368623	-0.344856	-0.167442	-0.620887	-0.297959	-0.333747	-0.300381	-0.432828	-0.304321	-0.269768	-0.331474	-0.271112	-0.207278	0.189632	-0.150554	FALSE	0.770289	-0.0336587	FALSE	0.00297911	-0.184213	TRUE	TRUE	down.late	-0.122096	-0.209442	-0.288261	1.01666	-0.0341942	-0.982464	1.01666
chr1	32430001	32440000	0.0313743	-0.0031762	0.156138	0.11473	0.0691045	0.147314	-0.0740816	-0.0566321	-0.105349	0.102285	0.0297134	-0.138209	-0.212456	-1.17915e-05	-0.584637	-0.125012	-0.210614	-0.0914945	-0.33662	-0.228896	-0.188981	-0.258604	-0.145244	-0.169235	0.181017	-0.177306	FALSE	0.554727	-0.0745012	FALSE	0.000862938	-0.251807	TRUE	TRUE	down.late	0.0507678	-0.06316	-0.192244	0.978576	0.0415517	-1.02013	0.978576
chr1	32440001	32450000	0.178507	0.124281	0.39661	0.306648	0.190364	0.249255	0.0617179	0.0803103	0.0269148	0.221882	0.174415	0.090457	-0.0352258	0.166283	-0.322448	0.101021	-0.073245	0.0882704	-0.140737	-0.101652	-0.0681688	-0.163581	0.0121435	-0.0669467	0.209985	-0.145549	FALSE	0.249585	-0.117152	FALSE	0.00245957	-0.262701	TRUE	TRUE	down.late	0.203962	0.103738	-0.0587532	0.912491	0.156551	-1.06904	0.912491
chr1	32650001	32660000	-0.202876	-0.129527	-0.187032	-0.343911	-0.268031	-0.421366	-0.5414	-0.128703	-0.268778	-0.146152	-0.074617	0.0281391	-0.114268	-0.11968	0.0114079	-0.133678	-0.14971	-0.0815722	-0.264992	-0.0686981	-0.00972078	-0.190908	-0.0544326	-0.163063	0.0853905	0.175653	FALSE	0.781201	-0.0206838	FALSE	0.0756095	0.154969	FALSE	FALSE	static	-0.253181	-0.0925114	-0.106254	-1.15126	0.652782	0.498477	0.652782
chr1	32660001	32670000	-0.210339	-0.156448	-0.224036	-0.272842	-0.2057	-0.3761	-0.580985	-0.174474	-0.277471	-0.123351	-0.066126	0.088059	-0.122797	-0.107385	0.0768992	-0.119485	-0.15156	-0.0876305	-0.285987	-0.0704098	-0.0142417	-0.156978	-0.0561549	-0.165428	0.0690768	0.193658	FALSE	0.60546	-0.0420916	FALSE	0.0725947	0.151567	FALSE	FALSE	static	-0.250985	-0.0724695	-0.108879	-1.13299	0.759487	0.373505	0.759487
chr1	32870001	32880000	-0.0226864	-0.262469	-0.250204	-0.0893074	-0.142409	-0.247571	0.00491618	-0.0337255	-0.136553	0.0284781	-0.0408557	-0.0295832	-0.0299067	-0.0548947	-0.0646591	-0.0624043	-0.331898	-0.196236	-0.310574	-0.249339	-0.198914	-0.42526	-0.11204	-0.0534989	0.237822	0.0816346	FALSE	0.0202057	-0.185923	FALSE	0.196548	-0.104288	FALSE	FALSE	static	-0.131908	-0.0368072	-0.217352	-0.0356428	1.01734	-0.981702	1.01734
chr1	32880001	32890000	-0.052721	-0.271951	-0.260587	-0.162829	-0.173771	-0.229667	-0.0087435	-0.0650294	-0.118994	0.0634906	-0.0536192	-0.0605871	-0.078226	-0.0658725	-0.0783802	-0.0721946	-0.325448	-0.205783	-0.352311	-0.199549	-0.161807	-0.438842	-0.129594	-0.0601051	0.146305	0.0951145	FALSE	0.0304027	-0.176132	FALSE	0.312522	-0.0810175	FALSE	FALSE	static	-0.156745	-0.0415511	-0.216171	-0.209386	1.08811	-0.878729	1.08811
chr1	33090001	33100000	-0.462941	-0.392331	-0.541667	-0.460641	-0.461638	-0.22934	-0.468375	-0.495244	-0.351869	-0.255439	-0.582302	-0.351318	-0.555455	-0.390931	-0.417686	-0.693971	-0.602986	-0.365846	-0.575328	-0.374784	-0.579177	-0.556524	-0.479091	-0.46939	0.926538	-0.0108494	FALSE	0.603139	-0.0505194	FALSE	0.351061	-0.0613687	FALSE	FALSE	static	-0.460826	-0.413576	-0.4925	-0.130725	1.05893	-0.928208	1.05893
chr1	33100001	33110000	-0.487652	-0.38956	-0.496732	-0.434893	-0.45375	-0.268622	-0.500192	-0.48291	-0.365427	-0.280021	-0.72888	-0.421549	-0.583222	-0.361949	-0.481126	-0.701973	-0.556242	-0.496588	-0.532671	-0.350241	-0.56799	-0.5694	-0.484018	-0.473039	0.641621	-0.0512295	FALSE	0.907041	-0.0132555	FALSE	0.220094	-0.0644849	FALSE	FALSE	static	-0.47621	-0.48288	-0.491813	0.948343	0.0963407	-1.04468	0.948343
chr1	33290001	33300000	-0.111704	-0.0876262	-0.0431431	0.104211	-0.0498484	0.00514614	-0.091455	0.108271	-0.20855	-0.0445323	0.0628376	-0.00797761	-0.0285772	-0.0136421	0.00068175	-0.10953	0.0466541	-0.0148802	-0.0125928	0.157742	0.0711658	0.0668462	-0.0490059	0.0264372	0.755144	-0.0228926	FALSE	0.141604	0.0802069	FALSE	0.283252	0.0573143	FALSE	FALSE	static	-0.0193093	-0.0296588	0.0355434	-0.423343	-0.718697	1.14204	1.14204
chr1	33460001	33470000	-0.543927	-0.849727	-0.728952	-0.70273	-0.658671	-0.498694	-0.415811	-0.519547	-0.635147	-0.685513	-0.847525	-0.743068	-0.725282	-0.828579	-0.591168	-0.654721	-0.495005	-0.501343	-0.530024	-0.384018	-0.52132	-0.504132	-0.386975	-0.527103	0.296815	-0.0991181	FALSE	0.00156154	0.232635	TRUE	0.100461	0.133517	FALSE	TRUE	up.late	-0.647527	-0.68844	-0.477892	-0.384335	-0.750814	1.13515	1.13515
chr1	33470001	33480000	-0.642996	-1.11491	-0.891343	-0.847051	-0.781136	-0.654278	-0.517102	-0.645029	-0.803398	-0.832381	-0.9585	-0.919818	-0.901294	-0.924615	-0.749835	-0.768667	-0.538143	-0.496388	-0.549562	-0.490047	-0.578985	-0.535929	-0.474187	-0.552673	0.412925	-0.0955825	FALSE	0.000129084	0.330325	TRUE	0.0374419	0.234742	FALSE	TRUE	up.late	-0.820919	-0.83622	-0.526634	-0.532951	-0.620639	1.15359	1.15359
chr1	33480001	33490000	-0.59706	-1.10007	-0.938004	-0.867263	-0.787092	-0.658902	-0.492021	-0.596821	-0.838845	-0.808227	-0.919406	-0.925385	-0.945943	-0.903309	-0.853042	-0.832791	-0.55531	-0.491493	-0.424308	-0.515506	-0.595538	-0.494507	-0.452741	-0.500142	0.31254	-0.123714	FALSE	4.41231e-06	0.374676	TRUE	0.0396474	0.250961	FALSE	TRUE	up.late	-0.803839	-0.850149	-0.504002	-0.449729	-0.696172	1.1459	1.1459
chr1	33630001	33640000	-0.40727	-0.521476	-0.609408	-0.454201	-0.463683	-0.408239	-0.366059	-0.46987	-0.459578	-0.541253	-0.582494	-0.365905	-0.592198	-0.536963	-0.315012	-0.374765	-0.283165	-0.262372	-0.419112	-0.401672	-0.457265	-0.400741	-0.431273	-0.460247	0.923581	-0.00849536	FALSE	0.234798	0.0815402	FALSE	0.16589	0.0730449	FALSE	FALSE	static	-0.447688	-0.450534	-0.389637	-0.53545	-0.61826	1.15371	1.15371
chr1	34570001	34580000	-0.290227	-0.173037	-0.315905	-0.105468	-0.0235654	-0.0478003	0.124898	0.00615533	-0.280984	-0.121543	-0.315521	-0.0421375	-0.152395	-0.213809	-0.214165	-0.484268	0.122282	0.0929342	0.176091	0.1846	0.162072	0.104665	0.144046	0.199	0.262764	-0.124984	FALSE	0.00163508	0.376314	TRUE	0.0123016	0.25133	FALSE	TRUE	down.early	-0.110801	-0.237384	0.141805	-0.217599	-0.873284	1.09088	1.09088
chr1	34740001	34750000	-0.535624	-0.565113	-0.42962	-0.447766	-0.363132	-0.30007	-0.371067	-0.302744	-0.327809	-0.455728	-0.488905	-0.476335	-0.254873	-0.574337	-0.453103	-0.451135	-0.252211	-0.107802	-0.265515	-0.161393	-0.388122	-0.25529	-0.329638	-0.178736	0.815125	-0.0208862	FALSE	0.0115423	0.19294	FALSE	0.0165375	0.172054	FALSE	FALSE	static	-0.414566	-0.411539	-0.241998	-0.592609	-0.561956	1.15456	1.15456
chr1	34750001	34760000	-0.524716	-0.589965	-0.457968	-0.501546	-0.361484	-0.365287	-0.335649	-0.366647	-0.372588	-0.504158	-0.501352	-0.503943	-0.318331	-0.682605	-0.457327	-0.449905	-0.274843	-0.197342	-0.331283	-0.245248	-0.443758	-0.30678	-0.370118	-0.232315	0.676372	-0.0358684	FALSE	0.0208788	0.173565	FALSE	0.0311356	0.137697	FALSE	FALSE	static	-0.443889	-0.450233	-0.299931	-0.539634	-0.614262	1.1539	1.1539
chr1	34970001	34980000	-0.107758	-0.275775	-0.130973	-0.193873	0.0126269	-0.217903	-0.163627	-0.0917618	-0.362865	-0.203089	-0.429156	-0.124966	-0.187529	-0.318953	-0.175051	0.0130558	0.0491708	-0.309142	-0.0686181	0.0127374	-0.15524	-0.0482292	-0.0886719	-0.106414	0.410366	-0.0774387	FALSE	0.150875	0.134268	FALSE	0.421638	0.0568295	FALSE	FALSE	static	-0.138577	-0.211193	-0.057534	-0.0365435	-0.981227	1.01777	1.01777
chr1	34980001	34990000	-0.110302	-0.290902	-0.142948	-0.151687	-0.0332483	-0.229763	-0.21852	-0.0940589	-0.246733	-0.220298	-0.467318	-0.073803	-0.184218	-0.248603	-0.142398	-0.0577829	0.0780406	-0.243101	-0.105032	0.00541843	-0.166361	-0.0801613	-0.0664074	-0.122457	0.610287	-0.0462155	FALSE	0.16305	0.117637	FALSE	0.263382	0.0714211	FALSE	FALSE	static	-0.147249	-0.189241	-0.0634274	-0.217673	-0.873235	1.09091	1.09091
chr1	35160001	35170000	-0.570951	-0.721789	-0.639179	-0.334821	-0.705954	-0.53462	-0.47376	-0.667936	-0.540434	-0.654749	-0.439686	-0.610127	-0.614556	-0.616629	-0.516092	-0.56415	-0.565087	-0.539471	-0.576147	-0.623666	-0.400981	-0.426853	-0.450237	-0.292264	0.909372	0.0115733	FALSE	0.212798	0.0852146	FALSE	0.253405	0.0967879	FALSE	FALSE	static	-0.55266	-0.525092	-0.46512	-0.857256	-0.241322	1.09858	1.09858
chr1	35170001	35180000	-0.681638	-0.842119	-0.74714	-0.441182	-0.931565	-0.632686	-0.656632	-0.759661	-0.642024	-0.734418	-0.520549	-0.68828	-0.782602	-0.663313	-0.62322	-0.653005	-0.663516	-0.647765	-0.679942	-0.718986	-0.459606	-0.51584	-0.551791	-0.379876	0.627616	0.0481516	FALSE	0.248876	0.0862611	FALSE	0.151496	0.134413	FALSE	FALSE	static	-0.676113	-0.614217	-0.555692	-1.0092	0.0186615	0.990539	0.990539
chr1	35400001	35410000	-0.0745405	-0.0269113	-0.07383	-0.252542	-0.00339701	-0.042347	-0.110329	-0.277739	-0.135233	-0.140807	0.00912448	-0.11334	-0.210202	-0.076667	0.00954943	-0.0552925	0.0821632	0.138181	-0.204051	0.107064	0.053583	-0.192111	-0.0814787	-0.0860413	0.820146	0.018596	FALSE	0.430639	0.066272	FALSE	0.314715	0.084868	FALSE	FALSE	static	-0.127617	-0.0631271	-0.0108146	-1.03288	0.0693809	0.963503	0.963503
chr1	35450001	35460000	-0.110573	-0.192396	-0.327687	-0.232538	-0.453755	-0.37633	-0.267329	-0.429839	-0.330482	-0.186549	-0.425246	-0.22873	-0.118213	-0.218361	-0.247927	-0.382275	-0.158836	0.0776731	-0.103595	-0.149195	-0.195977	-0.166926	-0.20709	-0.0858377	0.746019	0.0315827	FALSE	0.0500885	0.1435	FALSE	0.0266274	0.175083	FALSE	FALSE	static	-0.267745	-0.24762	-0.124094	-0.701866	-0.443132	1.145	1.145
chr1	35560001	35570000	-0.421471	-0.639915	-0.672102	-0.630976	-0.554519	-0.596429	-0.495267	-0.520103	-0.608284	-0.434109	-0.345591	-0.413186	-0.469102	-0.367642	-0.494897	-0.441419	-0.429801	-0.348843	-0.504166	-0.394514	-0.366851	-0.356641	-0.479817	-0.332329	0.0749167	0.119569	FALSE	0.413802	0.0451581	FALSE	0.00650506	0.164727	TRUE	TRUE	up.early	-0.569224	-0.4179	-0.399319	-1.14895	0.474785	0.674164	0.674164
chr1	35570001	35580000	-0.36188	-0.527244	-0.610961	-0.561948	-0.528856	-0.534153	-0.439811	-0.439539	-0.514371	-0.335655	-0.289638	-0.35931	-0.439953	-0.351913	-0.403315	-0.377991	-0.401386	-0.368354	-0.450915	-0.452816	-0.383881	-0.379313	-0.451869	-0.309113	0.0590137	0.116531	FALSE	0.753227	-0.0156878	FALSE	0.0424078	0.100843	FALSE	FALSE	static	-0.501262	-0.35022	-0.396776	-1.10117	0.851525	0.249647	0.851525
chr1	35800001	35810000	-0.224918	-0.245922	-0.236658	-0.148947	-0.14376	-0.332317	-0.116327	-0.0914509	-0.448657	-0.310394	-0.179089	-0.26387	-0.130561	-0.0191905	-0.161259	-0.167142	-0.0667363	-0.316841	-0.268721	-0.247198	-0.3076	-0.236947	-0.0586221	-0.250114	0.858474	-0.0174828	FALSE	0.929029	-0.00907712	FALSE	0.697239	-0.0265599	FALSE	FALSE	static	-0.187357	-0.27536	-0.192975	0.633431	-1.15282	0.519391	0.633431
chr1	36080001	36090000	-0.605766	-0.59148	-0.65874	-0.451214	-0.285826	-0.491949	-0.372827	-0.338858	-0.483764	-0.449517	-0.473397	-0.365627	-0.405614	-0.46343	-0.506389	-0.393856	-0.626051	-0.369	-0.336737	-0.507912	-0.527464	-0.642118	-0.54866	-0.529612	0.721198	0.0318831	FALSE	0.284679	-0.068245	FALSE	0.693435	-0.0363619	FALSE	FALSE	static	-0.524841	-0.4223	-0.516337	-0.650456	1.15147	-0.501017	1.15147
chr1	36090001	36100000	-0.497721	-0.452167	-0.529577	-0.400604	-0.207833	-0.450931	-0.336986	-0.266479	-0.451342	-0.328648	-0.358467	-0.27646	-0.367799	-0.296617	-0.392892	-0.347808	-0.571783	-0.301706	-0.222266	-0.429309	-0.445111	-0.571323	-0.506542	-0.452068	0.586807	0.0402829	FALSE	0.237119	-0.0850092	FALSE	0.603751	-0.0447263	FALSE	FALSE	static	-0.444782	-0.335407	-0.443597	-0.586754	1.15465	-0.567895	1.15465
chr1	36300001	36310000	-0.772184	-0.369161	-0.576472	-0.426584	-0.296835	-0.183451	-0.30508	-0.316391	-0.164648	-0.399014	-0.160514	-0.505368	-0.226858	-0.128691	-0.176952	-0.185004	0.0169704	-0.166447	-0.172884	-0.161804	-0.143822	-0.207519	0.0525008	-0.154358	0.206019	0.162389	FALSE	0.145435	0.126211	FALSE	0.0162206	0.2886	FALSE	FALSE	static	-0.397412	-0.207365	-0.107441	-1.08625	0.203942	0.882308	0.882308
chr1	36450001	36460000	-0.868329	-0.927414	-0.88268	-1.01841	-0.705536	-0.734953	-0.459596	-0.930061	-0.746447	-0.891519	-0.741171	-0.804844	-0.722599	-0.765775	-0.799434	-0.785862	-0.380981	-0.442619	-0.292053	-0.49978	-0.418111	-0.4947	-0.541489	-0.387074	0.773107	0.0336654	FALSE	5.69667e-05	0.350106	TRUE	0.00331495	0.383771	TRUE	TRUE	up.late	-0.819147	-0.757344	-0.436423	-0.721182	-0.420384	1.14157	1.14157
chr1	36460001	36470000	-0.897267	-0.957627	-0.960376	-1.02157	-0.803339	-0.849522	-0.48953	-1.01013	-0.818411	-0.899563	-0.758527	-0.855643	-0.77391	-0.788378	-0.869978	-0.831064	-0.414909	-0.538127	-0.316683	-0.481254	-0.441927	-0.485909	-0.556139	-0.376069	0.652047	0.0492361	FALSE	4.18996e-05	0.373057	TRUE	0.00176816	0.422293	TRUE	TRUE	up.late	-0.873422	-0.800972	-0.456021	-0.732104	-0.407264	1.13937	1.13937
chr1	36470001	36480000	-0.822786	-0.879754	-0.981086	-0.96745	-0.836923	-0.83394	-0.536044	-0.960668	-0.794906	-0.831413	-0.746637	-0.835258	-0.776031	-0.703905	-0.879993	-0.804713	-0.407303	-0.509601	-0.305298	-0.456456	-0.462099	-0.440835	-0.507514	-0.364349	0.533731	0.0557244	FALSE	1.46072e-05	0.364925	TRUE	0.000685894	0.42065	TRUE	TRUE	up.late	-0.847146	-0.770965	-0.438557	-0.743721	-0.393097	1.13682	1.13682
chr1	37440001	37450000	-0.92987	-1.07984	-1.00026	-1.03407	-0.72872	-0.811483	-0.879146	-0.834711	-1.01589	-0.823132	-0.804794	-0.998276	-0.908388	-0.99282	-0.967077	-0.794101	-0.614163	-0.815968	-0.783279	-0.734434	-0.60202	-0.794487	-0.631275	-0.727174	0.993378	-0.000796764	FALSE	0.00675274	0.200209	TRUE	0.0140162	0.199413	FALSE	TRUE	up.late	-0.911419	-0.875924	-0.680795	-0.714343	-0.428504	1.14285	1.14285
chr1	37450001	37460000	-0.718385	-0.90545	-0.785917	-0.879405	-0.61191	-0.68772	-0.712186	-0.740411	-0.819906	-0.602751	-0.613545	-0.767979	-0.714031	-0.846328	-0.781217	-0.577211	-0.518755	-0.678561	-0.596483	-0.616443	-0.467292	-0.641088	-0.479829	-0.514194	0.641562	0.039802	FALSE	0.0348474	0.15129	FALSE	0.00722106	0.191092	TRUE	TRUE	up.late	-0.752916	-0.674563	-0.530374	-0.88852	-0.194409	1.08293	1.08293
chr1	37680001	37690000	-0.577169	-0.455821	-0.566144	-0.469629	-0.36484	-0.494404	-0.30524	-0.346747	-0.480363	-0.426418	-0.393715	-0.328654	-0.35187	-0.393683	-0.143465	-0.590366	-0.511414	-0.475284	-0.409347	-0.475754	-0.488028	-0.464631	-0.605722	-0.452558	0.528159	0.0589327	FALSE	0.198458	-0.0967757	FALSE	0.522007	-0.037843	FALSE	FALSE	static	-0.457495	-0.379826	-0.50902	-0.133997	1.06024	-0.926246	1.06024
chr1	37690001	37700000	-0.569077	-0.449792	-0.594936	-0.430014	-0.363379	-0.491707	-0.325725	-0.427077	-0.492404	-0.429915	-0.390546	-0.355537	-0.414712	-0.487508	-0.119253	-0.624387	-0.457797	-0.448635	-0.365135	-0.449167	-0.53301	-0.46572	-0.586651	-0.469578	0.683831	0.042181	FALSE	0.513985	-0.0576791	FALSE	0.803438	-0.0154981	FALSE	FALSE	static	-0.467564	-0.395733	-0.482179	-0.412179	1.14021	-0.728031	1.14021
chr1	37700001	37710000	-0.449732	-0.354535	-0.512814	-0.320203	-0.282656	-0.336952	-0.24566	-0.38951	-0.430822	-0.375969	-0.300192	-0.304196	-0.403668	-0.491898	-0.01821	-0.524725	-0.308393	-0.309174	-0.240436	-0.247963	-0.439027	-0.371795	-0.447658	-0.355873	0.965397	0.00529777	FALSE	0.882315	0.0161701	FALSE	0.732587	0.0214679	FALSE	FALSE	static	-0.371626	-0.330546	-0.336798	-1.14313	0.712787	0.430341	0.712787
chr1	38000001	38010000	-1.05504	-0.873913	-0.94315	-0.826912	-0.921084	-0.798608	-0.795673	-0.814962	-0.819865	-0.714416	-0.639243	-0.650257	-0.823172	-0.629037	-0.661774	-0.635646	-0.764747	-0.8079	-0.784234	-0.593926	-0.808903	-0.83225	-0.800582	-0.842863	0.0172265	0.181992	FALSE	0.158396	-0.0827498	FALSE	0.0949677	0.0992425	FALSE	FALSE	static	-0.88341	-0.684781	-0.771695	-1.03893	0.955897	0.0830291	0.955897
chr1	38010001	38020000	-1.20401	-0.891352	-1.01435	-0.835953	-0.928515	-0.876639	-0.81612	-0.832183	-0.845332	-0.787615	-0.7221	-0.714009	-0.880651	-0.741304	-0.712896	-0.760753	-0.804335	-0.839072	-0.835483	-0.658125	-0.751463	-0.883916	-0.913066	-0.944159	0.0763244	0.154308	FALSE	0.322242	-0.05812	FALSE	0.22195	0.0961877	FALSE	FALSE	static	-0.929122	-0.754123	-0.815771	-1.08284	0.888681	0.194161	0.888681
chr1	38840001	38850000	-1.21983	-1.1683	-1.48455	-1.26681	-1.03527	-1.14514	-0.881043	-0.876755	-1.14581	-1.07293	-1.05779	-1.00468	-0.967338	-0.774771	-0.987508	-0.949114	-0.840477	-0.718394	-0.730415	-0.852336	-0.896199	-0.792796	-0.737464	-0.86863	0.282272	0.139722	FALSE	0.0126463	0.190404	FALSE	0.0131337	0.330125	FALSE	FALSE	static	-1.1377	-0.996475	-0.783215	-0.925911	-0.134553	1.06046	1.06046
chr1	38850001	38860000	-1.10123	-1.08786	-1.32638	-1.2203	-1.01291	-1.17696	-0.79082	-0.850322	-1.09241	-0.942818	-0.970854	-0.873723	-0.936341	-0.735332	-0.865246	-0.898274	-0.765421	-0.602262	-0.673778	-0.807246	-0.842866	-0.779222	-0.639775	-0.755591	0.185563	0.156472	FALSE	0.0150202	0.181105	FALSE	0.00691596	0.337577	TRUE	TRUE	up.late	-1.06704	-0.910115	-0.713197	-0.960286	-0.0751848	1.03547	1.03547
chr1	39090001	39100000	-0.95659	-0.845	-0.840798	-1.09518	-0.657469	-0.921638	-0.78366	-0.742676	-0.664411	-0.790628	-0.820115	-0.833871	-0.677674	-0.991966	-0.581542	-0.715739	-0.975718	-0.668763	-0.966753	-0.91341	-0.803529	-0.631711	-0.961386	-0.755326	0.352211	0.0958831	FALSE	0.459259	-0.0750811	FALSE	0.846702	0.020802	FALSE	FALSE	static	-0.854081	-0.723342	-0.790048	-0.993116	1.00674	-0.0136286	1.00674
chr1	39100001	39110000	-0.803566	-0.714431	-0.71181	-1.01291	-0.53856	-0.843521	-0.68605	-0.58087	-0.545173	-0.67657	-0.643959	-0.680396	-0.526443	-0.77214	-0.471845	-0.535867	-0.789752	-0.50088	-0.770196	-0.731333	-0.670808	-0.541652	-0.758926	-0.579259	0.202025	0.129916	FALSE	0.452253	-0.0613018	FALSE	0.471749	0.0686144	FALSE	FALSE	static	-0.728531	-0.580865	-0.619334	-1.11771	0.809943	0.307766	0.809943
chr1	39270001	39280000	-0.0210474	-0.00414385	-0.19571	0.108505	-0.193718	-0.210558	-0.174184	-0.125676	0.012316	0.00530971	-0.0498664	0.132906	0.0282228	0.00795102	-0.169908	0.141856	0.0423229	-0.0229131	-0.00512619	0.101652	0.0305896	0.140224	0.122672	-0.0556394	0.174015	0.115665	FALSE	0.657703	0.0306244	FALSE	0.0416261	0.146289	FALSE	FALSE	static	-0.0491201	0.0391904	0.0731595	-1.11211	0.286974	0.825138	0.825138
chr1	39510001	39520000	0.0509043	0.113061	0.0646789	-0.0652344	-0.189538	0.109956	0.0746182	0.259742	0.269496	0.175101	0.26423	0.160531	-0.0857356	0.334798	0.0208041	0.283906	0.0952182	0.253221	0.060962	0.0990266	0.332844	0.333023	0.25051	0.282082	0.245741	0.125618	FALSE	0.736447	0.0354694	FALSE	0.064073	0.161087	FALSE	FALSE	static	0.0485665	0.201694	0.223745	-1.14697	0.457928	0.689038	0.689038
chr1	39540001	39550000	-0.169434	-0.186523	-0.347228	-0.141268	-0.412614	-0.34568	-0.0290976	-0.0997247	-0.0695047	-0.207708	-0.0310042	-0.299708	-0.439046	0.109442	-0.0574002	-0.169534	-0.300496	-0.324887	-0.116679	-0.12439	0.132997	-0.0422309	-0.116192	0.100108	0.576618	0.0708882	FALSE	0.734255	0.0465867	FALSE	0.265477	0.117475	FALSE	FALSE	static	-0.220601	-0.137572	-0.0854608	-1.06699	0.151205	0.915787	0.915787
chr1	39760001	39770000	0.0316443	-0.181042	-0.136533	0.138436	0.018239	-0.151719	-0.268908	-0.0982182	-0.021528	-0.0327642	-0.0382573	-0.089582	-0.00280531	-0.254298	-0.247629	-0.0109413	-0.0743325	-0.171687	0.070563	0.0411785	-0.0140364	0.00343063	-0.305754	-0.00773375	0.956835	-0.00621298	FALSE	0.751382	0.0299292	FALSE	0.813719	0.0237162	FALSE	FALSE	static	-0.0686342	-0.0552875	-0.015296	-0.800843	-0.319987	1.12083	1.12083
chr1	39770001	39780000	-0.148196	-0.278036	-0.104999	0.0574195	-0.0247325	-0.27977	-0.368912	-0.168218	-0.0626487	-0.0930685	-0.186224	-0.0977303	-0.0403138	-0.261843	-0.315777	-0.0551836	-0.212735	-0.324884	-0.0211187	-0.10303	-0.116373	-0.159085	-0.362962	-0.0305594	0.821248	0.0253319	FALSE	0.777619	-0.0272449	FALSE	0.986977	-0.00191299	FALSE	FALSE	static	-0.151288	-0.105812	-0.128658	-0.998413	1.00158	-0.00316692	1.00158
chr1	39810001	39820000	-0.421205	-0.369271	-0.0993622	-0.236888	-0.132658	-0.306445	-0.391977	-0.355199	-0.173006	-0.158013	-0.293288	-0.283955	-0.179212	-0.091658	-0.364608	-0.270913	-0.468063	-0.464706	-0.383116	-0.489826	-0.350034	-0.160454	-0.495948	-0.112685	0.465609	0.0622941	FALSE	0.136563	-0.138772	FALSE	0.430787	-0.0764783	FALSE	FALSE	static	-0.284458	-0.192942	-0.320326	-0.282393	1.11083	-0.828438	1.11083
chr1	40030001	40040000	-0.253231	-0.558969	-0.183835	-0.305652	-0.298902	-0.585684	-0.216314	-0.21695	-0.155759	-0.235275	-0.125879	-0.12074	-0.328932	-0.260811	-0.580718	-0.535287	-0.324031	-0.414026	-0.283872	-0.300041	-0.234295	-0.102882	-0.146115	-0.248223	0.820146	0.0345169	FALSE	0.763737	0.0362393	FALSE	0.450482	0.0707562	FALSE	FALSE	static	-0.312274	-0.208825	-0.213509	-1.15377	0.616975	0.536797	0.616975
chr1	40040001	40050000	-0.502768	-0.832206	-0.531029	-0.646142	-0.424305	-0.758558	-0.405283	-0.409238	-0.421161	-0.397702	-0.342541	-0.302179	-0.512675	-0.527392	-0.741528	-0.668535	-0.478766	-0.550545	-0.532775	-0.426029	-0.425257	-0.307021	-0.355385	-0.438183	0.568093	0.074477	FALSE	0.611799	0.0499691	FALSE	0.180947	0.124446	FALSE	FALSE	static	-0.555934	-0.406125	-0.402352	-1.15443	0.555681	0.598751	0.598751
chr1	40100001	40110000	-0.393195	-0.328139	-0.448275	-0.333736	-0.334042	-0.155965	-0.262664	-0.250684	-0.427796	-0.120091	-0.166927	-0.294102	-0.305376	-0.316847	-0.351722	-0.0990073	0.164483	-0.117038	0.127593	0.185974	0.218067	0.11475	0.188347	0.243428	0.532166	0.0531038	FALSE	0.000424659	0.400934	TRUE	7.57259e-05	0.454038	TRUE	TRUE	up.late	-0.315591	-0.218522	0.182661	-0.751265	-0.383776	1.13504	1.13504
chr1	40430001	40440000	-0.122063	-0.208301	-0.197708	-0.303557	-0.261751	-0.434733	-0.0444929	-0.336143	-0.30431	-0.170371	-0.350457	-0.216062	-0.0711766	-0.279358	-0.352595	-0.236874	-0.153857	-0.346988	-0.235295	-0.332407	-0.193119	-0.0831456	-0.28516	-0.118894	0.931737	-0.00905674	FALSE	0.711256	0.0290421	FALSE	0.81845	0.0199854	FALSE	FALSE	static	-0.197889	-0.197156	-0.177221	-0.608335	-0.545801	1.15414	1.15414
chr1	40530001	40540000	0.0838936	0.10345	0.190238	0.16916	0.199863	0.217768	0.102243	0.134158	0.0336627	0.0174141	0.037121	0.112833	-0.0894564	0.135757	0.0264659	0.0248166	0.0688117	0.0505207	0.10681	-0.00869211	0.121092	0.197079	0.0957446	0.0162947	0.0308852	-0.11277	FALSE	0.377738	0.0436308	FALSE	0.0917058	-0.0691391	FALSE	FALSE	static	0.165058	0.055654	0.125896	0.893364	-1.08026	0.186899	0.893364
chr1	40580001	40590000	-0.0227294	-0.0223826	-0.0112407	-0.0505423	0.0474095	0.237466	-0.207104	0.159268	0.0732186	-0.0502068	0.0902694	0.102712	-0.00838478	0.0499167	0.00834507	0.0402687	0.126551	-0.123769	-0.115887	0.0310797	0.0774062	0.00929656	0.0906657	-0.0180394	0.813943	0.0219992	FALSE	0.632335	-0.0286045	FALSE	0.945774	-0.00660532	FALSE	FALSE	static	0.0343076	0.0748991	0.0446939	-0.805844	1.11914	-0.313292	1.11914
chr1	40590001	40600000	-0.0327076	-0.0504434	-0.0184988	0.00595239	0.00542859	0.20835	-0.129062	0.122235	0.108061	0.0517364	0.0782664	0.0873469	0.0451304	0.0522695	0.0505851	0.138441	0.0939938	-0.11672	-0.125295	0.00892623	0.119132	-0.0195339	0.0724631	-0.00459205	0.323905	0.0625728	FALSE	0.166403	-0.072933	FALSE	0.895896	-0.0103601	FALSE	FALSE	static	0.0317039	0.105467	0.0337321	-0.60132	1.15436	-0.553044	1.15436
chr1	40840001	40850000	-0.700981	-0.521947	-0.428449	-0.420904	-0.297316	-0.267423	0.0346773	-0.346392	-0.303043	-0.239887	-0.337855	-0.271676	-0.353281	-0.209963	-0.067658	-0.20392	-0.625543	-0.706483	-0.431203	-0.356936	-0.0123761	-0.0789834	-0.178143	-0.26783	0.361745	0.120182	FALSE	0.574913	-0.0837767	FALSE	0.8411	0.0364049	FALSE	FALSE	static	-0.4901	-0.312129	-0.244373	-1.1128	0.28947	0.823333	0.823333
chr1	40970001	40980000	-0.38782	-0.612464	-0.542172	-0.457674	-0.531673	-0.373666	-0.609295	-0.364872	-0.413388	-0.24652	-0.384159	-0.459741	-0.408019	-0.269677	-0.203116	-0.326242	-0.663787	-0.390528	-0.259645	-0.504349	-0.28794	-0.12869	-0.332105	-0.180773	0.0665917	0.146097	FALSE	0.972139	-0.00461955	FALSE	0.164023	0.141477	FALSE	FALSE	static	-0.458241	-0.30906	-0.274539	-1.13651	0.391468	0.745045	0.745045
chr1	41000001	41010000	-0.436196	-0.683355	-0.519044	-0.621548	-0.461034	-0.331327	-0.585462	-0.432013	-0.496505	-0.297434	-0.406764	-0.371591	-0.423094	-0.289245	-0.204045	-0.266407	-0.377808	-0.466856	-0.19303	-0.363535	-0.236441	-0.0478531	-0.270374	-0.0362401	0.0611817	0.164362	FALSE	0.32086	0.0953684	FALSE	0.0136454	0.25973	FALSE	FALSE	static	-0.474038	-0.323738	-0.168243	-0.99429	-0.0113232	1.00561	1.00561
chr1	41010001	41020000	-0.4398	-0.649824	-0.477337	-0.685303	-0.485753	-0.378167	-0.508553	-0.451769	-0.538087	-0.33906	-0.342622	-0.332436	-0.357759	-0.344017	-0.234026	-0.178403	-0.258676	-0.497363	-0.122128	-0.307939	-0.243935	-0.066647	-0.28576	0.0283765	0.0443055	0.176262	FALSE	0.261326	0.114042	FALSE	0.00902391	0.290305	TRUE	TRUE	up.late	-0.470364	-0.314318	-0.138846	-0.979907	-0.0390417	1.01895	1.01895
chr1	41020001	41030000	-0.384792	-0.645691	-0.414314	-0.651641	-0.505447	-0.454841	-0.485027	-0.492624	-0.472896	-0.348685	-0.258209	-0.268966	-0.247202	-0.385453	-0.243351	-0.134101	-0.15998	-0.522181	-0.137448	-0.303	-0.237602	-0.0351842	-0.329203	0.0422348	0.0186106	0.209439	FALSE	0.449729	0.0845625	FALSE	0.0122684	0.294002	FALSE	FALSE	static	-0.457528	-0.278306	-0.124396	-1.02434	0.0506063	0.973736	0.973736
chr1	41230001	41240000	-0.325404	-0.173257	-0.412495	-0.246404	-0.367047	-0.337421	-0.377797	-0.0632696	-0.142378	-0.185694	-0.294636	-0.251721	-0.388279	-0.0870548	-0.314952	-0.198437	-0.494147	-0.201684	-0.398336	-0.567057	-0.144393	-0.117892	-0.063533	-0.228576	0.533916	0.054993	FALSE	0.717917	-0.0440583	FALSE	0.932918	0.0109347	FALSE	FALSE	static	-0.278957	-0.190857	-0.19232	-1.15458	0.591789	0.56279	0.591789
chr1	41250001	41260000	-0.507854	-0.460509	-0.58684	-0.567839	-0.467879	-0.862312	-0.557687	-0.395105	-0.396092	-0.383731	-0.552396	-0.483193	-0.637577	-0.395856	-0.64629	-0.485191	-0.560386	-0.412546	-0.504054	-0.700121	-0.508654	-0.252758	-0.368357	-0.444169	0.609458	0.0532124	FALSE	0.775938	0.0286601	FALSE	0.399345	0.0818726	FALSE	FALSE	static	-0.561007	-0.44425	-0.413614	-1.13208	0.369092	0.762992	0.762992
chr1	41260001	41270000	-0.41832	-0.404177	-0.481134	-0.564154	-0.365737	-0.766977	-0.482534	-0.376907	-0.308838	-0.316733	-0.519238	-0.436664	-0.599761	-0.39527	-0.617826	-0.515309	-0.448579	-0.345212	-0.414087	-0.567677	-0.534336	-0.212501	-0.3834	-0.404071	0.870634	0.0187878	FALSE	0.579248	0.0499722	FALSE	0.426465	0.06876	FALSE	FALSE	static	-0.48926	-0.397956	-0.377007	-1.13678	0.39291	0.743873	0.743873
chr1	41490001	41500000	-0.352846	-0.369661	-0.379433	-0.288942	-0.335696	-0.55084	-0.285699	-0.191843	-0.341079	-0.351693	-0.323934	-0.340598	-0.214997	-0.220548	-0.250354	-0.460799	-0.278362	-0.286564	-0.142709	-0.138467	-0.0757652	-0.137892	-0.0255009	-0.00384491	0.69202	0.0313697	FALSE	0.017361	0.176862	FALSE	0.00963737	0.208232	TRUE	TRUE	up.late	-0.35032	-0.284717	-0.0778173	-0.792416	-0.331155	1.12357	1.12357
chr1	41500001	41510000	-0.521271	-0.522531	-0.474018	-0.350448	-0.379419	-0.605013	-0.355781	-0.217463	-0.53911	-0.416214	-0.373607	-0.44839	-0.282223	-0.284897	-0.352169	-0.602349	-0.51471	-0.434807	-0.299038	-0.295359	-0.226618	-0.219171	-0.279006	-0.161859	0.888259	0.0158731	FALSE	0.198977	0.108549	FALSE	0.139274	0.124422	FALSE	FALSE	static	-0.433997	-0.38638	-0.250807	-0.809433	-0.308456	1.11789	1.11789
chr1	41540001	41550000	-0.495424	-0.485196	-0.593526	-0.387201	-0.402317	-0.299055	-0.418463	-0.170394	-0.493965	-0.287488	-0.366152	-0.408425	-0.144502	-0.098566	-0.418784	-0.449133	-0.577268	-0.598153	-0.661282	-0.612324	-0.436807	-0.320465	-0.544893	-0.271112	0.507844	0.0730701	FALSE	0.109253	-0.169411	FALSE	0.313948	-0.0963411	FALSE	FALSE	static	-0.404031	-0.319284	-0.461487	-0.127168	1.0575	-0.930333	1.0575
chr1	41550001	41560000	-0.41932	-0.413631	-0.525575	-0.417128	-0.444253	-0.234428	-0.418359	-0.156647	-0.325039	-0.233705	-0.341256	-0.394834	-0.144959	-0.0608385	-0.333438	-0.248972	-0.380979	-0.534021	-0.545176	-0.506262	-0.388313	-0.37188	-0.487968	-0.211018	0.194971	0.118287	FALSE	0.0466001	-0.167822	FALSE	0.555044	-0.0495345	FALSE	FALSE	static	-0.375035	-0.252895	-0.398173	-0.422764	1.14195	-0.719184	1.14195
chr1	41580001	41590000	-0.233235	-0.275471	-0.159883	-0.324775	-0.418996	-0.0950701	-0.211647	-0.1796	0.0485166	-0.112456	-0.0775782	-0.197336	-0.26358	-0.00943215	-0.0382703	0.100491	-0.105944	-0.213452	-0.380502	-0.192413	-0.168861	-0.403805	-0.291256	-0.165643	0.0661864	0.168629	FALSE	0.0467121	-0.171529	FALSE	0.974063	-0.00289997	FALSE	FALSE	static	-0.22684	-0.053585	-0.229227	-0.565463	1.15462	-0.589156	1.15462
chr1	41800001	41810000	-0.375704	-0.449731	-0.4969	-0.431344	-0.191042	-0.302082	-0.305875	-0.275404	-0.296241	-0.237154	-0.285625	-0.347652	-0.215054	-0.502302	-0.17639	-0.107498	-0.345673	-0.383247	-0.377026	-0.25871	-0.320465	-0.171491	-0.42874	-0.230715	0.343983	0.0825208	FALSE	0.598163	-0.0435188	FALSE	0.572002	0.0390019	FALSE	FALSE	static	-0.357662	-0.252869	-0.28843	-1.08853	0.877916	0.210617	0.877916
chr1	41810001	41820000	-0.250717	-0.397548	-0.37119	-0.3999	-0.13067	-0.240793	-0.199056	-0.231021	-0.226547	-0.140197	-0.229576	-0.281647	-0.133147	-0.435575	-0.122261	-0.021836	-0.301828	-0.394478	-0.394254	-0.272157	-0.246994	-0.0719378	-0.311335	-0.171956	0.37644	0.0787638	FALSE	0.417353	-0.0717693	FALSE	0.935397	0.00699451	FALSE	FALSE	static	-0.280416	-0.181545	-0.230646	-1.00225	0.997732	0.00452143	0.997732
chr1	42040001	42050000	0.276272	0.169567	0.0819022	0.186113	-0.0470936	-0.0532371	0.0862108	0.10209	0.0162858	0.10007	0.123723	0.108789	-0.0750467	0.121511	0.0360339	-0.0269318	-0.364619	-0.154436	-0.314885	-0.291047	-0.216566	-0.138791	-0.03012	-0.0671816	0.522461	-0.0496738	FALSE	0.00512827	-0.24776	TRUE	0.00244183	-0.297434	TRUE	TRUE	down.late	0.168718	0.0804073	-0.140984	0.831557	0.27804	-1.1096	0.831557
chr1	42130001	42140000	-0.473121	-0.34554	-0.391593	-0.449937	-0.462781	-0.337553	-0.416124	-0.210096	-0.280292	-0.338307	-0.330523	-0.424822	-0.316003	-0.548236	-0.397364	-0.550597	-0.537695	-0.564305	-0.460191	-0.748031	-0.46659	-0.549303	-0.717724	-0.438458	0.891122	-0.0124249	FALSE	0.0496731	-0.162019	FALSE	0.023272	-0.174444	FALSE	FALSE	static	-0.386926	-0.357109	-0.528472	0.4068	0.732487	-1.13929	0.732487
chr1	42140001	42150000	-0.610735	-0.427088	-0.57645	-0.624702	-0.516927	-0.418926	-0.47484	-0.342119	-0.396893	-0.478516	-0.47308	-0.56448	-0.431326	-0.554587	-0.458719	-0.640829	-0.633587	-0.643178	-0.649106	-0.831905	-0.556576	-0.619141	-0.75827	-0.549627	0.991961	-0.000830439	FALSE	0.0238358	-0.15537	FALSE	0.0298992	-0.1562	FALSE	FALSE	static	-0.507088	-0.467827	-0.619337	0.309413	0.808723	-1.11814	0.808723
chr1	42150001	42160000	-0.708701	-0.539509	-0.713491	-0.757345	-0.580915	-0.516968	-0.460196	-0.457212	-0.463879	-0.582096	-0.560628	-0.647396	-0.535809	-0.488089	-0.500661	-0.658035	-0.65417	-0.688536	-0.747637	-0.87856	-0.569087	-0.579718	-0.74596	-0.61159	0.655937	0.037218	FALSE	0.0561271	-0.129833	FALSE	0.235387	-0.0926151	FALSE	FALSE	static	-0.604714	-0.533732	-0.641576	-0.207484	1.08747	-0.879982	1.08747
chr1	42340001	42350000	-0.545313	-0.579598	-0.503177	-0.559273	-0.531171	-0.522628	-0.361198	-0.169815	-0.394188	-0.343992	-0.408642	-0.267721	-0.550258	-0.470932	-0.440661	-0.415407	-0.0474765	-0.221307	-0.350421	-0.205273	-0.0888719	-0.0379523	-0.0813237	-0.0359497	0.51994	0.0600464	FALSE	0.00222228	0.277903	TRUE	0.00206393	0.33795	TRUE	TRUE	up.late	-0.471008	-0.371056	-0.0622164	-0.795763	-0.326736	1.1225	1.1225
chr1	42350001	42360000	-0.418315	-0.531378	-0.430765	-0.406034	-0.401252	-0.436911	-0.319819	-0.0507259	-0.316875	-0.279034	-0.330671	-0.214033	-0.57417	-0.387948	-0.402387	-0.421417	0.00394788	-0.131004	-0.35763	-0.196482	-0.0159745	-0.0257108	-0.0503445	0.0212595	0.944153	0.00858293	FALSE	0.0062309	0.271825	TRUE	0.00849781	0.280408	TRUE	TRUE	up.late	-0.371264	-0.318967	-0.0218854	-0.710529	-0.433001	1.14353	1.14353
chr1	42480001	42490000	0.27342	0.0228226	0.04245	0.0826826	-0.144431	-0.140464	0.250826	0.0963218	0.00821798	0.0112703	0.031917	0.0629264	0.201624	0.157033	-0.103251	0.208865	-0.100208	-0.144005	-0.29882	-0.206203	-0.0934681	-0.205368	-0.0706327	-0.0036479	0.925633	0.0118718	FALSE	0.00972305	-0.212619	TRUE	0.0359662	-0.200747	FALSE	TRUE	down.late	0.116932	0.0786067	-0.0808107	0.750358	0.384901	-1.13526	0.750358
chr1	42760001	42770000	-0.599646	-0.529096	-0.707074	-0.582992	-0.478033	-0.623344	-0.707438	-0.539047	-0.390707	-0.455929	-0.391048	-0.276373	-0.550724	-0.456755	-0.468684	-0.677347	-0.616989	-0.620877	-0.688729	-0.636886	-0.425383	-0.494271	-0.449546	-0.558675	0.0986026	0.137388	FALSE	0.192687	-0.102974	FALSE	0.596086	0.0344143	FALSE	FALSE	static	-0.592374	-0.414609	-0.518307	-0.940094	1.05071	-0.110614	1.05071
chr1	42770001	42780000	-0.558766	-0.4192	-0.647811	-0.57528	-0.468258	-0.583214	-0.633195	-0.414889	-0.372795	-0.390997	-0.399362	-0.240299	-0.472676	-0.384794	-0.406326	-0.557074	-0.559042	-0.612868	-0.675291	-0.570427	-0.372898	-0.37766	-0.374033	-0.53061	0.0690574	0.134536	FALSE	0.170907	-0.106063	FALSE	0.723102	0.0284729	FALSE	FALSE	static	-0.532707	-0.369433	-0.462544	-0.950028	1.04342	-0.093392	1.04342
chr1	42910001	42920000	-0.434496	-0.51458	-0.722139	-0.615161	-0.61622	-0.575666	-0.592752	-0.432582	-0.556007	-0.539368	-0.3938	-0.489038	-0.479692	-0.628182	-0.440415	-0.521331	-0.749646	-0.743494	-0.626343	-0.60688	-0.315591	-0.365508	-0.268311	-0.318787	0.40472	0.0569703	FALSE	0.961709	0.00665902	FALSE	0.586434	0.0636293	FALSE	FALSE	static	-0.543292	-0.482603	-0.398019	-0.940936	-0.109169	1.05011	1.05011
chr1	43170001	43180000	-0.129246	0.00487699	-0.0907224	-0.256493	-0.198346	-0.114635	-0.0871006	-0.201959	-0.0609144	-0.179734	0.0483803	-0.05816	-0.395615	-0.0835191	0.00427848	-0.11704	0.0709892	-0.0936254	-0.378325	-0.140331	0.19495	0.11361	0.0173637	-0.0234793	0.771635	0.0289125	FALSE	0.542417	0.0754344	FALSE	0.291878	0.104347	FALSE	FALSE	static	-0.117346	-0.0590039	0.0602198	-0.868851	-0.224228	1.09308	1.09308
chr1	43180001	43190000	-0.189899	-0.0718287	-0.180406	-0.311896	-0.211781	-0.110834	-0.164191	-0.196724	-0.128942	-0.181947	-0.00665342	-0.0986707	-0.393208	-0.0158787	-0.0300839	-0.127975	-0.0522108	-0.223317	-0.631178	-0.25649	0.0579316	0.0718122	-0.120366	-0.109301	0.493067	0.0567749	FALSE	0.820916	-0.0349699	FALSE	0.871042	0.0218051	FALSE	FALSE	static	-0.169967	-0.0833332	-0.0556638	-1.1232	0.329598	0.793598	0.793598
chr1	43200001	43210000	-0.327506	-0.350563	-0.323715	-0.431823	-0.286261	-0.148605	-0.393371	-0.290292	-0.358152	-0.187516	-0.217816	-0.230082	-0.382967	-0.0935599	-0.324476	-0.180838	-0.21231	-0.427883	-0.954218	-0.55751	-0.213215	-0.197242	-0.319737	-0.291833	0.319419	0.072091	FALSE	0.313001	-0.149818	FALSE	0.582532	-0.0777267	FALSE	FALSE	static	-0.318104	-0.216369	-0.301385	-0.72376	1.14106	-0.417305	1.14106
chr1	43420001	43430000	-0.184064	-0.186696	-0.133945	-0.174368	-0.185444	-0.0942044	-0.0572455	-0.0295249	-0.0498702	-0.171283	-0.165307	-0.0921175	-0.130132	-0.141191	-0.0908814	-0.151466	-0.159304	-0.230503	-0.0417757	-0.283562	0.08407	-0.0101704	0.0912716	-0.0203406	0.896975	0.00665551	FALSE	0.519306	0.0527417	FALSE	0.446768	0.0593972	FALSE	FALSE	static	-0.141219	-0.0830444	-0.0122199	-0.965766	-0.0652694	1.03104	1.03104
chr1	43530001	43540000	-0.290902	-0.427677	-0.373071	-0.221957	-0.432256	-0.242003	-0.227162	-0.097079	-0.309846	-0.316633	-0.234293	-0.21348	-0.245471	-0.192217	-0.486715	-0.152578	-0.311816	-0.324288	-0.276048	-0.102205	0.0146478	-0.00103303	0.132929	0.188221	0.840217	0.0201092	FALSE	0.131062	0.183955	FALSE	0.0856858	0.204064	FALSE	FALSE	static	-0.286095	-0.269813	-0.00868436	-0.628854	-0.524267	1.15312	1.15312
chr1	43660001	43670000	-0.0336993	0.00046	-0.0582302	-0.0122844	-0.172836	-0.288423	-0.352972	0.00860678	-0.0842457	-0.137783	-0.0440561	0.108237	-0.142761	-0.0701561	-0.141987	-0.120877	-0.138869	-0.286688	-0.0956321	-0.122261	0.120146	0.0164129	0.162105	0.0822154	0.732784	0.0344687	FALSE	0.639672	0.0463823	FALSE	0.439161	0.080851	FALSE	FALSE	static	-0.139264	-0.0509598	0.0459796	-0.984105	-0.0310654	1.01517	1.01517
chr1	43770001	43780000	0.0302596	0.111527	0.0201612	-0.0314699	-0.138958	-0.188336	-0.240338	-0.030307	0.140651	0.027723	0.0619708	0.104552	0.266873	0.271729	0.0365816	-0.0960995	-0.0136655	-0.0456965	0.0415708	0.044046	0.110122	0.0584854	0.0984074	-0.135082	0.10096	0.16018	FALSE	0.293566	-0.0819742	FALSE	0.277656	0.0782062	FALSE	FALSE	static	-0.0434509	0.118669	0.058796	-1.07495	0.902656	0.172297	0.902656
chr1	43940001	43950000	-0.391847	-0.466733	-0.411995	-0.296175	-0.454541	-0.505741	-0.487571	-0.381135	-0.406424	-0.367176	-0.335659	-0.441245	-0.466704	-0.363678	-0.480216	-0.394668	-0.563492	-0.556897	-0.522192	-0.461141	-0.301065	-0.24956	-0.274799	-0.444736	0.740727	0.0174958	FALSE	0.862677	-0.0147639	FALSE	0.975253	0.00273189	FALSE	FALSE	static	-0.428757	-0.390603	-0.373349	-1.09995	0.245706	0.854245	0.854245
chr1	44040001	44050000	-0.0339289	-0.267314	-0.116115	-0.127432	0.0049777	-0.332984	-0.153114	0.0343612	0.061477	-0.139026	0.0395826	-0.079737	-0.0848333	-0.188084	-0.145258	-0.119305	-0.941528	-0.391638	-0.401166	-0.573721	-0.255381	-0.0969179	-0.162668	-0.195959	0.652047	0.0420456	FALSE	0.0736092	-0.295474	FALSE	0.105148	-0.253429	FALSE	FALSE	static	-0.12336	-0.0535649	-0.258832	0.209754	0.878486	-1.08824	0.878486
chr1	44050001	44060000	-0.173727	-0.33664	-0.250424	-0.293889	-0.113249	-0.425509	-0.206266	-0.0985362	-0.107865	-0.235226	-0.0542868	-0.206141	-0.153139	-0.289475	-0.246375	-0.239096	-1.03499	-0.46566	-0.577565	-0.667457	-0.420334	-0.231037	-0.367158	-0.336897	0.565696	0.0458296	FALSE	0.0413126	-0.321187	FALSE	0.06046	-0.275357	FALSE	FALSE	static	-0.239104	-0.166039	-0.405901	0.254129	0.848417	-1.10255	0.848417
chr1	44340001	44350000	-0.0416896	0.0342621	-0.271438	-0.19459	-0.122173	-0.099033	-0.0109952	-0.100331	0.0831494	0.0688925	-0.00953863	-0.0800216	0.0277799	0.090625	0.00473447	0.0165529	-0.140923	-0.101562	0.0155816	-0.102423	0.146918	0.186657	-0.0434504	0.0607858	0.0652129	0.12602	FALSE	0.776753	-0.0225737	FALSE	0.179173	0.103447	FALSE	FALSE	static	-0.0951497	0.0544111	0.0586012	-1.15437	0.553265	0.601106	0.601106
chr1	44600001	44610000	-0.220234	-0.167399	-0.362173	-0.284742	-0.0930026	-0.125971	-0.267985	-0.181908	-0.211214	-0.0730235	-0.0343145	-0.189393	-0.289119	-0.103571	-0.219798	-0.257542	-0.399931	-0.50208	-0.10155	-0.206982	-0.226252	-0.0582764	-0.0413421	-0.136855	0.582749	0.04068	FALSE	0.736128	-0.0369117	FALSE	0.973574	0.00376828	FALSE	FALSE	static	-0.216476	-0.147672	-0.158044	-1.14336	0.711478	0.431883	0.711478
chr1	44700001	44710000	-0.573041	-0.541953	-0.344009	-0.612117	-0.590698	-0.400897	-0.74941	-0.594096	-0.577854	-0.321436	-0.601102	-0.501272	-0.366826	-0.343685	-0.575609	-0.571823	-0.195821	-0.227415	-0.233274	-0.0222497	-0.344249	-0.172069	-0.10076	-0.229843	0.487954	0.0683267	FALSE	0.00241179	0.291741	TRUE	0.000768842	0.360067	TRUE	TRUE	up.late	-0.54772	-0.470973	-0.159401	-0.753803	-0.380618	1.13442	1.13442
chr1	44710001	44720000	-0.493544	-0.515363	-0.370227	-0.506934	-0.567532	-0.458416	-0.749573	-0.61192	-0.601893	-0.386175	-0.584569	-0.547328	-0.355485	-0.427497	-0.522249	-0.702888	-0.292433	-0.342432	-0.262089	-0.105665	-0.440514	-0.228791	-0.165096	-0.252741	0.8622	0.0181783	FALSE	0.00588005	0.25479	TRUE	0.00260582	0.272969	TRUE	TRUE	up.late	-0.534993	-0.504722	-0.217159	-0.661479	-0.488915	1.15039	1.15039
chr1	45010001	45020000	-0.92606	-0.839957	-0.737856	-0.688247	-1.00722	-0.769486	-0.99261	-0.78226	-0.598078	-0.581539	-0.539073	-0.517688	-0.558273	-0.511121	-0.748632	-0.505459	-0.722632	-0.518235	-0.652217	-0.426189	-0.490687	-0.433988	-0.396018	-0.651605	0.00705707	0.272979	TRUE	0.689068	0.0335363	FALSE	0.00260502	0.306515	TRUE	TRUE	up.early	-0.809656	-0.545179	-0.498634	-1.14353	0.433038	0.710497	0.710497
chr1	45020001	45030000	-0.792409	-0.759917	-0.586861	-0.669955	-0.924201	-0.617963	-0.847173	-0.667998	-0.580056	-0.501578	-0.496945	-0.43203	-0.539312	-0.490636	-0.693947	-0.503969	-0.686551	-0.428334	-0.537168	-0.497531	-0.420308	-0.39491	-0.374225	-0.642685	0.0236964	0.2035	FALSE	0.689068	0.032095	FALSE	0.00942968	0.235595	TRUE	TRUE	up.early	-0.699782	-0.499866	-0.464297	-1.14331	0.431556	0.711756	0.711756
chr1	45500001	45510000	-0.271441	-0.500461	-0.698131	-0.362037	-0.507451	-0.323935	-0.337565	-0.4441	-0.345283	-0.162651	-0.227788	-0.395038	-0.243805	-0.373699	-0.385948	-0.0733872	-0.510174	-0.392562	-0.316402	-0.410774	-0.206956	-0.286442	-0.149277	-0.212512	0.128135	0.15469	FALSE	0.72213	-0.0346875	FALSE	0.183881	0.120003	FALSE	FALSE	static	-0.424462	-0.259781	-0.248645	-1.15285	0.519868	0.632984	0.632984
chr1	45580001	45590000	-0.529094	-0.515467	-0.47288	-0.704645	-0.418096	-0.61311	-0.397731	-0.664921	-0.384427	-0.390889	-0.37519	-0.530264	-0.454844	-0.311274	-0.447887	-0.532826	-0.314855	-0.36082	-0.580531	-0.409264	-0.299575	-0.651762	-0.277871	-0.391314	0.150094	0.111043	FALSE	0.852893	0.0177011	FALSE	0.138767	0.128744	FALSE	FALSE	static	-0.52771	-0.40252	-0.345506	-1.09936	0.243824	0.85554	0.85554
chr1	45590001	45600000	-0.539068	-0.583145	-0.535603	-0.783281	-0.587251	-0.672385	-0.472315	-0.696201	-0.434822	-0.451669	-0.404935	-0.562178	-0.504042	-0.356744	-0.537035	-0.63757	-0.381664	-0.439858	-0.603322	-0.385147	-0.330147	-0.622157	-0.354376	-0.473597	0.111397	0.122532	FALSE	0.644997	0.0373408	FALSE	0.0377045	0.159873	FALSE	FALSE	static	-0.593902	-0.454068	-0.386896	-1.09475	0.229352	0.865399	0.865399
chr1	46020001	46030000	-0.362099	-0.153536	-0.227994	-0.210409	-0.463198	-0.215507	-0.124015	-0.339719	-0.177053	-0.216262	-0.350249	-0.233482	-0.209256	-0.146968	-0.201311	-0.327468	-0.274424	-0.49104	-0.284953	-0.150395	-0.403561	-0.417509	-0.307293	-0.0309574	0.723212	0.0293035	FALSE	0.49572	-0.0622603	FALSE	0.746331	-0.0329568	FALSE	FALSE	static	-0.24275	-0.201904	-0.251863	-0.397569	1.13764	-0.740074	1.13764
chr1	46030001	46040000	-0.310585	-0.118702	-0.153734	-0.164306	-0.432024	-0.129142	-0.163275	-0.253336	-0.106117	-0.135846	-0.301781	-0.144631	-0.119584	-0.181022	-0.136364	-0.233096	-0.311825	-0.458328	-0.27192	-0.124174	-0.389559	-0.371855	-0.237708	-0.0270649	0.533516	0.0458326	FALSE	0.214313	-0.104249	FALSE	0.522269	-0.0584164	FALSE	FALSE	static	-0.194445	-0.140154	-0.22004	-0.23448	1.09641	-0.861925	1.09641
chr1	46200001	46210000	-0.0122131	0.086224	0.0429237	0.131221	0.0445268	0.175814	0.078297	-0.0596723	0.0779636	0.104528	0.0791548	0.0714094	0.0803899	0.0133736	-0.00688877	0.0402482	0.0472232	-0.0145119	-0.0693785	-0.189418	0.0877607	-0.0246864	-0.0378009	0.181134	0.953404	-0.00336779	FALSE	0.344043	-0.0599821	FALSE	0.342454	-0.0633498	FALSE	FALSE	static	0.0485566	0.0752575	0.0348325	-0.210421	1.08847	-0.878045	1.08847
chr1	46240001	46250000	-0.248401	-0.466517	-0.396669	-0.242209	-0.261771	-0.621071	-0.277196	-0.266103	-0.328758	-0.230033	-0.360682	-0.466009	-0.413897	-0.369001	-0.224327	-0.484518	-0.429143	-0.323404	-0.124919	-0.497882	-0.212447	-0.17893	-0.21707	-0.198843	0.915143	-0.0121609	FALSE	0.310595	0.0868231	FALSE	0.432353	0.0746622	FALSE	FALSE	static	-0.341807	-0.335843	-0.230259	-0.624219	-0.529177	1.1534	1.1534
chr1	46350001	46360000	-0.108309	-0.176305	-0.102694	-0.275308	-0.177397	-0.0903705	-0.245666	-0.215609	0.0943158	0.0402964	-0.0317954	-0.157345	-0.091771	-0.218245	-0.185561	-0.139098	-0.0953238	-0.0806802	0.00653344	-0.496086	0.287279	0.0692606	0.0493193	0.0546597	0.232466	0.0878068	FALSE	0.671132	0.0605207	FALSE	0.218286	0.148328	FALSE	FALSE	static	-0.170318	-0.0761525	0.0638646	-0.92882	-0.129703	1.05852	1.05852
chr1	46360001	46370000	-0.263577	-0.263563	-0.258869	-0.360168	-0.274352	-0.202056	-0.349411	-0.237274	-0.0167449	-0.0535591	-0.154634	-0.283471	-0.182694	-0.32828	-0.255236	-0.204884	-0.145354	-0.180481	-0.114132	-0.52542	0.191493	0.0225471	0.00813138	-0.0686904	0.187405	0.091221	FALSE	0.520423	0.0834497	FALSE	0.124753	0.174671	FALSE	FALSE	static	-0.276422	-0.186272	-0.0191478	-0.887132	-0.19655	1.08368	1.08368
chr1	46370001	46380000	-0.368936	-0.313339	-0.401605	-0.395341	-0.321701	-0.301171	-0.400439	-0.244655	-0.171455	-0.155457	-0.237765	-0.370735	-0.235368	-0.372025	-0.336262	-0.250933	-0.147197	-0.238467	-0.154854	-0.49705	0.13191	-0.0553612	-0.010376	-0.171265	0.178997	0.0771484	FALSE	0.252575	0.123417	FALSE	0.0583922	0.200566	FALSE	FALSE	static	-0.34719	-0.275765	-0.0718969	-0.809005	-0.309033	1.11804	1.11804
chr1	46400001	46410000	-0.336446	-0.282107	-0.187623	-0.244874	-0.205195	-0.324061	-0.194427	-0.0711435	-0.240279	-0.185714	-0.209167	-0.338279	-0.252598	-0.302806	-0.301147	-0.3153	-0.0777962	-0.176842	-0.134402	-0.19837	-0.127154	-0.180246	-0.113151	-0.168731	0.522673	-0.0374269	FALSE	0.00388001	0.121075	TRUE	0.0903887	0.083648	FALSE	TRUE	up.late	-0.241755	-0.270521	-0.132535	-0.368397	-0.763542	1.13194	1.13194
chr1	46720001	46730000	-0.680847	-0.572379	-0.714535	-0.567884	-0.59094	-0.693527	-0.725899	-0.616781	-0.430554	-0.634012	-0.501184	-0.447143	-0.581545	-0.747786	-0.421107	-0.627428	-0.441141	-0.448393	-0.55131	-0.394698	-0.463858	-0.423746	-0.491853	-0.384885	0.205399	0.0965043	FALSE	0.155647	0.0988592	FALSE	0.000609556	0.195363	TRUE	TRUE	up.early	-0.621661	-0.511223	-0.432028	-1.05018	0.109338	0.940838	0.940838
chr1	46730001	46740000	-0.697811	-0.568951	-0.799339	-0.613153	-0.65872	-0.604242	-0.781839	-0.556792	-0.438031	-0.654913	-0.495907	-0.470666	-0.565524	-0.738333	-0.402232	-0.639111	-0.467586	-0.491681	-0.571642	-0.462126	-0.479282	-0.479296	-0.514628	-0.380487	0.190546	0.109516	FALSE	0.316453	0.0697482	FALSE	0.00560834	0.179264	TRUE	TRUE	up.early	-0.640156	-0.515647	-0.459671	-1.10044	0.247273	0.853165	0.853165
chr1	47060001	47070000	-0.185656	-0.0779806	0.186013	-0.162721	0.237057	-0.339782	0.184124	0.211999	-0.0909912	-0.19674	-0.28959	-0.217997	-0.0699141	-0.233609	0.286417	-0.517009	-0.348867	-0.394698	-0.470705	0.0973432	0.0533719	0.084167	-0.177892	-0.108178	0.327818	-0.172811	FALSE	0.970038	0.00799668	FALSE	0.295571	-0.164814	FALSE	FALSE	static	-0.0247255	-0.150989	-0.153565	1.15452	-0.55978	-0.594744	1.15452
chr1	47070001	47080000	-0.419721	-0.287937	-0.0172736	-0.330811	0.0938821	-0.401052	-0.0922254	0.218362	-0.308437	-0.395327	-0.347506	-0.398701	-0.146147	-0.542439	-0.00872977	-0.800487	-0.486748	-0.601885	-0.802245	-0.0323205	-0.0648232	-0.101657	-0.234367	-0.371594	0.2525	-0.213874	FALSE	0.889651	0.0315166	FALSE	0.316497	-0.182358	FALSE	FALSE	static	-0.195284	-0.338629	-0.300215	1.11534	-0.816525	-0.29882	1.11534
chr1	47180001	47190000	-0.736104	-0.564934	-0.482383	-0.667834	-0.407457	-0.595067	-0.416945	-0.395122	-0.36612	-0.352913	-0.531645	-0.454596	-0.497431	-0.468122	-0.341804	-0.413268	-0.304364	-0.641299	-0.230667	-0.47803	-0.465489	-0.605239	-0.26222	-0.314734	0.205375	0.104994	FALSE	0.88489	0.0154821	FALSE	0.228926	0.120476	FALSE	FALSE	static	-0.54083	-0.438771	-0.368458	-1.05544	0.122092	0.933348	0.933348
chr1	47380001	47390000	-0.109665	0.0156134	-0.0779027	-0.173573	-0.365117	-0.120733	-0.12213	-0.0297101	-0.128907	-0.213082	0.0292359	0.0801103	-0.159973	-0.0130425	-0.154748	-0.294965	-0.0441748	-0.209285	-0.0704589	-0.14085	-0.318129	-0.182317	-0.16006	-0.208605	0.888826	0.0159806	FALSE	0.475269	-0.0598134	FALSE	0.547228	-0.0438328	FALSE	FALSE	static	-0.107676	-0.0379344	-0.157309	-0.111772	1.05119	-0.939418	1.05119
chr1	47390001	47400000	-0.0866736	-0.00267925	-0.0328834	-0.120173	-0.316599	-0.151047	-0.0870319	-0.0339937	-0.117957	-0.335654	0.0726924	0.059222	-0.188096	-0.064917	-0.169195	-0.268787	-0.0710628	-0.262984	-0.0276736	-0.148882	-0.300823	-0.224272	-0.175934	-0.286974	0.840521	-0.0227011	FALSE	0.532827	-0.0607394	FALSE	0.228723	-0.0834405	FALSE	FALSE	static	-0.0904286	-0.0422629	-0.18311	0.207282	0.880115	-1.0874	0.880115
chr1	47720001	47730000	-0.923719	-0.774638	-0.763449	-0.854678	-0.681783	-0.559662	-0.372122	-0.512621	-0.910847	-0.758809	-0.999227	-0.724485	-0.638714	-0.807018	-0.679988	-0.541234	-0.574362	-0.442421	-0.665428	-0.480557	-0.613742	-0.696659	-0.494468	-0.727581	0.575091	-0.0772061	FALSE	0.0763902	0.170638	FALSE	0.388272	0.0934318	FALSE	FALSE	static	-0.676706	-0.732291	-0.592635	-0.135047	-0.925614	1.06066	1.06066
chr1	47730001	47740000	-0.840247	-0.728117	-0.703972	-0.817683	-0.6414	-0.516224	-0.416288	-0.517635	-0.857648	-0.710188	-0.985068	-0.655222	-0.562213	-0.705779	-0.616702	-0.516732	-0.538872	-0.470509	-0.674337	-0.520365	-0.593952	-0.670917	-0.472506	-0.644007	0.681759	-0.0534981	FALSE	0.170274	0.12801	FALSE	0.39802	0.0745123	FALSE	FALSE	static	-0.643829	-0.67682	-0.575592	-0.227579	-0.866596	1.09418	1.09418
chr1	47940001	47950000	-0.177375	-0.380998	-0.148753	-0.136699	-0.190077	-0.187913	-0.160577	-0.123018	-0.201682	-0.271379	-0.303915	-0.39156	-0.256126	-0.172352	-0.549668	-0.19763	-0.0814855	-0.0454989	-0.0839571	0.035173	-0.0984155	-0.194632	-0.151991	-0.110492	0.209845	-0.104863	FALSE	0.016756	0.201627	FALSE	0.0702115	0.0967637	FALSE	FALSE	static	-0.16168	-0.316222	-0.0919228	0.246206	-1.10011	0.853901	0.853901
chr1	48070001	48080000	-0.434833	-0.325861	-0.484425	-0.475216	-0.256619	-0.382949	-0.46043	-0.592137	-0.568227	-0.299624	-0.369596	-0.306785	-0.374851	-0.462406	-0.434377	-0.358794	-0.28551	-0.200719	-0.231498	-0.342787	-0.203664	-0.449931	-0.313055	-0.25609	0.720563	0.0297264	FALSE	0.0801674	0.111426	FALSE	0.0390788	0.141152	FALSE	FALSE	static	-0.473343	-0.331425	-0.282512	-1.119	0.312763	0.806237	0.806237
chr1	48230001	48240000	-0.514444	-0.503906	-0.40927	-0.443027	-0.410003	-0.379952	-0.267772	-0.386568	-0.413272	-0.391943	-0.378697	-0.576004	-0.415517	-0.386693	-0.323651	-0.638905	-0.330944	-0.315892	-0.662894	-0.291068	-0.183375	-0.475262	-0.238876	-0.27727	0.74978	-0.0262173	FALSE	0.343178	0.0936375	FALSE	0.439925	0.0674201	FALSE	FALSE	static	-0.418865	-0.416107	-0.334534	-0.605892	-0.54833	1.15422	1.15422
chr1	48240001	48250000	-0.49635	-0.552701	-0.455995	-0.41121	-0.371445	-0.352899	-0.193823	-0.402964	-0.435068	-0.38702	-0.420186	-0.618188	-0.456031	-0.37014	-0.269157	-0.608318	-0.325522	-0.249521	-0.609507	-0.289415	-0.16403	-0.467706	-0.229545	-0.260491	0.669481	-0.0408402	FALSE	0.211239	0.121046	FALSE	0.374671	0.0802061	FALSE	FALSE	static	-0.411908	-0.426842	-0.311666	-0.45402	-0.692446	1.14647	1.14647
chr1	48250001	48260000	-0.467962	-0.562452	-0.457774	-0.370578	-0.33876	-0.381764	-0.16234	-0.335617	-0.437515	-0.387714	-0.41415	-0.617	-0.437627	-0.387294	-0.23874	-0.522133	-0.244562	-0.155526	-0.645693	-0.295827	-0.106472	-0.486999	-0.216548	-0.244585	0.632872	-0.0456157	FALSE	0.23679	0.130745	FALSE	0.432879	0.0851296	FALSE	FALSE	static	-0.392624	-0.416025	-0.283003	-0.4047	-0.73422	1.13892	1.13892
chr1	48530001	48540000	-0.587296	-0.628994	-0.543865	-0.498334	-0.424969	-0.344703	-0.472021	-0.602234	-0.605633	-0.604565	-0.673571	-0.516662	-0.908658	-0.532527	-0.619999	-0.674512	-0.439558	-0.210152	-0.346496	-0.36531	-0.472642	-0.539899	-0.640964	-0.531834	0.139475	-0.129214	FALSE	0.0407195	0.198659	FALSE	0.404136	0.069445	FALSE	FALSE	static	-0.490312	-0.667283	-0.553029	0.890434	-1.08188	0.191451	0.890434
chr1	48540001	48550000	-0.572132	-0.576845	-0.505233	-0.41678	-0.358839	-0.335485	-0.401936	-0.589324	-0.555182	-0.602815	-0.62104	-0.471585	-0.920161	-0.527058	-0.57809	-0.611797	-0.354506	-0.164979	-0.301622	-0.280702	-0.408706	-0.583363	-0.536697	-0.47465	0.138419	-0.141394	FALSE	0.0333182	0.222813	FALSE	0.349146	0.0814184	FALSE	FALSE	static	-0.440413	-0.651807	-0.462004	0.66767	-1.14972	0.482047	0.66767
chr1	48550001	48560000	-0.533593	-0.50929	-0.434125	-0.309884	-0.294051	-0.271712	-0.318509	-0.552771	-0.458642	-0.550977	-0.503895	-0.387439	-0.839585	-0.551526	-0.513914	-0.510328	-0.22277	-0.128853	-0.228842	-0.218954	-0.327896	-0.554276	-0.450446	-0.393217	0.165519	-0.136546	FALSE	0.0326739	0.223881	FALSE	0.340626	0.0873351	FALSE	FALSE	static	-0.36583	-0.590443	-0.363046	0.566648	-1.15463	0.587987	0.587987
chr1	49080001	49090000	-0.205065	-0.0638886	-0.139328	-0.0712756	0.149	0.0263142	-0.0838974	0.255889	-0.0223225	-0.12177	-0.150953	-0.121669	-0.107478	0.0451616	-0.0720653	0.0885373	-0.182168	-0.20351	-0.0667672	-0.166227	-0.167179	-0.164268	-0.340102	-0.273901	0.698274	-0.0412883	FALSE	0.0320595	-0.137695	FALSE	0.0503296	-0.178984	FALSE	FALSE	static	-0.00736607	-0.0337777	-0.376492	0.640294	0.512029	-1.15232	0.640294
chr1	50300001	50310000	-0.360896	-0.455528	-0.278119	-0.403051	-0.323629	-0.196269	-0.260854	-0.181266	-0.330299	-0.365326	-0.4568	-0.345538	-0.544182	-0.43654	-0.453949	-0.288895	-0.0731556	-0.133574	-0.263167	-0.341977	-0.12223	-0.108204	-0.135638	-0.0682428	0.181017	-0.0952396	FALSE	0.00213191	0.246917	TRUE	0.0309578	0.151678	FALSE	TRUE	up.late	-0.312261	-0.371724	-0.161346	-0.281085	-0.829377	1.11046	1.11046
chr1	50350001	50360000	-0.916227	-0.820136	-0.853512	-1.06014	-0.688129	-0.550945	-0.764483	-0.628523	-0.636712	-0.616637	-0.545801	-0.709582	-0.741995	-0.60635	-0.461118	-0.796032	-0.677861	-0.678455	-0.620858	-0.661804	-0.889895	-0.687062	-0.681535	-0.724996	0.185997	0.145983	FALSE	0.375346	-0.0635298	FALSE	0.373023	0.0824535	FALSE	FALSE	static	-0.833214	-0.610443	-0.706977	-1.04136	0.952738	0.0886254	0.952738
chr1	50360001	50370000	-0.849205	-0.723095	-0.758888	-1.0466	-0.6478	-0.521651	-0.698213	-0.545566	-0.609229	-0.548241	-0.507485	-0.681736	-0.670462	-0.55324	-0.442655	-0.816036	-0.60633	-0.689443	-0.517356	-0.651702	-0.787085	-0.573465	-0.626724	-0.677065	0.293458	0.120242	FALSE	0.641491	-0.0375109	FALSE	0.384722	0.0827312	FALSE	FALSE	static	-0.780824	-0.573878	-0.641428	-1.09397	0.867029	0.226937	0.867029
chr1	50600001	50610000	-0.247135	-0.103853	-0.319076	-0.187226	-0.282287	-0.345774	-0.362769	-0.339473	-0.195326	-0.0639973	-0.167677	-0.265333	-0.257619	-0.201645	-0.321994	-0.150236	-0.369393	-0.191118	-0.463806	-0.329001	-0.439037	-0.395803	-0.424277	-0.510402	0.28797	0.0704704	FALSE	0.00991957	-0.187376	TRUE	0.0774705	-0.116906	FALSE	TRUE	down.late	-0.223837	-0.163304	-0.395418	0.307435	0.810188	-1.11762	0.810188
chr1	50740001	50750000	-0.591511	-0.540365	-0.579385	-0.586864	-0.665243	-0.74397	-0.673749	-0.47875	-0.594799	-0.500986	-0.38241	-0.560265	-0.673213	-0.504274	-0.465708	-0.682854	-0.347519	-0.338542	-0.476343	-0.49421	-0.391076	-0.415571	-0.574466	-0.51461	0.403533	0.0619159	FALSE	0.142954	0.101522	FALSE	0.0112756	0.163437	FALSE	FALSE	static	-0.563291	-0.513336	-0.420123	-0.885908	-0.198432	1.08434	1.08434
chr1	50750001	50760000	-0.546509	-0.486963	-0.563949	-0.547296	-0.653016	-0.766706	-0.682632	-0.455687	-0.538834	-0.495148	-0.333331	-0.53101	-0.62355	-0.554101	-0.397723	-0.586333	-0.367563	-0.326974	-0.478049	-0.456989	-0.402262	-0.364745	-0.545597	-0.524493	0.307904	0.0803411	FALSE	0.256057	0.0741697	FALSE	0.0257178	0.154511	FALSE	FALSE	static	-0.537819	-0.476643	-0.405959	-0.975119	-0.0480301	1.02315	1.02315
chr1	50930001	50940000	-0.165979	0.0530623	-0.0624573	-0.122725	0.000380291	0.0155534	-0.0789778	-0.0690513	-0.0806544	-0.015783	0.0015326	-0.106292	0.0457683	-0.0252591	0.0228887	0.0492194	0.00901107	-0.00575393	0.149433	0.121609	0.114129	0.095555	-0.0497055	-0.0843448	0.440836	0.0402019	FALSE	0.295448	0.057314	FALSE	0.085928	0.0975159	FALSE	FALSE	static	-0.0252272	-0.00457355	0.0661721	-0.779236	-0.348348	1.12758	1.12758
chr1	51190001	51200000	-0.45344	-0.472109	-0.341663	-0.547288	-0.34282	-0.564787	-0.382836	-0.457798	-0.305715	-0.451441	-0.445936	-0.403705	-0.394959	-0.534776	-0.353791	-0.451094	-0.511807	-0.443166	-0.33223	-0.336855	-0.456435	-0.558135	-0.354324	-0.463002	0.675887	0.0276655	FALSE	0.826431	-0.0143174	FALSE	0.840336	0.0133481	FALSE	FALSE	static	-0.4349	-0.385869	-0.43454	-0.583715	1.15468	-0.570962	1.15468
chr1	51200001	51210000	-0.384958	-0.432579	-0.337269	-0.506794	-0.364337	-0.454292	-0.306529	-0.434769	-0.329486	-0.421175	-0.446784	-0.364581	-0.439941	-0.4623	-0.329094	-0.482652	-0.420733	-0.393333	-0.30992	-0.257587	-0.403442	-0.505048	-0.245097	-0.410456	0.911295	-0.00681079	FALSE	0.481721	0.0412994	FALSE	0.543041	0.0344887	FALSE	FALSE	static	-0.393666	-0.377132	-0.367861	-1.07966	0.185211	0.894447	0.894447
chr1	51310001	51320000	-0.30787	-0.363933	-0.322437	-0.506226	-0.354888	-0.419552	-0.187876	-0.118466	-0.265507	-0.344004	-0.716818	-0.452215	-0.322055	-0.360362	-0.396405	-0.330239	-0.418338	-0.215827	-0.273998	-0.605347	-0.397659	-0.239102	-0.281225	-0.346479	0.470984	-0.0757949	FALSE	0.627957	0.0512039	FALSE	0.799168	-0.024591	FALSE	FALSE	static	-0.310193	-0.530459	-0.327312	0.645796	-1.15188	0.506083	0.645796
chr1	51540001	51550000	-0.0230779	-0.0673325	0.0465252	0.0730051	-0.0255962	0.0448009	0.187144	-0.128013	0.00346259	0.0709327	-0.0384103	0.0264812	-0.0947529	0.00175618	-0.0418491	-0.260381	-0.0815834	-0.161655	-0.0372283	-0.0500265	-0.0655965	0.0301528	-0.100626	0.000783923	0.487957	-0.0550271	FALSE	0.812692	-0.0166272	FALSE	0.204838	-0.0716542	FALSE	FALSE	static	0.0286744	0.00837981	-0.0410903	0.836562	0.271011	-1.10757	0.836562
chr1	51770001	51780000	-0.29512	-0.183651	-0.200952	-0.204393	-0.343969	-0.360912	-0.37167	-0.194519	-0.225165	-0.321391	-0.156734	-0.158173	-0.234791	-0.2309	-0.162812	-0.212668	-0.309704	-0.245265	-0.306359	-0.196347	-0.164599	-0.337023	-0.314493	-0.237093	0.303262	0.0565691	FALSE	0.237523	-0.051031	FALSE	0.926781	0.00553807	FALSE	FALSE	static	-0.237183	-0.196453	-0.219547	-0.952486	1.04156	-0.089069	1.04156
chr1	51780001	51790000	-0.273522	-0.25863	-0.261818	-0.254496	-0.347579	-0.34434	-0.350943	-0.208491	-0.267202	-0.356805	-0.205324	-0.237055	-0.243735	-0.226513	-0.186176	-0.173345	-0.224238	-0.302598	-0.301827	-0.211376	-0.202505	-0.379965	-0.32529	-0.228877	0.243241	0.0504579	FALSE	0.44832	-0.0350653	FALSE	0.730653	0.0153927	FALSE	FALSE	static	-0.262113	-0.228619	-0.237369	-1.11748	0.81059	0.30689	0.81059
chr1	51790001	51800000	-0.229966	-0.253778	-0.250671	-0.216183	-0.302798	-0.30897	-0.239911	-0.198052	-0.215157	-0.320289	-0.162054	-0.217936	-0.185211	-0.120788	-0.142404	-0.109189	-0.118931	-0.334065	-0.260199	-0.191647	-0.235451	-0.353564	-0.278275	-0.224413	0.143345	0.0659126	FALSE	0.213643	-0.0654396	FALSE	0.992866	0.00047296	FALSE	FALSE	static	-0.229636	-0.180494	-0.22578	-0.646464	1.15182	-0.505359	1.15182
chr1	52000001	52010000	-0.494159	-0.126168	-0.286139	-0.372273	-0.306661	-0.0268462	-0.263546	-0.287102	-0.227653	-0.338278	-0.136103	-0.257038	-0.206366	-0.0576423	-0.23896	-0.310438	-0.371946	-0.432999	-0.315456	-0.416615	-0.320174	-0.346732	-0.35009	-0.388134	0.626569	0.0488021	FALSE	0.0163605	-0.146209	FALSE	0.205334	-0.0974065	FALSE	FALSE	static	-0.249727	-0.211509	-0.353215	0.296752	0.818037	-1.11479	0.818037
chr1	52010001	52020000	-0.618032	-0.222306	-0.425526	-0.516622	-0.439978	-0.196454	-0.466791	-0.431712	-0.370061	-0.442875	-0.270981	-0.334921	-0.349414	-0.155867	-0.297866	-0.418248	-0.491822	-0.5166	-0.410631	-0.380033	-0.443065	-0.452611	-0.4165	-0.486157	0.367274	0.0846486	FALSE	0.0379797	-0.119648	FALSE	0.659249	-0.0349994	FALSE	FALSE	static	-0.390775	-0.32189	-0.437703	-0.125645	1.05688	-0.93124	1.05688
chr1	52030001	52040000	-0.896752	-0.259498	-0.489672	-0.521314	-0.47722	-0.399037	-0.624363	-0.400132	-0.430162	-0.38159	-0.272995	-0.262482	-0.360373	-0.271613	-0.293188	-0.328679	-0.442963	-0.470015	-0.437832	-0.288473	-0.431278	-0.469	-0.408942	-0.463077	0.126649	0.183363	FALSE	0.0280614	-0.101312	FALSE	0.422504	0.0820511	FALSE	FALSE	static	-0.485566	-0.316301	-0.419674	-0.918709	1.06514	-0.146434	1.06514
chr1	52040001	52050000	-0.923461	-0.267556	-0.439423	-0.424386	-0.381132	-0.435594	-0.59929	-0.346543	-0.419535	-0.288086	-0.222825	-0.255969	-0.374365	-0.228131	-0.335123	-0.307105	-0.414709	-0.363583	-0.384673	-0.232442	-0.414662	-0.425721	-0.391049	-0.394007	0.171789	0.173281	FALSE	0.128725	-0.0737131	FALSE	0.362548	0.0995674	FALSE	FALSE	static	-0.461194	-0.289934	-0.37255	-1.01152	0.988065	0.0234565	0.988065
chr1	52050001	52060000	-0.808025	-0.260051	-0.440784	-0.334944	-0.269222	-0.444145	-0.481743	-0.262106	-0.406958	-0.204654	-0.237152	-0.201425	-0.318642	-0.190756	-0.287441	-0.265362	-0.385563	-0.303098	-0.275204	-0.174207	-0.352551	-0.422776	-0.364748	-0.325001	0.194441	0.148579	FALSE	0.265094	-0.0613449	FALSE	0.38917	0.0872339	FALSE	FALSE	static	-0.407427	-0.249372	-0.319747	-1.03443	0.961586	0.072844	0.961586
chr1	52060001	52070000	-0.797904	-0.245581	-0.393184	-0.292808	-0.188845	-0.427748	-0.365732	-0.20996	-0.383586	-0.173329	-0.24734	-0.168405	-0.331168	-0.144197	-0.234054	-0.243591	-0.340541	-0.327697	-0.210762	-0.206078	-0.243655	-0.38472	-0.307466	-0.25849	0.301898	0.124512	FALSE	0.432163	-0.0442175	FALSE	0.447961	0.0802942	FALSE	FALSE	static	-0.362912	-0.223277	-0.269865	-1.09096	0.873131	0.217829	0.873131
chr1	52300001	52310000	0.0444611	-0.00445624	0.00331947	0.0111419	-0.0493691	-0.0755952	-0.267586	-0.122351	-0.229316	0.0487821	0.0956044	0.0732351	-0.0233559	0.0468537	-0.204746	-0.128924	-0.151349	-0.302811	-0.025038	-0.0594566	-0.268269	-0.190823	-0.136668	-0.13239	0.87068	0.017321	FALSE	0.158451	-0.118117	FALSE	0.137586	-0.100796	FALSE	FALSE	static	-0.0146616	-0.00216353	-0.146469	0.497423	0.653745	-1.15117	0.653745
chr1	52350001	52360000	-0.348572	-0.343647	-0.510383	-0.370036	-0.478418	-0.387175	-0.447674	-0.334788	-0.518011	-0.310169	-0.279833	-0.564964	-0.47091	-0.222446	-0.307862	-0.279637	-0.530083	-0.26523	-0.335547	-0.351552	-0.260521	-0.506702	-0.369105	-0.403831	0.705609	0.0333578	FALSE	0.931757	-0.00859254	FALSE	0.69742	0.0247653	FALSE	FALSE	static	-0.390646	-0.351329	-0.380062	-0.817598	1.11495	-0.297353	1.11495
chr1	52360001	52370000	-0.369876	-0.514801	-0.554891	-0.468093	-0.458635	-0.314596	-0.448916	-0.431361	-0.486374	-0.296998	-0.359467	-0.642543	-0.486058	-0.217673	-0.308337	-0.356228	-0.496493	-0.207208	-0.31067	-0.374999	-0.24918	-0.50984	-0.362586	-0.419088	0.575243	0.0509364	FALSE	0.786319	0.0279516	FALSE	0.230057	0.0788881	FALSE	FALSE	static	-0.439403	-0.369552	-0.373249	-1.15342	0.623733	0.52969	0.623733
chr1	52690001	52700000	-0.671459	-0.590747	-0.75567	-0.920817	-0.611896	-0.890756	-0.870312	-0.467655	-0.77796	-0.655696	-0.592975	-0.680163	-0.574301	-0.474098	-0.484789	-0.741294	-0.582206	-0.620252	-0.627682	-0.627197	-0.71807	-0.677769	-0.636844	-0.548428	0.366507	0.0997548	FALSE	0.925269	-0.0071466	FALSE	0.292948	0.0926082	FALSE	FALSE	static	-0.694406	-0.603672	-0.619985	-1.13816	0.737715	0.400449	0.737715
chr1	52700001	52710000	-0.582637	-0.487026	-0.65036	-0.743858	-0.429035	-0.778632	-0.6461	-0.372339	-0.665521	-0.611042	-0.530195	-0.556217	-0.433187	-0.361432	-0.489487	-0.623313	-0.460058	-0.587556	-0.506651	-0.510118	-0.635426	-0.603831	-0.565326	-0.493037	0.619388	0.0524492	FALSE	0.87609	-0.011451	FALSE	0.623118	0.0409982	FALSE	FALSE	static	-0.579734	-0.522094	-0.538137	-1.11193	0.825613	0.286316	0.825613
chr1	53220001	53230000	-0.53328	-0.623857	-0.83224	-0.65392	-0.783252	-0.504257	-0.544953	-0.467285	-0.425088	-0.609667	-0.601446	-0.578717	-0.665241	-0.556192	-0.455799	-0.510594	-0.406359	-0.557823	-0.254786	-0.629641	-0.380186	-0.424636	-0.661387	-0.435562	0.444484	0.0675373	FALSE	0.333976	0.0815456	FALSE	0.112663	0.149083	FALSE	FALSE	static	-0.614445	-0.528498	-0.43982	-0.994746	-0.0104269	1.00517	1.00517
chr1	53230001	53240000	-0.540045	-0.600895	-0.80705	-0.614746	-0.713833	-0.48421	-0.514361	-0.538834	-0.354729	-0.504054	-0.541933	-0.507169	-0.644583	-0.481605	-0.431668	-0.542146	-0.331437	-0.518047	-0.217687	-0.516739	-0.341437	-0.42528	-0.618369	-0.368937	0.191743	0.100761	FALSE	0.30174	0.0837442	FALSE	0.0339791	0.184505	FALSE	FALSE	static	-0.595673	-0.473853	-0.395888	-1.06465	0.145179	0.919475	0.919475
chr1	53240001	53250000	-0.521403	-0.607428	-0.749382	-0.540817	-0.636929	-0.433241	-0.455845	-0.540925	-0.296105	-0.448219	-0.46745	-0.421563	-0.513016	-0.343461	-0.428518	-0.471115	-0.342829	-0.485632	-0.248721	-0.419192	-0.329215	-0.434101	-0.56968	-0.331178	0.0623193	0.137065	FALSE	0.687764	0.0286123	FALSE	0.0270468	0.165678	FALSE	FALSE	static	-0.55534	-0.400238	-0.37737	-1.14662	0.455228	0.691394	0.691394
chr1	53250001	53260000	-0.479204	-0.494199	-0.602421	-0.468983	-0.476514	-0.336055	-0.373256	-0.535183	-0.213283	-0.354794	-0.369608	-0.314919	-0.398597	-0.165284	-0.369724	-0.349569	-0.300494	-0.459056	-0.259282	-0.323406	-0.314684	-0.382257	-0.52735	-0.310356	0.0320994	0.153755	FALSE	0.528275	-0.0426384	FALSE	0.0725942	0.111116	FALSE	FALSE	static	-0.465713	-0.29881	-0.342117	-1.11803	0.809026	0.309004	0.809026
chr1	53260001	53270000	-0.385251	-0.372605	-0.411774	-0.318518	-0.246936	-0.22786	-0.274596	-0.469183	-0.0909058	-0.246361	-0.197335	-0.209254	-0.281812	-0.0756931	-0.295795	-0.226822	-0.309839	-0.388397	-0.232894	-0.177365	-0.217531	-0.293169	-0.373159	-0.27208	0.0496373	0.135343	FALSE	0.158566	-0.0800568	FALSE	0.322324	0.0552863	FALSE	FALSE	static	-0.330263	-0.181662	-0.266784	-0.948105	1.04486	-0.096756	1.04486
chr1	53420001	53430000	-0.360933	-0.102178	-0.19406	-0.141265	-0.245993	-0.338636	-0.226784	-0.159544	-0.136146	-0.391362	0.0544646	-0.0248136	-0.126048	-0.143113	-0.0625656	-0.159991	-0.484062	-0.447933	-0.280107	-0.326166	-0.31614	-0.388276	-0.168852	-0.274871	0.270641	0.0974775	FALSE	0.0209001	-0.212104	FALSE	0.0916526	-0.114627	FALSE	FALSE	static	-0.281199	-0.150141	-0.311451	-0.391885	1.13659	-0.744706	1.13659
chr1	53430001	53440000	-0.325236	-0.107021	-0.229709	-0.145408	-0.238224	-0.405879	-0.226299	-0.0791588	-0.11699	-0.404148	0.0750514	-0.0492883	-0.183295	-0.157507	-0.0973102	-0.135261	-0.422677	-0.473	-0.253915	-0.302892	-0.294901	-0.372713	-0.169231	-0.272029	0.374415	0.0860232	FALSE	0.0397613	-0.186576	FALSE	0.164904	-0.100553	FALSE	FALSE	static	-0.290409	-0.162296	-0.296243	-0.538393	1.15384	-0.61545	1.15384
chr1	53770001	53780000	-0.360649	-0.0900953	-0.193521	-0.30484	-0.236221	-0.296643	-0.161444	0.0354913	-0.184694	-0.157413	-0.0632013	-0.115326	-0.141681	-0.0576472	-0.20441	-0.00984089	-0.158633	-0.331363	-0.241509	-0.097716	-0.0662097	-0.0880614	-0.125538	-0.159646	0.304683	0.0842135	FALSE	0.492091	-0.0418079	FALSE	0.600035	0.0424057	FALSE	FALSE	static	-0.180469	-0.103012	-0.124897	-1.1105	0.829289	0.281208	0.829289
chr1	53830001	53840000	-0.567118	-0.3963	-0.464766	-0.604553	-0.621218	-0.306844	-0.755381	-0.42635	-0.319531	-0.512895	-0.235916	-0.3589	-0.38172	-0.595972	-0.392804	-0.372104	-0.341147	-0.227305	-0.455331	-0.386966	-0.352327	-0.318886	-0.410589	-0.39124	0.231968	0.121586	FALSE	0.627794	0.0357562	FALSE	0.0634369	0.157342	FALSE	FALSE	static	-0.495718	-0.361977	-0.326	-1.1311	0.364398	0.766701	0.766701
chr1	53850001	53860000	-0.532358	-0.402097	-0.461856	-0.482296	-0.621589	-0.37317	-0.563436	-0.537046	-0.337637	-0.523392	-0.278995	-0.328043	-0.322532	-0.545533	-0.357238	-0.247975	-0.476966	-0.254612	-0.370784	-0.398143	-0.330312	-0.317125	-0.480993	-0.396973	0.0989684	0.129063	FALSE	0.898332	-0.0105702	FALSE	0.0413559	0.118493	FALSE	FALSE	static	-0.474498	-0.344297	-0.367185	-1.13894	0.734107	0.404837	0.734107
chr1	54050001	54060000	-0.48124	-0.462248	-0.299497	-0.24249	-0.426955	-0.29839	-0.500421	-0.396288	-0.331062	-0.444011	-0.279755	-0.361645	-0.26613	-0.270569	-0.284316	-0.458704	-0.114084	-0.198629	-0.0818557	-0.0191459	-0.200739	-0.165069	-0.208936	-0.305507	0.463738	0.051417	FALSE	0.00943677	0.175278	TRUE	0.00321471	0.226695	TRUE	TRUE	up.late	-0.365684	-0.334566	-0.159425	-0.711593	-0.431748	1.14334	1.14334
chr1	54060001	54070000	-0.46552	-0.463519	-0.355191	-0.28315	-0.498284	-0.311945	-0.535604	-0.473537	-0.390277	-0.515781	-0.340631	-0.41533	-0.296894	-0.364776	-0.294322	-0.589277	-0.286295	-0.274418	-0.221134	-0.106494	-0.269352	-0.29583	-0.272589	-0.392615	0.800005	0.0224325	FALSE	0.0524348	0.13607	FALSE	0.0159636	0.158503	FALSE	FALSE	static	-0.397733	-0.403252	-0.258221	-0.543449	-0.6106	1.15405	1.15405
chr1	54490001	54500000	-0.771506	-0.590468	-0.481132	-0.581305	-0.570049	-0.411629	-0.696395	-0.521121	-0.4548	-0.595113	-0.445121	-0.629285	-0.497428	-0.474416	-0.546156	-0.484016	-0.483675	-0.525228	-0.468077	-0.66294	-0.494715	-0.53579	-0.452853	-0.446231	0.407796	0.0621588	FALSE	0.906768	0.00710329	FALSE	0.30181	0.0692621	FALSE	FALSE	static	-0.570364	-0.502067	-0.495751	-1.15133	0.49934	0.651992	0.651992
chr1	54830001	54840000	-0.331161	-0.621144	-0.49913	-0.59363	-0.496208	-0.37955	-0.490006	-0.365065	-0.40572	-0.44738	-0.356524	-0.329189	-0.320492	-0.847117	-0.572267	-0.438835	-0.300839	-0.451025	-0.488182	-0.346839	-0.465028	-0.333125	-0.403661	-0.338389	0.95755	0.00729618	FALSE	0.477265	0.0738045	FALSE	0.199515	0.0811007	FALSE	FALSE	static	-0.466419	-0.613277	-0.376878	0.160079	-1.07038	0.910304	0.910304
chr1	55030001	55040000	-0.398945	-0.314014	-0.410632	-0.417548	-0.20495	-0.392422	-0.409805	-0.29287	-0.42639	-0.229045	-0.410521	-0.378618	-0.285787	-0.421241	-0.660608	-0.371782	-0.383494	-0.300396	-0.479514	-0.479167	-0.498908	-0.403072	-0.451249	-0.391695	0.626574	-0.0428508	FALSE	0.763737	-0.0254379	FALSE	0.171934	-0.0682887	FALSE	FALSE	static	-0.359043	-0.357133	-0.425542	0.552651	0.601702	-1.15435	0.601702
chr1	55040001	55050000	-0.481989	-0.412587	-0.496193	-0.513226	-0.268083	-0.463616	-0.462094	-0.363836	-0.440793	-0.340938	-0.499279	-0.410609	-0.388106	-0.643866	-0.666375	-0.487499	-0.428429	-0.286661	-0.441941	-0.498657	-0.534453	-0.422029	-0.437674	-0.383469	0.525803	-0.0519803	FALSE	0.459798	0.055519	FALSE	0.956289	0.00353866	FALSE	FALSE	static	-0.440608	-0.435571	-0.431933	-1.04922	0.107055	0.942165	0.942165
chr1	55280001	55290000	-0.411753	-0.573291	-0.599533	-0.431138	-0.5461	-0.363505	-0.356466	-0.312187	-0.492675	-0.477584	-0.407055	-0.444317	-0.354925	-0.412039	-0.470142	-0.301671	-0.530847	-0.442459	-0.56623	-0.666457	-0.558253	-0.914063	-0.577859	-0.591039	0.706218	0.0291953	FALSE	0.0360328	-0.18585	FALSE	0.0773414	-0.156655	FALSE	FALSE	static	-0.449782	-0.411241	-0.564364	0.31824	0.802151	-1.12039	0.802151
chr1	55350001	55360000	-0.274447	-0.269705	-0.461332	-0.299978	-0.187416	-0.149267	-0.27638	-0.442672	-0.27384	-0.373099	-0.333664	-0.372414	-0.40235	-0.217071	-0.249827	-0.287311	-0.218316	-0.278414	-0.314545	-0.290958	-0.247766	-0.443007	-0.498508	-0.355416	0.821171	-0.0185473	FALSE	0.805484	-0.0171692	FALSE	0.638205	-0.0357165	FALSE	FALSE	static	-0.273493	-0.301976	-0.311925	1.11822	-0.309743	-0.808479	1.11822
chr1	55870001	55880000	-0.431931	-0.447994	-0.520462	-0.527501	-0.277645	-0.466504	-0.419738	-0.475671	-0.299252	-0.284844	-0.442503	-0.38892	-0.424465	-0.688647	-0.374945	-0.487271	-0.528754	-0.319024	-0.300148	-0.39279	-0.369919	-0.24231	-0.338949	-0.485143	0.817186	0.0220751	FALSE	0.557621	0.0517262	FALSE	0.224653	0.0738013	FALSE	FALSE	static	-0.437757	-0.369594	-0.340568	-1.10476	0.261481	0.843283	0.843283
chr1	55880001	55890000	-0.437341	-0.496893	-0.56971	-0.580945	-0.340512	-0.535765	-0.452439	-0.486906	-0.369302	-0.340527	-0.547217	-0.386993	-0.483443	-0.751602	-0.44759	-0.510717	-0.603649	-0.325043	-0.273216	-0.423755	-0.496746	-0.295107	-0.3596	-0.539912	0.938921	0.00789001	FALSE	0.505935	0.0650456	FALSE	0.312556	0.0729356	FALSE	FALSE	static	-0.478263	-0.422958	-0.390535	-1.07483	0.171954	0.902873	0.902873
chr1	56570001	56580000	-0.985428	-0.847451	-0.720067	-0.672546	-0.684171	-0.887422	-0.620416	-0.729052	-0.843693	-0.817871	-0.757326	-0.795669	-0.870187	-0.790895	-0.751097	-1.01413	-0.72833	-0.696134	-0.644135	-0.877379	-0.752299	-0.84392	-0.786988	-0.713286	0.470984	-0.0617892	FALSE	0.206796	0.0747994	FALSE	0.87583	0.0130102	FALSE	FALSE	static	-0.747704	-0.805144	-0.738752	0.448632	-1.14575	0.697122	0.697122
chr1	56580001	56590000	-1.03964	-0.912199	-0.75481	-0.692138	-0.754204	-0.947289	-0.727152	-0.757668	-0.854352	-0.812756	-0.785643	-0.821132	-0.879512	-0.832502	-0.758103	-1.01669	-0.802499	-0.822752	-0.695886	-1.00056	-0.856989	-0.89141	-0.882304	-0.775209	0.817146	-0.0219492	FALSE	0.956783	0.00413548	FALSE	0.836137	-0.0178137	FALSE	FALSE	static	-0.797111	-0.820499	-0.816849	1.1425	-0.716251	-0.426246	1.1425
chr1	56590001	56600000	-0.918072	-0.865864	-0.729289	-0.610428	-0.716811	-1.03493	-0.693331	-0.690388	-0.772834	-0.711971	-0.718476	-0.73749	-0.828187	-0.799199	-0.733004	-0.889412	-0.825662	-0.838985	-0.640075	-0.973473	-0.83839	-0.866649	-0.887774	-0.795408	0.935195	0.00856707	FALSE	0.318232	-0.0594805	FALSE	0.561293	-0.0509134	FALSE	FALSE	static	-0.742586	-0.746594	-0.803388	0.635283	0.517411	-1.15269	0.635283
chr1	56820001	56830000	-0.954553	-0.91606	-0.928172	-0.848595	-0.783497	-0.454862	-0.638563	-0.64441	-0.998171	-0.828114	-0.753753	-0.932722	-0.788154	-0.870909	-0.863153	-0.846736	-0.724602	-0.607967	-0.867409	-0.768074	-0.800264	-0.774031	-0.861799	-0.706323	0.41993	-0.0891247	FALSE	0.107579	0.0964053	FALSE	0.950407	0.00728058	FALSE	FALSE	static	-0.789774	-0.847693	-0.754431	0.159831	-1.07029	0.910458	0.910458
chr1	56830001	56840000	-0.911983	-0.884364	-0.922789	-0.782741	-0.735246	-0.451248	-0.586731	-0.646714	-1.02006	-0.797854	-0.695677	-0.919821	-0.799584	-0.830984	-0.861677	-0.938139	-0.750112	-0.593335	-0.888774	-0.83182	-0.758184	-0.771475	-0.855354	-0.708804	0.286099	-0.117748	FALSE	0.212174	0.0882427	FALSE	0.780799	-0.0295052	FALSE	FALSE	static	-0.757918	-0.839454	-0.760303	0.602854	-1.15432	0.551466	0.602854
chr1	58120001	58130000	-0.148358	-0.0247184	-0.126569	-0.291117	-0.0573203	-0.149062	-0.0143485	0.0153505	-0.194547	-0.221816	-0.397745	-0.485711	-0.529234	-0.206719	-0.238413	-0.272908	-0.0537224	-0.0644038	-0.0315684	0.0155898	-0.00137583	-0.178028	-0.141839	0.00966753	0.0325907	-0.218869	FALSE	0.00635571	0.262677	TRUE	0.481439	0.0438079	FALSE	TRUE	down.early	-0.0881789	-0.264483	-0.0519801	0.410785	-1.13997	0.729188	0.729188
chr1	58170001	58180000	-0.332865	-0.332207	-0.33686	-0.464258	-0.272976	-0.320519	-0.310995	-0.317454	-0.38385	-0.373345	-0.356747	-0.372162	-0.324237	-0.266117	-0.565101	-0.338166	-0.342556	-0.138866	-0.225067	-0.357064	-0.28393	-0.401235	-0.388088	-0.317264	0.538153	-0.0364488	FALSE	0.308949	0.0657072	FALSE	0.588037	0.0292584	FALSE	FALSE	static	-0.322428	-0.353372	-0.306388	0.208021	-1.08765	0.879628	0.879628
chr1	58480001	58490000	-0.676905	-0.666967	-0.633334	-0.577991	-0.623316	-0.702661	-0.589529	-0.413044	-0.499457	-0.565473	-0.618458	-0.619012	-0.623408	-0.54456	-0.628893	-0.653512	-0.414924	-0.607837	-0.556763	-0.60196	-0.533281	-0.535925	-0.440569	-0.451479	0.806557	0.0163716	FALSE	0.10857	0.0762543	FALSE	0.109399	0.0926259	FALSE	FALSE	static	-0.599147	-0.567778	-0.488625	-0.830406	-0.279649	1.11005	1.11005
chr1	58500001	58510000	-0.760729	-0.764786	-0.622657	-0.667255	-0.657178	-0.743953	-0.613073	-0.408198	-0.594749	-0.688085	-0.560746	-0.610935	-0.547966	-0.486649	-0.686246	-0.706853	-0.466795	-0.646056	-0.515468	-0.644536	-0.510576	-0.515122	-0.479289	-0.467658	0.587503	0.0444498	FALSE	0.152719	0.0795912	FALSE	0.076668	0.124041	FALSE	FALSE	static	-0.647825	-0.592457	-0.499508	-0.905901	-0.167137	1.07304	1.07304
chr1	58510001	58520000	-0.650414	-0.699893	-0.497196	-0.613583	-0.59057	-0.662583	-0.523919	-0.346464	-0.56092	-0.681078	-0.433284	-0.496936	-0.434666	-0.456273	-0.615719	-0.596838	-0.426027	-0.518625	-0.418005	-0.525959	-0.408525	-0.41564	-0.419062	-0.403831	0.660846	0.0386134	FALSE	0.102891	0.0925051	FALSE	0.0510839	0.131118	FALSE	FALSE	static	-0.563922	-0.520163	-0.413943	-0.837315	-0.269947	1.10726	1.10726
chr1	58700001	58710000	-0.424147	-0.383893	-0.435538	-0.378196	-0.447799	-0.530772	-0.517858	-0.383035	-0.637422	-0.372284	-0.338805	-0.232977	-0.531486	-0.57414	-0.252863	-0.671531	-0.41416	-0.318894	-0.245969	-0.238512	-0.525616	-0.423589	-0.460076	-0.439444	0.913288	-0.0137839	FALSE	0.544519	0.0681561	FALSE	0.367981	0.0543722	FALSE	FALSE	static	-0.412381	-0.40961	-0.389215	-0.683384	-0.464373	1.14776	1.14776
chr1	58710001	58720000	-0.399922	-0.349918	-0.456275	-0.402633	-0.408348	-0.494218	-0.519388	-0.282153	-0.653213	-0.34718	-0.289703	-0.199618	-0.564928	-0.551274	-0.249253	-0.618262	-0.426641	-0.280941	-0.305657	-0.275953	-0.492905	-0.406211	-0.424809	-0.369554	0.87752	-0.020072	FALSE	0.581597	0.061345	FALSE	0.455311	0.0412729	FALSE	FALSE	static	-0.39557	-0.388576	-0.374784	-0.875526	-0.214227	1.08975	1.08975
chr1	58790001	58800000	-0.508027	-0.705274	-0.441739	-0.867974	-0.470417	-0.394495	-0.37137	-0.611564	-0.57476	-0.539747	-0.546474	-0.660564	-0.586797	-0.403323	-0.310488	-0.451788	-0.491115	-0.527587	-0.59892	-0.432896	-0.329693	-0.640196	-0.472255	-0.479754	0.771774	0.0371148	FALSE	0.890208	0.0126906	FALSE	0.62727	0.0498053	FALSE	FALSE	static	-0.600509	-0.510187	-0.485631	-1.13067	0.362374	0.768294	0.768294
chr1	59290001	59300000	-0.434297	-0.709722	-0.46855	-0.546941	-0.62395	-0.290181	-0.444469	-0.647822	-0.508775	-0.472306	-0.582303	-0.511569	-0.14139	-0.195832	-0.44004	-0.307054	-0.0661057	-0.119223	-0.277416	-0.282968	-0.286647	-0.410739	-0.388517	-0.464894	0.281909	0.125833	FALSE	0.332139	0.107845	FALSE	0.0221503	0.233678	FALSE	FALSE	static	-0.59361	-0.406122	-0.291609	-1.07018	0.159547	0.910635	0.910635
chr1	59300001	59310000	-0.382214	-0.628648	-0.375756	-0.498207	-0.573648	-0.223129	-0.458249	-0.606873	-0.397046	-0.422296	-0.462814	-0.389959	-0.0986982	-0.0755861	-0.350845	-0.25497	-0.0473949	-0.15044	-0.26509	-0.239352	-0.256455	-0.456678	-0.364519	-0.37389	0.151994	0.161814	FALSE	0.745057	0.0372995	FALSE	0.0398512	0.199113	FALSE	FALSE	static	-0.519801	-0.313945	-0.272389	-1.14041	0.413372	0.727039	0.727039
chr1	59690001	59700000	-0.611565	-0.558498	-0.453202	-0.542725	-0.514899	-0.486457	-0.320882	-0.412742	-0.653961	-0.552679	-0.424551	-0.391446	-0.559652	-0.59846	-0.482412	-0.593395	-0.656498	-0.422379	-0.445435	-0.388992	-0.526876	-0.465743	-0.513203	-0.434523	0.549607	-0.0444481	FALSE	0.448675	0.0503633	FALSE	0.935089	0.00591518	FALSE	FALSE	static	-0.486771	-0.505457	-0.469783	0.0317487	-1.0155	0.983748	0.983748
chr1	59760001	59770000	-0.5792	-0.771488	-0.573905	-0.652281	-0.746246	-0.384566	-0.558202	-0.752719	-0.76159	-0.545263	-0.668753	-0.769009	-0.729788	-0.488374	-0.547056	-0.659702	-0.455131	-0.368254	-0.33999	-0.424199	-0.462283	-0.344235	-0.365395	-0.474902	0.862155	-0.0188659	FALSE	0.00328651	0.241893	TRUE	0.0105369	0.223027	FALSE	TRUE	up.late	-0.595221	-0.636837	-0.398179	-0.406389	-0.732827	1.13922	1.13922
chr1	59950001	59960000	-0.517118	-0.438218	-0.697245	-0.632237	-0.343888	-0.200624	-0.335941	-0.43205	-0.471698	-0.427709	-0.493077	-0.47757	-0.390112	-0.448322	-0.553946	-0.354778	-0.265125	-0.33793	-0.378117	-0.37497	-0.440978	-0.354502	-0.468787	-0.39181	0.982848	-0.00248633	FALSE	0.0985901	0.0756242	FALSE	0.413309	0.0731379	FALSE	FALSE	static	-0.457899	-0.432427	-0.372595	-0.843232	-0.261553	1.10479	1.10479
chr1	59960001	59970000	-0.596092	-0.568174	-0.809312	-0.783726	-0.401791	-0.269124	-0.381521	-0.544186	-0.546848	-0.48772	-0.586236	-0.549431	-0.439942	-0.525576	-0.599289	-0.423877	-0.440794	-0.506276	-0.464717	-0.514381	-0.599238	-0.445969	-0.620247	-0.475685	0.851205	0.0243759	FALSE	0.838714	0.0114514	FALSE	0.745147	0.0358272	FALSE	FALSE	static	-0.558713	-0.504385	-0.503717	-1.15464	0.566738	0.587898	0.587898
chr1	60260001	60270000	-0.185026	-0.232042	-0.24256	-0.259429	-0.134947	-0.0486466	-0.198826	-0.356308	-0.160289	-0.293821	-0.259208	-0.354115	-0.0605865	-0.140508	-0.157585	-0.382292	-0.18064	-0.140123	-0.0794528	-0.0916014	-0.16927	-0.295428	-0.182185	-0.304355	0.839947	-0.0188274	FALSE	0.559209	0.0456686	FALSE	0.679379	0.0268412	FALSE	FALSE	static	-0.178998	-0.215113	-0.173314	0.447446	-1.14559	0.698147	0.698147
chr1	60280001	60290000	-0.189611	-0.279488	-0.287904	-0.384982	-0.213041	0.0288807	-0.165936	-0.308597	-0.396049	-0.374349	-0.329525	-0.366782	-0.109086	-0.193772	-0.274002	-0.374787	-0.258838	-0.182973	-0.151733	-0.118847	-0.114489	-0.38151	-0.220904	-0.315931	0.391752	-0.0772094	FALSE	0.247972	0.0841412	FALSE	0.940087	0.00693183	FALSE	FALSE	static	-0.207622	-0.290544	-0.201683	0.516546	-1.15264	0.63609	0.63609
chr1	60290001	60300000	-0.139089	-0.297657	-0.246621	-0.396658	-0.183138	0.0429259	-0.137406	-0.199077	-0.423154	-0.344537	-0.317805	-0.340081	-0.143252	-0.182766	-0.32819	-0.333516	-0.186937	-0.11102	-0.122774	-0.0770029	-0.0301131	-0.392766	-0.195092	-0.265388	0.226279	-0.107072	FALSE	0.0951328	0.129026	FALSE	0.818589	0.0219534	FALSE	FALSE	static	-0.17899	-0.281931	-0.155704	0.395285	-1.13722	0.741939	0.741939
chr1	60760001	60770000	-0.330417	-0.254925	-0.197854	-0.362173	-0.221055	-0.129435	-0.0432446	-0.010116	-0.239959	-0.280025	-0.196865	-0.187768	-0.162109	-0.218019	-0.2582	-0.077845	-0.238148	-0.199146	-0.320018	-0.162792	-0.306479	-0.218453	-0.142273	-0.338113	0.925335	-0.0089462	FALSE	0.46866	-0.038079	FALSE	0.529997	-0.0470252	FALSE	FALSE	static	-0.205015	-0.185494	-0.209848	-0.379708	1.13424	-0.754533	1.13424
chr1	60810001	60820000	-0.444154	-0.360841	-0.47372	-0.425589	-0.448409	-0.133593	-0.327611	-0.237392	-0.383683	-0.399481	-0.393097	-0.453992	-0.382338	-0.276837	-0.307425	-0.317213	-0.20505	-0.290852	-0.1476	-0.270629	-0.502371	-0.354844	-0.353408	-0.437896	0.930995	-0.00784444	FALSE	0.547862	0.0439269	FALSE	0.681755	0.0360825	FALSE	FALSE	static	-0.356076	-0.354022	-0.304803	-0.612366	-0.541612	1.15398	1.15398
chr1	60830001	60840000	-0.430931	-0.328516	-0.442676	-0.475909	-0.363179	-0.190023	-0.338366	-0.294413	-0.353213	-0.405345	-0.364018	-0.409677	-0.421377	-0.398474	-0.252287	-0.391976	-0.347979	-0.361419	-0.178795	-0.343022	-0.541243	-0.504963	-0.557064	-0.579849	0.810247	-0.0165442	FALSE	0.536874	-0.0522458	FALSE	0.418126	-0.0687899	FALSE	FALSE	static	-0.355778	-0.35408	-0.418933	0.55423	0.600165	-1.1544	0.600165
chr1	61050001	61060000	-0.850736	-0.771621	-0.793843	-0.981799	-0.682605	-0.71861	-0.788435	-0.775583	-0.634627	-0.63488	-0.830404	-0.475941	-0.714316	-0.559075	-0.534692	-0.767314	-0.624876	-0.553513	-0.577794	-0.658104	-0.69535	-0.636676	-0.668274	-0.629424	0.0819286	0.151498	FALSE	0.86673	0.0134047	FALSE	0.00759538	0.164903	TRUE	TRUE	up.early	-0.776518	-0.609914	-0.626791	-1.1498	0.666914	0.482889	0.666914
chr1	61340001	61350000	-0.439262	-0.518856	-0.560036	-0.653625	-0.49531	-0.377964	-0.600177	-0.568739	-0.606998	-0.608515	-0.568306	-0.540206	-0.593605	-0.316185	-0.599494	-0.619123	-0.372367	-0.110087	-0.36692	-0.377847	-0.328298	-0.380285	-0.449915	-0.421876	0.713948	-0.029808	FALSE	0.0118026	0.205605	FALSE	0.0162121	0.175796	FALSE	FALSE	static	-0.514471	-0.517564	-0.350487	-0.561095	-0.593454	1.15455	1.15455
chr1	61350001	61360000	-0.421268	-0.529336	-0.500039	-0.599231	-0.441866	-0.386935	-0.575244	-0.592337	-0.563625	-0.674681	-0.560736	-0.520145	-0.545943	-0.274729	-0.597159	-0.618119	-0.273442	-0.0614324	-0.300423	-0.332515	-0.315891	-0.32994	-0.41296	-0.379162	0.65506	-0.03861	FALSE	0.00812803	0.243672	TRUE	0.00705669	0.205062	TRUE	TRUE	up.late	-0.489164	-0.498105	-0.303796	-0.536118	-0.617624	1.15374	1.15374
chr1	61460001	61470000	-0.377846	-0.416549	-0.431405	-0.383943	-0.253579	-0.562856	-0.49043	-0.392682	-0.33763	-0.378744	-0.450311	-0.415919	-0.33022	-0.41284	-0.436239	-0.524181	-0.328192	-0.542318	-0.410996	-0.317385	-0.490438	-0.412966	-0.483594	-0.380847	0.968753	0.00290068	FALSE	0.87119	-0.0100816	FALSE	0.917201	-0.00718092	FALSE	FALSE	static	-0.391145	-0.385555	-0.398184	0.0762784	0.959677	-1.03595	0.959677
chr1	61670001	61680000	-0.290755	-0.32119	-0.222289	-0.169595	-0.241993	-0.163333	-0.375484	-0.319708	-0.177674	-0.269824	-0.350983	-0.0443289	-0.356314	-0.430625	-0.47291	-0.381717	-0.104714	-0.0294108	-0.209888	-0.162381	-0.1675	-0.127943	-0.205109	-0.175162	0.618407	-0.0475035	FALSE	0.0600218	0.162784	FALSE	0.0237773	0.11528	FALSE	FALSE	static	-0.244565	-0.256201	-0.132317	-0.490218	-0.660299	1.15052	1.15052
chr1	61850001	61860000	-0.514302	-0.466123	-0.380157	-0.466506	-0.297761	-0.405294	-0.499893	-0.401138	-0.324698	-0.383602	-0.431318	-0.332615	-0.399142	-0.25659	-0.289078	-0.412729	-0.119569	-0.192101	-0.108918	-0.151283	-0.304958	-0.191487	-0.143079	-0.189176	0.156561	0.0751754	FALSE	0.00149174	0.17865	TRUE	0.000199139	0.253825	TRUE	TRUE	up.late	-0.423924	-0.337188	-0.163345	-0.872472	-0.218817	1.09129	1.09129
chr1	61860001	61870000	-0.492553	-0.501596	-0.431189	-0.475573	-0.306413	-0.427558	-0.542568	-0.461459	-0.371132	-0.408946	-0.461268	-0.369651	-0.41353	-0.2379	-0.3092	-0.434866	-0.181742	-0.296287	-0.221527	-0.250785	-0.340544	-0.232762	-0.159468	-0.277013	0.161055	0.079052	FALSE	0.013633	0.130796	FALSE	0.000664614	0.209848	TRUE	TRUE	up.late	-0.452003	-0.363389	-0.224212	-0.918496	-0.146783	1.06528	1.06528
chr1	61870001	61880000	-0.513094	-0.480485	-0.483906	-0.497583	-0.282985	-0.410108	-0.486082	-0.470636	-0.412822	-0.438839	-0.487298	-0.371702	-0.449203	-0.161986	-0.281017	-0.426487	-0.244805	-0.354365	-0.316125	-0.368941	-0.299883	-0.23644	-0.13894	-0.322545	0.305873	0.0744406	FALSE	0.1713	0.0934138	FALSE	0.00536086	0.167854	TRUE	TRUE	up.late	-0.460504	-0.372057	-0.248782	-0.940933	-0.109174	1.05011	1.05011
chr1	62060001	62070000	-0.112596	-0.245017	-0.170791	-0.207734	-0.0719512	-0.394439	-0.121274	-0.285162	-0.260474	-0.172324	-0.166397	-0.112582	-0.148092	-0.316357	-0.375808	-0.428598	-0.144114	-0.0853826	-0.0374004	-0.338736	-0.0658327	-0.115173	-0.150779	-0.0766828	0.615623	-0.0464584	FALSE	0.120812	0.120816	FALSE	0.286963	0.074358	FALSE	FALSE	static	-0.175951	-0.196787	-0.105127	-0.346795	-0.780437	1.12723	1.12723
chr1	62070001	62080000	-0.0730944	-0.155217	-0.12157	-0.165736	0.0204861	-0.301451	-0.105039	-0.243938	-0.205621	-0.153046	-0.113873	-0.0991889	-0.0773883	-0.190074	-0.341904	-0.349656	-0.127663	-0.0295463	0.0113835	-0.399566	-0.0689089	-0.144784	-0.195824	-0.113212	0.564074	-0.0481489	FALSE	0.520229	0.0578288	FALSE	0.91669	0.00967992	FALSE	FALSE	static	-0.122557	-0.14496	-0.119641	0.468895	-1.14829	0.679392	0.679392
chr1	62130001	62140000	-0.327722	-0.371095	-0.307696	-0.368735	-0.371708	-0.429502	-0.227415	-0.269302	-0.299509	-0.634625	-0.100518	-0.293684	-0.292775	-0.277034	-0.373571	-0.224199	-0.205147	-0.217037	-0.0773062	-0.487404	-0.47339	-0.314615	-0.749178	-0.4142	0.835636	0.0221574	FALSE	0.710579	-0.0552953	FALSE	0.785112	-0.0331379	FALSE	FALSE	static	-0.325752	-0.279532	-0.381968	0.0649463	0.965944	-1.03089	0.965944
chr1	62140001	62150000	-0.44446	-0.570102	-0.519906	-0.525107	-0.470816	-0.657294	-0.364233	-0.423384	-0.428895	-0.718486	-0.231004	-0.456566	-0.420446	-0.38466	-0.468932	-0.394421	-0.332068	-0.381082	-0.261785	-0.51892	-0.607881	-0.512781	-0.930989	-0.527024	0.529424	0.0589868	FALSE	0.606213	-0.0711399	FALSE	0.927206	-0.0121532	FALSE	FALSE	static	-0.486948	-0.410099	-0.524056	-0.227911	1.09428	-0.866372	1.09428
chr1	62430001	62440000	-0.875329	-0.84269	-1.00092	-0.915457	-0.891166	-0.9225	-0.780126	-0.910222	-0.958973	-0.676845	-0.746544	-0.809517	-0.729662	-0.943474	-0.783635	-0.615903	-0.620886	-0.733695	-0.475448	-0.58298	-0.769594	-0.683676	-0.595414	-0.795444	0.161487	0.109232	FALSE	0.133594	0.125927	FALSE	0.0030947	0.235159	TRUE	TRUE	up.late	-0.880783	-0.770517	-0.652092	-0.9879	-0.0237761	1.01168	1.01168
chr1	62440001	62450000	-0.783796	-0.767085	-0.921471	-0.798424	-0.830743	-0.858213	-0.743001	-0.791579	-0.878889	-0.633012	-0.633105	-0.760522	-0.635453	-0.862738	-0.791462	-0.66252	-0.547553	-0.561805	-0.427761	-0.417903	-0.684389	-0.62768	-0.509662	-0.78268	0.237508	0.0795763	FALSE	0.059678	0.162284	FALSE	0.00569859	0.24186	TRUE	TRUE	up.late	-0.794955	-0.712152	-0.568171	-0.899237	-0.177702	1.07694	1.07694
chr1	62450001	62460000	-0.625916	-0.63963	-0.746039	-0.652024	-0.6748	-0.743373	-0.68022	-0.774964	-0.718333	-0.525008	-0.492375	-0.657685	-0.496458	-0.733916	-0.768833	-0.646935	-0.401858	-0.380304	-0.374935	-0.238977	-0.561559	-0.535399	-0.393757	-0.690569	0.376425	0.062178	FALSE	0.0551549	0.182773	FALSE	0.00953462	0.244951	TRUE	TRUE	up.late	-0.66383	-0.599914	-0.44969	-0.843127	-0.261702	1.10483	1.10483
chr1	62750001	62760000	-0.296301	-0.415295	-0.386782	-0.320694	-0.353602	-0.460481	-0.663726	-0.397116	-0.229018	-0.310301	-0.39292	-0.393104	-0.389556	-0.287839	-0.362023	-0.545601	-0.356916	-0.392343	-0.272331	-0.315667	-0.348262	-0.23547	-0.23732	-0.25166	0.576737	0.0479544	FALSE	0.287896	0.0625491	FALSE	0.09531	0.110504	FALSE	FALSE	static	-0.376492	-0.331229	-0.27357	-0.957541	-0.0800996	1.03764	1.03764
chr1	62760001	62770000	-0.424619	-0.522433	-0.492143	-0.454745	-0.561743	-0.525539	-0.710087	-0.505527	-0.360532	-0.411275	-0.517245	-0.504491	-0.495113	-0.370595	-0.43217	-0.613604	-0.407649	-0.387255	-0.278903	-0.337451	-0.430087	-0.32704	-0.300361	-0.304076	0.360269	0.0614766	FALSE	0.0374656	0.116525	FALSE	0.00417788	0.178002	TRUE	TRUE	up.late	-0.48996	-0.436773	-0.328769	-0.870031	-0.222468	1.0925	1.0925
chr1	62810001	62820000	-0.39951	-0.446241	-0.40922	-0.428368	-0.686436	-0.480412	-0.487154	-0.360156	-0.432048	-0.321151	-0.448497	-0.366269	-0.37486	-0.46264	-0.316426	-0.521692	-0.346598	-0.296247	-0.165608	-0.409343	-0.510625	-0.313624	-0.475639	-0.317364	0.412537	0.0567391	FALSE	0.475269	0.0510671	FALSE	0.139963	0.107806	FALSE	FALSE	static	-0.413351	-0.376095	-0.348136	-1.04398	0.0947077	0.949277	0.949277
chr1	62820001	62830000	-0.344262	-0.406496	-0.34615	-0.334534	-0.619517	-0.398066	-0.509524	-0.366708	-0.382192	-0.306484	-0.411981	-0.317938	-0.346651	-0.397217	-0.323327	-0.466638	-0.265504	-0.28432	-0.252099	-0.331154	-0.400774	-0.194855	-0.465225	-0.300603	0.475004	0.0466037	FALSE	0.288093	0.057237	FALSE	0.111192	0.103841	FALSE	FALSE	static	-0.358128	-0.338092	-0.300234	-0.883538	-0.202063	1.0856	1.0856
chr1	62830001	62840000	-0.303167	-0.321807	-0.293336	-0.263864	-0.545697	-0.335976	-0.409776	-0.37999	-0.360597	-0.317748	-0.383214	-0.272894	-0.323687	-0.251455	-0.31539	-0.380094	-0.183509	-0.191292	-0.305157	-0.27358	-0.312823	-0.113302	-0.395205	-0.268674	0.605971	0.0310668	FALSE	0.188703	0.070192	FALSE	0.104297	0.101259	FALSE	FALSE	static	-0.295092	-0.300807	-0.243204	-0.484964	-0.665046	1.15001	1.15001
chr1	62840001	62850000	-0.217686	-0.248408	-0.235407	-0.184426	-0.365441	-0.300065	-0.324725	-0.391526	-0.305523	-0.326178	-0.273977	-0.230546	-0.289898	-0.0956516	-0.31378	-0.262007	-0.0939084	-0.160684	-0.289989	-0.18817	-0.225934	-0.0530053	-0.328377	-0.257815	0.740377	0.0212655	FALSE	0.322242	0.0624597	FALSE	0.158757	0.0837252	FALSE	FALSE	static	-0.222067	-0.242697	-0.186452	-0.175566	-0.900591	1.07616	1.07616
chr1	63150001	63160000	-0.0800964	-0.0856418	-0.105177	-0.180627	-0.337508	-0.000183959	-0.146645	0.0567112	-0.128753	-0.0778768	-0.184945	-0.373106	-0.112554	-0.231491	-0.19068	-0.0318951	-0.33541	-0.162292	-0.155391	-0.0534702	-0.0494196	-0.176336	-0.168494	-0.12071	0.535199	-0.0565166	FALSE	0.870996	0.0137222	FALSE	0.575901	-0.0427944	FALSE	FALSE	static	-0.113561	-0.146791	-0.125675	0.898783	-1.0772	0.178415	0.898783
chr1	63160001	63170000	-0.107266	-0.0343798	-0.110329	-0.111114	-0.257074	0.00876802	-0.152226	0.0481824	-0.149507	-0.0901161	-0.238241	-0.392336	-0.142446	-0.239165	-0.0855449	-0.0476109	-0.250705	-0.154358	-0.123087	-0.0823568	-0.0864362	-0.147998	-0.196105	-0.11801	0.305979	-0.0836911	FALSE	0.696998	0.0282388	FALSE	0.321614	-0.0554523	FALSE	FALSE	static	-0.0737181	-0.159285	-0.11672	1.0017	-0.998293	-0.00340486	1.0017
chr1	63300001	63310000	-0.0206363	-0.143646	-0.0747766	-0.0776366	-0.283808	-0.223693	-0.0409147	-0.105612	-0.0174967	-0.276411	-0.119978	-0.0172822	-0.0441196	-0.0366095	-0.142552	-0.133144	-0.103159	-0.353613	-0.192854	-0.191927	-0.365716	-0.298544	-0.329502	-0.0819887	0.772387	0.0228914	FALSE	0.0627795	-0.141214	FALSE	0.0997151	-0.118323	FALSE	FALSE	static	-0.0907611	-0.0783544	-0.227722	0.500891	0.650571	-1.15146	0.650571
chr1	63310001	63320000	-0.0490949	-0.18269	-0.0681199	-0.0444472	-0.365002	-0.204803	-0.136476	-0.120708	-0.0715665	-0.23985	-0.128881	-0.0182791	-0.0336239	-0.0354733	-0.123932	-0.119202	-0.0952153	-0.353657	-0.219875	-0.172963	-0.40104	-0.25678	-0.310005	-0.0778174	0.495762	0.0500666	FALSE	0.0614814	-0.139568	FALSE	0.251356	-0.0895014	FALSE	FALSE	static	-0.109424	-0.0803389	-0.230788	0.385447	0.749918	-1.13537	0.749918
chr1	63530001	63540000	-0.298746	-0.325144	-0.46172	-0.51519	-0.566417	-0.414822	-0.472935	-0.383695	-0.403715	-0.405527	-0.411525	-0.334195	-0.456221	-0.313488	-0.783751	-0.279665	-0.448356	-0.349857	-0.595097	-0.492454	-0.470955	-0.605923	-0.484327	-0.617039	0.958817	0.00632302	FALSE	0.385744	-0.0844902	FALSE	0.222948	-0.0781672	FALSE	FALSE	static	-0.379234	-0.387887	-0.494693	0.643317	0.508767	-1.15208	0.643317
chr1	63540001	63550000	-0.429704	-0.449497	-0.587769	-0.57898	-0.680248	-0.461728	-0.52908	-0.424121	-0.512312	-0.471844	-0.472847	-0.40557	-0.520497	-0.374728	-0.856561	-0.325485	-0.519617	-0.394939	-0.764932	-0.552736	-0.537893	-0.667009	-0.593052	-0.733605	0.833832	0.0251605	FALSE	0.333638	-0.102992	FALSE	0.304449	-0.077832	FALSE	FALSE	static	-0.478195	-0.456691	-0.581646	0.408885	0.730763	-1.13965	0.730763
chr1	63550001	63560000	-0.532917	-0.484687	-0.593642	-0.605047	-0.753421	-0.444391	-0.512746	-0.401692	-0.586702	-0.514484	-0.487752	-0.433153	-0.538628	-0.381381	-0.825412	-0.323414	-0.533945	-0.388681	-0.750759	-0.555948	-0.557883	-0.652604	-0.627314	-0.739625	0.804884	0.0297023	FALSE	0.38345	-0.089479	FALSE	0.462816	-0.0597767	FALSE	FALSE	static	-0.512603	-0.482073	-0.588385	0.275567	0.833323	-1.10889	0.833323
chr1	63690001	63700000	-0.0237527	-0.0457126	0.025526	-0.176205	-0.215234	0.00302945	-0.116929	-0.0724351	-0.118367	-0.059809	-0.122176	-0.19023	-0.0039549	-0.166848	-0.208748	-0.262126	-0.173527	-0.482022	-0.2079	-0.306466	-0.340727	-0.380968	-0.31088	-0.294058	0.333054	-0.0638181	FALSE	0.0162883	-0.170536	FALSE	0.00237206	-0.234354	TRUE	TRUE	down.late	-0.0661316	-0.121041	-0.28751	0.798896	0.322579	-1.12148	0.798896
chr1	63700001	63710000	0.0549649	0.0180638	0.0833994	-0.0725518	-0.0955228	0.0824339	0.0327347	0.0181132	-0.034939	0.0361295	-0.0324795	-0.0751892	0.0567296	-0.0826216	-0.0851227	-0.18258	-0.0962082	-0.392472	-0.107802	-0.196658	-0.228522	-0.308503	-0.19205	-0.23707	0.240858	-0.0652135	FALSE	0.0151108	-0.169902	FALSE	0.00185259	-0.235115	TRUE	TRUE	down.late	0.0231826	-0.0269171	-0.199362	0.778476	0.349329	-1.12781	0.778476
chr1	63920001	63930000	-0.204582	-0.337824	-0.143083	-0.303514	-0.230709	-0.281537	-0.244629	-0.36516	-0.151046	-0.150857	-0.143411	-0.19916	-0.144724	-0.30304	-0.0134514	-0.0441003	-0.144988	-0.016154	-0.0914366	0.0513979	-0.140463	0.0286838	-0.241008	-0.0909229	0.0706222	0.120156	FALSE	0.365596	0.0631124	FALSE	0.00794925	0.183268	TRUE	TRUE	up.early	-0.230386	-0.128838	-0.0504408	-1.04002	0.0855373	0.954484	0.954484
chr1	63930001	63940000	-0.193936	-0.21508	-0.0916868	-0.221253	-0.196429	-0.23613	-0.20548	-0.287371	-0.100862	-0.106767	-0.172961	-0.146714	-0.161518	-0.205937	0.00701615	0.0152853	-0.139521	0.0199787	-0.085769	0.024038	-0.124835	0.0137708	-0.219853	-0.119364	0.0899618	0.0968635	FALSE	0.66003	0.030113	FALSE	0.0252451	0.126976	FALSE	FALSE	static	-0.176077	-0.09582	-0.0508962	-1.07984	0.185724	0.894118	0.894118
chr1	64130001	64140000	-0.40948	-0.42652	-0.424704	-0.579064	-0.340339	-0.513892	-0.383052	-0.486306	-0.411417	-0.530901	-0.559329	-0.503636	-0.533542	-0.518259	-0.406593	-0.539627	-0.340171	-0.333183	-0.242183	-0.345283	-0.33217	-0.317765	-0.256597	-0.649813	0.303886	-0.0549933	FALSE	0.0575484	0.148267	FALSE	0.206031	0.093274	FALSE	FALSE	static	-0.444587	-0.480085	-0.512775	1.01344	-0.0274403	-0.985997	1.01344
chr1	64140001	64150000	-0.404995	-0.509967	-0.425304	-0.576912	-0.45878	-0.575581	-0.422242	-0.52923	-0.434865	-0.535369	-0.541985	-0.548519	-0.6115	-0.531663	-0.439102	-0.611835	-0.351682	-0.385136	-0.302435	-0.40556	-0.398832	-0.311149	-0.326249	-0.604054	0.413556	-0.0439784	FALSE	0.0253356	0.146218	FALSE	0.0867619	0.102239	FALSE	FALSE	static	-0.491077	-0.506715	-0.488476	0.440536	-1.14463	0.704094	0.704094
chr1	64250001	64260000	-1.28921	-1.4224	-1.18883	-1.20665	-1.31138	-1.43211	-1.07158	-0.953151	-1.16009	-0.951592	-0.963108	-1.37296	-1.26547	-1.15869	-0.901654	-1.19703	-1.2702	-1.18485	-1.25574	-1.26377	-1.06705	-1.05607	-1.47222	-1.45341	0.387121	0.11309	FALSE	0.26439	-0.13159	FALSE	0.885272	-0.0185002	FALSE	FALSE	static	-1.2356	-1.08833	-1.22656	-0.631263	1.15297	-0.521704	1.15297
chr1	64260001	64270000	-1.25126	-1.39749	-1.18643	-1.19269	-1.25274	-1.33229	-0.929668	-0.947439	-1.11529	-0.963385	-0.980547	-1.34735	-1.25526	-1.12801	-0.911308	-1.25847	-1.20849	-1.0438	-1.19256	-1.11905	-1.0541	-1.0511	-1.44924	-1.39937	0.626952	0.0663002	FALSE	0.574913	-0.069763	FALSE	0.980699	-0.00346287	FALSE	FALSE	static	-1.18562	-1.08372	-1.17876	-0.636515	1.15261	-0.516091	1.15261
chr1	64450001	64460000	-0.0403772	-0.37203	-0.137771	-0.0778186	-0.0232084	-0.227004	-0.0379525	-0.0670289	-0.0380063	-0.102072	-0.0511033	-0.0207788	-0.153231	-0.105565	0.0214882	0.0568444	0.00412838	0.171905	-0.0590194	0.0564096	-0.105412	-0.112346	-0.289856	-0.0964704	0.34459	0.0738459	FALSE	0.961009	-0.00477971	FALSE	0.450482	0.0690662	FALSE	FALSE	static	-0.0890515	-0.0135242	-0.0338244	-1.11509	0.817226	0.297861	0.817226
chr1	64460001	64470000	-0.111947	-0.336081	-0.170727	-0.0797685	-0.0888934	-0.194936	-0.118853	-0.126516	-0.0522926	-0.0838257	-0.120605	-0.0113354	-0.135684	-0.135547	0.0153537	0.0233991	-0.0598914	0.102094	-0.0777819	0.0420927	-0.124864	-0.105429	-0.341019	-0.127592	0.128523	0.090898	FALSE	0.785104	-0.0239816	FALSE	0.392466	0.0669164	FALSE	FALSE	static	-0.140034	-0.0185723	-0.0621164	-1.08001	0.893816	0.186195	0.893816
chr1	64500001	64510000	0.0146301	-0.0694037	0.0583444	0.151582	-0.298157	0.0718105	-0.0468547	0.165409	0.0263802	0.111352	-0.197688	0.0584268	0.221348	-0.0442793	0.0560554	-0.0650928	-0.154574	0.0512877	0.0919109	0.080256	-0.129788	-0.0204256	-0.126977	-0.116607	0.910594	0.0148927	FALSE	0.487192	-0.0614275	FALSE	0.622022	-0.0465348	FALSE	FALSE	static	-0.0408081	0.0705816	-0.0155915	-0.779603	1.12748	-0.347874	1.12748
chr1	64670001	64680000	-0.311271	-0.273137	-0.254147	-0.2856	-0.256838	-0.280746	-0.260982	-0.260637	-0.204818	-0.259783	-0.308512	-0.36204	-0.325028	-0.278947	-0.365518	-0.322161	-0.111331	-0.174086	-0.228344	-0.504001	-0.278613	-0.222907	-0.229984	-0.161722	0.35273	-0.0304308	FALSE	0.357614	0.0644772	FALSE	0.591975	0.0340464	FALSE	FALSE	static	-0.255602	-0.27745	-0.212523	-0.214222	-0.875529	1.08975	1.08975
chr1	64680001	64690000	-0.272893	-0.231724	-0.230256	-0.277488	-0.241374	-0.26665	-0.235348	-0.294941	-0.12281	-0.225162	-0.262952	-0.282024	-0.257239	-0.266454	-0.396943	-0.271287	-0.164945	-0.186588	-0.218188	-0.54633	-0.319472	-0.235109	-0.209766	-0.144663	0.936601	-0.00427471	FALSE	0.936293	0.00747636	FALSE	0.968163	0.00320165	FALSE	FALSE	static	-0.234725	-0.232749	-0.221194	-0.707251	-0.436847	1.1441	1.1441
chr1	64820001	64830000	-0.81683	-0.758	-0.600816	-0.815883	-0.719033	-0.581676	-0.712374	-0.430785	-0.573461	-0.623242	-0.642261	-0.69492	-0.379137	-0.655392	-0.522018	-0.633489	-0.474342	-0.417381	-0.412285	-0.363446	-0.670136	-0.501862	-0.4687	-0.444942	0.335607	0.0889346	FALSE	0.087034	0.121353	FALSE	0.0169724	0.210288	FALSE	FALSE	static	-0.716529	-0.571513	-0.474943	-1.05976	0.132799	0.926965	0.926965
chr1	64830001	64840000	-0.891163	-0.888703	-0.692914	-0.845293	-0.802553	-0.68003	-0.702387	-0.513748	-0.640302	-0.658993	-0.693841	-0.751603	-0.468241	-0.683218	-0.612617	-0.624481	-0.520292	-0.483887	-0.458472	-0.405741	-0.681382	-0.548853	-0.505517	-0.481342	0.200554	0.110437	FALSE	0.0354207	0.130976	FALSE	0.00705723	0.241413	TRUE	TRUE	up.early	-0.820018	-0.6266	-0.514027	-1.07563	0.174123	0.901504	0.901504
chr1	65040001	65050000	-0.323381	-0.444636	-0.293834	-0.488748	-0.421003	-0.440922	-0.409115	-0.536378	-0.567602	-0.542148	-0.438199	-0.475433	-0.599298	-0.578652	-0.424887	-0.276336	-0.548469	-0.316513	-0.406175	-0.159321	-0.445799	-0.484192	-0.505202	-0.481785	0.361269	-0.0680672	FALSE	0.4342	0.0693876	FALSE	0.988375	0.00132031	FALSE	FALSE	static	-0.397464	-0.545667	-0.419577	0.710099	-1.1436	0.433506	0.710099
chr1	65050001	65060000	-0.361672	-0.477917	-0.350796	-0.549913	-0.398493	-0.48238	-0.422546	-0.530272	-0.624797	-0.605685	-0.45778	-0.48201	-0.619386	-0.503356	-0.451923	-0.299096	-0.705007	-0.318285	-0.464555	-0.177747	-0.477849	-0.542477	-0.509412	-0.488147	0.437364	-0.0587556	FALSE	0.678676	0.0450693	FALSE	0.889767	-0.0136862	FALSE	FALSE	static	-0.429381	-0.576538	-0.459717	0.761455	-1.13249	0.37103	0.761455
chr1	65220001	65230000	-0.923599	-0.650276	-0.652367	-0.566504	-0.667849	-0.542687	-0.409764	-0.455071	-0.556509	-0.543594	-0.500756	-0.590853	-0.409241	-0.485272	-0.46346	-0.542908	-0.528223	-0.472386	-0.642936	-0.606916	-0.616224	-0.612	-0.785065	-0.79634	0.315517	0.0969405	FALSE	0.078973	-0.120937	FALSE	0.823464	-0.0239966	FALSE	FALSE	static	-0.616086	-0.498363	-0.634089	-0.45092	1.14606	-0.695139	1.14606
chr1	65230001	65240000	-0.883896	-0.593208	-0.638472	-0.547678	-0.664044	-0.534649	-0.394906	-0.438183	-0.550299	-0.500753	-0.528064	-0.612067	-0.397723	-0.515357	-0.459472	-0.579133	-0.605392	-0.49364	-0.646881	-0.64369	-0.630688	-0.656157	-0.832295	-0.82819	0.468658	0.069021	FALSE	0.0406923	-0.149258	FALSE	0.395706	-0.0802371	FALSE	FALSE	static	-0.589909	-0.501742	-0.669641	-0.0334743	1.01632	-0.982843	1.01632
chr1	65430001	65440000	-0.466262	-0.336945	-0.355885	-0.599657	-0.522852	-0.289789	-0.210274	-0.329578	-0.370076	-0.446951	-0.388087	-0.32587	-0.349036	-0.408373	-0.307564	-0.4528	-0.144739	-0.0804909	-0.460335	-0.101998	-0.17693	-0.3964	-0.276329	-0.246148	0.934585	0.00781063	FALSE	0.077398	0.145674	FALSE	0.0998612	0.153484	FALSE	FALSE	static	-0.381117	-0.359006	-0.224891	-0.703165	-0.44162	1.14478	1.14478
chr1	65680001	65690000	-0.478185	-0.454784	-0.433933	-0.468504	-0.421557	-0.413522	-0.489471	-0.615008	-0.735771	-0.566108	-0.419553	-0.502236	-0.412543	-0.535735	-0.677821	-0.450041	-0.169622	-0.488627	-0.562215	-0.547592	-0.538456	-0.548001	-0.539653	-0.477483	0.388206	-0.0656055	FALSE	0.584463	0.0535197	FALSE	0.883888	-0.0120858	FALSE	FALSE	static	-0.446956	-0.492593	-0.47549	1.07235	-0.907059	-0.165286	1.07235
chr1	65690001	65700000	-0.57814	-0.491619	-0.557735	-0.522909	-0.461526	-0.58232	-0.585718	-0.637208	-0.804176	-0.672509	-0.504628	-0.549425	-0.472564	-0.645407	-0.842222	-0.483311	-0.188079	-0.558974	-0.604124	-0.574314	-0.547097	-0.577656	-0.535511	-0.465989	0.436118	-0.0696333	FALSE	0.260029	0.115312	FALSE	0.545674	0.0456791	FALSE	FALSE	static	-0.525731	-0.561601	-0.49594	0.0616327	-1.02939	0.967758	0.967758
chr1	65700001	65710000	-0.624867	-0.4815	-0.576302	-0.484924	-0.501739	-0.619134	-0.561394	-0.527338	-0.795881	-0.676933	-0.572886	-0.527929	-0.495135	-0.646743	-0.816069	-0.508819	-0.233056	-0.560015	-0.555212	-0.505883	-0.548384	-0.527599	-0.511696	-0.420174	0.290898	-0.0828995	FALSE	0.0916824	0.147297	FALSE	0.30276	0.0643973	FALSE	FALSE	static	-0.521246	-0.573366	-0.472326	0.0211096	-1.01039	0.989278	0.989278
chr1	65950001	65960000	-0.268485	-0.301743	-0.227815	-0.392051	-0.0267869	-0.186781	-0.296707	-0.178783	-0.391607	-0.362861	-0.206652	-0.441273	-0.394666	-0.501838	-0.32893	-0.251734	-0.48111	-0.1548	-0.487184	-0.412217	-0.466639	-0.45507	-0.387343	-0.39728	0.124797	-0.125051	FALSE	0.573487	-0.0452601	FALSE	0.0310468	-0.170312	FALSE	FALSE	static	-0.220419	-0.336984	-0.369725	1.1293	-0.356042	-0.773254	1.1293
chr1	65960001	65970000	-0.277377	-0.267703	-0.213921	-0.32676	0.0556606	-0.149261	-0.21359	-0.110237	-0.400303	-0.381556	-0.189922	-0.421902	-0.377908	-0.524332	-0.332025	-0.259983	-0.487947	-0.134336	-0.417362	-0.395268	-0.427319	-0.519192	-0.362912	-0.38481	0.0599802	-0.173093	FALSE	0.735598	-0.0301519	FALSE	0.0209388	-0.203245	FALSE	FALSE	static	-0.179666	-0.337826	-0.349325	1.15258	-0.515645	-0.63693	1.15258
chr1	66250001	66260000	-1.26965	-1.02783	-1.31326	-1.1874	-1.09974	-0.988507	-0.884228	-0.965117	-0.915776	-0.878041	-0.985358	-0.93423	-0.887201	-0.929172	-1.02245	-1.14864	-0.645302	-0.750261	-0.68999	-0.735666	-0.74087	-0.770736	-0.891968	-0.705066	0.196448	0.129357	FALSE	0.00226679	0.221376	TRUE	0.00241919	0.350734	TRUE	TRUE	up.late	-1.09572	-0.916991	-0.725875	-0.988653	-0.0223207	1.01097	1.01097
chr1	66260001	66270000	-0.914911	-0.748224	-0.99532	-0.831058	-0.79977	-0.733473	-0.666903	-0.758542	-0.666751	-0.572594	-0.742578	-0.617096	-0.562028	-0.713004	-0.706157	-0.872296	-0.435881	-0.513699	-0.441338	-0.586138	-0.538976	-0.521139	-0.711556	-0.524237	0.129384	0.124462	FALSE	0.0398938	0.147443	FALSE	0.00152938	0.271905	TRUE	TRUE	up.early	-0.802521	-0.641859	-0.515087	-1.0369	0.0784201	0.958481	0.958481
chr1	66450001	66460000	-0.461451	-0.197073	-0.404543	-0.423437	-0.538762	-0.196763	-0.440163	-0.221412	-0.334121	-0.362757	-0.485748	-0.311088	-0.32328	-0.585786	-0.3591	-0.512945	-0.342555	-0.466477	-0.50017	-0.26383	-0.372903	-0.510043	-0.475387	-0.415023	0.626569	-0.0489026	FALSE	0.915303	-0.00894531	FALSE	0.476719	-0.0578479	FALSE	FALSE	static	-0.349039	-0.37596	-0.405543	0.983934	0.031393	-1.01533	0.983934
chr1	66750001	66760000	-0.621315	-0.457334	-0.481444	-0.531372	-0.685898	-0.462092	-0.543979	-0.421684	-0.454393	-0.872923	-0.707621	-0.445675	-0.393548	-0.520936	-0.559944	-0.84956	-0.493544	-0.145447	-0.36031	-0.265827	-0.313725	-0.413133	-0.380188	-0.276978	0.532565	-0.0749351	FALSE	0.0274466	0.269431	FALSE	0.0106594	0.194496	FALSE	FALSE	static	-0.487732	-0.531247	-0.323771	-0.366957	-0.764681	1.13164	1.13164
chr1	66760001	66770000	-0.489812	-0.344587	-0.376917	-0.402084	-0.542611	-0.371858	-0.489063	-0.407812	-0.328321	-0.733838	-0.580181	-0.393327	-0.308289	-0.405832	-0.452649	-0.731439	-0.436429	-0.0974959	-0.263564	-0.155024	-0.210041	-0.312224	-0.294474	-0.183307	0.555357	-0.0636417	FALSE	0.0278276	0.247665	FALSE	0.0105441	0.184023	FALSE	FALSE	static	-0.380897	-0.42291	-0.235036	-0.351058	-0.777135	1.12819	1.12819
chr1	66990001	67000000	-0.23612	-0.26385	-0.360851	-0.16507	-0.253647	-0.189824	0.0693043	-0.267838	-0.0839065	-0.173668	-0.117787	-0.311909	-0.113499	-0.12423	-0.165952	-0.31039	-0.152081	-0.118592	-0.154443	-0.027206	-0.22027	-0.192363	-0.417552	-0.160892	0.723511	0.0333192	FALSE	0.954013	-0.00525704	FALSE	0.758714	0.0280622	FALSE	FALSE	static	-0.198822	-0.122781	-0.135439	-1.14068	0.725678	0.415007	0.725678
chr1	67160001	67170000	-0.214371	-0.200401	-0.218905	-0.20583	-0.111067	-0.245422	-0.00896245	-0.11209	-0.195151	-0.155164	-0.113697	-0.195871	-0.264587	-0.144915	-0.00986164	-0.103513	0.0652654	-0.0615014	-0.289005	6.13928e-06	-0.375986	-0.0211855	-0.0364142	-0.041512	0.811718	0.0167861	FALSE	0.582083	0.0528034	FALSE	0.427303	0.0695895	FALSE	FALSE	static	-0.156668	-0.124549	-0.0709976	-0.907197	-0.165065	1.07226	1.07226
chr1	67170001	67180000	-0.244304	-0.176077	-0.213318	-0.137744	-0.104546	-0.20134	-0.0788062	-0.136168	-0.187963	-0.185287	-0.111187	-0.166343	-0.289234	-0.126118	-0.0679765	-0.117171	0.152132	-0.0277875	-0.244214	0.0988971	-0.261537	-0.0451174	0.0542841	-0.0089821	0.93171	0.0051278	FALSE	0.169073	0.121119	FALSE	0.128607	0.126247	FALSE	FALSE	static	-0.145457	-0.130074	-0.0155498	-0.682317	-0.465584	1.1479	1.1479
chr1	67500001	67510000	-0.815484	-0.879063	-0.828169	-1.07538	-0.396517	-0.469102	-0.626578	-0.671656	-0.697368	-0.733541	-0.891566	-0.732872	-0.638243	-0.60972	-0.575392	-0.694673	-0.571221	-0.651461	-0.707652	-0.648965	-0.606635	-0.5966	-0.632837	-0.707116	0.885559	0.0235716	FALSE	0.332887	0.0563609	FALSE	0.503267	0.0799325	FALSE	FALSE	static	-0.711922	-0.655585	-0.635975	-1.11842	0.310517	0.807905	0.807905
chr1	67510001	67520000	-1.04987	-1.07697	-1.00884	-1.1789	-0.554148	-0.604264	-0.693737	-0.831491	-0.810911	-0.884906	-1.07384	-0.907842	-0.856751	-0.678619	-0.688387	-0.841748	-0.719598	-0.836638	-0.902072	-0.785823	-0.725056	-0.701918	-0.816727	-0.816911	0.853633	0.0319018	FALSE	0.486549	0.0547822	FALSE	0.497742	0.0866839	FALSE	FALSE	static	-0.873363	-0.793696	-0.78209	-1.1468	0.45661	0.690188	0.690188
chr1	67520001	67530000	-1.0925	-1.132	-0.969438	-1.21794	-0.664068	-0.590838	-0.710278	-0.931585	-0.792363	-0.890147	-1.03974	-0.867932	-0.864267	-0.637629	-0.642055	-0.828403	-0.768264	-0.843308	-0.920379	-0.766153	-0.741931	-0.710614	-0.812886	-0.840092	0.550671	0.0932633	FALSE	0.824729	0.0198642	FALSE	0.366776	0.113127	FALSE	FALSE	static	-0.90326	-0.770281	-0.793738	-1.13883	0.734653	0.404175	0.734653
chr1	67760001	67770000	-0.103908	-0.262513	-0.234311	-0.0500508	-0.483446	-0.0668488	-0.0248433	-0.219128	-0.10287	-0.0802258	0.0982686	-0.0695	-0.180716	-0.196243	-0.176018	-0.0310568	-0.294799	-0.206983	-0.156459	-0.221235	-0.566621	-0.4621	-0.237183	-0.394843	0.384849	0.0883361	FALSE	0.0210855	-0.225233	FALSE	0.182664	-0.136897	FALSE	FALSE	static	-0.11751	-0.0662394	-0.279691	0.331797	0.791929	-1.12373	0.791929
chr1	67770001	67780000	-0.0118036	-0.118216	-0.178902	0.0211532	-0.351589	-0.0225214	0.10853	-0.122526	-0.0580667	0.0119801	0.124532	0.00695392	-0.0828145	-0.112389	-0.0584324	0.0422703	-0.217976	-0.119155	-0.0978091	-0.146664	-0.422014	-0.368313	-0.158149	-0.33069	0.455172	0.0687385	FALSE	0.012185	-0.216851	FALSE	0.111586	-0.148112	FALSE	FALSE	static	-0.0303457	0.00458135	-0.196448	0.407082	0.732254	-1.13934	0.732254
chr1	67850001	67860000	-0.764567	-0.99714	-0.955126	-0.835728	-0.578933	-0.612682	-0.686951	-0.751439	-0.849113	-0.631378	-0.688981	-0.830478	-0.774277	-0.513556	-0.875155	-0.792916	-0.445071	-0.396673	-0.615317	-0.419787	-0.489761	-0.474539	-0.522667	-0.614847	0.820146	0.0283392	FALSE	0.00638903	0.247149	TRUE	0.00744682	0.275488	TRUE	TRUE	up.late	-0.783625	-0.729046	-0.477901	-0.73657	-0.401844	1.13841	1.13841
chr1	68110001	68120000	-0.824827	-0.971825	-0.994926	-0.95492	-0.661919	-0.649716	-0.761389	-0.435901	-0.85752	-0.801023	-0.743952	-0.77743	-0.68171	-0.793708	-0.969078	-0.868541	-0.758628	-0.601342	-0.685004	-0.434102	-0.822071	-0.678921	-0.682775	-0.612629	0.82913	-0.0296924	FALSE	0.0500956	0.152186	FALSE	0.279014	0.122494	FALSE	FALSE	static	-0.798538	-0.781391	-0.628021	-0.666254	-0.483622	1.14988	1.14988
chr1	68120001	68130000	-0.813929	-0.877675	-0.906445	-0.917173	-0.60299	-0.589516	-0.814021	-0.419053	-0.797191	-0.736375	-0.611174	-0.777709	-0.682102	-0.73411	-0.86457	-0.746842	-0.652884	-0.528268	-0.569131	-0.44309	-0.683637	-0.664079	-0.644849	-0.549925	0.992734	-0.00115887	FALSE	0.0156357	0.151776	FALSE	0.141923	0.150617	FALSE	FALSE	static	-0.756699	-0.713666	-0.573556	-0.787271	-0.337907	1.12518	1.12518
chr1	68380001	68390000	-0.27632	-0.257324	-0.320611	-0.382688	-0.323597	-0.308294	-0.335805	-0.1934	-0.463514	-0.274575	-0.253985	-0.273742	-0.542798	-0.355891	-0.311381	-0.34723	-0.268275	-0.235768	-0.278622	-0.24052	-0.487463	-0.287034	-0.305016	-0.411372	0.421771	-0.0531347	FALSE	0.60754	0.0386308	FALSE	0.802639	-0.0145039	FALSE	FALSE	static	-0.285352	-0.333777	-0.327937	1.14763	-0.684282	-0.463352	1.14763
chr1	68390001	68400000	-0.231121	-0.170167	-0.289569	-0.391834	-0.285813	-0.349514	-0.316935	-0.109817	-0.425149	-0.251678	-0.244321	-0.248956	-0.50876	-0.294616	-0.313953	-0.306883	-0.236832	-0.207096	-0.305918	-0.265533	-0.491705	-0.335218	-0.313523	-0.363317	0.453512	-0.0561933	FALSE	0.907041	0.00939675	FALSE	0.469757	-0.0467965	FALSE	FALSE	static	-0.251858	-0.3055	-0.328747	1.10339	-0.256923	-0.846471	1.10339
chr1	68490001	68500000	-0.610188	-0.62109	-0.560616	-1.02366	-0.561511	-1.02301	-0.789404	-0.709134	-0.423057	-0.557575	-0.642051	-0.523307	-0.589981	-0.552622	-0.807926	-0.582105	-0.337885	-0.277582	-0.577752	-0.327345	-0.320365	-0.350389	-0.486749	-0.528681	0.222714	0.152499	FALSE	0.0304903	0.183985	FALSE	0.00942968	0.336484	TRUE	TRUE	up.late	-0.646047	-0.514809	-0.379537	-0.994916	-0.0100907	1.00501	1.00501
chr1	68500001	68510000	-0.507097	-0.527399	-0.481559	-0.934036	-0.527719	-0.922594	-0.574995	-0.63	-0.434997	-0.451025	-0.588794	-0.460718	-0.612415	-0.472936	-0.723942	-0.484182	-0.293817	-0.176707	-0.535953	-0.207187	-0.218633	-0.271077	-0.391925	-0.435001	0.355706	0.109549	FALSE	0.0187583	0.212339	FALSE	0.0105441	0.321887	FALSE	FALSE	static	-0.549214	-0.453714	-0.290977	-0.903062	-0.171653	1.07472	1.07472
chr1	69740001	69750000	-0.429958	-0.664434	-0.448188	-0.510837	-0.322835	-0.41565	-0.162168	-0.663351	-0.520822	-0.643495	-0.650775	-0.579056	-0.558496	-0.60068	-0.402199	-0.673118	-0.587308	-0.456625	-0.58166	-0.443373	-0.625002	-0.625427	-0.499181	-0.591526	0.237311	-0.126402	FALSE	0.674041	0.0273173	FALSE	0.284129	-0.0990851	FALSE	FALSE	static	-0.414899	-0.558949	-0.547392	1.15169	-0.648034	-0.503653	1.15169
chr1	69750001	69760000	-0.447763	-0.615454	-0.448312	-0.533004	-0.253524	-0.457141	-0.15017	-0.596072	-0.478145	-0.564132	-0.543584	-0.532242	-0.517768	-0.637237	-0.322171	-0.718581	-0.659131	-0.387418	-0.571224	-0.396678	-0.636846	-0.558125	-0.474743	-0.528666	0.358955	-0.101552	FALSE	0.894096	0.0126287	FALSE	0.351928	-0.0889238	FALSE	FALSE	static	-0.405856	-0.513029	-0.52136	1.15228	-0.511478	-0.640806	1.15228
chr1	70020001	70030000	-0.181995	-0.258572	-0.110904	-0.203066	0.00864787	-0.0503038	0.0306012	0.0619046	-0.240033	-0.168849	-0.188362	-0.153626	-0.424307	-0.320809	-0.378143	-0.302538	-0.132203	0.0386618	-0.200136	-0.172319	-0.0678619	-0.0774635	0.0927215	-0.213216	0.0457776	-0.184123	FALSE	0.0264792	0.180607	FALSE	0.971351	-0.00351614	FALSE	FALSE	static	-0.100018	-0.21546	-0.0601979	0.312581	-1.11895	0.806372	0.806372
chr1	70110001	70120000	-0.375461	-0.469622	-0.406727	-0.369461	-0.100575	-0.0414412	-0.166161	-0.218714	-0.185847	-0.250236	-0.251441	0.0229062	-0.22318	-0.15791	-0.150114	-0.115512	-0.339666	-0.19886	-0.211299	-0.244222	-0.181021	-0.261777	-0.165973	-0.337602	0.303812	0.104604	FALSE	0.177295	-0.0786359	FALSE	0.782753	0.0259676	FALSE	FALSE	static	-0.288149	-0.144336	-0.211151	-1.02275	0.975581	0.0471685	0.975581
chr1	70120001	70130000	-0.434608	-0.609419	-0.467998	-0.486044	-0.24978	-0.159413	-0.271263	-0.301603	-0.245783	-0.352311	-0.334792	-0.0955738	-0.29786	-0.272721	-0.256159	-0.152517	-0.37211	-0.169326	-0.224256	-0.312866	-0.227721	-0.314571	-0.250236	-0.364265	0.214479	0.121551	FALSE	0.657942	-0.0284542	FALSE	0.268172	0.0930971	FALSE	FALSE	static	-0.388486	-0.232589	-0.245877	-1.15128	0.652518	0.498766	0.652518
chr1	70510001	70520000	-0.776031	-0.668864	-0.769896	-0.674497	-0.45629	-0.531955	-0.307722	-0.541692	-0.592417	-0.544454	-0.72655	-0.554443	-0.683739	-0.50023	-0.739248	-0.627048	-0.5873	-0.656063	-0.596916	-0.624322	-0.744257	-0.8365	-0.493045	-0.585469	0.797182	-0.0301478	FALSE	0.812764	-0.0194679	FALSE	0.622932	-0.0496157	FALSE	FALSE	static	-0.606692	-0.596663	-0.579243	-0.899427	-0.177402	1.07683	1.07683
chr1	70520001	70530000	-0.820584	-0.710059	-0.828553	-0.687859	-0.473818	-0.581399	-0.333935	-0.583056	-0.672647	-0.565946	-0.793758	-0.622128	-0.636292	-0.537714	-0.758408	-0.686995	-0.607429	-0.636297	-0.593724	-0.683564	-0.716598	-0.833802	-0.541415	-0.602682	0.793464	-0.0318283	FALSE	0.925438	0.00729718	FALSE	0.818875	-0.0245311	FALSE	FALSE	static	-0.645695	-0.638306	-0.595687	-0.708782	-0.435052	1.14383	1.14383
chr1	71050001	71060000	-1.24151	-1.16094	-1.26974	-1.17209	-0.821015	-1.16967	-1.24956	-1.02267	-0.905423	-1.11537	-1.08249	-1.06239	-1.25834	-0.921346	-1.35055	-0.972194	-0.928243	-0.752609	-0.945012	-0.746342	-0.929	-0.928331	-1.04665	-0.949819	0.674193	0.0548844	FALSE	0.0730815	0.180263	FALSE	0.017326	0.235147	FALSE	FALSE	static	-1.12756	-1.03774	-0.900543	-0.923748	-0.138141	1.06189	1.06189
chr1	71070001	71080000	-1.46069	-1.36572	-1.38191	-1.39993	-0.876373	-1.42035	-1.34299	-1.14994	-1.1084	-1.1486	-1.28621	-1.24653	-1.2543	-1.0095	-1.5013	-1.22743	-0.918252	-0.930887	-1.12063	-0.772509	-1.04169	-1.02924	-1.11887	-1.06122	0.586163	0.0769514	FALSE	0.0284223	0.223622	FALSE	0.017193	0.300574	FALSE	FALSE	static	-1.29795	-1.18119	-0.998391	-0.919101	-0.145792	1.06489	1.06489
chr1	71080001	71090000	-1.36691	-1.3688	-1.36947	-1.41825	-0.771273	-1.32879	-1.19794	-1.06096	-1.20621	-1.12676	-1.33378	-1.28368	-1.19932	-1.06886	-1.50915	-1.29894	-0.940447	-0.970892	-1.0993	-0.74369	-1.03675	-1.05503	-1.09028	-1.09054	0.91794	-0.018038	FALSE	0.0141298	0.249971	FALSE	0.0744254	0.231933	FALSE	FALSE	static	-1.24598	-1.21428	-1.00546	-0.694385	-0.451789	1.14617	1.14617
chr1	71200001	71210000	-0.441172	-0.327428	-0.476263	-0.379761	-0.304213	-0.371993	-0.38588	-0.109438	-0.340611	-0.389167	-0.486793	-0.318805	-0.195437	-0.43004	-0.222749	-0.264379	-0.0708647	-0.185614	-0.28051	-0.130792	-0.255806	-0.241405	-0.27226	-0.236313	0.848093	0.018521	FALSE	0.068534	0.121802	FALSE	0.043981	0.140323	FALSE	FALSE	static	-0.347224	-0.323225	-0.20504	-0.727781	-0.41248	1.14026	1.14026
chr1	71520001	71530000	-0.498775	-0.455786	-0.54826	-0.49406	-0.335386	-0.413815	-0.252568	-0.642124	-0.415149	-0.423024	-0.371568	-0.515577	-0.58789	-0.458594	-0.578299	-0.583702	-0.262408	-0.51616	-0.509404	-0.448028	-0.426618	-0.536942	-0.406558	-0.49105	0.682917	-0.0366286	FALSE	0.535138	0.0420793	FALSE	0.951133	0.00545074	FALSE	FALSE	static	-0.422339	-0.447119	-0.438451	1.08396	-0.886619	-0.197339	1.08396
chr1	71530001	71540000	-0.529287	-0.517817	-0.547799	-0.590387	-0.335979	-0.470436	-0.37802	-0.581239	-0.512899	-0.450077	-0.390662	-0.550118	-0.631359	-0.438298	-0.590391	-0.459309	-0.251841	-0.477045	-0.529011	-0.485029	-0.433417	-0.491534	-0.398036	-0.533761	0.915143	-0.00901883	FALSE	0.423134	0.0529301	FALSE	0.50737	0.0439112	FALSE	FALSE	static	-0.475914	-0.469043	-0.438795	-0.742505	-0.39459	1.1371	1.1371
chr1	71800001	71810000	-0.198578	-0.343678	-0.117861	-0.162457	0.0305615	-0.00252531	0.0677438	0.056361	-0.158104	-0.285648	-0.347081	-0.244842	-0.461557	-0.43838	-0.260877	-0.304681	-0.410198	-0.120055	-0.188543	-0.175754	-0.307054	-0.403892	-0.1222	-0.277593	0.0366711	-0.228842	FALSE	0.455112	0.0619848	FALSE	0.075569	-0.166857	FALSE	FALSE	static	-0.0809455	-0.269242	-0.23729	1.14009	-0.728597	-0.411498	1.14009
chr1	71810001	71820000	-0.189449	-0.325442	-0.157425	-0.173706	0.0426583	-0.0225648	0.0303401	0.129351	-0.224987	-0.344235	-0.353746	-0.238609	-0.41639	-0.41367	-0.304845	-0.251707	-0.267898	-0.079434	-0.203016	-0.00628885	-0.243316	-0.254848	-0.0370462	-0.251931	0.0334506	-0.235244	FALSE	0.0374821	0.150551	FALSE	0.364097	-0.0846924	FALSE	FALSE	static	-0.0861776	-0.288118	-0.158765	0.894596	-1.07957	0.184978	0.894596
chr1	72060001	72070000	-0.490453	-0.489495	-0.62511	-0.299365	-0.467029	-0.111326	-0.213662	-0.228328	-0.579637	-0.298839	-0.597927	-0.54151	-0.629201	-0.669455	-0.581822	-0.652049	0.14883	0.166956	0.208162	0.162453	0.268679	0.0774428	0.163092	0.0613086	0.09772	-0.203209	FALSE	8.7396e-06	0.72592	TRUE	0.000850713	0.522711	TRUE	TRUE	down.early	-0.372767	-0.648072	0.170254	-0.214311	-0.87547	1.08978	1.08978
chr1	72070001	72080000	-0.43112	-0.48588	-0.526697	-0.248629	-0.375544	-0.120445	-0.212272	-0.19516	-0.454267	-0.280261	-0.639548	-0.555829	-0.686353	-0.576911	-0.49688	-0.571475	0.146015	0.23207	0.17681	0.241803	0.297275	0.104901	0.221619	0.0749449	0.0661864	-0.208222	FALSE	1.23117e-05	0.71962	TRUE	0.000278037	0.511398	TRUE	TRUE	down.early	-0.328031	-0.671331	0.20493	-0.143183	-0.920691	1.06387	1.06387
chr1	72080001	72090000	-0.390304	-0.436769	-0.411326	-0.224668	-0.318403	-0.102623	-0.24578	-0.172341	-0.343018	-0.247379	-0.616996	-0.500754	-0.616386	-0.556108	-0.372525	-0.415105	0.0475859	0.290093	0.0998758	0.308812	0.327687	0.154337	0.247628	0.0932264	0.09772	-0.170757	FALSE	2.4731e-05	0.654689	TRUE	9.32022e-05	0.483932	TRUE	TRUE	down.early	-0.283889	-0.562147	0.22364	-0.191812	-0.890201	1.08201	1.08201
chr1	72180001	72190000	-0.561505	-0.476164	-0.312965	-0.442072	-0.263419	-0.493205	-0.296045	-0.534123	-0.349432	-0.586625	-0.414903	-0.531311	-0.279994	-0.658652	-0.216746	-0.568859	-0.438208	-0.456413	-0.605578	-0.163588	-0.532075	-0.371355	-0.4272	-0.545849	0.821248	-0.028378	FALSE	0.950246	0.00828189	FALSE	0.838883	-0.0200961	FALSE	FALSE	static	-0.398206	-0.404938	-0.427409	0.783312	0.343066	-1.12638	0.783312
chr1	72300001	72310000	-0.0548853	-0.288969	-0.103344	-0.13354	-0.125756	-0.0181913	-0.00278867	-0.0359046	-0.248866	-0.461395	-0.141889	-0.256038	-0.422209	-0.175954	-0.547299	-0.59388	-0.0723116	-0.132388	-0.0610326	0.0829018	-0.185266	-0.154661	-0.0544306	0.00950565	0.0369886	-0.260519	FALSE	0.0147943	0.284981	FALSE	0.719128	0.0244621	FALSE	FALSE	static	-0.0805408	-0.30279	-0.0494675	0.461235	-1.14738	0.686141	0.686141
chr1	72310001	72320000	0.128238	-0.149607	0.0211274	0.0398135	-0.00480444	0.0550451	0.117321	0.0584107	-0.106374	-0.277029	0.0206062	-0.0524896	-0.210284	0.0105484	-0.392168	-0.31057	-1.40293e-05	0.00506205	0.00681883	0.156981	-0.0889247	-0.110222	0.0427089	0.0769406	0.0649911	-0.197913	FALSE	0.0687447	0.175889	FALSE	0.735447	-0.022024	FALSE	FALSE	static	0.0554563	-0.120274	0.0295538	0.708463	-1.14389	0.435427	0.708463
chr1	72590001	72600000	-0.405744	-0.386022	-0.425063	-0.419539	-0.56255	-0.32596	-0.413701	-0.433248	-0.276631	-0.384758	-0.165955	-0.253916	-0.426963	-0.691945	-0.620044	-0.443283	-0.581101	-0.359485	-0.508707	-0.458437	-0.413599	-0.444015	-0.388653	-0.451618	0.91713	0.0135416	FALSE	0.701602	-0.0427651	FALSE	0.5502	-0.0292236	FALSE	FALSE	static	-0.381677	-0.36646	-0.428425	0.325478	0.796713	-1.12219	0.796713
chr1	72600001	72610000	-0.503031	-0.399874	-0.49046	-0.5105	-0.580408	-0.371832	-0.393147	-0.486781	-0.34493	-0.451299	-0.177856	-0.303093	-0.459038	-0.703345	-0.759188	-0.426533	-0.558539	-0.337049	-0.477711	-0.45116	-0.44652	-0.441573	-0.417359	-0.471245	0.922137	0.0138438	FALSE	0.983591	0.00301571	FALSE	0.740201	0.0168595	FALSE	FALSE	static	-0.435189	-0.416336	-0.43211	-0.722858	1.14124	-0.418383	1.14124
chr1	72620001	72630000	-0.595354	-0.432771	-0.569759	-0.579813	-0.561309	-0.31385	-0.319524	-0.392242	-0.486358	-0.453034	-0.324018	-0.380414	-0.515672	-0.618037	-0.874025	-0.481	-0.368809	-0.259615	-0.418226	-0.400111	-0.489057	-0.394097	-0.460882	-0.445181	0.71512	-0.0459921	FALSE	0.253139	0.112073	FALSE	0.34292	0.0660805	FALSE	FALSE	static	-0.464727	-0.487807	-0.400253	-0.304064	-0.812675	1.11674	1.11674
chr1	72640001	72650000	-0.567405	-0.437286	-0.527802	-0.612526	-0.395356	-0.150283	-0.162932	-0.151307	-0.56717	-0.472933	-0.442549	-0.473296	-0.501054	-0.504096	-0.93184	-0.451863	-0.288567	-0.299722	-0.310992	-0.339263	-0.46694	-0.359674	-0.421337	-0.437191	0.232954	-0.167488	FALSE	0.0706149	0.17764	FALSE	0.933858	0.0101515	FALSE	FALSE	static	-0.406823	-0.52662	-0.364339	0.306236	-1.11731	0.811073	0.811073
chr1	72650001	72660000	-0.46502	-0.392599	-0.447134	-0.539335	-0.270105	-0.0402533	-0.178026	-0.0602805	-0.528922	-0.445144	-0.509585	-0.479575	-0.471938	-0.445871	-0.846685	-0.438541	-0.252367	-0.345459	-0.292403	-0.2781	-0.42863	-0.355928	-0.379531	-0.38915	0.0993397	-0.221688	FALSE	0.0359592	0.180586	FALSE	0.702821	-0.041102	FALSE	FALSE	static	-0.332102	-0.496211	-0.336642	0.601464	-1.15436	0.552896	0.601464
chr1	72900001	72910000	-0.128533	-0.0205949	-0.105461	-0.216279	0.00803495	-0.0230453	-0.33219	-0.0998971	-0.319676	-0.365749	-0.175302	-0.180467	-0.292878	-0.263872	-0.316664	-0.440608	-0.215291	-0.0111297	-0.136429	-0.309594	-0.220609	-0.167261	-0.164921	-0.136867	0.0390048	-0.179657	FALSE	0.0572842	0.124139	FALSE	0.438495	-0.0555171	FALSE	FALSE	static	-0.0791368	-0.470287	-0.144402	0.726037	-1.14061	0.414576	0.726037
chr1	72910001	72920000	-0.11392	0.028919	-0.0470103	-0.157962	-0.112369	-0.000341335	-0.204644	-0.111392	-0.295449	-0.262913	-0.108225	-0.191362	-0.311459	-0.253177	-0.284617	-0.327353	-0.291799	-0.0854598	-0.176217	-0.380111	-0.245484	-0.133583	-0.194844	-0.0799182	0.0150807	-0.164479	FALSE	0.408997	0.0558924	FALSE	0.0945966	-0.108587	FALSE	FALSE	static	-0.0436202	-0.368357	-0.153216	0.876364	-1.08933	0.212963	0.876364
chr1	73120001	73130000	-0.465704	-0.430508	-0.571066	-0.441024	-0.22039	-0.404237	-0.274652	-0.254732	-0.380548	-0.35728	-0.275551	-0.220692	-0.360304	-0.0747392	-0.222533	-0.477618	-0.315847	-0.0840879	-0.313482	-0.0990427	-0.299354	-0.367686	-0.25629	-0.269017	0.368306	0.0866308	FALSE	0.614081	0.0455576	FALSE	0.0948722	0.132188	FALSE	FALSE	static	-0.378446	-0.272129	-0.23952	-1.12524	0.338191	0.787053	0.787053
chr1	73130001	73140000	-0.357871	-0.428455	-0.525963	-0.386732	-0.143526	-0.265815	-0.358905	-0.208328	-0.354377	-0.333572	-0.27616	-0.229093	-0.332556	0.00933684	-0.226816	-0.505698	-0.273609	-0.0744501	-0.320402	-0.13207	-0.285321	-0.364912	-0.248884	-0.300928	0.64041	0.0533323	FALSE	0.765941	0.031045	FALSE	0.27867	0.0843773	FALSE	FALSE	static	-0.329805	-0.256983	-0.240106	-1.13646	0.391205	0.745259	0.745259
chr1	74000001	74010000	-0.365997	-0.371497	-0.475735	-0.372969	-0.211592	-0.308411	-0.103947	-0.36356	-0.258914	-0.356418	-0.38679	-0.347567	-0.171019	-0.336061	-0.526117	-0.29988	-0.202328	-0.350421	-0.296565	-0.31459	-0.484562	-0.243577	-0.291393	-0.337428	0.895547	-0.0136321	FALSE	0.797226	0.0202377	FALSE	0.936726	0.00660566	FALSE	FALSE	static	-0.318082	-0.313858	-0.3096	-0.998669	-0.0026567	1.00133	1.00133
chr1	74010001	74020000	-0.366045	-0.332323	-0.481279	-0.380626	-0.200604	-0.332415	-0.162007	-0.359264	-0.269958	-0.360367	-0.365753	-0.366285	-0.157726	-0.400713	-0.569359	-0.434081	-0.21807	-0.326866	-0.366666	-0.347572	-0.529027	-0.268951	-0.269744	-0.385653	0.681357	-0.0387102	FALSE	0.768801	0.0264617	FALSE	0.87583	-0.0122485	FALSE	FALSE	static	-0.320014	-0.332037	-0.332246	1.15457	-0.562369	-0.592203	1.15457
chr1	74470001	74480000	-0.432751	-0.316044	-0.440581	-0.358125	-0.0559588	-0.283517	-0.292664	-0.109238	-0.294961	-0.401112	-0.27072	-0.213913	-0.284711	-0.161045	-0.352199	-0.190553	-0.345872	-0.221039	-0.388444	-0.25728	-0.390763	-0.359428	-0.415378	-0.370862	0.889858	0.0149584	FALSE	0.187313	-0.0724817	FALSE	0.468298	-0.0575232	FALSE	FALSE	static	-0.293451	-0.25955	-0.345225	0.138075	0.923787	-1.06186	0.923787
chr1	74490001	74500000	-0.474542	-0.365567	-0.441587	-0.335291	-0.0842439	-0.424193	-0.463987	-0.0956442	-0.234052	-0.51124	-0.350362	-0.189396	-0.322341	-0.26704	-0.364673	-0.279153	-0.287889	-0.197128	-0.266196	-0.291092	-0.435979	-0.358498	-0.292805	-0.248214	0.8622	0.0208497	FALSE	0.809203	0.0175571	FALSE	0.679507	0.0384068	FALSE	FALSE	static	-0.33621	-0.295965	-0.301276	-1.14615	0.694531	0.451621	0.694531
chr1	74690001	74700000	-0.570582	-0.48958	-0.546359	-0.520591	-0.597189	-0.428329	-0.363904	-0.506017	-0.765894	-0.44622	-0.662323	-0.487094	-0.575745	-0.664176	-0.732696	-0.586599	-0.648845	-0.395079	-0.278647	-0.371037	-0.376838	-0.439755	-0.388906	-0.417366	0.144301	-0.112275	FALSE	0.0185875	0.200534	FALSE	0.171707	0.0882596	FALSE	FALSE	static	-0.488617	-0.576216	-0.400043	-0.00369325	-0.998148	1.00184	1.00184
chr1	74700001	74710000	-0.732681	-0.63932	-0.737973	-0.71947	-0.727869	-0.543262	-0.489591	-0.603992	-0.800512	-0.555718	-0.767327	-0.595018	-0.665396	-0.905885	-0.828241	-0.725064	-0.769018	-0.513139	-0.342883	-0.489465	-0.513216	-0.548115	-0.517345	-0.557065	0.338965	-0.0811254	FALSE	0.0277005	0.199114	FALSE	0.115101	0.117989	FALSE	FALSE	static	-0.643373	-0.678364	-0.515713	-0.360814	-0.769519	1.13033	1.13033
chr1	74740001	74750000	-1.0782	-0.947397	-0.940079	-0.853838	-0.885816	-1.01058	-1.05431	-0.831386	-0.79416	-0.839575	-0.757142	-0.870303	-0.770534	-1.20707	-0.854779	-0.86805	-0.80227	-0.903851	-0.58339	-0.75431	-0.773702	-0.751196	-0.720559	-0.989362	0.401767	0.0799993	FALSE	0.390555	0.0853724	FALSE	0.0357058	0.165372	FALSE	FALSE	static	-0.92504	-0.798515	-0.747985	-1.10951	0.277745	0.831768	0.831768
chr1	74750001	74760000	-1.02173	-0.906541	-0.828678	-0.771694	-0.880899	-1.01029	-1.02385	-0.836856	-0.821206	-0.772702	-0.696201	-0.952392	-0.684471	-1.14368	-0.816628	-0.799938	-0.696423	-0.901476	-0.573806	-0.714934	-0.730555	-0.768305	-0.689828	-0.915037	0.465609	0.0741658	FALSE	0.381189	0.0871068	FALSE	0.0359749	0.161273	FALSE	FALSE	static	-0.876426	-0.763319	-0.717188	-1.108	0.272483	0.835517	0.835517
chr1	75200001	75210000	-0.472111	-0.794023	-0.806891	-0.712514	-0.317205	-0.544035	-0.59977	-0.544185	-0.603397	-0.632693	-0.414935	-0.448212	-0.557299	-0.444956	-0.700525	-0.753501	-0.644543	-0.695515	-0.668722	-0.725261	-0.615694	-0.839519	-0.710248	-0.59669	0.826198	0.0294023	FALSE	0.131318	-0.117585	FALSE	0.34324	-0.0881823	FALSE	FALSE	static	-0.599767	-0.534116	-0.676313	0.05103	0.973508	-1.02454	0.973508
chr1	75210001	75220000	-0.513767	-0.829983	-0.865452	-0.732511	-0.310708	-0.688356	-0.60973	-0.620422	-0.61881	-0.636505	-0.47688	-0.460256	-0.545361	-0.560434	-0.688787	-0.764293	-0.698044	-0.794498	-0.656582	-0.709035	-0.651022	-0.871517	-0.756059	-0.654361	0.674369	0.0524502	FALSE	0.0607427	-0.129974	FALSE	0.436844	-0.0775241	FALSE	FALSE	static	-0.642125	-0.558627	-0.713461	-0.0523106	1.02513	-0.972818	1.02513
chr1	75220001	75230000	-0.533135	-0.787202	-0.82463	-0.680907	-0.245844	-0.781832	-0.594542	-0.64825	-0.590989	-0.57211	-0.508845	-0.412776	-0.497009	-0.636545	-0.624871	-0.683691	-0.683051	-0.75732	-0.625592	-0.683188	-0.690491	-0.814362	-0.740302	-0.618321	0.556365	0.0711883	FALSE	0.0256535	-0.135724	FALSE	0.530814	-0.0645358	FALSE	FALSE	static	-0.626149	-0.530783	-0.691245	-0.125019	1.05663	-0.931612	1.05663
chr1	75640001	75650000	-0.4142	-0.281826	-0.154973	-0.142231	-0.126852	-0.0333584	-0.196073	-0.315398	-0.111491	-0.285117	-0.322573	-0.264548	-0.190377	-0.152549	-0.110586	-0.312095	-0.0193231	-0.104312	0.0199834	-0.0496985	-0.157162	-0.148736	-0.141092	-0.16189	0.916814	-0.0105529	FALSE	0.0416085	0.123388	FALSE	0.112434	0.112835	FALSE	FALSE	static	-0.193683	-0.182866	-0.0852766	-0.665551	-0.484403	1.14995	1.14995
chr1	75650001	75660000	-0.338167	-0.288397	-0.0917059	-0.100357	-0.077084	0.0375895	-0.176455	-0.236161	-0.0807515	-0.31029	-0.269206	-0.127025	-0.125852	-0.142541	-0.11135	-0.325679	0.0160694	0.0446375	0.122746	0.0163067	-0.0833449	-0.0817791	-0.0141984	-0.0388745	0.780036	-0.0277446	FALSE	0.00911681	0.184282	TRUE	0.0389755	0.156538	FALSE	TRUE	up.late	-0.141298	-0.15339	0.00694167	-0.508304	-0.643746	1.15205	1.15205
chr1	75780001	75790000	-0.457123	-0.262144	-0.305001	-0.548994	-0.410216	-0.256748	-0.348394	-0.389648	-0.28495	-0.487029	-0.236269	-0.471587	-0.243326	-0.670987	-0.311318	-0.525874	-0.384916	-0.420971	-0.261312	-0.44265	-0.314962	-0.450057	-0.372517	-0.469694	0.788934	-0.0316341	FALSE	0.894751	0.0142825	FALSE	0.797797	-0.0173516	FALSE	FALSE	static	-0.331477	-0.358208	-0.37624	1.05815	-0.128768	-0.929378	1.05815
chr1	75800001	75810000	-0.723943	-0.502081	-0.548241	-0.843128	-0.570779	-0.47876	-0.551137	-0.568717	-0.557932	-0.671689	-0.476265	-0.631884	-0.318575	-0.920501	-0.595811	-0.641656	-0.412649	-0.601052	-0.330606	-0.425349	-0.511706	-0.499532	-0.500158	-0.665406	0.980028	-0.0034411	FALSE	0.309372	0.108482	FALSE	0.188555	0.105041	FALSE	FALSE	static	-0.565429	-0.564055	-0.493497	-0.593965	-0.560574	1.15454	1.15454
chr1	75810001	75820000	-0.753001	-0.516549	-0.559402	-0.91677	-0.501425	-0.517016	-0.457718	-0.452593	-0.528612	-0.695703	-0.537901	-0.680348	-0.306626	-0.889638	-0.556016	-0.526796	-0.377746	-0.492169	-0.405961	-0.336375	-0.498099	-0.45871	-0.427728	-0.687578	0.970449	-0.00589573	FALSE	0.216726	0.129659	FALSE	0.204067	0.123764	FALSE	FALSE	static	-0.557215	-0.566595	-0.470742	-0.486315	-0.663829	1.15014	1.15014
chr1	75820001	75830000	-0.677271	-0.427534	-0.521826	-0.871753	-0.462549	-0.497917	-0.31153	-0.308866	-0.502704	-0.621733	-0.512966	-0.652921	-0.272459	-0.732057	-0.492258	-0.435473	-0.314123	-0.372906	-0.46351	-0.234503	-0.410005	-0.381852	-0.326323	-0.675923	0.911393	-0.0179156	FALSE	0.19315	0.130428	FALSE	0.325149	0.112513	FALSE	FALSE	static	-0.48655	-0.516202	-0.411689	-0.279787	-0.830307	1.11009	1.11009
chr1	75890001	75900000	-0.147896	-0.233532	-0.199173	-0.16461	-0.00703195	0.0334154	0.201427	-0.282246	-0.249971	-0.234483	-0.179917	-0.211387	-0.370885	-0.279795	-0.241337	-0.567995	-0.356786	-0.214656	-0.710948	-0.239475	-0.250225	-0.290539	-0.339994	-0.234845	0.100222	-0.192016	FALSE	0.75135	-0.0377122	FALSE	0.0479608	-0.229728	FALSE	FALSE	static	-0.0994433	-0.238754	-0.34098	1.04707	-0.101955	-0.945117	1.04707
chr1	75900001	75910000	-0.152431	-0.205283	-0.194562	-0.140124	-0.0172435	-0.0195977	0.14083	-0.287627	-0.270776	-0.203	-0.190264	-0.227115	-0.391079	-0.310249	-0.189926	-0.602771	-0.362242	-0.302428	-0.681069	-0.145399	-0.23985	-0.304744	-0.403928	-0.260177	0.0914327	-0.188643	FALSE	0.749868	-0.0393321	FALSE	0.0345897	-0.227975	FALSE	FALSE	static	-0.103534	-0.239984	-0.357604	1.02377	-0.0493661	-0.974403	1.02377
chr1	76140001	76150000	-0.332707	-0.324462	-0.421626	-0.295861	-0.23243	-0.269993	-0.341683	-0.105647	-0.41197	-0.345892	-0.474092	-0.236714	-0.446401	-0.303679	-0.237991	-0.363904	-0.250706	-0.233987	-0.300044	-0.410279	-0.343476	-0.368567	-0.203417	-0.167481	0.388456	-0.062029	FALSE	0.291065	0.0678354	FALSE	0.937135	0.00580648	FALSE	FALSE	static	-0.292572	-0.381744	-0.267664	0.357135	-1.12954	0.772401	0.772401
chr1	76150001	76160000	-0.334906	-0.355211	-0.364523	-0.286301	-0.217049	-0.264279	-0.409593	-0.100149	-0.431533	-0.374881	-0.522221	-0.218662	-0.407154	-0.405652	-0.34305	-0.399518	-0.204969	-0.19733	-0.331026	-0.369143	-0.338719	-0.319989	-0.212258	-0.151071	0.18471	-0.0963326	FALSE	0.0520605	0.122271	FALSE	0.703326	0.0259382	FALSE	FALSE	static	-0.290123	-0.44675	-0.248265	0.365643	-1.13136	0.765719	0.765719
chr1	76320001	76330000	-0.325257	-0.549766	-0.412911	-0.268596	-0.297758	-0.356681	-0.198026	-0.0657611	-0.444546	-0.483167	-0.417533	-0.484722	-0.351762	-0.231162	-0.211482	-0.278706	-0.0680281	-0.189159	-0.206629	-0.249221	-0.190886	-0.332631	-0.475314	-0.264271	0.617257	-0.0535406	FALSE	0.169235	0.115868	FALSE	0.510607	0.0623271	FALSE	FALSE	static	-0.277846	-0.363825	-0.213172	0.093968	-1.04367	0.949699	0.949699
chr1	76820001	76830000	-0.0915767	0.0276889	-0.0227833	-0.0703224	0.079056	0.110585	-0.0131483	0.0470531	-0.2055	-0.0745031	-0.0700904	-0.0559503	-0.104231	-0.185237	-0.166383	-0.12435	-0.0343427	0.104257	0.00947896	-0.0429782	-0.0383688	-0.180213	-0.104836	-0.0194186	0.0207195	-0.1316	FALSE	0.106746	0.084978	FALSE	0.389454	-0.0466216	FALSE	FALSE	static	0.0151877	-0.0862992	-0.0130011	0.825104	-1.11213	0.287022	0.825104
chr1	76890001	76900000	-0.569999	-0.355764	-0.421442	-0.427754	-0.393969	-0.0740734	-0.0673679	-0.160681	-0.264004	-0.280836	-0.243009	-0.231181	-0.239785	-0.3597	-0.282786	-0.393861	-0.301424	-0.554853	-0.286793	-0.417691	-0.437923	-0.354462	-0.525118	-0.39698	0.861638	0.0219863	FALSE	0.0481407	-0.122511	FALSE	0.33924	-0.100524	FALSE	FALSE	static	-0.276166	-0.237431	-0.399329	0.332897	0.791092	-1.12399	0.791092
chr1	77120001	77130000	-0.778177	-0.930318	-0.916211	-1.02314	-0.781046	-0.960642	-0.806837	-0.889554	-0.906494	-0.885842	-1.00884	-0.741969	-0.959931	-0.969928	-0.850441	-0.692716	-0.721739	-0.756442	-1.04821	-0.949468	-1.04833	-0.855733	-0.841825	-0.95582	0.927982	0.00872097	FALSE	0.84062	-0.0201751	FALSE	0.895484	-0.0114542	FALSE	FALSE	static	-0.854924	-0.857007	-0.884542	0.639223	0.513182	-1.15241	0.639223
chr1	77130001	77140000	-0.918133	-1.04031	-1.08413	-1.20319	-0.814852	-1.01022	-0.839865	-0.962453	-0.991646	-0.925895	-1.04062	-0.841236	-1.08023	-1.00956	-1.05002	-0.786001	-0.891328	-0.88456	-1.14667	-1.07525	-1.23517	-0.909052	-0.931643	-1.01735	0.862252	0.0184914	FALSE	0.627058	-0.0457248	FALSE	0.785295	-0.0272334	FALSE	FALSE	static	-0.969383	-0.937421	-0.991802	-0.116391	1.0531	-0.936711	1.0531
chr1	77140001	77150000	-0.947003	-1.08061	-1.13665	-1.19061	-0.788407	-0.985463	-0.809701	-0.938078	-0.952261	-0.86696	-0.976538	-0.871044	-1.09962	-0.964493	-1.13585	-0.79573	-0.936088	-0.928775	-1.11825	-1.04318	-1.23079	-0.878378	-0.922944	-0.966335	0.821248	0.0267538	FALSE	0.627058	-0.0452796	FALSE	0.859361	-0.0185258	FALSE	FALSE	static	-0.979539	-0.919158	-0.978914	-0.586337	1.15465	-0.568317	1.15465
chr1	77150001	77160000	-0.841858	-0.976937	-1.0103	-1.09863	-0.633762	-0.887443	-0.60554	-0.820337	-0.784709	-0.742838	-0.840456	-0.816659	-1.00545	-0.828896	-1.0395	-0.720939	-0.865954	-0.873326	-1.05065	-0.876142	-1.16398	-0.742653	-0.785209	-0.804203	0.932384	0.0119192	FALSE	0.643613	-0.0478334	FALSE	0.768568	-0.0359142	FALSE	FALSE	static	-0.861815	-0.801767	-0.865689	-0.522462	1.15301	-0.630551	1.15301
chr1	77530001	77540000	-0.63305	-0.788207	-0.728313	-0.593841	-0.539048	-0.579527	-0.475819	-0.53542	-0.457126	-0.507635	-0.413216	-0.46392	-0.416574	-0.371019	-0.549583	-0.482526	-0.100556	-0.379156	-0.377215	-0.4883	-0.567597	-0.652466	-0.539915	-0.580479	0.0418411	0.151454	FALSE	0.98137	-0.00301072	FALSE	0.145231	0.148443	FALSE	FALSE	static	-0.605602	-0.441251	-0.471154	-1.13773	0.739662	0.398072	0.739662
chr1	77540001	77550000	-0.565694	-0.725195	-0.655297	-0.563993	-0.478727	-0.568207	-0.450624	-0.542601	-0.396665	-0.46026	-0.333951	-0.395139	-0.361987	-0.305777	-0.435853	-0.432207	-0.0839294	-0.330887	-0.354745	-0.461076	-0.504262	-0.594848	-0.511339	-0.519961	0.011441	0.178562	FALSE	0.768732	-0.0299012	FALSE	0.112005	0.148661	FALSE	FALSE	static	-0.559524	-0.374757	-0.425031	-1.11401	0.820142	0.293865	0.820142
chr1	77690001	77700000	-0.397457	-0.444622	-0.488394	-0.417597	-0.144821	-0.469487	-0.319088	-0.314112	-0.474662	-0.646203	-0.41635	-0.379094	-0.536979	-0.531143	-0.531266	-0.483588	-0.427322	-0.29099	-0.4246	-0.369393	-0.435843	-0.378884	-0.434424	-0.416699	0.112875	-0.125463	FALSE	0.0504062	0.102641	FALSE	0.731423	-0.0228222	FALSE	FALSE	static	-0.364519	-0.440156	-0.377685	0.73255	-1.13927	0.406725	0.73255
chr1	77700001	77710000	-0.387021	-0.433282	-0.3699	-0.388149	-0.132782	-0.344206	-0.204309	-0.288081	-0.425746	-0.578673	-0.345831	-0.333894	-0.516813	-0.447802	-0.498302	-0.40854	-0.350606	-0.283078	-0.415401	-0.309285	-0.405536	-0.312368	-0.361309	-0.399808	0.0970682	-0.125984	FALSE	0.0870039	0.089776	FALSE	0.53914	-0.0362079	FALSE	FALSE	static	-0.31294	-0.383974	-0.32877	0.776443	-1.12839	0.351949	0.776443
chr1	77910001	77920000	-0.138904	-0.47777	-0.235224	-0.151738	-0.249471	-0.391483	-0.141304	-0.219334	-0.121463	-0.422114	-0.382971	-0.196551	-0.483219	-0.312067	-0.237702	-0.428504	-0.250899	-0.2913	-0.454098	-0.0910195	-0.112656	-0.255051	-0.255391	-0.259	0.470238	-0.0724204	FALSE	0.392733	0.0768972	FALSE	0.963988	0.00447682	FALSE	FALSE	static	-0.214314	-0.282704	-0.304994	1.12212	-0.3252	-0.796923	1.12212
chr1	77920001	77930000	-0.227092	-0.433065	-0.298992	-0.112467	-0.305956	-0.466644	-0.0879496	-0.236201	-0.124349	-0.404299	-0.337649	-0.182404	-0.46692	-0.373133	-0.282666	-0.384761	-0.250361	-0.273266	-0.42866	-0.0560789	-0.145587	-0.374182	-0.24131	-0.310415	0.648732	-0.0484768	FALSE	0.513692	0.0595401	FALSE	0.915248	0.0110633	FALSE	FALSE	static	-0.236985	-0.277414	-0.377977	0.83295	0.27609	-1.10904	0.83295
chr1	77980001	77990000	0.101594	-0.0261228	0.0317298	0.00424159	-0.0934183	-0.218853	-0.172234	0.0526517	0.00768485	0.121031	0.130956	-0.000639261	-0.064893	-0.155286	-0.0501945	0.0191357	-0.410282	-0.242346	-0.191441	-0.200985	-0.236409	-0.463796	-0.277075	-0.226915	0.638736	0.0410256	FALSE	0.00148309	-0.28213	TRUE	0.00508246	-0.241105	TRUE	TRUE	down.late	0.00121323	0.0339082	-0.410167	0.510036	0.642143	-1.15218	0.642143
chr1	78110001	78120000	-0.887406	-1.07148	-0.931869	-0.904871	-0.693832	-0.654514	-0.585533	-0.851556	-0.897925	-0.794662	-1.01415	-0.882787	-0.810596	-0.660436	-1.01416	-1.12451	-0.888082	-0.711945	-0.54771	-0.770313	-0.972605	-0.737905	-0.92019	-0.652913	0.540703	-0.0772701	FALSE	0.243711	0.124695	FALSE	0.679507	0.0474251	FALSE	FALSE	static	-0.827352	-0.847981	-0.741761	-0.384461	-0.750713	1.13517	1.13517
chr1	78120001	78130000	-1.07202	-1.28996	-1.10221	-1.17865	-0.801314	-0.935144	-0.737895	-1.05843	-1.03254	-0.97016	-1.24925	-1.12907	-1.1026	-0.921067	-1.18774	-1.37512	-1.10917	-0.909648	-0.642157	-1.00369	-1.05984	-0.888936	-1.05165	-0.756254	0.463755	-0.098991	FALSE	0.0925656	0.193277	FALSE	0.447741	0.0942858	FALSE	FALSE	static	-1.02765	-1.05781	-0.883865	-0.407475	-0.73193	1.1394	1.1394
chr1	78130001	78140000	-1.07466	-1.3464	-1.06989	-1.26758	-0.826704	-1.03697	-0.694514	-1.03319	-1.06228	-0.996111	-1.2296	-1.20985	-1.19621	-1.04423	-1.1962	-1.50237	-1.11373	-0.960566	-0.72308	-1.10168	-1.07974	-0.941475	-1.04773	-0.768349	0.353692	-0.135867	FALSE	0.0636886	0.212563	FALSE	0.563575	0.0766956	FALSE	FALSE	static	-1.05346	-1.10954	-0.92014	-0.264668	-0.841043	1.10571	1.10571
chr1	78610001	78620000	-0.470124	-0.291867	-0.317634	-0.43147	-0.302296	-0.272922	-0.647112	-0.128013	-0.391209	-0.342425	-0.31809	-0.438344	-0.515765	-0.312309	-0.262373	-0.552219	-0.421792	-0.182933	-0.303576	-0.176936	-0.427383	-0.579302	-0.279102	-0.413824	0.771535	-0.0339118	FALSE	0.654586	0.0434856	FALSE	0.937135	0.00957386	FALSE	FALSE	static	-0.31534	-0.34884	-0.531491	0.715312	0.427357	-1.14267	0.715312
chr1	78670001	78680000	-0.243568	-0.383492	-0.378039	-0.311857	-0.0349555	-0.277181	-0.0466313	-0.26296	-0.266986	-0.394903	-0.33669	-0.330843	-0.413468	-0.120162	-0.368944	-0.193312	-0.136509	-0.0673275	-0.117678	-0.146644	-0.14326	-0.408412	-0.0985889	-0.0976053	0.529642	-0.060828	FALSE	0.0536275	0.151161	FALSE	0.287548	0.0903325	FALSE	FALSE	static	-0.228986	-0.271652	-0.325629	0.958803	0.0778435	-1.03665	0.958803
chr1	78680001	78690000	-0.419711	-0.553949	-0.489846	-0.447314	-0.196505	-0.429855	-0.248015	-0.45215	-0.389567	-0.475169	-0.512684	-0.435179	-0.47203	-0.200023	-0.481719	-0.294431	-0.30581	-0.167822	-0.296643	-0.347104	-0.290069	-0.416982	-0.261457	-0.239086	0.978074	-0.00293227	FALSE	0.0913811	0.116979	FALSE	0.109953	0.114047	FALSE	FALSE	static	-0.380753	-0.384901	-0.405115	0.729118	0.41087	-1.13999	0.729118
chr1	78820001	78830000	-0.565432	-0.509475	-0.469924	-0.696599	-0.577409	-0.538431	-0.501477	-0.49664	-0.650147	-0.714007	-0.686091	-0.677486	-0.44728	-0.875579	-0.733897	-0.47023	-0.246533	-0.375616	-0.347045	-0.365738	-0.452466	-0.578301	-0.564695	-0.513683	0.208546	-0.112416	FALSE	0.0237518	0.22633	FALSE	0.0992759	0.113914	FALSE	FALSE	static	-0.516776	-0.639171	-0.441135	0.155946	-1.06881	0.912866	0.912866
chr1	78830001	78840000	-0.596559	-0.634635	-0.568869	-0.784818	-0.613454	-0.685402	-0.556956	-0.603812	-0.721526	-0.772681	-0.749939	-0.776563	-0.542099	-0.974705	-0.721596	-0.528442	-0.260978	-0.360964	-0.384692	-0.389583	-0.472647	-0.605783	-0.5927	-0.502959	0.301479	-0.0928808	FALSE	0.00926576	0.277156	TRUE	0.017287	0.184275	FALSE	TRUE	down.early	-0.601378	-0.707207	-0.456873	-0.102587	-0.944752	1.04734	1.04734
chr1	78840001	78850000	-0.564203	-0.681617	-0.561147	-0.735865	-0.613617	-0.731563	-0.492621	-0.608279	-0.679157	-0.731312	-0.658729	-0.77083	-0.584104	-0.894098	-0.673873	-0.496428	-0.33266	-0.341198	-0.336932	-0.357087	-0.459369	-0.519672	-0.562946	-0.484868	0.454194	-0.0624522	FALSE	0.00443105	0.261725	TRUE	0.00560834	0.199272	TRUE	TRUE	down.early	-0.594054	-0.668299	-0.432807	-0.240879	-0.85756	1.09844	1.09844
chr1	79240001	79250000	-0.519689	-0.444445	-0.387065	-0.413456	-0.349368	-0.534945	-0.227106	-0.288971	-0.371251	-0.393149	-0.462684	-0.504394	-0.576682	-0.620675	-0.560028	-0.598715	-0.149024	-0.210822	-0.414732	-0.263539	-0.272792	-0.260022	-0.338842	-0.323617	0.146532	-0.115317	FALSE	0.00264917	0.231773	TRUE	0.0824621	0.116457	FALSE	TRUE	down.early	-0.383229	-0.454472	-0.271709	-0.145741	-0.919133	1.06487	1.06487
chr1	79360001	79370000	-0.145006	-0.187906	-0.15005	-0.264129	-0.264527	-0.138853	-0.078857	-0.285262	-0.217691	-0.251662	-0.268442	-0.156041	-0.0883726	-0.358381	-0.19088	-0.559297	-0.19226	-0.00486035	-0.314715	-0.344949	-0.375869	-0.30495	-0.267281	-0.363125	0.438602	-0.0720222	FALSE	0.934101	-0.00965545	FALSE	0.253461	-0.0816777	FALSE	FALSE	static	-0.156121	-0.204359	-0.280672	0.917129	0.149017	-1.06615	0.917129
chr1	79480001	79490000	-0.483333	-0.476451	-0.618101	-0.582236	-0.411363	-0.362534	-0.334079	-0.390182	-0.46155	-0.548404	-0.453082	-0.309609	-0.669705	-0.551665	-0.400011	-0.395464	-0.619377	-0.448114	-0.280612	-0.746337	-0.592801	-0.51483	-0.582492	-0.429664	0.867121	-0.0164015	FALSE	0.598632	-0.0530921	FALSE	0.429278	-0.0694936	FALSE	FALSE	static	-0.458176	-0.438842	-0.507642	0.283064	0.827956	-1.11102	0.827956
chr1	80200001	80210000	-1.06441	-0.918331	-1.1923	-1.04111	-0.670478	-0.867295	-1.10341	-1.01121	-0.945088	-0.919305	-1.06499	-0.816569	-0.7707	-0.762192	-1.09119	-1.16792	-0.808214	-1.03553	-0.700712	-0.717586	-0.810895	-0.874724	-1.01449	-0.971765	0.766051	0.0413225	FALSE	0.490588	0.0755041	FALSE	0.254942	0.116827	FALSE	FALSE	static	-0.96887	-0.903388	-0.835697	-0.994424	-0.0110598	1.00548	1.00548
chr1	80210001	80220000	-1.04556	-0.982324	-1.14781	-1.04182	-0.688499	-0.857776	-1.16871	-0.978307	-0.949752	-0.958697	-1.07602	-0.838374	-0.794655	-0.786392	-1.03373	-1.2099	-0.732728	-1.00469	-0.710553	-0.770262	-0.806203	-0.91178	-0.976021	-0.968001	0.810927	0.0329101	FALSE	0.334874	0.0959116	FALSE	0.183585	0.128822	FALSE	FALSE	static	-0.967425	-0.919229	-0.832586	-0.892939	-0.187561	1.0805	1.0805
chr1	81540001	81550000	-0.468274	-0.58033	-0.554834	-0.625477	-0.506203	-0.352126	-0.568273	-0.257294	-0.62745	-0.577336	-0.387973	-0.627808	-0.68682	-0.404445	-0.305232	-0.738772	-0.384917	-0.430284	-0.619843	-0.410021	-0.780733	-0.626571	-0.565709	-0.976189	0.644958	-0.0553782	FALSE	0.709582	-0.054804	FALSE	0.357222	-0.110182	FALSE	FALSE	static	-0.477005	-0.627579	-0.837496	0.940888	0.109253	-1.05014	0.940888
chr1	81790001	81800000	-0.846205	-0.809448	-0.924967	-0.883106	-0.388401	-0.620871	-0.842577	-0.763621	-0.681609	-0.418212	-0.528622	-0.742041	-0.394169	-0.564091	-0.580872	-0.545267	-1.0109	-0.628637	-0.625418	-0.676094	-0.853844	-1.15766	-1.20954	-0.780199	0.0969526	0.203039	FALSE	0.0368262	-0.310926	FALSE	0.465006	-0.107887	FALSE	FALSE	static	-0.772977	-0.511942	-0.781147	-0.550466	1.15429	-0.603823	1.15429
chr1	81800001	81810000	-0.836793	-0.781066	-0.835247	-0.784725	-0.37738	-0.557997	-0.829518	-0.699547	-0.574449	-0.341386	-0.528803	-0.741597	-0.333912	-0.563055	-0.486046	-0.489486	-1.01786	-0.6709	-0.60607	-0.604794	-0.824449	-1.10283	-1.12488	-0.860991	0.0896275	0.205442	FALSE	0.0176349	-0.344254	FALSE	0.299617	-0.138812	FALSE	FALSE	static	-0.724854	-0.464377	-0.789914	-0.378126	1.13393	-0.755799	1.13393
chr1	83870001	83880000	-1.08726	-1.01288	-1.04215	-0.965911	-0.815765	-1.24413	-0.943067	-0.754984	-0.83666	-0.74827	-0.71936	-0.75844	-1.01782	-1.08977	-0.729693	-0.872486	-0.798741	-0.549987	-0.791362	-0.631634	-0.693407	-1.02405	-0.827519	-0.743691	0.233907	0.136706	FALSE	0.399813	0.0890135	FALSE	0.0355213	0.22572	FALSE	FALSE	static	-0.960907	-0.797217	-0.741099	-1.11931	0.313968	0.805341	0.805341
chr1	83880001	83890000	-1.11089	-1.13133	-1.17183	-1.07338	-0.78614	-1.19883	-0.915578	-0.838055	-0.898541	-0.730075	-0.764926	-0.757367	-1.01649	-1.16652	-0.8375	-0.885786	-0.831449	-0.553052	-0.805769	-0.661729	-0.768093	-1.09114	-0.86264	-0.842153	0.22388	0.146104	FALSE	0.494975	0.0801478	FALSE	0.0457086	0.226251	FALSE	FALSE	static	-1.02637	-0.828706	-0.789298	-1.14073	0.415258	0.725469	0.725469
chr1	83900001	83910000	-0.92771	-1.12572	-1.02597	-1.00727	-0.635194	-0.783894	-0.744877	-0.842581	-0.792873	-0.617895	-0.817635	-0.630434	-0.767968	-1.08062	-0.691337	-0.630467	-0.67791	-0.541596	-0.721881	-0.605006	-0.726977	-1.1197	-0.649345	-0.868339	0.283859	0.132998	FALSE	0.920497	0.0148089	FALSE	0.219668	0.147807	FALSE	FALSE	static	-0.901246	-0.710089	-0.717643	-1.154	0.611891	0.542107	0.611891
chr1	84130001	84140000	-0.869709	-0.872884	-0.77259	-0.82618	-0.654608	-0.781178	-0.683297	-0.650319	-0.731972	-0.763691	-0.674805	-0.78179	-0.940672	-0.768072	-0.862697	-0.829442	-1.01977	-0.736272	-0.758582	-0.824604	-0.749363	-0.647099	-0.911874	-0.970928	0.681674	-0.0302968	FALSE	0.70507	-0.0331696	FALSE	0.424947	-0.0634664	FALSE	FALSE	static	-0.756706	-0.824662	-0.772899	0.790229	-1.12426	0.334032	0.790229
chr1	84140001	84150000	-0.819197	-0.832638	-0.684413	-0.770812	-0.578697	-0.723763	-0.612901	-0.538876	-0.679698	-0.679503	-0.562061	-0.740644	-0.960392	-0.69832	-0.816092	-0.725864	-0.871982	-0.612014	-0.734507	-0.661802	-0.679281	-0.590665	-0.821834	-1.00864	0.696862	-0.0376595	FALSE	0.897189	-0.0147693	FALSE	0.572964	-0.0524288	FALSE	FALSE	static	-0.690724	-0.762737	-0.695308	0.633272	-1.15283	0.519561	0.633272
chr1	84440001	84450000	-0.654139	-0.785086	-0.650225	-0.619342	-0.611888	-0.71479	-0.538739	-0.774077	-0.687221	-0.570208	-0.775268	-0.633108	-0.538041	-0.585295	-0.597085	-0.441821	-0.482416	-0.49031	-0.502329	-0.510283	-0.652719	-0.571681	-0.60381	-0.491512	0.369007	0.0650299	FALSE	0.291962	0.0653734	FALSE	0.0206931	0.130403	FALSE	FALSE	static	-0.641217	-0.596113	-0.532059	-0.937438	-0.115153	1.05259	1.05259
chr1	84450001	84460000	-0.568591	-0.689664	-0.548713	-0.572274	-0.636696	-0.713723	-0.541366	-0.636932	-0.603007	-0.511204	-0.722558	-0.623792	-0.458742	-0.476951	-0.495844	-0.43563	-0.373363	-0.357223	-0.456878	-0.406076	-0.599243	-0.481505	-0.557279	-0.477123	0.272266	0.0725287	FALSE	0.253082	0.0773801	FALSE	0.0112917	0.149909	FALSE	FALSE	static	-0.57689	-0.53135	-0.456415	-0.90969	-0.161067	1.07076	1.07076
chr1	84770001	84780000	-0.536549	-0.521051	-0.555393	-0.62104	-0.607978	-0.551401	-0.462911	-0.479827	-0.522324	-0.586545	-0.606099	-0.533652	-0.751839	-0.617568	-0.618444	-0.385775	-0.402791	-0.485513	-0.854701	-0.579631	-0.683763	-0.613232	-0.606003	-0.447178	0.610432	-0.0357619	FALSE	0.955605	-0.00632084	FALSE	0.603048	-0.0420827	FALSE	FALSE	static	-0.533709	-0.529312	-0.551689	0.381904	0.75277	-1.13467	0.75277
chr1	84930001	84940000	-0.676881	-0.569927	-0.686847	-0.521771	-0.637696	-0.688668	-0.620627	-0.55563	-0.547634	-0.526903	-0.470047	-0.619304	-0.634714	-0.967145	-0.541349	-0.642529	-0.565158	-0.597905	-0.517177	-0.558013	-0.720376	-0.705036	-0.574969	-0.735165	0.992121	0.00105274	FALSE	0.980326	-0.00302171	FALSE	0.975552	-0.00196898	FALSE	FALSE	static	-0.569161	-0.560895	-0.631522	0.467	0.681067	-1.14807	0.681067
chr1	84940001	84950000	-0.691146	-0.552335	-0.649694	-0.488409	-0.606803	-0.73045	-0.580896	-0.598216	-0.55688	-0.510576	-0.475024	-0.642195	-0.634512	-0.847461	-0.527744	-0.546752	-0.578942	-0.642944	-0.506977	-0.557835	-0.774674	-0.712751	-0.553159	-0.746666	0.828594	0.0196006	FALSE	0.631062	-0.0416003	FALSE	0.747125	-0.0219998	FALSE	FALSE	static	-0.555972	-0.553981	-0.644576	0.55801	0.596477	-1.15449	0.596477
chr1	84950001	84960000	-0.570443	-0.423491	-0.49975	-0.375312	-0.456475	-0.654214	-0.422204	-0.528047	-0.481608	-0.419953	-0.382883	-0.537247	-0.510879	-0.740909	-0.42907	-0.46824	-0.535538	-0.551905	-0.410905	-0.441649	-0.669385	-0.582041	-0.4364	-0.689765	0.957555	-0.00510669	FALSE	0.610959	-0.0433496	FALSE	0.492767	-0.0484563	FALSE	FALSE	static	-0.432345	-0.455481	-0.548432	0.7553	0.37875	-1.13405	0.7553
chr1	85260001	85270000	-1.11126	-1.00521	-0.916138	-0.887819	-0.725229	-0.866516	-0.772314	-1.09643	-1.06621	-0.893883	-0.82489	-0.945827	-1.00801	-0.858094	-1.05629	-1.01063	-0.626427	-0.495683	-0.47994	-0.395562	-0.560157	-0.656306	-0.562601	-0.682764	0.731182	-0.0353637	FALSE	0.000107165	0.400549	TRUE	0.00119592	0.365185	TRUE	TRUE	up.late	-0.88066	-0.938972	-0.544021	-0.435169	-0.708682	1.14385	1.14385
chr1	85270001	85280000	-1.14342	-1.02765	-0.97519	-0.814504	-0.781521	-0.838489	-0.664795	-1.09748	-1.12044	-0.882691	-0.902976	-0.895015	-1.05487	-0.954129	-1.11867	-1.05371	-0.674683	-0.511075	-0.448239	-0.484262	-0.595866	-0.788292	-0.571628	-0.750748	0.474581	-0.0799321	FALSE	0.000475072	0.394715	TRUE	0.00790421	0.314783	TRUE	TRUE	up.late	-0.881628	-0.972624	-0.59385	-0.331748	-0.791966	1.12371	1.12371
chr1	85280001	85290000	-1.00734	-0.905873	-0.839732	-0.603373	-0.744271	-0.708717	-0.450525	-0.955911	-0.971306	-0.751218	-0.818991	-0.717835	-0.93707	-0.908016	-0.965452	-1.0815	-0.692972	-0.46821	-0.377999	-0.492255	-0.561691	-0.753413	-0.516814	-0.752039	0.350782	-0.116955	FALSE	0.0045181	0.316999	TRUE	0.0883676	0.200043	FALSE	TRUE	down.early	-0.739701	-0.854949	-0.570987	-0.124788	-0.931749	1.05654	1.05654
chr1	85290001	85300000	-0.787072	-0.649427	-0.665806	-0.400553	-0.708232	-0.512152	-0.302006	-0.714097	-0.754735	-0.570673	-0.672536	-0.480289	-0.803865	-0.751413	-0.74546	-0.901778	-0.647286	-0.421805	-0.340157	-0.45179	-0.451707	-0.644702	-0.475709	-0.628405	0.325136	-0.117675	FALSE	0.0342308	0.202399	FALSE	0.414589	0.0847232	FALSE	FALSE	static	-0.558283	-0.664865	-0.495649	0.17123	-1.07456	0.903329	0.903329
chr1	85300001	85310000	-0.57751	-0.402423	-0.473507	-0.243367	-0.558135	-0.362564	-0.162867	-0.561927	-0.530151	-0.441417	-0.495084	-0.251958	-0.604773	-0.608749	-0.483508	-0.739997	-0.531498	-0.404648	-0.361974	-0.378895	-0.407584	-0.523426	-0.455975	-0.482123	0.386393	-0.101667	FALSE	0.367836	0.0761894	FALSE	0.782709	-0.0254779	FALSE	FALSE	static	-0.37591	-0.470892	-0.426163	1.01882	-0.980058	-0.0387574	1.01882
chr1	85520001	85530000	0.220746	0.25098	0.247909	0.365986	0.271294	0.0974409	-0.240537	0.0540453	0.154498	0.302785	0.27766	-0.24442	0.236422	0.0284678	0.259465	0.0786879	0.000681637	-0.135922	-0.225861	0.416385	-0.0109477	0.237442	0.193198	-0.144988	0.903255	-0.0217873	FALSE	0.547862	-0.0954472	FALSE	0.42221	-0.117234	FALSE	FALSE	static	0.221403	0.183917	0.0541417	0.777575	0.350491	-1.12807	0.777575
chr1	85700001	85710000	-0.814727	-0.79648	-0.759761	-0.797584	-1.06055	-0.886823	-0.770477	-0.585024	-0.605416	-0.63034	-0.489651	-0.671863	-0.775936	-0.693035	-0.637489	-0.774223	-0.267042	-0.436897	-0.491246	-0.460567	-0.518167	-0.407561	-0.554222	-0.487069	0.108023	0.149184	FALSE	0.00591726	0.206898	TRUE	0.000973549	0.356081	TRUE	TRUE	up.late	-0.767872	-0.613428	-0.450153	-0.990607	-0.0185286	1.00914	1.00914
chr1	85900001	85910000	-0.266	-0.345659	-0.248037	-0.379526	-0.245593	-0.258349	-0.0683181	-0.160886	-0.123758	-0.305117	-0.309617	-0.284807	-0.161672	-0.147694	-0.302484	-0.187752	-0.00481014	-0.0446573	-0.0117406	-0.392253	-0.364934	-0.208116	-0.23947	-0.148102	0.816898	0.0186833	FALSE	0.59636	0.0511024	FALSE	0.444879	0.0697858	FALSE	FALSE	static	-0.21376	-0.273176	-0.136527	-0.0866805	-0.953838	1.04052	1.04052
chr1	86350001	86360000	-0.742988	-0.783071	-0.713359	-0.616705	-0.241015	-0.431709	-0.868077	-0.589969	-0.563597	-0.627915	-0.789804	-0.590636	-0.565576	-0.526153	-0.134082	-0.692773	-0.428563	-0.568672	-0.311339	-0.439823	-0.354866	-0.230186	-0.402112	-0.426737	0.715413	0.0620445	FALSE	0.151444	0.16603	FALSE	0.057661	0.228074	FALSE	FALSE	static	-0.60876	-0.535203	-0.355892	-0.836551	-0.271026	1.10758	1.10758
chr1	86360001	86370000	-0.743114	-0.799809	-0.684953	-0.582278	-0.263332	-0.511797	-0.94684	-0.607296	-0.568906	-0.596257	-0.77467	-0.531017	-0.56526	-0.530646	-0.148969	-0.634465	-0.356864	-0.529249	-0.329159	-0.452017	-0.42146	-0.247735	-0.398459	-0.409386	0.524685	0.0986534	FALSE	0.154037	0.150733	FALSE	0.0412339	0.249386	FALSE	FALSE	static	-0.622633	-0.518484	-0.361359	-0.926089	-0.134258	1.06035	1.06035
chr1	86510001	86520000	-0.177524	0.0067142	-0.218097	-0.248348	-0.120752	-0.187329	-0.054552	-0.361196	-0.18059	-0.196857	-0.195194	-0.234162	-0.339361	-0.214648	-0.326058	-0.245965	-0.297954	-0.303718	-0.405172	-0.343832	-0.433812	-0.362216	-0.426522	-0.357879	0.327156	-0.0714691	FALSE	0.00712671	-0.124784	TRUE	0.010298	-0.196253	FALSE	TRUE	down.late	-0.129781	-0.183424	-0.336628	0.808906	0.309166	-1.11807	0.808906
chr1	86700001	86710000	-0.476639	-0.643762	-0.50991	-0.539991	-0.252145	-0.443462	-0.67549	-0.334345	-0.35025	-0.483413	-0.442634	-0.325348	-0.595976	-0.5798	-0.166908	-0.611048	-0.233645	-0.0916154	-0.258805	-0.43414	-0.248119	-0.343049	-0.293266	-0.222987	0.759499	0.040046	FALSE	0.0716924	0.178719	FALSE	0.0200204	0.218765	FALSE	FALSE	static	-0.456481	-0.409233	-0.236281	-0.769021	-0.361448	1.13047	1.13047
chr1	86710001	86720000	-0.398627	-0.577326	-0.440113	-0.319978	-0.17222	-0.387706	-0.587723	-0.329845	-0.279696	-0.435163	-0.364204	-0.235397	-0.523939	-0.474792	-0.0561406	-0.517906	-0.20666	-0.0507277	-0.240218	-0.344579	-0.273968	-0.309312	-0.281203	-0.193765	0.755749	0.0407876	FALSE	0.208517	0.12335	FALSE	0.0524296	0.164138	FALSE	FALSE	static	-0.369997	-0.330397	-0.218042	-0.810024	-0.307656	1.11768	1.11768
chr1	86760001	86770000	-0.368775	-0.390984	-0.239227	-0.331607	-0.389311	-0.312304	-0.327591	-0.501657	-0.320389	-0.381157	-0.163693	-0.192066	-0.159176	-0.231284	-0.286129	-0.256029	-0.271233	-0.477694	-0.373963	-0.378682	-0.428458	-0.375034	-0.361562	-0.426319	0.0802345	0.108942	FALSE	0.0141415	-0.137878	FALSE	0.561221	-0.028936	FALSE	FALSE	static	-0.315255	-0.237336	-0.364143	-0.151304	1.06703	-0.915726	1.06703
chr1	87090001	87100000	-0.935922	-0.677583	-0.773085	-0.61115	-0.644717	-0.876651	-0.722789	-0.678134	-1.1524	-0.646008	-0.491264	-0.620737	-0.485772	-0.819542	-0.906446	-0.701906	-0.873543	-0.701062	-0.934035	-0.802404	-0.65777	-0.881666	-0.702068	-0.839682	0.944611	0.0119942	FALSE	0.609697	-0.0710192	FALSE	0.441181	-0.0590249	FALSE	FALSE	static	-0.717948	-0.656591	-0.757275	-0.144714	1.06447	-0.919759	1.06447
chr1	87100001	87110000	-1.01603	-0.743412	-0.828286	-0.711804	-0.772615	-0.865528	-0.870589	-0.746275	-1.19801	-0.637703	-0.568178	-0.744339	-0.564222	-0.911215	-0.901358	-0.777229	-0.93225	-0.762063	-0.983813	-0.805007	-0.632909	-0.985409	-0.69907	-0.870499	0.835384	0.0315353	FALSE	0.752785	-0.0460955	FALSE	0.875396	-0.0145602	FALSE	FALSE	static	-0.801409	-0.718054	-0.779928	-0.807459	1.11858	-0.311119	1.11858
chr1	87110001	87120000	-1.00115	-0.714278	-0.799727	-0.762101	-0.78029	-0.796522	-1.00492	-0.727267	-1.0987	-0.578853	-0.606146	-0.769109	-0.606337	-0.871027	-0.868551	-0.761811	-0.883631	-0.783343	-0.925622	-0.778955	-0.594611	-1.0026	-0.637071	-0.780959	0.675222	0.0532153	FALSE	0.833139	-0.0282827	FALSE	0.800029	0.0249326	FALSE	FALSE	static	-0.803284	-0.709234	-0.732193	-1.12261	0.795417	0.327194	0.795417
chr1	87290001	87300000	-0.609006	-0.646627	-0.48614	-0.70007	-0.525287	-0.55046	-0.442289	-0.327839	-0.607974	-0.626594	-0.482431	-0.508296	-0.544384	-0.677752	-0.808246	-0.527522	-0.481845	-0.480956	-0.340978	-0.651449	-0.502602	-0.577462	-0.498007	-0.449362	0.495965	-0.0619352	FALSE	0.168873	0.100067	FALSE	0.624044	0.0381321	FALSE	FALSE	static	-0.537419	-0.680887	-0.475118	0.256407	-1.10324	0.846831	0.846831
chr1	87300001	87310000	-0.712631	-0.811427	-0.614126	-0.767815	-0.571021	-0.666155	-0.476955	-0.405338	-0.672644	-0.665889	-0.544536	-0.705146	-0.665421	-0.780905	-0.792944	-0.650652	-0.518108	-0.505868	-0.45705	-0.689166	-0.61575	-0.673289	-0.611383	-0.511918	0.543169	-0.0565838	FALSE	0.0667757	0.111951	FALSE	0.509013	0.055367	FALSE	FALSE	static	-0.632469	-0.772424	-0.548407	0.164639	-1.0721	0.907463	0.907463
chr1	87980001	87990000	-0.131481	-0.23332	-0.315413	-0.142447	-0.109132	-0.0821991	-0.0367829	-0.0566775	-0.0838425	-0.142991	-0.146587	0.0186647	-0.233095	-0.38703	-0.179968	-0.212986	-0.022847	-0.00602688	-0.2696	-0.0348141	-0.181392	-0.133653	-0.278016	-0.174485	0.722465	-0.0325477	FALSE	0.716482	0.0333752	FALSE	0.992572	0.000827479	FALSE	FALSE	static	-0.0964623	-0.124591	-0.131099	1.13652	-0.391517	-0.745005	1.13652
chr1	88080001	88090000	-0.20208	-0.248122	-0.287359	-0.193077	-0.195466	-0.0956749	-0.151313	-0.187353	-0.232419	-0.364473	-0.199693	-0.0724996	-0.11306	-0.163996	-0.25825	-0.519333	-0.242879	-0.248355	-0.375503	-0.235964	-0.275483	-0.226282	-0.263712	-0.4625	0.625473	-0.0454096	FALSE	0.585345	-0.0508695	FALSE	0.0626064	-0.0962791	FALSE	FALSE	static	-0.175848	-0.180875	-0.235502	0.651643	0.499721	-1.15136	0.651643
chr1	88140001	88150000	-0.208045	-0.130239	-0.220436	-0.136896	-0.19528	-0.141819	-0.0499328	0.107524	-0.242067	-0.228499	-0.0905593	-0.34174	-0.2746	-0.0992428	-0.0490473	-0.364966	-0.219923	-0.289566	-0.451245	-0.202258	-0.0241999	-0.245351	-0.291172	-0.672606	0.31325	-0.0894496	FALSE	0.472699	-0.0881998	FALSE	0.110739	-0.177649	FALSE	FALSE	static	-0.11606	-0.164257	-0.251052	0.892612	0.18807	-1.08068	0.892612
chr1	88630001	88640000	-0.09088	-0.158788	0.0322527	-0.121912	-0.13963	-0.197091	0.0326883	0.0887871	-0.218888	-0.341608	-0.253064	-0.353334	-0.231484	-0.223435	-0.285422	-0.0105271	-0.0984033	-0.453351	0.00225366	-0.21225	-0.21162	-0.133332	-0.496983	-0.243553	0.0518042	-0.170399	FALSE	0.945085	0.00881542	FALSE	0.108969	-0.161583	FALSE	FALSE	static	-0.0689951	-0.204001	-0.168191	1.11622	-0.81412	-0.302099	1.11622
chr1	88640001	88650000	-0.0746827	-0.182172	0.0196181	-0.105959	-0.138455	-0.0934816	-0.0308442	0.131592	-0.179208	-0.377823	-0.206183	-0.367157	-0.263687	-0.186431	-0.233024	-0.0155394	0.0392473	-0.314589	0.113017	-0.125631	-0.0918632	0.0781336	-0.32472	-0.177532	0.0559202	-0.169333	FALSE	0.229917	0.128139	FALSE	0.691805	-0.0411943	FALSE	FALSE	static	-0.0685572	-0.198072	-0.0262869	0.324901	-1.12205	0.797148	0.797148
chr1	88650001	88660000	-0.137714	-0.178022	-0.0477857	-0.11769	-0.1768	-0.150547	-0.154273	0.0683964	-0.151955	-0.429873	-0.192346	-0.442726	-0.263955	-0.122989	-0.219366	-0.0475544	0.114127	-0.146426	0.18729	-0.0756405	-0.0511355	0.16413	-0.243276	-0.179207	0.187686	-0.122041	FALSE	0.0715715	0.205078	FALSE	0.374161	0.0830372	FALSE	FALSE	static	-0.109125	-0.201066	0.050736	-0.177683	-0.899249	1.07693	1.07693
chr1	88890001	88900000	-0.582747	-0.625003	-0.663166	-0.674939	-0.341978	-0.671376	-0.756558	-0.59808	-0.509002	-0.439811	-0.356385	-0.441956	-0.633613	-0.77077	-0.710735	-0.594787	-0.559511	-0.438317	-0.490252	-0.529245	-0.462785	-0.513894	-0.561327	-0.690592	0.60854	0.0570984	FALSE	0.787228	0.0263921	FALSE	0.248456	0.0834905	FALSE	FALSE	static	-0.588129	-0.706915	-0.475806	0.0186419	-1.00919	0.990549	0.990549
chr1	88900001	88910000	-0.572205	-0.570754	-0.618714	-0.643036	-0.287438	-0.587902	-0.695753	-0.614105	-0.505495	-0.382673	-0.420462	-0.45565	-0.554406	-0.858441	-0.682324	-0.651198	-0.510747	-0.39653	-0.548631	-0.507152	-0.46664	-0.576966	-0.485482	-0.65895	0.941756	0.00990713	FALSE	0.656412	0.0449439	FALSE	0.456678	0.054851	FALSE	FALSE	static	-0.554893	-0.728564	-0.47449	0.239409	-1.09797	0.858566	0.858566
chr1	88980001	88990000	-0.494607	-0.488678	-0.547494	-0.457485	-0.617436	-0.493144	-0.506255	-0.596115	-0.484364	-0.396751	-0.336187	-0.49311	-0.631054	-0.415324	-0.47446	-0.346005	-0.305788	-0.748409	-0.236583	-0.428864	-0.378197	-0.381665	-0.518233	-0.732268	0.212576	0.077995	FALSE	0.883795	-0.019094	FALSE	0.565308	0.0589009	FALSE	FALSE	static	-0.497119	-0.413442	-0.445922	-1.06571	0.917821	0.147887	0.917821
chr1	89080001	89090000	-0.195162	-0.0786928	-0.162033	-0.0103263	0.000782499	-0.100535	0.0181333	0.101247	-0.0257669	-0.197503	-0.145459	0.00191016	-0.258702	-0.193889	-0.325309	-0.177155	-0.215476	-0.242606	-0.335348	-0.234441	-0.102585	-0.322334	-0.124254	-0.0792387	0.172354	-0.111911	FALSE	0.608554	-0.041801	FALSE	0.0311356	-0.153712	FALSE	FALSE	static	-0.0426379	-0.134966	-0.179197	1.09499	-0.230098	-0.864895	1.09499
chr1	89460001	89470000	-0.663811	-0.491712	-0.683951	-0.551893	-0.417032	-0.192538	-0.524716	-0.518991	-0.492145	-0.409962	-0.57588	-0.3896	-0.918735	-0.757144	-0.679536	-0.728962	-0.419331	-0.496408	-0.370769	-0.584585	-0.618717	-0.497759	-0.538061	-0.526525	0.397256	-0.113415	FALSE	0.297606	0.112476	FALSE	0.992866	-0.000938862	FALSE	FALSE	static	-0.505035	-0.537678	-0.489225	0.227083	-1.09401	0.86693	0.86693
chr1	89470001	89480000	-0.619044	-0.415093	-0.645771	-0.510914	-0.340742	-0.1999	-0.569809	-0.464465	-0.452256	-0.380423	-0.568275	-0.318194	-0.803359	-0.747007	-0.658198	-0.709073	-0.417231	-0.419255	-0.389356	-0.589065	-0.614168	-0.490569	-0.536525	-0.478277	0.404168	-0.108881	FALSE	0.412956	0.0877926	FALSE	0.824916	-0.0210887	FALSE	FALSE	static	-0.464795	-0.494946	-0.471318	0.770607	-1.13003	0.359427	0.770607
chr1	89780001	89790000	-0.625273	-0.645085	-0.733999	-0.640619	-0.625823	-0.67566	-0.592611	-0.696394	-0.725685	-0.609964	-0.605084	-0.681373	-0.443531	-0.835532	-0.516261	-0.467113	-0.647097	-0.66368	-0.763976	-0.80888	-0.714685	-0.714731	-0.543436	-0.41427	0.6054	0.0438652	FALSE	0.642379	-0.0482764	FALSE	0.95568	-0.00441117	FALSE	FALSE	static	-0.616178	-0.598228	-0.588132	-1.07932	0.184271	0.895049	0.895049
chr1	89790001	89800000	-0.515311	-0.547161	-0.594655	-0.544709	-0.585293	-0.629598	-0.513372	-0.687878	-0.64696	-0.545847	-0.557024	-0.619597	-0.470008	-0.767587	-0.469539	-0.456613	-0.552319	-0.630891	-0.668552	-0.73818	-0.602306	-0.661942	-0.445242	-0.399179	0.899683	0.0106003	FALSE	0.826899	-0.0206796	FALSE	0.892395	-0.0100793	FALSE	FALSE	static	-0.53381	-0.548604	-0.515543	-0.0699173	-0.963206	1.03312	1.03312
chr1	89990001	90000000	-0.983822	-0.935633	-0.839497	-0.923602	-0.587172	-0.661969	-0.64219	-0.625714	-0.727522	-1.1422	-0.748824	-0.574278	-0.607919	-0.8149	-1.0876	-0.752095	-0.589795	-0.523473	-0.515195	-0.502243	-0.897852	-0.642187	-0.605087	-0.791354	0.84896	-0.0319662	FALSE	0.184002	0.173518	FALSE	0.181261	0.141552	FALSE	FALSE	static	-0.758456	-0.834731	-0.642248	-0.137327	-0.924239	1.06157	1.06157
chr1	90020001	90030000	-1.23317	-0.971267	-1.0145	-0.987366	-0.702305	-1.01847	-0.90639	-0.903921	-0.813652	-1.22897	-0.672933	-0.771509	-0.87272	-0.997462	-1.02161	-0.884568	-0.569419	-0.524498	-0.758556	-0.528411	-0.688471	-0.691792	-0.540717	-0.731631	0.663228	0.0592455	FALSE	0.01678	0.278741	FALSE	0.00241764	0.337986	TRUE	TRUE	up.late	-0.920602	-0.850246	-0.600516	-0.773715	-0.355453	1.12917	1.12917
chr1	90030001	90040000	-1.12098	-0.925849	-1.01511	-0.875406	-0.683118	-0.952345	-0.850606	-0.820509	-0.772203	-1.06165	-0.63481	-0.800411	-0.861646	-0.932467	-0.868787	-0.886361	-0.542442	-0.515103	-0.714856	-0.479899	-0.611587	-0.68433	-0.52342	-0.663673	0.617825	0.0531984	FALSE	0.0051048	0.260378	TRUE	0.0019325	0.313577	TRUE	TRUE	up.late	-0.857866	-0.802907	-0.556727	-0.740164	-0.397458	1.13762	1.13762
chr1	90040001	90050000	-0.922676	-0.827123	-0.916776	-0.744991	-0.662671	-0.816787	-0.750292	-0.736104	-0.718666	-0.925525	-0.613223	-0.780074	-0.830094	-0.848287	-0.709972	-0.855021	-0.522269	-0.469744	-0.736922	-0.465873	-0.555291	-0.628545	-0.480595	-0.625343	0.894573	0.0120701	FALSE	0.00584029	0.224535	TRUE	0.00261126	0.236605	TRUE	TRUE	up.late	-0.750706	-0.74315	-0.52168	-0.606144	-0.548069	1.15421	1.15421
chr1	90100001	90110000	-0.515095	-0.262271	-0.570858	-0.397269	-0.22326	-0.0926803	-0.121629	-0.347341	-0.379765	-0.420379	-0.226518	-0.347523	-0.362355	-0.364413	-0.464215	-0.320913	-0.4326	-0.416908	-0.508286	-0.199091	-0.389333	-0.476009	-0.306014	-0.538162	0.697072	-0.0444597	FALSE	0.512111	-0.0475402	FALSE	0.374348	-0.092	FALSE	FALSE	static	-0.322697	-0.329169	-0.379436	0.678408	0.470007	-1.14841	0.678408
chr1	90650001	90660000	-0.00886585	0.0613759	0.0606185	0.0146292	0.129841	0.0647794	0.0658539	-0.0254711	-0.1714	-0.0339459	-0.0613052	0.0556886	-0.119852	-0.0088924	-0.123495	-0.0517907	-0.178082	-0.112399	0.0655573	0.164008	-0.00743864	0.00978343	-0.081918	0.0851062	0.0400951	-0.109719	FALSE	0.426206	0.0574511	FALSE	0.405793	-0.052268	FALSE	FALSE	static	0.0514709	-0.0465754	0.033752	0.738553	-1.13798	0.399427	0.738553
chr1	90660001	90670000	-0.0206987	-0.0645192	0.0514524	-0.0408412	0.0867567	-0.0264413	0.0253073	0.0143414	-0.199581	-0.0920202	-0.0958634	0.0197072	-0.129277	-0.0293426	-0.192718	-0.0407115	-0.198059	-0.213919	0.116838	0.133611	-0.0717166	-0.0815318	-0.126153	0.0523807	0.0712972	-0.0981454	FALSE	0.595471	0.0464071	FALSE	0.48688	-0.0517383	FALSE	FALSE	static	-0.0100484	-0.0787458	-0.0197454	0.702824	-1.14484	0.442017	0.702824
chr1	90710001	90720000	-0.39634	-0.514941	-0.261605	-0.231987	-0.23134	-0.189439	-0.256405	-0.180307	-0.164372	-0.245218	-0.376079	-0.277201	-0.427554	-0.287331	-0.20233	-0.364125	-0.199875	-0.327446	-0.172304	-0.305037	-0.310934	-0.246028	-0.3105	-0.15788	0.917092	-0.0102307	FALSE	0.530601	0.0392756	FALSE	0.68258	0.029045	FALSE	FALSE	static	-0.36933	-0.249721	-0.23677	-1.15016	0.486475	0.663684	0.663684
chr1	90880001	90890000	-0.363597	-0.0953237	-0.118034	-0.317106	-0.100447	-0.351101	-0.418614	-0.366927	-0.40228	-0.239498	-0.402942	-0.162776	-0.291622	-0.284421	-0.35967	-0.242885	-0.58452	-0.524502	-0.53536	-0.303551	-0.348503	-0.0570794	-0.189506	-0.27567	0.749455	-0.0318681	FALSE	0.639982	-0.0540747	FALSE	0.458837	-0.0859428	FALSE	FALSE	static	-0.222319	-0.287908	-0.243711	0.86681	-1.09407	0.227262	0.86681
chr1	90890001	90900000	-0.325275	-0.0437345	-0.0645528	-0.245859	-0.13825	-0.301541	-0.386164	-0.277802	-0.288046	-0.149887	-0.320956	-0.0738943	-0.225198	-0.249505	-0.271107	-0.163826	-0.468416	-0.533336	-0.510427	-0.266057	-0.333045	-0.0838152	-0.138298	-0.237457	0.959846	0.00509478	FALSE	0.304368	-0.103554	FALSE	0.35053	-0.0984593	FALSE	FALSE	static	-0.174293	-0.202107	-0.216553	1.08746	-0.207466	-0.879994	1.08746
chr1	91030001	91040000	-0.470523	-0.503949	-0.444308	-0.590891	-0.473454	-0.645182	-0.355465	-0.473815	-0.478663	-0.785373	-0.479278	-0.472085	-0.604909	-0.627476	-0.602227	-0.693757	-0.340694	0.111698	0.0324593	0.0286066	0.0923996	0.100245	0.0178704	0.00349836	0.217862	-0.0982727	FALSE	8.35953e-05	0.598731	TRUE	0.000213425	0.500459	TRUE	TRUE	up.late	-0.50841	-0.532181	0.0572991	-0.541365	-0.612602	1.15397	1.15397
chr1	91170001	91180000	-0.40122	-0.254925	-0.418684	-0.32935	-0.314763	-0.406685	-0.19877	-0.226224	-0.299351	-0.26009	-0.364794	-0.144989	-0.448185	-0.185111	-0.0482253	-0.371541	-0.293518	-0.348011	-0.315386	-0.32061	-0.409207	-0.365396	-0.570078	-0.611283	0.559682	0.0535418	FALSE	0.136759	-0.1389	FALSE	0.245656	-0.0853585	FALSE	FALSE	static	-0.308819	-0.217558	-0.420769	0.0677585	0.964398	-1.03216	0.964398
chr1	91270001	91280000	-0.25196	-0.0929775	-0.349267	-0.339545	-0.182053	-0.140037	-0.36854	-0.346898	-0.403154	-0.113145	-0.156093	-0.20367	-0.345862	-0.422301	-0.208881	-0.191676	-0.416134	-0.379249	-0.234667	-0.450739	-0.26843	-0.24894	-0.350435	-0.28004	0.975046	0.00331199	FALSE	0.333351	-0.0729816	FALSE	0.300192	-0.0696697	FALSE	FALSE	static	-0.232023	-0.227226	-0.294097	0.511859	0.640452	-1.15231	0.640452
chr1	91280001	91290000	-0.182277	-0.0922232	-0.318256	-0.275583	-0.0755468	-0.0555185	-0.337672	-0.193518	-0.369299	-0.0745009	-0.119776	-0.174361	-0.256561	-0.335149	-0.26665	-0.140613	-0.376232	-0.354602	-0.359782	-0.409532	-0.240078	-0.276234	-0.341347	-0.258569	0.789702	-0.0257893	FALSE	0.0935053	-0.109933	FALSE	0.0434548	-0.135723	FALSE	FALSE	static	-0.173288	-0.191669	-0.290258	0.717264	0.425045	-1.14231	0.717264
chr1	91290001	91300000	-0.0559361	-0.0570533	-0.261495	-0.176091	0.0249735	0.0176063	-0.209192	0.0448098	-0.285057	0.0128798	-0.0993828	-0.142562	-0.104611	-0.20363	-0.251743	-0.0530086	-0.315909	-0.296827	-0.414073	-0.271189	-0.200446	-0.270768	-0.285909	-0.155134	0.519511	-0.0568423	FALSE	0.0468973	-0.135392	FALSE	0.013545	-0.192235	FALSE	FALSE	static	-0.0714393	-0.123321	-0.2396	0.851778	0.249281	-1.10106	0.851778
chr1	91490001	91500000	-1.16164	-1.02287	-0.723609	-0.912513	-0.952609	-0.77642	-1.2126	-0.815421	-1.13001	-0.832433	-0.988611	-0.770384	-0.717568	-0.620583	-0.986912	-1.03418	-0.382475	-0.194254	-0.214637	-0.295146	-0.289691	-0.151536	-0.2345	-0.298825	0.678732	0.0621253	FALSE	0.000347953	0.627452	TRUE	0.000176298	0.689577	TRUE	TRUE	up.late	-0.902675	-0.851689	-0.237109	-0.644802	-0.507161	1.15196	1.15196
chr1	91500001	91510000	-1.37854	-1.11236	-0.833955	-1.0395	-1.0208	-0.941612	-1.38617	-1.03575	-1.17301	-0.87991	-1.07772	-0.830421	-0.761119	-0.756922	-1.02049	-1.12155	-0.463142	-0.261953	-0.314837	-0.285859	-0.353719	-0.162616	-0.293509	-0.379802	0.321708	0.140945	FALSE	0.000162838	0.638213	TRUE	0.00013937	0.779158	TRUE	TRUE	up.late	-1.03849	-0.919561	-0.293643	-0.719548	-0.422331	1.14188	1.14188
chr1	91710001	91720000	0.0203904	0.0971522	0.175119	0.030824	0.0815823	-0.166582	0.11345	-0.0437216	0.11859	0.111199	0.161575	0.114251	0.0165395	-0.080458	-0.150844	-0.0542723	0.108948	0.195139	0.174033	0.106748	0.0663362	-0.10392	0.116899	0.144472	0.932161	-0.00895421	FALSE	0.354211	0.0715095	FALSE	0.372139	0.0625553	FALSE	FALSE	static	0.0555715	0.0796707	0.149808	-0.805717	-0.313462	1.11918	1.11918
chr1	91720001	91730000	0.0278713	0.110527	0.208474	0.0448929	0.112639	-0.157953	0.205335	0.0782149	0.119327	0.120949	0.105769	0.0849376	0.0915288	-0.00759047	-0.0518305	-0.0799195	0.153535	0.174937	0.286254	0.167565	0.0693054	-0.147977	0.0800104	0.169316	0.721387	-0.0308539	FALSE	0.37442	0.0712218	FALSE	0.653249	0.040368	FALSE	FALSE	static	0.0892779	0.08567	0.175114	-0.541355	-0.612613	1.15397	1.15397
chr1	91930001	91940000	-0.701019	-0.577347	-0.374111	-0.752203	-0.551968	-0.641818	-0.619565	-0.713703	-0.624323	-0.755644	-0.700751	-0.773081	-0.798833	-0.588246	-0.730144	-0.53733	-0.650278	-0.929798	-0.57402	-0.63026	-0.740008	-0.731841	-0.577497	-0.832554	0.39702	-0.072077	FALSE	0.834672	-0.0197382	FALSE	0.283263	-0.0918152	FALSE	FALSE	static	-0.596939	-0.6512	-0.679809	1.08598	-0.203148	-0.882828	1.08598
chr1	91940001	91950000	-0.701545	-0.606787	-0.410326	-0.745563	-0.705489	-0.710494	-0.570329	-0.761523	-0.641493	-0.771044	-0.67086	-0.79977	-0.83652	-0.589103	-0.795441	-0.545893	-0.726005	-1.0557	-0.621423	-0.639138	-0.78547	-0.697931	-0.576243	-0.889471	0.552139	-0.0547583	FALSE	0.69895	-0.042658	FALSE	0.321196	-0.0974163	FALSE	FALSE	static	-0.624294	-0.659832	-0.706623	0.951485	0.0908321	-1.04232	0.951485
chr1	92000001	92010000	-0.165858	-0.0259079	-0.117519	-0.129991	-0.400215	-0.203897	-0.0830392	-0.335673	-0.119591	0.0108151	-0.076379	-0.185211	-0.258285	-0.151501	-0.327603	-0.241081	-0.372864	-0.36572	-0.211976	-0.2749	-0.266757	-0.442531	-0.238652	-0.336526	0.900954	0.0141581	FALSE	0.0445684	-0.145136	FALSE	0.0840351	-0.130978	FALSE	FALSE	static	-0.129785	-0.105215	-0.314266	0.466488	0.681519	-1.14801	0.681519
chr1	92300001	92310000	-0.828185	-0.835543	-0.827865	-0.751655	-0.595989	-0.69167	-0.708021	-0.878164	-0.784217	-1.11995	-0.72271	-0.641786	-0.62488	-0.773218	-0.48898	-0.767905	-0.639131	-0.802168	-0.588305	-0.728766	-0.499894	-0.59651	-0.526521	-0.709466	0.855989	0.0241805	FALSE	0.352668	0.104111	FALSE	0.068988	0.128291	FALSE	FALSE	static	-0.735141	-0.637459	-0.564457	-1.04456	0.0960612	0.948503	0.948503
chr1	92310001	92320000	-0.630783	-0.740727	-0.618267	-0.541955	-0.458364	-0.553898	-0.728258	-0.737444	-0.671415	-0.903501	-0.584488	-0.496324	-0.506128	-0.598272	-0.344762	-0.641362	-0.521334	-0.723382	-0.412134	-0.4749	-0.332156	-0.40811	-0.342756	-0.515066	0.786425	0.0329304	FALSE	0.233403	0.127052	FALSE	0.0533612	0.159982	FALSE	FALSE	static	-0.585863	-0.496177	-0.388743	-0.968682	-0.0599392	1.02862	1.02862
chr1	92620001	92630000	-0.462958	-0.47136	-0.0776085	-0.260818	-0.371551	-0.532766	-0.19401	-0.462599	-0.296464	-0.235263	-0.324172	-0.272845	-0.304596	-0.151265	-0.265188	-0.359105	-0.301144	-0.207735	-0.205734	-0.266486	-0.411091	-0.167363	-0.26302	-0.30005	0.431883	0.0780966	FALSE	0.85775	0.0107842	FALSE	0.32178	0.0888807	FALSE	FALSE	static	-0.309218	-0.267777	-0.219375	-0.973201	-0.0516001	1.0248	1.0248
chr1	92630001	92640000	-0.333607	-0.343661	-0.0587818	-0.268102	-0.360419	-0.574954	-0.151792	-0.395456	-0.299874	-0.143615	-0.256514	-0.238403	-0.192804	-0.213422	-0.0864121	-0.373041	-0.27527	-0.294825	-0.244208	-0.26532	-0.381806	-0.126438	-0.199136	-0.264429	0.401413	0.0853361	FALSE	0.633722	-0.0309184	FALSE	0.54126	0.0544176	FALSE	FALSE	static	-0.253108	-0.210082	-0.21325	-1.15218	0.642131	0.510049	0.642131
chr1	92820001	92830000	-0.358126	-0.645771	-0.584212	-0.678955	-0.422459	-0.282169	-0.483708	-0.535492	-0.329035	-0.47951	-0.244747	-0.401732	-0.310484	-0.312534	-0.62333	-0.448737	-0.280732	-0.595678	-0.374475	-0.58427	-0.360039	-0.3742	-0.281108	-0.314597	0.302425	0.105098	FALSE	0.987949	-0.00187373	FALSE	0.264271	0.103224	FALSE	FALSE	static	-0.473323	-0.351655	-0.340476	-1.15137	0.499833	0.651541	0.651541
chr1	92830001	92840000	-0.666012	-0.833431	-0.752954	-0.92077	-0.752553	-0.49913	-0.620235	-0.790162	-0.528078	-0.674165	-0.418024	-0.569195	-0.488019	-0.466965	-0.832148	-0.637246	-0.4686	-0.823055	-0.53969	-0.644304	-0.482093	-0.432006	-0.396758	-0.49652	0.145144	0.152676	FALSE	0.706713	0.0413515	FALSE	0.0449032	0.194028	FALSE	FALSE	static	-0.713369	-0.530629	-0.471387	-1.12241	0.326367	0.796042	0.796042
chr1	93080001	93090000	-0.0485254	0.0876209	0.00559405	-0.043401	0.0726904	-0.145472	-0.167588	-0.270038	-0.100966	-0.0573818	0.00224475	0.00918439	0.104924	-0.00264238	-0.203632	0.0971559	-0.232922	0.039763	-0.0882933	0.100289	-0.078911	-0.00406792	-0.0148222	0.00426038	0.638455	0.0447507	FALSE	0.859594	-0.0154488	FALSE	0.731192	0.0293019	FALSE	FALSE	static	-0.0049389	-0.0784926	-0.0174532	0.729001	-1.14001	0.411011	0.729001
chr1	93250001	93260000	0.0774456	-0.0066262	0.145918	-0.129134	-0.187322	-0.355606	-0.0389609	-0.248315	-0.0256533	0.125025	0.109703	0.1902	-0.012076	-0.0429858	0.0356605	0.0118107	-0.0216887	-0.0901983	-0.0669131	-0.189628	0.194107	0.0824204	-0.0244259	-0.00571436	0.188626	0.141786	FALSE	0.395211	-0.0642157	FALSE	0.452068	0.0775699	FALSE	FALSE	static	-0.0191362	0.0896191	0.0645014	-1.12626	0.78369	0.342575	0.78369
chr1	93440001	93450000	-0.222031	-0.278188	-0.281375	-0.443514	-0.121648	-0.520443	-0.238646	-0.31522	-0.234689	-0.250873	-0.241597	-0.0612945	0.00230211	-0.173826	-0.331666	-0.240039	-0.216575	-0.520419	-0.204312	-0.187969	-0.275202	-0.529786	-0.308092	-0.202379	0.230924	0.111173	FALSE	0.219566	-0.114132	FALSE	0.979786	-0.00295858	FALSE	FALSE	static	-0.334414	-0.162144	-0.241876	-1.02384	0.974323	0.0495146	0.974323
chr1	93850001	93860000	-0.975034	-1.0199	-1.05643	-0.96473	-1.28099	-0.70719	-1.1222	-1.1219	-1.09009	-0.902936	-0.748419	-0.950896	-1.28565	-0.935681	-0.758781	-0.871289	-0.63939	-0.95897	-0.638496	-0.477544	-1.11993	-0.911264	-0.695761	-0.852892	0.52357	0.088079	FALSE	0.273473	0.156186	FALSE	0.0693863	0.244265	FALSE	FALSE	static	-0.984728	-0.925721	-0.780511	-0.834861	-0.273406	1.10827	1.10827
chr1	93860001	93870000	-1.04128	-1.04741	-1.19897	-1.07722	-1.38234	-0.595188	-1.18225	-1.06414	-1.02144	-0.96598	-0.82587	-0.982999	-1.33983	-1.01578	-0.738784	-0.894809	-0.710333	-0.952787	-0.64545	-0.486581	-1.11081	-0.928457	-0.71269	-0.838259	0.541791	0.100414	FALSE	0.203713	0.175016	FALSE	0.0668378	0.27543	FALSE	FALSE	static	-1.01834	-0.940202	-0.800187	-0.893553	-0.186605	1.08016	1.08016
chr1	94020001	94030000	-0.474003	-0.17429	-0.351143	-0.360627	-0.2029	-0.210316	-0.314135	-0.256532	-0.187902	-0.14973	-0.161261	-0.132571	-0.236252	-0.182055	-0.164438	-0.339378	-0.235914	-0.0678419	-0.389814	-0.2772	-0.32353	-0.122882	-0.215488	-0.376951	0.149351	0.098795	FALSE	0.426479	-0.0570043	FALSE	0.59582	0.0417907	FALSE	FALSE	static	-0.290771	-0.156361	-0.20335	-1.08404	0.886459	0.197585	0.886459
chr1	94330001	94340000	-0.798038	-0.852936	-0.963226	-0.741716	-0.494026	-0.731279	-0.638874	-0.567612	-0.707159	-0.749966	-0.825129	-0.730885	-0.629863	-0.377075	-0.373526	-0.356563	-0.739197	-0.673926	-0.596635	-1.01247	-0.934027	-0.455442	-0.554969	-0.556677	0.343101	0.129693	FALSE	0.520611	-0.0966479	FALSE	0.808358	0.0330447	FALSE	FALSE	static	-0.706593	-0.604659	-0.595701	-1.15164	0.503111	0.648533	0.648533
chr1	94450001	94460000	-0.0386402	-0.0180476	-0.0119895	-0.0489834	-0.105223	-0.132092	-0.121951	-0.145432	0.0069002	-0.121577	-0.120714	-0.0925043	-0.368664	-0.200908	-0.312047	-0.306083	-0.0510804	-0.425835	0.0328721	-0.000791994	-0.0155508	-0.155383	0.123091	0.0289135	0.172407	-0.111655	FALSE	0.234485	0.131479	FALSE	0.841872	0.0198242	FALSE	FALSE	static	-0.0240907	-0.161525	0.00691162	0.395741	-1.13731	0.741566	0.741566
chr1	94460001	94470000	-0.210631	-0.14713	-0.184162	-0.202385	-0.271759	-0.240958	-0.239634	-0.264965	-0.111242	-0.283309	-0.244407	-0.213733	-0.358738	-0.248012	-0.367939	-0.346978	-0.1337	-0.382708	0.0210258	-0.0319953	-0.134565	-0.219621	0.000932012	-0.0545476	0.344878	-0.0515919	FALSE	0.0705174	0.154898	FALSE	0.157788	0.103306	FALSE	FALSE	static	-0.174285	-0.237269	-0.0677	-0.169565	-0.904376	1.07394	1.07394
chr1	94470001	94480000	-0.320742	-0.202119	-0.301721	-0.277314	-0.362889	-0.300932	-0.271655	-0.38051	-0.179497	-0.308435	-0.310087	-0.288537	-0.408086	-0.267347	-0.459096	-0.298474	-0.173094	-0.282501	-0.0367375	-0.10819	-0.168846	-0.280713	-0.0610849	-0.0772062	0.846232	-0.0127097	FALSE	0.0185509	0.166398	FALSE	0.0136454	0.153689	FALSE	FALSE	static	-0.261937	-0.285929	-0.101419	-0.453632	-0.692784	1.14642	1.14642
chr1	94480001	94490000	-0.455571	-0.231881	-0.400554	-0.315926	-0.446734	-0.355732	-0.285692	-0.462333	-0.230902	-0.384888	-0.369537	-0.344352	-0.45842	-0.297609	-0.441271	-0.27541	-0.18224	-0.202926	-0.108721	-0.10498	-0.181939	-0.316686	-0.133509	-0.0862083	0.797452	0.0190041	FALSE	0.00437463	0.185647	TRUE	0.00260582	0.204652	TRUE	TRUE	up.late	-0.328556	-0.325075	-0.119894	-0.591856	-0.562723	1.15458	1.15458
chr1	94800001	94810000	-0.704256	-0.64692	-0.893164	-0.954725	-0.748561	-0.652957	-0.607729	-0.722898	-0.832005	-0.900504	-0.915162	-0.880288	-0.831371	-0.584891	-0.57376	-0.690061	-0.977439	-0.947593	-0.742865	-0.712113	-0.617353	-0.743768	-0.765272	-0.575887	0.76357	-0.034604	FALSE	0.898204	0.0157191	FALSE	0.855132	-0.0188849	FALSE	FALSE	static	-0.728091	-0.782074	-0.699472	0.20156	-1.08543	0.883867	0.883867
chr1	94810001	94820000	-0.837265	-0.892147	-1.04785	-1.01538	-0.855152	-0.773794	-0.644937	-0.849125	-0.95639	-1.02655	-1.00655	-0.975669	-0.94536	-0.653856	-0.736292	-0.855358	-1.03382	-1.01083	-0.775767	-0.80348	-0.686177	-0.786355	-0.841658	-0.622323	0.798303	-0.0300469	FALSE	0.484367	0.0744514	FALSE	0.65889	0.0444045	FALSE	FALSE	static	-0.853325	-0.898991	-0.762139	-0.217776	-0.873166	1.09094	1.09094
chr1	94820001	94830000	-0.808921	-0.989389	-1.03625	-0.93936	-0.725642	-0.823102	-0.559453	-0.851849	-0.961156	-0.90537	-0.932375	-0.958715	-0.909955	-0.677382	-0.811581	-0.862192	-0.907003	-0.878906	-0.697897	-0.729104	-0.682312	-0.745521	-0.749616	-0.593843	0.749455	-0.035595	FALSE	0.0764109	0.129315	FALSE	0.306624	0.0937204	FALSE	FALSE	static	-0.832486	-0.873905	-0.705482	-0.325067	-0.797023	1.12209	1.12209
chr1	95050001	95060000	-0.785081	-0.796132	-0.847348	-0.762773	-0.634315	-0.80709	-0.999511	-0.763674	-1.01646	-0.742433	-0.776991	-0.806858	-0.666361	-0.900214	-0.682986	-0.902921	-0.691019	-0.860971	-0.647935	-0.587834	-0.62046	-0.63935	-0.631323	-0.623818	0.908826	-0.0124119	FALSE	0.0590936	0.149064	FALSE	0.0435115	0.136652	FALSE	FALSE	static	-0.76575	-0.766863	-0.626675	-0.57043	-0.584243	1.15467	1.15467
chr1	95060001	95070000	-0.798135	-0.795343	-0.825405	-0.814448	-0.634077	-0.827471	-0.969367	-0.779513	-1.04175	-0.772474	-0.785127	-0.81966	-0.725891	-0.944406	-0.721345	-0.943222	-0.703332	-0.791643	-0.710745	-0.558879	-0.577478	-0.612722	-0.617918	-0.598836	0.663793	-0.0387644	FALSE	0.0155676	0.19779	FALSE	0.0145894	0.159026	FALSE	FALSE	static	-0.774628	-0.785715	-0.608489	-0.520609	-0.63229	1.1529	1.1529
chr1	95070001	95080000	-0.692048	-0.677545	-0.72578	-0.761203	-0.573309	-0.70346	-0.905513	-0.683767	-0.965339	-0.711129	-0.665495	-0.716844	-0.677262	-0.852201	-0.663095	-0.839431	-0.576439	-0.570758	-0.624326	-0.463423	-0.400217	-0.522929	-0.511112	-0.557129	0.586169	-0.046021	FALSE	0.00474719	0.233058	TRUE	0.00575827	0.187037	TRUE	TRUE	up.late	-0.685363	-0.693121	-0.489865	-0.543347	-0.610699	1.15405	1.15405
chr1	95290001	95300000	-0.547417	-0.820037	-0.39438	-0.692147	-0.335642	-0.220261	-0.264041	-0.30451	-0.768759	-0.52209	-0.323537	-0.443725	-0.264041	-0.555586	-0.257985	-0.392061	-0.417826	-0.42046	-0.486697	-0.299465	-0.648506	-0.555827	-0.446625	-0.436617	0.972252	0.00633123	FALSE	0.851025	-0.0230295	FALSE	0.904571	-0.0166982	FALSE	FALSE	static	-0.438809	-0.382508	-0.434706	-0.641476	1.15223	-0.510756	1.15223
chr1	95300001	95310000	-0.499414	-0.666521	-0.376137	-0.653088	-0.406445	-0.186155	-0.235138	-0.355951	-0.597899	-0.466825	-0.272089	-0.366773	-0.186715	-0.536763	-0.199835	-0.290131	-0.353628	-0.427972	-0.469222	-0.305381	-0.616185	-0.515308	-0.445267	-0.413865	0.681496	0.0577272	FALSE	0.42142	-0.0787246	FALSE	0.850501	-0.0209974	FALSE	FALSE	static	-0.411586	-0.320319	-0.415582	-0.539876	1.15391	-0.614031	1.15391
chr1	96230001	96240000	-0.588437	-0.699552	-0.569561	-0.601047	-0.751488	-0.491553	-0.322033	-0.542935	-0.404559	-0.510124	-0.450609	-0.609946	-0.416935	-0.596613	-0.412047	-0.533134	-0.480439	-0.6127	-0.602729	-0.489728	-0.580433	-0.501144	-0.477046	-0.468226	0.360412	0.0790799	FALSE	0.541425	-0.0348099	FALSE	0.551104	0.0442701	FALSE	FALSE	static	-0.52829	-0.470541	-0.488063	-1.10299	0.847395	0.255597	0.847395
chr1	96660001	96670000	-0.0633394	0.103826	-0.167819	0.0381406	-0.393657	0.135636	-0.202073	0.170486	-0.0891837	-0.151311	-0.0366956	0.108413	-0.0854686	-0.0402625	0.0163049	-0.0912437	-0.0491359	0.0837493	-0.105134	-0.201942	-0.281388	0.0261038	-0.070831	0.0888419	0.993055	0.00116911	FALSE	0.852	-0.0175361	FALSE	0.904366	-0.016367	FALSE	FALSE	static	-0.0152359	-0.0317665	-0.104602	0.742392	0.394728	-1.13712	0.742392
chr1	96720001	96730000	-0.613346	-0.498557	-0.468963	-0.442033	-0.293302	-0.404629	-0.356373	-0.267591	-0.438597	-0.385505	-0.452285	-0.492862	-0.486655	-0.57108	-0.278224	-0.402834	-0.0672353	-0.196227	-0.0881935	-0.244906	-0.219765	-0.239965	-0.303633	-0.219985	0.823298	-0.0204058	FALSE	0.00149463	0.241016	TRUE	0.00612303	0.220611	TRUE	TRUE	up.late	-0.462532	-0.428363	-0.166842	-0.679739	-0.468504	1.14824	1.14824
chr1	96730001	96740000	-0.566428	-0.408264	-0.3317	-0.316069	-0.18505	-0.272831	-0.195363	-0.242796	-0.341837	-0.34985	-0.41174	-0.422615	-0.45758	-0.469582	-0.290831	-0.315373	-0.103235	-0.138796	-0.080341	-0.202357	-0.180179	-0.193032	-0.236272	-0.178338	0.400764	-0.0676136	FALSE	0.000376401	0.218358	TRUE	0.0430975	0.150744	FALSE	TRUE	up.late	-0.371529	-0.368119	-0.12518	-0.589379	-0.565237	1.15462	1.15462
chr1	96860001	96870000	-0.487144	-0.269716	-0.352807	-0.347516	-0.334986	-0.364696	-0.337629	-0.367065	-0.244337	-0.310549	-0.401214	-0.206076	-0.219709	-0.295138	-0.529776	-0.397804	-0.466442	-0.208138	-0.289201	-0.226029	-0.442682	-0.366369	-0.45987	-0.468143	0.674219	0.0321196	FALSE	0.647767	-0.0402839	FALSE	0.910813	-0.00816432	FALSE	FALSE	static	-0.338626	-0.277304	-0.355417	-0.361001	1.13037	-0.769373	1.13037
chr1	96870001	96880000	-0.438763	-0.24419	-0.263514	-0.224582	-0.270739	-0.320425	-0.366508	-0.278449	-0.194736	-0.212477	-0.367705	-0.166962	-0.158855	-0.223088	-0.537031	-0.410562	-0.463199	-0.210255	-0.262663	-0.200139	-0.36747	-0.342343	-0.411662	-0.4164	0.865881	0.0169695	FALSE	0.595516	-0.0503396	FALSE	0.596512	-0.0333701	FALSE	FALSE	static	-0.275421	-0.230496	-0.321072	0.00533634	0.997321	-1.00266	0.997321
chr1	96950001	96960000	-0.453377	-0.478817	-0.56539	-0.425308	-0.208364	-0.294521	-0.129643	-0.0918595	-0.280723	-0.456328	-0.469896	-0.468321	-0.416159	-0.39012	-0.403173	-0.436688	-0.395609	-0.474291	-0.265914	-0.394585	-0.33908	-0.478803	-0.426663	-0.417822	0.432684	-0.0842659	FALSE	0.770344	0.0160801	FALSE	0.482306	-0.0681858	FALSE	FALSE	static	-0.354294	-0.387508	-0.391887	1.14813	-0.467576	-0.680558	1.14813
chr1	96960001	96970000	-0.380835	-0.408947	-0.478641	-0.350958	-0.207025	-0.136621	-0.119004	-0.0428055	-0.280512	-0.38798	-0.37073	-0.389505	-0.376987	-0.346201	-0.361679	-0.481236	-0.346323	-0.420981	-0.2419	-0.36819	-0.324021	-0.46485	-0.396115	-0.405	0.262846	-0.108749	FALSE	0.950687	0.00343142	FALSE	0.231339	-0.105318	FALSE	FALSE	static	-0.2875	-0.340128	-0.370186	1.07769	-0.179764	-0.897926	1.07769
chr1	97110001	97120000	-0.499276	-0.348597	-0.254032	-0.295445	-0.312561	-0.328371	-0.391308	-0.475498	-0.453184	-0.278095	-0.385185	-0.402127	-0.397787	-0.369664	-0.260343	-0.196793	-0.375278	-0.285542	-0.383979	-0.360391	-0.306544	-0.371135	-0.244631	-0.45056	0.794191	0.0202388	FALSE	0.949616	-0.00436025	FALSE	0.78809	0.0158785	FALSE	FALSE	static	-0.325662	-0.39941	-0.327529	0.599419	-1.15442	0.554996	0.599419
chr1	97530001	97540000	-0.420971	-0.426201	-0.315773	-0.498972	-0.202458	-0.667998	-0.331304	-0.245691	-0.256908	-0.283684	-0.293463	-0.226929	-0.406014	-0.562166	-0.171019	-0.257787	-0.643176	-0.127009	-0.195672	-0.346971	-0.402827	-0.351781	-0.303616	-0.447998	0.455495	0.0814248	FALSE	0.692357	-0.0451348	FALSE	0.757521	0.03629	FALSE	FALSE	static	-0.349616	-0.271685	-0.324849	-0.859716	1.09744	-0.237725	1.09744
chr1	97540001	97550000	-0.39702	-0.445591	-0.301329	-0.400429	-0.229073	-0.633613	-0.265363	-0.234908	-0.216934	-0.268577	-0.290474	-0.257204	-0.426026	-0.52693	-0.217299	-0.333436	-0.639425	-0.0742714	-0.158377	-0.389728	-0.371196	-0.289176	-0.282745	-0.383639	0.65667	0.0463058	FALSE	0.960379	-0.00645955	FALSE	0.732612	0.0398463	FALSE	FALSE	static	-0.331631	-0.274869	-0.295309	-1.07927	0.895134	0.184138	0.895134
chr1	97820001	97830000	-0.425613	-0.489489	-0.41749	-0.2749	-0.391574	-0.414713	-0.472037	-0.202696	-0.269025	-0.278367	-0.125237	-0.273805	-0.201085	-0.604685	-0.410104	-0.280423	-0.147943	-0.121268	-0.151452	-0.387175	-0.323923	-0.236307	-0.346627	-0.355978	0.412604	0.0807227	FALSE	0.648521	0.0465072	FALSE	0.0792062	0.12723	FALSE	FALSE	static	-0.351785	-0.242962	-0.247988	-1.15373	0.617775	0.535959	0.617775
chr1	98050001	98060000	-0.611641	-0.485594	-0.72249	-0.74725	-0.277591	-0.640254	-0.782067	-0.534929	-0.271662	-0.402337	-0.448646	-0.323392	-0.113234	-0.269738	-0.517391	-0.407242	-0.408916	-0.441431	-0.312123	-0.38861	-0.516686	-0.52771	-0.568304	-0.469685	0.0414701	0.256022	FALSE	0.167225	-0.109978	FALSE	0.122879	0.146044	FALSE	FALSE	static	-0.568465	-0.275012	-0.438799	-0.959082	1.03643	-0.0773441	1.03643
chr1	98060001	98070000	-0.638859	-0.533993	-0.658232	-0.717681	-0.256713	-0.627666	-0.710221	-0.518631	-0.309927	-0.373354	-0.393345	-0.299573	-0.199839	-0.286358	-0.413671	-0.310069	-0.468983	-0.489282	-0.303606	-0.360737	-0.49372	-0.457687	-0.479749	-0.529083	0.0220893	0.259482	FALSE	0.0254698	-0.124589	FALSE	0.116327	0.134893	FALSE	FALSE	static	-0.560198	-0.275151	-0.420509	-0.993305	1.00656	-0.0132583	1.00656
chr1	98460001	98470000	-0.566145	-0.587445	-0.677434	-0.570276	-0.493827	-0.496143	-0.495484	-0.656898	-0.705576	-0.654438	-0.673797	-0.649835	-0.665751	-0.550946	-0.639254	-0.954387	-0.253286	-0.340555	-0.579644	-0.559313	-0.508149	-0.515367	-0.497191	-0.613655	0.130151	-0.118792	FALSE	0.0275468	0.203353	FALSE	0.237226	0.0845615	FALSE	FALSE	static	-0.532343	-0.642938	-0.475086	0.208368	-1.08777	0.8794	0.8794
chr1	98480001	98490000	-0.60027	-0.748549	-0.780227	-0.527757	-0.400369	-0.885134	-0.58043	-0.653305	-0.858964	-0.809326	-0.879936	-0.828392	-0.748982	-0.547867	-0.767092	-1.04908	-0.312078	-0.452624	-0.629864	-0.560456	-0.557751	-0.594197	-0.550695	-0.702984	0.158283	-0.1642	FALSE	0.011188	0.266124	FALSE	0.289406	0.101924	FALSE	FALSE	static	-0.603349	-0.778811	-0.535608	0.28608	-1.11186	0.825783	0.825783
chr1	98490001	98500000	-0.55782	-0.720865	-0.695146	-0.485311	-0.349665	-0.89597	-0.564762	-0.628661	-0.789847	-0.736979	-0.859253	-0.812385	-0.688001	-0.471044	-0.688747	-1.02249	-0.354837	-0.439155	-0.587436	-0.519303	-0.516288	-0.600954	-0.515642	-0.696913	0.246242	-0.146318	FALSE	0.0296654	0.229777	FALSE	0.393517	0.083459	FALSE	FALSE	static	-0.564657	-0.726397	-0.519142	0.355675	-1.12922	0.773541	0.773541
chr1	98500001	98510000	-0.464547	-0.637132	-0.589679	-0.405587	-0.254956	-0.781182	-0.334997	-0.450168	-0.624316	-0.609703	-0.7303	-0.720271	-0.60207	-0.441136	-0.595366	-0.867266	-0.390438	-0.33186	-0.484977	-0.441767	-0.474267	-0.624851	-0.479503	-0.684299	0.179726	-0.159022	FALSE	0.0734641	0.159808	FALSE	0.994902	0.000785859	FALSE	FALSE	static	-0.456671	-0.615102	-0.486346	0.744497	-1.13664	0.392142	0.744497
chr1	98740001	98750000	-0.433455	-0.395689	-0.324095	-0.369997	-0.192992	-0.415444	-0.213199	-0.207307	-0.450673	-0.509154	-0.516728	-0.638072	-0.602728	-0.544821	-0.383755	-0.497917	-0.244977	-0.522564	-0.163214	-0.167807	-0.215566	-0.338819	-0.0665205	-0.275165	0.0155607	-0.198959	FALSE	0.00665983	0.268652	TRUE	0.414908	0.069693	FALSE	TRUE	down.early	-0.290218	-0.487847	-0.450032	1.13579	-0.748133	-0.387657	1.13579
chr1	98750001	98760000	-0.468195	-0.452359	-0.397722	-0.379379	-0.187607	-0.404256	-0.191963	-0.331477	-0.505679	-0.514306	-0.537816	-0.737608	-0.684292	-0.615226	-0.418023	-0.480747	-0.214534	-0.47633	-0.239099	-0.240082	-0.248777	-0.429041	-0.119794	-0.302713	0.0252305	-0.210092	FALSE	0.00381279	0.277916	TRUE	0.39294	0.0678235	FALSE	TRUE	down.early	-0.331429	-0.528042	-0.445421	1.04875	-0.942822	-0.105924	1.04875
chr1	98990001	99000000	0.00554393	-0.180967	-0.0517073	-0.0134143	-0.0211779	0.154405	0.256476	0.104155	-0.243816	-0.319563	-0.089724	-0.241964	-0.0308446	-0.131049	0.0859886	-0.13213	0.0131324	0.0817567	0.0371893	-0.0745741	0.0855388	0.0154845	0.100987	-0.0120401	0.109507	-0.169552	FALSE	0.0399867	0.168822	FALSE	0.99355	-0.000729782	FALSE	FALSE	static	0.0321099	-0.151056	0.053744	0.478539	-1.14935	0.670813	0.670813
chr1	99170001	99180000	-0.583211	-0.567425	-0.339304	-0.491583	-0.49554	-0.00708575	-0.161202	-0.548356	-0.303703	-0.279157	-0.298977	-0.227599	-0.17474	-0.261003	-0.251247	-0.365411	-0.0599353	-0.180969	-0.321439	-0.373477	-0.29728	-0.268242	-0.269582	-0.320142	0.310639	0.128984	FALSE	0.900296	0.00884624	FALSE	0.244768	0.13783	FALSE	FALSE	static	-0.385874	-0.246956	-0.252167	-1.15407	0.610122	0.543946	0.610122
chr1	99180001	99190000	-0.573784	-0.488346	-0.313211	-0.479261	-0.47241	0.00800787	-0.17627	-0.468431	-0.283838	-0.185993	-0.245352	-0.238272	-0.133745	-0.168232	-0.27008	-0.321021	-0.0367606	-0.182393	-0.310008	-0.366696	-0.249545	-0.212567	-0.24364	-0.296799	0.244069	0.139646	FALSE	0.929458	-0.00648441	FALSE	0.230613	0.133162	FALSE	FALSE	static	-0.354374	-0.206367	-0.221365	-1.1498	0.666947	0.482852	0.666947
chr1	99480001	99490000	-0.289732	-0.459145	-0.370435	-0.403814	-0.281021	-0.289239	-0.360605	-0.345519	-0.501971	-0.24125	-0.503202	-0.335564	-0.41588	-0.314107	-0.349829	-0.34557	-0.285169	-0.115011	-0.37344	-0.2618	-0.466287	-0.508302	-0.27257	-0.321228	0.698203	-0.0259831	FALSE	0.556701	0.0504458	FALSE	0.746284	0.0244628	FALSE	FALSE	static	-0.341047	-0.331581	-0.291509	-0.74791	-0.387933	1.13584	1.13584
chr1	99490001	99500000	-0.255412	-0.471005	-0.374238	-0.387122	-0.346233	-0.361187	-0.265791	-0.268698	-0.525974	-0.309718	-0.451501	-0.272703	-0.330137	-0.327819	-0.251912	-0.332759	-0.272504	-0.0917773	-0.356846	-0.243383	-0.461695	-0.392756	-0.278246	-0.31112	0.91033	-0.00910458	FALSE	0.534714	0.0492744	FALSE	0.555734	0.0401698	FALSE	FALSE	static	-0.329885	-0.313261	-0.263846	-0.802171	-0.318214	1.12038	1.12038
chr1	99730001	99740000	-0.631416	-0.616831	-0.9141	-0.654184	-0.789541	-0.772629	-0.641247	-0.609589	-0.61057	-0.544479	-0.607835	-0.468257	-0.461927	-0.491067	-0.765005	-0.557972	-0.455226	-0.410194	-0.582242	-0.44682	-0.762002	-0.59992	-0.503762	-0.629989	0.0959989	0.140303	FALSE	0.876925	0.0146193	FALSE	0.0551511	0.154923	FALSE	FALSE	static	-0.663469	-0.557026	-0.542716	-1.14789	0.465495	0.682395	0.682395
chr1	99740001	99750000	-0.65805	-0.668583	-0.907705	-0.635016	-0.728921	-0.835211	-0.661633	-0.732438	-0.642368	-0.534842	-0.662062	-0.475686	-0.526992	-0.455891	-0.814773	-0.565838	-0.476435	-0.46178	-0.632937	-0.45182	-0.809084	-0.603442	-0.527103	-0.574336	0.0977076	0.143638	FALSE	0.861811	0.0176894	FALSE	0.0397408	0.161327	FALSE	FALSE	static	-0.730666	-0.571869	-0.560195	-1.15253	0.514971	0.637558	0.637558
chr1	99750001	99760000	-0.631106	-0.737982	-0.975362	-0.564561	-0.641935	-0.767726	-0.734425	-0.806466	-0.675474	-0.569083	-0.653805	-0.504116	-0.555086	-0.417387	-0.842493	-0.613955	-0.508943	-0.453507	-0.662437	-0.540314	-0.7973	-0.605858	-0.529366	-0.554297	0.195976	0.12852	FALSE	0.821476	0.0224222	FALSE	0.0697892	0.150942	FALSE	FALSE	static	-0.722907	-0.585185	-0.571201	-1.15068	0.491947	0.658732	0.658732
chr1	99760001	99770000	-0.61087	-0.74889	-0.945038	-0.49707	-0.610066	-0.818622	-0.795244	-0.802117	-0.702698	-0.607863	-0.604331	-0.452541	-0.63201	-0.415159	-0.763886	-0.602012	-0.490677	-0.481637	-0.636443	-0.57727	-0.738244	-0.640129	-0.532422	-0.560237	0.203451	0.130927	FALSE	0.860788	0.0154301	FALSE	0.0875781	0.146357	FALSE	FALSE	static	-0.742202	-0.575557	-0.566562	-1.15351	0.531283	0.622223	0.622223
chr1	100110001	100120000	-0.127036	-0.217035	-0.0663827	-0.157896	-0.173618	-0.180957	-0.452299	0.0306758	-0.430934	0.0872609	0.0589959	-0.201736	0.071407	-0.0488335	-0.0222657	-0.19661	0.0203066	0.00374842	-0.085136	-0.0686616	-0.0377976	-0.0205625	-0.0861417	-0.591023	0.523927	0.082729	FALSE	0.890521	-0.0228189	FALSE	0.636316	0.0599101	FALSE	FALSE	static	-0.122801	-0.0324143	-0.210479	-0.0101418	1.00503	-0.994891	1.00503
chr1	100120001	100130000	-0.234927	-0.292663	-0.169625	-0.320612	-0.278633	-0.269143	-0.477487	-0.0243869	-0.45903	0.0128251	-0.0318114	-0.24297	-0.0314272	-0.10252	-0.0944276	-0.202597	-0.0699186	-0.0730763	-0.200893	-0.143806	-0.127577	-0.0117447	-0.146232	-0.653563	0.303195	0.11444	FALSE	0.820296	-0.0343565	FALSE	0.509888	0.0800833	FALSE	FALSE	static	-0.222044	-0.09731	-0.293568	-0.178575	1.07726	-0.898681	1.07726
chr1	100140001	100150000	-0.201356	-0.212072	-0.167784	-0.317532	-0.3128	-0.394022	-0.309105	-0.111342	-0.384314	-0.0328614	-0.162457	-0.200225	-0.105686	-0.0330102	-0.15554	-0.123901	-0.202757	-0.100715	-0.309686	-0.102594	-0.15247	0.088443	-0.196045	-0.54778	0.202105	0.103502	FALSE	0.745729	-0.0407012	FALSE	0.554786	0.0628012	FALSE	FALSE	static	-0.214255	-0.115052	-0.292959	-0.0766486	1.03612	-0.95947	1.03612
chr1	100360001	100370000	0.0149029	0.0945545	0.138372	0.023508	-0.0242389	-0.0853167	-0.0610871	-0.0108659	0.0180331	0.165602	-0.0239292	-0.0128744	0.0741316	0.0432312	0.0592136	0.0535331	0.281041	0.133244	0.0973598	0.168534	0.0164632	0.024144	0.134743	0.0410934	0.51081	0.0358891	FALSE	0.243651	0.0649602	FALSE	0.081449	0.100849	FALSE	FALSE	static	0.0615156	0.0616515	0.107044	-0.579937	-0.574759	1.1547	1.1547
chr1	100460001	100470000	-0.323536	-0.352085	-0.269208	-0.3064	-0.304461	-0.122272	-0.440185	-0.361655	-0.279386	-0.280676	-0.280908	-0.367793	-0.608977	-0.404815	-0.280753	-0.486027	-0.470714	-0.52847	-0.484613	-0.718063	-0.860098	-0.42459	-0.510869	-0.520917	0.45976	-0.0636915	FALSE	0.0587755	-0.191125	FALSE	0.010241	-0.254816	FALSE	FALSE	static	-0.276336	-0.309745	-0.508972	0.70504	0.439433	-1.14447	0.70504
chr1	100610001	100620000	-0.0536295	0.0502129	-0.0259625	0.00917877	0.187776	0.108122	0.0819084	0.184161	-0.17227	-0.123464	0.157329	-0.120926	0.0255558	0.117357	0.0168303	0.0336115	0.235703	-0.00927657	-0.0204291	0.0173384	0.0536205	0.211183	0.378438	0.25173	0.360628	-0.075968	FALSE	0.135736	0.148035	FALSE	0.411059	0.0720675	FALSE	FALSE	static	0.0640284	0.0031327	0.184682	-0.215579	-0.874628	1.09021	1.09021
chr1	100860001	100870000	-0.942631	-1.02033	-0.806459	-0.987741	-0.667887	-0.724924	-0.564839	-0.701603	-0.895908	-0.795088	-0.743472	-0.941616	-0.843184	-0.964729	-0.870735	-0.858132	-0.595236	-0.819523	-0.870444	-0.851697	-0.709866	-0.694892	-0.815401	-0.497158	0.557596	-0.0620565	FALSE	0.103862	0.132331	FALSE	0.514468	0.0702742	FALSE	FALSE	static	-0.822821	-0.843407	-0.649393	-0.47807	-0.671232	1.1493	1.1493
chr1	100870001	100880000	-1.10262	-1.2285	-1.09878	-1.40559	-0.930404	-0.912676	-0.776239	-0.876411	-1.12788	-0.992427	-1.0974	-1.12601	-1.02864	-1.23901	-1.07069	-1.04825	-0.667893	-1.01082	-1.05155	-1.00899	-0.923293	-0.84053	-1.01214	-0.709628	0.713555	-0.0498835	FALSE	0.0443717	0.188181	FALSE	0.273845	0.138298	FALSE	FALSE	static	-1.07442	-1.06245	-0.828692	-0.620007	-0.533616	1.15362	1.15362
chr1	100890001	100900000	-1.06058	-1.32944	-1.29066	-1.64475	-1.28807	-1.144	-0.975635	-1.04646	-1.23056	-1.02064	-1.4292	-1.06794	-1.11713	-1.34791	-1.09122	-1.09457	-0.61394	-1.06073	-1.02315	-0.997823	-1.01938	-0.865343	-1.06079	-0.8027	0.769631	0.0475518	FALSE	0.0351076	0.244414	FALSE	0.0351719	0.291966	FALSE	FALSE	static	-1.23232	-1.12077	-0.881686	-0.859993	-0.237319	1.09731	1.09731
chr1	100900001	100910000	-0.958683	-1.16632	-1.1689	-1.63755	-1.22911	-0.971954	-0.824596	-0.940403	-1.08938	-0.900811	-1.45326	-0.908532	-0.951767	-1.18481	-0.917918	-0.939984	-0.580035	-0.996272	-0.877039	-0.901586	-0.85554	-0.800062	-0.952562	-0.676422	0.723307	0.0688831	FALSE	0.090531	0.213368	FALSE	0.0614842	0.282251	FALSE	FALSE	static	-1.14145	-0.98057	-0.781114	-0.962484	-0.0712235	1.03371	1.03371
chr1	101040001	101050000	0.00814344	-0.166186	-0.0423025	-0.0367378	-0.0879107	-0.228107	-0.128365	-0.371277	0.0495518	-0.0806993	-0.0196551	0.00598086	-0.164546	-0.107056	-0.163096	-0.0803589	0.215653	0.136392	0.0727559	0.0442953	0.00573309	0.201916	0.152906	0.115706	0.455871	0.061608	FALSE	0.00360354	0.188154	TRUE	0.00452271	0.249762	TRUE	TRUE	up.late	-0.067455	-0.0272693	0.137113	-0.752726	-0.381959	1.13469	1.13469
chr1	101230001	101240000	-0.101528	-0.114401	0.0906315	-0.0674622	-0.0142944	-0.197739	-0.0199977	-0.0306966	-0.131656	-0.0449339	-0.00373778	-0.0126067	0.0397082	-0.0382241	-0.198834	-0.16977	0.0141199	-0.133335	-0.0418239	-0.0363184	-0.328982	0.0325052	0.10018	-0.106457	0.866712	-0.0130709	FALSE	0.939455	0.00749283	FALSE	0.95171	-0.00557803	FALSE	FALSE	static	-0.0287977	-0.0387084	-0.00335047	-0.283943	-0.827323	1.11127	1.11127
chr1	101290001	101300000	-0.504562	-0.547006	-0.717255	-0.465232	-0.267858	-0.520454	-0.416737	-0.24882	-0.366502	-0.426225	-0.3314	-0.446956	-0.508846	-0.452955	-0.522432	-0.435968	-0.335181	-0.197269	-0.317018	-0.226043	-0.402179	-0.278395	-0.379018	-0.220477	0.817941	0.02458	FALSE	0.0122816	0.141963	FALSE	0.0629212	0.166543	FALSE	FALSE	static	-0.464366	-0.373738	-0.282612	-0.999087	-0.00182331	1.00091	1.00091
chr1	102990001	103000000	-0.411234	-0.285087	-0.364262	-0.350069	-0.357419	-0.506288	-0.422149	-0.924726	-0.345455	-0.483217	-0.42578	-0.279895	-0.238421	-0.404255	-0.550052	-0.467353	-0.394993	-0.193284	-0.431703	-0.179686	-0.0632245	-0.181028	-0.179529	-0.306253	0.698776	0.0533505	FALSE	0.0666488	0.158091	FALSE	0.0793286	0.211442	FALSE	FALSE	static	-0.456126	-0.343289	-0.181107	-0.935188	-0.118978	1.05417	1.05417
chr1	103510001	103520000	-0.680732	-0.950074	-0.764035	-0.630925	-0.656221	-0.882471	-0.553633	-0.425749	-0.561317	-0.46072	-0.870311	-0.684734	-0.606767	-0.960017	-0.425574	-0.47171	-0.318721	-0.580534	-0.379967	-0.372017	-0.542751	-0.488094	-0.54375	-0.459151	0.687203	0.0628363	FALSE	0.148371	0.169521	FALSE	0.0281809	0.232357	FALSE	FALSE	static	-0.682987	-0.783813	-0.448613	-0.258848	-0.845126	1.10397	1.10397
chr1	103580001	103590000	-0.515201	0.600561	-0.111914	-0.431999	0.137848	-0.0680237	-0.326548	-0.305876	-0.656767	-0.783929	-1.03946	-0.945002	-1.00038	1.94195	-0.774999	-0.908501	-0.344995	-1.02541	-0.700465	-0.268702	-0.395295	-0.26432	0.0881148	-0.412198	0.527442	-0.393242	FALSE	0.871557	0.105477	FALSE	0.232062	-0.287765	FALSE	FALSE	static	0.267834	-0.852758	-0.476263	1.08997	-0.875096	-0.214875	1.08997
chr1	104150001	104160000	-0.371612	-0.253256	-0.269397	-0.35283	-0.323625	-0.174	-0.083081	-0.653609	-0.202978	-0.218019	-0.0346395	-0.212121	0.0346608	-0.0206444	-0.189931	-0.111366	-0.135205	-0.162746	-0.184675	-0.0507854	-0.250196	-0.143614	0.00488026	-0.204069	0.0961295	0.190796	FALSE	0.780969	-0.0214216	FALSE	0.0819059	0.169375	FALSE	FALSE	static	-0.231845	-0.0972729	-0.0906372	-1.1537	0.53521	0.618489	0.618489
chr1	104590001	104600000	-0.270204	-0.317419	-0.21173	-0.376892	-0.226283	-0.0930674	0.0584931	0.0564437	-0.404136	-0.348926	-0.23962	-0.0437654	-0.0583209	-0.348619	-0.128639	-0.169632	-0.165902	-0.388583	-0.417495	-0.282862	-0.0246206	0.000380377	-0.164166	-0.218728	0.731723	-0.045125	FALSE	0.938646	0.00996015	FALSE	0.772863	-0.0351649	FALSE	FALSE	static	-0.146669	-0.204307	-0.151487	0.651048	-1.15142	0.500371	0.651048
chr1	104600001	104610000	-0.304331	-0.407801	-0.276008	-0.503989	-0.286491	-0.184004	-0.099337	-0.0359389	-0.40255	-0.327843	-0.205689	-0.0760542	-0.16658	-0.448114	-0.16158	-0.201235	-0.168737	-0.402117	-0.505649	-0.253914	-0.0664866	-0.0777041	-0.209612	-0.281148	0.921114	0.0135319	FALSE	0.982584	0.00303473	FALSE	0.892679	0.0165666	FALSE	FALSE	static	-0.228449	-0.223608	-0.185734	-0.677744	-0.470756	1.1485	1.1485
chr1	104760001	104770000	-0.68907	-0.623802	-0.653497	-0.420414	-0.428169	-0.349824	-0.470419	-0.482166	-0.356922	-0.832972	-0.398056	-0.415736	-0.651675	-0.225583	-0.784406	-0.331493	-0.482072	-0.657674	-0.287532	-0.306897	-0.473573	-0.485391	-0.279422	-0.515468	0.931599	0.0150649	FALSE	0.669684	0.0636015	FALSE	0.387063	0.0786664	FALSE	FALSE	static	-0.523596	-0.444106	-0.392475	-1.06285	0.140589	0.922266	0.922266
chr1	104770001	104780000	-0.682443	-0.618195	-0.751034	-0.486205	-0.505405	-0.38412	-0.407501	-0.517247	-0.39462	-0.915098	-0.350761	-0.442269	-0.553742	-0.187738	-0.672838	-0.236256	-0.500239	-0.708118	-0.409607	-0.36631	-0.474722	-0.546082	-0.294803	-0.586035	0.64697	0.0748536	FALSE	0.9227	-0.0165744	FALSE	0.532853	0.0582793	FALSE	FALSE	static	-0.555041	-0.437409	-0.427444	-1.15185	0.505714	0.646137	0.646137
chr1	105200001	105210000	-0.161518	-0.156232	-0.165108	-0.00667118	0.0128338	-0.0417317	-0.132904	-0.0621289	-0.256624	-0.275766	-0.223503	-0.206362	-0.15531	-0.0928496	-0.212486	-0.0216675	-0.166214	-0.0474807	-0.0619821	0.0242671	0.0866258	-0.32631	-0.127325	-0.0443102	0.148267	-0.0913884	FALSE	0.220339	0.0977297	FALSE	0.941329	0.00634122	FALSE	FALSE	static	-0.066874	-0.174721	-0.0321794	0.328037	-1.12282	0.79478	0.79478
chr1	105790001	105800000	-0.52441	-0.475122	-0.674304	-0.465805	-0.31699	-0.679065	-0.416945	-0.767178	-0.594449	-0.573514	-0.472793	-0.406591	-0.173666	-0.438034	-0.383884	-0.641961	-0.488868	-0.297991	-0.0353574	-0.736843	-0.349123	-0.369532	-0.372483	-0.408525	0.514103	0.0793658	FALSE	0.566052	0.0782713	FALSE	0.19746	0.157637	FALSE	FALSE	static	-0.48268	-0.44817	-0.421497	-1.03986	0.0851636	0.954695	0.954695
chr1	105800001	105810000	-0.481957	-0.497197	-0.615595	-0.56983	-0.292938	-0.655921	-0.418573	-0.773997	-0.591734	-0.549984	-0.443558	-0.438124	-0.051591	-0.4012	-0.246177	-0.547302	-0.342094	-0.353415	-0.0414029	-0.796508	-0.352381	-0.348152	-0.3899	-0.369737	0.318344	0.129542	FALSE	0.832574	0.0345102	FALSE	0.189368	0.164052	FALSE	FALSE	static	-0.49299	-0.412605	-0.406848	-1.15264	0.516556	0.636081	0.636081
chr1	107150001	107160000	-0.697471	-0.973782	-0.919157	-0.661437	-0.560036	-0.400775	-0.66745	-0.365294	-0.525087	-0.562241	-0.574429	-0.565992	-0.484287	-0.745198	-0.337558	-0.558747	-0.710172	-0.585743	-0.574769	-0.566589	-0.823964	-0.695201	-0.792029	-0.905755	0.42371	0.111483	FALSE	0.0682232	-0.162585	FALSE	0.702719	-0.0511026	FALSE	FALSE	static	-0.669688	-0.511148	-0.585396	-1.02044	0.978227	0.0422099	0.978227
chr1	107210001	107220000	-0.0776584	-0.215352	-0.20604	-0.152902	0.217478	-0.090258	0.132046	-0.222559	-0.414917	-0.26719	-0.249272	-0.262488	-0.226403	-0.383042	-0.254784	-0.219002	-0.208685	-0.132037	-0.123277	-0.496454	-0.340532	-0.209127	-0.120405	-0.507343	0.0653328	-0.207732	FALSE	0.873543	0.0174048	FALSE	0.0970091	-0.190327	FALSE	FALSE	static	-0.0628031	-0.257049	-0.142587	0.935534	-1.05393	0.118391	0.935534
chr1	107470001	107480000	0.202776	0.189503	0.0414802	0.249045	0.153163	0.160547	0.298496	0.262971	0.168964	0.0563328	0.0599811	0.111494	0.24655	-0.0667817	-0.0948383	0.264111	-0.0850768	0.234817	0.209441	0.233537	0.225617	0.118555	0.158684	0.252476	0.241379	-0.101521	FALSE	0.414773	0.0752796	FALSE	0.720993	-0.0262415	FALSE	FALSE	static	0.257418	0.139309	0.219876	0.85976	-1.09742	0.23766	0.85976
chr1	107480001	107490000	0.165295	0.220374	-0.0125582	0.213688	0.0799301	0.109246	0.164738	0.153631	0.193246	0.0479981	0.137427	0.16386	0.279276	0.00882004	-0.0858877	0.302341	-0.0407828	0.216646	0.193388	0.112061	0.179723	0.174456	0.0781133	0.268124	0.955316	-0.00590785	FALSE	0.867155	0.0168311	FALSE	0.87501	0.0109232	FALSE	FALSE	static	0.215365	0.17671	0.201503	0.893901	-1.07996	0.186062	0.893901
chr1	107680001	107690000	0.21908	0.0819833	0.183059	0.295213	0.0783895	0.374069	0.170937	0.294632	0.204802	-0.00683838	0.186224	-0.189874	0.315567	0.3776	0.165159	0.47035	0.0944862	0.134372	0.149315	0.391405	0.229258	0.21373	0.0771237	0.0554787	0.891122	-0.0217968	FALSE	0.879807	-0.0222276	FALSE	0.570429	-0.0440244	FALSE	FALSE	static	0.256741	0.0394731	0.198006	0.818595	-1.11458	0.295987	0.818595
chr1	107690001	107700000	0.212441	0.0945388	0.085447	0.280421	0.0444972	0.297331	0.131844	0.319181	0.10011	-0.130745	0.103605	-0.314383	0.298455	0.268757	0.129477	0.358176	0.0449439	0.0903139	0.162885	0.318032	0.178801	0.194928	0.0102421	0.0335889	0.580345	-0.0815314	FALSE	0.857635	0.0275356	FALSE	0.474095	-0.0539958	FALSE	FALSE	static	0.225264	-0.0492862	0.160602	0.787763	-1.12503	0.337262	0.787763
chr1	107760001	107770000	-1.30319	-1.18816	-1.23733	-1.12345	-0.886383	-0.665438	-1.25543	-0.849161	-0.858041	-0.933309	-0.668102	-0.956238	-0.660143	-0.850586	-0.567338	-0.602693	-1.12738	-1.02532	-0.790062	-1.07291	-1.02324	-0.748377	-0.940043	-0.894769	0.0672832	0.301511	FALSE	0.0753915	-0.190707	FALSE	0.415521	0.110804	FALSE	FALSE	static	-1.0446	-0.775844	-0.882023	-1.06218	0.923302	0.138878	0.923302
chr1	107800001	107810000	-0.424607	-0.374026	-0.311427	-0.346067	-0.15222	-0.0997319	-0.680556	-0.220147	-0.165123	-0.180338	-0.152729	-0.284442	-0.0657627	-0.00659419	-0.119763	-0.101899	-0.310187	-0.281843	-0.368538	-0.0681649	-0.589906	-0.307332	-0.2685	-0.151987	0.106966	0.191516	FALSE	0.0921269	-0.158726	FALSE	0.801243	0.0327902	FALSE	FALSE	static	-0.257692	-0.136453	-0.248572	-0.643567	1.15206	-0.508497	1.15206
chr1	108150001	108160000	-0.407872	-0.426074	-0.311866	-0.256942	-0.456694	-0.419711	-0.523668	-0.530668	-0.257526	-0.258498	-0.244671	-0.411029	-0.179874	-0.435696	-0.388497	-0.377177	-0.274307	-0.522449	-0.312381	-0.368331	-0.464895	-0.184372	-0.251187	-0.25677	0.188294	0.097566	FALSE	0.912191	-0.0102156	FALSE	0.234906	0.0873504	FALSE	FALSE	static	-0.357583	-0.269307	-0.225634	-1.09207	0.22118	0.870894	0.870894
chr1	108690001	108700000	-0.187261	-0.395527	-0.557939	-0.602598	-0.414874	-0.335641	-0.199425	-0.313196	-0.0535185	-0.373888	-0.290882	-0.31202	-0.487437	-0.543198	-0.359441	-0.079221	-0.0347794	-0.235963	-0.0289223	-0.24982	-0.52251	-0.189056	-0.4652	-0.238577	0.643405	0.0633569	FALSE	0.630539	0.0668471	FALSE	0.256066	0.130204	FALSE	FALSE	static	-0.348575	-0.291363	-0.205812	-0.927758	-0.131477	1.05923	1.05923
chr1	108930001	108940000	-0.028239	-0.304221	0.0133782	0.0499611	-0.111942	-0.289929	-0.154099	-0.1902	-0.160557	-0.062324	-0.041172	0.0313365	-0.147094	-0.113563	-0.312516	-0.0689181	-0.252981	-0.0997428	-0.422564	-0.226182	-0.0686946	-0.111189	-0.219033	-0.0629684	0.872244	0.0175603	FALSE	0.384588	-0.0735684	FALSE	0.542158	-0.056008	FALSE	FALSE	static	-0.146718	-0.0199673	-0.0537986	-1.11569	0.815585	0.300103	0.815585
chr1	108940001	108950000	0.0794495	-0.185441	0.00792375	0.15703	-0.0862188	-0.26749	-0.0562315	-0.203986	-0.19373	0.0257619	0.0413771	0.11938	-0.0327986	-0.101227	-0.177682	0.0266109	-0.2288	-0.0236063	-0.366876	-0.212745	0.00896227	-0.115113	-0.227319	-0.0327058	0.775162	0.0328321	FALSE	0.202354	-0.113237	FALSE	0.413831	-0.0804051	FALSE	FALSE	static	-0.0729293	0.0536094	-0.0255599	-0.906737	1.07254	-0.165802	1.07254
chr1	109080001	109090000	0.03696	0.239914	0.24356	0.16534	0.0425254	0.0272071	0.0815972	-0.213162	-0.021742	0.0451898	-0.00413379	-0.0549227	0.136924	-0.0462491	0.0445074	0.215797	-0.202783	-0.0406844	0.0433129	0.070932	-0.121334	-0.153673	-0.128116	-0.0941917	0.717324	-0.0385714	FALSE	0.0927814	-0.117739	FALSE	0.0789471	-0.15631	FALSE	FALSE	static	0.101777	0.0705021	-0.144594	0.689998	0.456828	-1.14683	0.689998
chr1	109390001	109400000	-0.0457483	-0.0378418	-0.096696	-0.113234	-0.132374	-0.190673	-0.0925473	0.246293	-0.291283	-0.07747	-0.100577	-0.201347	-0.27342	-0.335751	-0.464102	-0.20958	-0.0917441	-0.378517	-0.384805	-0.186055	-0.170276	-0.0805416	-0.109897	-0.117246	0.0739418	-0.186338	FALSE	0.579517	0.054306	FALSE	0.138313	-0.132032	FALSE	FALSE	static	-0.0182205	-0.205223	-0.115421	1.01293	-0.986553	-0.0263722	1.01293
chr1	109420001	109430000	-0.130841	-0.353163	-0.256734	-0.126242	-0.162606	-0.163694	-0.087196	-0.134074	-0.299603	-0.240373	-0.31135	-0.246804	-0.181831	-0.192114	-0.348355	-0.152304	-0.262375	-0.635455	-0.275457	-0.495203	-0.293638	-0.177051	-0.315332	-0.238689	0.254785	-0.0697729	FALSE	0.312857	-0.0900583	FALSE	0.074917	-0.159831	FALSE	FALSE	static	-0.147507	-0.251926	-0.224105	1.11584	-0.815163	-0.300678	1.11584
chr1	109500001	109510000	0.336837	0.256572	0.169104	-0.00911356	0.20374	0.210319	0.167102	0.502233	0.255733	0.328626	0.172671	0.220195	-0.0827036	0.25152	-0.393618	0.0603044	0.109677	0.0958628	-0.0252374	0.322325	-0.178639	0.0865714	0.241235	0.249702	0.418885	-0.128008	FALSE	0.951814	0.0110961	FALSE	0.2794	-0.116912	FALSE	FALSE	static	0.269644	-0.196453	0.142391	0.820951	-1.1137	0.292753	0.820951
chr1	109550001	109560000	-0.0109798	-0.22182	-0.0459804	0.0675543	0.0359734	0.144434	0.0271379	-0.212164	0.0668064	-0.0735111	0.016048	-0.378545	-0.203916	0.108263	-0.0959962	-0.152721	-0.324429	-0.0735004	-0.0357096	-0.180826	-0.0166986	-0.0533657	0.118179	-0.194053	0.6054	-0.062216	FALSE	0.965423	-0.00585391	FALSE	0.470713	-0.0680699	FALSE	FALSE	static	-0.0233071	-0.228347	-0.0643768	0.756199	-1.13383	0.377626	0.756199
chr1	109770001	109780000	-0.460077	-0.505876	-0.482185	-0.431507	-1.10356	-0.592755	-0.445466	-0.763899	-0.688346	-0.495644	-0.617173	-0.735176	-0.756913	-0.789927	-0.447037	-0.627003	-0.744167	-0.628717	-0.384401	-0.436873	-0.377536	-0.382187	-0.35068	-0.320303	0.777618	-0.046487	FALSE	0.0629571	0.191544	FALSE	0.291847	0.145057	FALSE	FALSE	static	-0.541011	-0.595858	-0.379033	-0.31676	-0.803258	1.12002	1.12002
chr1	109780001	109790000	-0.391969	-0.533296	-0.411241	-0.394744	-1.11437	-0.539358	-0.330552	-0.647961	-0.598978	-0.444072	-0.487593	-0.641828	-0.673833	-0.756887	-0.391709	-0.56401	-0.648197	-0.491834	-0.303714	-0.327322	-0.323034	-0.30292	-0.336504	-0.274286	0.898229	-0.0244272	FALSE	0.04101	0.193887	FALSE	0.233902	0.16946	FALSE	FALSE	static	-0.469112	-0.532471	-0.300586	-0.292494	-0.821139	1.11363	1.11363
chr1	110020001	110030000	-0.629028	-0.950247	-1.00349	-0.881569	-0.629148	-0.785261	-0.926916	-0.659581	-0.492407	-0.53084	-0.645628	-0.314636	-0.752113	-0.516496	-0.613495	-0.639278	-0.253933	-0.230385	-0.450535	-0.527872	-0.509855	-0.537089	-0.417316	-0.544794	0.0415827	0.245043	FALSE	0.17021	0.129139	FALSE	0.00204932	0.374183	TRUE	TRUE	up.early	-0.764892	-0.52934	-0.529328	-1.1547	0.577303	0.577397	0.577397
chr1	110030001	110040000	-0.564011	-0.867448	-0.996604	-0.854536	-0.662365	-0.738076	-0.861428	-0.698969	-0.437049	-0.55537	-0.639624	-0.31657	-0.798704	-0.548959	-0.53128	-0.573759	-0.180026	-0.245394	-0.466787	-0.539994	-0.346308	-0.413353	-0.437361	-0.566513	0.0474446	0.230265	FALSE	0.136857	0.150697	FALSE	0.00150055	0.380962	TRUE	TRUE	up.early	-0.728908	-0.521357	-0.487197	-1.14482	0.441836	0.702979	0.702979
chr1	110040001	110050000	-0.41411	-0.627797	-0.864973	-0.709324	-0.547208	-0.58106	-0.673513	-0.699259	-0.290976	-0.488074	-0.461262	-0.263957	-0.709176	-0.44065	-0.354041	-0.430596	-0.0886208	-0.146096	-0.367702	-0.437323	-0.161352	-0.333498	-0.420249	-0.493372	0.0597779	0.209814	FALSE	0.247824	0.123815	FALSE	0.00434808	0.333629	TRUE	TRUE	up.early	-0.577885	-0.404108	-0.411027	-1.15399	0.612155	0.541831	0.612155
chr1	110050001	110060000	-0.228438	-0.286588	-0.528329	-0.465669	-0.37911	-0.326266	-0.513008	-0.548419	-0.108437	-0.306663	-0.249809	-0.137178	-0.536223	-0.287438	-0.159808	-0.233054	0.0511338	-0.0372311	-0.237405	-0.302916	0.000812424	-0.0929695	-0.300725	-0.314425	0.122434	0.157152	FALSE	0.357237	0.0981107	FALSE	0.0146754	0.255263	FALSE	FALSE	static	-0.351608	-0.230501	-0.273356	-1.08213	0.889994	0.192132	0.889994
chr1	110190001	110200000	-0.407333	-0.674297	-0.341614	-0.467716	-0.0137811	-0.321412	0.0210099	-0.169886	-0.210082	-0.161822	-0.0237347	-0.191182	-0.350746	-0.175656	-0.105715	-0.127275	-0.633937	-0.390412	-0.353732	-0.896794	-0.492739	-0.394754	-0.815395	-0.454472	0.370815	0.128602	FALSE	0.00834989	-0.385753	TRUE	0.0962928	-0.257151	FALSE	TRUE	down.late	-0.212042	-0.111365	-0.482065	0.294481	0.819693	-1.11417	0.819693
chr1	110500001	110510000	-0.530601	-0.246208	-0.160563	-0.140517	-0.375393	-0.099303	-0.270423	-0.137449	-0.123002	-0.096554	-0.207588	-0.0703812	-0.025642	-0.264441	-0.202166	-0.367109	-0.746886	-0.374239	-0.290504	-0.275133	-0.305591	-0.158611	-0.123918	-0.0524381	0.470238	0.0754469	FALSE	0.344819	-0.121305	FALSE	0.741658	-0.0458579	FALSE	FALSE	static	-0.156908	-0.123299	-0.281159	0.363348	0.767527	-1.13088	0.767527
chr1	110510001	110520000	-0.549764	-0.256487	-0.200754	-0.245331	-0.307966	-0.117611	-0.222278	-0.124183	-0.120576	-0.0762683	-0.272801	-0.0692466	-0.0841534	-0.297397	-0.182711	-0.364626	-0.798814	-0.296365	-0.346757	-0.27769	-0.314028	-0.15544	-0.146949	-0.0497491	0.491067	0.0695742	FALSE	0.401551	-0.114752	FALSE	0.752273	-0.0451774	FALSE	FALSE	static	-0.185571	-0.12794	-0.288053	0.184347	0.895	-1.07935	0.895
chr1	110790001	110800000	-0.133349	-0.0684245	-0.284055	-0.215454	-0.163888	-0.280229	-0.127785	-0.201612	-0.179619	-0.0621107	-0.19767	-0.171018	-0.0918961	-0.169202	-0.0990839	-0.495255	-0.181806	-0.357495	-0.440748	-0.136563	-0.261042	-0.425537	-0.347677	-0.557018	0.991188	0.00111763	FALSE	0.124515	-0.155254	FALSE	0.0631892	-0.154136	FALSE	FALSE	static	-0.108393	-0.135707	-0.260807	0.73719	0.401089	-1.13828	0.73719
chr1	111000001	111010000	0.141415	0.0109057	0.215241	0.111038	-0.0285152	0.180606	0.0824418	0.0145406	-0.0826854	0.0593545	-0.0284555	-0.0770503	-0.0561505	-0.0081572	0.106935	0.114487	0.0986893	-0.135546	-0.125442	-0.0767819	-0.084281	0.0660086	-0.208155	0.00512679	0.182287	-0.0874243	FALSE	0.384786	-0.0610825	FALSE	0.0351553	-0.148507	FALSE	FALSE	static	0.154464	0.030426	-0.00757936	1.12529	-0.338407	-0.786888	1.12529
chr1	111150001	111160000	-0.308089	-0.0159039	-0.114646	0.103518	-0.0761688	-0.282766	-0.336857	-0.418231	0.0766347	0.126267	0.10383	-0.187152	0.0126043	0.0450357	-0.137033	-0.0716627	-0.0250253	-0.0442711	0.230226	0.0419949	0.010824	0.0161045	0.144024	-0.00805349	0.146954	0.177209	FALSE	0.546766	0.0496625	FALSE	0.0389877	0.226871	FALSE	FALSE	static	-0.00931239	0.0743815	0.091336	-1.14032	0.412843	0.727479	0.727479
chr1	111220001	111230000	-0.282524	-0.227538	-0.177171	-0.497095	-0.404606	-0.184726	-0.14154	-0.32192	-0.114468	-0.15727	-0.345172	-0.149385	-0.261343	-0.199225	-0.313124	-0.303184	-0.320206	-0.184877	-0.335918	-0.147648	-0.102464	0.000701097	-0.171942	-0.0838613	0.572566	0.0492436	FALSE	0.419197	0.0621194	FALSE	0.177546	0.111363	FALSE	FALSE	static	-0.359007	-0.122435	-0.0796783	-1.14298	0.429398	0.713586	0.713586
chr1	111440001	111450000	-0.76366	-0.402311	-0.547546	-0.4783	-0.494452	-0.625935	-0.326291	-0.591133	-0.634198	-0.353236	-0.281226	-0.341367	-0.495305	-0.213874	-0.532873	-0.720022	-0.320569	-0.417922	-0.635583	-0.511244	-0.391975	-0.430008	-0.437578	-0.404877	0.52071	0.082191	FALSE	0.98446	0.00279278	FALSE	0.301008	0.0849837	FALSE	FALSE	static	-0.48001	-0.417236	-0.376831	-1.06396	0.143407	0.920554	0.920554
chr1	111450001	111460000	-0.814115	-0.421562	-0.627385	-0.49419	-0.56666	-0.636888	-0.43872	-0.639393	-0.618388	-0.301652	-0.29271	-0.359519	-0.441084	-0.196391	-0.499918	-0.780129	-0.322152	-0.515102	-0.618805	-0.639559	-0.463534	-0.456565	-0.462285	-0.403135	0.264149	0.14364	FALSE	0.697473	-0.0489179	FALSE	0.249565	0.0947221	FALSE	FALSE	static	-0.521533	-0.411892	-0.41587	-1.15411	0.609046	0.545064	0.609046
chr1	111520001	111530000	-0.202098	0.135154	0.0524504	0.126143	0.30527	0.0826053	0.0781611	0.199092	0.134036	0.0444863	0.101888	0.250303	0.0469678	0.117141	0.222515	0.176811	-0.29969	-0.158535	-0.212933	0.0473929	-0.0310807	-0.197276	0.0600458	0.123462	0.68911	0.0396712	FALSE	0.0271447	-0.220345	FALSE	0.0855163	-0.180674	FALSE	FALSE	static	0.125368	0.17129	0.0628871	0.101436	0.945416	-1.04685	0.945416
chr1	111760001	111770000	-1.17195	-0.587	-0.682867	-0.666845	-0.728926	-0.750202	-0.599084	-0.481955	-0.583746	-0.770543	-0.607405	-0.660102	-0.681842	-0.774438	-0.671789	-0.80893	-0.342431	-0.363406	-0.299864	-0.548275	-0.407895	-0.37467	-0.295217	-0.589367	0.927475	0.0137546	FALSE	0.00135014	0.292209	TRUE	0.0195057	0.305963	FALSE	TRUE	up.late	-0.662021	-0.64122	-0.318152	-0.63045	-0.522569	1.15302	1.15302
chr1	111770001	111780000	-1.37305	-0.665203	-0.770656	-0.793938	-0.905704	-0.858568	-0.692318	-0.515095	-0.65674	-0.951988	-0.754975	-0.741095	-0.796946	-0.862206	-0.793659	-0.869294	-0.489897	-0.496827	-0.388497	-0.621651	-0.470989	-0.492105	-0.378156	-0.717419	0.920227	0.0184531	FALSE	0.00161448	0.29642	TRUE	0.0386319	0.314873	FALSE	TRUE	up.late	-0.796376	-0.738465	-0.424605	-0.716022	-0.426517	1.14254	1.14254
chr1	112370001	112380000	-1.14669	-1.05321	-1.04187	-1.04637	-0.934611	-0.755558	-0.643676	-1.02666	-0.906836	-1.25998	-0.972478	-0.978243	-0.960086	-0.76983	-0.844729	-1.13714	-1.41048	-0.53099	-0.916476	-0.589425	-0.887218	-0.603863	-0.581688	-0.7813	0.882745	-0.0225845	FALSE	0.276261	0.190985	FALSE	0.320368	0.168401	FALSE	FALSE	static	-0.971257	-0.952696	-0.709698	-0.63977	-0.512594	1.15236	1.15236
chr1	112380001	112390000	-1.09916	-0.91537	-0.918115	-0.94465	-0.735475	-0.659313	-0.552274	-0.976499	-0.712088	-1.11778	-0.782502	-0.821193	-0.820628	-0.644921	-0.737719	-1.05954	-1.1853	-0.401589	-0.928913	-0.495991	-0.867349	-0.503317	-0.471373	-0.701013	0.937307	0.013062	FALSE	0.411598	0.142691	FALSE	0.347573	0.155753	FALSE	FALSE	static	-0.857878	-0.807891	-0.626599	-0.770424	-0.35966	1.13008	1.13008
chr1	112620001	112630000	-0.190694	-0.283657	-0.00764952	-0.166949	0.0578057	0.0334231	-0.545481	-0.199296	-0.116296	0.0992064	-0.0375129	0.11015	-0.0520347	-0.0248042	-0.209063	-0.251982	0.149721	0.111513	0.184621	-0.17483	-0.0150247	0.13674	-0.0293791	0.223084	0.445227	0.10252	FALSE	0.166403	0.133598	FALSE	0.0541693	0.236118	FALSE	FALSE	static	-0.0905271	0.0225172	0.12661	-1.01345	0.0274757	0.985979	0.985979
chr1	112710001	112720000	-0.933414	-1.08174	-0.988575	-0.978998	-1.07219	-0.704711	-0.541185	-0.877552	-0.705092	-0.71685	-0.854412	-0.749147	-0.961172	-0.917078	-0.830553	-0.735275	-1.01561	-0.810781	-0.884708	-0.601564	-0.735415	-0.613143	-0.644368	-0.669859	0.46265	0.0885983	FALSE	0.524041	0.0617663	FALSE	0.200126	0.150365	FALSE	FALSE	static	-0.847339	-0.902457	-0.657672	-0.349276	-0.778517	1.12779	1.12779
chr1	112720001	112730000	-0.746542	-0.853646	-0.73274	-0.808893	-0.883152	-0.586058	-0.44122	-0.633841	-0.639281	-0.589423	-0.763935	-0.599127	-0.770914	-0.834165	-0.702713	-0.58999	-0.761407	-0.734174	-0.83589	-0.453633	-0.579275	-0.578879	-0.50785	-0.628733	0.828861	0.0245679	FALSE	0.571707	0.0512133	FALSE	0.448107	0.0757813	FALSE	FALSE	static	-0.664152	-0.862236	-0.546908	0.169069	-1.07376	0.904688	0.904688
chr1	112820001	112830000	0.187428	0.108347	-0.104076	0.105933	0.318542	0.127521	0.100913	0.23609	0.0339448	0.11093	0.241316	0.0411845	0.15209	0.0444941	-0.0165918	0.187927	0.124439	-0.120688	-0.119258	-0.168413	-0.082042	-0.0665773	0.040757	0.136295	0.697072	-0.0356754	FALSE	0.0884028	-0.131348	FALSE	0.0515669	-0.167023	FALSE	FALSE	static	0.166315	0.138578	0.0410173	0.775117	0.353653	-1.12877	0.775117
chr1	113050001	113060000	-0.272828	-0.71703	-0.521278	-0.584426	-0.303663	-0.686856	-0.290069	-0.273044	-0.352303	-0.880432	-0.437709	-0.397349	-0.347125	-0.498027	-0.721594	-0.626191	-0.599195	-0.718479	-0.403135	-0.552222	-0.401972	-0.31911	-0.30644	-0.361546	0.636673	-0.0764419	FALSE	0.580414	0.0748288	FALSE	0.991473	-0.00161304	FALSE	FALSE	static	-0.484461	-0.445651	-0.342118	-0.820629	-0.293196	1.11382	1.11382
chr1	113060001	113070000	-0.416549	-0.878117	-0.56905	-0.714849	-0.372375	-0.834086	-0.447858	-0.492814	-0.471934	-1.04788	-0.596785	-0.486787	-0.419124	-0.749437	-0.800366	-0.710843	-0.572195	-0.709927	-0.449122	-0.646833	-0.618981	-0.432808	-0.392606	-0.524712	0.684545	-0.0696817	FALSE	0.357582	0.116996	FALSE	0.692378	0.0473141	FALSE	FALSE	static	-0.626902	-0.57803	-0.441687	-0.812902	-0.303755	1.11666	1.11666
chr1	113680001	113690000	-0.598039	-0.402748	-0.533856	-0.653142	-0.416418	-0.495734	-0.523557	-0.755691	-0.640811	-0.375524	-0.629543	-0.463094	-0.442273	-0.520175	-0.537552	-0.572027	-0.609122	-0.582928	-0.728966	-0.330278	-0.541403	-0.402883	-0.567722	-0.371078	0.794191	0.0247731	FALSE	0.955734	0.00582749	FALSE	0.754183	0.0306006	FALSE	FALSE	static	-0.5382	-0.474318	-0.426425	-1.04413	0.0950432	0.949085	0.949085
chr1	113690001	113700000	-0.558905	-0.353184	-0.543247	-0.640272	-0.385446	-0.447229	-0.412768	-0.777208	-0.516637	-0.305123	-0.595906	-0.447129	-0.514389	-0.469376	-0.543834	-0.553505	-0.660836	-0.538244	-0.746923	-0.223207	-0.454284	-0.436781	-0.486505	-0.374875	0.842874	0.0215451	FALSE	0.98137	0.0030305	FALSE	0.838737	0.0245756	FALSE	FALSE	static	-0.496024	-0.436505	-0.388449	-1.03356	0.0709008	0.962663	0.962663
chr1	113960001	113970000	-0.653962	-0.683335	-0.713224	-0.634373	-0.928598	-1.02535	-0.689506	-0.355098	-0.678932	-0.388705	-0.493907	-0.562917	-0.508644	-0.799227	-0.80735	-0.710001	-0.367078	-0.469714	-0.0612291	-0.552524	-0.676267	-0.534939	-0.357896	-0.470125	0.525841	0.0917201	FALSE	0.141631	0.182489	FALSE	0.046795	0.274209	FALSE	FALSE	static	-0.632652	-0.56073	-0.385324	-0.836473	-0.271137	1.10761	1.10761
chr1	113970001	113980000	-0.624422	-0.782319	-0.674761	-0.629822	-0.816993	-0.968866	-0.633782	-0.328281	-0.699427	-0.467555	-0.500889	-0.548318	-0.484352	-0.720269	-0.867564	-0.75875	-0.414784	-0.448734	-0.119692	-0.562796	-0.748542	-0.604665	-0.364362	-0.494852	0.723543	0.0515151	FALSE	0.193033	0.161087	FALSE	0.102656	0.212603	FALSE	FALSE	static	-0.616447	-0.578449	-0.42003	-0.750039	-0.385298	1.13534	1.13534
chr1	114310001	114320000	-0.106618	-0.0107912	-0.153876	-0.263814	-0.318071	-0.138983	-0.236301	-0.0652494	-0.389362	-0.13949	-0.111794	-0.058723	-0.186558	-0.312353	-0.359105	-0.152044	-0.349148	-0.328032	-0.288242	-0.277272	-0.633376	-0.593619	-0.303683	-0.248382	0.579002	-0.0519658	FALSE	0.103891	-0.164041	FALSE	0.0252809	-0.216006	FALSE	FALSE	static	-0.131679	-0.166505	-0.270379	0.801605	0.31897	-1.12057	0.801605
chr1	114320001	114330000	-0.0810186	0.00645349	-0.198142	-0.294673	-0.541316	-0.0706525	-0.300414	-0.139472	-0.431892	-0.128629	-0.133233	-0.105539	-0.167443	-0.437729	-0.339983	-0.233247	-0.428085	-0.411101	-0.357896	-0.275355	-0.655063	-0.59477	-0.292246	-0.253926	0.743056	-0.0448074	FALSE	0.124326	-0.161343	FALSE	0.0718213	-0.206151	FALSE	FALSE	static	-0.138746	-0.201058	-0.293408	0.929439	0.128667	-1.05811	0.929439
chr1	114710001	114720000	-0.374883	-0.499883	-0.299648	-0.272528	-0.103295	-0.143272	-0.186086	-0.268663	-0.167014	-0.112874	-0.27522	-0.0622152	-0.286253	-0.401565	-0.473576	-0.36507	-0.294403	-0.465374	-0.172411	-0.213993	-0.186304	-0.600244	-0.00307168	-0.148313	0.996341	0.000558879	FALSE	0.960911	0.00745901	FALSE	0.952663	0.00801789	FALSE	FALSE	static	-0.251358	-0.200693	-0.142676	-0.976704	-0.0450683	1.02177	1.02177
chr1	114720001	114730000	-0.299508	-0.395113	-0.252757	-0.237612	-0.0902626	-0.0925851	-0.227312	-0.195307	-0.112277	-0.0478695	-0.240276	-0.0177971	-0.373207	-0.345862	-0.381934	-0.176288	-0.378654	-0.527595	-0.100299	-0.156697	-0.202294	-0.474264	0.0153387	-0.163042	0.921725	0.0118683	FALSE	0.798555	-0.0364996	FALSE	0.8384	-0.0246313	FALSE	FALSE	static	-0.195501	-0.14802	-0.123658	-1.08864	0.210923	0.877714	0.877714
chr1	114950001	114960000	-0.0171132	-0.0523135	0.116661	0.0499404	0.0536076	-0.299645	-0.0662891	0.189154	0.147018	-0.0781214	0.0492086	-0.0947066	0.0408831	-0.0824496	-0.457441	-0.0128296	-0.0691478	-0.185165	-0.433042	-0.2846	-0.110045	-0.187987	-0.136102	0.0202892	0.679577	-0.0578051	FALSE	0.348137	-0.11217	FALSE	0.0897676	-0.169975	FALSE	FALSE	static	0.0524468	0.00677446	-0.099206	0.845445	0.258392	-1.10384	0.845445
chr1	115130001	115140000	-0.821483	-0.611267	-0.762719	-0.833134	-0.574494	-0.716792	-0.59957	-0.600707	-0.565429	-0.446841	-0.442858	-0.592968	-0.747113	-0.879413	-0.871572	-0.358271	-0.665179	-0.710063	-0.552544	-0.629507	-0.45832	-0.641364	-0.575079	-0.628924	0.559771	0.0769627	FALSE	0.969549	0.00543568	FALSE	0.206186	0.0823984	FALSE	FALSE	static	-0.674214	-0.528916	-0.504286	-1.14427	0.438024	0.706245	0.706245
chr1	115470001	115480000	0.0675681	0.0284961	-0.0776353	-0.0423796	-0.73358	-0.0551725	-0.224087	0.185906	0.0506418	0.077177	-0.118174	-0.213252	0.0878442	0.0572358	0.267349	-0.13749	-0.0807024	-0.151757	-0.232835	-0.33417	-0.180324	-0.149617	-0.0310731	-0.209186	0.532576	0.115277	FALSE	0.0657987	-0.180125	FALSE	0.681375	-0.0648477	FALSE	FALSE	static	-0.0576109	0.0945468	-0.117641	-0.280768	1.11037	-0.829604	1.11037
chr1	115590001	115600000	-0.426615	-0.516995	-0.421391	-0.291684	-0.338848	-0.350231	-0.0377132	-0.168891	-0.202007	-0.148025	-0.231765	-0.193717	-0.189483	-0.266633	-0.135006	-0.0105171	-0.327879	-0.251012	-0.235596	-0.415457	-0.337866	-0.515699	-0.32631	-0.707469	0.140872	0.146902	FALSE	0.0307739	-0.217517	FALSE	0.524957	-0.0706152	FALSE	FALSE	static	-0.297507	-0.153743	-0.317513	-0.461752	1.14744	-0.685687	1.14744
chr1	115600001	115610000	-0.543578	-0.628712	-0.554128	-0.426944	-0.503651	-0.357983	-0.06489	-0.190646	-0.257883	-0.182883	-0.372839	-0.288064	-0.296984	-0.299626	-0.262244	-0.116121	-0.371258	-0.23896	-0.293278	-0.427683	-0.405653	-0.463612	-0.350925	-0.790984	0.217535	0.149236	FALSE	0.114147	-0.158214	FALSE	0.952603	-0.00897766	FALSE	FALSE	static	-0.401263	-0.231539	-0.365942	-0.763216	1.13203	-0.368809	1.13203
chr1	115780001	115790000	-0.524497	-0.604115	-0.541035	-0.298705	-0.331349	-0.68082	-0.398628	-0.47958	-0.304811	-0.280081	-0.341736	-0.396405	-0.597148	-0.422072	-0.330141	-0.277859	-0.386266	-0.621491	-0.560455	-0.332014	-0.658272	-0.634466	-0.415946	-0.567069	0.227278	0.11356	FALSE	0.0751715	-0.153216	FALSE	0.680444	-0.0396562	FALSE	FALSE	static	-0.362285	-0.297388	-0.639266	0.389347	0.746765	-1.13611	0.746765
chr1	116040001	116050000	-0.065775	0.0843494	-0.0523452	-0.0887633	-0.0946921	-0.178091	-0.0522004	-0.217493	0.0919934	-0.101667	0.0190256	-0.149791	-0.340765	-0.0468243	0.00963472	-0.457548	-0.0369176	0.0947162	-0.000294338	0.142476	-0.0882341	0.0435448	0.0822428	-0.155485	0.767617	-0.0388665	FALSE	0.243415	0.132249	FALSE	0.160449	0.0933824	FALSE	FALSE	static	-0.0375891	-0.0212747	0.088618	-0.692095	-0.454423	1.14652	1.14652
chr1	116110001	116120000	-0.418122	-0.250362	-0.224811	-0.269075	-0.268123	-0.187517	-0.703294	-0.417625	-0.324071	-0.219493	-0.319605	-0.295167	-0.317623	-0.326665	-0.361874	-0.372563	-0.25062	-0.432428	-0.38259	-0.353392	-0.42396	-0.240762	-0.29492	-0.382754	0.824097	0.0252334	FALSE	0.567586	-0.0280456	FALSE	0.980572	-0.00281222	FALSE	FALSE	static	-0.262901	-0.277772	-0.316914	0.822974	0.289965	-1.11294	0.822974
chr1	116120001	116130000	-0.610813	-0.460196	-0.407617	-0.460846	-0.410887	-0.36186	-0.747219	-0.501621	-0.458983	-0.359917	-0.549355	-0.500846	-0.447696	-0.442174	-0.437547	-0.389425	-0.366522	-0.573652	-0.516149	-0.493677	-0.504062	-0.369021	-0.405279	-0.395253	0.566072	0.0468894	FALSE	0.939146	-0.00470901	FALSE	0.582517	0.0421804	FALSE	FALSE	static	-0.429097	-0.424965	-0.416577	-0.870109	-0.222351	1.09246	1.09246
chr1	116370001	116380000	-0.0147159	0.137841	-0.150437	0.0847562	-0.152447	-0.0444386	0.0708614	-0.314866	-0.0804748	-0.304374	0.163311	0.0184787	0.143503	0.139995	0.0607953	0.197269	-0.103486	-0.0191936	-0.0727009	0.115679	-0.0363156	0.0264913	0.0628776	0.111361	0.478803	0.0902438	FALSE	0.774308	-0.0317239	FALSE	0.506027	0.0585199	FALSE	FALSE	static	0.0359433	0.129067	0.106667	-1.12363	0.792234	0.331396	0.792234
chr1	116500001	116510000	-0.423319	-0.629741	-0.66526	-0.613022	-0.430999	-0.519578	-0.442734	-0.494644	-0.402041	-0.377654	-0.624601	-0.432496	-0.46897	-0.865913	-0.640848	-0.534172	-0.540033	-0.7153	-0.545015	-0.468879	-0.365505	-0.372399	-0.467648	-0.37881	0.902225	-0.015925	FALSE	0.582342	0.0616384	FALSE	0.557518	0.0457134	FALSE	FALSE	static	-0.514542	-0.633387	-0.426243	0.0979555	-1.04537	0.947418	0.947418
chr1	116510001	116520000	-0.320375	-0.432062	-0.52069	-0.462402	-0.360461	-0.389293	-0.337487	-0.415825	-0.24365	-0.190632	-0.460196	-0.238154	-0.283276	-0.708561	-0.550876	-0.471283	-0.4087	-0.567667	-0.425317	-0.337497	-0.23455	-0.183399	-0.319544	-0.236254	0.93143	0.0114958	FALSE	0.666923	0.0542124	FALSE	0.360869	0.0657081	FALSE	FALSE	static	-0.379274	-0.467732	-0.290271	-0.0020477	-0.998975	1.00102	1.00102
chr1	116560001	116570000	-0.227346	-0.415114	-0.387295	-0.880401	-0.714183	-0.709126	-0.449886	-0.550052	-0.398385	-0.144252	-0.277344	-0.289035	-0.131774	-0.391633	-0.0366892	-0.685239	-0.194041	-0.466023	-0.360876	-0.409546	-0.197803	-0.321665	-0.0831866	-0.241996	0.133034	0.247382	FALSE	0.948095	0.00990175	FALSE	0.047904	0.257283	FALSE	FALSE	static	-0.447707	-0.268567	-0.216696	-1.12796	0.350003	0.777954	0.777954
chr1	116570001	116580000	-0.245963	-0.485511	-0.419492	-0.922547	-0.751921	-0.736445	-0.415755	-0.630003	-0.417488	-0.159226	-0.347246	-0.362597	-0.269762	-0.341917	-0.101774	-0.857714	-0.362126	-0.538771	-0.590657	-0.389529	-0.249945	-0.288963	-0.113141	-0.325888	0.214767	0.218739	FALSE	0.999284	-0.000162131	FALSE	0.106012	0.218577	FALSE	FALSE	static	-0.475282	-0.322545	-0.282503	-1.13212	0.369256	0.762862	0.762862
chr1	116730001	116740000	-0.156307	-0.173625	-0.373748	-0.174608	-0.129353	-0.107111	-0.199251	-0.0640266	-0.0200723	-0.0847793	0.0135895	-0.10114	-0.246193	-0.166035	0.0428781	0.0132254	-0.145871	-0.270902	0.0599715	-0.063514	-0.0354911	-0.0391101	-0.327775	-0.257615	0.170832	0.103688	FALSE	0.472099	-0.0664726	FALSE	0.67077	0.0372155	FALSE	FALSE	static	-0.109751	-0.0130798	-0.0715173	-0.923636	1.06196	-0.138325	1.06196
chr1	116850001	116860000	0.309532	0.231435	0.256122	0.309852	0.206524	0.262056	0.204599	0.108147	0.1478	0.0399749	0.132999	-0.0410633	0.10053	0.11563	0.00332009	0.162824	-0.0642134	0.172333	0.272038	0.261115	0.0678118	0.355968	0.359844	0.415087	0.0145597	-0.153282	FALSE	0.129077	0.147246	FALSE	0.953513	-0.00603537	FALSE	FALSE	static	0.275277	0.0973945	0.289059	0.511689	-1.1523	0.64061	0.64061
chr1	117050001	117060000	-0.769923	-0.857173	-0.787716	-0.830559	-0.587867	-0.890415	-0.797424	-0.758786	-0.914708	-0.640782	-0.823522	-0.562119	-0.649408	-0.613328	-0.703139	-0.761453	-0.960987	-1.06892	-0.772855	-0.937032	-0.738003	-0.505468	-0.810221	-0.637245	0.355706	0.0764253	FALSE	0.415004	-0.0952841	FALSE	0.871039	-0.0188588	FALSE	FALSE	static	-0.740358	-0.617189	-0.882752	0.0482173	0.975019	-1.02324	0.975019
chr1	117060001	117070000	-0.719553	-0.814333	-0.738893	-0.750464	-0.551805	-1.0577	-0.828871	-0.760066	-0.893375	-0.557429	-0.8198	-0.52886	-0.630361	-0.582245	-0.669751	-0.822939	-0.821958	-0.959347	-0.755168	-0.94852	-0.740372	-0.526553	-0.808457	-0.589397	0.418622	0.0896154	FALSE	0.470819	-0.0806263	FALSE	0.941476	0.00898909	FALSE	FALSE	static	-0.710092	-0.585055	-0.75811	-0.287364	1.11222	-0.824857	1.11222
chr1	117290001	117300000	-0.0677481	0.10277	-0.196795	0.101128	-0.230953	0.175684	-0.129117	-0.140592	0.0450189	-0.115827	0.0309637	0.00279931	-0.0489844	-0.02656	0.133849	-0.230503	-0.327116	-0.421674	-0.454282	-0.358314	-0.14909	-0.210579	-0.407544	-0.131568	0.856411	0.0220474	FALSE	0.0049447	-0.281365	TRUE	0.0156192	-0.259318	FALSE	TRUE	down.late	-0.00880676	0.0139746	-0.263889	0.501938	0.649611	-1.15155	0.649611
chr1	117480001	117490000	-0.17703	-0.111526	-0.233746	-0.00741465	-0.0272186	-0.442964	-0.163775	-0.331782	-0.185345	-0.100599	0.0710301	-0.180534	0.00186356	-0.418759	0.00686462	-0.403991	-0.396914	-0.0434713	0.0194188	-0.273967	-0.19072	0.0449603	0.0810183	-0.293688	0.812862	0.0357482	FALSE	0.902625	0.0195135	FALSE	0.649892	0.0552617	FALSE	FALSE	static	-0.110834	-0.0984215	0.00438114	-0.672698	-0.476429	1.14913	1.14913
chr1	117490001	117500000	-0.271978	-0.219995	-0.410239	-0.15175	-0.175987	-0.521489	-0.2795	-0.472103	-0.284017	-0.177807	-0.0866658	-0.368535	-0.119892	-0.439984	-0.0945353	-0.438547	-0.495133	-0.279338	-0.10222	-0.27689	-0.267823	-0.0885533	-0.0619646	-0.416314	0.609458	0.0616321	FALSE	0.985818	0.00271834	FALSE	0.545693	0.0643504	FALSE	FALSE	static	-0.236989	-0.227625	-0.126503	-0.652086	-0.499238	1.15132	1.15132
chr1	117760001	117770000	-0.211632	-0.171624	-0.0895719	-0.130412	-0.19773	-0.237979	-0.197708	-0.114042	0.0792001	-0.0575368	0.166016	0.0436724	0.237122	-0.225776	-0.0936864	0.0928249	-0.274701	-0.325785	0.0260755	-0.127464	-0.0655759	0.0175119	-0.343809	-0.262755	0.053067	0.199067	FALSE	0.0729309	-0.199792	FALSE	0.994019	-0.000725405	FALSE	FALSE	static	-0.238067	0.0931805	-0.114776	-0.905	1.07357	-0.168573	1.07357
chr1	117910001	117920000	-0.35668	-0.492806	-0.0785586	-0.378676	-0.199678	-0.415621	-0.0863635	-0.457461	-0.399126	-0.635885	-0.335084	-0.411796	-0.308085	-0.21646	-0.554037	-0.427842	-0.35474	-0.0844658	-0.0781322	-0.408245	-0.19567	-0.309644	-0.271577	-0.35221	0.384339	-0.102809	FALSE	0.105661	0.154204	FALSE	0.633441	0.051395	FALSE	FALSE	static	-0.291272	-0.519311	-0.231573	0.369517	-1.13217	0.762655	0.762655
chr1	117920001	117930000	-0.350294	-0.473331	-0.089989	-0.557131	-0.199869	-0.410855	-0.162471	-0.424166	-0.449411	-0.8448	-0.403357	-0.428934	-0.440857	-0.247861	-0.586018	-0.524079	-0.288137	-0.270946	-0.0907847	-0.394607	-0.245761	-0.342119	-0.384061	-0.518176	0.234816	-0.157151	FALSE	0.121201	0.173841	FALSE	0.886972	0.0166894	FALSE	FALSE	static	-0.308229	-0.59799	-0.300902	0.555597	-1.15443	0.598834	0.598834
chr1	117940001	117950000	-0.358305	-0.505543	-0.192028	-0.655812	-0.245655	-0.320982	-0.283039	-0.359374	-0.497577	-1.2336	-0.437467	-0.391232	-0.701856	-0.36679	-0.48356	-0.623911	-0.398423	-0.75862	-0.170273	-0.225874	-0.307116	-0.489159	-0.426359	-0.657671	0.211397	-0.226907	FALSE	0.3783	0.162812	FALSE	0.625269	-0.0640946	FALSE	FALSE	static	-0.34073	-0.606878	-0.410939	0.812841	-1.11668	0.303838	0.812841
chr1	118060001	118070000	-0.32792	-0.651247	-0.125628	-0.183441	-0.0215649	-0.515555	-0.297563	0.0373895	-0.317959	-0.352558	-0.124286	-0.192052	-0.0500419	-0.365548	0.0026182	-0.0292105	-0.0877569	-0.221609	-0.57559	0.000324862	-0.045772	-0.251712	-0.0782852	-0.207765	0.62218	0.0820614	FALSE	0.975557	-0.00489087	FALSE	0.619362	0.0771705	FALSE	FALSE	static	-0.213041	-0.115897	-0.252896	-0.270992	1.10757	-0.836575	1.10757
chr1	119280001	119290000	-0.172905	-0.0999662	-0.365244	-0.0263684	-0.0348456	-0.115223	-0.302666	-0.0324667	-0.104997	-0.119844	-0.0411037	-0.0769612	-0.08259	-0.0816725	-0.0726909	-0.0738481	-0.311951	-0.129802	-0.262217	-0.110701	-0.553299	-0.341643	-0.358472	-0.202392	0.416366	0.0619973	FALSE	0.0296654	-0.202096	FALSE	0.139199	-0.140099	FALSE	FALSE	static	-0.256531	-0.0366169	-0.189722	-0.847714	1.10285	-0.255139	1.10285
chr1	119520001	119530000	-0.126711	-0.0207661	0.177372	0.013375	0.356792	0.17563	0.371318	0.122675	0.190529	0.139142	0.0390153	0.0186486	-0.252257	0.244879	0.219517	0.126035	0.0841223	0.359347	0.150391	0.276397	0.118533	0.0192578	0.211146	-0.181575	0.771094	-0.043022	FALSE	0.774308	0.0390138	FALSE	0.97847	-0.0040082	FALSE	FALSE	static	0.202792	0.158436	0.0424516	0.82412	0.288383	-1.1125	0.82412
chr1	119530001	119540000	-0.140878	-0.0693632	0.0869832	-0.0399062	0.258132	0.108171	0.352989	-0.0180604	0.168734	0.0570565	-0.023509	-0.10093	-0.298216	0.199216	0.183576	0.0855662	-0.0511675	0.261335	0.148414	0.201053	0.0244205	-0.0478367	0.145479	-0.209689	0.828493	-0.0333217	FALSE	0.859502	0.0250644	FALSE	0.95171	-0.00825726	FALSE	FALSE	static	0.144651	0.08711	-0.0334923	0.86414	0.231215	-1.09535	0.86414
chr1	119620001	119630000	0.465346	0.351225	0.45516	0.261459	0.24024	0.034494	0.0512677	0.325007	0.287168	0.311839	0.140733	0.223697	0.504206	0.323337	0.342449	0.365421	0.196588	0.0334953	0.390494	-0.267918	0.100606	0.193327	0.0770646	-0.0832816	0.743136	0.0393312	FALSE	0.0595095	-0.232309	FALSE	0.12727	-0.192978	FALSE	FALSE	static	0.361452	0.381967	0.195501	0.474122	0.674754	-1.14888	0.674754
chr1	119740001	119750000	-0.0376211	-0.176865	-0.285786	-0.0382005	-0.412661	0.0581066	-0.250125	-0.0223334	-0.0331393	0.0283798	0.104004	0.0376523	0.0573243	-0.319045	-0.238416	0.152814	-0.148676	-0.133756	-0.0493736	0.29061	0.105185	0.165607	0.169907	0.150499	0.352087	0.119383	FALSE	0.441862	0.0950536	FALSE	0.0601581	0.214436	FALSE	FALSE	static	-0.028189	0.175944	0.169974	-1.15432	0.602855	0.551464	0.602855
chr1	119850001	119860000	-0.375481	0.0671211	-0.0346946	-0.0116418	-0.0573349	0.0118284	0.184054	-0.583639	-0.353284	0.0539715	-0.0400402	-0.387731	-0.339215	0.199456	0.0646495	-0.245932	-0.0505088	-0.0253253	-0.21355	-0.341525	-0.105496	-0.0997636	-0.246671	-0.100863	0.891246	-0.0310422	FALSE	0.914337	-0.0169473	FALSE	0.748015	-0.0479894	FALSE	FALSE	static	0.0489132	0.129459	0.15449	-1.12459	0.335432	0.789161	0.789161
chr1	119930001	119940000	0.0513027	0.261542	-0.280062	0.0839098	0.10507	-0.692837	0.00302696	-0.316435	0.0114594	-0.168848	0.059986	0.602298	-0.291851	-0.815017	-0.00372456	-0.327843	0.25516	-0.389773	-0.467157	-0.00552012	-0.0515816	-0.23421	-0.0194005	-0.238805	0.956878	-0.0186322	FALSE	0.925159	-0.0272184	FALSE	0.831961	-0.0458506	FALSE	FALSE	static	-0.0207397	-0.313208	0.167575	0.143305	-1.06392	0.920616	0.920616
chr1	119980001	119990000	0.376659	0.362145	-1.15582	0.471838	1.42208	1.26442	-2.04383	1.23204	-0.622406	0.518228	0.837033	1.69529	-0.261259	0.0481161	-0.694781	-1.82908	0.910489	2.20172	-2.8387	0.147932	-2.07023	-0.660548	-0.585357	1.26591	0.785708	-0.279798	FALSE	0.894404	-0.16499	FALSE	0.688186	-0.444789	FALSE	FALSE	static	-0.682672	-0.750641	-0.938429	0.814569	0.301488	-1.11606	0.814569
chr1	149890001	149900000	-0.32763	0.161409	-0.573349	-0.307126	0.123345	-0.0781962	0.279011	-0.738063	0.240853	-0.158685	0.356228	-0.630978	0.313714	-0.583372	-0.607465	0.398122	0.0677324	0.102923	-0.169058	-0.44305	0.37583	0.420132	-0.0495636	0.198438	0.791652	0.0986271	FALSE	0.632643	0.146871	FALSE	0.28407	0.245498	FALSE	FALSE	static	-0.342634	-0.226996	-0.411934	-0.165325	1.07236	-0.907035	1.07236
chr1	150210001	150220000	-0.506241	-0.447637	-0.402555	-0.37113	-0.567167	-0.603508	-0.600026	-0.447976	-0.596175	-0.26636	-0.189715	-0.145751	-0.557009	-0.594595	-0.245667	-0.514354	-0.441771	-0.256373	-0.886501	-0.262398	-0.284731	-0.159965	-0.509096	-0.126463	0.389472	0.104577	FALSE	0.907124	0.022791	FALSE	0.341863	0.127368	FALSE	FALSE	static	-0.453027	-0.344041	-0.142422	-0.887527	-0.19594	1.08347	1.08347
chr1	150220001	150230000	-0.53168	-0.497568	-0.410965	-0.452375	-0.576649	-0.666628	-0.572492	-0.455728	-0.609005	-0.254624	-0.214681	-0.204067	-0.534287	-0.549032	-0.264993	-0.537387	-0.463717	-0.229324	-0.727306	-0.30411	-0.245677	-0.190003	-0.390482	-0.0907348	0.257931	0.124501	FALSE	0.659055	0.0658404	FALSE	0.09025	0.190341	FALSE	FALSE	static	-0.482089	-0.365045	-0.112196	-0.858542	-0.239444	1.09799	1.09799
chr1	151000001	151010000	-0.0946545	-0.180657	-0.175236	-0.136112	-0.167547	-0.259089	-0.342259	0.000394397	-0.211304	-0.280092	-0.177986	-0.215133	0.152755	0.155619	0.122234	0.0634152	0.0833389	-0.258652	-0.105438	-0.144521	0.0373558	0.134417	-0.00940255	-0.0486524	0.31767	0.120583	FALSE	0.945791	0.00986739	FALSE	0.109561	0.130451	FALSE	FALSE	static	-0.136838	-0.0423992	-0.00671493	-1.1133	0.291285	0.822017	0.822017
chr1	151200001	151210000	0.313972	0.208687	0.38502	0.206249	0.211613	0.13463	0.0723596	0.260909	0.255537	0.357396	0.206922	0.33068	0.275412	0.235865	0.193052	0.166332	0.0743153	0.104565	0.129188	0.251593	0.343089	0.213754	0.283167	0.278171	0.689357	0.0284696	FALSE	0.505029	-0.0429193	FALSE	0.849399	-0.0144497	FALSE	FALSE	static	0.279841	0.315644	0.280905	-0.603279	1.15431	-0.551028	1.15431
chr1	151260001	151270000	-0.110041	-0.0742112	0.108077	-0.142786	-0.274382	0.0936258	-0.0373382	0.0937652	0.128139	-0.0221006	-0.0936894	0.0368231	0.104657	0.11082	0.0698302	0.101911	-0.134817	0.0216027	-0.119062	0.0208794	0.251389	0.225874	-0.210133	0.134435	0.266214	0.0974602	FALSE	0.784073	-0.0307777	FALSE	0.549037	0.0666825	FALSE	FALSE	static	0.000353328	0.0543998	0.138451	-0.920364	-0.143721	1.06408	1.06408
chr1	151840001	151850000	-0.169532	-0.298208	-0.00105403	-0.161388	-0.210604	-0.177365	-0.00275029	-0.225293	-0.227175	-0.114762	-0.0851104	-0.0332567	-0.147257	0.0649689	-0.345776	-0.261227	-0.0919819	-0.0219715	-0.1173	-0.175769	-0.0849789	-0.150587	0.0178978	-0.0409005	0.915374	0.012075	FALSE	0.450354	0.0605005	FALSE	0.236951	0.0725755	FALSE	FALSE	static	-0.10581	-0.0638969	0.00496701	-0.909971	-0.160615	1.07059	1.07059
chr1	151850001	151860000	-0.226846	-0.37448	-0.00751017	-0.214712	-0.273869	-0.221422	-0.0490518	-0.263879	-0.236062	-0.126889	-0.0687659	-0.0507026	-0.244742	0.0146634	-0.384795	-0.238657	-0.0787733	-0.0345565	-0.0438667	-0.0818596	-0.051941	-0.0647672	0.0261287	-0.0611363	0.734405	0.0369773	FALSE	0.122083	0.118147	FALSE	0.0324823	0.155125	FALSE	FALSE	static	-0.150255	-0.0838936	0.0411557	-0.884054	-0.201274	1.08533	1.08533
chr1	152040001	152050000	-0.990857	-0.954309	-0.964413	-1.05935	-0.843803	-0.926167	-1.19272	-0.799054	-1.00594	-1.11958	-0.874621	-1.05142	-1.14939	-1.00586	-0.773353	-1.02174	-0.584341	-0.837511	-0.721815	-0.914721	-0.491297	-0.639993	-0.246235	-0.719812	0.752026	-0.0339047	FALSE	0.0135328	0.355773	FALSE	0.017326	0.321868	FALSE	FALSE	static	-0.947976	-0.921781	-0.612711	-0.646165	-0.505683	1.15185	1.15185
chr1	152050001	152060000	-0.832293	-0.866264	-0.808071	-0.890895	-0.666731	-0.780867	-1.08547	-0.652525	-0.890994	-1.02395	-0.752903	-0.954178	-1.12704	-0.909746	-0.716116	-0.894437	-0.41771	-0.81747	-0.671464	-0.74554	-0.458908	-0.482162	-0.245745	-0.597414	0.423111	-0.0857813	FALSE	0.00925886	0.354119	TRUE	0.0285287	0.268338	FALSE	TRUE	up.late	-0.802037	-0.810903	-0.509086	-0.551347	-0.602969	1.15432	1.15432
chr1	152060001	152070000	-0.468415	-0.55864	-0.440379	-0.552501	-0.383997	-0.475788	-0.732011	-0.33915	-0.626846	-0.696741	-0.464998	-0.687706	-0.864402	-0.582977	-0.412395	-0.612031	-0.157872	-0.611085	-0.405366	-0.524129	-0.270346	-0.291987	-0.0623774	-0.410504	0.22667	-0.124652	FALSE	0.028437	0.276804	FALSE	0.164396	0.152152	FALSE	FALSE	static	-0.464628	-0.51027	-0.310185	-0.345871	-0.78115	1.12702	1.12702
chr1	152070001	152080000	0.0298441	-0.171802	0.0124479	-0.0958738	0.014524	-0.0992403	-0.372307	0.028634	-0.229107	-0.241902	-0.0393077	-0.228075	-0.432408	-0.241616	-0.0354165	-0.198846	0.113219	-0.171859	-0.00555634	-0.110921	0.0529219	0.0648301	0.246897	0.0193368	0.232676	-0.124113	FALSE	0.0198835	0.231943	FALSE	0.250277	0.10783	FALSE	FALSE	static	-0.037271	-0.09284	0.0690293	-0.205601	-0.88122	1.08682	1.08682
chr1	152200001	152210000	-0.22603	-0.248203	-0.251872	-0.257407	0.104184	0.0670492	-0.0129224	0.0992998	-0.156389	-0.404123	-0.191481	-0.219868	-0.362953	-0.169704	-0.332244	-0.20356	-0.578379	-0.818067	-0.236932	-0.430315	-0.410509	-0.216031	-0.195543	-0.276493	0.14272	-0.164303	FALSE	0.265592	-0.140243	FALSE	0.0322485	-0.304546	FALSE	FALSE	static	-0.0972056	-0.185587	-0.294446	0.963665	0.0690862	-1.03275	0.963665
chr1	152460001	152470000	-0.226998	-0.303752	-0.391543	-0.25878	-0.289301	-0.106518	-0.240238	-0.266346	-0.27182	-0.544353	-0.215493	-0.25556	-0.000377325	-0.507353	-0.183743	-0.208976	-0.437173	-0.48062	-0.635155	-0.589518	-0.211389	-0.270752	-0.128162	-0.581036	0.921725	-0.0130249	FALSE	0.290435	-0.143266	FALSE	0.142303	-0.156291	FALSE	FALSE	static	-0.243108	-0.257172	-0.326813	0.727087	0.413315	-1.1404	0.727087
chr1	152550001	152560000	0.125808	-0.0734733	0.0813011	0.272569	0.334281	0.141484	0.318711	0.380254	0.255323	0.0343044	0.157706	0.127123	0.218382	0.242064	0.0283	-0.758196	-0.227079	-0.00247016	0.279862	-0.0277714	0.363506	0.181709	0.552649	0.160114	0.44907	-0.159491	FALSE	0.597201	0.121939	FALSE	0.814997	-0.0375519	FALSE	FALSE	static	0.227186	-0.051053	0.00566391	1.13302	-0.759386	-0.373633	1.13302
chr1	152590001	152600000	0.529542	0.286245	0.733305	0.757416	0.710206	0.57501	0.617307	0.755726	0.507878	0.673353	0.755624	0.523629	0.76569	0.690781	0.169373	0.0284548	0.435109	0.4285	0.846559	0.417901	0.698149	0.488228	0.829064	0.696822	0.567399	-0.106247	FALSE	0.625631	0.0906937	FALSE	0.911598	-0.0155533	FALSE	FALSE	static	0.652718	0.33263	0.4261	1.10718	-0.837526	-0.26965	1.10718
chr1	152610001	152620000	0.399301	0.296811	0.706574	0.691259	0.665076	0.543869	0.591192	0.686237	0.427392	0.62241	0.759417	0.493764	0.625583	0.651283	0.144461	0.0928169	0.311629	0.24633	0.568089	-0.028856	0.56631	0.292946	0.544254	0.594231	0.566919	-0.0953991	FALSE	0.622291	-0.0902743	FALSE	0.162393	-0.185673	FALSE	FALSE	static	0.594851	0.309845	0.228588	1.12865	-0.353097	-0.77555	1.12865
chr1	152620001	152630000	0.226642	0.197104	0.494098	0.530625	0.583366	0.413579	0.402564	0.508663	0.294152	0.414515	0.59346	0.319408	0.478121	0.457904	0.0212113	-0.0453061	0.0392579	0.0818558	0.344466	-0.185066	0.427766	0.0724553	0.310649	0.383056	0.496088	-0.102897	FALSE	0.423663	-0.132378	FALSE	0.0714385	-0.235275	FALSE	FALSE	static	0.439992	0.12754	-0.0264802	1.09241	-0.222193	-0.870215	1.09241
chr1	152810001	152820000	0.359751	0.224256	0.327112	0.251603	0.109003	0.48547	0.247203	-0.060059	0.117615	0.142012	0.204795	0.262722	0.220278	-0.151029	-0.121709	0.27423	-0.0563372	0.131927	-0.00642006	0.114673	0.104282	0.35372	0.199145	0.446186	0.335589	-0.124428	FALSE	0.760939	0.0422828	FALSE	0.491782	-0.0821454	FALSE	FALSE	static	0.321037	0.176364	0.241651	1.03085	-0.965991	-0.0648603	1.03085
chr1	152860001	152870000	-0.094271	-0.113297	-0.324955	-0.318374	-0.259236	-0.103141	-0.164839	-0.393026	-0.287261	-0.0679612	-0.0857491	-0.112506	-0.122448	-0.0620539	-0.242866	-0.00895042	-0.495782	-0.568827	-0.152459	-0.240344	-0.181041	-0.102162	-0.194623	-0.204642	0.241379	0.0976678	FALSE	0.161705	-0.143761	FALSE	0.671572	-0.0460927	FALSE	FALSE	static	-0.168212	-0.0783669	-0.151725	-0.741067	1.13742	-0.396352	1.13742
chr1	152870001	152880000	0.127422	0.0443254	-0.148765	-0.127001	-0.101508	-0.0296617	0.0332119	-0.283111	-0.106186	0.0923623	0.0429272	0.0443816	0.120656	0.11821	-0.053471	0.2409	-0.292877	-0.234524	-0.0389365	-0.112259	0.0386088	0.00452143	0.015927	-0.0648857	0.191125	0.123109	FALSE	0.0808412	-0.148026	FALSE	0.797855	-0.0249172	FALSE	FALSE	static	0.00260096	0.104844	0.0247966	-0.771279	1.12985	-0.358569	1.12985
chr1	152940001	152950000	-0.173653	0.100738	-0.180209	-0.189939	0.0142529	-0.140679	0.0890897	-0.109097	-0.0944939	0.0119028	-0.161229	-0.0982566	-0.0427615	-0.0839079	-0.28456	-0.128179	-0.144612	0.211623	-0.0433053	0.0124503	0.126379	-0.0523477	0.161163	0.105609	0.687203	-0.0364986	FALSE	0.0523515	0.157306	FALSE	0.156894	0.120807	FALSE	FALSE	static	-0.0824191	-0.0408028	-0.0987489	-0.282103	1.11075	-0.828646	1.11075
chr1	153230001	153240000	-0.195994	-0.137649	-0.0399255	-0.175143	-0.084762	0.125321	-0.050812	-0.194667	-0.124217	-0.314438	-0.128238	-0.00708753	-0.240806	-0.224026	-0.356419	-0.182338	0.00417684	-0.0842583	-0.55713	-0.228417	-0.0590341	-0.116076	-0.29905	-0.0460925	0.231968	-0.102992	FALSE	0.85624	0.023961	FALSE	0.467106	-0.0790311	FALSE	FALSE	static	-0.0580643	-0.0711237	-0.118146	0.771524	0.358256	-1.12978	0.771524
chr1	153240001	153250000	-0.116951	-0.0980173	0.0195303	-0.0635832	0.00140506	0.229977	-0.00181194	-0.125087	-0.0950814	-0.291655	-0.144615	0.0736048	-0.173476	-0.194081	-0.382186	-0.194704	0.0853153	0.0301654	-0.508502	-0.182285	0.0579766	-0.0804696	-0.150819	-0.0221267	0.117463	-0.155957	FALSE	0.543462	0.0789313	FALSE	0.500416	-0.0770258	FALSE	FALSE	static	0.00674251	-0.0446751	-0.0339735	1.13202	-0.76324	-0.368779	1.13202
chr1	153480001	153490000	-0.385503	-0.350773	-0.629686	-0.338971	-0.362255	-0.314925	-0.302837	-0.619755	-0.283383	-0.502373	-0.472716	-0.347295	-0.342377	-0.358468	-0.330204	-0.709869	-0.493364	-0.394177	-0.360435	-0.333471	-0.102896	-0.291809	-0.0944712	-0.149204	0.967785	-0.0052474	FALSE	0.177519	0.140857	FALSE	0.164652	0.13561	FALSE	FALSE	static	-0.347676	-0.37512	-0.135319	-0.469636	-0.678736	1.14837	1.14837
chr1	153490001	153500000	-0.692614	-0.529586	-0.812153	-0.553368	-0.404601	-0.522487	-0.432517	-0.762127	-0.389374	-0.599252	-0.608213	-0.376846	-0.429219	-0.428818	-0.488567	-0.778864	-0.635883	-0.443134	-0.540669	-0.453935	-0.279914	-0.35961	-0.213292	-0.319743	0.513542	0.0762874	FALSE	0.299974	0.106622	FALSE	0.0742951	0.182909	FALSE	FALSE	static	-0.529967	-0.463842	-0.26826	-0.803005	-0.317098	1.1201	1.1201
chr1	153500001	153510000	-0.796688	-0.535492	-0.795762	-0.552767	-0.283659	-0.555294	-0.456454	-0.693904	-0.348847	-0.527876	-0.558442	-0.298404	-0.384797	-0.369727	-0.51569	-0.770663	-0.547271	-0.374303	-0.619188	-0.420761	-0.309498	-0.372012	-0.156815	-0.355396	0.386948	0.111946	FALSE	0.49639	0.0774006	FALSE	0.0904614	0.189347	FALSE	FALSE	static	-0.533533	-0.418038	-0.265532	-0.950948	-0.0917772	1.04272	1.04272
chr1	153670001	153680000	-0.324846	-0.289813	-0.359444	-0.323151	-0.0799469	-0.287305	-0.308631	-0.400295	-0.161928	-0.0750524	-0.0836112	-0.129435	-0.152389	-0.057322	-0.331683	-0.266617	-0.12229	-0.437393	-0.238574	-0.195194	-0.281416	-0.0114707	-0.127842	-0.0192985	0.0724121	0.139425	FALSE	0.831015	-0.02193	FALSE	0.166411	0.117494	FALSE	FALSE	static	-0.276867	-0.160481	-0.108584	-1.10111	0.249448	0.851663	0.851663
chr1	153790001	153800000	-0.231119	-0.347347	-0.454675	-0.3132	-0.591473	-0.307263	-0.481198	-0.310624	-0.332264	-0.317798	-0.0875463	-0.335067	-0.175241	-0.206251	-0.61461	-0.0589095	-0.417059	-0.616565	-0.163674	-0.123594	-0.1862	-0.267108	-0.233194	-0.231068	0.338423	0.113652	FALSE	0.925269	-0.0138469	FALSE	0.316993	0.0998046	FALSE	FALSE	static	-0.582442	-0.196081	-0.224576	-1.15217	0.642256	0.509914	0.642256
chr1	153990001	154000000	-1.00861	-0.999998	-1.17236	-1.02119	-0.657153	-0.657784	-0.963384	-1.14749	-0.609164	-0.637649	-0.550444	-0.630397	-0.579249	-0.556325	-0.946204	-0.877388	-0.618668	-0.959225	-0.868028	-0.811094	-0.576156	-0.58934	-0.83738	-0.478683	0.0552197	0.280145	FALSE	0.740772	-0.0439692	FALSE	0.071017	0.236175	FALSE	FALSE	static	-0.929707	-0.613958	-0.573397	-1.14844	0.470253	0.67819	0.67819
chr1	154280001	154290000	-0.118954	-0.413576	-0.102914	-0.00973522	-0.349028	-0.317335	-0.251365	-0.108505	-0.0564878	-0.0168065	-0.0058413	-0.107464	0.0373448	0.0713437	0.0396323	0.0620712	-0.596157	-0.0915482	-0.120664	-0.181742	-0.0720705	-0.0139765	-0.22478	0.0791797	0.0387163	0.211901	FALSE	0.178946	-0.155694	FALSE	0.667719	0.0562069	FALSE	FALSE	static	-0.156739	0.0252835	-0.0522149	-1.04566	0.947036	0.0986198	0.947036
chr1	154290001	154300000	-0.00753803	-0.364971	0.0266781	0.112441	-0.343446	-0.185414	-0.179848	-0.0165041	0.0073209	0.0193096	0.05136	-0.058558	0.0968192	0.137315	0.110318	0.0947269	-0.622962	-0.0869216	-0.0718235	-0.21281	-0.0482297	0.0163906	-0.0659682	0.123931	0.116512	0.177152	FALSE	0.164697	-0.178376	FALSE	0.994108	-0.00122378	FALSE	FALSE	static	-0.0536026	0.081375	-0.0230861	-0.779338	1.12755	-0.348217	1.12755
chr1	154480001	154490000	-0.0155877	0.212142	-0.0179981	0.156097	-0.0175313	0.167241	0.166036	0.0844163	0.140857	0.151849	0.309501	0.126307	0.0427729	-0.0607321	0.0638981	0.233806	0.0649503	-0.0431176	-0.0748296	-0.1579	0.0853627	0.109093	-0.141609	0.153272	0.705778	0.0341803	FALSE	0.139881	-0.12663	FALSE	0.221663	-0.0924493	FALSE	FALSE	static	0.0738204	0.162372	0.0202861	-0.162663	1.07136	-0.908697	1.07136
chr1	154560001	154570000	-0.206546	-0.48863	-0.505054	-0.36594	-0.403061	-0.493323	-0.266116	-0.23557	-0.246478	-0.15195	-0.514156	-0.112568	-0.214827	-0.26446	-0.372216	-0.0565892	-0.30385	-0.190428	-0.357202	-0.115228	-0.352799	-0.0887467	-0.546841	-0.120468	0.223784	0.128875	FALSE	0.894096	-0.0177899	FALSE	0.262429	0.111085	FALSE	FALSE	static	-0.349133	-0.216264	-0.217399	-1.15467	0.584764	0.569905	0.584764
chr1	154570001	154580000	-0.139823	-0.347037	-0.314944	-0.334608	-0.280137	-0.316944	-0.115166	-0.166106	-0.123949	-0.0431968	-0.368932	-0.00859028	-0.0900198	-0.235265	-0.340893	0.0423325	-0.187922	-0.210383	-0.230847	-0.103498	-0.253484	0.0248005	-0.382196	-0.0801222	0.293713	0.105781	FALSE	0.785034	-0.0318922	FALSE	0.341863	0.0738892	FALSE	FALSE	static	-0.253558	-0.111896	-0.115062	-1.15448	0.596807	0.557673	0.596807
chr1	154930001	154940000	-0.403773	-0.517956	-0.259489	-0.361743	-0.165696	-0.329863	-0.401932	-0.124932	-0.414702	-0.359577	-0.316738	-0.399032	-0.0974468	-0.569393	-0.253504	-0.322515	-0.2705	-0.279329	-0.302737	-0.336295	0.0649827	0.0704021	-0.15502	0.0230599	0.862252	-0.0209405	FALSE	0.0954223	0.193434	FALSE	0.112322	0.172493	FALSE	FALSE	static	-0.309017	-0.571471	-0.104716	0.0828438	-1.03884	0.956001	0.956001
chr1	155080001	155090000	-0.149896	-0.247036	-0.0250275	0.0526756	-0.0239055	-0.129241	0.048092	-0.00941921	-0.167715	-0.193999	-0.170126	-0.218613	-0.234301	0.0154754	-0.248329	-0.0721358	-0.128183	-0.288701	-0.129559	-0.113935	-0.064296	-0.125283	0.0227052	0.0700152	0.189298	-0.100748	FALSE	0.372203	0.0665632	FALSE	0.667756	-0.034185	FALSE	FALSE	static	-0.0615262	-0.135145	-0.0524134	0.473989	-1.14886	0.674872	0.674872
chr1	155090001	155100000	0.130939	-0.0191014	0.209015	0.294729	0.13157	0.0412905	0.164416	0.170189	0.0445812	0.0514297	0.0395274	0.0509707	-0.0473719	0.177988	-0.0595365	0.169608	0.0712071	-0.00683959	0.157197	0.0862824	0.133743	0.0996291	0.218374	0.223438	0.225315	-0.0869814	FALSE	0.247959	0.0694793	FALSE	0.796062	-0.0175021	FALSE	FALSE	static	0.145871	0.0779519	0.161094	0.396813	-1.1375	0.740691	0.740691
chr1	155160001	155170000	0.0755532	0.13328	0.00384172	0.267767	0.162817	-0.0357621	0.194008	0.105511	0.147343	0.230988	0.245743	0.0584203	0.18749	0.0621469	0.0519612	0.0461192	0.0403172	0.0806863	-0.054731	0.148005	0.0572803	0.151732	0.193615	0.0886117	0.853654	0.0153996	FALSE	0.519506	-0.0405871	FALSE	0.706352	-0.0251875	FALSE	FALSE	static	0.135717	0.161031	0.134023	-0.52046	1.15289	-0.63243	1.15289
chr1	155170001	155180000	-0.190813	-0.179829	-0.27196	0.0429072	-0.0983641	-0.232446	0.00131518	-0.128006	-0.0736329	0.0273075	0.0841155	-0.182461	0.0262587	-0.192762	-0.165132	-0.187634	-0.154028	-0.0934733	-0.280605	-0.0884589	-0.18534	-0.11117	0.000441002	-0.0988337	0.596011	0.0491568	FALSE	0.580148	-0.0434409	FALSE	0.943857	0.00571597	FALSE	FALSE	static	-0.108778	-0.0477277	-0.0872294	-0.889255	1.08253	-0.193275	1.08253
chr1	155330001	155340000	-0.103793	-0.375754	-0.0821016	-0.0680077	-0.106928	-0.184384	-0.195892	-0.205501	-0.208655	-0.181645	-0.104571	-0.173486	0.0309769	-0.0288688	0.0163786	0.209427	-0.317178	-0.461663	-0.224257	-0.258465	-0.238514	0.0672934	-0.104792	-0.0130365	0.251868	0.11024	FALSE	0.226	-0.138771	FALSE	0.792224	-0.0285314	FALSE	FALSE	static	-0.164057	-0.0559042	-0.109782	-1.00122	0.998775	0.00244539	0.998775
chr1	155610001	155620000	0.110518	-0.238158	-0.146901	0.0186456	-0.0445066	-0.193411	0.209201	-0.184193	-0.0156466	-0.0469721	0.282905	-0.313907	0.128605	0.0622224	-0.00404089	-0.141481	-0.178805	-0.397927	-0.399185	-0.205303	0.0466632	-0.0378335	0.222813	-0.0976814	0.717691	0.0525612	FALSE	0.396506	-0.124868	FALSE	0.599276	-0.0723068	FALSE	FALSE	static	-0.039582	-0.00913655	-0.0441524	-0.45312	1.14635	-0.693229	1.14635
chr1	155730001	155740000	0.279988	0.110765	0.136513	0.186667	-0.105933	-0.0502469	0.0855054	-0.0488363	0.366362	0.234744	0.281499	0.170831	0.295771	0.257505	0.144335	0.163483	0.0908053	0.068955	0.0062137	0.190907	0.401309	0.134153	0.302665	0.281495	0.0709207	0.165013	FALSE	0.522427	-0.0547533	FALSE	0.235966	0.11026	FALSE	FALSE	static	0.126929	0.276248	0.240017	-1.12303	0.794105	0.328928	0.794105
chr1	155910001	155920000	0.065835	-0.0657733	0.020983	-0.154864	-0.165921	-0.33844	-0.105003	-0.0175354	0.172349	-0.211161	0.0687443	0.0945607	0.0404285	-0.0495567	-0.0141644	0.130125	-0.248927	-0.0726082	0.0127625	-0.222658	-0.0510838	0.00366761	-0.0101077	0.147784	0.202349	0.124006	FALSE	0.367824	-0.0840621	FALSE	0.676798	0.0399435	FALSE	FALSE	static	-0.063838	0.0664208	0.0262336	-1.10106	0.851774	0.249288	0.851774
chr1	156070001	156080000	-0.227324	-0.276486	-0.222077	-0.330431	-0.19039	-0.149499	-0.209414	-0.188027	-0.206794	-0.223283	-0.235923	-0.363648	-0.104113	-0.156714	-0.150444	-0.431631	-0.419386	-0.344073	-0.317035	-0.552041	-0.137769	-0.0658679	-0.224351	-0.276486	0.908826	-0.00986274	FALSE	0.583674	-0.0580573	FALSE	0.420602	-0.06792	FALSE	FALSE	static	-0.23124	-0.20679	-0.201509	-1.13859	0.402848	0.735745	0.735745
chr1	156080001	156090000	-0.127241	-0.158993	-0.0646546	-0.227227	-0.0507101	-0.0253193	-0.137309	-0.103918	-0.128164	-0.147275	-0.12265	-0.22291	0.0789577	-0.0322922	-0.0221985	-0.338007	-0.322747	-0.291956	-0.22475	-0.462867	-0.0730675	0.0419507	-0.183033	-0.172301	0.959846	-0.00489602	FALSE	0.375854	-0.0942791	FALSE	0.245626	-0.0991751	FALSE	FALSE	static	-0.100039	-0.0896754	-0.117026	0.159863	0.910438	-1.0703	0.910438
chr1	156330001	156340000	-0.381104	-0.168437	-0.252952	-0.265679	-0.13288	-0.28599	-0.176218	-0.190179	0.0211762	-0.18233	0.0240053	-0.189238	-0.058319	-0.0101248	-0.226312	-0.0678213	0.0156962	-0.164431	-0.067181	-0.272029	-0.0976434	-0.163864	-0.16412	0.07726	0.0537375	0.14556	FALSE	0.838346	-0.0184186	FALSE	0.0686189	0.127141	FALSE	FALSE	static	-0.229571	-0.065109	-0.0435928	-1.14823	0.468366	0.67986	0.67986
chr1	156340001	156350000	-0.376433	-0.188245	-0.254583	-0.267754	-0.145429	-0.302373	-0.193996	-0.213986	-0.0724127	-0.141682	0.0182669	-0.191982	-0.124956	-0.133711	-0.280297	-0.0738492	-0.0378545	-0.21717	-0.134083	-0.379842	-0.134731	-0.244511	-0.233516	0.0176422	0.0745844	0.117772	FALSE	0.596955	-0.0454302	FALSE	0.322136	0.0723418	FALSE	FALSE	static	-0.243164	-0.103384	-0.109611	-1.1538	0.616334	0.537469	0.616334
chr1	156610001	156620000	0.0712461	0.3674	0.214127	0.200959	0.0521362	0.2474	0.0297829	0.299038	0.236528	0.357522	0.235647	0.00536849	0.272083	0.307516	0.373551	0.238654	0.0658867	-0.16866	-0.0191341	0.0757073	-0.149932	0.0613909	0.103988	0.209567	0.472103	0.0680974	FALSE	0.015924	-0.231007	FALSE	0.0673778	-0.162909	FALSE	FALSE	static	0.200696	0.29933	-0.038515	0.269726	0.837472	-1.1072	0.837472
chr1	156620001	156630000	0.118853	0.349763	0.253421	0.236852	0.1403	0.290735	0.147536	0.355649	0.275051	0.402094	0.317417	0.119114	0.327557	0.361517	0.403236	0.28234	0.0944465	-0.106511	0.0938123	0.0705299	-0.111415	0.156185	0.160463	0.201526	0.30248	0.0744021	FALSE	0.00654714	-0.241161	TRUE	0.0328437	-0.166759	FALSE	TRUE	down.late	0.248464	0.35214	-0.0402193	0.303311	0.813229	-1.11654	0.813229
chr1	156920001	156930000	0.0589224	-0.0415414	-0.0823057	-0.22097	-0.0730495	0.0419239	-0.0525415	0.0814523	0.0273353	-0.321317	0.0634597	0.158721	0.147978	0.147702	-0.271507	0.15079	-0.0210986	-0.0565817	-0.0485901	-0.109801	0.0689724	-0.0223118	0.21266	-0.0668653	0.716519	0.0489088	FALSE	0.894096	-0.0183471	FALSE	0.68138	0.0305616	FALSE	FALSE	static	0.0249724	0.134811	0.0496355	-0.777955	1.12796	-0.350002	1.12796
chr1	156930001	156940000	-0.0738945	-0.185825	-0.282296	-0.377513	-0.178505	-0.069515	-0.173304	-0.0886057	-0.0782893	-0.409438	-0.0785876	0.0100841	0.0424623	0.0564733	-0.464143	0.0556532	-0.0807254	-0.165488	-0.162246	-0.201065	-0.0230646	-0.1194	0.120649	-0.122424	0.616656	0.0704591	FALSE	0.924087	0.0140026	FALSE	0.249898	0.0844618	FALSE	FALSE	static	-0.119316	0.0217559	-0.0317741	-1.07005	0.910853	0.159196	0.910853
chr1	157150001	157160000	-0.343669	-0.421375	-0.344511	-0.34073	-0.201333	-0.393473	-0.357733	-0.342451	-0.425872	-0.317529	-0.377317	-0.390864	-0.340908	-0.550844	-0.298845	-0.623261	-0.354372	-0.273715	-0.116418	-0.338124	-0.311193	-0.189295	-0.381007	-0.224314	0.326029	-0.0725208	FALSE	0.0664595	0.142125	FALSE	0.206794	0.0696046	FALSE	FALSE	static	-0.388486	-0.303181	-0.258255	-1.08609	0.20347	0.882617	0.882617
chr1	157160001	157170000	-0.66574	-0.731968	-0.611023	-0.646144	-0.416984	-0.656355	-0.592176	-0.676826	-0.728565	-0.593162	-0.691576	-0.659319	-0.5294	-0.864304	-0.497088	-0.798302	-0.655584	-0.607871	-0.385612	-0.615864	-0.61297	-0.429522	-0.628493	-0.515393	0.626608	-0.0455623	FALSE	0.177306	0.113801	FALSE	0.317201	0.0682385	FALSE	FALSE	static	-0.711269	-0.562984	-0.545784	-1.14953	0.480242	0.669288	0.669288
chr1	157170001	157180000	-0.90801	-0.896742	-0.767241	-0.843928	-0.543968	-0.773664	-0.718676	-0.924817	-0.915357	-0.739092	-0.941115	-0.895173	-0.647033	-0.97091	-0.63091	-0.968426	-0.797344	-0.777164	-0.573945	-0.758094	-0.808561	-0.554914	-0.797535	-0.681003	0.722008	-0.0413712	FALSE	0.192059	0.119932	FALSE	0.332682	0.0785608	FALSE	FALSE	static	-0.900704	-0.733841	-0.71557	-1.15006	0.485489	0.664573	0.664573
chr1	157360001	157370000	-0.642749	-0.341889	-0.297631	-0.368047	-0.380628	-0.31239	-0.352813	-0.774922	-0.265546	-0.249354	-0.405231	-0.410017	-0.287542	-0.434531	-0.0690244	-0.372535	-0.124863	-0.163522	-0.0905828	-0.116244	-0.0916503	-0.204418	-0.228433	-0.211947	0.30248	0.122161	FALSE	0.0392312	0.157765	FALSE	0.0142334	0.279926	FALSE	FALSE	static	-0.46367	-0.274631	-0.0991616	-1.01217	0.0248116	0.987363	0.987363
chr1	157500001	157510000	-0.570977	-0.675879	-0.510142	-0.470789	-0.308649	-0.384797	-0.373514	-0.458924	-0.538696	-0.646791	-0.642172	-0.790261	-1.01748	-0.626774	-0.564335	-0.604671	-0.350144	-0.460632	-0.359573	-0.036966	-0.445369	-0.319316	-0.0971222	-0.191254	0.0660139	-0.209689	FALSE	0.00324066	0.396351	TRUE	0.0608293	0.186662	FALSE	TRUE	down.early	-0.424051	-0.610664	-0.244792	0.0133971	-1.00663	0.993234	0.993234
chr1	157510001	157520000	-0.492287	-0.688813	-0.500727	-0.402553	-0.252269	-0.388585	-0.287665	-0.465032	-0.497795	-0.547119	-0.570098	-0.689961	-1.01412	-0.570427	-0.429695	-0.613313	-0.296377	-0.397135	-0.284217	-0.0756034	-0.436687	-0.199038	-0.081005	-0.179649	0.14914	-0.181825	FALSE	0.00537281	0.372852	TRUE	0.0486232	0.191027	FALSE	TRUE	down.early	-0.374761	-0.537749	-0.218583	0.0142239	-1.00704	0.992812	0.992812
chr1	157970001	157980000	-0.852495	-0.718001	-0.841027	-0.955324	-0.762974	-0.960607	-0.809298	-0.654206	-0.869963	-0.816979	-0.790111	-0.917882	-0.698805	-0.900971	-0.895735	-0.889218	-0.690803	-0.533289	-0.744469	-0.531695	-0.45637	-0.633244	-0.529701	-0.574134	0.723253	-0.0282165	FALSE	0.00123337	0.260745	TRUE	0.00480269	0.232528	TRUE	TRUE	up.late	-0.777307	-0.844779	-0.510925	-0.3756	-0.757818	1.13342	1.13342
chr1	158120001	158130000	-0.792458	-0.596428	-0.67544	-0.853242	-0.388701	-0.615243	-0.526837	-0.602195	-0.65474	-0.688709	-0.517299	-0.691557	-0.54194	-0.543375	-0.684439	-0.506808	-0.476517	-0.368863	-0.375274	-0.889546	-0.426944	-0.337324	-0.381088	-0.378913	0.795002	0.0277098	FALSE	0.161973	0.1493	FALSE	0.123436	0.177009	FALSE	FALSE	static	-0.59585	-0.565106	-0.377244	-0.702358	-0.442559	1.14492	1.14492
chr1	158130001	158140000	-0.812021	-0.655482	-0.713384	-0.92482	-0.455944	-0.652166	-0.522761	-0.688664	-0.773326	-0.738816	-0.630649	-0.710168	-0.586746	-0.559839	-0.89771	-0.472383	-0.533708	-0.505146	-0.453876	-0.890879	-0.452087	-0.378727	-0.454611	-0.488613	0.958834	0.00695057	FALSE	0.158359	0.151499	FALSE	0.136515	0.158449	FALSE	FALSE	static	-0.63976	-0.6373	-0.448932	-0.58855	-0.566078	1.15463	1.15463
chr1	158980001	158990000	-0.575126	-0.667483	-0.610915	-0.802895	-0.477451	-0.390859	-0.522515	-0.612846	-0.797079	-0.648644	-0.471142	-0.521591	-0.932984	-0.722239	-0.673309	-0.71289	-0.338102	-0.338894	-0.493604	-0.154193	-0.236373	-0.375672	-0.235409	-0.284257	0.335384	-0.102473	FALSE	0.00154955	0.377922	TRUE	0.0037513	0.275448	TRUE	TRUE	up.late	-0.601758	-0.72413	-0.264433	-0.300957	-0.814958	1.11592	1.11592
chr1	158990001	159000000	-0.651821	-0.705122	-0.699087	-0.885024	-0.500175	-0.461926	-0.501874	-0.714849	-0.87339	-0.659249	-0.581539	-0.547569	-0.728962	-0.702946	-0.737321	-0.654215	-0.287994	-0.354527	-0.500851	-0.110577	-0.210384	-0.401585	-0.203481	-0.262976	0.664399	-0.0456643	FALSE	0.000475072	0.394102	TRUE	0.00227182	0.348438	TRUE	TRUE	up.late	-0.672184	-0.726342	-0.248819	-0.47068	-0.677811	1.14849	1.14849
chr1	159000001	159010000	-0.625256	-0.643666	-0.637491	-0.838976	-0.465071	-0.469111	-0.424032	-0.679129	-0.853342	-0.582134	-0.58674	-0.464802	-0.54465	-0.60444	-0.703968	-0.500982	-0.241042	-0.322566	-0.436692	-0.0754601	-0.150121	-0.359267	-0.159052	-0.198589	0.953709	-0.00729063	FALSE	0.00125397	0.362284	TRUE	0.0016976	0.354993	TRUE	TRUE	up.late	-0.635287	-0.635455	-0.19639	-0.577019	-0.577681	1.1547	1.1547
chr1	159080001	159090000	-0.479741	-0.705104	-0.687344	-0.833348	-0.445437	-0.4118	-0.354701	-0.486913	-0.291534	-0.375961	-0.334937	-0.493749	-0.458365	-0.310423	-0.308496	-0.324723	-0.37665	-0.565654	-0.47972	-0.868919	-0.335942	-0.458895	-0.331067	-0.538009	0.0924422	0.188275	FALSE	0.195746	-0.132083	FALSE	0.659657	0.0561915	FALSE	FALSE	static	-0.522217	-0.345282	-0.427962	-1.02108	0.977498	0.0435793	0.977498
chr1	159090001	159100000	-0.522299	-0.838947	-0.693971	-0.903361	-0.541596	-0.463852	-0.425438	-0.576452	-0.344063	-0.427672	-0.419994	-0.554085	-0.515814	-0.44602	-0.394501	-0.433299	-0.447393	-0.636146	-0.489249	-0.943623	-0.363869	-0.513155	-0.414464	-0.539133	0.111868	0.178809	FALSE	0.330959	-0.101448	FALSE	0.545682	0.0773605	FALSE	FALSE	static	-0.579004	-0.418629	-0.476866	-1.07787	0.897613	0.180255	0.897613
chr1	159100001	159110000	-0.556188	-0.917784	-0.718529	-0.879489	-0.591053	-0.472033	-0.477645	-0.596494	-0.407525	-0.505224	-0.478722	-0.589518	-0.516825	-0.563085	-0.422483	-0.54195	-0.460855	-0.509376	-0.461338	-0.878546	-0.373381	-0.540182	-0.473186	-0.506727	0.168339	0.147985	FALSE	0.821842	-0.0222822	FALSE	0.264614	0.125703	FALSE	FALSE	static	-0.60219	-0.479291	-0.467783	-1.15125	0.498391	0.65286	0.65286
chr1	159110001	159120000	-0.551375	-0.860742	-0.708127	-0.833757	-0.632329	-0.401269	-0.515579	-0.605644	-0.435687	-0.525629	-0.496771	-0.560613	-0.580505	-0.620833	-0.458098	-0.569014	-0.397119	-0.393974	-0.425091	-0.763206	-0.372043	-0.461805	-0.467602	-0.388878	0.265674	0.107709	FALSE	0.344253	0.0721789	FALSE	0.07558	0.179888	FALSE	FALSE	static	-0.5762	-0.499247	-0.42023	-0.995561	-0.00881966	1.00438	1.00438
chr1	159220001	159230000	-0.702454	-0.385754	-0.55374	-0.47637	-0.18222	-0.255124	-0.274992	-0.194231	-0.315246	-0.272046	-0.434444	-0.404539	-0.168547	-0.262689	-0.198818	-0.305079	-0.119494	-0.115989	-0.287569	-0.41289	-0.346296	-0.0761477	-0.12121	-0.322333	0.488074	0.0829346	FALSE	0.412658	0.0699349	FALSE	0.175499	0.15287	FALSE	FALSE	static	-0.370282	-0.247844	-0.171682	-1.06805	0.153954	0.914095	0.914095
chr1	159770001	159780000	-1.12956	-1.21362	-1.05199	-1.1133	-0.595414	-0.75062	-0.819293	-0.711948	-1.02097	-0.907029	-0.73603	-0.861543	-0.823461	-0.87044	-0.723873	-0.662256	-0.395708	-0.281988	-0.376603	-0.322892	-0.390344	-0.440107	-0.404152	-0.541209	0.512178	0.0975177	FALSE	0.000150406	0.431575	TRUE	0.00286785	0.529093	TRUE	TRUE	up.late	-0.919416	-0.819877	-0.431564	-0.759558	-0.373416	1.13297	1.13297
chr1	159780001	159790000	-1.08498	-1.12416	-1.00196	-1.05853	-0.647027	-0.700021	-0.797781	-0.646722	-1.01612	-0.872766	-0.713927	-0.812796	-0.835182	-0.880133	-0.807833	-0.6341	-0.391916	-0.231509	-0.3478	-0.289156	-0.418389	-0.444998	-0.415769	-0.52907	0.666622	0.0610401	FALSE	0.000133663	0.438031	TRUE	0.00189288	0.499071	TRUE	TRUE	up.late	-0.874907	-0.811145	-0.428492	-0.704337	-0.440253	1.14459	1.14459
chr1	159900001	159910000	-0.552509	-0.334174	-0.297847	-0.615739	-0.485972	-0.531633	-0.295265	-0.306195	-0.409666	-0.418522	-0.344733	-0.422972	-0.42761	-0.319299	-0.400231	-0.331727	-0.709947	-0.0366511	-0.147218	-0.235547	-0.269755	-0.107597	-0.241373	-0.289124	0.607549	0.0430717	FALSE	0.255651	0.129694	FALSE	0.153371	0.172765	FALSE	FALSE	static	-0.344342	-0.303362	-0.192896	-0.818818	-0.295682	1.1145	1.1145
chr1	160020001	160030000	-0.0230288	-0.0838547	-0.0240157	-0.141745	-0.216346	-0.240042	-0.113152	-0.07995	-0.120416	0.0284409	-0.025205	-0.0880836	-0.0736512	-0.0666827	-0.242649	-0.136718	-0.272864	-0.271841	-0.323267	-0.116536	-0.190204	-0.249435	-0.116417	-0.0794639	0.722048	0.0246461	FALSE	0.0765844	-0.111883	FALSE	0.142497	-0.0872367	FALSE	FALSE	static	-0.07492	-0.0650849	-0.170476	0.490818	0.659756	-1.15057	0.659756
chr1	160100001	160110000	-0.230245	-0.0943326	-0.200799	-0.247362	-0.0813571	-0.00322813	-0.161914	-0.115333	-0.2859	-0.192407	-0.155377	-0.043401	-0.221272	-0.0772039	-0.195259	-0.502665	-0.248759	-0.297243	-0.111749	-0.0618416	-0.198711	-0.13507	0.0219684	-0.265631	0.472103	-0.0673643	FALSE	0.641462	0.0470562	FALSE	0.787843	-0.0203081	FALSE	FALSE	static	-0.150154	-0.187563	-0.139093	0.345775	-1.127	0.781225	0.781225
chr1	160330001	160340000	-0.172979	-0.213516	-0.116771	-0.275502	-0.180777	-0.104722	-0.0299955	-0.185443	-0.276038	-0.158653	-0.0579091	-0.121316	-0.295194	-0.291343	-0.161236	-0.259729	0.22292	0.10935	0.085177	-0.0542363	0.129532	0.0678033	0.0811849	0.0965659	0.522026	-0.0427142	FALSE	0.000405899	0.294965	TRUE	0.000467377	0.25225	TRUE	TRUE	up.late	-0.132754	-0.201159	0.131155	-0.371368	-0.761187	1.13255	1.13255
chr1	160340001	160350000	-0.19377	-0.270777	-0.186266	-0.283926	-0.199787	-0.131344	-0.105189	-0.258394	-0.354045	-0.301977	-0.200778	-0.288089	-0.446575	-0.407044	-0.280114	-0.411576	0.130743	0.0470451	0.0107857	-0.183652	0.0636307	0.0265943	0.0543634	0.0436037	0.0375545	-0.132593	FALSE	0.000132215	0.360414	TRUE	0.00151233	0.227821	TRUE	TRUE	down.early	-0.181673	-0.325165	0.0746836	-0.185728	-0.894115	1.07984	1.07984
chr1	160350001	160360000	-0.230332	-0.300342	-0.235812	-0.293511	-0.174276	-0.121529	-0.0929476	-0.222739	-0.432978	-0.400458	-0.316248	-0.444056	-0.556413	-0.459813	-0.405235	-0.496165	0.09093	-0.00503989	-0.0483032	-0.173626	0.0137439	0.0187863	0.0677169	-0.0106139	0.00244552	-0.229985	TRUE	1.33445e-05	0.43312	TRUE	0.00215558	0.203135	TRUE	TRUE	down.early	-0.198432	-0.42236	0.034881	-0.0136817	-0.993089	1.00677	1.00677
chr1	160410001	160420000	-0.370885	-0.267812	-0.32767	-0.352241	-0.139943	-0.270714	-0.198165	-0.0975043	-0.241917	-0.286052	-0.153696	-0.294212	-0.131406	-0.368346	-0.212352	-0.212169	0.157815	-0.0969474	-0.0797382	-0.0515001	0.0664424	0.0382807	-0.137746	-0.170546	0.847624	0.0155981	FALSE	0.0107853	0.203276	FALSE	0.00842165	0.218875	TRUE	TRUE	up.late	-0.257376	-0.192007	-0.0288581	-0.832349	-0.276932	1.10928	1.10928
chr1	160640001	160650000	-0.0296148	0.0413477	0.0751901	0.121797	0.091128	-0.182513	0.129632	0.0746704	-0.0536445	-0.365295	-0.0432111	0.0720469	0.0717265	-0.109276	-0.0582666	-0.115775	-0.157238	-0.109668	-0.187815	-0.111159	-0.182747	-0.0614422	-0.1141	-0.022519	0.226402	-0.115417	FALSE	0.608373	-0.0431242	FALSE	0.016778	-0.158541	FALSE	FALSE	static	0.0922158	0.00261076	-0.102802	0.971916	0.0539809	-1.0259	0.971916
chr1	160650001	160660000	0.0117069	0.0445288	0.0655266	0.0513285	0.158722	-0.339075	0.174785	0.0611222	-0.0866944	-0.402531	-0.0641801	0.103878	0.120503	-0.180724	0.00810947	-0.0707925	-0.23565	-0.180154	-0.161705	-0.15743	-0.118419	-0.0686326	-0.10066	-0.00880063	0.440953	-0.100134	FALSE	0.574611	-0.0573775	FALSE	0.0833821	-0.157512	FALSE	FALSE	static	0.0872027	0.00658351	-0.10811	0.937105	0.115722	-1.05283	0.937105
chr1	160980001	160990000	-0.816964	-0.811792	-0.861509	-0.709537	-0.49583	-0.484214	-0.46833	-0.402382	-0.65608	-0.622278	-0.567755	-0.394812	-0.433456	-0.483071	-0.616679	-0.469366	-0.72959	-0.613556	-0.454067	-0.36594	-0.391405	-0.815296	-0.560675	-0.456467	0.397953	0.100883	FALSE	0.877518	-0.0179374	FALSE	0.508499	0.0829452	FALSE	FALSE	static	-0.633458	-0.522147	-0.483317	-1.11829	0.310019	0.808274	0.808274
chr1	160990001	161000000	-0.708611	-0.748512	-0.799307	-0.590024	-0.428807	-0.426817	-0.369856	-0.387414	-0.536614	-0.520133	-0.462395	-0.371899	-0.397086	-0.381376	-0.561153	-0.435003	-0.587859	-0.48788	-0.30808	-0.270958	-0.214244	-0.707179	-0.436225	-0.355483	0.360269	0.0992109	FALSE	0.72651	0.0372192	FALSE	0.254425	0.13643	FALSE	FALSE	static	-0.555903	-0.445512	-0.350996	-1.0248	0.0516005	0.973201	0.973201
chr1	161160001	161170000	-0.48489	-0.391036	-0.250316	-0.230444	-0.400815	-0.293538	-0.463503	-0.344366	-0.218568	-0.276641	-0.376652	-0.438772	-0.388062	-0.609581	-0.664438	-0.296945	-0.120858	-0.449212	0.127495	-0.00464482	-0.141385	-0.266477	-0.178601	-0.243869	0.640526	-0.0513438	FALSE	0.0458712	0.249013	FALSE	0.0558943	0.197669	FALSE	FALSE	static	-0.330556	-0.31668	-0.278093	-0.813457	-0.303001	1.11646	1.11646
chr1	161440001	161450000	0.152794	-1.46644	-0.914614	-1.20497	-1.32661	-1.16588	-1.06848	0.725618	-0.873551	-0.981953	-1.44537	-1.25067	-1.07505	-1.20646	-1.69174	-0.751688	-1.96892	-1.0214	-1.37699	-1.26519	-0.0691887	-1.30628	0.327184	-1.8328	0.440836	-0.375988	FALSE	0.857609	0.0953612	FALSE	0.6318	-0.280627	FALSE	FALSE	static	-1.04236	-1.07395	-1.0164	0.0652092	-1.03101	0.9658	0.9658
chr1	161760001	161770000	-1.08591	-0.950482	-1.01273	-1.06433	-0.817218	-0.92487	-0.980941	-0.942919	-0.864719	-1.15497	-0.871369	-0.827716	-0.905092	-0.772725	-0.790996	-1.22602	-0.740668	-0.578194	-0.705209	-0.887965	-0.939758	-0.738533	-0.648767	-0.772234	0.690253	0.0457226	FALSE	0.106606	0.175286	FALSE	0.00764569	0.221008	TRUE	TRUE	up.late	-0.974321	-0.912046	-0.647526	-0.747429	-0.388527	1.13596	1.13596
chr1	162040001	162050000	-1.07342	-1.18716	-0.777035	-0.893841	-0.760352	-0.734235	-0.71657	-0.802426	-0.935566	-1.04528	-0.835118	-0.948822	-0.803239	-0.944061	-0.625452	-1.02575	-1.23412	-0.884355	-0.542973	-0.777955	-0.965521	-0.770122	-0.620349	-1.01686	0.846991	-0.0272815	FALSE	0.77732	0.0438785	FALSE	0.918407	0.016597	FALSE	FALSE	static	-0.86778	-0.872452	-1.20297	0.589463	0.565152	-1.15462	0.589463
chr1	162050001	162060000	-1.1038	-1.09699	-0.831496	-0.8847	-0.731493	-0.782798	-0.699369	-0.762035	-0.972227	-1.08476	-0.843249	-0.879095	-0.82373	-0.98215	-0.613363	-1.15349	-1.08542	-0.90527	-0.616977	-0.762155	-0.977693	-0.746594	-0.619048	-1.01028	0.679111	-0.0574239	FALSE	0.56522	0.0785794	FALSE	0.875396	0.0211555	FALSE	FALSE	static	-0.863014	-0.886722	-1.13364	0.654633	0.49645	-1.15108	0.654633
chr1	162350001	162360000	0.272813	0.028182	0.0526171	0.228597	0.163431	0.142965	0.12415	0.198216	0.236369	0.202959	0.0610003	0.244603	0.201275	0.203562	-0.00435973	0.283653	0.0591921	0.0806952	0.139902	0.055947	-0.0583745	-0.0595604	-0.0882955	0.087924	0.729553	0.0272611	FALSE	0.0307739	-0.151454	FALSE	0.0396273	-0.124193	FALSE	FALSE	static	0.164873	0.203857	0.0683697	0.274889	0.833806	-1.10869	0.833806
chr1	162510001	162520000	-0.283653	-0.106622	-0.26742	-0.140275	0.0167243	-0.111511	-0.219241	-0.236825	-0.0312243	0.04929	-0.142268	0.0163926	-0.0377488	-0.0878871	-0.141695	-0.21617	-0.0682826	-0.154001	0.0369152	-0.163507	-0.0972553	0.0078546	0.0215381	0.0661385	0.206933	0.094689	FALSE	0.674067	0.0300889	FALSE	0.065716	0.124778	FALSE	FALSE	static	-0.130956	-0.00245182	-0.0120226	-1.15212	0.642905	0.509213	0.642905
chr1	162600001	162610000	-0.796025	-0.78408	-0.528486	-0.646333	-0.777778	-0.607933	-0.761171	-0.614972	-0.799067	-0.371097	-0.490654	-0.390198	-0.612069	-0.536737	-0.685067	-0.462147	-0.195855	-0.10618	-0.35317	-0.280812	-0.183107	-0.483091	-0.170389	-0.293901	0.149501	0.146218	FALSE	0.00948429	0.285067	TRUE	0.000180085	0.431284	TRUE	TRUE	up.late	-0.594657	-0.49031	-0.217585	-0.824204	-0.288267	1.11247	1.11247
chr1	162610001	162620000	-0.762931	-0.71291	-0.483795	-0.634763	-0.778214	-0.597881	-0.767097	-0.546557	-0.813937	-0.417694	-0.531465	-0.415863	-0.623483	-0.474752	-0.596774	-0.440142	-0.190408	-0.0960512	-0.376636	-0.35027	-0.159594	-0.565865	-0.172564	-0.315034	0.214004	0.121255	FALSE	0.0209519	0.260961	FALSE	0.00158097	0.382216	TRUE	TRUE	up.late	-0.576558	-0.508364	-0.224338	-0.750176	-0.385127	1.1353	1.1353
chr1	162780001	162790000	-0.391594	-0.614224	-0.427289	-0.515448	-0.544904	-0.614705	-0.579979	-0.498019	-0.321167	-0.261807	-0.164704	-0.306331	-0.210358	-0.386912	-0.341481	-0.545667	-0.479161	-0.324497	-0.485756	-0.606887	-0.246728	-0.39604	-0.42656	-0.405998	0.0228495	0.205967	FALSE	0.205958	-0.10415	FALSE	0.132113	0.101817	FALSE	FALSE	static	-0.485115	-0.267988	-0.356199	-1.05632	0.932067	0.124252	0.932067
chr1	162800001	162810000	-0.735797	-0.722736	-0.789193	-1.03546	-1.09694	-0.874199	-0.687812	-0.714453	-0.61509	-0.764689	-0.612348	-0.649496	-0.620937	-0.577575	-0.608756	-0.729815	-0.782593	-0.549094	-0.818402	-1.06	-0.642661	-0.794899	-0.79068	-0.806396	0.075874	0.184736	FALSE	0.129285	-0.133252	FALSE	0.646278	0.0514834	FALSE	FALSE	static	-0.815211	-0.618975	-0.720707	-0.987499	1.01205	-0.0245495	1.01205
chr1	162810001	162820000	-0.822077	-0.701534	-0.882771	-1.25854	-1.19318	-0.983141	-0.80512	-0.786349	-0.736921	-1.02852	-0.736171	-0.820456	-0.81715	-0.746974	-0.784076	-0.859342	-0.835179	-0.585331	-0.868509	-1.04297	-0.78705	-0.966317	-1.00993	-0.920202	0.370487	0.112888	FALSE	0.530407	-0.0607352	FALSE	0.691699	0.0521525	FALSE	FALSE	static	-0.92024	-0.783408	-0.82653	-1.09849	0.857451	0.241038	0.857451
chr1	162850001	162860000	-0.639024	-0.49602	-0.741272	-0.927714	-0.493409	-0.833138	-0.657838	-0.584392	-0.792079	-0.872211	-0.788012	-0.784964	-0.61719	-0.730194	-0.680641	-0.62968	-0.551609	-0.727516	-0.512513	-0.630664	-0.525356	-0.80542	-1.05544	-0.722389	0.52583	-0.0652706	FALSE	0.696055	0.045508	FALSE	0.883804	-0.0197626	FALSE	FALSE	static	-0.694841	-0.71525	-0.661521	-0.158681	-0.911172	1.06985	1.06985
chr1	163180001	163190000	-0.0710129	-0.0792917	-0.128405	-0.0829805	-0.221132	-0.204492	-0.0305133	-0.142043	-0.37793	-0.111182	-0.18892	-0.132983	-0.0581371	-0.148127	-0.0286236	-0.240514	-0.409156	0.030361	0.0351721	-0.0551229	-0.0468496	-0.0104284	-0.0133707	-0.1715	0.590106	-0.0408181	FALSE	0.413723	0.0806902	FALSE	0.641016	0.039872	FALSE	FALSE	static	-0.0730817	-0.115163	-0.0352182	0.0351546	-1.01711	0.981959	0.981959
chr1	163320001	163330000	-1.04558	-0.98615	-1.00378	-0.994341	-0.915505	-0.994086	-1.04508	-0.987757	-0.737032	-0.839775	-0.86467	-0.832928	-0.805112	-0.87878	-1.00993	-1.03843	-0.554362	-0.627368	-0.766688	-0.876565	-0.813427	-0.729135	-0.613244	-0.725874	0.0737125	0.120704	FALSE	0.0405918	0.162499	FALSE	0.00151233	0.283202	TRUE	TRUE	up.late	-0.960754	-0.82189	-0.666896	-0.981211	-0.0365739	1.01779	1.01779
chr1	163340001	163350000	-1.14408	-1.05739	-0.977833	-1.08605	-1.03013	-0.911099	-1.07198	-0.941395	-0.807648	-0.913127	-0.81611	-0.968179	-0.851621	-0.938516	-1.12943	-1.01909	-0.642792	-0.769449	-0.877231	-0.827315	-0.913939	-0.810457	-0.561046	-0.805158	0.197015	0.0970288	FALSE	0.0675985	0.154541	FALSE	0.00361738	0.25157	TRUE	TRUE	up.late	-1.00773	-0.885282	-0.718354	-0.945044	-0.102081	1.04713	1.04713
chr1	163530001	163540000	-0.384417	-0.465598	-0.388016	-0.419633	-0.207	-0.222115	-0.141111	-0.144712	-0.386352	-0.367383	-0.387458	-0.36522	-0.260401	-0.274609	-0.324397	-0.425616	-0.428697	-0.145333	-0.265018	-0.292749	-0.304393	-0.265052	-0.159918	-0.323631	0.529642	-0.0523543	FALSE	0.177912	0.0758304	FALSE	0.787679	0.0234761	FALSE	FALSE	static	-0.308273	-0.337827	-0.266308	-0.11512	-0.937458	1.05258	1.05258
chr1	164560001	164570000	-0.158342	-0.0617983	-0.170407	-0.164934	0.0682643	0.0131888	-0.0336968	-0.106019	-0.448476	-0.146201	-0.0772078	-0.10046	-0.0220464	-0.0362361	0.0115318	-0.245981	0.00372762	0.182828	-0.0625267	-0.14191	0.00585733	-0.225191	-0.189456	-0.00800662	0.580991	-0.0564165	FALSE	0.464796	0.0787998	FALSE	0.796682	0.0223833	FALSE	FALSE	static	-0.0843041	-0.0685606	-0.0117479	-0.771187	-0.358687	1.12987	1.12987
chr1	164780001	164790000	-0.732027	-0.69724	-1.1255	-0.80764	-0.56728	-0.57959	-0.575619	-0.67036	-0.621378	-0.928425	-0.769869	-0.696731	-0.702121	-0.850038	-0.578697	-0.733031	-0.50146	-0.366858	-0.536099	-0.6691	-0.584458	-0.805976	-0.442711	-0.624929	0.915505	-0.0156287	FALSE	0.0729575	0.168587	FALSE	0.178966	0.152958	FALSE	FALSE	static	-0.701998	-0.683376	-0.561471	-0.695029	-0.451047	1.14608	1.14608
chr1	164790001	164800000	-0.795685	-0.737709	-1.12207	-0.887501	-0.588758	-0.665028	-0.624876	-0.82241	-0.720184	-1.04482	-0.943237	-0.820394	-0.789794	-1.05134	-0.772961	-0.855608	-0.557243	-0.459533	-0.569319	-0.749373	-0.606906	-0.859808	-0.544081	-0.691785	0.431732	-0.0942868	FALSE	0.014662	0.245035	FALSE	0.155904	0.150748	FALSE	FALSE	static	-0.773594	-0.811822	-0.624684	-0.373144	-0.759775	1.13292	1.13292
chr1	165100001	165110000	-0.854515	-0.706618	-0.736451	-0.682319	-0.64713	-0.518376	-0.622265	-0.620426	-1.05892	-0.723029	-0.858389	-0.661189	-0.63332	-0.718285	-0.790578	-0.634655	-0.729854	-0.580551	-0.735201	-0.761263	-0.830074	-0.657767	-0.7418	-0.792108	0.37525	-0.0862828	FALSE	0.743699	0.031218	FALSE	0.380695	-0.0550649	FALSE	FALSE	static	-0.676506	-0.708588	-0.731718	1.04946	-0.107622	-0.941836	1.04946
chr1	165110001	165120000	-0.687751	-0.589179	-0.591256	-0.526329	-0.56403	-0.402063	-0.524046	-0.483951	-1.02148	-0.582054	-0.696027	-0.533024	-0.519689	-0.59813	-0.734833	-0.48885	-0.729471	-0.504214	-0.649022	-0.801303	-0.769484	-0.516962	-0.686586	-0.741379	0.356012	-0.100686	FALSE	0.820767	-0.0280413	FALSE	0.0682452	-0.128727	FALSE	FALSE	static	-0.543227	-0.582152	-0.669679	0.851176	0.250152	-1.10133	0.851176
chr1	165370001	165380000	-0.581936	-0.723597	-0.550729	-0.583994	-0.452854	-0.450118	-0.51418	-0.476136	-0.50374	-0.542904	-0.639403	-0.542677	-0.509624	-0.418814	-0.407107	-0.369959	-0.668249	-0.575643	-0.306959	-0.511134	-0.417154	-0.276447	-0.630325	-0.490092	0.487954	0.0499144	FALSE	0.945805	0.00727801	FALSE	0.508128	0.0571924	FALSE	FALSE	static	-0.535778	-0.419908	-0.478856	-0.994125	1.00577	-0.0116477	1.00577
chr1	165380001	165390000	-0.659506	-0.733845	-0.616889	-0.561203	-0.5445	-0.40433	-0.51716	-0.56574	-0.500233	-0.566603	-0.599623	-0.516019	-0.507876	-0.433903	-0.503596	-0.396742	-0.709706	-0.687084	-0.341501	-0.606979	-0.49528	-0.323576	-0.706554	-0.535386	0.270788	0.0723221	FALSE	0.617658	-0.0476839	FALSE	0.808358	0.0246382	FALSE	FALSE	static	-0.567699	-0.438262	-0.542681	-0.749879	1.13537	-0.385495	1.13537
chr1	165600001	165610000	-0.834919	-0.855538	-0.753805	-0.776337	-0.540441	-0.626117	-0.578701	-0.717749	-0.638864	-0.679815	-0.639869	-0.741671	-0.765305	-0.778628	-0.605913	-0.787405	-0.590092	-0.606254	-0.435032	-0.585789	-1.05993	-0.756145	-0.682764	-0.588652	0.951245	0.00576709	FALSE	0.718502	0.0416017	FALSE	0.682467	0.0473688	FALSE	FALSE	static	-0.706914	-0.659298	-0.590606	-0.934498	-0.120147	1.05465	1.05465
chr1	165610001	165620000	-0.716776	-0.606159	-0.543001	-0.628462	-0.426868	-0.487233	-0.44698	-0.576022	-0.464862	-0.46714	-0.496764	-0.607784	-0.590303	-0.58535	-0.443819	-0.687187	-0.414081	-0.420279	-0.314445	-0.441137	-0.909732	-0.62721	-0.578452	-0.488582	0.901725	0.0110367	FALSE	0.882315	0.0186614	FALSE	0.79582	0.029698	FALSE	FALSE	static	-0.549522	-0.492662	-0.45179	-1.04986	0.108573	0.941283	0.941283
chr1	165710001	165720000	-0.176118	-0.195412	-0.106927	-0.270804	-0.101015	-0.530217	-0.323381	-0.414092	-0.184073	-0.20923	-0.0613666	-0.0889748	-0.267387	-0.0731545	-0.154269	-0.226193	-0.0319581	-0.0504043	-0.0699546	-0.245647	-0.0250176	-0.107268	-0.0486028	-0.100534	0.265862	0.106665	FALSE	0.176883	0.0731578	FALSE	0.0459491	0.179822	FALSE	FALSE	static	-0.342826	-0.109179	-0.0451155	-1.13032	0.360743	0.769575	0.769575
chr1	165910001	165920000	-1.30693	-1.46642	-1.56758	-1.32744	-1.27512	-1.14772	-1.18664	-0.98587	-1.159	-1.15057	-1.31272	-1.27584	-1.36527	-1.22022	-1.16844	-1.27823	-0.82433	-1.05373	-0.779939	-0.915541	-1.01869	-1.04565	-1.30047	-1.12176	0.734818	0.041678	FALSE	0.0301477	0.233773	FALSE	0.0309726	0.275451	FALSE	FALSE	static	-1.21698	-1.18935	-0.970198	-0.676491	-0.472168	1.14866	1.14866
chr1	165920001	165930000	-1.39811	-1.53695	-1.4823	-1.32618	-1.42209	-1.12856	-1.20326	-1.11218	-1.20089	-1.23229	-1.3813	-1.30842	-1.43852	-1.2499	-1.23232	-1.26097	-0.85518	-1.02442	-0.730833	-0.894972	-1.05088	-1.05982	-1.27212	-1.13863	0.733574	0.0381278	FALSE	0.0141419	0.284721	FALSE	0.0115233	0.322849	FALSE	FALSE	static	-1.26026	-1.22848	-0.979372	-0.677568	-0.470955	1.14852	1.14852
chr1	165930001	165940000	-1.30946	-1.42089	-1.23358	-1.14802	-1.29867	-0.952036	-1.02591	-1.13222	-1.0509	-1.13228	-1.20681	-1.15615	-1.34354	-1.16387	-1.08021	-1.09024	-0.809074	-0.85151	-0.589016	-0.790117	-0.972102	-0.959601	-1.19161	-1.00776	0.740197	0.0371003	FALSE	0.0274466	0.256651	FALSE	0.0194802	0.293751	FALSE	FALSE	static	-1.13449	-1.09257	-0.865468	-0.71608	-0.426449	1.14253	1.14253
chr1	166440001	166450000	-0.216964	-0.0442735	-0.0497109	-0.452623	0.0700755	0.181904	-0.00686598	-0.0526041	-0.113881	-0.315309	-0.139434	-0.112949	-0.141434	-0.0710131	-0.0161881	-0.214374	-0.202996	-0.147407	-0.286725	-0.115618	-0.256202	-0.208136	-0.0535081	-0.212525	0.578036	-0.0691899	FALSE	0.485712	-0.044817	FALSE	0.276024	-0.114007	FALSE	FALSE	static	-0.0579115	-0.131461	-0.173392	1.07788	-0.180286	-0.897593	1.07788
chr1	166480001	166490000	-0.3391	-0.30134	-0.223715	-0.342604	-0.310532	-0.0431125	-0.172724	-0.139343	-0.400622	-0.241749	-0.2326	-0.155512	-0.163599	-0.103757	-0.267351	-0.183801	-0.266601	-0.225227	-0.261944	-0.111584	-0.362689	-0.295525	-0.158603	-0.173979	0.865232	0.0154351	FALSE	0.857345	-0.0133954	FALSE	0.980699	0.00203971	FALSE	FALSE	static	-0.209667	-0.214768	-0.226422	0.848279	0.254328	-1.10261	0.848279
chr1	166490001	166500000	-0.333793	-0.287547	-0.207476	-0.264068	-0.334324	-0.0512448	-0.0929328	-0.0838716	-0.369644	-0.135668	-0.206827	-0.115701	-0.127149	-0.12667	-0.215549	-0.165054	-0.259554	-0.229003	-0.244275	-0.123204	-0.313625	-0.213953	-0.151869	-0.0975818	0.790057	0.0241244	FALSE	0.742741	-0.0213502	FALSE	0.973518	0.00277414	FALSE	FALSE	static	-0.189893	-0.173204	-0.196932	-0.263989	1.10551	-0.841521	1.10551
chr1	166500001	166510000	-0.286386	-0.231071	-0.171378	-0.20153	-0.322926	-0.0112655	-0.0989801	-0.0368382	-0.322362	-0.0944636	-0.206622	-0.0966729	-0.07995	-0.137892	-0.118101	-0.129151	-0.240864	-0.158292	-0.252127	-0.133832	-0.239371	-0.158233	-0.122752	-0.0377661	0.804804	0.021895	FALSE	0.755411	-0.0197529	FALSE	0.97948	0.002142	FALSE	FALSE	static	-0.151066	-0.140752	-0.158283	-0.117173	1.05342	-0.936252	1.05342
chr1	166830001	166840000	-0.57984	-0.597152	-0.546578	-0.647363	-0.504739	-0.547299	-0.405643	-0.418516	-0.627024	-0.571658	-0.578016	-0.617638	-0.521596	-0.491408	-0.618144	-0.576939	-0.395603	-0.320293	-0.026703	-0.442349	-0.78985	-0.422858	-0.352907	-0.461158	0.41993	-0.0444116	FALSE	0.147738	0.173838	FALSE	0.258628	0.129426	FALSE	FALSE	static	-0.528865	-0.573331	-0.373605	-0.352195	-0.776252	1.12845	1.12845
chr1	166840001	166850000	-0.60745	-0.629635	-0.545439	-0.599524	-0.530642	-0.520007	-0.41334	-0.36595	-0.62436	-0.489828	-0.505212	-0.542494	-0.54538	-0.451736	-0.595498	-0.558637	-0.344814	-0.29101	-0.0367389	-0.386849	-0.777541	-0.448852	-0.393739	-0.461393	0.857352	-0.0126449	FALSE	0.207851	0.146526	FALSE	0.241312	0.133881	FALSE	FALSE	static	-0.530134	-0.529177	-0.380807	-0.58291	-0.571773	1.15468	1.15468
chr1	167050001	167060000	-0.654325	-0.677521	-0.783517	-0.684133	-0.660582	-0.652111	-0.5482	-0.490614	-0.762359	-0.669727	-0.831217	-0.799991	-0.724041	-0.698668	-0.740866	-0.917565	-0.600387	-0.685859	-0.746909	-0.669182	-0.841907	-1.2103	-0.664052	-0.820851	0.0706944	-0.124179	FALSE	0.926979	-0.0118768	FALSE	0.204292	-0.136056	FALSE	FALSE	static	-0.636043	-0.742289	-0.751153	1.15193	-0.506773	-0.64516	1.15193
chr1	167060001	167070000	-0.61804	-0.62977	-0.693491	-0.631935	-0.647301	-0.594962	-0.487609	-0.449908	-0.69634	-0.650487	-0.736175	-0.75813	-0.543972	-0.614207	-0.627078	-0.83929	-0.473658	-0.640241	-0.653	-0.612242	-0.823145	-1.08257	-0.58622	-0.746403	0.198441	-0.0890829	FALSE	0.882569	-0.0189752	FALSE	0.293472	-0.108058	FALSE	FALSE	static	-0.577415	-0.660927	-0.674602	1.14491	-0.442487	-0.70242	1.14491
chr1	167230001	167240000	-0.62573	-0.562923	-0.624707	-0.672559	-0.703763	-0.667611	-0.650498	-0.594221	-0.403146	-0.546961	-0.724703	-0.508874	-0.458339	-0.578575	-0.526946	-0.581074	-0.252362	-0.395764	-0.41598	-0.122012	-0.280163	-0.316758	-0.339981	-0.363717	0.119482	0.0966742	FALSE	0.00416509	0.230235	TRUE	0.000264092	0.326909	TRUE	TRUE	up.late	-0.591814	-0.616502	-0.287298	-0.508718	-0.643363	1.15208	1.15208
chr1	167540001	167550000	-0.894695	-0.821754	-0.769465	-0.683669	-0.518721	-0.608173	-0.587696	-0.565773	-0.379287	-0.55744	-0.553185	-0.640023	-0.43875	-0.539056	-0.438423	-0.546173	-0.464818	-0.536703	-0.485579	-0.716019	-0.841415	-0.529875	-0.719978	-0.638967	0.0709207	0.169701	FALSE	0.205251	-0.105127	FALSE	0.501947	0.064574	FALSE	FALSE	static	-0.726581	-0.464889	-0.602728	-0.981718	1.01733	-0.0356132	1.01733
chr1	167700001	167710000	-0.759422	-1.13339	-0.861902	-0.886794	-0.625812	-0.632526	-0.514699	-0.78545	-0.684747	-0.597775	-0.603637	-0.722634	-0.875077	-0.658653	-0.767835	-0.704944	-0.594174	-0.465183	-0.558049	-0.495825	-0.668012	-0.517804	-0.606396	-0.579687	0.556238	0.073087	FALSE	0.0234727	0.141271	FALSE	0.0546942	0.214358	FALSE	FALSE	static	-0.732805	-0.91639	-0.546355	-0.00516049	-0.99741	1.00257	1.00257
chr1	168080001	168090000	-0.349036	-0.343187	-0.319725	-0.306197	-0.714167	-0.42652	-0.27668	-0.819304	-0.172223	-0.418681	-0.341362	-0.515951	-0.183378	-0.147401	-0.277193	-0.634442	-0.13071	-0.182145	-0.100839	-0.313094	-0.401397	-0.378686	-0.328113	-0.231982	0.481346	0.108023	FALSE	0.4978	0.0779585	FALSE	0.117832	0.185981	FALSE	FALSE	static	-0.344607	-0.263538	-0.223311	-1.0918	0.220346	0.871451	0.871451
chr1	168090001	168100000	-0.224589	-0.224086	-0.194289	-0.190849	-0.526461	-0.252554	-0.215679	-0.648379	-0.121188	-0.369131	-0.339094	-0.370736	-0.149235	-0.0601173	-0.156864	-0.562471	-0.0687835	-0.0961897	-0.00994989	-0.306816	-0.358188	-0.329094	-0.267246	-0.194366	0.775326	0.0435061	FALSE	0.604964	0.0622755	FALSE	0.332391	0.105782	FALSE	FALSE	static	-0.224757	-0.204576	-0.181592	-0.977658	-0.0432791	1.02094	1.02094
chr1	168330001	168340000	-0.29763	-0.406699	-0.439727	-0.287899	-0.440511	-0.383797	-0.398034	-0.292392	-0.263434	-0.309294	-0.160183	-0.231886	-0.342628	-0.138506	-0.237529	-0.0953783	-0.298187	-0.0314041	-0.263115	-0.35352	-0.195448	-0.1834	-0.335182	-0.212599	0.0283301	0.145981	FALSE	0.887244	-0.0117519	FALSE	0.0373546	0.13423	FALSE	FALSE	static	-0.342402	-0.198926	-0.212503	-1.15045	0.660931	0.48952	0.660931
chr1	168340001	168350000	-0.343713	-0.404855	-0.473971	-0.266976	-0.381769	-0.415644	-0.392013	-0.251462	-0.244725	-0.279393	-0.163345	-0.269676	-0.411813	-0.157805	-0.252144	-0.115389	-0.17912	-0.0445616	-0.268606	-0.251299	-0.146135	-0.176328	-0.300077	-0.217818	0.0630257	0.129514	FALSE	0.569599	0.0387934	FALSE	0.00665153	0.168307	TRUE	TRUE	up.early	-0.343689	-0.207976	-0.177977	-1.13792	0.399087	0.738831	0.738831
chr1	168580001	168590000	-0.845486	-0.66215	-0.85708	-0.73039	-0.607365	-0.632895	-0.552642	-0.673716	-0.82488	-1.21327	-0.552866	-0.909576	-0.617679	-0.514423	-0.468839	-0.559473	-0.784108	-0.524605	-0.536099	-0.464544	-0.929178	-0.598366	-0.738319	-0.555642	0.948396	-0.0124096	FALSE	0.701174	0.0662676	FALSE	0.588975	0.0538581	FALSE	FALSE	static	-0.637001	-0.939478	-0.651163	0.618338	-1.15371	0.535368	0.618338
chr1	168590001	168600000	-0.921974	-0.722162	-0.998218	-0.796243	-0.649418	-0.605471	-0.505329	-0.71261	-0.875937	-1.17651	-0.66911	-1.00607	-0.74183	-0.626606	-0.604012	-0.611214	-0.835194	-0.5358	-0.525943	-0.512785	-1.10447	-0.63912	-0.722424	-0.620905	0.762573	-0.0499831	FALSE	0.524735	0.101831	FALSE	0.705385	0.0518484	FALSE	FALSE	static	-0.693208	-0.990846	-0.709706	0.625961	-1.1533	0.527335	0.625961
chr1	168610001	168620000	-0.773325	-0.613726	-0.955989	-0.742741	-0.484405	-0.448536	-0.384585	-0.56868	-0.684341	-0.984971	-0.65019	-1.08346	-0.695607	-0.621851	-0.602639	-0.389042	-0.605343	-0.438689	-0.327856	-0.416278	-0.976991	-0.515628	-0.486717	-0.503625	0.58633	-0.0925144	FALSE	0.239955	0.180122	FALSE	0.529415	0.0876072	FALSE	FALSE	static	-0.597769	-0.979265	-0.560465	0.495003	-1.15096	0.655953	0.655953
chr1	169110001	169120000	-0.337193	-0.284927	-0.370996	-0.34399	-0.321896	-0.242428	-0.349275	-0.318487	-0.436064	-0.451296	-0.548014	-0.38978	-0.191759	-0.355327	-0.181868	-0.259645	-0.249338	-0.249035	-0.223345	-0.453059	-0.281484	-0.385327	-0.54016	-0.344874	0.717763	-0.0305701	FALSE	0.919364	0.0108913	FALSE	0.764316	-0.0196788	FALSE	FALSE	static	-0.310442	-0.33827	-0.331425	1.12208	-0.797056	-0.325023	1.12208
chr1	169120001	169130000	-0.301022	-0.252441	-0.330812	-0.298115	-0.296468	-0.231452	-0.331677	-0.324296	-0.370346	-0.438877	-0.465337	-0.297839	-0.195832	-0.324267	-0.224208	-0.255585	-0.196675	-0.204897	-0.215249	-0.37546	-0.243991	-0.306187	-0.527676	-0.361613	0.685481	-0.0257511	FALSE	0.846941	0.0175682	FALSE	0.906563	-0.00818298	FALSE	FALSE	static	-0.278663	-0.302539	-0.298756	1.14208	-0.718463	-0.423622	1.14208
chr1	169340001	169350000	-0.69616	-0.900889	-0.699818	-0.619074	-0.479016	-0.735693	-0.620861	-0.799864	-0.777223	-0.565579	-0.623087	-0.683254	-0.610206	-0.517238	-0.817964	-0.793849	-0.651913	-0.7558	-0.698702	-0.245652	-0.759575	-0.907428	-0.596857	-0.766294	0.851205	0.020372	FALSE	0.996323	0.000772266	FALSE	0.872249	0.0211442	FALSE	FALSE	static	-0.621676	-0.61928	-0.659493	0.523432	0.629639	-1.15307	0.629639
chr1	169350001	169360000	-0.886955	-1.06861	-0.827641	-0.796501	-0.697588	-0.96786	-0.844901	-0.940851	-0.894288	-0.694673	-0.822259	-0.808143	-0.694643	-0.691358	-0.978874	-0.905183	-0.791282	-0.911791	-0.848503	-0.382632	-0.893293	-1.12865	-0.743707	-0.871632	0.449406	0.0676852	FALSE	0.945968	-0.0102581	FALSE	0.648647	0.057427	FALSE	FALSE	static	-0.79099	-0.762934	-0.808629	-0.150686	1.06679	-0.916106	1.06679
chr1	169360001	169370000	-1.00081	-1.14577	-0.915597	-0.938148	-0.806762	-1.18621	-0.916976	-0.99001	-0.925211	-0.764735	-0.895101	-0.902645	-0.719527	-0.732259	-1.02134	-0.923992	-0.841887	-0.978191	-0.996967	-0.499711	-0.914775	-1.28134	-0.788953	-0.898812	0.16894	0.126934	FALSE	0.787029	-0.0394779	FALSE	0.497603	0.0874557	FALSE	FALSE	static	-0.8958	-0.827065	-0.880319	-0.778574	1.12778	-0.349203	1.12778
chr1	169370001	169380000	-1.00258	-1.09074	-0.903618	-0.984296	-0.870769	-1.16555	-0.883983	-0.897971	-0.914335	-0.768522	-0.895563	-0.91011	-0.669939	-0.785471	-0.945178	-0.868509	-0.844213	-0.961927	-1.09961	-0.514848	-0.917124	-1.15932	-0.781546	-0.861826	0.106822	0.130234	FALSE	0.70656	-0.0478483	FALSE	0.475337	0.0823855	FALSE	FALSE	static	-0.903122	-0.815596	-0.864894	-0.955301	1.03939	-0.0840884	1.03939
chr1	169540001	169550000	-0.163565	-0.274151	-0.186299	-0.404821	-0.178425	-0.204686	-0.227093	-0.228846	-0.180985	-0.438901	-0.0994257	-0.135645	-0.267207	-0.19786	-0.274986	-0.10802	-0.225162	-0.354735	-0.252222	-0.30765	-0.226443	-0.304209	-0.345119	-0.327047	0.813723	0.0206068	FALSE	0.226828	-0.0799446	FALSE	0.199714	-0.0593378	FALSE	FALSE	static	-0.196882	-0.276587	-0.254412	1.11197	-0.8255	-0.286473	1.11197
chr1	169550001	169560000	-0.268945	-0.351541	-0.273611	-0.538735	-0.244661	-0.273402	-0.2619	-0.251362	-0.32752	-0.576444	-0.21952	-0.195558	-0.394206	-0.283973	-0.439746	-0.240659	-0.347881	-0.450661	-0.387392	-0.401349	-0.411036	-0.429396	-0.445015	-0.479436	0.795452	-0.0266836	FALSE	0.251864	-0.0843175	FALSE	0.0543676	-0.111001	FALSE	FALSE	static	-0.280386	-0.407524	-0.383694	1.13661	-0.74461	-0.392003	1.13661
chr1	169810001	169820000	-0.271394	-0.407279	-0.347107	-0.31071	-0.364531	-0.375407	-0.374466	-0.262522	-0.412619	-0.151796	-0.251527	-0.251633	-0.276817	-0.488783	-0.332989	-0.431039	-0.187036	-0.214972	-0.385173	-0.309089	-0.346551	-0.229707	-0.591526	-0.40789	0.85653	0.0145265	FALSE	0.930653	-0.00934251	FALSE	0.951091	0.00518401	FALSE	FALSE	static	-0.279439	-0.255109	-0.333697	0.247959	0.852692	-1.10065	0.852692
chr1	169820001	169830000	-0.259879	-0.388826	-0.380804	-0.302988	-0.348569	-0.352024	-0.430739	-0.269938	-0.28365	-0.121189	-0.167113	-0.198366	-0.282513	-0.413535	-0.36853	-0.383343	-0.220191	-0.204158	-0.371833	-0.35462	-0.308761	-0.278184	-0.671246	-0.418737	0.351211	0.0644411	FALSE	0.438067	-0.0761865	FALSE	0.898286	-0.0117454	FALSE	FALSE	static	-0.27611	-0.203774	-0.358608	0.0437278	0.977419	-1.02115	0.977419
chr1	169900001	169910000	-0.848055	-0.649205	-1.06183	-0.716883	-0.670788	-0.638867	-0.717169	-0.823388	-0.636645	-0.685482	-0.712071	-0.751911	-0.836781	-0.747613	-0.740362	-0.81917	-0.21909	-0.290919	-0.551613	-0.353266	-0.548482	-0.548443	-0.614947	-0.678168	0.807581	0.0245179	FALSE	0.0167916	0.265638	FALSE	0.0136317	0.290156	FALSE	FALSE	static	-0.722261	-0.700793	-0.476631	-0.654453	-0.496648	1.1511	1.1511
chr1	170550001	170560000	-0.102673	-0.163592	-0.228213	-0.121078	-0.0442824	-0.0276444	0.0362161	-0.0326825	-0.169187	-0.12083	-0.165616	-0.135412	-0.166792	-0.00488121	0.0792363	-0.12476	0.0657744	0.248032	-0.0255887	0.032493	-0.0453505	-0.022659	0.00206392	-0.00863048	0.844441	-0.0155368	FALSE	0.0561271	0.131797	FALSE	0.0680172	0.116261	FALSE	FALSE	static	-0.0632016	-0.092525	0.0337484	-0.341105	-0.78482	1.12592	1.12592
chr1	170920001	170930000	-0.27166	-0.303646	-0.316966	-0.386064	-0.330735	-0.337018	-0.350702	-0.368172	-0.418135	-0.61671	-0.432189	-0.688459	-0.494996	-0.383372	-0.527373	-0.446421	-0.31504	-0.422215	-0.3419	-0.262826	-0.49402	-0.318489	-0.383293	-0.339901	0.0305527	-0.167837	FALSE	0.0420032	0.141246	FALSE	0.520172	-0.0265902	FALSE	FALSE	static	-0.284916	-0.487482	-0.343823	0.836478	-1.10761	0.271129	0.836478
chr1	170930001	170940000	-0.353866	-0.362176	-0.407302	-0.483192	-0.279713	-0.37285	-0.375571	-0.384355	-0.497518	-0.766596	-0.575573	-0.811368	-0.594216	-0.393461	-0.638072	-0.489873	-0.348727	-0.459109	-0.361558	-0.319891	-0.565372	-0.294845	-0.358612	-0.339599	0.0335015	-0.218456	FALSE	0.0231771	0.214871	FALSE	0.953528	-0.00358591	FALSE	FALSE	static	-0.347733	-0.587344	-0.362082	0.629915	-1.15305	0.523139	0.629915
chr1	170940001	170950000	-0.41645	-0.394964	-0.454016	-0.537361	-0.216929	-0.406945	-0.349602	-0.337637	-0.536781	-0.829595	-0.641676	-0.81796	-0.604244	-0.388614	-0.663495	-0.497949	-0.374181	-0.504175	-0.389256	-0.381204	-0.539934	-0.296492	-0.313763	-0.364023	0.0363464	-0.233301	FALSE	0.023511	0.227161	FALSE	0.933858	-0.00614054	FALSE	FALSE	static	-0.372437	-0.618397	-0.371397	0.573691	-1.15469	0.581002	0.581002
chr1	171230001	171240000	-0.302671	-0.0527733	-0.15991	-0.192977	-0.178255	-0.11904	-0.152426	-0.335848	-0.292812	-0.416208	-0.129644	-0.219962	-0.259987	-0.0568171	0.0345091	0.00211496	-0.493856	-0.258812	-0.107473	-0.0862545	-0.180155	-0.403033	-0.176115	-0.394588	0.870145	0.0193867	FALSE	0.411703	-0.095185	FALSE	0.395608	-0.0757983	FALSE	FALSE	static	-0.188945	-0.150849	-0.233377	0.0511366	0.973451	-1.02459	0.973451
chr1	171470001	171480000	-0.305256	-0.245253	-0.131952	-0.460738	-0.341888	-0.439475	-0.326578	-0.338803	-0.242545	-0.174569	-0.287887	-0.138706	-0.159677	-0.283004	-0.31524	-0.226743	-0.155761	0.0258081	-0.102403	0.0777466	-0.272703	-0.180693	-0.202354	-0.0116556	0.170899	0.0951967	FALSE	0.0933224	0.125794	FALSE	0.0117292	0.220991	FALSE	FALSE	static	-0.299619	-0.227596	-0.0913391	-0.883304	-0.202421	1.08573	1.08573
chr1	171480001	171490000	-0.314696	-0.272805	-0.148318	-0.451204	-0.366996	-0.457114	-0.401207	-0.388791	-0.262291	-0.198604	-0.329341	-0.166508	-0.204039	-0.356381	-0.406126	-0.311684	-0.207782	-0.0826044	-0.184758	-0.0338763	-0.346461	-0.245089	-0.222657	-0.0821447	0.338097	0.0707697	FALSE	0.137188	0.1037	FALSE	0.0221834	0.17447	FALSE	FALSE	static	-0.31903	-0.278827	-0.161391	-0.805097	-0.314295	1.11939	1.11939
chr1	171790001	171800000	-0.289883	-0.215251	-0.129932	-0.227057	-0.264975	-0.289087	-0.270427	-0.16163	-0.159207	-0.0930896	-0.121105	-0.212083	-0.150013	-0.0921672	-0.240684	-0.198278	-0.448146	-0.270956	-0.179982	-0.408292	-0.274332	-0.405085	-0.552741	-0.282916	0.111603	0.0727019	FALSE	0.0166047	-0.194478	FALSE	0.0817098	-0.121776	FALSE	FALSE	static	-0.216771	-0.12267	-0.307185	-0.0133245	1.0066	-0.993271	1.0066
chr1	171800001	171810000	-0.207633	-0.157579	-0.110403	-0.158461	-0.159715	-0.213655	-0.190442	-0.124707	-0.137127	-0.0834104	-0.148074	-0.167668	-0.125509	0.0439405	-0.159853	-0.0867459	-0.333772	-0.212779	-0.141218	-0.343445	-0.210984	-0.34721	-0.415295	-0.194082	0.19726	0.0572685	FALSE	0.0141419	-0.166792	FALSE	0.0523156	-0.109524	FALSE	FALSE	static	-0.152708	-0.0852863	-0.232617	0.0564392	0.970585	-1.02702	0.970585
chr1	171990001	172000000	-0.617336	-0.532476	-0.646532	-0.576557	-0.39755	-0.41539	-0.579861	-0.376326	-0.586292	-0.519514	-0.410037	-0.470618	-0.43276	-0.531916	-0.578026	-0.337923	-0.427016	-0.547854	-0.610561	-0.438987	-0.54969	-0.592351	-0.553866	-0.416191	0.676412	0.0343678	FALSE	0.603246	-0.0336788	FALSE	0.992965	0.000689016	FALSE	FALSE	static	-0.513811	-0.438174	-0.505303	-0.676974	1.1486	-0.471624	1.1486
chr1	172000001	172010000	-0.535736	-0.449013	-0.570574	-0.462923	-0.295243	-0.294545	-0.465808	-0.3612	-0.493784	-0.382315	-0.355481	-0.435558	-0.385545	-0.512944	-0.487973	-0.3078	-0.463475	-0.504419	-0.597172	-0.399127	-0.518259	-0.46918	-0.497248	-0.397168	0.915143	0.00920524	FALSE	0.236239	-0.0605811	FALSE	0.404177	-0.0513759	FALSE	FALSE	static	-0.423924	-0.363754	-0.465809	-0.118813	1.0541	-0.935286	1.0541
chr1	172410001	172420000	-0.75813	-0.730754	-0.792571	-0.660761	-0.809454	-0.661025	-0.699806	-0.766938	-0.73155	-0.605106	-0.622566	-0.735463	-0.719576	-0.498624	-0.500997	-0.673372	-0.475789	-0.692225	-0.886604	-0.782179	-0.928418	-0.8273	-1.08884	-0.931327	0.12486	0.0990231	FALSE	0.0898059	-0.190678	FALSE	0.353474	-0.0916549	FALSE	FALSE	static	-0.707561	-0.60764	-0.825541	0.0551861	0.971264	-1.02645	0.971264
chr1	172420001	172430000	-0.778997	-0.790687	-0.8253	-0.769132	-0.847035	-0.772483	-0.827455	-0.877188	-0.803788	-0.622372	-0.639317	-0.782504	-0.744452	-0.48841	-0.455967	-0.767403	-0.697843	-0.731627	-0.90511	-0.764016	-1.06249	-0.852119	-1.12295	-0.946986	0.0927053	0.148008	FALSE	0.042258	-0.222366	FALSE	0.36523	-0.0743574	FALSE	FALSE	static	-0.778104	-0.639331	-0.890019	-0.0712858	1.03374	-0.96245	1.03374
chr1	172720001	172730000	-0.9916	-0.897408	-0.963087	-1.05535	-0.993039	-0.860537	-0.978536	-0.885188	-0.932952	-0.947568	-0.900099	-0.983145	-0.715715	-0.703347	-0.516207	-0.868171	-0.799143	-0.927955	-0.951586	-0.894765	-0.908573	-0.849272	-0.893344	-0.968574	0.189615	0.132193	FALSE	0.398649	-0.0782507	FALSE	0.201893	0.053942	FALSE	FALSE	static	-0.935888	-0.821458	-0.882325	-0.978062	1.02058	-0.0425189	1.02058
chr1	172730001	172740000	-1.0892	-0.998016	-1.02297	-1.13431	-1.00086	-0.898596	-0.975029	-0.963312	-1.08982	-1.05598	-1.0177	-1.06252	-0.826013	-0.762482	-0.574846	-0.879882	-0.937597	-0.998835	-1.02345	-0.978265	-1.02325	-0.961658	-0.958179	-1.06394	0.361578	0.101632	FALSE	0.411598	-0.0844913	FALSE	0.704468	0.0171405	FALSE	FALSE	static	-0.998908	-0.916933	-0.97707	-0.815138	1.11585	-0.300712	1.11585
chr1	172830001	172840000	-0.28612	-0.519283	-0.393479	-0.163954	-0.312309	-0.458566	-0.438561	-0.195644	-0.354715	-0.323327	-0.357669	-0.195949	-0.285682	-0.325612	-0.219304	-0.134654	-0.133632	-0.310508	-0.312372	-0.397177	-0.236921	-0.360287	-0.309323	-0.68598	0.402754	0.0713757	FALSE	0.486735	-0.0686613	FALSE	0.982986	0.00271442	FALSE	FALSE	static	-0.276967	-0.265763	-0.289594	0.0397977	0.979507	-1.0193	0.979507
chr1	172990001	173000000	0.0742479	0.0875978	0.114129	0.102423	0.0790727	0.183462	0.0340654	0.0119091	0.0731365	0.0010435	-0.0795774	0.199202	0.00786499	-0.0191553	0.191414	0.0208518	0.151541	0.210104	0.183928	0.0990918	0.132513	0.140392	-0.0359099	0.0546766	0.579002	-0.036516	FALSE	0.306777	0.0676946	FALSE	0.514138	0.0311786	FALSE	FALSE	static	0.10449	0.061694	0.135356	0.107493	-1.0494	0.941911	0.941911
chr1	173000001	173010000	0.127298	0.149782	0.113257	0.0734592	0.0779017	0.237677	0.0159606	0.123155	0.0996807	0.0771743	-0.00872182	0.289627	0.0131494	-0.0397443	0.227338	0.0482301	0.202105	0.194537	0.170577	0.116866	0.168729	0.179987	0.000370666	0.0387387	0.747007	-0.0264696	FALSE	0.552166	0.0456472	FALSE	0.718499	0.0191776	FALSE	FALSE	static	0.127844	0.112249	0.158751	-0.215646	-0.874583	1.09023	1.09023
chr1	173200001	173210000	-0.528241	-0.521128	-0.61081	-0.813448	-0.664338	-0.497396	-0.564307	-0.577874	-0.392687	-0.421567	-0.547268	-0.352528	-0.457291	-0.387011	-0.421236	-0.411688	-0.391363	-0.378119	-0.543808	-0.469229	-0.440421	-0.455842	-0.448358	-0.471981	0.0241802	0.173283	FALSE	0.545094	-0.0259806	FALSE	0.021823	0.147303	FALSE	FALSE	static	-0.53509	-0.398367	-0.441522	-1.0983	0.857866	0.240431	0.857866
chr1	173210001	173220000	-0.5126	-0.493195	-0.596035	-0.863404	-0.616376	-0.504618	-0.571466	-0.618803	-0.368619	-0.417133	-0.536312	-0.373278	-0.483079	-0.438064	-0.452686	-0.431146	-0.381506	-0.419929	-0.515105	-0.420983	-0.54563	-0.403274	-0.43053	-0.463572	0.0525568	0.159523	FALSE	0.832488	-0.0100266	FALSE	0.0371187	0.149496	FALSE	FALSE	static	-0.527195	-0.408363	-0.443886	-1.10466	0.843518	0.261145	0.843518
chr1	173410001	173420000	-0.799547	-0.754403	-0.787535	-0.871945	-0.715654	-0.775324	-0.990271	-0.934374	-0.741689	-0.912861	-0.719779	-0.943283	-0.576112	-0.796039	-0.610295	-0.755524	-0.81072	-0.8028	-1.09117	-0.794247	-0.720589	-0.894957	-0.739167	-0.764177	0.426313	0.0716838	FALSE	0.456013	-0.0702805	FALSE	0.988092	0.00140324	FALSE	FALSE	static	-0.899135	-0.746133	-0.878245	-0.698651	1.14551	-0.446862	1.14551
chr1	173420001	173430000	-0.741842	-0.692262	-0.747151	-0.814494	-0.67577	-0.650919	-0.825104	-0.897252	-0.712548	-0.927963	-0.687971	-0.847247	-0.522193	-0.706954	-0.567089	-0.72859	-0.685356	-0.679708	-0.973447	-0.708362	-0.648778	-0.862227	-0.638526	-0.721532	0.647347	0.04303	FALSE	0.795675	-0.0271726	FALSE	0.843487	0.0158574	FALSE	FALSE	static	-0.794033	-0.705134	-0.798639	-0.533102	1.1536	-0.620495	1.1536
chr1	173830001	173840000	-0.479535	-0.358709	-0.53015	-0.597762	-0.560184	-0.40915	-0.563264	-0.498185	-0.429994	-0.436319	-0.446661	-0.401226	-0.218855	-0.488383	-0.476278	-0.449466	-0.552781	-0.239394	-0.401939	-0.177804	-0.243612	-0.438979	-0.313893	-0.223224	0.212405	0.0812195	FALSE	0.243724	0.0944446	FALSE	0.0306063	0.175664	FALSE	FALSE	static	-0.441485	-0.382411	-0.296767	-0.93357	-0.121718	1.05529	1.05529
chr1	173840001	173850000	-0.467894	-0.396376	-0.558073	-0.688499	-0.592785	-0.395202	-0.504327	-0.502805	-0.424107	-0.540618	-0.409775	-0.389392	-0.174077	-0.4122	-0.487906	-0.431968	-0.476153	-0.198101	-0.288195	-0.174076	-0.226675	-0.402265	-0.283601	-0.182258	0.195939	0.10449	FALSE	0.102391	0.12984	FALSE	0.00530562	0.23433	TRUE	TRUE	up.late	-0.452791	-0.382798	-0.257502	-0.893738	-0.186316	1.08005	1.08005
chr1	173850001	173860000	-0.443527	-0.419132	-0.585122	-0.62183	-0.555222	-0.355611	-0.3609	-0.456231	-0.392152	-0.555267	-0.419673	-0.380485	-0.138197	-0.312362	-0.476248	-0.365773	-0.364525	-0.180112	-0.158342	-0.171323	-0.188996	-0.313801	-0.235022	-0.108445	0.28116	0.0946772	FALSE	0.0419377	0.164949	FALSE	0.00160204	0.259626	TRUE	TRUE	up.late	-0.429291	-0.369638	-0.196302	-0.805985	-0.313102	1.11909	1.11909
chr1	174080001	174090000	-0.17365	-0.130655	-0.017321	-0.113474	-0.210273	-0.0813772	-0.159417	-0.115148	-0.302075	-0.24028	-0.0731325	-0.227445	-0.275453	-0.183007	-0.0831781	-0.250728	0.17283	-0.150558	0.00580008	0.129571	0.044328	-0.0249043	0.0125587	-0.109826	0.173874	-0.079248	FALSE	0.00809166	0.214387	TRUE	0.0411219	0.135139	FALSE	TRUE	down.early	-0.0813681	-0.188602	0.0450623	-0.0547064	-0.971524	1.02623	1.02623
chr1	174230001	174240000	-0.847983	-0.76661	-0.57909	-0.706993	-0.464618	-0.707056	-0.641552	-0.569342	-0.516061	-0.599372	-0.666862	-0.660379	-0.58242	-0.738344	-0.546607	-0.347985	-0.616859	-0.573513	-0.644347	-0.726654	-0.513199	-0.691331	-0.675681	-0.76171	0.411078	0.0781519	FALSE	0.37174	-0.0681581	FALSE	0.905887	0.00999373	FALSE	FALSE	static	-0.653328	-0.565177	-0.626004	-0.853019	1.1005	-0.247485	1.1005
chr1	174240001	174250000	-0.93772	-0.849251	-0.636682	-0.796666	-0.487339	-0.769713	-0.68821	-0.661176	-0.532296	-0.640889	-0.711881	-0.733678	-0.712931	-0.781783	-0.592334	-0.427593	-0.622464	-0.664212	-0.676082	-0.639124	-0.514838	-0.750898	-0.747843	-0.694842	0.396624	0.0866714	FALSE	0.791413	-0.0221147	FALSE	0.424366	0.0645567	FALSE	FALSE	static	-0.724689	-0.621434	-0.637052	-1.14328	0.711945	0.431333	0.711945
chr1	174740001	174750000	-0.863087	-0.783782	-0.957726	-0.877276	-0.812965	-0.697041	-0.892815	-0.70183	-0.867016	-0.985192	-0.691855	-1.04755	-0.706817	-0.801308	-0.607433	-0.702242	-0.683187	-0.813761	-1.11187	-0.699377	-0.771586	-1.07582	-0.878725	-0.899903	0.84822	0.0221386	FALSE	0.595588	-0.0656024	FALSE	0.654228	-0.0434637	FALSE	FALSE	static	-0.81356	-0.783541	-0.855721	0.111609	0.939514	-1.05112	0.939514
chr1	174750001	174760000	-0.86777	-0.787207	-0.97981	-0.842197	-0.840895	-0.756462	-0.90835	-0.701279	-0.888968	-0.960654	-0.646582	-1.09159	-0.778234	-0.709013	-0.637463	-0.652777	-0.718746	-0.789235	-1.15791	-0.733488	-0.807048	-1.12881	-0.891222	-0.887232	0.733882	0.0398366	FALSE	0.467359	-0.0935513	FALSE	0.586094	-0.0537147	FALSE	FALSE	static	-0.820384	-0.779172	-0.882011	0.13148	0.927756	-1.05924	0.927756
chr1	174990001	175000000	-0.994912	-1.27589	-1.10314	-1.01817	-1.06163	-0.99409	-0.900073	-1.08908	-0.914431	-0.835433	-0.949844	-1.06203	-1.04982	-0.778522	-0.896544	-0.71607	-0.694901	-0.977637	-0.751048	-0.823052	-0.88721	-1.03045	-0.944701	-0.796151	0.0982192	0.154287	FALSE	0.699342	0.0371924	FALSE	0.0225051	0.19148	FALSE	FALSE	static	-1.10885	-0.876557	-0.855907	-1.15158	0.50228	0.649296	0.649296
chr1	175000001	175010000	-1.22941	-1.52725	-1.36843	-1.20918	-1.28279	-1.1706	-1.05069	-1.16356	-1.0854	-0.949439	-1.08399	-1.17448	-1.24273	-1.00742	-1.00822	-0.855566	-0.845728	-1.16927	-1.00666	-1.08674	-1.06148	-1.19917	-1.18615	-0.928908	0.0699117	0.199333	FALSE	0.930372	-0.00960755	FALSE	0.0520714	0.189726	FALSE	FALSE	static	-1.33569	-1.02237	-1.04422	-1.15245	0.638678	0.513769	0.638678
chr1	175020001	175030000	-1.18683	-1.43216	-1.29726	-1.15302	-1.18729	-1.12294	-1.0232	-1.0609	-0.99898	-0.912164	-0.987737	-1.10036	-1.1634	-0.985164	-0.973016	-0.943349	-0.827145	-1.02431	-1.01668	-1.09335	-0.989289	-1.12424	-1.15163	-0.927578	0.0591347	0.174931	FALSE	0.893061	-0.0112561	FALSE	0.0555892	0.163675	FALSE	FALSE	static	-1.27206	-0.973883	-0.994597	-1.15246	0.638437	0.514027	0.638437
chr1	175330001	175340000	-0.535889	-0.396703	-0.560917	-0.528789	-0.173401	-0.347178	-0.350388	-0.19859	-0.231991	-0.316672	-0.182952	-0.350274	-0.386213	-0.301789	-0.266012	-0.218781	-0.539523	-0.381854	-0.738547	-0.41765	-0.460834	-0.513597	-0.444737	-0.923078	0.263364	0.104646	FALSE	0.0248468	-0.270642	FALSE	0.15809	-0.165996	FALSE	FALSE	static	-0.378262	-0.258123	-0.541648	0.101299	0.945495	-1.04679	0.945495
chr1	175340001	175350000	-0.62555	-0.456728	-0.638791	-0.563819	-0.199896	-0.39609	-0.321134	-0.216738	-0.307465	-0.403301	-0.216929	-0.345208	-0.453236	-0.351397	-0.324947	-0.209288	-0.526621	-0.351158	-0.684728	-0.406874	-0.479236	-0.500603	-0.461002	-0.881322	0.355408	0.100872	FALSE	0.0484065	-0.209972	FALSE	0.367528	-0.1091	FALSE	FALSE	static	-0.42274	-0.304844	-0.534645	-0.0173781	1.00858	-0.991198	1.00858
[truncated: 16,144 more rows]
