# Supplementary material for: Genome reorganization and its functional impact during breast cancer progression
Source: bioRxiv preprint, doi:10.1101/2025.05.14.654144, version 5 (2026-05-23)
Supplement: Supplemental Table 5 [file 654144_file23.xlsx]

## Sheet: TableS5-TADs
seqnames1	start1	end1	width1	strand1	seqnames2	start2	end2	width2	strand2	A	T	C
chr1	810000	820000	10001	*	chr1	1510000	1520000	10001	*	TRUE	FALSE	FALSE
chr1	810000	820000	10001	*	chr1	2360000	2370000	10001	*	TRUE	FALSE	FALSE
chr1	1090000	1100000	10001	*	chr1	1490000	1500000	10001	*	FALSE	TRUE	FALSE
chr1	1710000	1720000	10001	*	chr1	1910000	1920000	10001	*	TRUE	TRUE	FALSE
chr1	1920000	1930000	10001	*	chr1	2180000	2190000	10001	*	FALSE	TRUE	FALSE
chr1	1920000	1930000	10001	*	chr1	2360000	2370000	10001	*	TRUE	FALSE	FALSE
chr1	2190000	2200000	10001	*	chr1	2390000	2400000	10001	*	FALSE	TRUE	FALSE
chr1	3430000	3440000	10001	*	chr1	3630000	3640000	10001	*	TRUE	TRUE	FALSE
chr1	3430000	3440000	10001	*	chr1	3890000	3900000	10001	*	TRUE	TRUE	FALSE
chr1	3900000	3910000	10001	*	chr1	5480000	5490000	10001	*	FALSE	TRUE	TRUE
chr1	3900000	3910000	10001	*	chr1	5970000	5980000	10001	*	TRUE	TRUE	TRUE
chr1	5490000	5500000	10001	*	chr1	5730000	5740000	10001	*	TRUE	TRUE	TRUE
chr1	5510000	5520000	10001	*	chr1	5970000	5980000	10001	*	TRUE	FALSE	FALSE
chr1	5740000	5750000	10001	*	chr1	5970000	5980000	10001	*	TRUE	TRUE	TRUE
chr1	5980000	5990000	10001	*	chr1	6350000	6360000	10001	*	TRUE	FALSE	FALSE
chr1	5980000	5990000	10001	*	chr1	6440000	6450000	10001	*	FALSE	FALSE	TRUE
chr1	5980000	5990000	10001	*	chr1	7950000	7960000	10001	*	TRUE	TRUE	TRUE
chr1	5990000	6000000	10001	*	chr1	6240000	6250000	10001	*	FALSE	TRUE	TRUE
chr1	6250000	6260000	10001	*	chr1	6440000	6450000	10001	*	FALSE	TRUE	TRUE
chr1	6430000	6440000	10001	*	chr1	6640000	6650000	10001	*	TRUE	FALSE	FALSE
chr1	6630000	6640000	10001	*	chr1	7650000	7660000	10001	*	TRUE	TRUE	TRUE
chr1	6630000	6640000	10001	*	chr1	7950000	7960000	10001	*	TRUE	TRUE	TRUE
chr1	7660000	7670000	10001	*	chr1	7950000	7960000	10001	*	TRUE	TRUE	TRUE
chr1	7960000	7970000	10001	*	chr1	8350000	8360000	10001	*	TRUE	TRUE	TRUE
chr1	7960000	7970000	10001	*	chr1	8850000	8860000	10001	*	TRUE	FALSE	FALSE
chr1	7960000	7970000	10001	*	chr1	9580000	9590000	10001	*	FALSE	TRUE	TRUE
chr1	8360000	8370000	10001	*	chr1	8740000	8750000	10001	*	FALSE	FALSE	TRUE
chr1	8360000	8370000	10001	*	chr1	8850000	8860000	10001	*	TRUE	TRUE	FALSE
chr1	8550000	8560000	10001	*	chr1	8740000	8750000	10001	*	FALSE	FALSE	TRUE
chr1	8550000	8560000	10001	*	chr1	8850000	8860000	10001	*	TRUE	FALSE	FALSE
chr1	8860000	8870000	10001	*	chr1	9110000	9120000	10001	*	TRUE	TRUE	FALSE
chr1	8860000	8870000	10001	*	chr1	9600000	9610000	10001	*	TRUE	TRUE	FALSE
chr1	9020000	9030000	10001	*	chr1	9250000	9260000	10001	*	FALSE	FALSE	TRUE
chr1	9020000	9030000	10001	*	chr1	9580000	9590000	10001	*	FALSE	FALSE	TRUE
chr1	9240000	9250000	10001	*	chr1	9490000	9500000	10001	*	TRUE	FALSE	FALSE
chr1	9250000	9260000	10001	*	chr1	9580000	9590000	10001	*	TRUE	TRUE	TRUE
chr1	9590000	9600000	10001	*	chr1	9870000	9880000	10001	*	TRUE	TRUE	TRUE
chr1	9590000	9600000	10001	*	chr1	10360000	10370000	10001	*	TRUE	TRUE	TRUE
chr1	9590000	9600000	10001	*	chr1	11020000	11030000	10001	*	TRUE	TRUE	TRUE
chr1	9950000	9960000	10001	*	chr1	10360000	10370000	10001	*	TRUE	TRUE	TRUE
chr1	10370000	10380000	10001	*	chr1	11020000	11030000	10001	*	FALSE	TRUE	FALSE
chr1	10440000	10450000	10001	*	chr1	11010000	11020000	10001	*	TRUE	FALSE	FALSE
chr1	10500000	10510000	10001	*	chr1	10870000	10880000	10001	*	FALSE	FALSE	TRUE
chr1	10500000	10510000	10001	*	chr1	11020000	11030000	10001	*	TRUE	TRUE	TRUE
chr1	11020000	11030000	10001	*	chr1	12030000	12040000	10001	*	TRUE	FALSE	FALSE
chr1	11030000	11040000	10001	*	chr1	11650000	11660000	10001	*	FALSE	TRUE	TRUE
chr1	11030000	11040000	10001	*	chr1	11910000	11920000	10001	*	FALSE	TRUE	TRUE
chr1	12240000	12250000	10001	*	chr1	12620000	12630000	10001	*	FALSE	TRUE	FALSE
chr1	13380000	13390000	10001	*	chr1	13660000	13670000	10001	*	TRUE	FALSE	FALSE
chr1	13380000	13390000	10001	*	chr1	13960000	13970000	10001	*	TRUE	FALSE	FALSE
chr1	13970000	13980000	10001	*	chr1	14550000	14560000	10001	*	TRUE	FALSE	FALSE
chr1	13970000	13980000	10001	*	chr1	15050000	15060000	10001	*	TRUE	TRUE	FALSE
chr1	14750000	14760000	10001	*	chr1	15040000	15050000	10001	*	TRUE	FALSE	FALSE
chr1	15060000	15070000	10001	*	chr1	15310000	15320000	10001	*	TRUE	TRUE	FALSE
chr1	15060000	15070000	10001	*	chr1	15510000	15520000	10001	*	TRUE	TRUE	FALSE
chr1	15320000	15330000	10001	*	chr1	15510000	15520000	10001	*	TRUE	TRUE	FALSE
chr1	15520000	15530000	10001	*	chr1	16010000	16020000	10001	*	FALSE	TRUE	FALSE
chr1	17060000	17070000	10001	*	chr1	17410000	17420000	10001	*	TRUE	TRUE	FALSE
chr1	17420000	17430000	10001	*	chr1	17610000	17620000	10001	*	FALSE	FALSE	TRUE
chr1	17620000	17630000	10001	*	chr1	18580000	18590000	10001	*	FALSE	FALSE	TRUE
chr1	17630000	17640000	10001	*	chr1	18870000	18880000	10001	*	TRUE	TRUE	TRUE
chr1	18590000	18600000	10001	*	chr1	18870000	18880000	10001	*	TRUE	TRUE	TRUE
chr1	18880000	18890000	10001	*	chr1	19070000	19080000	10001	*	TRUE	TRUE	TRUE
chr1	18880000	18890000	10001	*	chr1	19250000	19260000	10001	*	TRUE	TRUE	TRUE
chr1	18880000	18890000	10001	*	chr1	19650000	19660000	10001	*	FALSE	FALSE	TRUE
chr1	18880000	18890000	10001	*	chr1	20500000	20510000	10001	*	TRUE	TRUE	FALSE
chr1	19260000	19270000	10001	*	chr1	19490000	19500000	10001	*	TRUE	FALSE	FALSE
chr1	19260000	19270000	10001	*	chr1	19660000	19670000	10001	*	FALSE	TRUE	TRUE
chr1	19350000	19360000	10001	*	chr1	19660000	19670000	10001	*	FALSE	TRUE	TRUE
chr1	19660000	19670000	10001	*	chr1	20500000	20510000	10001	*	FALSE	FALSE	TRUE
chr1	19670000	19680000	10001	*	chr1	19900000	19910000	10001	*	TRUE	FALSE	TRUE
chr1	19890000	19900000	10001	*	chr1	20090000	20100000	10001	*	FALSE	FALSE	TRUE
chr1	19910000	19920000	10001	*	chr1	20170000	20180000	10001	*	TRUE	TRUE	TRUE
chr1	19920000	19930000	10001	*	chr1	20500000	20510000	10001	*	TRUE	FALSE	FALSE
chr1	20180000	20190000	10001	*	chr1	20500000	20510000	10001	*	TRUE	TRUE	TRUE
chr1	20500000	20510000	10001	*	chr1	21660000	21670000	10001	*	FALSE	TRUE	FALSE
chr1	20510000	20520000	10001	*	chr1	21200000	21210000	10001	*	TRUE	TRUE	TRUE
chr1	20510000	20520000	10001	*	chr1	22010000	22020000	10001	*	TRUE	FALSE	FALSE
chr1	20670000	20680000	10001	*	chr1	21190000	21200000	10001	*	FALSE	FALSE	TRUE
chr1	20780000	20790000	10001	*	chr1	21200000	21210000	10001	*	TRUE	TRUE	FALSE
chr1	21210000	21220000	10001	*	chr1	21660000	21670000	10001	*	TRUE	TRUE	TRUE
chr1	21210000	21220000	10001	*	chr1	22010000	22020000	10001	*	TRUE	FALSE	FALSE
chr1	21380000	21390000	10001	*	chr1	21660000	21670000	10001	*	FALSE	TRUE	TRUE
chr1	21670000	21680000	10001	*	chr1	21970000	21980000	10001	*	TRUE	TRUE	TRUE
chr1	21670000	21680000	10001	*	chr1	22080000	22090000	10001	*	FALSE	TRUE	TRUE
chr1	22020000	22030000	10001	*	chr1	22960000	22970000	10001	*	TRUE	FALSE	FALSE
chr1	22090000	22100000	10001	*	chr1	22420000	22430000	10001	*	TRUE	TRUE	TRUE
chr1	22090000	22100000	10001	*	chr1	22650000	22660000	10001	*	FALSE	TRUE	FALSE
chr1	22090000	22100000	10001	*	chr1	22960000	22970000	10001	*	FALSE	TRUE	FALSE
chr1	22420000	22430000	10001	*	chr1	22960000	22970000	10001	*	FALSE	FALSE	TRUE
chr1	22430000	22440000	10001	*	chr1	22650000	22660000	10001	*	TRUE	TRUE	TRUE
chr1	22660000	22670000	10001	*	chr1	22960000	22970000	10001	*	TRUE	TRUE	TRUE
chr1	22720000	22730000	10001	*	chr1	22960000	22970000	10001	*	TRUE	TRUE	TRUE
chr1	22970000	22980000	10001	*	chr1	23280000	23290000	10001	*	TRUE	TRUE	FALSE
chr1	22970000	22980000	10001	*	chr1	23540000	23550000	10001	*	FALSE	TRUE	FALSE
chr1	22970000	22980000	10001	*	chr1	23750000	23760000	10001	*	TRUE	FALSE	FALSE
chr1	22970000	22980000	10001	*	chr1	24260000	24270000	10001	*	FALSE	TRUE	FALSE
chr1	23290000	23300000	10001	*	chr1	23540000	23550000	10001	*	TRUE	TRUE	FALSE
chr1	23550000	23560000	10001	*	chr1	23750000	23760000	10001	*	TRUE	FALSE	FALSE
chr1	23680000	23690000	10001	*	chr1	24050000	24060000	10001	*	FALSE	TRUE	FALSE
chr1	23680000	23690000	10001	*	chr1	24260000	24270000	10001	*	FALSE	TRUE	FALSE
chr1	24060000	24070000	10001	*	chr1	24390000	24400000	10001	*	TRUE	FALSE	FALSE
chr1	24060000	24070000	10001	*	chr1	24650000	24660000	10001	*	TRUE	FALSE	FALSE
chr1	24270000	24280000	10001	*	chr1	24640000	24650000	10001	*	FALSE	TRUE	FALSE
chr1	24400000	24410000	10001	*	chr1	24650000	24660000	10001	*	TRUE	TRUE	FALSE
chr1	24650000	24660000	10001	*	chr1	24840000	24850000	10001	*	FALSE	TRUE	FALSE
chr1	24660000	24670000	10001	*	chr1	25240000	25250000	10001	*	TRUE	FALSE	FALSE
chr1	24850000	24860000	10001	*	chr1	25110000	25120000	10001	*	FALSE	TRUE	FALSE
chr1	24850000	24860000	10001	*	chr1	25230000	25240000	10001	*	FALSE	TRUE	FALSE
chr1	25330000	25340000	10001	*	chr1	25530000	25540000	10001	*	FALSE	TRUE	FALSE
chr1	25330000	25340000	10001	*	chr1	25810000	25820000	10001	*	TRUE	TRUE	TRUE
chr1	25330000	25340000	10001	*	chr1	26460000	26470000	10001	*	TRUE	TRUE	TRUE
chr1	25410000	25420000	10001	*	chr1	25810000	25820000	10001	*	TRUE	FALSE	FALSE
chr1	25530000	25540000	10001	*	chr1	25810000	25820000	10001	*	FALSE	TRUE	TRUE
chr1	25820000	25830000	10001	*	chr1	26010000	26020000	10001	*	TRUE	FALSE	FALSE
chr1	26020000	26030000	10001	*	chr1	26460000	26470000	10001	*	TRUE	TRUE	TRUE
chr1	26250000	26260000	10001	*	chr1	26460000	26470000	10001	*	TRUE	TRUE	TRUE
chr1	26470000	26480000	10001	*	chr1	26890000	26900000	10001	*	TRUE	TRUE	TRUE
chr1	26470000	26480000	10001	*	chr1	27660000	27670000	10001	*	TRUE	FALSE	TRUE
chr1	26470000	26480000	10001	*	chr1	28220000	28230000	10001	*	FALSE	TRUE	FALSE
chr1	26590000	26600000	10001	*	chr1	26890000	26900000	10001	*	TRUE	TRUE	TRUE
chr1	26900000	26910000	10001	*	chr1	27100000	27110000	10001	*	TRUE	TRUE	FALSE
chr1	27110000	27120000	10001	*	chr1	27660000	27670000	10001	*	TRUE	FALSE	FALSE
chr1	27410000	27420000	10001	*	chr1	27660000	27670000	10001	*	TRUE	TRUE	TRUE
chr1	27670000	27680000	10001	*	chr1	28000000	28010000	10001	*	TRUE	FALSE	FALSE
chr1	27670000	27680000	10001	*	chr1	28230000	28240000	10001	*	FALSE	FALSE	TRUE
chr1	27670000	27680000	10001	*	chr1	28510000	28520000	10001	*	TRUE	FALSE	FALSE
chr1	27670000	27680000	10001	*	chr1	29220000	29230000	10001	*	FALSE	FALSE	TRUE
chr1	28010000	28020000	10001	*	chr1	28220000	28230000	10001	*	TRUE	FALSE	FALSE
chr1	28230000	28240000	10001	*	chr1	28510000	28520000	10001	*	TRUE	FALSE	FALSE
chr1	28230000	28240000	10001	*	chr1	28610000	28620000	10001	*	FALSE	TRUE	FALSE
chr1	28230000	28240000	10001	*	chr1	29220000	29230000	10001	*	FALSE	TRUE	FALSE
chr1	28520000	28530000	10001	*	chr1	28770000	28780000	10001	*	TRUE	FALSE	FALSE
chr1	28520000	28530000	10001	*	chr1	29210000	29220000	10001	*	TRUE	FALSE	FALSE
chr1	28520000	28530000	10001	*	chr1	30710000	30720000	10001	*	TRUE	FALSE	FALSE
chr1	28620000	28630000	10001	*	chr1	28880000	28890000	10001	*	FALSE	TRUE	TRUE
chr1	28890000	28900000	10001	*	chr1	29220000	29230000	10001	*	TRUE	TRUE	TRUE
chr1	29220000	29230000	10001	*	chr1	30090000	30100000	10001	*	TRUE	FALSE	FALSE
chr1	29230000	29240000	10001	*	chr1	29460000	29470000	10001	*	FALSE	TRUE	FALSE
chr1	29230000	29240000	10001	*	chr1	30710000	30720000	10001	*	TRUE	TRUE	TRUE
chr1	30100000	30110000	10001	*	chr1	30360000	30370000	10001	*	FALSE	TRUE	TRUE
chr1	30100000	30110000	10001	*	chr1	30700000	30710000	10001	*	TRUE	TRUE	TRUE
chr1	30370000	30380000	10001	*	chr1	30700000	30710000	10001	*	FALSE	TRUE	TRUE
chr1	30720000	30730000	10001	*	chr1	30930000	30940000	10001	*	TRUE	TRUE	TRUE
chr1	30720000	30730000	10001	*	chr1	31180000	31190000	10001	*	TRUE	FALSE	FALSE
chr1	30720000	30730000	10001	*	chr1	31550000	31560000	10001	*	FALSE	TRUE	FALSE
chr1	30720000	30730000	10001	*	chr1	32380000	32390000	10001	*	TRUE	TRUE	TRUE
chr1	30940000	30950000	10001	*	chr1	31180000	31190000	10001	*	TRUE	FALSE	TRUE
chr1	31190000	31200000	10001	*	chr1	31380000	31390000	10001	*	FALSE	FALSE	TRUE
chr1	31190000	31200000	10001	*	chr1	31550000	31560000	10001	*	TRUE	TRUE	TRUE
chr1	31810000	31820000	10001	*	chr1	32030000	32040000	10001	*	TRUE	TRUE	TRUE
chr1	32020000	32030000	10001	*	chr1	32430000	32440000	10001	*	FALSE	FALSE	TRUE
chr1	32060000	32070000	10001	*	chr1	32380000	32390000	10001	*	TRUE	TRUE	FALSE
chr1	32190000	32200000	10001	*	chr1	32410000	32420000	10001	*	FALSE	TRUE	TRUE
chr1	32390000	32400000	10001	*	chr1	32650000	32660000	10001	*	TRUE	TRUE	TRUE
chr1	32390000	32400000	10001	*	chr1	33090000	33100000	10001	*	TRUE	FALSE	FALSE
chr1	32390000	32400000	10001	*	chr1	33470000	33480000	10001	*	FALSE	TRUE	FALSE
chr1	32420000	32430000	10001	*	chr1	32870000	32880000	10001	*	FALSE	TRUE	TRUE
chr1	32440000	32450000	10001	*	chr1	33460000	33470000	10001	*	FALSE	FALSE	TRUE
chr1	32660000	32670000	10001	*	chr1	32870000	32880000	10001	*	FALSE	TRUE	TRUE
chr1	32880000	32890000	10001	*	chr1	33090000	33100000	10001	*	TRUE	TRUE	TRUE
chr1	33100000	33110000	10001	*	chr1	33290000	33300000	10001	*	FALSE	TRUE	FALSE
chr1	33100000	33110000	10001	*	chr1	33470000	33480000	10001	*	TRUE	TRUE	TRUE
chr1	33100000	33110000	10001	*	chr1	34740000	34750000	10001	*	TRUE	FALSE	FALSE
chr1	33470000	33480000	10001	*	chr1	34740000	34750000	10001	*	FALSE	FALSE	TRUE
chr1	33480000	33490000	10001	*	chr1	34570000	34580000	10001	*	FALSE	TRUE	FALSE
chr1	33480000	33490000	10001	*	chr1	34970000	34980000	10001	*	FALSE	TRUE	FALSE
chr1	33630000	33640000	10001	*	chr1	34570000	34580000	10001	*	FALSE	TRUE	FALSE
chr1	33630000	33640000	10001	*	chr1	34740000	34750000	10001	*	TRUE	FALSE	TRUE
chr1	34750000	34760000	10001	*	chr1	34970000	34980000	10001	*	FALSE	TRUE	FALSE
chr1	34750000	34760000	10001	*	chr1	35160000	35170000	10001	*	TRUE	FALSE	TRUE
chr1	34750000	34760000	10001	*	chr1	35400000	35410000	10001	*	FALSE	FALSE	TRUE
chr1	34750000	34760000	10001	*	chr1	35560000	35570000	10001	*	TRUE	FALSE	FALSE
chr1	34750000	34760000	10001	*	chr1	36080000	36090000	10001	*	FALSE	FALSE	TRUE
chr1	34750000	34760000	10001	*	chr1	36460000	36470000	10001	*	TRUE	FALSE	FALSE
chr1	34980000	34990000	10001	*	chr1	35450000	35460000	10001	*	FALSE	TRUE	FALSE
chr1	34980000	34990000	10001	*	chr1	36450000	36460000	10001	*	FALSE	TRUE	FALSE
chr1	35170000	35180000	10001	*	chr1	35400000	35410000	10001	*	FALSE	FALSE	TRUE
chr1	35170000	35180000	10001	*	chr1	35560000	35570000	10001	*	TRUE	FALSE	FALSE
chr1	35570000	35580000	10001	*	chr1	35800000	35810000	10001	*	TRUE	FALSE	TRUE
chr1	35800000	35810000	10001	*	chr1	36080000	36090000	10001	*	FALSE	FALSE	TRUE
chr1	36090000	36100000	10001	*	chr1	36300000	36310000	10001	*	TRUE	FALSE	TRUE
chr1	36090000	36100000	10001	*	chr1	36450000	36460000	10001	*	TRUE	TRUE	TRUE
chr1	36090000	36100000	10001	*	chr1	37680000	37690000	10001	*	FALSE	FALSE	TRUE
chr1	36460000	36470000	10001	*	chr1	37440000	37450000	10001	*	TRUE	TRUE	TRUE
chr1	36470000	36480000	10001	*	chr1	38840000	38850000	10001	*	TRUE	FALSE	FALSE
chr1	37450000	37460000	10001	*	chr1	37690000	37700000	10001	*	TRUE	TRUE	FALSE
chr1	37450000	37460000	10001	*	chr1	38010000	38020000	10001	*	FALSE	TRUE	FALSE
chr1	37450000	37460000	10001	*	chr1	38840000	38850000	10001	*	FALSE	TRUE	FALSE
chr1	37690000	37700000	10001	*	chr1	39090000	39100000	10001	*	FALSE	FALSE	TRUE
chr1	37700000	37710000	10001	*	chr1	38000000	38010000	10001	*	FALSE	TRUE	TRUE
chr1	38000000	38010000	10001	*	chr1	38840000	38850000	10001	*	TRUE	TRUE	TRUE
chr1	38850000	38860000	10001	*	chr1	39090000	39100000	10001	*	TRUE	TRUE	TRUE
chr1	38850000	38860000	10001	*	chr1	39540000	39550000	10001	*	TRUE	TRUE	FALSE
chr1	38850000	38860000	10001	*	chr1	40030000	40040000	10001	*	TRUE	TRUE	FALSE
chr1	39100000	39110000	10001	*	chr1	39510000	39520000	10001	*	TRUE	TRUE	TRUE
chr1	39100000	39110000	10001	*	chr1	39760000	39770000	10001	*	FALSE	FALSE	TRUE
chr1	39270000	39280000	10001	*	chr1	39510000	39520000	10001	*	FALSE	FALSE	TRUE
chr1	39770000	39780000	10001	*	chr1	41250000	41260000	10001	*	FALSE	FALSE	TRUE
chr1	39810000	39820000	10001	*	chr1	40030000	40040000	10001	*	TRUE	TRUE	TRUE
chr1	40040000	40050000	10001	*	chr1	40430000	40440000	10001	*	TRUE	TRUE	TRUE
chr1	40040000	40050000	10001	*	chr1	40580000	40590000	10001	*	TRUE	FALSE	FALSE
chr1	40040000	40050000	10001	*	chr1	41010000	41020000	10001	*	FALSE	TRUE	FALSE
chr1	40040000	40050000	10001	*	chr1	41230000	41240000	10001	*	TRUE	FALSE	FALSE
chr1	40100000	40110000	10001	*	chr1	40430000	40440000	10001	*	FALSE	TRUE	FALSE
chr1	40530000	40540000	10001	*	chr1	40840000	40850000	10001	*	FALSE	TRUE	FALSE
chr1	40530000	40540000	10001	*	chr1	41010000	41020000	10001	*	FALSE	TRUE	FALSE
chr1	40590000	40600000	10001	*	chr1	40840000	40850000	10001	*	TRUE	FALSE	FALSE
chr1	40590000	40600000	10001	*	chr1	40970000	40980000	10001	*	TRUE	FALSE	TRUE
chr1	40590000	40600000	10001	*	chr1	41250000	41260000	10001	*	FALSE	FALSE	TRUE
chr1	41000000	41010000	10001	*	chr1	41230000	41240000	10001	*	TRUE	TRUE	TRUE
chr1	41020000	41030000	10001	*	chr1	41490000	41500000	10001	*	FALSE	TRUE	FALSE
chr1	41020000	41030000	10001	*	chr1	42760000	42770000	10001	*	FALSE	TRUE	FALSE
chr1	41250000	41260000	10001	*	chr1	41500000	41510000	10001	*	TRUE	TRUE	FALSE
chr1	41250000	41260000	10001	*	chr1	42760000	42770000	10001	*	TRUE	FALSE	TRUE
chr1	41260000	41270000	10001	*	chr1	41540000	41550000	10001	*	FALSE	FALSE	TRUE
chr1	41550000	41560000	10001	*	chr1	42040000	42050000	10001	*	FALSE	FALSE	TRUE
chr1	41580000	41590000	10001	*	chr1	41800000	41810000	10001	*	TRUE	TRUE	TRUE
chr1	41810000	41820000	10001	*	chr1	42040000	42050000	10001	*	FALSE	FALSE	TRUE
chr1	41810000	41820000	10001	*	chr1	42130000	42140000	10001	*	FALSE	TRUE	FALSE
chr1	41810000	41820000	10001	*	chr1	42760000	42770000	10001	*	FALSE	TRUE	FALSE
chr1	42140000	42150000	10001	*	chr1	42760000	42770000	10001	*	TRUE	TRUE	TRUE
chr1	42150000	42160000	10001	*	chr1	42340000	42350000	10001	*	TRUE	FALSE	TRUE
chr1	42350000	42360000	10001	*	chr1	42760000	42770000	10001	*	TRUE	FALSE	FALSE
chr1	42480000	42490000	10001	*	chr1	42760000	42770000	10001	*	FALSE	FALSE	TRUE
chr1	42770000	42780000	10001	*	chr1	43180000	43190000	10001	*	TRUE	TRUE	TRUE
chr1	42770000	42780000	10001	*	chr1	44040000	44050000	10001	*	TRUE	TRUE	TRUE
chr1	42910000	42920000	10001	*	chr1	43170000	43180000	10001	*	TRUE	TRUE	FALSE
chr1	43200000	43210000	10001	*	chr1	43420000	43430000	10001	*	TRUE	TRUE	TRUE
chr1	43530000	43540000	10001	*	chr1	44040000	44050000	10001	*	FALSE	TRUE	TRUE
chr1	43660000	43670000	10001	*	chr1	43940000	43950000	10001	*	TRUE	FALSE	FALSE
chr1	43660000	43670000	10001	*	chr1	44040000	44050000	10001	*	TRUE	FALSE	FALSE
chr1	43770000	43780000	10001	*	chr1	44040000	44050000	10001	*	FALSE	TRUE	TRUE
chr1	44050000	44060000	10001	*	chr1	44600000	44610000	10001	*	FALSE	FALSE	TRUE
chr1	44050000	44060000	10001	*	chr1	44700000	44710000	10001	*	TRUE	TRUE	TRUE
chr1	44340000	44350000	10001	*	chr1	44600000	44610000	10001	*	TRUE	TRUE	TRUE
chr1	44340000	44350000	10001	*	chr1	44700000	44710000	10001	*	TRUE	TRUE	FALSE
chr1	44710000	44720000	10001	*	chr1	45010000	45020000	10001	*	TRUE	TRUE	FALSE
chr1	44710000	44720000	10001	*	chr1	45500000	45510000	10001	*	TRUE	TRUE	TRUE
chr1	44710000	44720000	10001	*	chr1	46360000	46370000	10001	*	TRUE	TRUE	TRUE
chr1	45020000	45030000	10001	*	chr1	45500000	45510000	10001	*	TRUE	TRUE	TRUE
chr1	45580000	45590000	10001	*	chr1	46200000	46210000	10001	*	FALSE	TRUE	FALSE
chr1	45590000	45600000	10001	*	chr1	46020000	46030000	10001	*	TRUE	FALSE	TRUE
chr1	45590000	45600000	10001	*	chr1	46360000	46370000	10001	*	TRUE	TRUE	TRUE
chr1	46030000	46040000	10001	*	chr1	46240000	46250000	10001	*	TRUE	FALSE	TRUE
chr1	46350000	46360000	10001	*	chr1	47070000	47080000	10001	*	TRUE	FALSE	FALSE
chr1	46360000	46370000	10001	*	chr1	47720000	47730000	10001	*	TRUE	FALSE	TRUE
chr1	46370000	46380000	10001	*	chr1	46720000	46730000	10001	*	TRUE	TRUE	TRUE
chr1	46400000	46410000	10001	*	chr1	47060000	47070000	10001	*	FALSE	TRUE	FALSE
chr1	46730000	46740000	10001	*	chr1	47070000	47080000	10001	*	TRUE	TRUE	TRUE
chr1	47070000	47080000	10001	*	chr1	47720000	47730000	10001	*	FALSE	TRUE	FALSE
chr1	47180000	47190000	10001	*	chr1	47380000	47390000	10001	*	FALSE	FALSE	TRUE
chr1	47390000	47400000	10001	*	chr1	47720000	47730000	10001	*	TRUE	FALSE	TRUE
chr1	47730000	47740000	10001	*	chr1	47940000	47950000	10001	*	TRUE	TRUE	TRUE
chr1	47730000	47740000	10001	*	chr1	48070000	48080000	10001	*	TRUE	TRUE	TRUE
chr1	47730000	47740000	10001	*	chr1	48230000	48240000	10001	*	FALSE	TRUE	FALSE
chr1	47730000	47740000	10001	*	chr1	48540000	48550000	10001	*	TRUE	FALSE	TRUE
chr1	48240000	48250000	10001	*	chr1	50350000	50360000	10001	*	FALSE	TRUE	FALSE
chr1	48250000	48260000	10001	*	chr1	48530000	48540000	10001	*	TRUE	TRUE	TRUE
chr1	48550000	48560000	10001	*	chr1	50350000	50360000	10001	*	TRUE	FALSE	TRUE
chr1	49080000	49090000	10001	*	chr1	50300000	50310000	10001	*	TRUE	FALSE	FALSE
chr1	50360000	50370000	10001	*	chr1	50600000	50610000	10001	*	FALSE	FALSE	TRUE
chr1	50360000	50370000	10001	*	chr1	50740000	50750000	10001	*	TRUE	TRUE	TRUE
chr1	50360000	50370000	10001	*	chr1	51190000	51200000	10001	*	TRUE	TRUE	FALSE
chr1	50360000	50370000	10001	*	chr1	51780000	51790000	10001	*	FALSE	TRUE	FALSE
chr1	50360000	50370000	10001	*	chr1	52030000	52040000	10001	*	TRUE	FALSE	TRUE
chr1	50750000	50760000	10001	*	chr1	51190000	51200000	10001	*	TRUE	TRUE	TRUE
chr1	50930000	50940000	10001	*	chr1	51190000	51200000	10001	*	FALSE	FALSE	TRUE
chr1	51200000	51210000	10001	*	chr1	51770000	51780000	10001	*	FALSE	FALSE	TRUE
chr1	51200000	51210000	10001	*	chr1	52000000	52010000	10001	*	FALSE	FALSE	TRUE
chr1	51310000	51320000	10001	*	chr1	51540000	51550000	10001	*	FALSE	TRUE	FALSE
chr1	51310000	51320000	10001	*	chr1	51780000	51790000	10001	*	TRUE	TRUE	FALSE
chr1	51310000	51320000	10001	*	chr1	52050000	52060000	10001	*	TRUE	FALSE	FALSE
chr1	51780000	51790000	10001	*	chr1	52030000	52040000	10001	*	TRUE	TRUE	TRUE
chr1	51790000	51800000	10001	*	chr1	52350000	52360000	10001	*	FALSE	TRUE	FALSE
chr1	51790000	51800000	10001	*	chr1	53230000	53240000	10001	*	FALSE	TRUE	FALSE
chr1	52010000	52020000	10001	*	chr1	52690000	52700000	10001	*	FALSE	FALSE	TRUE
chr1	52010000	52020000	10001	*	chr1	53250000	53260000	10001	*	FALSE	FALSE	TRUE
chr1	52040000	52050000	10001	*	chr1	52350000	52360000	10001	*	TRUE	TRUE	TRUE
chr1	52060000	52070000	10001	*	chr1	52300000	52310000	10001	*	TRUE	FALSE	FALSE
chr1	52060000	52070000	10001	*	chr1	53240000	53250000	10001	*	TRUE	FALSE	FALSE
chr1	52360000	52370000	10001	*	chr1	52690000	52700000	10001	*	TRUE	TRUE	TRUE
chr1	52700000	52710000	10001	*	chr1	53220000	53230000	10001	*	TRUE	TRUE	TRUE
chr1	53240000	53250000	10001	*	chr1	53830000	53840000	10001	*	FALSE	TRUE	FALSE
chr1	53250000	53260000	10001	*	chr1	55030000	55040000	10001	*	TRUE	TRUE	TRUE
chr1	53260000	53270000	10001	*	chr1	53770000	53780000	10001	*	TRUE	FALSE	TRUE
chr1	53420000	53430000	10001	*	chr1	53830000	53840000	10001	*	FALSE	TRUE	FALSE
chr1	53430000	53440000	10001	*	chr1	53770000	53780000	10001	*	TRUE	FALSE	TRUE
chr1	53770000	53780000	10001	*	chr1	54050000	54060000	10001	*	FALSE	FALSE	TRUE
chr1	53850000	53860000	10001	*	chr1	54050000	54060000	10001	*	TRUE	FALSE	TRUE
chr1	54060000	54070000	10001	*	chr1	54490000	54500000	10001	*	FALSE	TRUE	TRUE
chr1	54060000	54070000	10001	*	chr1	55030000	55040000	10001	*	TRUE	TRUE	TRUE
chr1	54830000	54840000	10001	*	chr1	55040000	55050000	10001	*	TRUE	FALSE	TRUE
chr1	55040000	55050000	10001	*	chr1	55280000	55290000	10001	*	TRUE	TRUE	TRUE
chr1	55040000	55050000	10001	*	chr1	56820000	56830000	10001	*	TRUE	TRUE	TRUE
chr1	55350000	55360000	10001	*	chr1	55870000	55880000	10001	*	TRUE	TRUE	TRUE
chr1	55350000	55360000	10001	*	chr1	56580000	56590000	10001	*	TRUE	TRUE	TRUE
chr1	55880000	55890000	10001	*	chr1	56570000	56580000	10001	*	TRUE	TRUE	TRUE
chr1	56590000	56600000	10001	*	chr1	56820000	56830000	10001	*	TRUE	TRUE	TRUE
chr1	56830000	56840000	10001	*	chr1	58500000	58510000	10001	*	TRUE	TRUE	TRUE
chr1	58120000	58130000	10001	*	chr1	58500000	58510000	10001	*	FALSE	TRUE	FALSE
chr1	58170000	58180000	10001	*	chr1	58480000	58490000	10001	*	FALSE	FALSE	TRUE
chr1	58510000	58520000	10001	*	chr1	58700000	58710000	10001	*	TRUE	TRUE	FALSE
chr1	58510000	58520000	10001	*	chr1	59950000	59960000	10001	*	TRUE	TRUE	TRUE
chr1	58710000	58720000	10001	*	chr1	59760000	59770000	10001	*	TRUE	FALSE	FALSE
chr1	58710000	58720000	10001	*	chr1	59950000	59960000	10001	*	TRUE	FALSE	FALSE
chr1	58790000	58800000	10001	*	chr1	59290000	59300000	10001	*	FALSE	TRUE	TRUE
chr1	58790000	58800000	10001	*	chr1	59760000	59770000	10001	*	FALSE	TRUE	TRUE
chr1	59300000	59310000	10001	*	chr1	59690000	59700000	10001	*	FALSE	FALSE	TRUE
chr1	59960000	59970000	10001	*	chr1	60280000	60290000	10001	*	TRUE	TRUE	FALSE
chr1	59960000	59970000	10001	*	chr1	60830000	60840000	10001	*	TRUE	TRUE	TRUE
chr1	59960000	59970000	10001	*	chr1	61850000	61860000	10001	*	FALSE	FALSE	TRUE
chr1	59960000	59970000	10001	*	chr1	62060000	62070000	10001	*	FALSE	TRUE	FALSE
chr1	59960000	59970000	10001	*	chr1	62130000	62140000	10001	*	TRUE	FALSE	FALSE
chr1	60260000	60270000	10001	*	chr1	60810000	60820000	10001	*	FALSE	FALSE	TRUE
chr1	60290000	60300000	10001	*	chr1	60760000	60770000	10001	*	TRUE	FALSE	FALSE
chr1	61050000	61060000	10001	*	chr1	61340000	61350000	10001	*	FALSE	TRUE	FALSE
chr1	61050000	61060000	10001	*	chr1	61460000	61470000	10001	*	FALSE	FALSE	TRUE
chr1	61050000	61060000	10001	*	chr1	61670000	61680000	10001	*	TRUE	FALSE	FALSE
chr1	61050000	61060000	10001	*	chr1	61850000	61860000	10001	*	FALSE	FALSE	TRUE
chr1	61050000	61060000	10001	*	chr1	62130000	62140000	10001	*	TRUE	FALSE	FALSE
chr1	61350000	61360000	10001	*	chr1	61860000	61870000	10001	*	FALSE	TRUE	FALSE
chr1	61350000	61360000	10001	*	chr1	62060000	62070000	10001	*	FALSE	TRUE	FALSE
chr1	61860000	61870000	10001	*	chr1	62820000	62830000	10001	*	FALSE	FALSE	TRUE
chr1	61870000	61880000	10001	*	chr1	62060000	62070000	10001	*	FALSE	TRUE	FALSE
chr1	61870000	61880000	10001	*	chr1	62140000	62150000	10001	*	TRUE	FALSE	TRUE
chr1	62070000	62080000	10001	*	chr1	62430000	62440000	10001	*	FALSE	TRUE	FALSE
chr1	62070000	62080000	10001	*	chr1	62810000	62820000	10001	*	FALSE	TRUE	FALSE
chr1	62140000	62150000	10001	*	chr1	62430000	62440000	10001	*	TRUE	TRUE	TRUE
chr1	62140000	62150000	10001	*	chr1	63540000	63550000	10001	*	TRUE	FALSE	FALSE
chr1	62440000	62450000	10001	*	chr1	62820000	62830000	10001	*	FALSE	TRUE	TRUE
chr1	62450000	62460000	10001	*	chr1	62750000	62760000	10001	*	TRUE	TRUE	TRUE
chr1	62760000	62770000	10001	*	chr1	63540000	63550000	10001	*	TRUE	FALSE	FALSE
chr1	62830000	62840000	10001	*	chr1	63310000	63320000	10001	*	FALSE	TRUE	TRUE
chr1	62830000	62840000	10001	*	chr1	63530000	63540000	10001	*	FALSE	TRUE	TRUE
chr1	62840000	62850000	10001	*	chr1	63150000	63160000	10001	*	TRUE	FALSE	FALSE
chr1	63160000	63170000	10001	*	chr1	63540000	63550000	10001	*	TRUE	FALSE	FALSE
chr1	63300000	63310000	10001	*	chr1	63530000	63540000	10001	*	FALSE	FALSE	TRUE
chr1	63540000	63550000	10001	*	chr1	64250000	64260000	10001	*	TRUE	TRUE	TRUE
chr1	63550000	63560000	10001	*	chr1	63920000	63930000	10001	*	TRUE	FALSE	FALSE
chr1	63690000	63700000	10001	*	chr1	64140000	64150000	10001	*	FALSE	TRUE	TRUE
chr1	63700000	63710000	10001	*	chr1	63920000	63930000	10001	*	TRUE	TRUE	TRUE
chr1	63930000	63940000	10001	*	chr1	64130000	64140000	10001	*	TRUE	TRUE	TRUE
chr1	64250000	64260000	10001	*	chr1	64450000	64460000	10001	*	FALSE	TRUE	FALSE
chr1	64260000	64270000	10001	*	chr1	64500000	64510000	10001	*	FALSE	FALSE	TRUE
chr1	64260000	64270000	10001	*	chr1	64680000	64690000	10001	*	TRUE	TRUE	TRUE
chr1	64260000	64270000	10001	*	chr1	64820000	64830000	10001	*	TRUE	TRUE	TRUE
chr1	64260000	64270000	10001	*	chr1	65040000	65050000	10001	*	TRUE	FALSE	FALSE
chr1	64460000	64470000	10001	*	chr1	64670000	64680000	10001	*	FALSE	TRUE	FALSE
chr1	64830000	64840000	10001	*	chr1	65040000	65050000	10001	*	TRUE	TRUE	TRUE
chr1	64830000	64840000	10001	*	chr1	65220000	65230000	10001	*	FALSE	TRUE	TRUE
chr1	64830000	64840000	10001	*	chr1	66750000	66760000	10001	*	FALSE	TRUE	TRUE
chr1	65050000	65060000	10001	*	chr1	65690000	65700000	10001	*	TRUE	FALSE	FALSE
chr1	65050000	65060000	10001	*	chr1	66750000	66760000	10001	*	TRUE	FALSE	FALSE
chr1	65220000	65230000	10001	*	chr1	65690000	65700000	10001	*	TRUE	TRUE	TRUE
chr1	65230000	65240000	10001	*	chr1	65430000	65440000	10001	*	FALSE	TRUE	TRUE
chr1	65430000	65440000	10001	*	chr1	65680000	65690000	10001	*	FALSE	TRUE	FALSE
chr1	65700000	65710000	10001	*	chr1	65950000	65960000	10001	*	TRUE	TRUE	TRUE
chr1	65960000	65970000	10001	*	chr1	66250000	66260000	10001	*	TRUE	TRUE	TRUE
chr1	66260000	66270000	10001	*	chr1	66750000	66760000	10001	*	TRUE	TRUE	TRUE
chr1	66450000	66460000	10001	*	chr1	66750000	66760000	10001	*	TRUE	TRUE	TRUE
chr1	66750000	66760000	10001	*	chr1	68380000	68390000	10001	*	FALSE	FALSE	TRUE
chr1	66760000	66770000	10001	*	chr1	66990000	67000000	10001	*	TRUE	FALSE	TRUE
chr1	66760000	66770000	10001	*	chr1	67160000	67170000	10001	*	FALSE	TRUE	FALSE
chr1	66760000	66770000	10001	*	chr1	67500000	67510000	10001	*	TRUE	TRUE	TRUE
chr1	66760000	66770000	10001	*	chr1	68490000	68500000	10001	*	TRUE	TRUE	FALSE
chr1	67170000	67180000	10001	*	chr1	67500000	67510000	10001	*	TRUE	TRUE	TRUE
chr1	67510000	67520000	10001	*	chr1	67760000	67770000	10001	*	TRUE	TRUE	TRUE
chr1	67520000	67530000	10001	*	chr1	68490000	68500000	10001	*	TRUE	TRUE	FALSE
chr1	67770000	67780000	10001	*	chr1	68110000	68120000	10001	*	FALSE	FALSE	TRUE
chr1	67770000	67780000	10001	*	chr1	68380000	68390000	10001	*	FALSE	FALSE	TRUE
chr1	67850000	67860000	10001	*	chr1	68110000	68120000	10001	*	TRUE	TRUE	FALSE
chr1	68120000	68130000	10001	*	chr1	68380000	68390000	10001	*	FALSE	FALSE	TRUE
chr1	68120000	68130000	10001	*	chr1	68490000	68500000	10001	*	TRUE	TRUE	FALSE
chr1	68390000	68400000	10001	*	chr1	69740000	69750000	10001	*	FALSE	FALSE	TRUE
chr1	68500000	68510000	10001	*	chr1	69740000	69750000	10001	*	TRUE	TRUE	FALSE
chr1	68500000	68510000	10001	*	chr1	70110000	70120000	10001	*	TRUE	FALSE	FALSE
chr1	68500000	68510000	10001	*	chr1	71070000	71080000	10001	*	FALSE	TRUE	FALSE
chr1	69750000	69760000	10001	*	chr1	70020000	70030000	10001	*	FALSE	TRUE	TRUE
chr1	69750000	69760000	10001	*	chr1	70110000	70120000	10001	*	TRUE	FALSE	FALSE
chr1	69750000	69760000	10001	*	chr1	70510000	70520000	10001	*	FALSE	FALSE	TRUE
chr1	70020000	70030000	10001	*	chr1	70510000	70520000	10001	*	FALSE	TRUE	FALSE
chr1	70020000	70030000	10001	*	chr1	71070000	71080000	10001	*	FALSE	TRUE	FALSE
chr1	70110000	70120000	10001	*	chr1	70510000	70520000	10001	*	TRUE	FALSE	TRUE
chr1	70120000	70130000	10001	*	chr1	71070000	71080000	10001	*	TRUE	FALSE	FALSE
chr1	70520000	70530000	10001	*	chr1	71050000	71060000	10001	*	TRUE	TRUE	TRUE
chr1	71080000	71090000	10001	*	chr1	71520000	71530000	10001	*	TRUE	TRUE	TRUE
chr1	71080000	71090000	10001	*	chr1	71800000	71810000	10001	*	FALSE	FALSE	TRUE
chr1	71080000	71090000	10001	*	chr1	72070000	72080000	10001	*	TRUE	FALSE	FALSE
chr1	71080000	71090000	10001	*	chr1	72640000	72650000	10001	*	FALSE	TRUE	FALSE
chr1	71200000	71210000	10001	*	chr1	71520000	71530000	10001	*	TRUE	TRUE	TRUE
chr1	71530000	71540000	10001	*	chr1	71800000	71810000	10001	*	FALSE	FALSE	TRUE
chr1	71530000	71540000	10001	*	chr1	72070000	72080000	10001	*	TRUE	FALSE	FALSE
chr1	71810000	71820000	10001	*	chr1	72060000	72070000	10001	*	TRUE	FALSE	TRUE
chr1	71810000	71820000	10001	*	chr1	72180000	72190000	10001	*	FALSE	FALSE	TRUE
chr1	71810000	71820000	10001	*	chr1	72590000	72600000	10001	*	FALSE	FALSE	TRUE
chr1	72070000	72080000	10001	*	chr1	72300000	72310000	10001	*	TRUE	TRUE	FALSE
chr1	72080000	72090000	10001	*	chr1	74000000	74010000	10001	*	TRUE	FALSE	FALSE
chr1	72310000	72320000	10001	*	chr1	72620000	72630000	10001	*	TRUE	TRUE	TRUE
chr1	72600000	72610000	10001	*	chr1	72910000	72920000	10001	*	FALSE	FALSE	TRUE
chr1	72600000	72610000	10001	*	chr1	74740000	74750000	10001	*	FALSE	FALSE	TRUE
chr1	72650000	72660000	10001	*	chr1	72900000	72910000	10001	*	FALSE	TRUE	FALSE
chr1	72650000	72660000	10001	*	chr1	74690000	74700000	10001	*	FALSE	TRUE	FALSE
chr1	72910000	72920000	10001	*	chr1	73130000	73140000	10001	*	FALSE	TRUE	FALSE
chr1	73120000	73130000	10001	*	chr1	74000000	74010000	10001	*	TRUE	FALSE	FALSE
chr1	74010000	74020000	10001	*	chr1	74470000	74480000	10001	*	TRUE	FALSE	TRUE
chr1	74010000	74020000	10001	*	chr1	74740000	74750000	10001	*	TRUE	FALSE	TRUE
chr1	74490000	74500000	10001	*	chr1	74690000	74700000	10001	*	TRUE	TRUE	TRUE
chr1	74700000	74710000	10001	*	chr1	75780000	75790000	10001	*	FALSE	TRUE	FALSE
chr1	74740000	74750000	10001	*	chr1	75200000	75210000	10001	*	TRUE	TRUE	TRUE
chr1	74740000	74750000	10001	*	chr1	75820000	75830000	10001	*	TRUE	FALSE	FALSE
chr1	74750000	74760000	10001	*	chr1	75890000	75900000	10001	*	FALSE	FALSE	TRUE
chr1	75210000	75220000	10001	*	chr1	75640000	75650000	10001	*	TRUE	TRUE	TRUE
chr1	75210000	75220000	10001	*	chr1	75890000	75900000	10001	*	FALSE	FALSE	TRUE
chr1	75220000	75230000	10001	*	chr1	75800000	75810000	10001	*	TRUE	TRUE	FALSE
chr1	75650000	75660000	10001	*	chr1	75890000	75900000	10001	*	FALSE	FALSE	TRUE
chr1	75810000	75820000	10001	*	chr1	76150000	76160000	10001	*	TRUE	TRUE	FALSE
chr1	75810000	75820000	10001	*	chr1	77130000	77140000	10001	*	TRUE	TRUE	FALSE
chr1	75810000	75820000	10001	*	chr1	77530000	77540000	10001	*	TRUE	TRUE	FALSE
chr1	75900000	75910000	10001	*	chr1	76140000	76150000	10001	*	FALSE	FALSE	TRUE
chr1	75900000	75910000	10001	*	chr1	77140000	77150000	10001	*	FALSE	FALSE	TRUE
chr1	76320000	76330000	10001	*	chr1	76820000	76830000	10001	*	FALSE	FALSE	TRUE
chr1	76320000	76330000	10001	*	chr1	77120000	77130000	10001	*	TRUE	TRUE	TRUE
chr1	76890000	76900000	10001	*	chr1	77120000	77130000	10001	*	FALSE	FALSE	TRUE
chr1	77140000	77150000	10001	*	chr1	77530000	77540000	10001	*	TRUE	TRUE	TRUE
chr1	77150000	77160000	10001	*	chr1	78110000	78120000	10001	*	FALSE	FALSE	TRUE
chr1	77540000	77550000	10001	*	chr1	77980000	77990000	10001	*	TRUE	TRUE	FALSE
chr1	77540000	77550000	10001	*	chr1	78670000	78680000	10001	*	TRUE	TRUE	FALSE
chr1	77690000	77700000	10001	*	chr1	77980000	77990000	10001	*	TRUE	TRUE	FALSE
chr1	77700000	77710000	10001	*	chr1	77910000	77920000	10001	*	FALSE	FALSE	TRUE
chr1	77920000	77930000	10001	*	chr1	78110000	78120000	10001	*	FALSE	FALSE	TRUE
chr1	78120000	78130000	10001	*	chr1	78820000	78830000	10001	*	FALSE	FALSE	TRUE
chr1	78130000	78140000	10001	*	chr1	78610000	78620000	10001	*	TRUE	TRUE	TRUE
chr1	78130000	78140000	10001	*	chr1	78670000	78680000	10001	*	TRUE	TRUE	FALSE
chr1	78680000	78690000	10001	*	chr1	79240000	79250000	10001	*	TRUE	TRUE	FALSE
chr1	78680000	78690000	10001	*	chr1	80210000	80220000	10001	*	TRUE	TRUE	FALSE
chr1	78830000	78840000	10001	*	chr1	79360000	79370000	10001	*	FALSE	FALSE	TRUE
chr1	78830000	78840000	10001	*	chr1	80200000	80210000	10001	*	FALSE	FALSE	TRUE
chr1	78840000	78850000	10001	*	chr1	79240000	79250000	10001	*	TRUE	TRUE	FALSE
chr1	79480000	79490000	10001	*	chr1	80200000	80210000	10001	*	TRUE	TRUE	TRUE
chr1	80210000	80220000	10001	*	chr1	81790000	81800000	10001	*	TRUE	FALSE	TRUE
chr1	81540000	81550000	10001	*	chr1	81790000	81800000	10001	*	TRUE	FALSE	TRUE
chr1	81800000	81810000	10001	*	chr1	83870000	83880000	10001	*	TRUE	FALSE	TRUE
chr1	83880000	83890000	10001	*	chr1	84130000	84140000	10001	*	TRUE	TRUE	TRUE
chr1	83880000	83890000	10001	*	chr1	84440000	84450000	10001	*	TRUE	FALSE	TRUE
chr1	83880000	83890000	10001	*	chr1	85280000	85290000	10001	*	TRUE	FALSE	TRUE
chr1	83900000	83910000	10001	*	chr1	84930000	84940000	10001	*	FALSE	TRUE	FALSE
chr1	84140000	84150000	10001	*	chr1	84440000	84450000	10001	*	TRUE	TRUE	TRUE
chr1	84450000	84460000	10001	*	chr1	84770000	84780000	10001	*	TRUE	TRUE	TRUE
chr1	84940000	84950000	10001	*	chr1	86350000	86360000	10001	*	FALSE	TRUE	FALSE
chr1	84950000	84960000	10001	*	chr1	85260000	85270000	10001	*	TRUE	TRUE	TRUE
chr1	85270000	85280000	10001	*	chr1	85700000	85710000	10001	*	FALSE	TRUE	FALSE
chr1	85280000	85290000	10001	*	chr1	87100000	87110000	10001	*	TRUE	FALSE	FALSE
chr1	85290000	85300000	10001	*	chr1	85520000	85530000	10001	*	TRUE	TRUE	TRUE
chr1	85300000	85310000	10001	*	chr1	86360000	86370000	10001	*	FALSE	FALSE	TRUE
chr1	85900000	85910000	10001	*	chr1	86350000	86360000	10001	*	FALSE	TRUE	FALSE
chr1	86360000	86370000	10001	*	chr1	86700000	86710000	10001	*	TRUE	TRUE	TRUE
chr1	86360000	86370000	10001	*	chr1	87090000	87100000	10001	*	TRUE	TRUE	TRUE
chr1	86360000	86370000	10001	*	chr1	88640000	88650000	10001	*	FALSE	TRUE	FALSE
chr1	86510000	86520000	10001	*	chr1	86700000	86710000	10001	*	FALSE	FALSE	TRUE
chr1	86710000	86720000	10001	*	chr1	87100000	87110000	10001	*	TRUE	FALSE	FALSE
chr1	86760000	86770000	10001	*	chr1	87090000	87100000	10001	*	FALSE	TRUE	TRUE
chr1	87100000	87110000	10001	*	chr1	87290000	87300000	10001	*	FALSE	FALSE	TRUE
chr1	87110000	87120000	10001	*	chr1	88140000	88150000	10001	*	TRUE	FALSE	FALSE
chr1	87110000	87120000	10001	*	chr1	88890000	88900000	10001	*	TRUE	FALSE	TRUE
chr1	87290000	87300000	10001	*	chr1	88140000	88150000	10001	*	TRUE	FALSE	FALSE
chr1	87300000	87310000	10001	*	chr1	87980000	87990000	10001	*	FALSE	FALSE	TRUE
chr1	88080000	88090000	10001	*	chr1	88640000	88650000	10001	*	FALSE	TRUE	FALSE
chr1	88630000	88640000	10001	*	chr1	88890000	88900000	10001	*	TRUE	TRUE	TRUE
chr1	88650000	88660000	10001	*	chr1	90030000	90040000	10001	*	FALSE	TRUE	FALSE
chr1	88900000	88910000	10001	*	chr1	89460000	89470000	10001	*	TRUE	TRUE	TRUE
chr1	88900000	88910000	10001	*	chr1	90020000	90030000	10001	*	TRUE	FALSE	TRUE
chr1	88980000	88990000	10001	*	chr1	89460000	89470000	10001	*	TRUE	FALSE	FALSE
chr1	89080000	89090000	10001	*	chr1	89460000	89470000	10001	*	FALSE	TRUE	TRUE
chr1	89470000	89480000	10001	*	chr1	89780000	89790000	10001	*	FALSE	TRUE	TRUE
chr1	89790000	89800000	10001	*	chr1	89990000	90000000	10001	*	TRUE	TRUE	TRUE
chr1	90020000	90030000	10001	*	chr1	90710000	90720000	10001	*	TRUE	FALSE	FALSE
chr1	90030000	90040000	10001	*	chr1	91490000	91500000	10001	*	TRUE	TRUE	FALSE
chr1	90040000	90050000	10001	*	chr1	90650000	90660000	10001	*	FALSE	TRUE	TRUE
chr1	90040000	90050000	10001	*	chr1	91270000	91280000	10001	*	FALSE	FALSE	TRUE
chr1	90100000	90110000	10001	*	chr1	90710000	90720000	10001	*	TRUE	FALSE	FALSE
chr1	90660000	90670000	10001	*	chr1	90880000	90890000	10001	*	FALSE	FALSE	TRUE
chr1	90890000	90900000	10001	*	chr1	91170000	91180000	10001	*	FALSE	FALSE	TRUE
chr1	91030000	91040000	10001	*	chr1	91290000	91300000	10001	*	FALSE	TRUE	FALSE
chr1	91280000	91290000	10001	*	chr1	91930000	91940000	10001	*	FALSE	FALSE	TRUE
chr1	91280000	91290000	10001	*	chr1	92820000	92830000	10001	*	FALSE	FALSE	TRUE
chr1	91290000	91300000	10001	*	chr1	91490000	91500000	10001	*	TRUE	TRUE	TRUE
chr1	91500000	91510000	10001	*	chr1	91710000	91720000	10001	*	TRUE	TRUE	FALSE
chr1	91500000	91510000	10001	*	chr1	91930000	91940000	10001	*	TRUE	TRUE	TRUE
chr1	91500000	91510000	10001	*	chr1	92820000	92830000	10001	*	TRUE	TRUE	FALSE
chr1	91720000	91730000	10001	*	chr1	91930000	91940000	10001	*	TRUE	TRUE	FALSE
chr1	91940000	91950000	10001	*	chr1	92300000	92310000	10001	*	TRUE	TRUE	TRUE
chr1	92000000	92010000	10001	*	chr1	92300000	92310000	10001	*	FALSE	FALSE	TRUE
chr1	92310000	92320000	10001	*	chr1	92620000	92630000	10001	*	TRUE	TRUE	TRUE
chr1	92310000	92320000	10001	*	chr1	92820000	92830000	10001	*	TRUE	TRUE	TRUE
chr1	92630000	92640000	10001	*	chr1	92820000	92830000	10001	*	TRUE	TRUE	FALSE
chr1	92830000	92840000	10001	*	chr1	93080000	93090000	10001	*	TRUE	FALSE	TRUE
chr1	92830000	92840000	10001	*	chr1	93250000	93260000	10001	*	FALSE	TRUE	FALSE
chr1	92830000	92840000	10001	*	chr1	93860000	93870000	10001	*	TRUE	TRUE	TRUE
chr1	92830000	92840000	10001	*	chr1	94460000	94470000	10001	*	FALSE	FALSE	TRUE
chr1	92830000	92840000	10001	*	chr1	94810000	94820000	10001	*	FALSE	TRUE	FALSE
chr1	92830000	92840000	10001	*	chr1	95050000	95060000	10001	*	TRUE	FALSE	FALSE
chr1	93440000	93450000	10001	*	chr1	93850000	93860000	10001	*	TRUE	TRUE	TRUE
chr1	93860000	93870000	10001	*	chr1	94460000	94470000	10001	*	FALSE	FALSE	TRUE
chr1	94020000	94030000	10001	*	chr1	94330000	94340000	10001	*	TRUE	TRUE	TRUE
chr1	94020000	94030000	10001	*	chr1	94470000	94480000	10001	*	FALSE	TRUE	FALSE
chr1	94450000	94460000	10001	*	chr1	95060000	95070000	10001	*	TRUE	FALSE	TRUE
chr1	94480000	94490000	10001	*	chr1	94800000	94810000	10001	*	TRUE	TRUE	TRUE
chr1	94820000	94830000	10001	*	chr1	95060000	95070000	10001	*	TRUE	TRUE	TRUE
chr1	94820000	94830000	10001	*	chr1	95290000	95300000	10001	*	FALSE	TRUE	FALSE
chr1	95060000	95070000	10001	*	chr1	96950000	96960000	10001	*	TRUE	FALSE	FALSE
chr1	95070000	95080000	10001	*	chr1	95290000	95300000	10001	*	FALSE	TRUE	FALSE
chr1	95070000	95080000	10001	*	chr1	96860000	96870000	10001	*	FALSE	FALSE	TRUE
chr1	95300000	95310000	10001	*	chr1	96950000	96960000	10001	*	FALSE	TRUE	FALSE
chr1	96230000	96240000	10001	*	chr1	96720000	96730000	10001	*	TRUE	TRUE	FALSE
chr1	96230000	96240000	10001	*	chr1	96860000	96870000	10001	*	FALSE	FALSE	TRUE
chr1	96230000	96240000	10001	*	chr1	96950000	96960000	10001	*	TRUE	TRUE	FALSE
chr1	96660000	96670000	10001	*	chr1	96860000	96870000	10001	*	FALSE	FALSE	TRUE
chr1	96730000	96740000	10001	*	chr1	96950000	96960000	10001	*	FALSE	TRUE	FALSE
chr1	96870000	96880000	10001	*	chr1	97540000	97550000	10001	*	FALSE	FALSE	TRUE
chr1	96870000	96880000	10001	*	chr1	98490000	98500000	10001	*	FALSE	FALSE	TRUE
chr1	96960000	96970000	10001	*	chr1	97530000	97540000	10001	*	TRUE	FALSE	FALSE
chr1	96960000	96970000	10001	*	chr1	97820000	97830000	10001	*	TRUE	FALSE	FALSE
chr1	96960000	96970000	10001	*	chr1	98480000	98490000	10001	*	TRUE	TRUE	FALSE
chr1	97110000	97120000	10001	*	chr1	97540000	97550000	10001	*	FALSE	FALSE	TRUE
chr1	97540000	97550000	10001	*	chr1	97820000	97830000	10001	*	TRUE	FALSE	FALSE
chr1	97820000	97830000	10001	*	chr1	98050000	98060000	10001	*	TRUE	TRUE	TRUE
chr1	98060000	98070000	10001	*	chr1	98460000	98470000	10001	*	TRUE	TRUE	TRUE
chr1	98500000	98510000	10001	*	chr1	98740000	98750000	10001	*	TRUE	TRUE	TRUE
chr1	98500000	98510000	10001	*	chr1	99740000	99750000	10001	*	TRUE	TRUE	TRUE
chr1	98750000	98760000	10001	*	chr1	98990000	99000000	10001	*	TRUE	TRUE	TRUE
chr1	98750000	98760000	10001	*	chr1	99170000	99180000	10001	*	TRUE	TRUE	FALSE
chr1	99180000	99190000	10001	*	chr1	99480000	99490000	10001	*	TRUE	TRUE	TRUE
chr1	99180000	99190000	10001	*	chr1	99740000	99750000	10001	*	TRUE	TRUE	TRUE
chr1	99490000	99500000	10001	*	chr1	99730000	99740000	10001	*	TRUE	TRUE	TRUE
chr1	99750000	99760000	10001	*	chr1	100360000	100370000	10001	*	TRUE	FALSE	FALSE
chr1	99750000	99760000	10001	*	chr1	100890000	100900000	10001	*	TRUE	TRUE	TRUE
chr1	99760000	99770000	10001	*	chr1	100110000	100120000	10001	*	TRUE	FALSE	TRUE
chr1	99760000	99770000	10001	*	chr1	100460000	100470000	10001	*	FALSE	TRUE	TRUE
chr1	100120000	100130000	10001	*	chr1	100460000	100470000	10001	*	FALSE	TRUE	TRUE
chr1	100140000	100150000	10001	*	chr1	100360000	100370000	10001	*	TRUE	FALSE	FALSE
chr1	100460000	100470000	10001	*	chr1	100870000	100880000	10001	*	TRUE	TRUE	TRUE
chr1	100610000	100620000	10001	*	chr1	100860000	100870000	10001	*	TRUE	TRUE	TRUE
chr1	100900000	100910000	10001	*	chr1	101290000	101300000	10001	*	TRUE	TRUE	TRUE
chr1	100900000	100910000	10001	*	chr1	103580000	103590000	10001	*	TRUE	FALSE	FALSE
chr1	101040000	101050000	10001	*	chr1	101230000	101240000	10001	*	TRUE	TRUE	FALSE
chr1	101040000	101050000	10001	*	chr1	101290000	101300000	10001	*	FALSE	FALSE	TRUE
chr1	102990000	103000000	10001	*	chr1	103510000	103520000	10001	*	TRUE	TRUE	TRUE
chr1	104150000	104160000	10001	*	chr1	104600000	104610000	10001	*	TRUE	FALSE	FALSE
chr1	104590000	104600000	10001	*	chr1	105790000	105800000	10001	*	FALSE	TRUE	FALSE
chr1	104760000	104770000	10001	*	chr1	105200000	105210000	10001	*	TRUE	FALSE	FALSE
chr1	104770000	104780000	10001	*	chr1	105790000	105800000	10001	*	TRUE	FALSE	TRUE
chr1	105800000	105810000	10001	*	chr1	107150000	107160000	10001	*	FALSE	FALSE	TRUE
chr1	105800000	105810000	10001	*	chr1	107800000	107810000	10001	*	FALSE	FALSE	TRUE
chr1	107210000	107220000	10001	*	chr1	107470000	107480000	10001	*	TRUE	FALSE	FALSE
chr1	107480000	107490000	10001	*	chr1	107680000	107690000	10001	*	TRUE	FALSE	FALSE
chr1	107690000	107700000	10001	*	chr1	108150000	108160000	10001	*	TRUE	FALSE	FALSE
chr1	107760000	107770000	10001	*	chr1	108150000	108160000	10001	*	TRUE	FALSE	FALSE
chr1	108690000	108700000	10001	*	chr1	108930000	108940000	10001	*	FALSE	TRUE	FALSE
chr1	108940000	108950000	10001	*	chr1	109390000	109400000	10001	*	FALSE	TRUE	FALSE
chr1	109080000	109090000	10001	*	chr1	109420000	109430000	10001	*	FALSE	FALSE	TRUE
chr1	109080000	109090000	10001	*	chr1	110040000	110050000	10001	*	FALSE	FALSE	TRUE
chr1	109500000	109510000	10001	*	chr1	110040000	110050000	10001	*	FALSE	FALSE	TRUE
chr1	109550000	109560000	10001	*	chr1	109770000	109780000	10001	*	FALSE	TRUE	FALSE
chr1	109550000	109560000	10001	*	chr1	110020000	110030000	10001	*	FALSE	TRUE	FALSE
chr1	109780000	109790000	10001	*	chr1	110030000	110040000	10001	*	FALSE	TRUE	TRUE
chr1	110040000	110050000	10001	*	chr1	110500000	110510000	10001	*	TRUE	TRUE	TRUE
chr1	110040000	110050000	10001	*	chr1	112370000	112380000	10001	*	TRUE	TRUE	FALSE
chr1	110050000	110060000	10001	*	chr1	111440000	111450000	10001	*	FALSE	FALSE	TRUE
chr1	110190000	110200000	10001	*	chr1	110510000	110520000	10001	*	FALSE	TRUE	TRUE
chr1	110790000	110800000	10001	*	chr1	111000000	111010000	10001	*	FALSE	FALSE	TRUE
chr1	110790000	110800000	10001	*	chr1	111440000	111450000	10001	*	FALSE	FALSE	TRUE
chr1	111150000	111160000	10001	*	chr1	111440000	111450000	10001	*	TRUE	FALSE	TRUE
chr1	111220000	111230000	10001	*	chr1	111450000	111460000	10001	*	FALSE	TRUE	FALSE
chr1	111450000	111460000	10001	*	chr1	111760000	111770000	10001	*	TRUE	TRUE	TRUE
chr1	111450000	111460000	10001	*	chr1	112370000	112380000	10001	*	TRUE	TRUE	TRUE
chr1	111520000	111530000	10001	*	chr1	111760000	111770000	10001	*	FALSE	FALSE	TRUE
chr1	111770000	111780000	10001	*	chr1	112370000	112380000	10001	*	TRUE	TRUE	TRUE
chr1	112380000	112390000	10001	*	chr1	112620000	112630000	10001	*	TRUE	TRUE	TRUE
chr1	112380000	112390000	10001	*	chr1	112710000	112720000	10001	*	TRUE	TRUE	TRUE
chr1	112380000	112390000	10001	*	chr1	113960000	113970000	10001	*	TRUE	TRUE	TRUE
chr1	112720000	112730000	10001	*	chr1	113050000	113060000	10001	*	TRUE	TRUE	TRUE
chr1	112820000	112830000	10001	*	chr1	113050000	113060000	10001	*	TRUE	FALSE	TRUE
chr1	113060000	113070000	10001	*	chr1	113680000	113690000	10001	*	TRUE	TRUE	TRUE
chr1	113060000	113070000	10001	*	chr1	113960000	113970000	10001	*	TRUE	TRUE	TRUE
chr1	113690000	113700000	10001	*	chr1	113960000	113970000	10001	*	TRUE	TRUE	TRUE
chr1	113970000	113980000	10001	*	chr1	114310000	114320000	10001	*	TRUE	TRUE	TRUE
chr1	113970000	113980000	10001	*	chr1	114720000	114730000	10001	*	TRUE	TRUE	TRUE
chr1	113970000	113980000	10001	*	chr1	115590000	115600000	10001	*	TRUE	TRUE	TRUE
chr1	114320000	114330000	10001	*	chr1	114720000	114730000	10001	*	TRUE	TRUE	TRUE
chr1	114710000	114720000	10001	*	chr1	114950000	114960000	10001	*	TRUE	TRUE	FALSE
chr1	115130000	115140000	10001	*	chr1	115470000	115480000	10001	*	TRUE	TRUE	TRUE
chr1	115130000	115140000	10001	*	chr1	115590000	115600000	10001	*	TRUE	TRUE	TRUE
chr1	115600000	115610000	10001	*	chr1	116040000	116050000	10001	*	FALSE	TRUE	FALSE
chr1	115600000	115610000	10001	*	chr1	116110000	116120000	10001	*	TRUE	FALSE	TRUE
chr1	115600000	115610000	10001	*	chr1	116560000	116570000	10001	*	FALSE	TRUE	FALSE
chr1	115600000	115610000	10001	*	chr1	117050000	117060000	10001	*	TRUE	FALSE	TRUE
chr1	115780000	115790000	10001	*	chr1	116040000	116050000	10001	*	FALSE	TRUE	FALSE
chr1	115780000	115790000	10001	*	chr1	116110000	116120000	10001	*	TRUE	FALSE	TRUE
chr1	116120000	116130000	10001	*	chr1	116370000	116380000	10001	*	TRUE	FALSE	TRUE
chr1	116120000	116130000	10001	*	chr1	116500000	116510000	10001	*	TRUE	TRUE	TRUE
chr1	116120000	116130000	10001	*	chr1	116560000	116570000	10001	*	FALSE	TRUE	FALSE
chr1	116510000	116520000	10001	*	chr1	117050000	117060000	10001	*	TRUE	FALSE	FALSE
chr1	116570000	116580000	10001	*	chr1	117050000	117060000	10001	*	TRUE	TRUE	TRUE
chr1	116730000	116740000	10001	*	chr1	117050000	117060000	10001	*	FALSE	TRUE	TRUE
chr1	116850000	116860000	10001	*	chr1	117050000	117060000	10001	*	FALSE	TRUE	FALSE
chr1	117060000	117070000	10001	*	chr1	117290000	117300000	10001	*	FALSE	TRUE	TRUE
chr1	117060000	117070000	10001	*	chr1	117480000	117490000	10001	*	FALSE	TRUE	FALSE
chr1	117060000	117070000	10001	*	chr1	117910000	117920000	10001	*	TRUE	TRUE	TRUE
chr1	117060000	117070000	10001	*	chr1	119520000	119530000	10001	*	TRUE	FALSE	FALSE
chr1	117060000	117070000	10001	*	chr1	120000000	120010000	10001	*	TRUE	FALSE	TRUE
chr1	117490000	117500000	10001	*	chr1	117760000	117770000	10001	*	FALSE	TRUE	FALSE
chr1	117490000	117500000	10001	*	chr1	117920000	117930000	10001	*	FALSE	TRUE	TRUE
chr1	117920000	117930000	10001	*	chr1	119520000	119530000	10001	*	TRUE	FALSE	FALSE
chr1	117940000	117950000	10001	*	chr1	119850000	119860000	10001	*	FALSE	TRUE	FALSE
chr1	118060000	118070000	10001	*	chr1	119280000	119290000	10001	*	FALSE	FALSE	TRUE
chr1	118060000	118070000	10001	*	chr1	119980000	119990000	10001	*	FALSE	FALSE	TRUE
chr1	119530000	119540000	10001	*	chr1	119740000	119750000	10001	*	TRUE	FALSE	FALSE
chr1	119530000	119540000	10001	*	chr1	119930000	119940000	10001	*	TRUE	FALSE	FALSE
chr1	119620000	119630000	10001	*	chr1	119980000	119990000	10001	*	FALSE	FALSE	TRUE
chr1	149890000	149900000	10001	*	chr1	150210000	150220000	10001	*	TRUE	FALSE	FALSE
chr1	149890000	149900000	10001	*	chr1	151000000	151010000	10001	*	TRUE	FALSE	FALSE
chr1	149890000	149900000	10001	*	chr1	152040000	152050000	10001	*	TRUE	FALSE	FALSE
chr1	150220000	150230000	10001	*	chr1	151000000	151010000	10001	*	TRUE	FALSE	FALSE
chr1	151200000	151210000	10001	*	chr1	151840000	151850000	10001	*	FALSE	FALSE	TRUE
chr1	151200000	151210000	10001	*	chr1	152050000	152060000	10001	*	FALSE	FALSE	TRUE
chr1	151260000	151270000	10001	*	chr1	151840000	151850000	10001	*	TRUE	FALSE	FALSE
chr1	151260000	151270000	10001	*	chr1	152040000	152050000	10001	*	TRUE	FALSE	FALSE
chr1	151850000	151860000	10001	*	chr1	152050000	152060000	10001	*	TRUE	FALSE	TRUE
chr1	152060000	152070000	10001	*	chr1	152590000	152600000	10001	*	FALSE	FALSE	TRUE
chr1	152070000	152080000	10001	*	chr1	152460000	152470000	10001	*	TRUE	FALSE	FALSE
chr1	152070000	152080000	10001	*	chr1	153490000	153500000	10001	*	TRUE	FALSE	FALSE
chr1	152200000	152210000	10001	*	chr1	152460000	152470000	10001	*	TRUE	FALSE	TRUE
chr1	152550000	152560000	10001	*	chr1	153230000	153240000	10001	*	TRUE	FALSE	FALSE
chr1	152550000	152560000	10001	*	chr1	153490000	153500000	10001	*	TRUE	FALSE	FALSE
chr1	152610000	152620000	10001	*	chr1	152860000	152870000	10001	*	FALSE	FALSE	TRUE
chr1	152610000	152620000	10001	*	chr1	153230000	153240000	10001	*	FALSE	FALSE	TRUE
chr1	152620000	152630000	10001	*	chr1	153490000	153500000	10001	*	FALSE	TRUE	TRUE
chr1	152810000	152820000	10001	*	chr1	153230000	153240000	10001	*	FALSE	TRUE	FALSE
chr1	152870000	152880000	10001	*	chr1	153230000	153240000	10001	*	FALSE	FALSE	TRUE
chr1	152940000	152950000	10001	*	chr1	153230000	153240000	10001	*	FALSE	TRUE	FALSE
chr1	153240000	153250000	10001	*	chr1	153490000	153500000	10001	*	TRUE	TRUE	TRUE
chr1	153480000	153490000	10001	*	chr1	153670000	153680000	10001	*	FALSE	TRUE	FALSE
chr1	153500000	153510000	10001	*	chr1	153990000	154000000	10001	*	TRUE	TRUE	TRUE
chr1	153500000	153510000	10001	*	chr1	155080000	155090000	10001	*	TRUE	FALSE	FALSE
chr1	153500000	153510000	10001	*	chr1	155160000	155170000	10001	*	FALSE	TRUE	TRUE
chr1	153790000	153800000	10001	*	chr1	153990000	154000000	10001	*	TRUE	TRUE	TRUE
chr1	154280000	154290000	10001	*	chr1	154560000	154570000	10001	*	FALSE	TRUE	FALSE
chr1	154290000	154300000	10001	*	chr1	154480000	154490000	10001	*	FALSE	TRUE	TRUE
chr1	154570000	154580000	10001	*	chr1	154930000	154940000	10001	*	TRUE	TRUE	TRUE
chr1	154570000	154580000	10001	*	chr1	155160000	155170000	10001	*	FALSE	TRUE	TRUE
chr1	155090000	155100000	10001	*	chr1	155910000	155920000	10001	*	TRUE	FALSE	FALSE
chr1	155090000	155100000	10001	*	chr1	156920000	156930000	10001	*	TRUE	FALSE	FALSE
chr1	155170000	155180000	10001	*	chr1	155610000	155620000	10001	*	FALSE	TRUE	TRUE
chr1	155170000	155180000	10001	*	chr1	155910000	155920000	10001	*	FALSE	FALSE	TRUE
chr1	155170000	155180000	10001	*	chr1	156070000	156080000	10001	*	FALSE	TRUE	FALSE
chr1	155170000	155180000	10001	*	chr1	156610000	156620000	10001	*	FALSE	FALSE	TRUE
chr1	155170000	155180000	10001	*	chr1	156920000	156930000	10001	*	FALSE	TRUE	FALSE
chr1	155330000	155340000	10001	*	chr1	155910000	155920000	10001	*	TRUE	FALSE	FALSE
chr1	155610000	155620000	10001	*	chr1	155910000	155920000	10001	*	FALSE	FALSE	TRUE
chr1	155730000	155740000	10001	*	chr1	156070000	156080000	10001	*	FALSE	TRUE	FALSE
chr1	156080000	156090000	10001	*	chr1	156330000	156340000	10001	*	TRUE	TRUE	TRUE
chr1	156340000	156350000	10001	*	chr1	156610000	156620000	10001	*	TRUE	TRUE	TRUE
chr1	156340000	156350000	10001	*	chr1	156920000	156930000	10001	*	TRUE	TRUE	FALSE
chr1	156620000	156630000	10001	*	chr1	156920000	156930000	10001	*	TRUE	TRUE	TRUE
chr1	156620000	156630000	10001	*	chr1	157150000	157160000	10001	*	FALSE	FALSE	TRUE
chr1	156930000	156940000	10001	*	chr1	157160000	157170000	10001	*	TRUE	TRUE	TRUE
chr1	156930000	156940000	10001	*	chr1	158990000	159000000	10001	*	FALSE	TRUE	FALSE
chr1	156930000	156940000	10001	*	chr1	159080000	159090000	10001	*	TRUE	FALSE	FALSE
chr1	157160000	157170000	10001	*	chr1	158120000	158130000	10001	*	FALSE	FALSE	TRUE
chr1	157170000	157180000	10001	*	chr1	157360000	157370000	10001	*	TRUE	TRUE	TRUE
chr1	157170000	157180000	10001	*	chr1	157500000	157510000	10001	*	TRUE	TRUE	TRUE
chr1	157510000	157520000	10001	*	chr1	157970000	157980000	10001	*	FALSE	TRUE	FALSE
chr1	158130000	158140000	10001	*	chr1	158980000	158990000	10001	*	TRUE	TRUE	FALSE
chr1	158130000	158140000	10001	*	chr1	159090000	159100000	10001	*	TRUE	FALSE	TRUE
chr1	159000000	159010000	10001	*	chr1	159780000	159790000	10001	*	FALSE	TRUE	FALSE
chr1	159000000	159010000	10001	*	chr1	161440000	161450000	10001	*	FALSE	TRUE	FALSE
chr1	159100000	159110000	10001	*	chr1	161440000	161450000	10001	*	TRUE	FALSE	TRUE
chr1	159110000	159120000	10001	*	chr1	159780000	159790000	10001	*	TRUE	TRUE	TRUE
chr1	159110000	159120000	10001	*	chr1	159900000	159910000	10001	*	FALSE	FALSE	TRUE
chr1	159220000	159230000	10001	*	chr1	159770000	159780000	10001	*	TRUE	FALSE	FALSE
chr1	160020000	160030000	10001	*	chr1	160330000	160340000	10001	*	TRUE	TRUE	FALSE
chr1	160100000	160110000	10001	*	chr1	160340000	160350000	10001	*	TRUE	TRUE	TRUE
chr1	160100000	160110000	10001	*	chr1	160640000	160650000	10001	*	FALSE	FALSE	TRUE
chr1	160350000	160360000	10001	*	chr1	160640000	160650000	10001	*	FALSE	FALSE	TRUE
chr1	160350000	160360000	10001	*	chr1	160980000	160990000	10001	*	TRUE	FALSE	FALSE
chr1	160350000	160360000	10001	*	chr1	161440000	161450000	10001	*	TRUE	FALSE	FALSE
chr1	160410000	160420000	10001	*	chr1	160980000	160990000	10001	*	FALSE	TRUE	FALSE
chr1	160410000	160420000	10001	*	chr1	161440000	161450000	10001	*	FALSE	TRUE	FALSE
chr1	160650000	160660000	10001	*	chr1	160980000	160990000	10001	*	FALSE	FALSE	TRUE
chr1	160990000	161000000	10001	*	chr1	161440000	161450000	10001	*	FALSE	FALSE	TRUE
chr1	161160000	161170000	10001	*	chr1	161440000	161450000	10001	*	TRUE	TRUE	TRUE
chr1	161760000	161770000	10001	*	chr1	162040000	162050000	10001	*	TRUE	TRUE	TRUE
chr1	161760000	161770000	10001	*	chr1	162780000	162790000	10001	*	FALSE	FALSE	TRUE
chr1	162050000	162060000	10001	*	chr1	162350000	162360000	10001	*	FALSE	TRUE	TRUE
chr1	162050000	162060000	10001	*	chr1	162600000	162610000	10001	*	TRUE	TRUE	FALSE
chr1	162510000	162520000	10001	*	chr1	162780000	162790000	10001	*	FALSE	FALSE	TRUE
chr1	162610000	162620000	10001	*	chr1	162800000	162810000	10001	*	TRUE	TRUE	FALSE
chr1	162810000	162820000	10001	*	chr1	163320000	163330000	10001	*	TRUE	TRUE	TRUE
chr1	162850000	162860000	10001	*	chr1	163180000	163190000	10001	*	FALSE	FALSE	TRUE
chr1	163320000	163330000	10001	*	chr1	163530000	163540000	10001	*	FALSE	FALSE	TRUE
chr1	163340000	163350000	10001	*	chr1	165100000	165110000	10001	*	TRUE	TRUE	TRUE
chr1	164560000	164570000	10001	*	chr1	164780000	164790000	10001	*	FALSE	TRUE	FALSE
chr1	164790000	164800000	10001	*	chr1	165100000	165110000	10001	*	TRUE	TRUE	TRUE
chr1	165110000	165120000	10001	*	chr1	165370000	165380000	10001	*	TRUE	TRUE	TRUE
chr1	165110000	165120000	10001	*	chr1	165600000	165610000	10001	*	TRUE	TRUE	FALSE
chr1	165110000	165120000	10001	*	chr1	167050000	167060000	10001	*	TRUE	TRUE	TRUE
chr1	165380000	165390000	10001	*	chr1	165600000	165610000	10001	*	TRUE	TRUE	TRUE
chr1	165610000	165620000	10001	*	chr1	165910000	165920000	10001	*	TRUE	TRUE	TRUE
chr1	165710000	165720000	10001	*	chr1	165910000	165920000	10001	*	TRUE	TRUE	FALSE
chr1	165920000	165930000	10001	*	chr1	166490000	166500000	10001	*	FALSE	TRUE	FALSE
chr1	165930000	165940000	10001	*	chr1	166440000	166450000	10001	*	FALSE	FALSE	TRUE
chr1	165930000	165940000	10001	*	chr1	167050000	167060000	10001	*	FALSE	FALSE	TRUE
chr1	166480000	166490000	10001	*	chr1	166830000	166840000	10001	*	TRUE	TRUE	TRUE
chr1	166500000	166510000	10001	*	chr1	167050000	167060000	10001	*	FALSE	TRUE	FALSE
chr1	166840000	166850000	10001	*	chr1	167050000	167060000	10001	*	TRUE	TRUE	TRUE
chr1	167060000	167070000	10001	*	chr1	167540000	167550000	10001	*	TRUE	TRUE	TRUE
chr1	167060000	167070000	10001	*	chr1	168330000	168340000	10001	*	TRUE	TRUE	TRUE
chr1	167230000	167240000	10001	*	chr1	167540000	167550000	10001	*	TRUE	TRUE	TRUE
chr1	167700000	167710000	10001	*	chr1	168080000	168090000	10001	*	TRUE	TRUE	TRUE
chr1	167700000	167710000	10001	*	chr1	168330000	168340000	10001	*	TRUE	TRUE	TRUE
chr1	168090000	168100000	10001	*	chr1	168330000	168340000	10001	*	TRUE	TRUE	TRUE
chr1	168330000	168340000	10001	*	chr1	169810000	169820000	10001	*	FALSE	TRUE	FALSE
chr1	168340000	168350000	10001	*	chr1	168580000	168590000	10001	*	TRUE	TRUE	TRUE
chr1	168340000	168350000	10001	*	chr1	169360000	169370000	10001	*	FALSE	TRUE	TRUE
chr1	168340000	168350000	10001	*	chr1	169540000	169550000	10001	*	TRUE	FALSE	TRUE
chr1	168590000	168600000	10001	*	chr1	169350000	169360000	10001	*	TRUE	TRUE	TRUE
chr1	168610000	168620000	10001	*	chr1	169110000	169120000	10001	*	TRUE	FALSE	FALSE
chr1	169120000	169130000	10001	*	chr1	169340000	169350000	10001	*	TRUE	FALSE	FALSE
chr1	169370000	169380000	10001	*	chr1	169810000	169820000	10001	*	FALSE	TRUE	FALSE
chr1	169550000	169560000	10001	*	chr1	169810000	169820000	10001	*	TRUE	TRUE	TRUE
chr1	169550000	169560000	10001	*	chr1	171470000	171480000	10001	*	TRUE	FALSE	TRUE
chr1	169820000	169830000	10001	*	chr1	171470000	171480000	10001	*	FALSE	TRUE	FALSE
chr1	169900000	169910000	10001	*	chr1	170930000	170940000	10001	*	TRUE	TRUE	TRUE
chr1	170550000	170560000	10001	*	chr1	170920000	170930000	10001	*	TRUE	FALSE	TRUE
chr1	170940000	170950000	10001	*	chr1	171230000	171240000	10001	*	TRUE	TRUE	TRUE
chr1	170940000	170950000	10001	*	chr1	171470000	171480000	10001	*	TRUE	TRUE	TRUE
chr1	171480000	171490000	10001	*	chr1	171790000	171800000	10001	*	TRUE	FALSE	TRUE
chr1	171480000	171490000	10001	*	chr1	172720000	172730000	10001	*	TRUE	TRUE	TRUE
chr1	171800000	171810000	10001	*	chr1	171990000	172000000	10001	*	TRUE	TRUE	TRUE
chr1	172000000	172010000	10001	*	chr1	172410000	172420000	10001	*	TRUE	TRUE	TRUE
chr1	172000000	172010000	10001	*	chr1	172720000	172730000	10001	*	TRUE	TRUE	TRUE
chr1	172420000	172430000	10001	*	chr1	172720000	172730000	10001	*	TRUE	TRUE	TRUE
chr1	172730000	172740000	10001	*	chr1	172990000	173000000	10001	*	FALSE	TRUE	FALSE
chr1	172730000	172740000	10001	*	chr1	173210000	173220000	10001	*	TRUE	FALSE	FALSE
chr1	172730000	172740000	10001	*	chr1	173410000	173420000	10001	*	FALSE	FALSE	TRUE
chr1	172730000	172740000	10001	*	chr1	174230000	174240000	10001	*	TRUE	FALSE	FALSE
chr1	172730000	172740000	10001	*	chr1	174990000	175000000	10001	*	FALSE	TRUE	TRUE
chr1	172830000	172840000	10001	*	chr1	173200000	173210000	10001	*	FALSE	FALSE	TRUE
chr1	173000000	173010000	10001	*	chr1	173200000	173210000	10001	*	TRUE	TRUE	FALSE
chr1	173000000	173010000	10001	*	chr1	173420000	173430000	10001	*	FALSE	TRUE	FALSE
chr1	173210000	173220000	10001	*	chr1	173420000	173430000	10001	*	FALSE	TRUE	TRUE
chr1	173410000	173420000	10001	*	chr1	174230000	174240000	10001	*	TRUE	FALSE	FALSE
chr1	173420000	173430000	10001	*	chr1	173840000	173850000	10001	*	TRUE	TRUE	TRUE
chr1	173830000	173840000	10001	*	chr1	174230000	174240000	10001	*	TRUE	FALSE	FALSE
chr1	173850000	173860000	10001	*	chr1	174080000	174090000	10001	*	FALSE	TRUE	FALSE
chr1	174230000	174240000	10001	*	chr1	174990000	175000000	10001	*	TRUE	TRUE	TRUE
chr1	174240000	174250000	10001	*	chr1	174740000	174750000	10001	*	TRUE	TRUE	TRUE
chr1	174750000	174760000	10001	*	chr1	174990000	175000000	10001	*	TRUE	TRUE	TRUE
chr1	175000000	175010000	10001	*	chr1	175330000	175340000	10001	*	TRUE	TRUE	TRUE
chr1	175000000	175010000	10001	*	chr1	176880000	176890000	10001	*	TRUE	TRUE	TRUE
chr1	175020000	175030000	10001	*	chr1	176080000	176090000	10001	*	TRUE	FALSE	FALSE
chr1	175340000	175350000	10001	*	chr1	176010000	176020000	10001	*	FALSE	FALSE	TRUE
chr1	175340000	175350000	10001	*	chr1	176080000	176090000	10001	*	TRUE	TRUE	FALSE
chr1	176090000	176100000	10001	*	chr1	176340000	176350000	10001	*	FALSE	FALSE	TRUE
chr1	176350000	176360000	10001	*	chr1	176550000	176560000	10001	*	TRUE	FALSE	TRUE
chr1	176350000	176360000	10001	*	chr1	176880000	176890000	10001	*	TRUE	TRUE	TRUE
chr1	176550000	176560000	10001	*	chr1	176880000	176890000	10001	*	TRUE	TRUE	FALSE
chr1	176890000	176900000	10001	*	chr1	177180000	177190000	10001	*	TRUE	TRUE	TRUE
chr1	176890000	176900000	10001	*	chr1	177360000	177370000	10001	*	TRUE	TRUE	FALSE
chr1	176890000	176900000	10001	*	chr1	177940000	177950000	10001	*	TRUE	TRUE	TRUE
chr1	176890000	176900000	10001	*	chr1	178520000	178530000	10001	*	FALSE	FALSE	TRUE
chr1	177370000	177380000	10001	*	chr1	177940000	177950000	10001	*	TRUE	TRUE	TRUE
chr1	177710000	177720000	10001	*	chr1	177940000	177950000	10001	*	TRUE	FALSE	FALSE
chr1	177950000	177960000	10001	*	chr1	178290000	178300000	10001	*	TRUE	TRUE	TRUE
chr1	177950000	177960000	10001	*	chr1	178520000	178530000	10001	*	FALSE	FALSE	TRUE
chr1	177950000	177960000	10001	*	chr1	179370000	179380000	10001	*	TRUE	TRUE	FALSE
chr1	178060000	178070000	10001	*	chr1	178290000	178300000	10001	*	TRUE	FALSE	FALSE
chr1	178300000	178310000	10001	*	chr1	178520000	178530000	10001	*	TRUE	TRUE	TRUE
chr1	178520000	178530000	10001	*	chr1	179370000	179380000	10001	*	TRUE	FALSE	FALSE
chr1	178530000	178540000	10001	*	chr1	178760000	178770000	10001	*	FALSE	FALSE	TRUE
chr1	178530000	178540000	10001	*	chr1	179010000	179020000	10001	*	TRUE	TRUE	TRUE
chr1	178530000	178540000	10001	*	chr1	179830000	179840000	10001	*	FALSE	FALSE	TRUE
chr1	178770000	178780000	10001	*	chr1	179060000	179070000	10001	*	FALSE	FALSE	TRUE
chr1	179020000	179030000	10001	*	chr1	179370000	179380000	10001	*	TRUE	FALSE	FALSE
chr1	179090000	179100000	10001	*	chr1	179370000	179380000	10001	*	FALSE	TRUE	FALSE
chr1	179380000	179390000	10001	*	chr1	179650000	179660000	10001	*	TRUE	TRUE	TRUE
chr1	179380000	179390000	10001	*	chr1	179810000	179820000	10001	*	TRUE	TRUE	TRUE
chr1	179380000	179390000	10001	*	chr1	180490000	180500000	10001	*	TRUE	TRUE	FALSE
chr1	179640000	179650000	10001	*	chr1	179830000	179840000	10001	*	FALSE	FALSE	TRUE
chr1	179820000	179830000	10001	*	chr1	180180000	180190000	10001	*	TRUE	TRUE	TRUE
chr1	179820000	179830000	10001	*	chr1	180490000	180500000	10001	*	TRUE	TRUE	TRUE
chr1	179840000	179850000	10001	*	chr1	180040000	180050000	10001	*	FALSE	FALSE	TRUE
chr1	180190000	180200000	10001	*	chr1	180490000	180500000	10001	*	TRUE	TRUE	TRUE
chr1	180260000	180270000	10001	*	chr1	180480000	180490000	10001	*	FALSE	FALSE	TRUE
chr1	180500000	180510000	10001	*	chr1	180870000	180880000	10001	*	TRUE	TRUE	TRUE
chr1	180500000	180510000	10001	*	chr1	181170000	181180000	10001	*	FALSE	TRUE	TRUE
chr1	180500000	180510000	10001	*	chr1	182830000	182840000	10001	*	TRUE	FALSE	TRUE
chr1	180640000	180650000	10001	*	chr1	180870000	180880000	10001	*	TRUE	TRUE	FALSE
chr1	180880000	180890000	10001	*	chr1	181170000	181180000	10001	*	TRUE	TRUE	TRUE
chr1	181180000	181190000	10001	*	chr1	181430000	181440000	10001	*	TRUE	TRUE	TRUE
chr1	181180000	181190000	10001	*	chr1	182020000	182030000	10001	*	FALSE	TRUE	FALSE
chr1	181180000	181190000	10001	*	chr1	182830000	182840000	10001	*	FALSE	TRUE	FALSE
chr1	181440000	181450000	10001	*	chr1	182050000	182060000	10001	*	TRUE	TRUE	TRUE
chr1	181440000	181450000	10001	*	chr1	182830000	182840000	10001	*	TRUE	FALSE	FALSE
chr1	181500000	181510000	10001	*	chr1	181920000	181930000	10001	*	FALSE	FALSE	TRUE
chr1	182030000	182040000	10001	*	chr1	182400000	182410000	10001	*	FALSE	TRUE	FALSE
chr1	182060000	182070000	10001	*	chr1	182830000	182840000	10001	*	TRUE	TRUE	TRUE
chr1	182090000	182100000	10001	*	chr1	182400000	182410000	10001	*	FALSE	FALSE	TRUE
chr1	182410000	182420000	10001	*	chr1	182830000	182840000	10001	*	FALSE	TRUE	TRUE
chr1	182840000	182850000	10001	*	chr1	183280000	183290000	10001	*	TRUE	TRUE	TRUE
chr1	182840000	182850000	10001	*	chr1	183630000	183640000	10001	*	TRUE	TRUE	TRUE
chr1	182960000	182970000	10001	*	chr1	183280000	183290000	10001	*	TRUE	TRUE	TRUE
chr1	183250000	183260000	10001	*	chr1	183470000	183480000	10001	*	FALSE	FALSE	TRUE
chr1	183290000	183300000	10001	*	chr1	183630000	183640000	10001	*	TRUE	TRUE	TRUE
chr1	183640000	183650000	10001	*	chr1	183920000	183930000	10001	*	TRUE	TRUE	TRUE
chr1	183640000	183650000	10001	*	chr1	184740000	184750000	10001	*	TRUE	TRUE	TRUE
chr1	184040000	184050000	10001	*	chr1	184660000	184670000	10001	*	FALSE	FALSE	TRUE
chr1	184050000	184060000	10001	*	chr1	184740000	184750000	10001	*	TRUE	TRUE	TRUE
chr1	184240000	184250000	10001	*	chr1	184670000	184680000	10001	*	TRUE	FALSE	FALSE
chr1	184320000	184330000	10001	*	chr1	184700000	184710000	10001	*	FALSE	TRUE	FALSE
chr1	184740000	184750000	10001	*	chr1	186360000	186370000	10001	*	TRUE	FALSE	TRUE
chr1	184750000	184760000	10001	*	chr1	184990000	185000000	10001	*	FALSE	TRUE	FALSE
chr1	184750000	184760000	10001	*	chr1	185170000	185180000	10001	*	TRUE	TRUE	TRUE
chr1	184750000	184760000	10001	*	chr1	185690000	185700000	10001	*	TRUE	TRUE	TRUE
chr1	185170000	185180000	10001	*	chr1	185690000	185700000	10001	*	TRUE	FALSE	TRUE
chr1	185300000	185310000	10001	*	chr1	185680000	185690000	10001	*	FALSE	TRUE	FALSE
chr1	185690000	185700000	10001	*	chr1	186290000	186300000	10001	*	TRUE	FALSE	FALSE
chr1	185700000	185710000	10001	*	chr1	186360000	186370000	10001	*	TRUE	TRUE	TRUE
chr1	185710000	185720000	10001	*	chr1	186230000	186240000	10001	*	FALSE	TRUE	TRUE
chr1	185820000	185830000	10001	*	chr1	186220000	186230000	10001	*	FALSE	TRUE	FALSE
chr1	186370000	186380000	10001	*	chr1	186600000	186610000	10001	*	FALSE	FALSE	TRUE
chr1	186370000	186380000	10001	*	chr1	187030000	187040000	10001	*	TRUE	TRUE	TRUE
chr1	186480000	186490000	10001	*	chr1	186690000	186700000	10001	*	TRUE	FALSE	FALSE
chr1	186610000	186620000	10001	*	chr1	186990000	187000000	10001	*	FALSE	TRUE	TRUE
chr1	186700000	186710000	10001	*	chr1	186980000	186990000	10001	*	TRUE	FALSE	FALSE
chr1	187040000	187050000	10001	*	chr1	187250000	187260000	10001	*	TRUE	FALSE	TRUE
chr1	187040000	187050000	10001	*	chr1	188760000	188770000	10001	*	TRUE	FALSE	TRUE
chr1	188770000	188780000	10001	*	chr1	190440000	190450000	10001	*	TRUE	FALSE	TRUE
chr1	190450000	190460000	10001	*	chr1	192450000	192460000	10001	*	TRUE	TRUE	TRUE
chr1	192460000	192470000	10001	*	chr1	192800000	192810000	10001	*	TRUE	TRUE	TRUE
chr1	192460000	192470000	10001	*	chr1	193120000	193130000	10001	*	TRUE	TRUE	TRUE
chr1	192810000	192820000	10001	*	chr1	193030000	193040000	10001	*	TRUE	TRUE	TRUE
chr1	193130000	193140000	10001	*	chr1	193360000	193370000	10001	*	TRUE	TRUE	TRUE
chr1	193130000	193140000	10001	*	chr1	194300000	194310000	10001	*	TRUE	TRUE	TRUE
chr1	193360000	193370000	10001	*	chr1	194290000	194300000	10001	*	TRUE	TRUE	FALSE
chr1	194300000	194310000	10001	*	chr1	196300000	196310000	10001	*	TRUE	FALSE	FALSE
chr1	194310000	194320000	10001	*	chr1	196130000	196140000	10001	*	FALSE	FALSE	TRUE
chr1	196120000	196130000	10001	*	chr1	196310000	196320000	10001	*	FALSE	TRUE	FALSE
chr1	196140000	196150000	10001	*	chr1	196670000	196680000	10001	*	FALSE	FALSE	TRUE
chr1	196140000	196150000	10001	*	chr1	197380000	197390000	10001	*	FALSE	FALSE	TRUE
chr1	196310000	196320000	10001	*	chr1	196610000	196620000	10001	*	TRUE	FALSE	FALSE
chr1	196310000	196320000	10001	*	chr1	197370000	197380000	10001	*	TRUE	FALSE	FALSE
chr1	196320000	196330000	10001	*	chr1	196670000	196680000	10001	*	TRUE	TRUE	TRUE
chr1	196320000	196330000	10001	*	chr1	196740000	196750000	10001	*	FALSE	TRUE	FALSE
chr1	196680000	196690000	10001	*	chr1	197380000	197390000	10001	*	TRUE	FALSE	TRUE
chr1	197150000	197160000	10001	*	chr1	197510000	197520000	10001	*	FALSE	TRUE	FALSE
chr1	197160000	197170000	10001	*	chr1	197370000	197380000	10001	*	TRUE	TRUE	TRUE
chr1	197390000	197400000	10001	*	chr1	197890000	197900000	10001	*	TRUE	FALSE	TRUE
chr1	197390000	197400000	10001	*	chr1	198700000	198710000	10001	*	TRUE	FALSE	TRUE
chr1	197520000	197530000	10001	*	chr1	197930000	197940000	10001	*	FALSE	TRUE	FALSE
chr1	197520000	197530000	10001	*	chr1	198730000	198740000	10001	*	FALSE	TRUE	FALSE
chr1	197620000	197630000	10001	*	chr1	197880000	197890000	10001	*	TRUE	TRUE	TRUE
chr1	197940000	197950000	10001	*	chr1	198320000	198330000	10001	*	FALSE	TRUE	FALSE
chr1	197940000	197950000	10001	*	chr1	198680000	198690000	10001	*	FALSE	TRUE	FALSE
chr1	198080000	198090000	10001	*	chr1	198470000	198480000	10001	*	FALSE	FALSE	TRUE
chr1	198080000	198090000	10001	*	chr1	198700000	198710000	10001	*	FALSE	FALSE	TRUE
chr1	198160000	198170000	10001	*	chr1	198460000	198470000	10001	*	TRUE	FALSE	FALSE
chr1	198160000	198170000	10001	*	chr1	198700000	198710000	10001	*	TRUE	FALSE	FALSE
chr1	198470000	198480000	10001	*	chr1	198680000	198690000	10001	*	TRUE	TRUE	TRUE
chr1	198730000	198740000	10001	*	chr1	199550000	199560000	10001	*	TRUE	TRUE	FALSE
chr1	198740000	198750000	10001	*	chr1	198940000	198950000	10001	*	FALSE	TRUE	FALSE
chr1	198770000	198780000	10001	*	chr1	199120000	199130000	10001	*	FALSE	FALSE	TRUE
chr1	199130000	199140000	10001	*	chr1	199550000	199560000	10001	*	TRUE	TRUE	FALSE
chr1	199560000	199570000	10001	*	chr1	200520000	200530000	10001	*	TRUE	FALSE	FALSE
chr1	200290000	200300000	10001	*	chr1	200490000	200500000	10001	*	TRUE	FALSE	TRUE
chr1	200520000	200530000	10001	*	chr1	201110000	201120000	10001	*	FALSE	FALSE	TRUE
chr1	200530000	200540000	10001	*	chr1	200850000	200860000	10001	*	TRUE	FALSE	TRUE
chr1	200530000	200540000	10001	*	chr1	201240000	201250000	10001	*	TRUE	FALSE	FALSE
chr1	200530000	200540000	10001	*	chr1	202140000	202150000	10001	*	TRUE	FALSE	FALSE
chr1	200860000	200870000	10001	*	chr1	201110000	201120000	10001	*	FALSE	FALSE	TRUE
chr1	200860000	200870000	10001	*	chr1	201240000	201250000	10001	*	TRUE	FALSE	FALSE
chr1	201120000	201130000	10001	*	chr1	201370000	201380000	10001	*	FALSE	FALSE	TRUE
chr1	201120000	201130000	10001	*	chr1	201520000	201530000	10001	*	FALSE	FALSE	TRUE
chr1	201120000	201130000	10001	*	chr1	202130000	202140000	10001	*	FALSE	FALSE	TRUE
chr1	201410000	201420000	10001	*	chr1	201810000	201820000	10001	*	TRUE	TRUE	FALSE
chr1	201410000	201420000	10001	*	chr1	202140000	202150000	10001	*	TRUE	TRUE	FALSE
chr1	201530000	201540000	10001	*	chr1	201820000	201830000	10001	*	FALSE	TRUE	TRUE
chr1	201830000	201840000	10001	*	chr1	202140000	202150000	10001	*	TRUE	FALSE	FALSE
chr1	201890000	201900000	10001	*	chr1	202140000	202150000	10001	*	FALSE	TRUE	FALSE
chr1	202150000	202160000	10001	*	chr1	202340000	202350000	10001	*	TRUE	TRUE	FALSE
chr1	202150000	202160000	10001	*	chr1	203010000	203020000	10001	*	TRUE	TRUE	TRUE
chr1	202350000	202360000	10001	*	chr1	202720000	202730000	10001	*	TRUE	TRUE	TRUE
chr1	202470000	202480000	10001	*	chr1	202720000	202730000	10001	*	TRUE	TRUE	TRUE
chr1	202730000	202740000	10001	*	chr1	203010000	203020000	10001	*	TRUE	TRUE	TRUE
chr1	203010000	203020000	10001	*	chr1	203790000	203800000	10001	*	FALSE	TRUE	FALSE
chr1	203020000	203030000	10001	*	chr1	203270000	203280000	10001	*	TRUE	TRUE	TRUE
chr1	203020000	203030000	10001	*	chr1	203710000	203720000	10001	*	FALSE	FALSE	TRUE
chr1	203020000	203030000	10001	*	chr1	203850000	203860000	10001	*	TRUE	FALSE	FALSE
chr1	203020000	203030000	10001	*	chr1	204500000	204510000	10001	*	FALSE	TRUE	TRUE
chr1	203280000	203290000	10001	*	chr1	203490000	203500000	10001	*	TRUE	FALSE	TRUE
chr1	203500000	203510000	10001	*	chr1	203710000	203720000	10001	*	TRUE	FALSE	TRUE
chr1	203500000	203510000	10001	*	chr1	203790000	203800000	10001	*	FALSE	TRUE	FALSE
chr1	203500000	203510000	10001	*	chr1	203850000	203860000	10001	*	TRUE	FALSE	FALSE
chr1	203800000	203810000	10001	*	chr1	204130000	204140000	10001	*	FALSE	TRUE	TRUE
chr1	203800000	203810000	10001	*	chr1	204500000	204510000	10001	*	FALSE	TRUE	TRUE
chr1	204140000	204150000	10001	*	chr1	204500000	204510000	10001	*	FALSE	TRUE	TRUE
chr1	204510000	204520000	10001	*	chr1	204950000	204960000	10001	*	FALSE	TRUE	TRUE
chr1	204510000	204520000	10001	*	chr1	205260000	205270000	10001	*	FALSE	TRUE	FALSE
chr1	204510000	204520000	10001	*	chr1	205320000	205330000	10001	*	FALSE	FALSE	TRUE
chr1	204960000	204970000	10001	*	chr1	205270000	205280000	10001	*	FALSE	FALSE	TRUE
chr1	205330000	205340000	10001	*	chr1	205530000	205540000	10001	*	FALSE	FALSE	TRUE
chr1	205330000	205340000	10001	*	chr1	205670000	205680000	10001	*	FALSE	FALSE	TRUE
chr1	205530000	205540000	10001	*	chr1	205750000	205760000	10001	*	FALSE	TRUE	FALSE
chr1	205760000	205770000	10001	*	chr1	206030000	206040000	10001	*	FALSE	FALSE	TRUE
chr1	206410000	206420000	10001	*	chr1	206930000	206940000	10001	*	FALSE	TRUE	FALSE
chr1	206420000	206430000	10001	*	chr1	206730000	206740000	10001	*	TRUE	FALSE	FALSE
chr1	206440000	206450000	10001	*	chr1	207810000	207820000	10001	*	TRUE	FALSE	TRUE
chr1	206450000	206460000	10001	*	chr1	207040000	207050000	10001	*	FALSE	FALSE	TRUE
chr1	206600000	206610000	10001	*	chr1	206930000	206940000	10001	*	FALSE	TRUE	FALSE
chr1	206730000	206740000	10001	*	chr1	207040000	207050000	10001	*	FALSE	FALSE	TRUE
chr1	207060000	207070000	10001	*	chr1	207400000	207410000	10001	*	TRUE	FALSE	TRUE
chr1	207810000	207820000	10001	*	chr1	208000000	208010000	10001	*	TRUE	TRUE	FALSE
chr1	207810000	207820000	10001	*	chr1	208240000	208250000	10001	*	TRUE	FALSE	FALSE
chr1	207810000	207820000	10001	*	chr1	209560000	209570000	10001	*	TRUE	FALSE	FALSE
chr1	207820000	207830000	10001	*	chr1	209200000	209210000	10001	*	FALSE	FALSE	TRUE
chr1	207820000	207830000	10001	*	chr1	209830000	209840000	10001	*	FALSE	FALSE	TRUE
chr1	208010000	208020000	10001	*	chr1	208240000	208250000	10001	*	TRUE	TRUE	TRUE
chr1	208250000	208260000	10001	*	chr1	208640000	208650000	10001	*	TRUE	TRUE	FALSE
chr1	208250000	208260000	10001	*	chr1	209200000	209210000	10001	*	FALSE	FALSE	TRUE
chr1	208250000	208260000	10001	*	chr1	209560000	209570000	10001	*	TRUE	TRUE	FALSE
chr1	208640000	208650000	10001	*	chr1	209180000	209190000	10001	*	FALSE	TRUE	FALSE
chr1	208650000	208660000	10001	*	chr1	209040000	209050000	10001	*	TRUE	FALSE	FALSE
chr1	209200000	209210000	10001	*	chr1	209560000	209570000	10001	*	TRUE	TRUE	FALSE
chr1	209550000	209560000	10001	*	chr1	209750000	209760000	10001	*	FALSE	FALSE	TRUE
chr1	209570000	209580000	10001	*	chr1	209830000	209840000	10001	*	TRUE	TRUE	TRUE
chr1	209570000	209580000	10001	*	chr1	211250000	211260000	10001	*	FALSE	TRUE	FALSE
chr1	209570000	209580000	10001	*	chr1	211660000	211670000	10001	*	TRUE	FALSE	FALSE
chr1	209840000	209850000	10001	*	chr1	210320000	210330000	10001	*	FALSE	FALSE	TRUE
chr1	209840000	209850000	10001	*	chr1	211660000	211670000	10001	*	FALSE	FALSE	TRUE
chr1	209990000	210000000	10001	*	chr1	210330000	210340000	10001	*	TRUE	FALSE	FALSE
chr1	210110000	210120000	10001	*	chr1	210330000	210340000	10001	*	TRUE	TRUE	TRUE
chr1	210330000	210340000	10001	*	chr1	211660000	211670000	10001	*	FALSE	FALSE	TRUE
chr1	210410000	210420000	10001	*	chr1	211140000	211150000	10001	*	FALSE	TRUE	TRUE
chr1	210410000	210420000	10001	*	chr1	211250000	211260000	10001	*	TRUE	TRUE	FALSE
chr1	210410000	210420000	10001	*	chr1	211660000	211670000	10001	*	TRUE	FALSE	FALSE
chr1	211260000	211270000	10001	*	chr1	211660000	211670000	10001	*	TRUE	TRUE	TRUE
chr1	211260000	211270000	10001	*	chr1	213010000	213020000	10001	*	FALSE	TRUE	FALSE
chr1	211670000	211680000	10001	*	chr1	211950000	211960000	10001	*	TRUE	TRUE	FALSE
chr1	211670000	211680000	10001	*	chr1	212030000	212040000	10001	*	TRUE	TRUE	TRUE
chr1	211670000	211680000	10001	*	chr1	212450000	212460000	10001	*	FALSE	FALSE	TRUE
chr1	211670000	211680000	10001	*	chr1	213010000	213020000	10001	*	TRUE	FALSE	TRUE
chr1	212040000	212050000	10001	*	chr1	212370000	212380000	10001	*	TRUE	FALSE	FALSE
chr1	212050000	212060000	10001	*	chr1	212290000	212300000	10001	*	TRUE	TRUE	FALSE
chr1	212050000	212060000	10001	*	chr1	212460000	212470000	10001	*	FALSE	TRUE	TRUE
chr1	212460000	212470000	10001	*	chr1	213010000	213020000	10001	*	TRUE	TRUE	TRUE
chr1	212470000	212480000	10001	*	chr1	212790000	212800000	10001	*	TRUE	TRUE	FALSE
chr1	212800000	212810000	10001	*	chr1	213010000	213020000	10001	*	TRUE	TRUE	TRUE
chr1	213020000	213030000	10001	*	chr1	214130000	214140000	10001	*	FALSE	TRUE	FALSE
chr1	213020000	213030000	10001	*	chr1	214320000	214330000	10001	*	TRUE	TRUE	TRUE
chr1	214330000	214340000	10001	*	chr1	214610000	214620000	10001	*	TRUE	TRUE	TRUE
chr1	214330000	214340000	10001	*	chr1	215630000	215640000	10001	*	TRUE	TRUE	TRUE
chr1	214620000	214630000	10001	*	chr1	215150000	215160000	10001	*	TRUE	FALSE	TRUE
chr1	214620000	214630000	10001	*	chr1	215630000	215640000	10001	*	TRUE	TRUE	TRUE
chr1	214680000	214690000	10001	*	chr1	215170000	215180000	10001	*	FALSE	TRUE	FALSE
chr1	215160000	215170000	10001	*	chr1	215530000	215540000	10001	*	TRUE	TRUE	TRUE
chr1	215640000	215650000	10001	*	chr1	218270000	218280000	10001	*	TRUE	TRUE	TRUE
chr1	216680000	216690000	10001	*	chr1	217340000	217350000	10001	*	TRUE	FALSE	FALSE
chr1	216700000	216710000	10001	*	chr1	218270000	218280000	10001	*	TRUE	TRUE	FALSE
chr1	216710000	216720000	10001	*	chr1	217380000	217390000	10001	*	FALSE	TRUE	FALSE
chr1	217370000	217380000	10001	*	chr1	217670000	217680000	10001	*	TRUE	TRUE	FALSE
chr1	218280000	218290000	10001	*	chr1	219820000	219830000	10001	*	TRUE	TRUE	TRUE
chr1	218340000	218350000	10001	*	chr1	218710000	218720000	10001	*	FALSE	TRUE	TRUE
chr1	218340000	218350000	10001	*	chr1	219070000	219080000	10001	*	TRUE	FALSE	TRUE
chr1	218340000	218350000	10001	*	chr1	219190000	219200000	10001	*	FALSE	TRUE	FALSE
chr1	218720000	218730000	10001	*	chr1	219060000	219070000	10001	*	TRUE	TRUE	TRUE
chr1	219830000	219840000	10001	*	chr1	220160000	220170000	10001	*	TRUE	TRUE	TRUE
chr1	219830000	219840000	10001	*	chr1	220800000	220810000	10001	*	TRUE	TRUE	TRUE
chr1	219970000	219980000	10001	*	chr1	220160000	220170000	10001	*	FALSE	TRUE	FALSE
chr1	220280000	220290000	10001	*	chr1	220800000	220810000	10001	*	TRUE	TRUE	TRUE
chr1	220290000	220300000	10001	*	chr1	220650000	220660000	10001	*	TRUE	FALSE	FALSE
chr1	220810000	220820000	10001	*	chr1	221210000	221220000	10001	*	FALSE	TRUE	TRUE
chr1	220810000	220820000	10001	*	chr1	221440000	221450000	10001	*	TRUE	TRUE	TRUE
chr1	221220000	221230000	10001	*	chr1	221440000	221450000	10001	*	TRUE	TRUE	TRUE
chr1	221450000	221460000	10001	*	chr1	222010000	222020000	10001	*	TRUE	FALSE	TRUE
chr1	222720000	222730000	10001	*	chr1	223090000	223100000	10001	*	TRUE	TRUE	TRUE
chr1	223100000	223110000	10001	*	chr1	223690000	223700000	10001	*	TRUE	FALSE	TRUE
chr1	224120000	224130000	10001	*	chr1	224340000	224350000	10001	*	TRUE	TRUE	TRUE
chr1	224490000	224500000	10001	*	chr1	224930000	224940000	10001	*	TRUE	TRUE	TRUE
chr1	224660000	224670000	10001	*	chr1	224930000	224940000	10001	*	FALSE	TRUE	TRUE
chr1	224940000	224950000	10001	*	chr1	225450000	225460000	10001	*	TRUE	TRUE	TRUE
chr1	225460000	225470000	10001	*	chr1	225650000	225660000	10001	*	TRUE	TRUE	FALSE
chr1	225460000	225470000	10001	*	chr1	225770000	225780000	10001	*	TRUE	TRUE	TRUE
chr1	225460000	225470000	10001	*	chr1	225990000	226000000	10001	*	TRUE	TRUE	TRUE
chr1	225780000	225790000	10001	*	chr1	225990000	226000000	10001	*	TRUE	TRUE	TRUE
chr1	226000000	226010000	10001	*	chr1	226400000	226410000	10001	*	TRUE	TRUE	TRUE
chr1	226000000	226010000	10001	*	chr1	227440000	227450000	10001	*	TRUE	TRUE	TRUE
chr1	226130000	226140000	10001	*	chr1	226390000	226400000	10001	*	TRUE	FALSE	TRUE
chr1	226410000	226420000	10001	*	chr1	226620000	226630000	10001	*	TRUE	TRUE	FALSE
chr1	226620000	226630000	10001	*	chr1	226830000	226840000	10001	*	FALSE	FALSE	TRUE
chr1	226630000	226640000	10001	*	chr1	226980000	226990000	10001	*	TRUE	FALSE	FALSE
chr1	226630000	226640000	10001	*	chr1	227440000	227450000	10001	*	TRUE	TRUE	TRUE
chr1	226990000	227000000	10001	*	chr1	227440000	227450000	10001	*	TRUE	FALSE	TRUE
chr1	227450000	227460000	10001	*	chr1	227730000	227740000	10001	*	TRUE	TRUE	TRUE
chr1	228220000	228230000	10001	*	chr1	228430000	228440000	10001	*	TRUE	FALSE	TRUE
chr1	229240000	229250000	10001	*	chr1	229520000	229530000	10001	*	TRUE	TRUE	TRUE
chr1	229240000	229250000	10001	*	chr1	229620000	229630000	10001	*	TRUE	FALSE	FALSE
chr1	229560000	229570000	10001	*	chr1	230310000	230320000	10001	*	FALSE	TRUE	TRUE
chr1	229560000	229570000	10001	*	chr1	231230000	231240000	10001	*	FALSE	TRUE	FALSE
chr1	229630000	229640000	10001	*	chr1	231600000	231610000	10001	*	TRUE	FALSE	FALSE
chr1	229640000	229650000	10001	*	chr1	230060000	230070000	10001	*	TRUE	FALSE	TRUE
chr1	229650000	229660000	10001	*	chr1	230310000	230320000	10001	*	TRUE	TRUE	TRUE
chr1	230070000	230080000	10001	*	chr1	230310000	230320000	10001	*	TRUE	FALSE	TRUE
chr1	230320000	230330000	10001	*	chr1	230590000	230600000	10001	*	TRUE	TRUE	TRUE
chr1	230320000	230330000	10001	*	chr1	231210000	231220000	10001	*	FALSE	FALSE	TRUE
chr1	230320000	230330000	10001	*	chr1	231600000	231610000	10001	*	FALSE	FALSE	TRUE
chr1	230600000	230610000	10001	*	chr1	230790000	230800000	10001	*	TRUE	FALSE	FALSE
chr1	230600000	230610000	10001	*	chr1	231230000	231240000	10001	*	FALSE	TRUE	FALSE
chr1	230800000	230810000	10001	*	chr1	231220000	231230000	10001	*	TRUE	FALSE	TRUE
chr1	230930000	230940000	10001	*	chr1	231230000	231240000	10001	*	TRUE	TRUE	FALSE
chr1	231240000	231250000	10001	*	chr1	231610000	231620000	10001	*	TRUE	TRUE	FALSE
chr1	231240000	231250000	10001	*	chr1	233290000	233300000	10001	*	FALSE	TRUE	FALSE
chr1	231340000	231350000	10001	*	chr1	231600000	231610000	10001	*	TRUE	TRUE	TRUE
chr1	231610000	231620000	10001	*	chr1	231820000	231830000	10001	*	FALSE	FALSE	TRUE
chr1	231610000	231620000	10001	*	chr1	232630000	232640000	10001	*	TRUE	TRUE	TRUE
chr1	231610000	231620000	10001	*	chr1	233280000	233290000	10001	*	TRUE	FALSE	TRUE
chr1	231840000	231850000	10001	*	chr1	232630000	232640000	10001	*	TRUE	FALSE	TRUE
chr1	232640000	232650000	10001	*	chr1	232950000	232960000	10001	*	TRUE	TRUE	TRUE
chr1	232640000	232650000	10001	*	chr1	233280000	233290000	10001	*	TRUE	TRUE	TRUE
chr1	232960000	232970000	10001	*	chr1	233280000	233290000	10001	*	TRUE	TRUE	TRUE
chr1	233290000	233300000	10001	*	chr1	234070000	234080000	10001	*	TRUE	TRUE	TRUE
chr1	233290000	233300000	10001	*	chr1	234470000	234480000	10001	*	TRUE	TRUE	TRUE
chr1	233450000	233460000	10001	*	chr1	233790000	233800000	10001	*	TRUE	TRUE	TRUE
chr1	233800000	233810000	10001	*	chr1	234070000	234080000	10001	*	TRUE	TRUE	TRUE
chr1	234080000	234090000	10001	*	chr1	234370000	234380000	10001	*	TRUE	TRUE	TRUE
chr1	234080000	234090000	10001	*	chr1	234470000	234480000	10001	*	TRUE	TRUE	TRUE
chr1	234480000	234490000	10001	*	chr1	234790000	234800000	10001	*	TRUE	TRUE	TRUE
chr1	234480000	234490000	10001	*	chr1	235080000	235090000	10001	*	FALSE	FALSE	TRUE
chr1	234480000	234490000	10001	*	chr1	236090000	236100000	10001	*	TRUE	TRUE	FALSE
chr1	234800000	234810000	10001	*	chr1	235090000	235100000	10001	*	TRUE	TRUE	TRUE
chr1	235090000	235100000	10001	*	chr1	236090000	236100000	10001	*	FALSE	FALSE	TRUE
chr1	235100000	235110000	10001	*	chr1	235420000	235430000	10001	*	FALSE	TRUE	FALSE
chr1	235100000	235110000	10001	*	chr1	235490000	235500000	10001	*	TRUE	TRUE	TRUE
chr1	235240000	235250000	10001	*	chr1	235500000	235510000	10001	*	TRUE	FALSE	FALSE
chr1	235500000	235510000	10001	*	chr1	236090000	236100000	10001	*	TRUE	TRUE	TRUE
chr1	235870000	235880000	10001	*	chr1	236090000	236100000	10001	*	TRUE	TRUE	TRUE
chr1	236100000	236110000	10001	*	chr1	236540000	236550000	10001	*	TRUE	TRUE	TRUE
chr1	236100000	236110000	10001	*	chr1	237800000	237810000	10001	*	TRUE	TRUE	TRUE
chr1	236550000	236560000	10001	*	chr1	237800000	237810000	10001	*	TRUE	FALSE	TRUE
chr1	236600000	236610000	10001	*	chr1	236790000	236800000	10001	*	FALSE	TRUE	FALSE
chr1	236600000	236610000	10001	*	chr1	236900000	236910000	10001	*	FALSE	TRUE	FALSE
chr1	236610000	236620000	10001	*	chr1	237390000	237400000	10001	*	TRUE	FALSE	TRUE
chr1	236910000	236920000	10001	*	chr1	237800000	237810000	10001	*	FALSE	TRUE	FALSE
chr1	237570000	237580000	10001	*	chr1	237800000	237810000	10001	*	TRUE	TRUE	TRUE
chr1	237800000	237810000	10001	*	chr1	238950000	238960000	10001	*	FALSE	FALSE	TRUE
chr1	237810000	237820000	10001	*	chr1	239990000	240000000	10001	*	TRUE	TRUE	TRUE
chr1	237870000	237880000	10001	*	chr1	238230000	238240000	10001	*	TRUE	TRUE	TRUE
chr1	237870000	237880000	10001	*	chr1	238950000	238960000	10001	*	TRUE	TRUE	FALSE
chr1	238240000	238250000	10001	*	chr1	238950000	238960000	10001	*	TRUE	TRUE	TRUE
chr1	238960000	238970000	10001	*	chr1	239390000	239400000	10001	*	FALSE	FALSE	TRUE
chr1	239380000	239390000	10001	*	chr1	239990000	240000000	10001	*	TRUE	FALSE	FALSE
chr1	239390000	239400000	10001	*	chr1	239900000	239910000	10001	*	FALSE	TRUE	TRUE
chr1	240000000	240010000	10001	*	chr1	240700000	240710000	10001	*	TRUE	TRUE	TRUE
chr1	240000000	240010000	10001	*	chr1	241510000	241520000	10001	*	TRUE	TRUE	TRUE
chr1	240190000	240200000	10001	*	chr1	240700000	240710000	10001	*	TRUE	TRUE	TRUE
chr1	240710000	240720000	10001	*	chr1	240950000	240960000	10001	*	FALSE	TRUE	FALSE
chr1	240710000	240720000	10001	*	chr1	241510000	241520000	10001	*	TRUE	TRUE	FALSE
chr1	240960000	240970000	10001	*	chr1	241510000	241520000	10001	*	TRUE	TRUE	TRUE
chr1	241520000	241530000	10001	*	chr1	241840000	241850000	10001	*	TRUE	TRUE	TRUE
chr1	241520000	241530000	10001	*	chr1	242020000	242030000	10001	*	FALSE	FALSE	TRUE
chr1	241630000	241640000	10001	*	chr1	241850000	241860000	10001	*	TRUE	TRUE	FALSE
chr1	242020000	242030000	10001	*	chr1	242430000	242440000	10001	*	TRUE	FALSE	TRUE
chr1	243340000	243350000	10001	*	chr1	244270000	244280000	10001	*	TRUE	TRUE	TRUE
chr1	243340000	243350000	10001	*	chr1	244440000	244450000	10001	*	FALSE	TRUE	FALSE
chr1	243340000	243350000	10001	*	chr1	244590000	244600000	10001	*	FALSE	FALSE	TRUE
chr1	243860000	243870000	10001	*	chr1	244270000	244280000	10001	*	TRUE	FALSE	FALSE
chr1	244280000	244290000	10001	*	chr1	244590000	244600000	10001	*	FALSE	FALSE	TRUE
chr1	244430000	244440000	10001	*	chr1	244800000	244810000	10001	*	TRUE	FALSE	FALSE
chr1	244430000	244440000	10001	*	chr1	245050000	245060000	10001	*	TRUE	FALSE	FALSE
chr1	244600000	244610000	10001	*	chr1	245050000	245060000	10001	*	FALSE	FALSE	TRUE
chr1	244600000	244610000	10001	*	chr1	246460000	246470000	10001	*	FALSE	FALSE	TRUE
chr1	244810000	244820000	10001	*	chr1	245050000	245060000	10001	*	TRUE	FALSE	FALSE
chr1	245060000	245070000	10001	*	chr1	246460000	246470000	10001	*	FALSE	FALSE	TRUE
chr1	246470000	246480000	10001	*	chr1	246760000	246770000	10001	*	FALSE	FALSE	TRUE
chr2	230000	240000	10001	*	chr2	520000	530000	10001	*	FALSE	TRUE	FALSE
chr2	230000	240000	10001	*	chr2	670000	680000	10001	*	FALSE	TRUE	FALSE
chr2	300000	310000	10001	*	chr2	500000	510000	10001	*	TRUE	FALSE	FALSE
chr2	300000	310000	10001	*	chr2	660000	670000	10001	*	TRUE	FALSE	TRUE
chr2	680000	690000	10001	*	chr2	1540000	1550000	10001	*	TRUE	TRUE	TRUE
chr2	680000	690000	10001	*	chr2	1820000	1830000	10001	*	TRUE	TRUE	TRUE
chr2	1160000	1170000	10001	*	chr2	1530000	1540000	10001	*	TRUE	TRUE	FALSE
chr2	1550000	1560000	10001	*	chr2	1750000	1760000	10001	*	TRUE	TRUE	TRUE
chr2	1550000	1560000	10001	*	chr2	1820000	1830000	10001	*	FALSE	TRUE	FALSE
chr2	1830000	1840000	10001	*	chr2	3650000	3660000	10001	*	TRUE	TRUE	TRUE
chr2	3330000	3340000	10001	*	chr2	3650000	3660000	10001	*	TRUE	FALSE	TRUE
chr2	3380000	3390000	10001	*	chr2	3580000	3590000	10001	*	FALSE	TRUE	FALSE
chr2	3380000	3390000	10001	*	chr2	3680000	3690000	10001	*	FALSE	TRUE	FALSE
chr2	3660000	3670000	10001	*	chr2	3930000	3940000	10001	*	TRUE	TRUE	TRUE
chr2	6340000	6350000	10001	*	chr2	6580000	6590000	10001	*	FALSE	TRUE	FALSE
chr2	6350000	6360000	10001	*	chr2	6770000	6780000	10001	*	TRUE	TRUE	TRUE
chr2	6590000	6600000	10001	*	chr2	6780000	6790000	10001	*	FALSE	TRUE	FALSE
chr2	6790000	6800000	10001	*	chr2	7080000	7090000	10001	*	FALSE	TRUE	TRUE
chr2	6870000	6880000	10001	*	chr2	8690000	8700000	10001	*	TRUE	FALSE	FALSE
chr2	6870000	6880000	10001	*	chr2	9130000	9140000	10001	*	TRUE	FALSE	FALSE
chr2	6890000	6900000	10001	*	chr2	7080000	7090000	10001	*	TRUE	TRUE	TRUE
chr2	7090000	7100000	10001	*	chr2	7400000	7410000	10001	*	TRUE	TRUE	TRUE
chr2	7090000	7100000	10001	*	chr2	8690000	8700000	10001	*	FALSE	TRUE	TRUE
chr2	7090000	7100000	10001	*	chr2	9130000	9140000	10001	*	FALSE	TRUE	TRUE
chr2	7410000	7420000	10001	*	chr2	8680000	8690000	10001	*	TRUE	TRUE	TRUE
chr2	8700000	8710000	10001	*	chr2	9130000	9140000	10001	*	TRUE	TRUE	TRUE
chr2	8840000	8850000	10001	*	chr2	9130000	9140000	10001	*	TRUE	TRUE	TRUE
chr2	9140000	9150000	10001	*	chr2	9340000	9350000	10001	*	FALSE	TRUE	TRUE
chr2	9140000	9150000	10001	*	chr2	9430000	9440000	10001	*	TRUE	TRUE	TRUE
chr2	9140000	9150000	10001	*	chr2	9770000	9780000	10001	*	TRUE	FALSE	FALSE
chr2	9140000	9150000	10001	*	chr2	10680000	10690000	10001	*	TRUE	TRUE	TRUE
chr2	9440000	9450000	10001	*	chr2	9760000	9770000	10001	*	TRUE	TRUE	TRUE
chr2	9770000	9780000	10001	*	chr2	9970000	9980000	10001	*	FALSE	FALSE	TRUE
chr2	9770000	9780000	10001	*	chr2	10050000	10060000	10001	*	TRUE	TRUE	TRUE
chr2	10130000	10140000	10001	*	chr2	10430000	10440000	10001	*	TRUE	TRUE	TRUE
chr2	10130000	10140000	10001	*	chr2	10680000	10690000	10001	*	TRUE	TRUE	TRUE
chr2	10440000	10450000	10001	*	chr2	10680000	10690000	10001	*	TRUE	TRUE	TRUE
chr2	10690000	10700000	10001	*	chr2	11130000	11140000	10001	*	TRUE	TRUE	TRUE
chr2	10690000	10700000	10001	*	chr2	11780000	11790000	10001	*	TRUE	TRUE	TRUE
chr2	10820000	10830000	10001	*	chr2	11130000	11140000	10001	*	TRUE	TRUE	TRUE
chr2	11130000	11140000	10001	*	chr2	11780000	11790000	10001	*	TRUE	FALSE	FALSE
chr2	11140000	11150000	10001	*	chr2	11450000	11460000	10001	*	TRUE	TRUE	TRUE
chr2	11240000	11250000	10001	*	chr2	11460000	11470000	10001	*	FALSE	TRUE	TRUE
chr2	11460000	11470000	10001	*	chr2	11780000	11790000	10001	*	TRUE	TRUE	TRUE
chr2	11470000	11480000	10001	*	chr2	11680000	11690000	10001	*	FALSE	TRUE	TRUE
chr2	11790000	11800000	10001	*	chr2	12720000	12730000	10001	*	TRUE	TRUE	FALSE
chr2	11790000	11800000	10001	*	chr2	13020000	13030000	10001	*	TRUE	TRUE	TRUE
chr2	11830000	11840000	10001	*	chr2	12430000	12440000	10001	*	FALSE	FALSE	TRUE
chr2	12320000	12330000	10001	*	chr2	12710000	12720000	10001	*	TRUE	TRUE	FALSE
chr2	12440000	12450000	10001	*	chr2	12720000	12730000	10001	*	FALSE	FALSE	TRUE
chr2	12730000	12740000	10001	*	chr2	12930000	12940000	10001	*	TRUE	TRUE	TRUE
chr2	12730000	12740000	10001	*	chr2	13020000	13030000	10001	*	TRUE	TRUE	TRUE
chr2	13030000	13040000	10001	*	chr2	14950000	14960000	10001	*	FALSE	FALSE	TRUE
chr2	13030000	13040000	10001	*	chr2	15580000	15590000	10001	*	TRUE	TRUE	TRUE
chr2	13210000	13220000	10001	*	chr2	14280000	14290000	10001	*	FALSE	TRUE	FALSE
chr2	14260000	14270000	10001	*	chr2	14950000	14960000	10001	*	FALSE	FALSE	TRUE
chr2	14290000	14300000	10001	*	chr2	14630000	14640000	10001	*	FALSE	TRUE	FALSE
chr2	14960000	14970000	10001	*	chr2	15170000	15180000	10001	*	TRUE	FALSE	TRUE
chr2	14960000	14970000	10001	*	chr2	15580000	15590000	10001	*	FALSE	FALSE	TRUE
chr2	15180000	15190000	10001	*	chr2	15560000	15570000	10001	*	TRUE	TRUE	FALSE
chr2	15590000	15600000	10001	*	chr2	16510000	16520000	10001	*	TRUE	FALSE	FALSE
chr2	15590000	15600000	10001	*	chr2	16600000	16610000	10001	*	FALSE	TRUE	FALSE
chr2	15590000	15600000	10001	*	chr2	16760000	16770000	10001	*	TRUE	FALSE	TRUE
chr2	15590000	15600000	10001	*	chr2	17670000	17680000	10001	*	FALSE	TRUE	FALSE
chr2	15650000	15660000	10001	*	chr2	15940000	15950000	10001	*	TRUE	TRUE	FALSE
chr2	15650000	15660000	10001	*	chr2	16510000	16520000	10001	*	FALSE	FALSE	TRUE
chr2	15940000	15950000	10001	*	chr2	16480000	16490000	10001	*	TRUE	FALSE	FALSE
chr2	15960000	15970000	10001	*	chr2	16600000	16610000	10001	*	FALSE	TRUE	FALSE
chr2	16760000	16770000	10001	*	chr2	17290000	17300000	10001	*	TRUE	TRUE	TRUE
chr2	16760000	16770000	10001	*	chr2	17670000	17680000	10001	*	TRUE	TRUE	TRUE
chr2	16770000	16780000	10001	*	chr2	18370000	18380000	10001	*	TRUE	FALSE	TRUE
chr2	17360000	17370000	10001	*	chr2	17670000	17680000	10001	*	FALSE	TRUE	FALSE
chr2	17480000	17490000	10001	*	chr2	17680000	17690000	10001	*	TRUE	FALSE	TRUE
chr2	17680000	17690000	10001	*	chr2	18380000	18390000	10001	*	FALSE	TRUE	FALSE
chr2	17680000	17690000	10001	*	chr2	19890000	19900000	10001	*	FALSE	TRUE	FALSE
chr2	17830000	17840000	10001	*	chr2	18370000	18380000	10001	*	TRUE	TRUE	TRUE
chr2	17850000	17860000	10001	*	chr2	18170000	18180000	10001	*	TRUE	FALSE	TRUE
chr2	18170000	18180000	10001	*	chr2	18370000	18380000	10001	*	TRUE	FALSE	FALSE
chr2	18380000	18390000	10001	*	chr2	18740000	18750000	10001	*	TRUE	FALSE	TRUE
chr2	18380000	18390000	10001	*	chr2	19350000	19360000	10001	*	TRUE	FALSE	TRUE
chr2	18380000	18390000	10001	*	chr2	19890000	19900000	10001	*	TRUE	FALSE	FALSE
chr2	18380000	18390000	10001	*	chr2	20090000	20100000	10001	*	FALSE	FALSE	TRUE
chr2	18520000	18530000	10001	*	chr2	19350000	19360000	10001	*	FALSE	TRUE	FALSE
chr2	18520000	18530000	10001	*	chr2	19890000	19900000	10001	*	FALSE	TRUE	FALSE
chr2	18870000	18880000	10001	*	chr2	19350000	19360000	10001	*	TRUE	FALSE	TRUE
chr2	19360000	19370000	10001	*	chr2	19670000	19680000	10001	*	TRUE	FALSE	TRUE
chr2	19360000	19370000	10001	*	chr2	19890000	19900000	10001	*	TRUE	TRUE	TRUE
chr2	19680000	19690000	10001	*	chr2	19880000	19890000	10001	*	TRUE	FALSE	TRUE
chr2	19900000	19910000	10001	*	chr2	20100000	20110000	10001	*	TRUE	TRUE	TRUE
chr2	19900000	19910000	10001	*	chr2	20310000	20320000	10001	*	TRUE	TRUE	FALSE
chr2	19900000	19910000	10001	*	chr2	20650000	20660000	10001	*	TRUE	TRUE	FALSE
chr2	20100000	20110000	10001	*	chr2	20640000	20650000	10001	*	FALSE	FALSE	TRUE
chr2	20110000	20120000	10001	*	chr2	20320000	20330000	10001	*	TRUE	TRUE	TRUE
chr2	20330000	20340000	10001	*	chr2	20640000	20650000	10001	*	TRUE	TRUE	TRUE
chr2	20450000	20460000	10001	*	chr2	20640000	20650000	10001	*	TRUE	TRUE	TRUE
chr2	20650000	20660000	10001	*	chr2	21010000	21020000	10001	*	TRUE	TRUE	TRUE
chr2	20650000	20660000	10001	*	chr2	23340000	23350000	10001	*	TRUE	FALSE	FALSE
chr2	20790000	20800000	10001	*	chr2	21000000	21010000	10001	*	FALSE	TRUE	TRUE
chr2	23150000	23160000	10001	*	chr2	23360000	23370000	10001	*	FALSE	FALSE	TRUE
chr2	23350000	23360000	10001	*	chr2	23770000	23780000	10001	*	TRUE	FALSE	FALSE
chr2	23350000	23360000	10001	*	chr2	25220000	25230000	10001	*	TRUE	FALSE	FALSE
chr2	23370000	23380000	10001	*	chr2	23820000	23830000	10001	*	FALSE	FALSE	TRUE
chr2	23370000	23380000	10001	*	chr2	24960000	24970000	10001	*	FALSE	FALSE	TRUE
chr2	23750000	23760000	10001	*	chr2	24380000	24390000	10001	*	FALSE	TRUE	FALSE
chr2	23770000	23780000	10001	*	chr2	24090000	24100000	10001	*	TRUE	TRUE	FALSE
chr2	23830000	23840000	10001	*	chr2	24080000	24090000	10001	*	FALSE	FALSE	TRUE
chr2	23830000	23840000	10001	*	chr2	24180000	24190000	10001	*	FALSE	FALSE	TRUE
chr2	24190000	24200000	10001	*	chr2	24380000	24390000	10001	*	FALSE	TRUE	TRUE
chr2	24390000	24400000	10001	*	chr2	24790000	24800000	10001	*	TRUE	TRUE	TRUE
chr2	24390000	24400000	10001	*	chr2	24960000	24970000	10001	*	FALSE	FALSE	TRUE
chr2	24390000	24400000	10001	*	chr2	25160000	25170000	10001	*	FALSE	TRUE	FALSE
chr2	24390000	24400000	10001	*	chr2	25220000	25230000	10001	*	TRUE	FALSE	FALSE
chr2	24390000	24400000	10001	*	chr2	25830000	25840000	10001	*	FALSE	TRUE	FALSE
chr2	24800000	24810000	10001	*	chr2	25160000	25170000	10001	*	FALSE	TRUE	FALSE
chr2	24970000	24980000	10001	*	chr2	25580000	25590000	10001	*	FALSE	FALSE	TRUE
chr2	24970000	24980000	10001	*	chr2	26760000	26770000	10001	*	FALSE	FALSE	TRUE
chr2	24980000	24990000	10001	*	chr2	25210000	25220000	10001	*	TRUE	FALSE	TRUE
chr2	25170000	25180000	10001	*	chr2	25830000	25840000	10001	*	FALSE	TRUE	FALSE
chr2	25200000	25210000	10001	*	chr2	25580000	25590000	10001	*	TRUE	TRUE	TRUE
chr2	25230000	25240000	10001	*	chr2	25800000	25810000	10001	*	TRUE	FALSE	FALSE
chr2	25230000	25240000	10001	*	chr2	27310000	27320000	10001	*	TRUE	FALSE	FALSE
chr2	25590000	25600000	10001	*	chr2	25820000	25830000	10001	*	TRUE	TRUE	FALSE
chr2	25840000	25850000	10001	*	chr2	26590000	26600000	10001	*	FALSE	TRUE	FALSE
chr2	25840000	25850000	10001	*	chr2	27370000	27380000	10001	*	FALSE	TRUE	FALSE
chr2	25850000	25860000	10001	*	chr2	26150000	26160000	10001	*	TRUE	TRUE	FALSE
chr2	25960000	25970000	10001	*	chr2	26150000	26160000	10001	*	TRUE	FALSE	FALSE
chr2	25960000	25970000	10001	*	chr2	26470000	26480000	10001	*	FALSE	FALSE	TRUE
chr2	25960000	25970000	10001	*	chr2	26760000	26770000	10001	*	FALSE	FALSE	TRUE
chr2	26160000	26170000	10001	*	chr2	26350000	26360000	10001	*	FALSE	TRUE	FALSE
chr2	26360000	26370000	10001	*	chr2	26590000	26600000	10001	*	FALSE	TRUE	FALSE
chr2	26760000	26770000	10001	*	chr2	27370000	27380000	10001	*	FALSE	TRUE	FALSE
chr2	26770000	26780000	10001	*	chr2	27030000	27040000	10001	*	TRUE	TRUE	TRUE
chr2	26770000	26780000	10001	*	chr2	27680000	27690000	10001	*	FALSE	FALSE	TRUE
chr2	26780000	26790000	10001	*	chr2	27310000	27320000	10001	*	TRUE	FALSE	TRUE
chr2	27040000	27050000	10001	*	chr2	27370000	27380000	10001	*	FALSE	TRUE	FALSE
chr2	27050000	27060000	10001	*	chr2	27310000	27320000	10001	*	TRUE	FALSE	TRUE
chr2	27320000	27330000	10001	*	chr2	27670000	27680000	10001	*	TRUE	FALSE	FALSE
chr2	27320000	27330000	10001	*	chr2	28940000	28950000	10001	*	TRUE	FALSE	FALSE
chr2	27380000	27390000	10001	*	chr2	28940000	28950000	10001	*	FALSE	TRUE	FALSE
chr2	27390000	27400000	10001	*	chr2	27670000	27680000	10001	*	TRUE	TRUE	TRUE
chr2	27680000	27690000	10001	*	chr2	28390000	28400000	10001	*	TRUE	TRUE	TRUE
chr2	27680000	27690000	10001	*	chr2	28560000	28570000	10001	*	FALSE	TRUE	FALSE
chr2	27690000	27700000	10001	*	chr2	28470000	28480000	10001	*	TRUE	FALSE	TRUE
chr2	27690000	27700000	10001	*	chr2	28940000	28950000	10001	*	FALSE	FALSE	TRUE
chr2	28480000	28490000	10001	*	chr2	28770000	28780000	10001	*	TRUE	FALSE	TRUE
chr2	28480000	28490000	10001	*	chr2	28940000	28950000	10001	*	TRUE	FALSE	TRUE
chr2	28570000	28580000	10001	*	chr2	28770000	28780000	10001	*	FALSE	TRUE	FALSE
chr2	28570000	28580000	10001	*	chr2	28940000	28950000	10001	*	FALSE	TRUE	FALSE
chr2	28950000	28960000	10001	*	chr2	29200000	29210000	10001	*	TRUE	TRUE	TRUE
chr2	28950000	28960000	10001	*	chr2	30140000	30150000	10001	*	TRUE	TRUE	TRUE
chr2	29210000	29220000	10001	*	chr2	29840000	29850000	10001	*	TRUE	TRUE	TRUE
chr2	29210000	29220000	10001	*	chr2	30140000	30150000	10001	*	TRUE	TRUE	TRUE
chr2	29840000	29850000	10001	*	chr2	30140000	30150000	10001	*	FALSE	FALSE	TRUE
chr2	29860000	29870000	10001	*	chr2	30080000	30090000	10001	*	TRUE	TRUE	FALSE
chr2	30150000	30160000	10001	*	chr2	30450000	30460000	10001	*	TRUE	TRUE	FALSE
chr2	30150000	30160000	10001	*	chr2	30710000	30720000	10001	*	TRUE	TRUE	TRUE
chr2	30150000	30160000	10001	*	chr2	31650000	31660000	10001	*	FALSE	FALSE	TRUE
chr2	30150000	30160000	10001	*	chr2	31830000	31840000	10001	*	TRUE	TRUE	FALSE
chr2	30450000	30460000	10001	*	chr2	30700000	30710000	10001	*	TRUE	TRUE	TRUE
chr2	30710000	30720000	10001	*	chr2	31650000	31660000	10001	*	FALSE	FALSE	TRUE
chr2	30720000	30730000	10001	*	chr2	31330000	31340000	10001	*	FALSE	TRUE	TRUE
chr2	30720000	30730000	10001	*	chr2	31830000	31840000	10001	*	TRUE	TRUE	FALSE
chr2	31340000	31350000	10001	*	chr2	31650000	31660000	10001	*	FALSE	FALSE	TRUE
chr2	31340000	31350000	10001	*	chr2	31830000	31840000	10001	*	TRUE	TRUE	FALSE
chr2	31660000	31670000	10001	*	chr2	33590000	33600000	10001	*	FALSE	FALSE	TRUE
chr2	31840000	31850000	10001	*	chr2	32160000	32170000	10001	*	TRUE	TRUE	FALSE
chr2	31840000	31850000	10001	*	chr2	32360000	32370000	10001	*	TRUE	FALSE	FALSE
chr2	31840000	31850000	10001	*	chr2	33590000	33600000	10001	*	TRUE	TRUE	FALSE
chr2	32160000	32170000	10001	*	chr2	32360000	32370000	10001	*	TRUE	FALSE	FALSE
chr2	32630000	32640000	10001	*	chr2	33380000	33390000	10001	*	FALSE	FALSE	TRUE
chr2	32640000	32650000	10001	*	chr2	33590000	33600000	10001	*	TRUE	FALSE	TRUE
chr2	32650000	32660000	10001	*	chr2	33300000	33310000	10001	*	TRUE	FALSE	FALSE
chr2	32710000	32720000	10001	*	chr2	33270000	33280000	10001	*	FALSE	TRUE	FALSE
chr2	32710000	32720000	10001	*	chr2	33590000	33600000	10001	*	FALSE	TRUE	FALSE
chr2	33390000	33400000	10001	*	chr2	33590000	33600000	10001	*	TRUE	TRUE	TRUE
chr2	33600000	33610000	10001	*	chr2	34050000	34060000	10001	*	TRUE	FALSE	FALSE
chr2	33600000	33610000	10001	*	chr2	34510000	34520000	10001	*	TRUE	FALSE	FALSE
chr2	33600000	33610000	10001	*	chr2	35150000	35160000	10001	*	FALSE	FALSE	TRUE
chr2	33600000	33610000	10001	*	chr2	36340000	36350000	10001	*	TRUE	TRUE	FALSE
chr2	34060000	34070000	10001	*	chr2	34510000	34520000	10001	*	TRUE	FALSE	FALSE
chr2	34130000	34140000	10001	*	chr2	34470000	34480000	10001	*	FALSE	TRUE	FALSE
chr2	34520000	34530000	10001	*	chr2	35100000	35110000	10001	*	TRUE	FALSE	FALSE
chr2	34580000	34590000	10001	*	chr2	35150000	35160000	10001	*	FALSE	FALSE	TRUE
chr2	35120000	35130000	10001	*	chr2	35380000	35390000	10001	*	FALSE	TRUE	FALSE
chr2	35160000	35170000	10001	*	chr2	35410000	35420000	10001	*	FALSE	FALSE	TRUE
chr2	35160000	35170000	10001	*	chr2	36340000	36350000	10001	*	FALSE	FALSE	TRUE
chr2	36350000	36360000	10001	*	chr2	36670000	36680000	10001	*	TRUE	TRUE	FALSE
chr2	36350000	36360000	10001	*	chr2	37150000	37160000	10001	*	TRUE	TRUE	FALSE
chr2	36750000	36760000	10001	*	chr2	36970000	36980000	10001	*	FALSE	TRUE	FALSE
chr2	36770000	36780000	10001	*	chr2	37150000	37160000	10001	*	TRUE	TRUE	FALSE
chr2	36790000	36800000	10001	*	chr2	37020000	37030000	10001	*	TRUE	FALSE	FALSE
chr2	37160000	37170000	10001	*	chr2	37390000	37400000	10001	*	TRUE	TRUE	FALSE
chr2	37160000	37170000	10001	*	chr2	37880000	37890000	10001	*	TRUE	TRUE	FALSE
chr2	37160000	37170000	10001	*	chr2	38740000	38750000	10001	*	TRUE	TRUE	FALSE
chr2	37400000	37410000	10001	*	chr2	37880000	37890000	10001	*	TRUE	TRUE	FALSE
chr2	37890000	37900000	10001	*	chr2	38280000	38290000	10001	*	TRUE	TRUE	TRUE
chr2	37890000	37900000	10001	*	chr2	38740000	38750000	10001	*	FALSE	FALSE	TRUE
chr2	37980000	37990000	10001	*	chr2	38280000	38290000	10001	*	FALSE	FALSE	TRUE
chr2	38080000	38090000	10001	*	chr2	38280000	38290000	10001	*	TRUE	TRUE	FALSE
chr2	38290000	38300000	10001	*	chr2	38520000	38530000	10001	*	TRUE	TRUE	TRUE
chr2	38290000	38300000	10001	*	chr2	38740000	38750000	10001	*	TRUE	TRUE	TRUE
chr2	38530000	38540000	10001	*	chr2	38740000	38750000	10001	*	TRUE	TRUE	TRUE
chr2	38750000	38760000	10001	*	chr2	39230000	39240000	10001	*	TRUE	TRUE	TRUE
chr2	38750000	38760000	10001	*	chr2	39770000	39780000	10001	*	TRUE	TRUE	TRUE
chr2	39240000	39250000	10001	*	chr2	39770000	39780000	10001	*	TRUE	TRUE	TRUE
chr2	39370000	39380000	10001	*	chr2	39770000	39780000	10001	*	FALSE	FALSE	TRUE
chr2	39520000	39530000	10001	*	chr2	39770000	39780000	10001	*	TRUE	TRUE	FALSE
chr2	39780000	39790000	10001	*	chr2	40210000	40220000	10001	*	FALSE	FALSE	TRUE
chr2	39780000	39790000	10001	*	chr2	40560000	40570000	10001	*	TRUE	FALSE	FALSE
chr2	39780000	39790000	10001	*	chr2	41830000	41840000	10001	*	TRUE	TRUE	TRUE
chr2	39910000	39920000	10001	*	chr2	40190000	40200000	10001	*	TRUE	FALSE	FALSE
chr2	39920000	39930000	10001	*	chr2	40240000	40250000	10001	*	FALSE	TRUE	FALSE
chr2	39920000	39930000	10001	*	chr2	40760000	40770000	10001	*	FALSE	TRUE	FALSE
chr2	40200000	40210000	10001	*	chr2	40560000	40570000	10001	*	TRUE	FALSE	FALSE
chr2	40250000	40260000	10001	*	chr2	40450000	40460000	10001	*	FALSE	TRUE	FALSE
chr2	40570000	40580000	10001	*	chr2	40760000	40770000	10001	*	TRUE	TRUE	FALSE
chr2	40780000	40790000	10001	*	chr2	41830000	41840000	10001	*	TRUE	FALSE	TRUE
chr2	41840000	41850000	10001	*	chr2	42090000	42100000	10001	*	TRUE	TRUE	TRUE
chr2	41840000	41850000	10001	*	chr2	42800000	42810000	10001	*	TRUE	TRUE	TRUE
chr2	42100000	42110000	10001	*	chr2	42330000	42340000	10001	*	TRUE	TRUE	TRUE
chr2	42340000	42350000	10001	*	chr2	42800000	42810000	10001	*	TRUE	TRUE	TRUE
chr2	42810000	42820000	10001	*	chr2	43230000	43240000	10001	*	TRUE	TRUE	TRUE
chr2	42810000	42820000	10001	*	chr2	43600000	43610000	10001	*	TRUE	TRUE	TRUE
chr2	42950000	42960000	10001	*	chr2	43230000	43240000	10001	*	TRUE	TRUE	FALSE
chr2	43030000	43040000	10001	*	chr2	43230000	43240000	10001	*	FALSE	FALSE	TRUE
chr2	43240000	43250000	10001	*	chr2	43480000	43490000	10001	*	TRUE	TRUE	TRUE
chr2	43240000	43250000	10001	*	chr2	43600000	43610000	10001	*	TRUE	TRUE	TRUE
chr2	43590000	43600000	10001	*	chr2	45600000	45610000	10001	*	FALSE	FALSE	TRUE
chr2	43610000	43620000	10001	*	chr2	43870000	43880000	10001	*	TRUE	TRUE	TRUE
chr2	43610000	43620000	10001	*	chr2	43980000	43990000	10001	*	TRUE	TRUE	TRUE
chr2	43610000	43620000	10001	*	chr2	44950000	44960000	10001	*	FALSE	TRUE	FALSE
chr2	43990000	44000000	10001	*	chr2	44360000	44370000	10001	*	TRUE	TRUE	TRUE
chr2	44000000	44010000	10001	*	chr2	44960000	44970000	10001	*	TRUE	FALSE	FALSE
chr2	44000000	44010000	10001	*	chr2	45600000	45610000	10001	*	TRUE	FALSE	FALSE
chr2	44370000	44380000	10001	*	chr2	44960000	44970000	10001	*	TRUE	TRUE	TRUE
chr2	44490000	44500000	10001	*	chr2	44720000	44730000	10001	*	FALSE	TRUE	FALSE
chr2	44490000	44500000	10001	*	chr2	44940000	44950000	10001	*	FALSE	FALSE	TRUE
chr2	44730000	44740000	10001	*	chr2	44950000	44960000	10001	*	FALSE	TRUE	FALSE
chr2	44960000	44970000	10001	*	chr2	45170000	45180000	10001	*	FALSE	TRUE	FALSE
chr2	44970000	44980000	10001	*	chr2	45490000	45500000	10001	*	TRUE	TRUE	TRUE
chr2	44970000	44980000	10001	*	chr2	45600000	45610000	10001	*	TRUE	TRUE	TRUE
chr2	45580000	45590000	10001	*	chr2	45980000	45990000	10001	*	FALSE	TRUE	FALSE
chr2	45610000	45620000	10001	*	chr2	45940000	45950000	10001	*	TRUE	FALSE	TRUE
chr2	45610000	45620000	10001	*	chr2	46460000	46470000	10001	*	TRUE	FALSE	FALSE
chr2	45610000	45620000	10001	*	chr2	47320000	47330000	10001	*	TRUE	FALSE	TRUE
chr2	45660000	45670000	10001	*	chr2	45930000	45940000	10001	*	FALSE	TRUE	FALSE
chr2	45950000	45960000	10001	*	chr2	46460000	46470000	10001	*	TRUE	TRUE	TRUE
chr2	45990000	46000000	10001	*	chr2	47320000	47330000	10001	*	FALSE	TRUE	FALSE
chr2	46070000	46080000	10001	*	chr2	46300000	46310000	10001	*	FALSE	TRUE	FALSE
chr2	46070000	46080000	10001	*	chr2	46370000	46380000	10001	*	FALSE	FALSE	TRUE
chr2	46620000	46630000	10001	*	chr2	46890000	46900000	10001	*	TRUE	TRUE	TRUE
chr2	46900000	46910000	10001	*	chr2	47180000	47190000	10001	*	FALSE	FALSE	TRUE
chr2	46900000	46910000	10001	*	chr2	47320000	47330000	10001	*	TRUE	TRUE	TRUE
chr2	46990000	47000000	10001	*	chr2	47320000	47330000	10001	*	FALSE	TRUE	FALSE
chr2	47000000	47010000	10001	*	chr2	47270000	47280000	10001	*	TRUE	FALSE	FALSE
chr2	47330000	47340000	10001	*	chr2	47770000	47780000	10001	*	TRUE	TRUE	TRUE
chr2	47330000	47340000	10001	*	chr2	48590000	48600000	10001	*	TRUE	TRUE	TRUE
chr2	47440000	47450000	10001	*	chr2	47770000	47780000	10001	*	TRUE	TRUE	TRUE
chr2	47780000	47790000	10001	*	chr2	48110000	48120000	10001	*	TRUE	TRUE	TRUE
chr2	47920000	47930000	10001	*	chr2	48110000	48120000	10001	*	TRUE	FALSE	FALSE
chr2	48120000	48130000	10001	*	chr2	48420000	48430000	10001	*	TRUE	TRUE	TRUE
chr2	48120000	48130000	10001	*	chr2	48590000	48600000	10001	*	TRUE	TRUE	TRUE
chr2	48600000	48610000	10001	*	chr2	48940000	48950000	10001	*	TRUE	TRUE	TRUE
chr2	48600000	48610000	10001	*	chr2	50490000	50500000	10001	*	TRUE	TRUE	TRUE
chr2	48950000	48960000	10001	*	chr2	49190000	49200000	10001	*	FALSE	FALSE	TRUE
chr2	48950000	48960000	10001	*	chr2	49250000	49260000	10001	*	TRUE	FALSE	FALSE
chr2	50160000	50170000	10001	*	chr2	50490000	50500000	10001	*	TRUE	TRUE	TRUE
chr2	50500000	50510000	10001	*	chr2	52390000	52400000	10001	*	TRUE	FALSE	FALSE
chr2	50500000	50510000	10001	*	chr2	52520000	52530000	10001	*	FALSE	FALSE	TRUE
chr2	50500000	50510000	10001	*	chr2	52780000	52790000	10001	*	FALSE	TRUE	FALSE
chr2	52400000	52410000	10001	*	chr2	52800000	52810000	10001	*	TRUE	FALSE	FALSE
chr2	52400000	52410000	10001	*	chr2	53760000	53770000	10001	*	TRUE	FALSE	FALSE
chr2	52540000	52550000	10001	*	chr2	52770000	52780000	10001	*	FALSE	TRUE	TRUE
chr2	52550000	52560000	10001	*	chr2	53210000	53220000	10001	*	FALSE	FALSE	TRUE
chr2	52550000	52560000	10001	*	chr2	53850000	53860000	10001	*	FALSE	FALSE	TRUE
chr2	52780000	52790000	10001	*	chr2	53210000	53220000	10001	*	FALSE	TRUE	TRUE
chr2	52790000	52800000	10001	*	chr2	52980000	52990000	10001	*	FALSE	TRUE	FALSE
chr2	52790000	52800000	10001	*	chr2	53780000	53790000	10001	*	FALSE	TRUE	FALSE
chr2	52990000	53000000	10001	*	chr2	53200000	53210000	10001	*	FALSE	TRUE	FALSE
chr2	53210000	53220000	10001	*	chr2	53400000	53410000	10001	*	TRUE	TRUE	FALSE
chr2	53210000	53220000	10001	*	chr2	53760000	53770000	10001	*	TRUE	TRUE	FALSE
chr2	53410000	53420000	10001	*	chr2	53760000	53770000	10001	*	TRUE	TRUE	TRUE
chr2	53770000	53780000	10001	*	chr2	53970000	53980000	10001	*	TRUE	FALSE	FALSE
chr2	53780000	53790000	10001	*	chr2	54710000	54720000	10001	*	TRUE	TRUE	FALSE
chr2	53780000	53790000	10001	*	chr2	55610000	55620000	10001	*	TRUE	TRUE	FALSE
chr2	53860000	53870000	10001	*	chr2	54100000	54110000	10001	*	FALSE	FALSE	TRUE
chr2	53860000	53870000	10001	*	chr2	54710000	54720000	10001	*	FALSE	FALSE	TRUE
chr2	53860000	53870000	10001	*	chr2	55610000	55620000	10001	*	FALSE	FALSE	TRUE
chr2	54100000	54110000	10001	*	chr2	54710000	54720000	10001	*	TRUE	TRUE	FALSE
chr2	54110000	54120000	10001	*	chr2	54520000	54530000	10001	*	FALSE	FALSE	TRUE
chr2	54860000	54870000	10001	*	chr2	55200000	55210000	10001	*	TRUE	TRUE	TRUE
chr2	55210000	55220000	10001	*	chr2	55520000	55530000	10001	*	TRUE	TRUE	TRUE
chr2	55210000	55220000	10001	*	chr2	55610000	55620000	10001	*	TRUE	TRUE	TRUE
chr2	55620000	55630000	10001	*	chr2	56020000	56030000	10001	*	TRUE	FALSE	FALSE
chr2	55620000	55630000	10001	*	chr2	56140000	56150000	10001	*	FALSE	TRUE	TRUE
chr2	55620000	55630000	10001	*	chr2	57520000	57530000	10001	*	TRUE	TRUE	TRUE
chr2	55700000	55710000	10001	*	chr2	56020000	56030000	10001	*	TRUE	FALSE	FALSE
chr2	55700000	55710000	10001	*	chr2	56130000	56140000	10001	*	FALSE	TRUE	FALSE
chr2	55780000	55790000	10001	*	chr2	56020000	56030000	10001	*	FALSE	FALSE	TRUE
chr2	56150000	56160000	10001	*	chr2	56750000	56760000	10001	*	TRUE	TRUE	TRUE
chr2	56150000	56160000	10001	*	chr2	57510000	57520000	10001	*	TRUE	TRUE	TRUE
chr2	56760000	56770000	10001	*	chr2	57500000	57510000	10001	*	TRUE	FALSE	TRUE
chr2	57530000	57540000	10001	*	chr2	58440000	58450000	10001	*	FALSE	TRUE	FALSE
chr2	57540000	57550000	10001	*	chr2	58750000	58760000	10001	*	TRUE	FALSE	TRUE
chr2	57710000	57720000	10001	*	chr2	58120000	58130000	10001	*	TRUE	TRUE	FALSE
chr2	57710000	57720000	10001	*	chr2	58450000	58460000	10001	*	TRUE	TRUE	TRUE
chr2	57720000	57730000	10001	*	chr2	58750000	58760000	10001	*	FALSE	FALSE	TRUE
chr2	58250000	58260000	10001	*	chr2	58440000	58450000	10001	*	TRUE	TRUE	FALSE
chr2	58450000	58460000	10001	*	chr2	58760000	58770000	10001	*	FALSE	TRUE	FALSE
chr2	58450000	58460000	10001	*	chr2	60690000	60700000	10001	*	FALSE	TRUE	FALSE
chr2	58570000	58580000	10001	*	chr2	58760000	58770000	10001	*	FALSE	TRUE	FALSE
chr2	58760000	58770000	10001	*	chr2	59290000	59300000	10001	*	TRUE	FALSE	TRUE
chr2	58760000	58770000	10001	*	chr2	60690000	60700000	10001	*	TRUE	FALSE	TRUE
chr2	59270000	59280000	10001	*	chr2	60520000	60530000	10001	*	FALSE	TRUE	FALSE
chr2	60700000	60710000	10001	*	chr2	61010000	61020000	10001	*	TRUE	TRUE	TRUE
chr2	60700000	60710000	10001	*	chr2	61890000	61900000	10001	*	TRUE	TRUE	TRUE
chr2	60800000	60810000	10001	*	chr2	61010000	61020000	10001	*	TRUE	TRUE	TRUE
chr2	61020000	61030000	10001	*	chr2	61450000	61460000	10001	*	TRUE	TRUE	FALSE
chr2	61020000	61030000	10001	*	chr2	61890000	61900000	10001	*	TRUE	TRUE	FALSE
chr2	61180000	61190000	10001	*	chr2	61490000	61500000	10001	*	FALSE	FALSE	TRUE
chr2	61180000	61190000	10001	*	chr2	61900000	61910000	10001	*	FALSE	FALSE	TRUE
chr2	61480000	61490000	10001	*	chr2	61890000	61900000	10001	*	TRUE	TRUE	TRUE
chr2	61900000	61910000	10001	*	chr2	62410000	62420000	10001	*	TRUE	TRUE	TRUE
chr2	61900000	61910000	10001	*	chr2	63560000	63570000	10001	*	TRUE	TRUE	TRUE
chr2	61910000	61920000	10001	*	chr2	62190000	62200000	10001	*	FALSE	FALSE	TRUE
chr2	62200000	62210000	10001	*	chr2	62400000	62410000	10001	*	FALSE	FALSE	TRUE
chr2	62420000	62430000	10001	*	chr2	62780000	62790000	10001	*	TRUE	TRUE	TRUE
chr2	62790000	62800000	10001	*	chr2	63030000	63040000	10001	*	TRUE	TRUE	TRUE
chr2	62790000	62800000	10001	*	chr2	63560000	63570000	10001	*	TRUE	TRUE	TRUE
chr2	63040000	63050000	10001	*	chr2	63540000	63550000	10001	*	FALSE	FALSE	TRUE
chr2	63210000	63220000	10001	*	chr2	63580000	63590000	10001	*	TRUE	TRUE	FALSE
chr2	63570000	63580000	10001	*	chr2	64020000	64030000	10001	*	TRUE	FALSE	TRUE
chr2	63570000	63580000	10001	*	chr2	64330000	64340000	10001	*	FALSE	TRUE	TRUE
chr2	63570000	63580000	10001	*	chr2	65570000	65580000	10001	*	TRUE	TRUE	TRUE
chr2	63580000	63590000	10001	*	chr2	63890000	63900000	10001	*	TRUE	FALSE	FALSE
chr2	63590000	63600000	10001	*	chr2	63940000	63950000	10001	*	FALSE	TRUE	FALSE
chr2	64030000	64040000	10001	*	chr2	64320000	64330000	10001	*	TRUE	TRUE	TRUE
chr2	64340000	64350000	10001	*	chr2	64570000	64580000	10001	*	FALSE	TRUE	TRUE
chr2	64580000	64590000	10001	*	chr2	64890000	64900000	10001	*	TRUE	TRUE	TRUE
chr2	64660000	64670000	10001	*	chr2	64860000	64870000	10001	*	TRUE	TRUE	TRUE
chr2	65060000	65070000	10001	*	chr2	65570000	65580000	10001	*	TRUE	TRUE	TRUE
chr2	65240000	65250000	10001	*	chr2	65570000	65580000	10001	*	TRUE	TRUE	TRUE
chr2	65580000	65590000	10001	*	chr2	66420000	66430000	10001	*	TRUE	TRUE	TRUE
chr2	65580000	65590000	10001	*	chr2	68040000	68050000	10001	*	TRUE	TRUE	TRUE
chr2	66580000	66590000	10001	*	chr2	67230000	67240000	10001	*	TRUE	TRUE	TRUE
chr2	66580000	66590000	10001	*	chr2	68040000	68050000	10001	*	TRUE	TRUE	TRUE
chr2	67220000	67230000	10001	*	chr2	67480000	67490000	10001	*	TRUE	FALSE	FALSE
chr2	67340000	67350000	10001	*	chr2	67660000	67670000	10001	*	FALSE	TRUE	FALSE
chr2	67490000	67500000	10001	*	chr2	67850000	67860000	10001	*	TRUE	FALSE	FALSE
chr2	67660000	67670000	10001	*	chr2	67850000	67860000	10001	*	FALSE	FALSE	TRUE
chr2	68050000	68060000	10001	*	chr2	68250000	68260000	10001	*	TRUE	TRUE	TRUE
chr2	68050000	68060000	10001	*	chr2	68450000	68460000	10001	*	TRUE	TRUE	TRUE
chr2	68050000	68060000	10001	*	chr2	69310000	69320000	10001	*	TRUE	TRUE	FALSE
chr2	68050000	68060000	10001	*	chr2	69710000	69720000	10001	*	FALSE	FALSE	TRUE
chr2	68260000	68270000	10001	*	chr2	68450000	68460000	10001	*	TRUE	TRUE	FALSE
chr2	68460000	68470000	10001	*	chr2	68700000	68710000	10001	*	TRUE	TRUE	TRUE
chr2	68460000	68470000	10001	*	chr2	68930000	68940000	10001	*	TRUE	TRUE	TRUE
chr2	68710000	68720000	10001	*	chr2	68930000	68940000	10001	*	TRUE	TRUE	TRUE
chr2	68940000	68950000	10001	*	chr2	69310000	69320000	10001	*	TRUE	TRUE	TRUE
chr2	69020000	69030000	10001	*	chr2	69300000	69310000	10001	*	TRUE	TRUE	TRUE
chr2	69320000	69330000	10001	*	chr2	69530000	69540000	10001	*	TRUE	FALSE	TRUE
chr2	69320000	69330000	10001	*	chr2	69710000	69720000	10001	*	TRUE	TRUE	TRUE
chr2	69720000	69730000	10001	*	chr2	70290000	70300000	10001	*	TRUE	TRUE	TRUE
chr2	69720000	69730000	10001	*	chr2	70990000	71000000	10001	*	FALSE	FALSE	TRUE
chr2	69890000	69900000	10001	*	chr2	70290000	70300000	10001	*	TRUE	TRUE	TRUE
chr2	69900000	69910000	10001	*	chr2	70150000	70160000	10001	*	TRUE	TRUE	FALSE
chr2	70300000	70310000	10001	*	chr2	70650000	70660000	10001	*	TRUE	TRUE	TRUE
chr2	70300000	70310000	10001	*	chr2	70970000	70980000	10001	*	TRUE	TRUE	TRUE
chr2	70300000	70310000	10001	*	chr2	71520000	71530000	10001	*	TRUE	TRUE	FALSE
chr2	70660000	70670000	10001	*	chr2	70970000	70980000	10001	*	TRUE	TRUE	TRUE
chr2	70990000	71000000	10001	*	chr2	71510000	71520000	10001	*	TRUE	FALSE	TRUE
chr2	71000000	71010000	10001	*	chr2	72880000	72890000	10001	*	FALSE	FALSE	TRUE
chr2	71140000	71150000	10001	*	chr2	71510000	71520000	10001	*	TRUE	TRUE	TRUE
chr2	71300000	71310000	10001	*	chr2	71520000	71530000	10001	*	FALSE	TRUE	FALSE
chr2	71520000	71530000	10001	*	chr2	72150000	72160000	10001	*	TRUE	TRUE	TRUE
chr2	71520000	71530000	10001	*	chr2	72880000	72890000	10001	*	FALSE	FALSE	TRUE
chr2	71530000	71540000	10001	*	chr2	72750000	72760000	10001	*	TRUE	TRUE	FALSE
chr2	71530000	71540000	10001	*	chr2	73220000	73230000	10001	*	TRUE	TRUE	FALSE
chr2	72160000	72170000	10001	*	chr2	72750000	72760000	10001	*	TRUE	TRUE	TRUE
chr2	72870000	72880000	10001	*	chr2	73210000	73220000	10001	*	TRUE	TRUE	TRUE
chr2	72990000	73000000	10001	*	chr2	73210000	73220000	10001	*	TRUE	TRUE	TRUE
chr2	73230000	73240000	10001	*	chr2	75700000	75710000	10001	*	FALSE	TRUE	FALSE
chr2	74180000	74190000	10001	*	chr2	74410000	74420000	10001	*	TRUE	TRUE	FALSE
chr2	74210000	74220000	10001	*	chr2	74440000	74450000	10001	*	FALSE	FALSE	TRUE
chr2	74600000	74610000	10001	*	chr2	74990000	75000000	10001	*	TRUE	FALSE	FALSE
chr2	74600000	74610000	10001	*	chr2	75700000	75710000	10001	*	TRUE	FALSE	FALSE
chr2	74670000	74680000	10001	*	chr2	75700000	75710000	10001	*	FALSE	TRUE	FALSE
chr2	74680000	74690000	10001	*	chr2	74870000	74880000	10001	*	FALSE	FALSE	TRUE
chr2	74680000	74690000	10001	*	chr2	75000000	75010000	10001	*	TRUE	TRUE	FALSE
chr2	74880000	74890000	10001	*	chr2	75700000	75710000	10001	*	FALSE	FALSE	TRUE
chr2	75030000	75040000	10001	*	chr2	75420000	75430000	10001	*	TRUE	TRUE	TRUE
chr2	75420000	75430000	10001	*	chr2	75700000	75710000	10001	*	TRUE	TRUE	TRUE
chr2	75430000	75440000	10001	*	chr2	75630000	75640000	10001	*	TRUE	FALSE	FALSE
chr2	75710000	75720000	10001	*	chr2	76600000	76610000	10001	*	TRUE	FALSE	FALSE
chr2	75710000	75720000	10001	*	chr2	76940000	76950000	10001	*	TRUE	FALSE	FALSE
chr2	75710000	75720000	10001	*	chr2	77670000	77680000	10001	*	FALSE	TRUE	TRUE
chr2	76610000	76620000	10001	*	chr2	76920000	76930000	10001	*	TRUE	FALSE	TRUE
chr2	76890000	76900000	10001	*	chr2	77660000	77670000	10001	*	FALSE	TRUE	FALSE
chr2	76950000	76960000	10001	*	chr2	77660000	77670000	10001	*	TRUE	FALSE	FALSE
chr2	76970000	76980000	10001	*	chr2	77600000	77610000	10001	*	FALSE	FALSE	TRUE
chr2	79870000	79880000	10001	*	chr2	80060000	80070000	10001	*	FALSE	TRUE	FALSE
chr2	79880000	79890000	10001	*	chr2	80250000	80260000	10001	*	TRUE	FALSE	TRUE
chr2	79890000	79900000	10001	*	chr2	81890000	81900000	10001	*	TRUE	FALSE	FALSE
chr2	80070000	80080000	10001	*	chr2	80270000	80280000	10001	*	FALSE	TRUE	TRUE
chr2	80250000	80260000	10001	*	chr2	80510000	80520000	10001	*	TRUE	FALSE	FALSE
chr2	80300000	80310000	10001	*	chr2	80520000	80530000	10001	*	FALSE	TRUE	FALSE
chr2	81900000	81910000	10001	*	chr2	83200000	83210000	10001	*	TRUE	FALSE	FALSE
chr2	81900000	81910000	10001	*	chr2	84310000	84320000	10001	*	FALSE	FALSE	TRUE
chr2	81900000	81910000	10001	*	chr2	84420000	84430000	10001	*	TRUE	FALSE	FALSE
chr2	83830000	83840000	10001	*	chr2	84020000	84030000	10001	*	FALSE	FALSE	TRUE
chr2	83830000	83840000	10001	*	chr2	84310000	84320000	10001	*	TRUE	FALSE	TRUE
chr2	83850000	83860000	10001	*	chr2	84420000	84430000	10001	*	TRUE	TRUE	FALSE
chr2	83990000	84000000	10001	*	chr2	84310000	84320000	10001	*	FALSE	TRUE	FALSE
chr2	84320000	84330000	10001	*	chr2	84880000	84890000	10001	*	FALSE	FALSE	TRUE
chr2	84430000	84440000	10001	*	chr2	85300000	85310000	10001	*	TRUE	TRUE	FALSE
chr2	84430000	84440000	10001	*	chr2	86220000	86230000	10001	*	TRUE	TRUE	FALSE
chr2	85310000	85320000	10001	*	chr2	85610000	85620000	10001	*	TRUE	TRUE	TRUE
chr2	85620000	85630000	10001	*	chr2	85850000	85860000	10001	*	FALSE	FALSE	TRUE
chr2	85620000	85630000	10001	*	chr2	86220000	86230000	10001	*	TRUE	TRUE	FALSE
chr2	85860000	85870000	10001	*	chr2	86080000	86090000	10001	*	FALSE	FALSE	TRUE
chr2	85860000	85870000	10001	*	chr2	86180000	86190000	10001	*	FALSE	FALSE	TRUE
chr2	86210000	86220000	10001	*	chr2	86650000	86660000	10001	*	FALSE	TRUE	FALSE
chr2	86480000	86490000	10001	*	chr2	86670000	86680000	10001	*	FALSE	FALSE	TRUE
chr2	95000000	95010000	10001	*	chr2	95250000	95260000	10001	*	FALSE	TRUE	TRUE
chr2	95240000	95250000	10001	*	chr2	95770000	95780000	10001	*	FALSE	TRUE	FALSE
chr2	96530000	96540000	10001	*	chr2	96860000	96870000	10001	*	FALSE	TRUE	FALSE
chr2	97710000	97720000	10001	*	chr2	98390000	98400000	10001	*	TRUE	FALSE	TRUE
chr2	97710000	97720000	10001	*	chr2	98600000	98610000	10001	*	TRUE	FALSE	FALSE
chr2	98400000	98410000	10001	*	chr2	98600000	98610000	10001	*	TRUE	TRUE	TRUE
chr2	98610000	98620000	10001	*	chr2	98840000	98850000	10001	*	TRUE	TRUE	FALSE
chr2	98610000	98620000	10001	*	chr2	99070000	99080000	10001	*	TRUE	TRUE	TRUE
chr2	98610000	98620000	10001	*	chr2	99490000	99500000	10001	*	TRUE	TRUE	TRUE
chr2	98850000	98860000	10001	*	chr2	99070000	99080000	10001	*	TRUE	TRUE	FALSE
chr2	99150000	99160000	10001	*	chr2	99490000	99500000	10001	*	TRUE	TRUE	TRUE
chr2	99500000	99510000	10001	*	chr2	100990000	101000000	10001	*	TRUE	FALSE	FALSE
chr2	100250000	100260000	10001	*	chr2	100560000	100570000	10001	*	FALSE	FALSE	TRUE
chr2	100570000	100580000	10001	*	chr2	101000000	101010000	10001	*	TRUE	FALSE	TRUE
chr2	100740000	100750000	10001	*	chr2	100990000	101000000	10001	*	TRUE	FALSE	FALSE
chr2	101000000	101010000	10001	*	chr2	102450000	102460000	10001	*	TRUE	FALSE	FALSE
chr2	101010000	101020000	10001	*	chr2	101250000	101260000	10001	*	TRUE	FALSE	TRUE
chr2	101010000	101020000	10001	*	chr2	101320000	101330000	10001	*	FALSE	FALSE	TRUE
chr2	101260000	101270000	10001	*	chr2	101840000	101850000	10001	*	TRUE	FALSE	FALSE
chr2	101260000	101270000	10001	*	chr2	102450000	102460000	10001	*	TRUE	FALSE	FALSE
chr2	101310000	101320000	10001	*	chr2	101690000	101700000	10001	*	FALSE	TRUE	FALSE
chr2	101310000	101320000	10001	*	chr2	102730000	102740000	10001	*	FALSE	TRUE	FALSE
chr2	101320000	101330000	10001	*	chr2	101850000	101860000	10001	*	FALSE	TRUE	TRUE
chr2	101330000	101340000	10001	*	chr2	102800000	102810000	10001	*	FALSE	FALSE	TRUE
chr2	101420000	101430000	10001	*	chr2	101680000	101690000	10001	*	FALSE	FALSE	TRUE
chr2	102000000	102010000	10001	*	chr2	102240000	102250000	10001	*	FALSE	TRUE	TRUE
chr2	102000000	102010000	10001	*	chr2	102450000	102460000	10001	*	TRUE	TRUE	TRUE
chr2	102250000	102260000	10001	*	chr2	102450000	102460000	10001	*	FALSE	TRUE	TRUE
chr2	102460000	102470000	10001	*	chr2	102730000	102740000	10001	*	TRUE	TRUE	TRUE
chr2	102460000	102470000	10001	*	chr2	102800000	102810000	10001	*	FALSE	FALSE	TRUE
chr2	102740000	102750000	10001	*	chr2	103150000	103160000	10001	*	FALSE	TRUE	FALSE
chr2	102740000	102750000	10001	*	chr2	105030000	105040000	10001	*	FALSE	TRUE	FALSE
chr2	102810000	102820000	10001	*	chr2	105100000	105110000	10001	*	FALSE	FALSE	TRUE
chr2	102830000	102840000	10001	*	chr2	103150000	103160000	10001	*	FALSE	TRUE	FALSE
chr2	102880000	102890000	10001	*	chr2	103170000	103180000	10001	*	FALSE	FALSE	TRUE
chr2	102950000	102960000	10001	*	chr2	103190000	103200000	10001	*	TRUE	FALSE	FALSE
chr2	104410000	104420000	10001	*	chr2	104950000	104960000	10001	*	FALSE	FALSE	TRUE
chr2	104420000	104430000	10001	*	chr2	104880000	104890000	10001	*	TRUE	FALSE	TRUE
chr2	104470000	104480000	10001	*	chr2	104850000	104860000	10001	*	FALSE	TRUE	FALSE
chr2	105040000	105050000	10001	*	chr2	105310000	105320000	10001	*	TRUE	TRUE	FALSE
chr2	105040000	105050000	10001	*	chr2	105970000	105980000	10001	*	FALSE	TRUE	FALSE
chr2	105110000	105120000	10001	*	chr2	105320000	105330000	10001	*	TRUE	FALSE	TRUE
chr2	105320000	105330000	10001	*	chr2	105970000	105980000	10001	*	FALSE	TRUE	FALSE
chr2	105330000	105340000	10001	*	chr2	105540000	105550000	10001	*	TRUE	FALSE	TRUE
chr2	105540000	105550000	10001	*	chr2	106090000	106100000	10001	*	TRUE	FALSE	FALSE
chr2	105560000	105570000	10001	*	chr2	106240000	106250000	10001	*	FALSE	FALSE	TRUE
chr2	106060000	106070000	10001	*	chr2	106270000	106280000	10001	*	FALSE	TRUE	FALSE
chr2	106580000	106590000	10001	*	chr2	106850000	106860000	10001	*	TRUE	FALSE	FALSE
chr2	106640000	106650000	10001	*	chr2	106850000	106860000	10001	*	TRUE	FALSE	FALSE
chr2	108630000	108640000	10001	*	chr2	108980000	108990000	10001	*	FALSE	TRUE	FALSE
chr2	108630000	108640000	10001	*	chr2	109750000	109760000	10001	*	FALSE	TRUE	FALSE
chr2	109130000	109140000	10001	*	chr2	109530000	109540000	10001	*	FALSE	TRUE	FALSE
chr2	110740000	110750000	10001	*	chr2	111130000	111140000	10001	*	TRUE	FALSE	FALSE
chr2	110820000	110830000	10001	*	chr2	111120000	111130000	10001	*	TRUE	FALSE	FALSE
chr2	113730000	113740000	10001	*	chr2	113960000	113970000	10001	*	TRUE	FALSE	TRUE
chr2	117810000	117820000	10001	*	chr2	118010000	118020000	10001	*	TRUE	TRUE	TRUE
chr2	117810000	117820000	10001	*	chr2	118870000	118880000	10001	*	FALSE	FALSE	TRUE
chr2	117810000	117820000	10001	*	chr2	119480000	119490000	10001	*	TRUE	FALSE	FALSE
chr2	117810000	117820000	10001	*	chr2	119670000	119680000	10001	*	FALSE	TRUE	FALSE
chr2	118020000	118030000	10001	*	chr2	118870000	118880000	10001	*	FALSE	TRUE	FALSE
chr2	118150000	118160000	10001	*	chr2	118370000	118380000	10001	*	TRUE	FALSE	FALSE
chr2	118150000	118160000	10001	*	chr2	118870000	118880000	10001	*	TRUE	FALSE	FALSE
chr2	118210000	118220000	10001	*	chr2	118850000	118860000	10001	*	FALSE	TRUE	TRUE
chr2	118380000	118390000	10001	*	chr2	118850000	118860000	10001	*	TRUE	FALSE	FALSE
chr2	118880000	118890000	10001	*	chr2	119320000	119330000	10001	*	TRUE	TRUE	TRUE
chr2	118880000	118890000	10001	*	chr2	119480000	119490000	10001	*	TRUE	FALSE	TRUE
chr2	118880000	118890000	10001	*	chr2	119670000	119680000	10001	*	FALSE	TRUE	FALSE
chr2	119010000	119020000	10001	*	chr2	119300000	119310000	10001	*	FALSE	FALSE	TRUE
chr2	119330000	119340000	10001	*	chr2	119670000	119680000	10001	*	FALSE	TRUE	FALSE
chr2	119480000	119490000	10001	*	chr2	119670000	119680000	10001	*	FALSE	FALSE	TRUE
chr2	119490000	119500000	10001	*	chr2	120200000	120210000	10001	*	TRUE	FALSE	TRUE
chr2	119490000	119500000	10001	*	chr2	121070000	121080000	10001	*	TRUE	FALSE	TRUE
chr2	119680000	119690000	10001	*	chr2	119890000	119900000	10001	*	FALSE	TRUE	FALSE
chr2	119680000	119690000	10001	*	chr2	120190000	120200000	10001	*	TRUE	TRUE	TRUE
chr2	119680000	119690000	10001	*	chr2	121070000	121080000	10001	*	FALSE	TRUE	FALSE
chr2	119900000	119910000	10001	*	chr2	120190000	120200000	10001	*	FALSE	TRUE	FALSE
chr2	120320000	120330000	10001	*	chr2	120680000	120690000	10001	*	TRUE	TRUE	TRUE
chr2	120690000	120700000	10001	*	chr2	121070000	121080000	10001	*	TRUE	TRUE	TRUE
chr2	121080000	121090000	10001	*	chr2	121360000	121370000	10001	*	TRUE	TRUE	TRUE
chr2	121080000	121090000	10001	*	chr2	121770000	121780000	10001	*	TRUE	TRUE	TRUE
chr2	121140000	121150000	10001	*	chr2	121360000	121370000	10001	*	FALSE	TRUE	TRUE
chr2	121370000	121380000	10001	*	chr2	121770000	121780000	10001	*	TRUE	TRUE	TRUE
chr2	121540000	121550000	10001	*	chr2	121770000	121780000	10001	*	TRUE	TRUE	TRUE
chr2	121770000	121780000	10001	*	chr2	121960000	121970000	10001	*	FALSE	TRUE	FALSE
chr2	121780000	121790000	10001	*	chr2	122010000	122020000	10001	*	TRUE	FALSE	TRUE
chr2	121780000	121790000	10001	*	chr2	124010000	124020000	10001	*	TRUE	TRUE	TRUE
chr2	121970000	121980000	10001	*	chr2	122190000	122200000	10001	*	FALSE	TRUE	FALSE
chr2	122020000	122030000	10001	*	chr2	122450000	122460000	10001	*	TRUE	FALSE	FALSE
chr2	122190000	122200000	10001	*	chr2	122470000	122480000	10001	*	TRUE	FALSE	TRUE
chr2	122460000	122470000	10001	*	chr2	122750000	122760000	10001	*	TRUE	FALSE	FALSE
chr2	122760000	122770000	10001	*	chr2	122970000	122980000	10001	*	FALSE	FALSE	TRUE
chr2	122760000	122770000	10001	*	chr2	124010000	124020000	10001	*	FALSE	TRUE	FALSE
chr2	122960000	122970000	10001	*	chr2	124010000	124020000	10001	*	TRUE	FALSE	FALSE
chr2	124020000	124030000	10001	*	chr2	125730000	125740000	10001	*	TRUE	FALSE	FALSE
chr2	124790000	124800000	10001	*	chr2	125730000	125740000	10001	*	TRUE	FALSE	FALSE
chr2	125740000	125750000	10001	*	chr2	127050000	127060000	10001	*	TRUE	FALSE	FALSE
chr2	127060000	127070000	10001	*	chr2	127500000	127510000	10001	*	TRUE	FALSE	TRUE
chr2	127060000	127070000	10001	*	chr2	128020000	128030000	10001	*	TRUE	FALSE	FALSE
chr2	127060000	127070000	10001	*	chr2	128310000	128320000	10001	*	FALSE	FALSE	TRUE
chr2	127190000	127200000	10001	*	chr2	127500000	127510000	10001	*	FALSE	TRUE	TRUE
chr2	127190000	127200000	10001	*	chr2	127850000	127860000	10001	*	FALSE	TRUE	FALSE
chr2	127300000	127310000	10001	*	chr2	127490000	127500000	10001	*	TRUE	FALSE	FALSE
chr2	127500000	127510000	10001	*	chr2	127700000	127710000	10001	*	FALSE	TRUE	FALSE
chr2	127670000	127680000	10001	*	chr2	128020000	128030000	10001	*	TRUE	FALSE	FALSE
chr2	127860000	127870000	10001	*	chr2	128310000	128320000	10001	*	FALSE	FALSE	TRUE
chr2	128030000	128040000	10001	*	chr2	128310000	128320000	10001	*	TRUE	FALSE	FALSE
chr2	128320000	128330000	10001	*	chr2	128760000	128770000	10001	*	FALSE	TRUE	FALSE
chr2	128320000	128330000	10001	*	chr2	129250000	129260000	10001	*	TRUE	FALSE	FALSE
chr2	128320000	128330000	10001	*	chr2	129840000	129850000	10001	*	TRUE	FALSE	FALSE
chr2	131440000	131450000	10001	*	chr2	131670000	131680000	10001	*	TRUE	TRUE	FALSE
chr2	131690000	131700000	10001	*	chr2	133840000	133850000	10001	*	FALSE	FALSE	TRUE
chr2	132340000	132350000	10001	*	chr2	132550000	132560000	10001	*	FALSE	TRUE	FALSE
chr2	132340000	132350000	10001	*	chr2	132670000	132680000	10001	*	TRUE	FALSE	FALSE
chr2	132350000	132360000	10001	*	chr2	133170000	133180000	10001	*	TRUE	FALSE	TRUE
chr2	132360000	132370000	10001	*	chr2	133840000	133850000	10001	*	FALSE	FALSE	TRUE
chr2	132680000	132690000	10001	*	chr2	133160000	133170000	10001	*	TRUE	FALSE	FALSE
chr2	133180000	133190000	10001	*	chr2	133560000	133570000	10001	*	TRUE	FALSE	FALSE
chr2	133180000	133190000	10001	*	chr2	133870000	133880000	10001	*	TRUE	FALSE	FALSE
chr2	133240000	133250000	10001	*	chr2	133510000	133520000	10001	*	FALSE	TRUE	FALSE
chr2	133240000	133250000	10001	*	chr2	133860000	133870000	10001	*	FALSE	TRUE	FALSE
chr2	133530000	133540000	10001	*	chr2	133850000	133860000	10001	*	FALSE	TRUE	TRUE
chr2	133570000	133580000	10001	*	chr2	133870000	133880000	10001	*	TRUE	FALSE	FALSE
chr2	133870000	133880000	10001	*	chr2	134090000	134100000	10001	*	TRUE	TRUE	TRUE
chr2	133870000	133880000	10001	*	chr2	134440000	134450000	10001	*	TRUE	TRUE	TRUE
chr2	133870000	133880000	10001	*	chr2	134910000	134920000	10001	*	TRUE	TRUE	TRUE
chr2	134100000	134110000	10001	*	chr2	134440000	134450000	10001	*	TRUE	TRUE	TRUE
chr2	134450000	134460000	10001	*	chr2	134650000	134660000	10001	*	TRUE	FALSE	FALSE
chr2	134450000	134460000	10001	*	chr2	134910000	134920000	10001	*	TRUE	TRUE	TRUE
chr2	134640000	134650000	10001	*	chr2	134910000	134920000	10001	*	TRUE	TRUE	TRUE
chr2	134920000	134930000	10001	*	chr2	135170000	135180000	10001	*	FALSE	TRUE	FALSE
chr2	134920000	134930000	10001	*	chr2	135870000	135880000	10001	*	TRUE	TRUE	TRUE
chr2	135190000	135200000	10001	*	chr2	135720000	135730000	10001	*	TRUE	TRUE	FALSE
chr2	135190000	135200000	10001	*	chr2	135870000	135880000	10001	*	FALSE	FALSE	TRUE
chr2	135330000	135340000	10001	*	chr2	135740000	135750000	10001	*	FALSE	FALSE	TRUE
chr2	135880000	135890000	10001	*	chr2	136390000	136400000	10001	*	TRUE	TRUE	TRUE
chr2	135880000	135890000	10001	*	chr2	137840000	137850000	10001	*	FALSE	TRUE	FALSE
chr2	136000000	136010000	10001	*	chr2	136370000	136380000	10001	*	TRUE	TRUE	TRUE
chr2	136400000	136410000	10001	*	chr2	137840000	137850000	10001	*	TRUE	FALSE	TRUE
chr2	137850000	137860000	10001	*	chr2	138090000	138100000	10001	*	FALSE	FALSE	TRUE
chr2	137850000	137860000	10001	*	chr2	138830000	138840000	10001	*	TRUE	TRUE	TRUE
chr2	137920000	137930000	10001	*	chr2	138380000	138390000	10001	*	TRUE	TRUE	FALSE
chr2	138100000	138110000	10001	*	chr2	138380000	138390000	10001	*	TRUE	TRUE	TRUE
chr2	138390000	138400000	10001	*	chr2	138780000	138790000	10001	*	TRUE	TRUE	TRUE
chr2	142150000	142160000	10001	*	chr2	142610000	142620000	10001	*	TRUE	TRUE	TRUE
chr2	142620000	142630000	10001	*	chr2	142990000	143000000	10001	*	TRUE	TRUE	TRUE
chr2	142630000	142640000	10001	*	chr2	142880000	142890000	10001	*	TRUE	TRUE	FALSE
chr2	143050000	143060000	10001	*	chr2	143260000	143270000	10001	*	TRUE	TRUE	TRUE
chr2	143060000	143070000	10001	*	chr2	144510000	144520000	10001	*	TRUE	FALSE	FALSE
chr2	143070000	143080000	10001	*	chr2	144400000	144410000	10001	*	FALSE	FALSE	TRUE
chr2	144410000	144420000	10001	*	chr2	146700000	146710000	10001	*	FALSE	FALSE	TRUE
chr2	144520000	144530000	10001	*	chr2	145490000	145500000	10001	*	TRUE	FALSE	FALSE
chr2	144520000	144530000	10001	*	chr2	146660000	146670000	10001	*	TRUE	FALSE	FALSE
chr2	144670000	144680000	10001	*	chr2	145010000	145020000	10001	*	TRUE	FALSE	FALSE
chr2	145020000	145030000	10001	*	chr2	145480000	145490000	10001	*	TRUE	TRUE	FALSE
chr2	145020000	145030000	10001	*	chr2	145750000	145760000	10001	*	FALSE	TRUE	FALSE
chr2	145490000	145500000	10001	*	chr2	145750000	145760000	10001	*	FALSE	TRUE	FALSE
chr2	145770000	145780000	10001	*	chr2	146680000	146690000	10001	*	TRUE	FALSE	TRUE
chr2	146700000	146710000	10001	*	chr2	147040000	147050000	10001	*	TRUE	FALSE	TRUE
chr2	146710000	146720000	10001	*	chr2	146920000	146930000	10001	*	FALSE	TRUE	TRUE
chr2	146710000	146720000	10001	*	chr2	147340000	147350000	10001	*	FALSE	TRUE	FALSE
chr2	146710000	146720000	10001	*	chr2	147920000	147930000	10001	*	TRUE	TRUE	TRUE
chr2	146930000	146940000	10001	*	chr2	147330000	147340000	10001	*	FALSE	TRUE	FALSE
chr2	147040000	147050000	10001	*	chr2	147280000	147290000	10001	*	FALSE	FALSE	TRUE
chr2	147050000	147060000	10001	*	chr2	147340000	147350000	10001	*	TRUE	FALSE	TRUE
chr2	147350000	147360000	10001	*	chr2	147900000	147910000	10001	*	TRUE	TRUE	TRUE
chr2	147930000	147940000	10001	*	chr2	148510000	148520000	10001	*	TRUE	TRUE	TRUE
chr2	147930000	147940000	10001	*	chr2	148990000	149000000	10001	*	TRUE	FALSE	TRUE
chr2	147930000	147940000	10001	*	chr2	149570000	149580000	10001	*	FALSE	TRUE	FALSE
chr2	148520000	148530000	10001	*	chr2	148990000	149000000	10001	*	TRUE	TRUE	TRUE
chr2	148650000	148660000	10001	*	chr2	148990000	149000000	10001	*	FALSE	TRUE	FALSE
chr2	149000000	149010000	10001	*	chr2	149320000	149330000	10001	*	FALSE	TRUE	TRUE
chr2	149000000	149010000	10001	*	chr2	149570000	149580000	10001	*	FALSE	TRUE	TRUE
chr2	149000000	149010000	10001	*	chr2	151590000	151600000	10001	*	FALSE	FALSE	TRUE
chr2	149330000	149340000	10001	*	chr2	149550000	149560000	10001	*	TRUE	TRUE	TRUE
chr2	149570000	149580000	10001	*	chr2	150570000	150580000	10001	*	FALSE	FALSE	TRUE
chr2	149580000	149590000	10001	*	chr2	150480000	150490000	10001	*	TRUE	TRUE	TRUE
chr2	149580000	149590000	10001	*	chr2	151420000	151430000	10001	*	FALSE	TRUE	FALSE
chr2	149580000	149590000	10001	*	chr2	151580000	151590000	10001	*	TRUE	TRUE	FALSE
chr2	150580000	150590000	10001	*	chr2	151560000	151570000	10001	*	FALSE	FALSE	TRUE
chr2	150610000	150620000	10001	*	chr2	151240000	151250000	10001	*	TRUE	FALSE	TRUE
chr2	151250000	151260000	10001	*	chr2	151570000	151580000	10001	*	TRUE	FALSE	TRUE
chr2	151600000	151610000	10001	*	chr2	152020000	152030000	10001	*	TRUE	TRUE	TRUE
chr2	151600000	151610000	10001	*	chr2	152710000	152720000	10001	*	TRUE	TRUE	TRUE
chr2	151790000	151800000	10001	*	chr2	152020000	152030000	10001	*	FALSE	TRUE	FALSE
chr2	152040000	152050000	10001	*	chr2	152690000	152700000	10001	*	TRUE	FALSE	FALSE
chr2	152180000	152190000	10001	*	chr2	152630000	152640000	10001	*	FALSE	TRUE	TRUE
chr2	152180000	152190000	10001	*	chr2	152710000	152720000	10001	*	TRUE	TRUE	TRUE
chr2	152720000	152730000	10001	*	chr2	153520000	153530000	10001	*	TRUE	FALSE	TRUE
chr2	152720000	152730000	10001	*	chr2	154370000	154380000	10001	*	FALSE	FALSE	TRUE
chr2	153530000	153540000	10001	*	chr2	154380000	154390000	10001	*	TRUE	FALSE	TRUE
chr2	154390000	154400000	10001	*	chr2	155320000	155330000	10001	*	TRUE	FALSE	TRUE
chr2	155320000	155330000	10001	*	chr2	157240000	157250000	10001	*	TRUE	TRUE	TRUE
chr2	155380000	155390000	10001	*	chr2	156110000	156120000	10001	*	FALSE	TRUE	FALSE
chr2	155390000	155400000	10001	*	chr2	156050000	156060000	10001	*	FALSE	FALSE	TRUE
chr2	155390000	155400000	10001	*	chr2	156320000	156330000	10001	*	TRUE	FALSE	FALSE
chr2	156060000	156070000	10001	*	chr2	156320000	156330000	10001	*	FALSE	FALSE	TRUE
chr2	156320000	156330000	10001	*	chr2	156590000	156600000	10001	*	TRUE	TRUE	FALSE
chr2	156330000	156340000	10001	*	chr2	157240000	157250000	10001	*	TRUE	FALSE	FALSE
chr2	156410000	156420000	10001	*	chr2	156600000	156610000	10001	*	FALSE	FALSE	TRUE
chr2	156600000	156610000	10001	*	chr2	157240000	157250000	10001	*	TRUE	TRUE	TRUE
chr2	156610000	156620000	10001	*	chr2	156870000	156880000	10001	*	FALSE	FALSE	TRUE
chr2	156880000	156890000	10001	*	chr2	157240000	157250000	10001	*	FALSE	FALSE	TRUE
chr2	157250000	157260000	10001	*	chr2	157480000	157490000	10001	*	TRUE	TRUE	TRUE
chr2	157250000	157260000	10001	*	chr2	158010000	158020000	10001	*	TRUE	TRUE	TRUE
chr2	157250000	157260000	10001	*	chr2	158850000	158860000	10001	*	TRUE	TRUE	TRUE
chr2	157490000	157500000	10001	*	chr2	157780000	157790000	10001	*	TRUE	FALSE	FALSE
chr2	157490000	157500000	10001	*	chr2	158010000	158020000	10001	*	FALSE	FALSE	TRUE
chr2	157790000	157800000	10001	*	chr2	158010000	158020000	10001	*	TRUE	TRUE	FALSE
chr2	158020000	158030000	10001	*	chr2	158440000	158450000	10001	*	TRUE	TRUE	FALSE
chr2	158020000	158030000	10001	*	chr2	158750000	158760000	10001	*	FALSE	FALSE	TRUE
chr2	158020000	158030000	10001	*	chr2	158850000	158860000	10001	*	TRUE	TRUE	TRUE
chr2	158450000	158460000	10001	*	chr2	158840000	158850000	10001	*	TRUE	TRUE	FALSE
chr2	158840000	158850000	10001	*	chr2	161200000	161210000	10001	*	TRUE	FALSE	FALSE
chr2	158870000	158880000	10001	*	chr2	161160000	161170000	10001	*	FALSE	TRUE	FALSE
chr2	158880000	158890000	10001	*	chr2	159120000	159130000	10001	*	FALSE	FALSE	TRUE
chr2	158880000	158890000	10001	*	chr2	159190000	159200000	10001	*	TRUE	TRUE	TRUE
chr2	158880000	158890000	10001	*	chr2	160060000	160070000	10001	*	FALSE	FALSE	TRUE
chr2	159200000	159210000	10001	*	chr2	159720000	159730000	10001	*	FALSE	FALSE	TRUE
chr2	159200000	159210000	10001	*	chr2	160060000	160070000	10001	*	FALSE	FALSE	TRUE
chr2	159730000	159740000	10001	*	chr2	160060000	160070000	10001	*	FALSE	FALSE	TRUE
chr2	159960000	159970000	10001	*	chr2	160970000	160980000	10001	*	TRUE	FALSE	FALSE
chr2	159960000	159970000	10001	*	chr2	161200000	161210000	10001	*	TRUE	FALSE	FALSE
chr2	160070000	160080000	10001	*	chr2	160320000	160330000	10001	*	FALSE	FALSE	TRUE
chr2	160070000	160080000	10001	*	chr2	161210000	161220000	10001	*	FALSE	FALSE	TRUE
chr2	160080000	160090000	10001	*	chr2	160970000	160980000	10001	*	FALSE	TRUE	TRUE
chr2	160090000	160100000	10001	*	chr2	161160000	161170000	10001	*	FALSE	TRUE	FALSE
chr2	160420000	160430000	10001	*	chr2	160960000	160970000	10001	*	FALSE	FALSE	TRUE
chr2	161170000	161180000	10001	*	chr2	161430000	161440000	10001	*	FALSE	TRUE	FALSE
chr2	161170000	161180000	10001	*	chr2	163130000	163140000	10001	*	FALSE	TRUE	FALSE
chr2	161200000	161210000	10001	*	chr2	162310000	162320000	10001	*	TRUE	TRUE	TRUE
chr2	161220000	161230000	10001	*	chr2	161410000	161420000	10001	*	TRUE	FALSE	TRUE
chr2	161220000	161230000	10001	*	chr2	161570000	161580000	10001	*	TRUE	FALSE	TRUE
chr2	161570000	161580000	10001	*	chr2	162150000	162160000	10001	*	FALSE	TRUE	FALSE
chr2	161580000	161590000	10001	*	chr2	161950000	161960000	10001	*	TRUE	FALSE	TRUE
chr2	162320000	162330000	10001	*	chr2	162810000	162820000	10001	*	TRUE	TRUE	TRUE
chr2	162320000	162330000	10001	*	chr2	163130000	163140000	10001	*	TRUE	TRUE	TRUE
chr2	162850000	162860000	10001	*	chr2	163130000	163140000	10001	*	TRUE	TRUE	TRUE
chr2	163140000	163150000	10001	*	chr2	164070000	164080000	10001	*	TRUE	FALSE	FALSE
chr2	163140000	163150000	10001	*	chr2	164720000	164730000	10001	*	TRUE	TRUE	TRUE
chr2	163200000	163210000	10001	*	chr2	163910000	163920000	10001	*	FALSE	TRUE	FALSE
chr2	163200000	163210000	10001	*	chr2	164060000	164070000	10001	*	FALSE	FALSE	TRUE
chr2	163200000	163210000	10001	*	chr2	164440000	164450000	10001	*	FALSE	TRUE	FALSE
chr2	164080000	164090000	10001	*	chr2	164460000	164470000	10001	*	TRUE	TRUE	FALSE
chr2	164480000	164490000	10001	*	chr2	164720000	164730000	10001	*	TRUE	TRUE	TRUE
chr2	164730000	164740000	10001	*	chr2	164920000	164930000	10001	*	TRUE	TRUE	TRUE
chr2	164730000	164740000	10001	*	chr2	164990000	165000000	10001	*	TRUE	TRUE	TRUE
chr2	164730000	164740000	10001	*	chr2	165940000	165950000	10001	*	TRUE	FALSE	FALSE
chr2	164730000	164740000	10001	*	chr2	166410000	166420000	10001	*	FALSE	FALSE	TRUE
chr2	164730000	164740000	10001	*	chr2	166510000	166520000	10001	*	FALSE	TRUE	FALSE
chr2	165000000	165010000	10001	*	chr2	165210000	165220000	10001	*	TRUE	TRUE	TRUE
chr2	165000000	165010000	10001	*	chr2	165340000	165350000	10001	*	FALSE	TRUE	TRUE
chr2	165320000	165330000	10001	*	chr2	165940000	165950000	10001	*	TRUE	FALSE	FALSE
chr2	165340000	165350000	10001	*	chr2	165700000	165710000	10001	*	TRUE	TRUE	FALSE
chr2	165360000	165370000	10001	*	chr2	165880000	165890000	10001	*	FALSE	TRUE	FALSE
chr2	165890000	165900000	10001	*	chr2	166150000	166160000	10001	*	FALSE	TRUE	TRUE
chr2	165890000	165900000	10001	*	chr2	166410000	166420000	10001	*	FALSE	FALSE	TRUE
chr2	165890000	165900000	10001	*	chr2	166510000	166520000	10001	*	FALSE	TRUE	FALSE
chr2	165950000	165960000	10001	*	chr2	166150000	166160000	10001	*	TRUE	FALSE	FALSE
chr2	165950000	165960000	10001	*	chr2	166440000	166450000	10001	*	TRUE	FALSE	FALSE
chr2	165950000	165960000	10001	*	chr2	168120000	168130000	10001	*	TRUE	FALSE	FALSE
chr2	166140000	166150000	10001	*	chr2	166510000	166520000	10001	*	FALSE	TRUE	FALSE
chr2	166170000	166180000	10001	*	chr2	166430000	166440000	10001	*	TRUE	FALSE	TRUE
chr2	166440000	166450000	10001	*	chr2	167220000	167230000	10001	*	TRUE	FALSE	TRUE
chr2	166440000	166450000	10001	*	chr2	168120000	168130000	10001	*	TRUE	FALSE	TRUE
chr2	166520000	166530000	10001	*	chr2	167220000	167230000	10001	*	FALSE	FALSE	TRUE
chr2	166520000	166530000	10001	*	chr2	168120000	168130000	10001	*	FALSE	TRUE	FALSE
chr2	166580000	166590000	10001	*	chr2	167250000	167260000	10001	*	FALSE	TRUE	FALSE
chr2	167230000	167240000	10001	*	chr2	168120000	168130000	10001	*	TRUE	FALSE	FALSE
chr2	168130000	168140000	10001	*	chr2	168340000	168350000	10001	*	TRUE	TRUE	TRUE
chr2	168130000	168140000	10001	*	chr2	168770000	168780000	10001	*	TRUE	TRUE	TRUE
chr2	168130000	168140000	10001	*	chr2	169420000	169430000	10001	*	TRUE	TRUE	TRUE
chr2	168350000	168360000	10001	*	chr2	168770000	168780000	10001	*	TRUE	TRUE	TRUE
chr2	168930000	168940000	10001	*	chr2	169140000	169150000	10001	*	TRUE	TRUE	TRUE
chr2	168930000	168940000	10001	*	chr2	169420000	169430000	10001	*	TRUE	TRUE	TRUE
chr2	169150000	169160000	10001	*	chr2	169420000	169430000	10001	*	TRUE	TRUE	TRUE
chr2	169430000	169440000	10001	*	chr2	169780000	169790000	10001	*	TRUE	TRUE	TRUE
chr2	169430000	169440000	10001	*	chr2	169930000	169940000	10001	*	TRUE	TRUE	TRUE
chr2	169430000	169440000	10001	*	chr2	170920000	170930000	10001	*	TRUE	TRUE	TRUE
chr2	169940000	169950000	10001	*	chr2	170230000	170240000	10001	*	FALSE	FALSE	TRUE
chr2	170210000	170220000	10001	*	chr2	170920000	170930000	10001	*	TRUE	FALSE	FALSE
chr2	170340000	170350000	10001	*	chr2	170920000	170930000	10001	*	FALSE	TRUE	TRUE
chr2	170350000	170360000	10001	*	chr2	170810000	170820000	10001	*	TRUE	TRUE	TRUE
chr2	170930000	170940000	10001	*	chr2	171160000	171170000	10001	*	TRUE	TRUE	FALSE
chr2	170930000	170940000	10001	*	chr2	171430000	171440000	10001	*	TRUE	TRUE	TRUE
chr2	170930000	170940000	10001	*	chr2	171530000	171540000	10001	*	FALSE	FALSE	TRUE
chr2	170930000	170940000	10001	*	chr2	172120000	172130000	10001	*	TRUE	FALSE	FALSE
chr2	170930000	170940000	10001	*	chr2	172710000	172720000	10001	*	FALSE	FALSE	TRUE
chr2	170930000	170940000	10001	*	chr2	172780000	172790000	10001	*	FALSE	TRUE	FALSE
chr2	171170000	171180000	10001	*	chr2	171410000	171420000	10001	*	TRUE	TRUE	FALSE
chr2	171700000	171710000	10001	*	chr2	172120000	172130000	10001	*	TRUE	TRUE	TRUE
chr2	171810000	171820000	10001	*	chr2	172100000	172110000	10001	*	TRUE	TRUE	FALSE
chr2	172130000	172140000	10001	*	chr2	172470000	172480000	10001	*	TRUE	TRUE	TRUE
chr2	172130000	172140000	10001	*	chr2	172710000	172720000	10001	*	TRUE	FALSE	TRUE
chr2	172130000	172140000	10001	*	chr2	172780000	172790000	10001	*	FALSE	TRUE	FALSE
chr2	172130000	172140000	10001	*	chr2	174400000	174410000	10001	*	TRUE	FALSE	FALSE
chr2	172480000	172490000	10001	*	chr2	172710000	172720000	10001	*	TRUE	FALSE	TRUE
chr2	172570000	172580000	10001	*	chr2	172780000	172790000	10001	*	FALSE	TRUE	FALSE
chr2	172720000	172730000	10001	*	chr2	173020000	173030000	10001	*	FALSE	FALSE	TRUE
chr2	172720000	172730000	10001	*	chr2	173220000	173230000	10001	*	FALSE	FALSE	TRUE
chr2	172720000	172730000	10001	*	chr2	174380000	174390000	10001	*	FALSE	FALSE	TRUE
chr2	172790000	172800000	10001	*	chr2	173030000	173040000	10001	*	TRUE	TRUE	FALSE
chr2	172790000	172800000	10001	*	chr2	173210000	173220000	10001	*	FALSE	TRUE	FALSE
chr2	172790000	172800000	10001	*	chr2	174390000	174400000	10001	*	FALSE	TRUE	FALSE
chr2	173030000	173040000	10001	*	chr2	173220000	173230000	10001	*	FALSE	FALSE	TRUE
chr2	173330000	173340000	10001	*	chr2	173840000	173850000	10001	*	FALSE	FALSE	TRUE
chr2	173360000	173370000	10001	*	chr2	174390000	174400000	10001	*	TRUE	TRUE	TRUE
chr2	173380000	173390000	10001	*	chr2	173860000	173870000	10001	*	TRUE	FALSE	FALSE
chr2	173870000	173880000	10001	*	chr2	174080000	174090000	10001	*	TRUE	FALSE	FALSE
chr2	173870000	173880000	10001	*	chr2	174340000	174350000	10001	*	FALSE	TRUE	TRUE
chr2	174400000	174410000	10001	*	chr2	175330000	175340000	10001	*	TRUE	TRUE	TRUE
chr2	174420000	174430000	10001	*	chr2	174690000	174700000	10001	*	TRUE	TRUE	TRUE
chr2	174700000	174710000	10001	*	chr2	175000000	175010000	10001	*	TRUE	TRUE	TRUE
chr2	174700000	174710000	10001	*	chr2	175340000	175350000	10001	*	FALSE	FALSE	TRUE
chr2	174780000	174790000	10001	*	chr2	175000000	175010000	10001	*	TRUE	TRUE	FALSE
chr2	175010000	175020000	10001	*	chr2	175330000	175340000	10001	*	TRUE	TRUE	TRUE
chr2	175340000	175350000	10001	*	chr2	175670000	175680000	10001	*	TRUE	TRUE	TRUE
chr2	175340000	175350000	10001	*	chr2	176090000	176100000	10001	*	TRUE	TRUE	TRUE
chr2	175340000	175350000	10001	*	chr2	177150000	177160000	10001	*	FALSE	TRUE	FALSE
chr2	175680000	175690000	10001	*	chr2	176080000	176090000	10001	*	TRUE	TRUE	TRUE
chr2	176100000	176110000	10001	*	chr2	176640000	176650000	10001	*	TRUE	TRUE	TRUE
chr2	176100000	176110000	10001	*	chr2	177150000	177160000	10001	*	TRUE	TRUE	TRUE
chr2	176100000	176110000	10001	*	chr2	177780000	177790000	10001	*	TRUE	FALSE	FALSE
chr2	176120000	176130000	10001	*	chr2	176450000	176460000	10001	*	FALSE	FALSE	TRUE
chr2	176650000	176660000	10001	*	chr2	177150000	177160000	10001	*	TRUE	TRUE	TRUE
chr2	177160000	177170000	10001	*	chr2	177770000	177780000	10001	*	FALSE	TRUE	TRUE
chr2	177160000	177170000	10001	*	chr2	178690000	178700000	10001	*	FALSE	FALSE	TRUE
chr2	177220000	177230000	10001	*	chr2	177780000	177790000	10001	*	TRUE	FALSE	FALSE
chr2	177430000	177440000	10001	*	chr2	177770000	177780000	10001	*	TRUE	TRUE	TRUE
chr2	177790000	177800000	10001	*	chr2	178070000	178080000	10001	*	TRUE	FALSE	FALSE
chr2	177790000	177800000	10001	*	chr2	178750000	178760000	10001	*	TRUE	FALSE	FALSE
chr2	178070000	178080000	10001	*	chr2	178440000	178450000	10001	*	TRUE	TRUE	FALSE
chr2	178080000	178090000	10001	*	chr2	178690000	178700000	10001	*	FALSE	FALSE	TRUE
chr2	178080000	178090000	10001	*	chr2	178750000	178760000	10001	*	TRUE	FALSE	FALSE
chr2	178460000	178470000	10001	*	chr2	178750000	178760000	10001	*	TRUE	FALSE	FALSE
chr2	178700000	178710000	10001	*	chr2	179080000	179090000	10001	*	FALSE	FALSE	TRUE
chr2	178700000	178710000	10001	*	chr2	179200000	179210000	10001	*	FALSE	FALSE	TRUE
chr2	178700000	178710000	10001	*	chr2	180070000	180080000	10001	*	FALSE	FALSE	TRUE
chr2	178760000	178770000	10001	*	chr2	180090000	180100000	10001	*	TRUE	FALSE	FALSE
chr2	178770000	178780000	10001	*	chr2	179150000	179160000	10001	*	TRUE	TRUE	FALSE
chr2	178930000	178940000	10001	*	chr2	179160000	179170000	10001	*	TRUE	FALSE	FALSE
chr2	179140000	179150000	10001	*	chr2	179750000	179760000	10001	*	FALSE	TRUE	FALSE
chr2	179160000	179170000	10001	*	chr2	179400000	179410000	10001	*	TRUE	TRUE	FALSE
chr2	179380000	179390000	10001	*	chr2	179750000	179760000	10001	*	TRUE	TRUE	TRUE
chr2	179790000	179800000	10001	*	chr2	180090000	180100000	10001	*	TRUE	TRUE	TRUE
chr2	180100000	180110000	10001	*	chr2	180520000	180530000	10001	*	TRUE	TRUE	TRUE
chr2	180100000	180110000	10001	*	chr2	181060000	181070000	10001	*	TRUE	TRUE	TRUE
chr2	180100000	180110000	10001	*	chr2	181730000	181740000	10001	*	TRUE	TRUE	FALSE
chr2	180250000	180260000	10001	*	chr2	180520000	180530000	10001	*	FALSE	FALSE	TRUE
chr2	180530000	180540000	10001	*	chr2	180980000	180990000	10001	*	FALSE	FALSE	TRUE
chr2	181070000	181080000	10001	*	chr2	181720000	181730000	10001	*	TRUE	TRUE	TRUE
chr2	181730000	181740000	10001	*	chr2	182100000	182110000	10001	*	TRUE	TRUE	TRUE
chr2	181740000	181750000	10001	*	chr2	182660000	182670000	10001	*	TRUE	TRUE	FALSE
chr2	181740000	181750000	10001	*	chr2	183120000	183130000	10001	*	TRUE	TRUE	FALSE
chr2	181910000	181920000	10001	*	chr2	182100000	182110000	10001	*	FALSE	FALSE	TRUE
chr2	182110000	182120000	10001	*	chr2	182660000	182670000	10001	*	TRUE	TRUE	TRUE
chr2	182110000	182120000	10001	*	chr2	183130000	183140000	10001	*	FALSE	FALSE	TRUE
chr2	182190000	182200000	10001	*	chr2	182640000	182650000	10001	*	FALSE	FALSE	TRUE
chr2	182670000	182680000	10001	*	chr2	182920000	182930000	10001	*	FALSE	FALSE	TRUE
chr2	182670000	182680000	10001	*	chr2	183120000	183130000	10001	*	TRUE	TRUE	TRUE
chr2	182760000	182770000	10001	*	chr2	183120000	183130000	10001	*	TRUE	FALSE	FALSE
chr2	182900000	182910000	10001	*	chr2	183120000	183130000	10001	*	FALSE	TRUE	FALSE
chr2	183130000	183140000	10001	*	chr2	185270000	185280000	10001	*	TRUE	TRUE	TRUE
chr2	185280000	185290000	10001	*	chr2	185590000	185600000	10001	*	TRUE	TRUE	FALSE
chr2	185280000	185290000	10001	*	chr2	186480000	186490000	10001	*	TRUE	TRUE	TRUE
chr2	185280000	185290000	10001	*	chr2	186840000	186850000	10001	*	FALSE	TRUE	FALSE
chr2	186260000	186270000	10001	*	chr2	186470000	186480000	10001	*	TRUE	FALSE	TRUE
chr2	186470000	186480000	10001	*	chr2	186680000	186690000	10001	*	FALSE	TRUE	FALSE
chr2	186470000	186480000	10001	*	chr2	186840000	186850000	10001	*	FALSE	TRUE	FALSE
chr2	186490000	186500000	10001	*	chr2	186790000	186800000	10001	*	FALSE	FALSE	TRUE
chr2	186490000	186500000	10001	*	chr2	187470000	187480000	10001	*	TRUE	FALSE	TRUE
chr2	186800000	186810000	10001	*	chr2	187480000	187490000	10001	*	FALSE	FALSE	TRUE
chr2	186850000	186860000	10001	*	chr2	187460000	187470000	10001	*	TRUE	TRUE	FALSE
chr2	186850000	186860000	10001	*	chr2	188510000	188520000	10001	*	FALSE	TRUE	FALSE
chr2	187470000	187480000	10001	*	chr2	188510000	188520000	10001	*	TRUE	TRUE	TRUE
chr2	187490000	187500000	10001	*	chr2	187850000	187860000	10001	*	FALSE	FALSE	TRUE
chr2	187490000	187500000	10001	*	chr2	189430000	189440000	10001	*	FALSE	FALSE	TRUE
chr2	187590000	187600000	10001	*	chr2	187850000	187860000	10001	*	TRUE	TRUE	FALSE
chr2	187860000	187870000	10001	*	chr2	188230000	188240000	10001	*	TRUE	FALSE	FALSE
chr2	187860000	187870000	10001	*	chr2	188510000	188520000	10001	*	TRUE	TRUE	TRUE
chr2	188520000	188530000	10001	*	chr2	188980000	188990000	10001	*	FALSE	TRUE	TRUE
chr2	188520000	188530000	10001	*	chr2	189080000	189090000	10001	*	TRUE	FALSE	FALSE
chr2	188520000	188530000	10001	*	chr2	189420000	189430000	10001	*	TRUE	TRUE	TRUE
chr2	188520000	188530000	10001	*	chr2	189650000	189660000	10001	*	TRUE	TRUE	FALSE
chr2	188990000	189000000	10001	*	chr2	189430000	189440000	10001	*	FALSE	FALSE	TRUE
chr2	189090000	189100000	10001	*	chr2	189420000	189430000	10001	*	TRUE	TRUE	FALSE
chr2	189430000	189440000	10001	*	chr2	189650000	189660000	10001	*	TRUE	TRUE	TRUE
chr2	189440000	189450000	10001	*	chr2	190070000	190080000	10001	*	FALSE	FALSE	TRUE
chr2	189440000	189450000	10001	*	chr2	191030000	191040000	10001	*	FALSE	FALSE	TRUE
chr2	189660000	189670000	10001	*	chr2	190080000	190090000	10001	*	TRUE	TRUE	TRUE
chr2	189660000	189670000	10001	*	chr2	191040000	191050000	10001	*	TRUE	TRUE	FALSE
chr2	189790000	189800000	10001	*	chr2	190080000	190090000	10001	*	TRUE	TRUE	FALSE
chr2	190090000	190100000	10001	*	chr2	190310000	190320000	10001	*	TRUE	TRUE	TRUE
chr2	190320000	190330000	10001	*	chr2	190680000	190690000	10001	*	TRUE	TRUE	TRUE
chr2	190320000	190330000	10001	*	chr2	191030000	191040000	10001	*	TRUE	TRUE	TRUE
chr2	190780000	190790000	10001	*	chr2	191030000	191040000	10001	*	TRUE	TRUE	TRUE
chr2	191040000	191050000	10001	*	chr2	191520000	191530000	10001	*	TRUE	TRUE	TRUE
chr2	191040000	191050000	10001	*	chr2	192160000	192170000	10001	*	TRUE	TRUE	TRUE
chr2	191170000	191180000	10001	*	chr2	191520000	191530000	10001	*	TRUE	TRUE	TRUE
chr2	191530000	191540000	10001	*	chr2	191760000	191770000	10001	*	TRUE	TRUE	TRUE
chr2	191530000	191540000	10001	*	chr2	192160000	192170000	10001	*	TRUE	TRUE	TRUE
chr2	191820000	191830000	10001	*	chr2	192160000	192170000	10001	*	TRUE	TRUE	TRUE
chr2	192170000	192180000	10001	*	chr2	193940000	193950000	10001	*	TRUE	TRUE	FALSE
chr2	193620000	193630000	10001	*	chr2	194830000	194840000	10001	*	FALSE	FALSE	TRUE
chr2	193620000	193630000	10001	*	chr2	196060000	196070000	10001	*	FALSE	FALSE	TRUE
chr2	193690000	193700000	10001	*	chr2	193960000	193970000	10001	*	TRUE	FALSE	FALSE
chr2	193700000	193710000	10001	*	chr2	193910000	193920000	10001	*	FALSE	TRUE	FALSE
chr2	193920000	193930000	10001	*	chr2	195300000	195310000	10001	*	FALSE	TRUE	FALSE
chr2	193950000	193960000	10001	*	chr2	196060000	196070000	10001	*	TRUE	TRUE	FALSE
chr2	193980000	193990000	10001	*	chr2	194810000	194820000	10001	*	FALSE	FALSE	TRUE
chr2	194840000	194850000	10001	*	chr2	195320000	195330000	10001	*	TRUE	FALSE	TRUE
chr2	195320000	195330000	10001	*	chr2	195660000	195670000	10001	*	TRUE	TRUE	TRUE
chr2	195320000	195330000	10001	*	chr2	196060000	196070000	10001	*	TRUE	TRUE	TRUE
chr2	195670000	195680000	10001	*	chr2	196060000	196070000	10001	*	TRUE	TRUE	TRUE
chr2	196070000	196080000	10001	*	chr2	196300000	196310000	10001	*	TRUE	TRUE	TRUE
chr2	196070000	196080000	10001	*	chr2	196760000	196770000	10001	*	TRUE	TRUE	TRUE
chr2	196070000	196080000	10001	*	chr2	197780000	197790000	10001	*	TRUE	TRUE	TRUE
chr2	196310000	196320000	10001	*	chr2	196760000	196770000	10001	*	FALSE	FALSE	TRUE
chr2	196470000	196480000	10001	*	chr2	196760000	196770000	10001	*	TRUE	TRUE	FALSE
chr2	196770000	196780000	10001	*	chr2	197010000	197020000	10001	*	TRUE	FALSE	TRUE
chr2	196770000	196780000	10001	*	chr2	197390000	197400000	10001	*	TRUE	TRUE	FALSE
chr2	196770000	196780000	10001	*	chr2	197780000	197790000	10001	*	FALSE	TRUE	FALSE
chr2	197020000	197030000	10001	*	chr2	197380000	197390000	10001	*	FALSE	FALSE	TRUE
chr2	197080000	197090000	10001	*	chr2	197390000	197400000	10001	*	TRUE	FALSE	FALSE
chr2	197180000	197190000	10001	*	chr2	197380000	197390000	10001	*	FALSE	FALSE	TRUE
chr2	197390000	197400000	10001	*	chr2	197780000	197790000	10001	*	TRUE	TRUE	TRUE
chr2	197520000	197530000	10001	*	chr2	197790000	197800000	10001	*	TRUE	FALSE	TRUE
chr2	197790000	197800000	10001	*	chr2	198300000	198310000	10001	*	TRUE	TRUE	TRUE
chr2	198310000	198320000	10001	*	chr2	199470000	199480000	10001	*	TRUE	FALSE	TRUE
chr2	199910000	199920000	10001	*	chr2	200700000	200710000	10001	*	FALSE	FALSE	TRUE
chr2	199910000	199920000	10001	*	chr2	200880000	200890000	10001	*	TRUE	TRUE	FALSE
chr2	199910000	199920000	10001	*	chr2	201220000	201230000	10001	*	FALSE	FALSE	TRUE
chr2	199990000	200000000	10001	*	chr2	200300000	200310000	10001	*	TRUE	TRUE	FALSE
chr2	199990000	200000000	10001	*	chr2	200480000	200490000	10001	*	TRUE	TRUE	TRUE
chr2	200490000	200500000	10001	*	chr2	200710000	200720000	10001	*	TRUE	TRUE	TRUE
chr2	200890000	200900000	10001	*	chr2	201180000	201190000	10001	*	TRUE	TRUE	TRUE
chr2	200890000	200900000	10001	*	chr2	202260000	202270000	10001	*	TRUE	TRUE	FALSE
chr2	201230000	201240000	10001	*	chr2	202550000	202560000	10001	*	FALSE	FALSE	TRUE
chr2	201240000	201250000	10001	*	chr2	201650000	201660000	10001	*	TRUE	FALSE	FALSE
chr2	201240000	201250000	10001	*	chr2	201780000	201790000	10001	*	FALSE	TRUE	TRUE
chr2	201390000	201400000	10001	*	chr2	201780000	201790000	10001	*	FALSE	TRUE	FALSE
chr2	201400000	201410000	10001	*	chr2	201650000	201660000	10001	*	TRUE	FALSE	TRUE
chr2	201790000	201800000	10001	*	chr2	202180000	202190000	10001	*	TRUE	TRUE	TRUE
chr2	201790000	201800000	10001	*	chr2	202260000	202270000	10001	*	TRUE	TRUE	FALSE
chr2	202190000	202200000	10001	*	chr2	202550000	202560000	10001	*	FALSE	FALSE	TRUE
chr2	202270000	202280000	10001	*	chr2	202550000	202560000	10001	*	TRUE	TRUE	TRUE
chr2	202270000	202280000	10001	*	chr2	203910000	203920000	10001	*	TRUE	TRUE	FALSE
chr2	202560000	202570000	10001	*	chr2	202870000	202880000	10001	*	TRUE	TRUE	TRUE
chr2	202560000	202570000	10001	*	chr2	203190000	203200000	10001	*	FALSE	FALSE	TRUE
chr2	202560000	202570000	10001	*	chr2	203910000	203920000	10001	*	FALSE	FALSE	TRUE
chr2	202880000	202890000	10001	*	chr2	203170000	203180000	10001	*	TRUE	TRUE	TRUE
chr2	203200000	203210000	10001	*	chr2	203460000	203470000	10001	*	TRUE	TRUE	TRUE
chr2	203470000	203480000	10001	*	chr2	203820000	203830000	10001	*	TRUE	TRUE	TRUE
chr2	203470000	203480000	10001	*	chr2	203910000	203920000	10001	*	FALSE	FALSE	TRUE
chr2	203920000	203930000	10001	*	chr2	204310000	204320000	10001	*	TRUE	FALSE	FALSE
chr2	203920000	203930000	10001	*	chr2	205960000	205970000	10001	*	TRUE	TRUE	TRUE
chr2	204330000	204340000	10001	*	chr2	204550000	204560000	10001	*	TRUE	FALSE	TRUE
chr2	204330000	204340000	10001	*	chr2	204700000	204710000	10001	*	TRUE	TRUE	TRUE
chr2	205300000	205310000	10001	*	chr2	205680000	205690000	10001	*	TRUE	TRUE	TRUE
chr2	205690000	205700000	10001	*	chr2	205960000	205970000	10001	*	TRUE	TRUE	TRUE
chr2	205970000	205980000	10001	*	chr2	206160000	206170000	10001	*	TRUE	TRUE	TRUE
chr2	205970000	205980000	10001	*	chr2	206680000	206690000	10001	*	TRUE	TRUE	TRUE
chr2	205970000	205980000	10001	*	chr2	208360000	208370000	10001	*	TRUE	TRUE	TRUE
chr2	206170000	206180000	10001	*	chr2	206680000	206690000	10001	*	TRUE	TRUE	TRUE
chr2	206770000	206780000	10001	*	chr2	206970000	206980000	10001	*	TRUE	FALSE	FALSE
chr2	206770000	206780000	10001	*	chr2	208360000	208370000	10001	*	FALSE	TRUE	FALSE
chr2	206780000	206790000	10001	*	chr2	207480000	207490000	10001	*	FALSE	TRUE	TRUE
chr2	206980000	206990000	10001	*	chr2	207480000	207490000	10001	*	TRUE	FALSE	TRUE
chr2	207170000	207180000	10001	*	chr2	207470000	207480000	10001	*	TRUE	FALSE	FALSE
chr2	207490000	207500000	10001	*	chr2	207740000	207750000	10001	*	TRUE	TRUE	TRUE
chr2	207750000	207760000	10001	*	chr2	208070000	208080000	10001	*	TRUE	FALSE	TRUE
chr2	207750000	207760000	10001	*	chr2	208360000	208370000	10001	*	TRUE	TRUE	TRUE
chr2	208090000	208100000	10001	*	chr2	208360000	208370000	10001	*	TRUE	FALSE	FALSE
chr2	208160000	208170000	10001	*	chr2	208360000	208370000	10001	*	FALSE	FALSE	TRUE
chr2	208370000	208380000	10001	*	chr2	209210000	209220000	10001	*	FALSE	FALSE	TRUE
chr2	208370000	208380000	10001	*	chr2	209290000	209300000	10001	*	TRUE	FALSE	FALSE
chr2	208370000	208380000	10001	*	chr2	209960000	209970000	10001	*	TRUE	TRUE	TRUE
chr2	208430000	208440000	10001	*	chr2	209230000	209240000	10001	*	FALSE	TRUE	FALSE
chr2	209300000	209310000	10001	*	chr2	209560000	209570000	10001	*	TRUE	TRUE	TRUE
chr2	209300000	209310000	10001	*	chr2	209960000	209970000	10001	*	TRUE	TRUE	TRUE
chr2	209570000	209580000	10001	*	chr2	209960000	209970000	10001	*	TRUE	TRUE	TRUE
chr2	209970000	209980000	10001	*	chr2	210190000	210200000	10001	*	TRUE	TRUE	TRUE
chr2	209970000	209980000	10001	*	chr2	211030000	211040000	10001	*	TRUE	FALSE	FALSE
chr2	209970000	209980000	10001	*	chr2	211170000	211180000	10001	*	FALSE	FALSE	TRUE
chr2	209970000	209980000	10001	*	chr2	212570000	212580000	10001	*	FALSE	TRUE	FALSE
chr2	210210000	210220000	10001	*	chr2	210410000	210420000	10001	*	TRUE	TRUE	FALSE
chr2	210420000	210430000	10001	*	chr2	211170000	211180000	10001	*	FALSE	FALSE	TRUE
chr2	210490000	210500000	10001	*	chr2	211030000	211040000	10001	*	TRUE	FALSE	FALSE
chr2	211040000	211050000	10001	*	chr2	212560000	212570000	10001	*	TRUE	FALSE	FALSE
chr2	211180000	211190000	10001	*	chr2	211710000	211720000	10001	*	FALSE	FALSE	TRUE
chr2	211180000	211190000	10001	*	chr2	212570000	212580000	10001	*	FALSE	FALSE	TRUE
chr2	211700000	211710000	10001	*	chr2	212570000	212580000	10001	*	FALSE	TRUE	TRUE
chr2	211930000	211940000	10001	*	chr2	212560000	212570000	10001	*	TRUE	FALSE	FALSE
[truncated: 11,232 more rows]
