# Supplementary material for: Genome reorganization and its functional impact during breast cancer progression
Source: bioRxiv preprint, doi:10.1101/2025.05.14.654144, version 5 (2026-05-23)
Supplement: Supplemental Table 6 [file 654144_file24.xlsx]

## Sheet: TableS6-diffGenes
seqnames	start	end	width	strand	SYMBOL	GENEBIOTYPE	GENEID	DESEQID	baseMean	AC.log2FoldChange	AT.log2FoldChange	TC.log2FoldChange	AC.padj	AT.padj	TC.padj	AC.sig	AT.sig	TC.sig	cluster	MCF10A_R1	MCF10A_R2	MCF10A_R3	MCF10AT1_R1	MCF10AT1_R2	MCF10AT1_R3	MCF10CA1a_R1	MCF10CA1a_R2	MCF10CA1a_R3	A_ZSCR	T_ZSCR	C_ZSCR	A_VST	T_VST	C_VST
chrX	100627108	100639991	12884	-	TSPAN6	protein_coding	ENSG00000000003	ENSG00000000003.15	875.87	0.349378	-0.293041	0.678546	0.0283391	0.0603689	7.68881e-06	FALSE	FALSE	TRUE	up.late	709	882	1019	553	825	701	1097	1120	962	-0.037569	-1.05801	1.09558	9.96391	9.66034	10.301
chr1	169849631	169894267	44637	-	SCYL3	protein_coding	ENSG00000000457	ENSG00000000457.14	483.538	-0.447595	-0.432113	0.00869618	0.00958875	0.00953935	0.979796	TRUE	TRUE	FALSE	down.early	445	661	703	418	466	423	385	487	383	1.16941	-0.596178	-0.573237	9.54903	9.14563	9.15087
chr1	169662007	169854080	192074	+	C1orf112	protein_coding	ENSG00000000460	ENSG00000000460.17	1079.13	0.220368	-0.417944	0.677675	0.234993	0.012604	5.2148e-05	FALSE	FALSE	TRUE	up.late	1085	1117	1116	566	1201	770	1089	1374	1444	0.203857	-1.13037	0.926512	10.2994	9.8605	10.5371
chr1	196652043	196747504	95462	+	CFH	protein_coding	ENSG00000000971	ENSG00000000971.16	293.765	5.73586	7.31504	-1.57729	1.19275e-31	7.51234e-52	3.21492e-12	TRUE	TRUE	TRUE	up.early	6	5	0	619	813	921	180	189	179	-1.22295	1.04953	0.173421	6.54742	9.6561	8.45761
chr6	143494812	143511720	16909	-	FUCA2	protein_coding	ENSG00000001036	ENSG00000001036.14	3788.07	-0.28896	-0.17919	-0.0932052	0.00950948	0.128836	0.500574	TRUE	FALSE	FALSE	down.early	3414	4408	4940	3364	4414	3530	3066	3731	3460	1.17455	-0.223637	-0.95091	12.1019	11.9078	11.8068
chr6	53497341	53616970	119630	-	GCLC	protein_coding	ENSG00000001084	ENSG00000001084.13	2296.57	0.426355	0.389884	0.0128037	0.00385698	0.00670583	0.959616	TRUE	TRUE	FALSE	up.early	1581	1922	2108	2236	2949	2652	2331	2673	2248	-1.17601	0.554227	0.621785	10.9567	11.375	11.3913
chr6	41072945	41099976	27032	+	NFYA	protein_coding	ENSG00000001167	ENSG00000001167.14	1098.33	0.501112	0.402299	0.0553697	0.00451202	0.0188172	0.817836	TRUE	FALSE	FALSE	up.early	708	847	941	941	1661	1101	1056	1412	1336	-1.09574	0.400872	0.694866	9.96341	10.3737	10.4543
chr1	24415802	24472976	57175	+	NIPAL3	protein_coding	ENSG00000001461	ENSG00000001461.17	3192.24	0.522887	0.0406618	0.452276	0.000376632	0.84513	0.00176225	TRUE	FALSE	TRUE	up.late	2135	2845	3491	2877	3825	3093	3106	4126	3120	-0.69397	-0.507689	1.20166	11.4856	11.5384	12.0234
chr6	46129989	46146688	16700	+	ENPP4	protein_coding	ENSG00000001561	ENSG00000001561.7	183.105	2.31239	-1.5503	3.98379	9.41062e-22	6.13781e-08	1.22135e-47	TRUE	TRUE	TRUE	up.late	70	69	116	27	23	32	420	456	426	-0.310202	-0.960765	1.27097	7.72188	7.11975	9.18534
chr3	50155045	50189075	34031	+	SEMA3F	protein_coding	ENSG00000001617	ENSG00000001617.12	2898.91	-0.491157	0.888229	-1.49677	0.0115996	4.23825e-06	3.62506e-14	FALSE	TRUE	TRUE	down.late	1629	2851	2648	5122	4697	4291	1662	1923	1337	-0.200348	1.18644	-0.986089	11.3004	12.2297	10.7739
chr7	92245974	92401383	155410	+	ANKIB1	protein_coding	ENSG00000001629	ENSG00000001629.10	3522.95	-0.429538	-0.628527	0.170525	0.022514	0.000571261	0.399419	FALSE	TRUE	FALSE	down.early	3501	4682	5405	2245	3198	2758	3170	3498	3251	1.06958	-0.863018	-0.206564	12.1962	11.4865	11.7275
chr7	92112153	92134803	22651	-	CYP51A1	protein_coding	ENSG00000001630	ENSG00000001630.17	8116.62	-1.19126	-0.28471	-0.864191	6.74948e-25	0.0186974	1.09931e-13	TRUE	FALSE	TRUE	down.late	9300	11459	12026	8751	9414	8432	4146	5140	4682	0.929334	0.346913	-1.27625	13.4314	13.1175	12.2426
chr7	92198969	92246166	47198	-	KRIT1	protein_coding	ENSG00000001631	ENSG00000001631.16	811.052	-1.23599	-0.894302	-0.26296	3.40267e-13	1.45488e-07	0.137215	TRUE	TRUE	FALSE	down.early	931	1383	1507	455	694	687	477	607	605	1.25609	-0.376863	-0.879224	10.4673	9.63024	9.37273
chr7	99238829	99311130	72302	+	MYH16	transcribed_unitary_pseudogene	ENSG00000002079	ENSG00000002079.14	124.853	-0.050458	-1.07716	1.01129	0.855215	2.27743e-06	1.13849e-05	FALSE	TRUE	TRUE	up.late	163	163	171	63	91	62	132	154	122	0.708538	-1.28456	0.576021	8.18414	7.59415	8.14492
chrY	2691187	2741309	50123	+	NA	NA	NA	ENSG00000002586.20_PAR_Y	2525.64	-0.413929	0.444536	-0.987529	0.0628053	0.0334792	1.14856e-05	FALSE	FALSE	TRUE	down.late	1534	2846	2964	3673	2758	3951	1681	1749	1553	-0.0534292	1.00579	-0.952357	11.2793	11.8123	10.8269
chr4	11393150	11429564	36415	-	HS3ST1	protein_coding	ENSG00000002587	ENSG00000002587.10	692.554	1.68407	-0.569597	2.34601	1.12287e-22	0.00108279	3.88834e-41	TRUE	TRUE	TRUE	up.late	371	483	441	226	344	213	1328	1628	1299	-0.367674	-0.913718	1.28139	9.14517	8.66968	10.5812
chr7	150824627	150861504	36878	+	AOC1	protein_coding	ENSG00000002726	ENSG00000002726.21	22.0727	-2.1078	-3.6151	0.640933	3.71261e-05	3.15242e-07	0.112201	TRUE	TRUE	FALSE	down.early	87	56	59	1	4	3	12	16	7	1.23105	-0.873801	-0.357244	7.41921	6.59111	6.79433
chr7	121325367	121341104	15738	+	WNT16	protein_coding	ENSG00000002745	ENSG00000002745.13	2.96144	0.846018	-0.387813	3.09288	0.115346	0.31279	0.00540503	FALSE	FALSE	TRUE	up.late	1	1	1	0	0	0	6	11	6	-0.153887	-1.00699	1.16088	6.45683	6.28361	6.72379
chr7	43112629	43566001	453373	+	HECW1	protein_coding	ENSG00000002746	ENSG00000002746.15	11.6316	-4.42946	-0.283966	-3.07479	1.43662e-05	0.406649	0.00104424	TRUE	FALSE	TRUE	down.early	8	12	12	9	7	10	0	3	2	0.850841	0.211132	-1.06197	7.01829	6.8064	6.38472
chr2	72129238	72148038	18801	-	CYP26B1	protein_coding	ENSG00000003137	ENSG00000003137.8	516.452	0.920295	1.85733	-0.695666	0.000206376	1.51908e-12	0.00322381	TRUE	TRUE	TRUE	up.early	123	182	269	1064	963	757	408	501	636	-1.10189	1.06708	0.0348106	8.48622	9.95162	9.2542
chr7	8113184	8262687	149504	-	ICA1	protein_coding	ENSG00000003147	ENSG00000003147.19	624.017	-0.289037	-1.83685	1.46175	0.221229	3.11365e-14	1.92005e-09	FALSE	TRUE	TRUE	down.early	803	944	961	232	299	239	693	757	560	0.854953	-1.2342	0.379247	10.0504	8.5854	9.71684
chr16	90004871	90019890	15020	-	DBNDD1	protein_coding	ENSG00000003249	ENSG00000003249.15	1211.99	-0.353116	-1.84016	1.43767	0.0385188	6.47087e-28	1.9709e-17	FALSE	TRUE	TRUE	down.early	1590	1886	1826	383	617	499	1222	1642	1236	0.886657	-1.28067	0.394017	10.9202	9.30511	10.5531
chr2	187464230	187565760	101531	-	TFPI	protein_coding	ENSG00000003436	ENSG00000003436.16	952.843	3.46815	3.30436	0.053116	1.02736e-11	9.09535e-11	0.886382	TRUE	TRUE	FALSE	up.early	56	89	260	870	1440	1794	1355	1562	988	-1.27617	0.576537	0.699631	7.91094	10.4369	10.6047
chr2	37231631	37253403	21773	+	NDUFAF7	protein_coding	ENSG00000003509	ENSG00000003509.16	665.512	1.10254	0.313136	0.689892	8.44829e-11	0.06669	3.68841e-05	TRUE	FALSE	TRUE	up.late	349	476	515	490	691	543	939	1056	937	-0.951755	-0.2597	1.21145	9.18949	9.49255	10.1368
chr3	50088919	50119021	30103	+	RBM5	protein_coding	ENSG00000003756	ENSG00000003756.17	2591.33	-0.6359	0.0385738	-0.669929	3.91623e-07	0.834511	6.41689e-08	TRUE	FALSE	TRUE	down.late	2454	2890	3161	3022	3598	3074	1480	1947	1935	0.58062	0.711741	-1.29236	11.5855	11.6298	10.9536
chr8	17497088	17570573	73486	+	SLC7A2	protein_coding	ENSG00000003989	ENSG00000003989.18	178.564	0.357348	6.51762	-5.83384	0.327849	4.94242e-41	1.10557e-41	FALSE	TRUE	TRUE	down.late	8	6	2	320	675	440	5	6	16	-0.694808	1.31743	-0.622618	6.6445	9.35555	6.74176
chr7	127588386	127591700	3315	+	ARF5	protein_coding	ENSG00000004059	ENSG00000004059.11	5001.53	-0.941825	-0.725408	-0.155914	1.34873e-07	4.95925e-05	0.438982	TRUE	TRUE	FALSE	down.early	5290	9039	7721	4845	4166	3496	3805	4040	2954	1.21193	-0.407303	-0.804628	12.8498	12.0565	11.8618
chr3	129555214	129606676	51463	-	PLXND1	protein_coding	ENSG00000004399	ENSG00000004399.13	520.095	1.91792	2.08686	-0.129022	1.44331e-24	7.85891e-29	0.52314	TRUE	TRUE	FALSE	up.early	99	139	131	856	964	862	630	893	718	-1.31205	0.745592	0.566458	8.25029	9.78079	9.64755
chr1	23019443	23083689	64247	+	KDM1A	protein_coding	ENSG00000004487	ENSG00000004487.17	6781.68	-0.784516	-0.295062	-0.43973	4.97239e-11	0.0172197	0.000280778	TRUE	FALSE	TRUE	down.early	7633	8849	8992	6223	8627	6273	4377	5241	5033	1.05232	0.131905	-1.18422	13.0955	12.7685	12.3009
chr17	3860315	3894891	34577	-	CAMKK1	protein_coding	ENSG00000004660	ENSG00000004660.15	734.55	0.813353	0.926452	-0.0826427	1.10805e-05	7.28333e-07	0.723085	TRUE	TRUE	FALSE	up.early	404	455	500	1072	818	860	802	945	744	-1.22885	0.712763	0.516084	9.22523	10.0308	9.94916
chr7	93232340	93361123	128784	+	VPS50	protein_coding	ENSG00000004766	ENSG00000004766.17	869.47	-1.18957	-1.04369	-0.0999624	5.98416e-09	3.95114e-07	0.681379	TRUE	TRUE	FALSE	down.early	1156	1465	1572	487	823	632	556	503	648	1.24991	-0.515611	-0.734295	10.5931	9.60531	9.48295
chr7	95583499	95596516	13018	-	PDK4	protein_coding	ENSG00000004799	ENSG00000004799.8	388.15	-1.98128	-0.232235	-1.6263	2.03797e-15	0.300469	1.08248e-10	TRUE	FALSE	TRUE	down.late	445	479	738	323	433	570	162	157	128	0.829187	0.417564	-1.24675	9.47693	9.20177	8.08922
chr3	50341110	50345732	4623	-	ZMYND10	protein_coding	ENSG00000004838	ENSG00000004838.14	15.6258	-0.991631	0.184605	-1.63781	0.0345656	0.570943	0.004975	FALSE	FALSE	TRUE	down.late	19	20	22	37	16	17	4	6	3	0.286735	0.769824	-1.05656	6.95025	7.05834	6.64968
chrX	25003694	25016420	12727	-	ARX	protein_coding	ENSG00000004848	ENSG00000004848.8	10.1496	-6.38169	-6.23627	0	5.66775e-07	6.4328e-07	1	TRUE	TRUE	FALSE	down.early	28	32	30	0	0	0	0	0	0	1.33086	-0.66543	-0.66543	7.17025	6.28361	6.28361
chr7	96120220	96322147	201928	-	SLC25A13	protein_coding	ENSG00000004864	ENSG00000004864.14	2174.84	-0.715055	-0.355083	-0.278446	1.57399e-05	0.0307357	0.10337	TRUE	FALSE	FALSE	down.early	2545	3075	2876	1824	2545	1952	1308	1620	1923	1.07613	-0.0637839	-1.01235	11.5272	11.1247	10.7897
chr7	116953238	117230176	276939	+	ST7	protein_coding	ENSG00000004866	ENSG00000004866.22	491.247	-1.6265	-0.372267	-1.17848	3.65947e-23	0.0174018	1.58626e-12	TRUE	FALSE	TRUE	down.late	712	759	784	392	713	572	189	209	234	0.957339	0.302136	-1.25948	9.75857	9.39209	8.51864
chr16	2852730	2858170	5441	-	PRSS22	protein_coding	ENSG00000005001	ENSG00000005001.10	665.367	0.57166	-3.37092	4.05619	0.0091971	3.21388e-42	4.7458e-61	TRUE	TRUE	TRUE	up.late	594	789	750	86	78	56	1239	1535	805	0.428471	-1.29248	0.864013	9.79764	7.59821	10.3543
chr7	26667068	26995239	328172	-	SKAP2	protein_coding	ENSG00000005020	ENSG00000005020.13	1781.52	-0.853131	-0.86371	0.0117009	0.00023745	0.00022544	0.976497	TRUE	TRUE	FALSE	down.early	2045	2514	3434	940	1621	1429	1214	1561	1266	1.13994	-0.620666	-0.519277	11.4344	10.4942	10.5483
chr7	27181157	27185232	4076	-	HOXA11	protein_coding	ENSG00000005073	ENSG00000005073.6	59.2259	2.36514	-6.25753	8.53726	1.77917e-09	7.42957e-08	6.865e-14	TRUE	TRUE	TRUE	up.late	35	19	23	0	0	0	120	158	174	-0.0898504	-1.09553	1.18538	7.10677	6.28361	8.15057
chr17	5440917	5468982	28066	-	DHX33	protein_coding	ENSG00000005100	ENSG00000005100.13	2159.53	0.337395	0.465425	-0.124345	0.0409141	0.00289387	0.51081	FALSE	TRUE	FALSE	up.early	1486	1814	1766	2184	3170	2230	1856	2451	2635	-1.08123	0.842644	0.238583	10.8737	11.3736	11.2166
chr7	11370365	11832198	461834	-	THSD7A	protein_coding	ENSG00000005108	ENSG00000005108.16	11.7736	-3.00354	-4.58655	0.420367	0.00042485	7.30973e-05	0.291506	TRUE	TRUE	FALSE	down.early	12	11	13	0	1	1	5	5	5	1.10354	-0.698647	-0.404893	7.12303	6.42007	6.53465
chr17	34980512	35009743	29232	+	LIG3	protein_coding	ENSG00000005156	ENSG00000005156.12	2505.37	0.566275	0.0431043	0.497124	2.26149e-05	0.823106	0.000164829	TRUE	FALSE	TRUE	up.late	1763	2323	2318	1807	2964	2075	2768	3654	3027	-0.714533	-0.540852	1.25539	11.1442	11.1942	11.7117
chr16	20610243	20797581	187339	+	ACSM3	protein_coding	ENSG00000005187	ENSG00000005187.12	65.4065	1.60813	0.221321	1.0817	2.19902e-05	0.444823	0.00241591	TRUE	FALSE	TRUE	up.late	26	30	46	35	49	41	154	160	66	-0.770952	-0.356017	1.12697	7.20405	7.3614	7.92376
chr16	20806429	20849665	43237	+	REXO5	protein_coding	ENSG00000005189	ENSG00000005189.20	473.575	-0.160715	-0.820011	0.606263	0.439914	8.46015e-06	0.000761709	FALSE	TRUE	TRUE	down.early	512	670	575	253	408	278	501	676	435	0.833892	-1.20782	0.373929	9.52436	8.82945	9.36781
chr16	57428187	57447420	19234	-	CIAPIN1	protein_coding	ENSG00000005194	ENSG00000005194.15	2534.85	-0.67012	-0.135849	-0.449534	0.000755578	0.534887	0.0196338	TRUE	FALSE	FALSE	down.late	2719	3445	3076	3043	2944	2249	1561	1762	1973	0.803775	0.252941	-1.05672	11.6552	11.4443	10.943
chr9	35104112	35116341	12230	-	ATOSB	protein_coding	ENSG00000005238	ENSG00000005238.20	1897.15	0.611014	0.275564	0.254058	0.000604314	0.122019	0.164729	TRUE	FALSE	FALSE	up.early	1039	1507	1740	1760	2424	1664	2334	3010	1862	-0.990788	0.0436441	0.947143	10.655	10.9835	11.2705
chr7	107044705	107161811	117107	+	PRKAR2B	protein_coding	ENSG00000005249	ENSG00000005249.13	56.8992	2.32397	0.0430367	2.223	5.96982e-12	0.897371	2.77264e-11	TRUE	FALSE	TRUE	up.late	19	18	32	25	27	23	128	139	100	-0.687	-0.624985	1.31198	7.05362	7.0827	7.99084
chr16	3725054	3880713	155660	-	CREBBP	protein_coding	ENSG00000005339	ENSG00000005339.15	3091.48	-0.954405	-0.376849	-0.445636	1.03866e-06	0.0465342	0.0187335	TRUE	FALSE	FALSE	down.early	3453	3573	4639	2374	4148	3432	1595	2171	2384	1.01179	0.0559975	-1.06778	12.0866	11.6221	11.0761
chr2	75652000	75710985	58986	-	GCFC2	protein_coding	ENSG00000005436	ENSG00000005436.14	591.952	1.89637	1.13725	0.669833	5.14572e-33	1.29148e-12	1.0934e-05	TRUE	TRUE	TRUE	up.early	239	291	301	421	699	628	803	941	861	-1.20281	0.128533	1.07428	8.61371	9.48617	10.1059
chr2	74421678	74425755	4078	+	WDR54	protein_coding	ENSG00000005448	ENSG00000005448.17	1127.61	0.785577	0.661317	0.0973795	7.16819e-09	1.27148e-06	0.575207	TRUE	TRUE	FALSE	up.early	575	825	895	1093	1474	1277	1319	1511	1268	-1.28058	0.486067	0.79451	9.83759	10.4541	10.5617
chr7	87345664	87399794	54131	+	CROT	protein_coding	ENSG00000005469	ENSG00000005469.12	489.018	-1.03217	-0.16083	-0.804369	1.16785e-08	0.408026	8.90788e-06	TRUE	FALSE	TRUE	down.late	495	589	810	545	686	532	201	303	336	0.825875	0.418486	-1.24436	9.59559	9.43095	8.75897
chr7	105014190	105115019	100830	+	KMT2E	protein_coding	ENSG00000005483	ENSG00000005483.21	1723	-1.34268	-0.499258	-0.782998	1.10583e-26	6.95661e-05	5.66673e-10	TRUE	TRUE	TRUE	down.early	2032	2410	2940	1259	2236	2052	808	1016	1010	1.06653	0.140805	-1.20733	11.3676	10.8612	10.1237
chr7	75842602	75888926	46325	+	RHBDD2	protein_coding	ENSG00000005486	ENSG00000005486.17	1580.25	-1.10322	-0.408504	-0.640659	6.51174e-21	0.000584511	6.51335e-08	TRUE	TRUE	TRUE	down.early	1645	2493	2415	1600	1705	1509	889	1041	1030	1.06496	0.144873	-1.20983	11.1776	10.7631	10.1527
chr6	82169986	82247754	77769	-	IBTK	protein_coding	ENSG00000005700	ENSG00000005700.15	2888.94	0.164312	-0.29507	0.476475	0.317088	0.043369	0.000805447	FALSE	FALSE	TRUE	up.late	2349	2943	3551	1769	2885	2594	3175	3795	3132	0.210815	-1.11765	0.906833	11.6057	11.2666	11.7834
chr13	76992598	77027195	34598	-	FBXL3	protein_coding	ENSG00000005812	ENSG00000005812.11	1213.34	-0.379788	0.175667	-0.568384	0.00541225	0.230098	1.35008e-05	TRUE	FALSE	TRUE	down.late	1056	1351	1495	1143	1553	1552	927	962	932	0.231664	0.964276	-1.19594	10.4537	10.6403	10.09
chr17	50094737	50112152	17416	+	PDK2	protein_coding	ENSG00000005882	ENSG00000005882.12	366.727	0.582598	0.997819	-0.275639	0.0194379	0.000107222	0.24085	FALSE	TRUE	FALSE	up.early	125	218	289	580	502	560	374	428	301	-1.05336	0.914081	0.139276	8.48575	9.33293	8.9993
chr17	50055968	50090481	34514	+	ITGA3	protein_coding	ENSG00000005884	ENSG00000005884.18	42002.6	1.17265	0.962134	0.162734	4.301e-13	3.45226e-09	0.375517	TRUE	TRUE	FALSE	up.early	17033	26211	26523	50020	49386	42900	52750	64598	51534	-1.26361	0.44387	0.819743	14.5264	15.5259	15.7459
chrX	24149173	24216255	67083	+	ZFX	protein_coding	ENSG00000005889	ENSG00000005889.16	2278.55	-0.183999	0.203871	-0.399132	0.265691	0.193592	0.00647953	FALSE	FALSE	TRUE	down.late	1943	2259	2672	2281	3239	2717	1633	2071	1869	-0.063029	1.00807	-0.945039	11.2189	11.4553	11.0242
chr16	19501693	19522123	20431	-	GDE1	protein_coding	ENSG00000006007	ENSG00000006007.12	3426.52	-0.960501	-1.02314	0.0480066	5.5225e-12	3.36063e-13	0.817828	TRUE	TRUE	FALSE	down.early	4213	5223	5892	2280	3007	2472	2082	2685	2990	1.29979	-0.694274	-0.605513	12.3855	11.3672	11.4125
chr19	18572220	18607741	35522	-	CRLF1	protein_coding	ENSG00000006016	ENSG00000006016.11	19.0531	2.03474	1.47626	0.130079	0.000721805	0.00566818	0.706253	TRUE	TRUE	FALSE	up.early	8	7	7	28	21	18	14	18	17	-1.05307	0.297092	0.755982	6.64701	7.01851	7.14477
chr17	47807372	47821834	14463	-	OSBPL7	protein_coding	ENSG00000006025	ENSG00000006025.12	753.304	-0.0448057	-0.960388	0.901737	0.858219	4.20675e-07	2.03252e-06	FALSE	TRUE	TRUE	up.late	631	1120	1053	481	576	452	683	901	812	0.655032	-1.23517	0.58014	10.0476	9.2164	10.0147
chr17	32927910	32945106	17197	+	TMEM98	protein_coding	ENSG00000006042	ENSG00000006042.12	136.165	-1.30982	0.438359	-2.07733	5.24552e-05	0.0930953	1.0027e-09	TRUE	FALSE	TRUE	down.late	133	135	116	229	289	189	42	42	54	0.183082	0.97451	-1.15759	8.07427	8.48234	7.38298
chr17	7288263	7294639	6377	-	YBX2	protein_coding	ENSG00000006047	ENSG00000006047.13	99.3976	-2.56849	-4.55024	1.60842	8.27917e-09	3.40068e-19	0.000830038	TRUE	TRUE	TRUE	down.early	104	243	297	8	12	11	60	55	19	1.23067	-0.879786	-0.350884	8.56113	6.80672	7.24639
chr11	17392498	17476879	84382	-	ABCC8	protein_coding	ENSG00000006071	ENSG00000006071.15	4.53592	0.466768	-0.531852	2.50138	0.291221	0.204152	0.00987135	FALSE	FALSE	TRUE	up.late	2	0	2	1	1	0	10	11	3	-0.117076	-0.761202	0.878278	6.51409	6.35777	6.75565
chr11	60924460	60937159	12700	+	TMEM132A	protein_coding	ENSG00000006118	ENSG00000006118.15	1822.41	1.17595	-0.141736	1.36899	7.09372e-16	0.406767	1.86436e-20	TRUE	FALSE	TRUE	up.late	1018	1452	1575	1429	1257	1002	2723	3106	2505	-0.516313	-0.786332	1.30264	10.5016	10.3339	11.6314
chr16	3263800	3301401	37602	+	ZNF263	protein_coding	ENSG00000006194	ENSG00000006194.10	1214.72	-0.674684	-0.186636	-0.364897	0.00402147	0.425089	0.100441	TRUE	FALSE	FALSE	down.early	1222	1722	1644	1429	1167	1050	814	920	842	0.826721	0.0760866	-0.902808	10.7006	10.3943	9.99488
chr17	50543058	50555852	12795	+	SPATA20	protein_coding	ENSG00000006282	ENSG00000006282.21	1359.64	0.674528	0.780264	-0.0823287	0.00128717	0.000200205	0.748252	TRUE	TRUE	FALSE	up.early	612	1144	1003	2034	1575	1549	1563	1631	1157	-1.13993	0.680034	0.459899	10.0104	10.801	10.7054
chr16	3018445	3022383	3939	+	TNFRSF12A	protein_coding	ENSG00000006327	ENSG00000006327.14	7610.93	-0.180369	-0.597583	0.381301	0.360788	0.00056777	0.0279854	FALSE	TRUE	FALSE	down.early	7815	10952	8991	6132	6452	4839	8264	9092	6114	0.857922	-1.06157	0.203644	13.1838	12.519	12.9572
chr14	70722526	70809534	87009	-	MAP3K9	protein_coding	ENSG00000006432	ENSG00000006432.15	3317.42	0.0829235	-0.801394	0.903469	0.674053	2.07452e-07	5.03932e-09	FALSE	TRUE	TRUE	up.late	3273	3856	4433	1913	2823	1838	3078	4274	4432	0.539603	-1.26848	0.728875	11.9474	11.1256	12.0335
chr7	39623565	39708120	84556	+	RALA	protein_coding	ENSG00000006451	ENSG00000006451.8	1864.26	-1.02862	-0.828057	-0.150306	1.27783e-09	1.15822e-06	0.440031	TRUE	TRUE	FALSE	down.early	2172	2968	3225	1142	2111	1428	1112	1355	1428	1.25334	-0.466499	-0.786842	11.5216	10.6684	10.5095
chr7	98291650	98401090	109441	-	BAIAP2L1	protein_coding	ENSG00000006453	ENSG00000006453.14	3639.24	-0.236452	-0.989374	0.707013	0.134589	9.27563e-12	9.03664e-07	FALSE	TRUE	TRUE	down.early	4162	5149	5281	2367	2866	2201	3381	4195	3072	0.91358	-1.23832	0.32474	12.2465	11.2602	11.9766
chr7	13891229	13991425	100197	-	ETV1	protein_coding	ENSG00000006468	ENSG00000006468.14	280.256	-0.173407	2.1603	-2.39435	0.51043	3.62889e-19	7.33364e-23	FALSE	TRUE	TRUE	down.late	89	114	179	452	783	865	87	104	112	-0.57447	1.29933	-0.724856	8.02925	9.52685	7.90905
chr1	54779712	54801323	21612	-	TTC22	protein_coding	ENSG00000006555	ENSG00000006555.11	185.057	-0.513062	-1.3259	0.673641	0.0111052	4.58852e-10	0.000989346	FALSE	TRUE	TRUE	down.early	228	291	278	122	101	90	185	175	185	1.09133	-1.14438	0.0530497	8.68858	7.85988	8.30373
chr7	30496621	30504841	8221	-	GGCT	protein_coding	ENSG00000006625	ENSG00000006625.18	1602.91	-0.547423	-0.799338	0.217218	0.000121219	1.48212e-08	0.158723	TRUE	TRUE	FALSE	down.early	1899	2448	2119	1250	1405	1000	1366	1458	1497	1.21876	-0.938851	-0.279905	11.174	10.3997	10.6361
chr7	112422887	112481017	58131	+	IFRD1	protein_coding	ENSG00000006652	ENSG00000006652.15	1037.12	-0.56662	-0.375705	-0.131019	0.000917724	0.0248073	0.512248	TRUE	FALSE	FALSE	down.early	1102	1417	1412	1018	990	937	717	756	1001	1.12324	-0.287761	-0.83548	10.5121	10.1058	9.94811
chr7	74453790	74602605	148816	+	GTF2IRD1	protein_coding	ENSG00000006704	ENSG00000006704.11	2173.24	-1.05875	-0.814386	-0.219041	8.52201e-26	9.67265e-16	0.0527498	TRUE	TRUE	FALSE	down.early	2606	3536	3557	1865	1779	1600	1478	1754	1474	1.301	-0.409502	-0.891501	11.7147	10.9269	10.7049
chr7	38722974	38932394	209421	-	VPS41	protein_coding	ENSG00000006715	ENSG00000006715.16	1693.1	-0.798034	-0.815388	0.0158762	6.08238e-07	3.7632e-07	0.952373	TRUE	TRUE	FALSE	down.early	1856	2544	2826	1457	1675	1428	1018	1272	1244	1.26106	-0.664595	-0.596464	11.3274	10.5105	10.5394
chrX	2903972	2929349	25378	-	ARSD	protein_coding	ENSG00000006756	ENSG00000006756.16	854.852	-1.01305	-1.02776	0.00692725	3.24624e-06	3.17807e-06	0.986414	TRUE	TRUE	FALSE	down.early	815	1249	1214	942	662	715	594	704	489	1.22524	-0.624995	-0.600246	10.5388	9.54667	9.55994
chr16	2817180	2826304	9125	+	PRSS21	protein_coding	ENSG00000007038	ENSG00000007038.11	319.322	8.75022	-0.0667798	8.8792	2.75436e-46	0.859387	3.1312e-34	TRUE	FALSE	TRUE	up.late	2	1	3	3	0	1	1051	1187	921	-0.651158	-0.680272	1.33143	6.50468	6.45178	10.1075
chr17	9910606	10198606	288001	-	GAS7	protein_coding	ENSG00000007237	ENSG00000007237.19	6.67601	3.90299	2.95922	0.07319	0.00139917	0.00440463	0.855892	TRUE	TRUE	FALSE	up.early	1	0	0	7	5	4	12	11	4	-1.08932	0.484658	0.604659	6.31952	6.74678	6.77936
chr19	45162928	45178237	15310	-	TRAPPC6A	protein_coding	ENSG00000007255	ENSG00000007255.10	424.448	0.21597	-0.591731	0.97689	0.490137	0.0366156	0.00222013	FALSE	FALSE	TRUE	up.late	296	577	484	347	163	216	702	697	344	0.281708	-0.985378	0.70367	9.2179	8.54008	9.44362
chr16	784974	788397	3424	-	RPUSD1	protein_coding	ENSG00000007376	ENSG00000007376.8	2275.64	-0.712233	-0.452498	-0.189277	2.13609e-05	0.00624051	0.302252	TRUE	TRUE	FALSE	down.early	2394	3544	3079	2436	2181	1782	1584	1577	1991	1.15	-0.264991	-0.885005	11.6204	11.1104	10.8869
chr16	58059	76355	18297	-	RHBDF1	protein_coding	ENSG00000007384	ENSG00000007384.15	1432.58	-0.85809	-1.17625	0.261314	9.53507e-10	1.0896e-16	0.082345	TRUE	TRUE	FALSE	down.early	1627	2309	2289	893	1074	977	1123	1489	1015	1.27179	-0.897688	-0.374101	11.1904	10.0945	10.359
chr16	566995	584109	17115	+	PIGQ	protein_coding	ENSG00000007541	ENSG00000007541.17	2056.19	-0.902376	-0.365352	-0.429226	3.35588e-07	0.0359361	0.0139154	TRUE	FALSE	FALSE	down.early	1943	3483	2808	2408	2210	1705	1251	1458	1399	1.04076	0.029067	-1.06983	11.4939	11.0659	10.601
chr6	16129086	16148248	19163	+	MYLIP	protein_coding	ENSG00000007944	ENSG00000007944.15	187.367	-0.533201	-1.2815	0.634683	0.00325247	1.1775e-11	0.000597549	TRUE	TRUE	TRUE	down.early	219	280	321	106	112	112	168	203	168	1.12889	-1.15149	0.0226005	8.69418	7.89803	8.30794
chr1	23506438	23531233	24796	-	E2F2	protein_coding	ENSG00000007968	ENSG00000007968.7	923.028	-1.75651	-0.904134	-0.280706	0.000212944	0.0196152	0.364732	TRUE	FALSE	FALSE	down.early	1495	2091	1516	631	844	508	214	237	770	1.1246	-0.213724	-0.910874	10.8579	9.61142	8.96211
chr6	170535120	170553307	18188	-	PSMB1	protein_coding	ENSG00000008018	ENSG00000008018.9	4288.2	0.465175	0.244682	0.186092	9.82348e-05	0.0486427	0.158532	TRUE	FALSE	FALSE	up.early	3006	3906	3808	4155	5006	4021	5030	5300	4461	-1.135	0.103785	1.03122	11.8563	12.1251	12.3264
chr6	15246069	15522042	275974	+	JARID2	protein_coding	ENSG00000008083	ENSG00000008083.14	1605.13	0.697391	1.25129	-0.453407	4.58137e-05	4.51044e-13	0.00674485	TRUE	TRUE	TRUE	up.early	641	982	1208	2120	2676	2317	1495	1972	1258	-1.15508	1.05203	0.103048	10.073	11.2589	10.749
chrX	18425583	18653629	228047	+	CDKL5	protein_coding	ENSG00000008086	ENSG00000008086.13	177.569	1.01789	1.04626	-0.0146783	0.000133489	0.000115236	0.969822	TRUE	TRUE	FALSE	up.early	78	80	127	170	275	253	210	260	155	-1.18875	0.607788	0.580963	7.795	8.47749	8.46729
chr7	6161776	6272644	110869	-	CYTH3	protein_coding	ENSG00000008256	ENSG00000008256.16	1330.45	-0.935542	-0.305512	-0.564545	5.82101e-12	0.0279049	3.3739e-05	TRUE	FALSE	TRUE	down.early	1501	1684	1804	1350	1655	1333	825	1010	806	1.01398	0.195211	-1.2092	10.8858	10.5639	10.0119
chr7	106090505	106112576	22072	-	SYPL1	protein_coding	ENSG00000008282	ENSG00000008282.9	7506.43	0.153718	-0.272573	0.441252	0.358283	0.0658756	0.0021592	FALSE	FALSE	TRUE	up.late	6468	7625	9364	4785	7434	6519	8330	9276	8087	0.1939	-1.08498	0.89108	12.9335	12.6105	13.1096
chr17	63432304	63446354	14051	-	CYB561	protein_coding	ENSG00000008283	ENSG00000008283.16	4143.04	-0.446328	-0.360793	-0.050369	0.00484869	0.0196646	0.821493	TRUE	FALSE	FALSE	down.early	4174	5812	5578	3913	4025	3086	3209	3886	3785	1.12982	-0.468841	-0.66098	12.3465	11.9231	11.8723
chr7	122073549	122144255	70707	-	AASS	protein_coding	ENSG00000008311	ENSG00000008311.15	235.968	0.277817	3.45348	-3.09615	0.240864	1.92165e-58	7.33946e-50	FALSE	TRUE	TRUE	down.late	46	54	61	537	684	619	58	64	71	-0.730992	1.32678	-0.595792	7.44465	9.51704	7.58081
chr12	6310436	6328506	18071	+	PLEKHG6	protein_coding	ENSG00000008323	ENSG00000008323.15	226.583	0.909272	-3.0749	4.15972	0.000345301	1.65627e-22	9.19289e-41	TRUE	TRUE	TRUE	up.late	151	252	220	23	41	16	429	529	309	0.230414	-1.23347	1.00305	8.45176	7.0646	9.18391
chr19	12995475	13098796	103322	+	NFIX	protein_coding	ENSG00000008441	ENSG00000008441.18	3431.36	-0.574216	0.475342	-1.11566	4.47771e-05	0.000606116	1.51044e-15	TRUE	TRUE	TRUE	down.late	2948	3564	3472	5062	5307	4496	2010	2333	1959	0.0514148	1.09807	-1.14948	11.7614	12.2686	11.1794
chr8	133454848	133571940	117093	-	ST3GAL1	protein_coding	ENSG00000008513	ENSG00000008513.16	4160.11	-0.0075118	-0.636486	0.621639	0.973547	7.90611e-06	1.07417e-05	FALSE	TRUE	TRUE	up.late	4052	4844	5528	2961	3149	2868	4172	5552	4361	0.64599	-1.25504	0.609051	12.2658	11.5987	12.2529
chr16	3046561	3060726	14166	+	MMP25	protein_coding	ENSG00000008516	ENSG00000008516.17	30.8567	-0.996768	-1.23845	0.0902544	0.0066101	0.00165785	0.791589	TRUE	TRUE	FALSE	down.early	42	69	55	23	22	12	19	28	12	1.2184	-0.710885	-0.507519	7.44547	6.9644	7.01511
chr16	3065297	3082192	16896	+	IL32	protein_coding	ENSG00000008517	ENSG00000008517.18	112.281	-0.361831	-1.82421	1.10335	0.270402	1.62447e-05	0.00416316	FALSE	TRUE	TRUE	down.early	255	138	116	54	30	39	163	123	76	0.817954	-1.02921	0.211258	8.23396	7.31903	7.93345
chr16	2088708	2135898	47191	-	PKD1	protein_coding	ENSG00000008710	ENSG00000008710.20	6612.65	-1.22285	-0.700721	-0.376144	3.56509e-09	0.000547019	0.0578332	TRUE	TRUE	FALSE	down.early	6403	11016	10571	6847	6960	5073	3739	4702	3601	1.14875	-0.203042	-0.945706	13.3011	12.4874	12.0404
chr17	40019097	40061215	42119	-	MED24	protein_coding	ENSG00000008838	ENSG00000008838.20	4438.83	1.71369	1.10975	0.544263	2.46453e-42	1.57399e-18	1.46866e-05	TRUE	TRUE	TRUE	up.early	2085	2975	2772	4119	5438	4191	4678	5895	5323	-1.24375	0.230334	1.01342	11.0981	12.1808	12.756
chr2	36968383	37084372	115990	-	HEATR5B	protein_coding	ENSG00000008869	ENSG00000008869.12	1748.98	0.235409	-0.396247	0.672295	0.203617	0.0184916	6.44111e-05	FALSE	FALSE	TRUE	up.late	1446	1807	2102	1006	1722	1265	1884	2570	2025	0.180121	-1.10955	0.929427	10.9203	10.4735	11.1799
chr7	157138916	157269370	130455	+	UBE3C	protein_coding	ENSG00000009335	ENSG00000009335.18	7344.22	-0.487998	-0.545123	0.0589013	2.09395e-05	1.44971e-06	0.719097	TRUE	TRUE	FALSE	down.early	7741	9230	10539	5140	7735	5945	5663	7444	7060	1.28436	-0.756942	-0.527423	13.2055	12.6371	12.7011
chr14	77274956	77320883	45928	-	POMT2	protein_coding	ENSG00000009830	ENSG00000009830.12	1006.87	-0.208774	0.540965	-0.851906	0.445542	0.0248652	0.000965428	FALSE	FALSE	TRUE	down.late	744	1115	1048	1448	1600	1273	558	630	614	-0.246089	1.00922	-0.763133	9.97413	10.5956	9.71814
chr7	73593194	73624543	31350	-	MLXIPL	protein_coding	ENSG00000009950	ENSG00000009950.16	8.46779	-2.58746	-3.23193	0.13353	0.00136989	0.000521176	0.725437	TRUE	TRUE	FALSE	down.early	8	15	15	1	4	0	2	3	3	1.16842	-0.738136	-0.430284	7.01336	6.42203	6.51751
chr7	73440406	73522293	81888	-	BAZ1B	protein_coding	ENSG00000009954	ENSG00000009954.11	6318.4	-0.873083	-0.346605	-0.440913	2.31711e-08	0.0273429	0.00475932	TRUE	FALSE	TRUE	down.early	7275	8930	8892	5324	8448	5638	3433	4424	5085	1.04576	0.0724085	-1.11817	13.0496	12.6377	12.1338
chr6	36354091	36387800	33710	-	ETV7	protein_coding	ENSG00000010030	ENSG00000010030.14	23.0609	0.817717	-0.290895	1.62311	0.0295259	0.352174	0.000798887	FALSE	FALSE	TRUE	up.late	16	15	22	7	11	13	56	41	26	-0.263972	-0.86841	1.13238	6.9551	6.80687	7.29755
chr7	38178245	38230670	52426	+	STARD3NL	protein_coding	ENSG00000010270	ENSG00000010270.14	1120.28	-0.598529	-0.292106	-0.244656	6.75976e-05	0.0538598	0.123745	TRUE	FALSE	FALSE	down.early	1096	1445	1709	844	1298	1174	787	958	885	1.09638	-0.0877114	-1.00867	10.5846	10.2658	10.018
chr12	6199715	6238271	38557	+	CD9	protein_coding	ENSG00000010278	ENSG00000010278.15	6893.74	-0.629344	-0.951307	0.268865	3.00062e-05	2.67706e-10	0.0876581	TRUE	TRUE	FALSE	down.early	8033	10474	10940	4366	5430	4999	6026	7072	4959	1.21281	-0.935458	-0.277356	13.2708	12.2923	12.5921
chr12	6493356	6531955	38600	+	NCAPD2	protein_coding	ENSG00000010292	ENSG00000010292.13	13562.5	0.455484	0.38147	0.0452957	0.00132695	0.00623758	0.826681	TRUE	TRUE	FALSE	up.early	8668	11673	11351	13638	19250	12668	14278	18433	13587	-1.17601	0.476212	0.699802	13.421	13.8463	13.9038
chr19	45668221	45683722	15502	+	GIPR	protein_coding	ENSG00000010310	ENSG00000010310.9	17.6105	-0.232769	-3.73459	3.23036	0.524372	1.19729e-07	4.28821e-06	FALSE	TRUE	TRUE	down.early	17	29	23	5	1	2	24	32	10	0.854283	-1.28095	0.426666	7.1594	6.49459	7.02626
chr3	52410660	52423641	12982	+	PHF7	protein_coding	ENSG00000010318	ENSG00000010318.21	129.025	0.959149	0.190007	0.625485	7.88538e-05	0.428223	0.00644678	TRUE	FALSE	TRUE	up.late	64	104	104	115	140	91	155	234	152	-0.838882	-0.335064	1.17395	7.75423	7.90113	8.34113
chr3	52455118	52493068	37951	+	NISCH	protein_coding	ENSG00000010322	ENSG00000010322.16	1980.7	-0.0499906	0.35358	-0.410602	0.790797	0.0103673	0.00282554	FALSE	FALSE	TRUE	down.late	1378	2127	2046	2440	2521	2269	1560	2077	1539	-0.483009	1.19344	-0.710428	10.9328	11.3148	10.881
chr19	49806866	49817376	10511	-	FUZ	protein_coding	ENSG00000010361	ENSG00000010361.14	50.9699	-5.54431	-0.929284	-4.31615	3.08501e-14	0.0036863	5.57416e-09	TRUE	TRUE	TRUE	down.early	82	137	137	65	37	57	2	2	1	1.0353	0.169415	-1.20471	7.86604	7.35361	6.54039
chrX	149476988	149521096	44109	-	IDS	protein_coding	ENSG00000010404	ENSG00000010404.18	2052.4	-0.863354	-0.787951	-0.0619311	3.49234e-12	2.66883e-10	0.730046	TRUE	TRUE	FALSE	down.early	2693	2892	3363	1414	1931	1751	1353	1726	1494	1.30504	-0.567033	-0.738003	11.5889	10.8189	10.7486
chr6	26087281	26098343	11063	+	HFE	protein_coding	ENSG00000010704	ENSG00000010704.18	555.629	-1.25325	-0.588005	-0.58082	1.27284e-17	4.73208e-05	7.75127e-05	TRUE	TRUE	TRUE	down.early	606	908	841	595	527	476	344	394	293	1.15307	-0.0284775	-1.12459	9.9117	9.38138	8.88941
chr6	111660332	111873452	213121	-	FYN	protein_coding	ENSG00000010810	ENSG00000010810.17	212.432	1.13542	3.29958	-2.03305	2.34521e-06	6.67472e-43	4.45558e-21	TRUE	TRUE	TRUE	up.early	41	39	48	440	559	422	127	141	113	-0.95308	1.27285	-0.319768	7.3884	9.27787	7.92599
chr6	142751469	142956698	205230	-	HIVEP2	protein_coding	ENSG00000010818	ENSG00000010818.10	1930.82	0.433111	0.740015	-0.248913	0.0290379	0.000136085	0.208044	FALSE	TRUE	FALSE	up.early	1161	1349	1636	1678	3204	2601	1753	2328	1814	-1.0422	0.885752	0.156451	10.5744	11.3207	11.0384
chr1	11806096	11848079	41984	+	CLCN6	protein_coding	ENSG00000011021	ENSG00000011021.23	590.073	-0.150029	0.424816	-0.603147	0.465219	0.0137962	0.00046967	FALSE	FALSE	TRUE	down.late	376	558	574	705	857	792	436	569	475	-0.332535	1.1514	-0.818869	9.40541	9.82989	9.26629
chr17	62627670	62693597	65928	+	MRC2	protein_coding	ENSG00000011028	ENSG00000011028.14	823.322	2.1934	3.24311	-0.921289	9.29484e-20	1.09866e-41	4.77787e-05	TRUE	TRUE	TRUE	up.early	146	164	151	1801	1577	1444	668	891	661	-1.22655	1.01055	0.216006	8.19786	10.7107	9.81826
chr12	3077355	3286564	209210	+	TSPAN9	protein_coding	ENSG00000011105	ENSG00000011105.14	953.414	-0.670804	0.91297	-1.70572	0.000445262	1.63465e-06	1.79183e-18	TRUE	TRUE	TRUE	down.late	665	751	781	1749	1652	1461	432	611	461	-0.137096	1.18014	-1.04305	9.87537	10.7596	9.26725
chr3	43690108	43734371	44264	+	ABHD5	protein_coding	ENSG00000011198	ENSG00000011198.10	1120.99	-0.728458	-0.295164	-0.337941	4.76452e-05	0.0970471	0.059465	TRUE	FALSE	FALSE	down.early	1365	1335	1671	796	1448	1206	662	852	874	1.01195	0.0091212	-1.02107	10.6242	10.2793	9.92491
chr17	51177425	51260163	82739	-	MBTD1	protein_coding	ENSG00000011258	ENSG00000011258.16	674.572	0.672895	-0.119471	0.817175	1.00087e-05	0.514078	7.91491e-08	TRUE	FALSE	TRUE	up.late	448	617	755	496	643	509	766	964	810	-0.464595	-0.800664	1.26526	9.48242	9.365	10.0868
chr19	38211006	38229714	18709	-	DPF1	protein_coding	ENSG00000011332	ENSG00000011332.19	72.6491	0.731861	2.11775	-1.12708	0.00983244	6.14182e-12	7.96029e-05	TRUE	TRUE	TRUE	up.early	27	37	33	113	173	93	39	58	67	-0.994094	1.21973	-0.225639	7.1497	8.05262	7.46312
chr11	61513714	61581148	67435	-	SYT7	protein_coding	ENSG00000011347	ENSG00000011347.10	309.955	1.35216	1.08858	0.156957	1.34273e-07	2.0064e-05	0.53176	TRUE	TRUE	FALSE	up.early	125	154	178	431	357	375	378	536	256	-1.18058	0.43296	0.747617	8.16745	8.95629	9.11012
chr3	45388561	45554726	166166	+	LARS2	protein_coding	ENSG00000011376	ENSG00000011376.12	2305.64	-0.353605	-0.0123593	-0.324082	0.00956217	0.954343	0.016288	TRUE	FALSE	FALSE	down.late	2068	2596	2768	2376	3274	2267	1477	1967	2223	0.63528	0.553967	-1.18925	11.379	11.3628	11.0142
chr19	43646095	43670547	24453	-	PLAUR	protein_coding	ENSG00000011422	ENSG00000011422.12	3037.84	0.810496	-0.0156981	0.825226	2.80872e-06	0.951816	2.00795e-06	TRUE	FALSE	TRUE	up.late	1982	2746	2305	2371	2985	1755	4465	5357	3719	-0.58503	-0.648751	1.23378	11.3045	11.2752	12.1382
chr7	36389821	36453791	63971	+	ANLN	protein_coding	ENSG00000011426	ENSG00000011426.11	16889.6	-0.740721	-1.05818	0.247272	1.11916e-05	5.28891e-10	0.161357	TRUE	TRUE	FALSE	down.early	21185	26142	26778	7279	18251	11734	13437	15036	13761	1.20914	-0.914128	-0.295015	14.6102	13.4859	13.8137
chr19	15419978	15449956	29979	-	WIZ	protein_coding	ENSG00000011451	ENSG00000011451.21	2066.08	0.0491107	0.549026	-0.49013	0.783053	1.81107e-05	0.000125261	FALSE	TRUE	TRUE	down.late	1275	2136	1849	2689	2979	2398	1603	2021	1833	-0.730959	1.26696	-0.536004	10.8862	11.4458	10.9408
chr9	122940833	123104866	164034	+	RABGAP1	protein_coding	ENSG00000011454	ENSG00000011454.18	3081.86	0.3345	-0.0390952	0.36431	0.0158094	0.840822	0.00679235	FALSE	FALSE	TRUE	up.late	2227	2882	3274	2431	3483	2753	3254	4239	3374	-0.492974	-0.683471	1.17645	11.5418	11.5015	11.8946
chr12	91140484	91183217	42734	-	DCN	protein_coding	ENSG00000011465	ENSG00000011465.18	3914.11	-0.0825503	9.88572	-10.0346	0.831152	5.52473e-166	3.75949e-171	FALSE	TRUE	TRUE	down.late	10	10	13	14742	10818	11857	9	11	13	-0.658607	1.32969	-0.671079	6.86218	13.4881	6.82061
chr19	45692403	45703989	11587	+	QPCTL	protein_coding	ENSG00000011478	ENSG00000011478.13	1520.46	0.681385	0.419945	0.168912	0.000836915	0.0330175	0.441278	TRUE	FALSE	FALSE	up.early	803	1404	1261	1952	1574	1226	1739	2181	1541	-1.0307	0.189938	0.840758	10.2763	10.7359	10.981
chr19	46347087	46392981	45895	+	PPP5C	protein_coding	ENSG00000011485	ENSG00000011485.15	5206.39	0.093653	0.66134	-0.545357	0.60284	3.19272e-06	0.000108302	FALSE	TRUE	TRUE	down.late	3456	4858	4854	6805	8281	6395	3715	4411	4544	-0.77007	1.23763	-0.467564	12.0859	12.7752	12.1897
chr2	65056366	65087004	30639	+	CEP68	protein_coding	ENSG00000011523	ENSG00000011523.14	913.367	1.37545	0.922439	0.380023	1.78459e-20	6.6084e-10	0.00994272	TRUE	TRUE	TRUE	up.early	363	519	587	1017	1080	876	1286	1520	1035	-1.24279	0.263104	0.979683	9.30636	10.1106	10.4933
chr2	39249266	39437301	188036	-	MAP4K3	protein_coding	ENSG00000011566	ENSG00000011566.15	1335.67	-0.154803	-0.715088	0.509993	0.480905	0.00018081	0.00623601	FALSE	TRUE	TRUE	down.early	1346	1699	2093	642	1111	1034	1324	1537	1351	0.789879	-1.13388	0.344004	10.7992	10.061	10.6281
chr16	21158377	21180616	22240	+	LDAF1	protein_coding	ENSG00000011638	ENSG00000011638.11	1571.68	0.21737	-1.11471	1.47331	0.432228	4.72974e-05	2.28579e-07	FALSE	TRUE	TRUE	up.late	1267	1980	2121	797	823	601	2239	2949	1338	0.421901	-1.15306	0.731158	10.9045	9.77345	11.1266
chr19	45407334	45478828	71495	-	ERCC1	protein_coding	ENSG00000012061	ENSG00000012061.16	5528.62	0.891316	0.804561	0.0540287	1.43313e-05	9.52233e-05	0.841724	TRUE	TRUE	FALSE	up.early	2557	4145	3703	7421	6782	5691	6947	7298	5048	-1.17361	0.513997	0.659615	11.794	12.6573	12.7318
chr19	35319261	35347361	28101	+	CD22	protein_coding	ENSG00000012124	ENSG00000012124.17	66.1312	1.52072	-0.383753	2.52674	0.000706015	0.224672	5.53918e-07	TRUE	FALSE	TRUE	up.late	25	29	27	19	22	27	153	239	83	-0.331401	-0.785708	1.11711	7.2595	7.01833	8.02846
chr3	50267558	50277546	9989	+	SEMA3B	protein_coding	ENSG00000012171	ENSG00000012171.20	1562.63	-0.165717	-0.739775	0.504165	0.518222	0.00121911	0.0212988	FALSE	TRUE	FALSE	down.early	1183	2538	2212	1219	1104	925	1687	1875	1345	0.719695	-1.02204	0.302345	11.0024	10.2293	10.8172
chr6	53267398	53349179	81782	-	ELOVL5	protein_coding	ENSG00000012660	ENSG00000012660.14	3354.83	-0.451782	0.0447847	-0.482106	0.00906386	0.845933	0.00382296	TRUE	FALSE	TRUE	down.late	3249	3328	4641	2609	5160	4700	2111	2720	2440	0.481687	0.62431	-1.106	11.894	11.937	11.4156
chr12	53708517	53727745	19229	-	CALCOCO1	protein_coding	ENSG00000012822	ENSG00000012822.16	987.114	0.10335	0.679703	-0.528851	0.70862	0.00286421	0.0165062	FALSE	TRUE	FALSE	down.late	571	894	929	1361	1186	1445	818	1091	566	-0.620816	1.04194	-0.42112	9.83221	10.5352	9.91664
chr2	31234152	31269451	35300	+	EHD3	protein_coding	ENSG00000013016	ENSG00000013016.16	56.1789	2.07988	2.83821	-0.489363	3.04647e-08	3.20464e-14	0.055116	TRUE	TRUE	FALSE	up.early	10	8	20	89	113	96	48	65	63	-1.24384	0.992787	0.251053	6.85118	7.82056	7.49909
chr4	6575189	6623362	48174	+	MAN2B2	protein_coding	ENSG00000013288	ENSG00000013288.9	1596.97	-1.15131	-0.505684	-0.568504	1.77795e-16	0.000298041	5.01777e-05	TRUE	TRUE	TRUE	down.early	1922	2553	2923	1372	1524	1376	847	1102	1039	1.11681	0.023203	-1.14002	11.2377	10.7139	10.1566
chr17	44319625	44324870	5246	-	SLC25A39	protein_coding	ENSG00000013306	ENSG00000013306.16	7598.34	0.706566	0.237716	0.390291	1.60585e-05	0.161509	0.0168252	TRUE	FALSE	FALSE	up.late	4684	7086	5893	7773	8293	5729	9309	10432	9195	-0.942313	-0.171269	1.11358	12.5329	12.8163	13.2884
chr16	29820394	29848039	27646	+	MVP	protein_coding	ENSG00000013364	ENSG00000013364.19	10209.3	-1.13365	-0.620052	-0.337501	1.23282e-06	0.00553232	0.122608	TRUE	TRUE	FALSE	down.early	11961	18171	16487	10498	7739	8670	6687	7818	4294	1.08789	-0.172159	-0.915732	13.9077	13.114	12.6456
chr7	151341699	151378449	36751	+	NUB1	protein_coding	ENSG00000013374	ENSG00000013374.16	2147.36	-0.812015	-0.606446	-0.170847	5.40544e-11	1.09302e-06	0.233257	TRUE	TRUE	FALSE	down.early	2473	2894	3065	1894	2216	1778	1509	1843	1569	1.26951	-0.381095	-0.88841	11.591	10.9846	10.7983
chr6	83161150	83193936	32787	-	PGM3	protein_coding	ENSG00000013375	ENSG00000013375.16	1549.14	0.544844	0.0847788	0.405047	0.00252648	0.702829	0.0212398	TRUE	FALSE	FALSE	up.late	1088	1240	1358	1151	1911	1560	1923	2204	1544	-0.70511	-0.365873	1.07098	10.4904	10.5924	11.0245
chr6	83193357	83198935	5579	+	RWDD2A	protein_coding	ENSG00000013392	ENSG00000013392.8	153.056	0.541614	0.0970732	0.378929	0.00579671	0.677196	0.045172	TRUE	FALSE	FALSE	up.late	88	143	151	136	157	133	187	220	173	-0.84082	-0.378348	1.21917	8.0095	8.09094	8.37225
chr14	76786009	76826246	40238	-	ANGEL1	protein_coding	ENSG00000013523	ENSG00000013523.11	1327.72	0.527523	0.0264304	0.482997	7.38387e-06	0.884547	3.31116e-05	TRUE	FALSE	TRUE	up.late	853	1336	1382	1149	1443	1111	1355	1800	1557	-0.70786	-0.594962	1.30282	10.3342	10.3624	10.8362
chr5	141958328	141990292	31965	+	RNF14	protein_coding	ENSG00000013561	ENSG00000013561.18	2377.7	-0.392367	0.0643257	-0.453294	0.000221145	0.657876	1.25497e-05	TRUE	FALSE	TRUE	down.late	2151	2670	3023	2561	3187	2600	1658	1885	1913	0.490852	0.811214	-1.30207	11.3973	11.4661	11.0118
chrX	154401236	154412112	10877	-	DNASE1L1	protein_coding	ENSG00000013563	ENSG00000013563.14	1355.56	0.202931	-0.389196	0.628952	0.301849	0.0260762	0.000321063	FALSE	FALSE	TRUE	up.late	1196	1433	1406	817	1182	1060	1752	2141	1299	0.227156	-1.08567	0.858516	10.5989	10.1717	10.8043
chr12	12891559	12917937	26379	+	GPRC5A	protein_coding	ENSG00000013588	ENSG00000013588.9	29019.7	-0.542413	-2.17451	1.57824	0.000667375	5.93002e-43	3.6829e-23	TRUE	TRUE	TRUE	down.early	36852	43694	50869	7567	14417	8475	27204	40792	33429	0.934898	-1.27178	0.336881	15.5028	13.3062	14.9075
chrX	150361422	150514178	152757	+	MAMLD1	protein_coding	ENSG00000013619	ENSG00000013619.14	269.479	-1.82347	-0.0518533	-1.74152	1.1617e-12	0.852987	1.43217e-11	TRUE	FALSE	TRUE	down.late	332	289	352	278	445	377	83	88	141	0.694992	0.589045	-1.28404	8.98873	8.9257	7.81147
chr8	143437659	143541447	103789	-	ZC3H3	protein_coding	ENSG00000014164	ENSG00000014164.7	932.321	-0.473771	-0.463943	0.00693591	0.000792648	0.000793117	0.981814	TRUE	TRUE	FALSE	down.early	992	1221	1212	713	1022	792	762	975	727	1.24888	-0.634925	-0.613951	10.3619	9.90918	9.91422
chr11	65180566	65212006	31441	+	CAPN1	protein_coding	ENSG00000014216	ENSG00000014216.16	19396.7	-0.160813	-0.666286	0.486149	0.197073	7.40967e-10	7.68881e-06	FALSE	TRUE	TRUE	down.early	18383	26781	24777	14857	15796	13513	19531	23134	18401	0.910335	-1.26567	0.355335	14.5139	13.8238	14.3379
chr3	132317369	132368298	50930	+	ACP3	protein_coding	ENSG00000014257	ENSG00000014257.16	92.9915	-1.98125	-0.564893	-1.18948	1.75512e-12	0.0160546	2.64546e-05	TRUE	FALSE	TRUE	down.early	105	161	184	96	89	82	34	44	36	1.06588	0.10977	-1.17565	8.15758	7.77053	7.25017
chr2	63588609	63607197	18589	+	MDH1	protein_coding	ENSG00000014641	ENSG00000014641.21	6575.84	0.350386	-0.0386582	0.379805	0.00950105	0.840058	0.00387097	TRUE	FALSE	TRUE	up.late	4966	6559	6505	5758	6478	5502	8263	8494	6813	-0.485381	-0.697494	1.18287	12.5951	12.5487	12.9596
chr4	41990502	42090461	99960	+	SLC30A9	protein_coding	ENSG00000014824	ENSG00000014824.14	2326.75	-0.550582	-0.208229	-0.268696	0.00215873	0.261489	0.140823	TRUE	FALSE	FALSE	down.early	2332	2546	3355	1732	3019	2860	1639	1975	1692	0.92422	0.0288265	-0.953046	11.5304	11.2564	10.9558
chr14	91271323	91417844	146522	-	CCDC88C	protein_coding	ENSG00000015133	ENSG00000015133.19	1236.16	1.97116	0.746343	1.12127	9.02795e-27	4.05351e-05	1.03421e-09	TRUE	TRUE	TRUE	up.early	527	663	520	991	1279	967	1669	2186	1812	-1.04532	-0.15631	1.20163	9.4243	10.1245	11.194
chr12	42157104	42238349	81246	-	YAF2	protein_coding	ENSG00000015153	ENSG00000015153.15	631.408	0.28613	0.454715	-0.16151	0.0451101	0.000688756	0.292333	FALSE	TRUE	FALSE	up.early	451	542	677	574	789	697	593	683	680	-1.17447	1.00692	0.167554	9.37142	9.78683	9.62699
chr10	134465	254637	120173	+	ZMYND11	protein_coding	ENSG00000015171	ENSG00000015171.20	1954.47	-0.601901	-0.00405206	-0.573185	0.000250224	0.989047	0.000369943	TRUE	FALSE	TRUE	down.late	2017	2110	2685	1596	2754	2464	1204	1431	1532	0.605808	0.588542	-1.19435	11.2095	11.2038	10.6103
chr22	17734138	17774770	40633	-	BID	protein_coding	ENSG00000015475	ENSG00000015475.19	2671.71	0.410862	-0.628224	1.11576	0.0124631	8.34927e-05	5.89448e-12	FALSE	TRUE	TRUE	up.late	2297	3081	2571	1789	1997	1612	3452	3684	3114	0.144271	-1.16989	1.02562	11.4625	10.8113	11.8992
chr17	50346126	50363138	17013	+	XYLT2	protein_coding	ENSG00000015532	ENSG00000015532.10	1639.55	1.29696	0.644192	0.597144	7.97002e-28	9.19155e-08	4.06429e-07	TRUE	TRUE	TRUE	up.early	711	1100	1128	1429	1906	1361	2278	2742	2243	-1.1509	0.00881376	1.14209	10.1209	10.7283	11.3219
chr7	44379119	44490658	111540	-	NUDCD3	protein_coding	ENSG00000015676	ENSG00000015676.18	5183.4	-0.669579	-0.468219	-0.148551	1.22858e-05	0.00205131	0.403374	TRUE	TRUE	FALSE	down.early	5187	7664	7334	4961	5531	3903	3886	4406	3947	1.18581	-0.344507	-0.8413	12.7542	12.2258	12.0543
chr3	53812335	53846419	34085	-	CHDH	protein_coding	ENSG00000016391	ENSG00000016391.11	554.512	-0.549967	-2.02208	1.15815	0.0655852	1.32025e-08	0.000627269	FALSE	TRUE	TRUE	down.early	817	1007	892	193	286	162	372	457	599	0.956125	-1.10756	0.151433	10.0368	8.37381	9.38833
chr1	86547078	86580754	33677	+	CLCA4	protein_coding	ENSG00000016602	ENSG00000016602.9	12.5023	5.77119	0.211927	4.64973	3.8197e-06	0.554651	4.19847e-06	TRUE	FALSE	TRUE	up.late	0	1	0	1	1	1	34	52	23	-0.77229	-0.520739	1.29303	6.33584	6.44572	7.23801
chr3	52694488	52706032	11545	-	GLT8D1	protein_coding	ENSG00000016864	ENSG00000016864.18	1007.82	-0.248735	0.268425	-0.543981	0.171631	0.114347	0.000973217	FALSE	FALSE	TRUE	down.late	796	934	1118	1113	1473	1207	803	945	710	-0.0452146	1.02766	-0.982444	10.1421	10.4415	9.88048
chr3	130850595	131016712	166118	+	ATP2C1	protein_coding	ENSG00000017260	ENSG00000017260.20	4961.95	0.432326	-0.210614	0.668121	0.00343909	0.173202	2.83207e-06	TRUE	FALSE	TRUE	up.late	3781	4641	5427	3176	4865	3630	5714	7040	6738	-0.20123	-0.961705	1.16294	12.2185	11.9626	12.6776
chr18	9475009	9538114	63106	+	RALBP1	protein_coding	ENSG00000017797	ENSG00000017797.13	4736.6	-0.291685	-0.417675	0.124339	0.0174616	0.000345115	0.38252	FALSE	TRUE	FALSE	down.early	4259	6178	6375	3705	5122	3912	4221	5057	4124	1.19378	-0.925466	-0.268311	12.492	12.0488	12.1862
chr12	40692439	41072415	379977	+	CNTN1	protein_coding	ENSG00000018236	ENSG00000018236.15	4.38068	4.4952	0.313674	1.86575	0.000705356	0.39706	0.018526	TRUE	FALSE	FALSE	up.late	0	0	0	2	0	1	6	16	9	-0.834249	-0.386796	1.22104	6.28361	6.40431	6.838
chr3	149517235	149736714	219480	-	WWTR1	protein_coding	ENSG00000018408	ENSG00000018408.15	6768.25	2.37506	0.711946	1.60106	3.03647e-57	1.96827e-06	1.08827e-26	TRUE	TRUE	TRUE	up.late	2277	2799	3163	3853	5763	4446	10111	13036	12103	-0.983455	-0.274301	1.25776	11.393	12.131	13.7256
chr1	160115759	160143591	27833	+	ATP1A2	protein_coding	ENSG00000018625	ENSG00000018625.15	6.59122	-0.56443	2.06602	-5.18281	0.238781	0.0112723	0.000139711	FALSE	FALSE	TRUE	down.late	0	1	2	33	5	28	0	0	0	-0.362971	1.15015	-0.787181	6.42681	6.9376	6.28361
chr2	32628032	32821051	193020	+	TTC27	protein_coding	ENSG00000018699	ENSG00000018699.13	1252.86	0.656651	0.0449473	0.578847	2.34227e-05	0.835061	0.000152361	TRUE	FALSE	TRUE	up.late	925	1116	1063	999	1393	953	1402	1564	1823	-0.694919	-0.539415	1.23433	10.193	10.244	10.8258
chr11	118606440	118658031	51592	+	PHLDB1	protein_coding	ENSG00000019144	ENSG00000019144.19	3018.68	1.70974	1.34408	0.295959	2.7661e-27	2.47484e-17	0.0661923	TRUE	TRUE	FALSE	up.early	1219	1196	1470	3775	3517	3317	3936	4855	3825	-1.28356	0.412784	0.870774	10.5012	11.7875	12.1348
chr20	54153446	54173986	20541	-	CYP24A1	protein_coding	ENSG00000019186	ENSG00000019186.10	40.8171	5.31293	1.66662	3.03833	6.19941e-19	0.00287727	4.67136e-10	TRUE	TRUE	TRUE	up.late	3	4	3	6	12	7	102	159	122	-0.882483	-0.400127	1.28261	6.55651	6.85163	7.88118
chr11	45095806	45235110	139305	+	PRDM11	protein_coding	ENSG00000019485	ENSG00000019485.13	153.761	1.45452	1.68581	-0.112082	3.27765e-06	1.49555e-07	0.701716	TRUE	TRUE	FALSE	up.early	58	65	66	191	285	181	135	193	177	-1.20157	0.727147	0.474421	7.51595	8.44236	8.32097
chr8	48917598	48921740	4143	-	SNAI2	protein_coding	ENSG00000019549	ENSG00000019549.13	887.687	0.482838	2.36154	-1.78027	0.023785	1.45833e-27	1.81809e-16	FALSE	TRUE	TRUE	up.early	332	279	444	1270	1979	2156	497	557	458	-0.87773	1.27486	-0.397131	8.90623	10.9244	9.35682
chr10	124942123	124988189	46067	+	ZRANB1	protein_coding	ENSG00000019995	ENSG00000019995.6	1178.36	0.44178	0.16351	0.240099	0.00112279	0.277182	0.0903971	TRUE	FALSE	FALSE	up.early	861	988	1140	996	1396	1103	1235	1531	1412	-0.984341	-0.135573	1.11991	10.1664	10.337	10.5894
chr1	35557473	35567274	9802	+	NCDN	protein_coding	ENSG00000020129	ENSG00000020129.16	1605.26	0.674649	0.928564	-0.202496	4.14496e-05	1.81214e-08	0.252398	TRUE	TRUE	FALSE	up.early	806	1265	1051	2481	2080	1734	1544	1836	1740	-1.21911	0.871016	0.348093	10.2108	11.0935	10.8726
chr8	37784191	37844896	60706	+	ADGRA2	protein_coding	ENSG00000020181	ENSG00000020181.18	12.8051	-0.111695	1.95576	-2.3495	0.792255	0.000807064	0.000191807	FALSE	TRUE	TRUE	down.late	4	7	4	29	44	21	4	6	3	-0.568534	1.2869	-0.718361	6.65622	7.14356	6.61687
chr11	73646178	73662819	16642	+	PLEKHB1	protein_coding	ENSG00000021300	ENSG00000021300.14	270.853	4.46814	-2.04582	6.67365	6.10859e-36	1.33884e-05	2.65018e-48	TRUE	TRUE	TRUE	up.late	38	35	33	4	4	13	811	1001	576	-0.483453	-0.819141	1.30259	7.21401	6.7259	9.81101
chr6	2832332	2841959	9628	-	SERPINB1	protein_coding	ENSG00000021355	ENSG00000021355.13	2710.21	0.699643	-1.12248	1.9919	0.00218201	2.36742e-06	1.70173e-16	TRUE	TRUE	TRUE	up.late	2483	2420	2636	986	1236	1183	4384	5624	2883	0.141645	-1.15041	1.00877	11.382	10.2695	12.1287
chr2	32063556	32157637	94082	+	SPAST	protein_coding	ENSG00000021574	ENSG00000021574.13	895.826	0.467292	-0.0998386	0.569787	0.0021407	0.592646	0.000114502	TRUE	FALSE	TRUE	up.late	722	785	941	597	868	802	1010	1228	1110	-0.408177	-0.808391	1.21657	9.89477	9.78492	10.3407
chr11	3087107	3166739	79633	-	OSBPL5	protein_coding	ENSG00000021762	ENSG00000021762.20	3777.02	-0.210258	0.762385	-1.06597	0.372678	0.000413287	1.95798e-06	FALSE	TRUE	TRUE	down.late	2265	3721	3736	6299	5104	5744	2458	3021	1818	-0.341487	1.1453	-0.803812	11.6502	12.4694	11.3955
chr2	210477682	210679107	201426	+	CPS1	protein_coding	ENSG00000021826	ENSG00000021826.17	1344.73	-0.230851	0.318423	-0.575884	0.164953	0.0369175	0.000119176	FALSE	FALSE	TRUE	down.late	957	1316	1619	1403	2119	1631	928	1318	988	-0.13623	1.1099	-0.973669	10.4852	10.8321	10.2521
chrX	136146702	136211359	64658	+	FHL1	protein_coding	ENSG00000022267	ENSG00000022267.19	53.3077	7.51091	7.92922	-0.358692	8.57736e-11	3.29174e-12	0.179273	TRUE	TRUE	FALSE	up.early	0	0	0	78	105	113	54	79	54	-1.30063	0.846623	0.454012	6.28361	7.81383	7.53404
chr8	141207166	141308305	101140	-	SLC45A4	protein_coding	ENSG00000022567	ENSG00000022567.10	549.735	-0.562291	-0.502229	-0.0226427	0.00382142	0.00776045	0.937791	TRUE	TRUE	FALSE	down.early	573	776	766	494	544	387	430	464	494	1.13571	-0.520342	-0.615365	9.75465	9.26094	9.23261
chr11	123358428	123627774	269347	+	GRAMD1B	protein_coding	ENSG00000023171	ENSG00000023171.18	7.11221	1.93814	1.94938	-0.00230512	0.00604321	0.00509019	0.999159	TRUE	TRUE	FALSE	up.early	4	1	3	7	9	9	4	8	4	-1.2016	0.586333	0.615268	6.45959	6.78875	6.79408
chr3	52198086	52214327	16242	+	ALAS1	protein_coding	ENSG00000023330	ENSG00000023330.15	2444.33	1.15278	-0.0959293	1.30397	4.09696e-11	0.65305	2.53961e-13	TRUE	FALSE	TRUE	up.late	1389	1808	1933	1423	1898	1536	4030	5188	2991	-0.539593	-0.734275	1.27387	10.8802	10.7599	12.0011
chr11	102317450	102339403	21954	+	BIRC3	protein_coding	ENSG00000023445	ENSG00000023445.16	2297.31	-1.42699	-1.41524	-0.0108917	3.30681e-09	6.70546e-09	0.978803	TRUE	TRUE	FALSE	down.early	3325	4148	4712	1043	1801	1520	1362	1468	1238	1.2428	-0.622245	-0.620556	12.0332	10.5865	10.5878
chr14	61762420	61796428	34009	+	SNAPC1	protein_coding	ENSG00000023608	ENSG00000023608.5	268.438	0.662542	0.422882	0.150379	0.00146462	0.0352739	0.506353	TRUE	FALSE	FALSE	up.early	177	180	218	225	376	275	356	352	268	-1.08868	0.259745	0.828935	8.36953	8.72295	8.87213
chr12	15911302	16037381	126080	+	DERA	protein_coding	ENSG00000023697	ENSG00000023697.13	1574.38	-0.755656	-0.631801	-0.100337	5.33344e-10	2.28366e-07	0.526507	TRUE	TRUE	FALSE	down.early	1844	2153	2461	1097	1698	1361	1135	1250	1274	1.29511	-0.494872	-0.80024	11.1621	10.545	10.4398
chr12	15882387	15903478	21092	+	STRAP	protein_coding	ENSG00000023734	ENSG00000023734.11	5774	0.180673	0.308234	-0.128321	0.142279	0.00606299	0.333938	FALSE	TRUE	FALSE	up.early	4281	5160	5696	5804	7985	6144	5084	6086	6125	-1.11181	1.01377	0.0980454	12.3524	12.6844	12.5413
chr10	99782640	99852594	69955	+	ABCC2	protein_coding	ENSG00000023839	ENSG00000023839.12	1650.3	-4.76458	-2.14264	-2.54677	7.93076e-90	7.36795e-21	2.23637e-26	TRUE	TRUE	TRUE	down.early	3193	4076	5069	909	802	1073	87	111	196	1.16003	-0.0268604	-1.13317	11.9932	9.97398	8.09184
chr6	35297818	35321771	23954	+	DEF6	protein_coding	ENSG00000023892	ENSG00000023892.11	827.732	0.595286	0.200926	0.321059	0.000539163	0.267839	0.0620682	TRUE	FALSE	FALSE	up.late	466	752	666	871	854	637	1158	1250	924	-0.926386	-0.146148	1.07253	9.64887	9.86713	10.208
chr1	150149183	150164720	15538	+	PLEKHO1	protein_coding	ENSG00000023902	ENSG00000023902.14	80.9371	0.61837	1.99645	-1.18862	0.0175564	2.0779e-13	3.43945e-06	FALSE	TRUE	TRUE	up.early	34	37	35	135	189	154	50	58	59	-0.97292	1.25873	-0.285812	7.23671	8.13552	7.51345
chr1	93885199	93909456	24258	-	GCLM	protein_coding	ENSG00000023909	ENSG00000023909.10	1830.62	-0.505454	-0.49023	0.00748809	0.00359594	0.00366528	0.983305	TRUE	TRUE	FALSE	down.early	2045	2350	2745	1224	2177	1544	1350	1414	1790	1.1484	-0.600609	-0.54779	11.2806	10.737	10.7534
chr6	42564029	42693505	129477	+	UBR2	protein_coding	ENSG00000024048	ENSG00000024048.11	2523.52	-0.462246	-0.115244	-0.301936	0.00338392	0.533448	0.0574035	TRUE	FALSE	FALSE	down.late	2351	2823	3543	2070	3369	2650	1819	2316	1981	0.824298	0.247203	-1.0715	11.5736	11.4291	11.0989
chr19	47713422	47743134	29713	+	EHD2	protein_coding	ENSG00000024422	ENSG00000024422.12	8406.92	0.578675	1.10633	-0.453553	0.000193784	8.26266e-13	0.00297903	TRUE	TRUE	TRUE	up.early	3855	6117	6054	12192	12883	10856	7701	9632	6993	-1.13925	1.07438	0.064876	12.4063	13.5316	13.0184
chr6	89364616	89412273	47658	-	RRAGD	protein_coding	ENSG00000025039	ENSG00000025039.15	169.202	4.66179	-0.126268	4.92086	2.33123e-42	0.68243	2.08247e-43	TRUE	FALSE	TRUE	up.late	16	19	22	17	14	14	444	536	399	-0.636833	-0.688821	1.32565	6.98271	6.92219	9.26704
chr6	122399551	122433119	33569	+	HSF2	protein_coding	ENSG00000025156	ENSG00000025156.13	420.901	0.492494	0.263901	0.177235	0.00121612	0.0875353	0.286914	TRUE	FALSE	FALSE	up.early	295	331	410	328	545	472	422	526	491	-1.13664	0.120586	1.01605	8.91947	9.15598	9.32445
chr22	50525752	50530032	4281	-	TYMP	protein_coding	ENSG00000025708	ENSG00000025708.14	560.072	-0.696279	-2.15255	1.22427	0.0095809	1.02363e-12	3.90298e-05	TRUE	TRUE	TRUE	down.early	754	1248	938	246	175	158	664	678	285	1.03903	-1.10151	0.0624782	10.1051	8.39634	9.32551
chr22	50508224	50524780	16557	+	NCAPH2	protein_coding	ENSG00000025770	ENSG00000025770.19	2649.24	-0.522043	-0.229792	-0.219317	0.00468806	0.218443	0.252739	TRUE	FALSE	FALSE	down.early	2698	4003	2962	3002	3135	2025	1910	2051	2204	0.930796	-0.0518143	-0.878982	11.7064	11.4083	11.1573
chr20	44942130	44960397	18268	-	TOMM34	protein_coding	ENSG00000025772	ENSG00000025772.8	2711.91	0.320085	0.0537492	0.249602	0.00783575	0.747448	0.042221	TRUE	FALSE	FALSE	up.late	2061	2728	2546	2386	3170	2345	2927	3472	2903	-0.784999	-0.425022	1.21002	11.3487	11.4072	11.6731
chr10	17228241	17237593	9353	+	VIM	protein_coding	ENSG00000026025	ENSG00000026025.16	21501.7	4.17358	6.91816	-2.72726	3.54869e-109	1.65581e-299	1.64444e-49	TRUE	TRUE	TRUE	up.early	342	447	557	56239	63159	52508	8701	10162	6036	-1.20751	1.08706	0.120452	9.22255	15.7708	13.0123
chr6	166922113	166957191	35079	-	RNASET2	protein_coding	ENSG00000026297	ENSG00000026297.16	410.817	0.147405	-0.574944	0.754524	0.45325	0.000683722	8.21073e-06	FALSE	TRUE	TRUE	up.late	290	516	505	329	329	233	480	543	498	0.363698	-1.21797	0.854276	9.19892	8.72785	9.34503
chr11	35138882	35232402	93521	+	CD44	protein_coding	ENSG00000026508	ENSG00000026508.20	23344.4	0.988635	0.47601	0.436584	6.06806e-12	0.000977217	0.00254834	TRUE	TRUE	TRUE	up.early	14624	13691	18487	18594	31880	27274	24218	32397	29034	-1.12319	0.0301679	1.09303	13.9323	14.4692	14.964
chr20	51003656	51023107	19452	-	KCNG1	protein_coding	ENSG00000026559	ENSG00000026559.14	96.1	5.36974	1.76604	3.38175	1.56984e-36	6.21052e-05	5.139e-31	TRUE	TRUE	TRUE	up.late	4	4	9	20	26	23	282	362	254	-0.874743	-0.430915	1.30566	6.67506	7.07453	8.63756
chr6	161129967	161274061	144095	-	AGPAT4	protein_coding	ENSG00000026652	ENSG00000026652.15	624.031	0.920825	1.28935	-0.23913	3.16157e-05	1.67311e-08	0.271129	TRUE	TRUE	FALSE	up.early	262	316	405	905	988	916	594	775	511	-1.1741	0.886871	0.287227	8.88808	9.97732	9.6604
chr1	160739057	160754821	15765	+	SLAMF7	protein_coding	ENSG00000026751	ENSG00000026751.17	15.3799	6.0781	5.89258	0.00671726	9.44814e-07	1.33404e-06	0.991946	TRUE	TRUE	FALSE	up.early	0	0	0	24	26	17	16	19	35	-1.28467	0.635556	0.649109	6.28361	7.04594	7.05132
chr6	26402237	26415208	12972	+	BTN3A1	protein_coding	ENSG00000026950	ENSG00000026950.17	398.275	0.762055	0.0449029	0.63767	0.00635272	0.88532	0.0166426	TRUE	FALSE	FALSE	up.late	253	240	354	315	398	336	521	772	332	-0.519796	-0.419854	0.93965	8.7813	8.82604	9.43465
chr13	23730189	23889400	159212	-	MIPEP	protein_coding	ENSG00000027001	ENSG00000027001.10	1430.4	-0.480453	-0.0475933	-0.404153	0.000702456	0.809366	0.00393537	TRUE	FALSE	TRUE	down.late	1328	1609	1933	1358	1863	1490	984	1225	1169	0.714567	0.50035	-1.21492	10.7823	10.7308	10.318
chr14	61187559	61550976	363418	+	PRKCH	protein_coding	ENSG00000027075	ENSG00000027075.15	407.294	1.07325	-0.159355	1.34239	3.55492e-07	0.476912	1.38113e-09	TRUE	FALSE	TRUE	up.late	257	306	415	184	211	191	749	890	732	-0.48067	-0.776682	1.25735	8.76866	8.61443	9.67423
chr6	137197485	137219449	21965	-	IFNGR1	protein_coding	ENSG00000027697	ENSG00000027697.15	1246.21	0.35387	0.61067	-0.219869	0.0767719	0.00134233	0.271611	FALSE	TRUE	FALSE	up.early	713	894	1217	1211	1692	1807	1252	1363	1131	-1.00298	0.877108	0.125873	10.0825	10.7043	10.4558
chr1	156806243	156816848	10606	-	SH2D2A	protein_coding	ENSG00000027869	ENSG00000027869.12	147.493	0.140215	1.53747	-1.34087	0.628993	8.00545e-09	5.18951e-07	FALSE	TRUE	TRUE	down.late	57	103	98	309	302	228	94	90	82	-0.739466	1.26233	-0.522864	7.71492	8.64151	7.81518
chr12	95217746	95302799	85054	+	VEZT	protein_coding	ENSG00000028203	ENSG00000028203.18	2623.74	0.24742	-0.236437	0.508721	0.220978	0.214397	0.00539973	FALSE	FALSE	TRUE	up.late	2228	2571	3120	1541	2526	2193	2911	3532	3021	0.0241112	-0.931887	0.907776	11.4164	11.1035	11.7057
chr19	42086110	42196585	110476	-	POU2F2	protein_coding	ENSG00000028277	ENSG00000028277.21	42.7046	1.45252	-0.100144	1.73258	7.51046e-05	0.755361	9.59388e-06	TRUE	FALSE	TRUE	up.late	18	28	27	22	17	25	90	77	81	-0.546975	-0.716951	1.26393	7.08939	7.03281	7.69225
chr12	27332854	27425289	92436	+	BMAL2	protein_coding	ENSG00000029153	ENSG00000029153.14	4676.84	0.499106	-0.730717	1.35217	0.0095927	0.000123844	6.01879e-12	TRUE	TRUE	TRUE	up.late	4274	4821	4713	2068	3714	2332	5611	7175	7090	0.121424	-1.14664	1.02522	12.2001	11.4023	12.7687
chr8	41653220	41896762	243543	-	ANK1	protein_coding	ENSG00000029534	ENSG00000029534.21	34.7246	1.23979	3.33541	-1.40299	0.00633413	2.65927e-10	0.00167655	TRUE	TRUE	TRUE	up.early	7	7	11	90	103	96	14	20	7	-0.959706	1.19586	-0.236157	6.71566	7.63892	7.02557
chr6	155256134	155314493	58360	-	TFB1M	protein_coding	ENSG00000029639	ENSG00000029639.11	874.672	0.918348	0.120417	0.756662	8.26596e-10	0.504861	3.94828e-07	TRUE	FALSE	TRUE	up.late	550	657	724	596	992	688	1255	1372	1055	-0.789981	-0.487069	1.27705	9.63048	9.7523	10.4617
chr17	5282265	5386340	104076	+	RABEP1	protein_coding	ENSG00000029725	ENSG00000029725.17	1902.58	0.372631	0.549379	-0.161132	0.0239786	0.000497979	0.371939	FALSE	TRUE	FALSE	up.early	1220	1459	1751	1772	3024	2470	1674	1932	2041	-1.1024	0.872311	0.230092	10.6662	11.2285	11.0456
chr6	33572547	33580293	7747	-	BAK1	protein_coding	ENSG00000030110	ENSG00000030110.13	2291.1	0.491247	0.375315	0.0807911	0.00049698	0.0071529	0.662674	TRUE	TRUE	FALSE	up.early	1532	1977	1902	2335	3071	2133	2600	2979	2230	-1.18981	0.416347	0.773459	10.9404	11.3401	11.4289
chr2	212999691	213152427	152737	-	IKZF2	protein_coding	ENSG00000030419	ENSG00000030419.16	2282.21	-0.559572	-1.13492	0.416543	0.0141862	1.59687e-06	0.054501	FALSE	TRUE	FALSE	down.early	2237	3426	4504	966	1400	1684	2084	2301	2166	1.04378	-1.00851	-0.0352718	11.7592	10.5606	11.129
chr3	119294383	119420714	126332	+	ARHGAP31	protein_coding	ENSG00000031081	ENSG00000031081.11	602.472	-3.41083	0.23905	-3.79217	2.74514e-31	0.314465	2.2313e-38	TRUE	FALSE	TRUE	down.late	689	757	900	1059	1043	1233	39	72	69	0.516658	0.784956	-1.30161	9.80812	10.1314	7.61715
chr14	58298504	58373887	75384	+	ARID4A	protein_coding	ENSG00000032219	ENSG00000032219.19	532.864	-0.462306	-0.40787	-0.0212455	0.00764788	0.015012	0.937301	TRUE	FALSE	FALSE	down.early	544	733	836	332	556	484	481	466	438	1.15363	-0.536748	-0.616879	9.66163	9.26544	9.24666
chr2	3188925	3377830	188906	-	EIPR1	protein_coding	ENSG00000032389	ENSG00000032389.13	1595.9	0.453324	-0.045641	0.488424	0.00213404	0.823671	0.000664999	TRUE	FALSE	TRUE	up.late	1205	1664	1420	1442	1537	1214	1872	2137	1860	-0.50505	-0.708191	1.21324	10.6154	10.5614	11.0721
chr13	20567138	20691444	124307	+	IFT88	protein_coding	ENSG00000032742	ENSG00000032742.18	458.791	-0.80926	-0.189417	-0.536836	4.41372e-06	0.307615	0.00199987	TRUE	FALSE	TRUE	down.late	444	581	729	417	578	512	294	326	292	0.897715	0.288968	-1.18668	9.49379	9.30007	8.83046
chr16	5033923	5087379	53457	+	ALG1	protein_coding	ENSG00000033011	ENSG00000033011.13	1451.43	-0.788405	-0.250694	-0.452465	2.08222e-06	0.140919	0.00603903	TRUE	FALSE	TRUE	down.early	1589	2178	1963	1661	1576	1231	847	915	1238	0.970448	0.170568	-1.14102	10.9652	10.6697	10.1851
chr7	151232489	151238827	6339	+	CHPF2	protein_coding	ENSG00000033100	ENSG00000033100.16	2943.69	-0.529343	-0.099541	-0.384345	0.000658115	0.599786	0.0125757	TRUE	FALSE	FALSE	down.late	2533	3959	3908	3635	3103	2833	2071	2425	2236	0.805209	0.334202	-1.13941	11.7982	11.6664	11.2541
chr14	65410592	65744121	333530	+	FUT8	protein_coding	ENSG00000033170	ENSG00000033170.17	1287.81	1.41575	0.68318	0.652347	3.15312e-23	2.00379e-06	3.22724e-06	TRUE	TRUE	TRUE	up.early	483	744	831	1104	1493	1182	2002	2311	1686	-1.13667	-0.000704331	1.13737	9.74872	10.3934	11.0393
chr4	67612652	67701155	88504	-	UBA6	protein_coding	ENSG00000033178	ENSG00000033178.13	4369.2	0.33094	-0.191593	0.541832	0.0536065	0.275511	0.00078008	FALSE	FALSE	TRUE	up.late	3479	4056	4753	2411	4648	3776	5311	5957	5322	-0.132951	-0.918605	1.05156	12.0734	11.8323	12.437
chr11	78215293	78418348	203056	-	GAB2	protein_coding	ENSG00000033327	ENSG00000033327.13	112.039	1.26417	0.0159745	1.25817	0.000244219	0.966135	0.000393878	TRUE	FALSE	TRUE	up.late	62	65	48	60	111	64	185	252	156	-0.626886	-0.552377	1.17926	7.56945	7.60254	8.37139
chr15	68054309	68198603	144295	+	PIAS1	protein_coding	ENSG00000033800	ENSG00000033800.14	1594.7	-0.49799	0.140474	-0.653115	0.00108923	0.416164	1.07269e-05	TRUE	FALSE	TRUE	down.late	1357	1815	2130	1510	2164	2136	1037	1144	1226	0.334601	0.866246	-1.20085	10.8471	11.0162	10.3588
chr3	27372721	27484420	111700	-	SLC4A7	protein_coding	ENSG00000033867	ENSG00000033867.16	2809.23	0.780447	0.0264958	0.716936	0.000303226	0.926441	0.000777152	TRUE	FALSE	TRUE	up.late	1767	2103	2562	1405	3296	2190	3365	3826	5199	-0.565147	-0.567908	1.13305	11.183	11.1816	12.0077
chr17	21284672	21315232	30561	+	MAP2K3	protein_coding	ENSG00000034152	ENSG00000034152.19	4967.66	1.17174	-0.0377293	1.22865	3.35216e-19	0.846699	1.5271e-20	TRUE	FALSE	TRUE	up.late	2686	3803	3875	3468	4058	3030	7576	9245	7031	-0.617541	-0.696064	1.31361	11.8297	11.7823	12.9952
chr8	48710789	48735311	24523	-	CLXN	protein_coding	ENSG00000034239	ENSG00000034239.11	15.4876	-2.47459	2.58404	-6.01008	0.00729459	1.88292e-05	6.34742e-07	TRUE	TRUE	TRUE	down.late	4	6	10	30	24	38	0	0	1	-0.238788	1.23542	-0.996632	6.65931	7.30041	6.32974
chr16	75566375	75577881	11507	+	GABARAPL2	protein_coding	ENSG00000034713	ENSG00000034713.8	1668.48	-0.26964	-0.547103	0.254237	0.09162	0.000233468	0.107071	FALSE	TRUE	FALSE	down.early	1724	2020	2317	1296	1491	1289	1651	1912	1339	1.04732	-1.02139	-0.0259258	11.0898	10.5334	10.8012
chr2	217730	266398	48669	-	SH3YL1	protein_coding	ENSG00000035115	ENSG00000035115.22	1535.65	0.532677	-0.931584	1.57557	0.00464168	8.80083e-07	2.3385e-16	TRUE	TRUE	TRUE	up.late	1144	1488	1814	682	975	876	2138	2554	1832	0.180747	-1.18394	1.0032	10.7111	9.82343	11.2461
chr2	70295975	70302090	6116	-	FAM136A	protein_coding	ENSG00000035141	ENSG00000035141.8	2131.13	0.6018	0.231488	0.293743	0.000501765	0.192899	0.093238	TRUE	FALSE	FALSE	up.early	1519	1769	1753	1795	2636	1939	2104	2478	3235	-0.951206	-0.0594082	1.01061	10.8337	11.1085	11.4382
chr10	73995193	74121363	126171	+	VCL	protein_coding	ENSG00000035403	ENSG00000035403.18	11172.9	0.916634	0.722273	0.127396	6.14887e-06	0.000345046	0.580547	TRUE	TRUE	FALSE	up.early	6119	7416	7993	11679	15120	12018	11456	14806	12585	-1.15812	0.379217	0.7789	12.799	13.5829	13.7867
chr5	60596912	60700190	103279	-	DEPDC1B	protein_coding	ENSG00000035499	ENSG00000035499.13	1270.84	0.320003	-0.12126	0.444797	0.076143	0.545687	0.00871335	FALSE	FALSE	TRUE	up.late	1027	1440	1124	944	1422	906	1554	1578	1479	-0.253529	-0.78946	1.04299	10.3862	10.2453	10.7271
chr15	63907036	64072033	164998	-	DAPK2	protein_coding	ENSG00000035664	ENSG00000035664.11	109.502	-2.44991	-0.0189092	-2.38523	2.92832e-07	0.960096	6.33334e-07	TRUE	FALSE	TRUE	down.late	79	197	226	165	138	176	23	24	11	0.615405	0.559833	-1.17524	8.14359	8.11024	7.06923
chr8	58583508	58659853	76346	-	NSMAF	protein_coding	ENSG00000035681	ENSG00000035681.9	1962.09	-0.767835	-0.125311	-0.554133	0.000228618	0.585057	0.00601306	TRUE	FALSE	TRUE	down.late	2236	2093	2634	1653	2714	2322	1138	1413	1394	0.756352	0.327649	-1.084	11.3139	11.1308	10.5278
chr17	78852977	78925387	72411	-	TIMP2	protein_coding	ENSG00000035862	ENSG00000035862.12	4640.9	-0.177715	0.392692	-0.599328	0.345995	0.0168824	0.000251795	FALSE	FALSE	TRUE	down.late	3727	4129	4934	5317	6667	6188	3437	4638	2978	-0.243077	1.11293	-0.869849	12.1101	12.5692	11.8979
chr3	100260992	100325251	64260	+	TBC1D23	protein_coding	ENSG00000036054	ENSG00000036054.13	1383.86	0.120156	-0.410968	0.548943	0.516753	0.0074631	0.000311788	FALSE	TRUE	TRUE	up.late	1233	1355	1733	771	1238	1236	1690	1749	1537	0.367895	-1.17035	0.802455	10.6635	10.2346	10.7846
chr17	42659284	42667006	7723	+	TUBG2	protein_coding	ENSG00000037042	ENSG00000037042.9	465.215	0.764438	0.351289	0.341295	2.64857e-07	0.0196836	0.0226327	TRUE	FALSE	FALSE	up.early	261	366	382	415	517	471	580	675	549	-1.11298	-0.00877981	1.12176	8.91902	9.22788	9.5441
chr19	13764522	13774282	9761	+	MRI1	protein_coding	ENSG00000037757	ENSG00000037757.14	1766.16	0.614715	0.365932	0.182423	0.000186763	0.0246175	0.311364	TRUE	FALSE	FALSE	up.early	990	1649	1402	2134	1915	1415	2041	2429	2064	-1.10147	0.185197	0.916269	10.5386	10.9343	11.1591
chr12	57768471	57772119	3649	-	METTL1	protein_coding	ENSG00000037897	ENSG00000037897.17	566.172	0.0901307	0.533012	-0.421844	0.689244	0.00256551	0.0165367	FALSE	TRUE	FALSE	down.late	429	528	455	726	894	577	439	495	572	-0.726029	1.13383	-0.407801	9.26022	9.75999	9.34573
chr12	54008985	54012769	3785	+	HOXC8	protein_coding	ENSG00000037965	ENSG00000037965.6	251.373	-0.801446	1.07066	-1.97559	1.64133e-05	1.21206e-09	1.04842e-26	TRUE	TRUE	TRUE	down.late	168	245	191	427	516	414	92	117	119	-0.17184	1.22215	-1.05031	8.40637	9.19894	7.90691
chr4	177430774	177442437	11664	-	AGA	protein_coding	ENSG00000038002	ENSG00000038002.9	296.427	-0.975206	-0.950665	-0.018131	4.05025e-07	9.49304e-07	0.952122	TRUE	TRUE	FALSE	down.early	418	452	529	206	246	223	177	213	225	1.2713	-0.618243	-0.653055	9.2169	8.48543	8.47195
chr4	165873237	166104457	231221	+	TLL1	protein_coding	ENSG00000038295	ENSG00000038295.8	51.7416	0.439326	1.17377	-0.45326	0.150065	0.000374974	0.0966589	FALSE	TRUE	FALSE	up.early	36	40	33	76	103	73	26	31	51	-0.95837	1.08812	-0.129751	7.16101	7.67058	7.36733
chr16	67873052	67884499	11448	+	EDC4	protein_coding	ENSG00000038358	ENSG00000038358.15	3576.42	-0.539875	-0.483123	-0.0316457	0.000201886	0.000729919	0.886853	TRUE	TRUE	FALSE	down.early	3611	4839	4805	3040	3895	3007	2435	3262	3342	1.21972	-0.540217	-0.679503	12.1991	11.6773	11.636
chr5	83471618	83582303	110686	+	VCAN	protein_coding	ENSG00000038427	ENSG00000038427.16	719.519	1.80113	5.61398	-3.72662	2.91687e-09	4.39834e-79	1.52971e-45	TRUE	TRUE	TRUE	up.early	40	24	27	1276	2860	2088	184	223	166	-0.885243	1.29711	-0.411866	7.31038	11.0469	8.12088
chr16	10944564	11182186	237623	+	CLEC16A	protein_coding	ENSG00000038532	ENSG00000038532.16	2238.38	-1.13719	-0.937105	-0.153891	3.48229e-12	1.08252e-08	0.411496	TRUE	TRUE	FALSE	down.early	2895	3812	4031	1873	2235	1921	1086	1337	1392	1.26863	-0.470633	-0.797994	11.8121	10.8763	10.7001
chr16	68737292	68835541	98250	+	CDH1	protein_coding	ENSG00000039068	ENSG00000039068.19	12361.5	-1.38542	-2.69942	1.24846	4.35857e-15	2.46674e-52	3.57572e-12	TRUE	TRUE	TRUE	down.early	20982	24359	27719	2996	5244	3494	6811	9859	9552	1.1594	-1.12117	-0.0382311	14.578	11.883	13.1628
chr5	13690331	13944543	254213	-	DNAH5	protein_coding	ENSG00000039139	ENSG00000039139.9	112.79	0.049623	-0.89186	0.996542	0.886124	0.00217794	0.000830038	FALSE	TRUE	TRUE	up.late	75	99	142	60	76	75	145	191	135	0.506461	-1.13465	0.628186	8.05325	7.52579	8.09237
chr5	80408013	80483379	75367	+	ZFYVE16	protein_coding	ENSG00000039319	ENSG00000039319.17	1371.93	-0.335074	-0.469927	0.129625	0.0679592	0.00660342	0.529831	FALSE	TRUE	FALSE	down.early	1304	1711	2006	793	1654	1390	1164	1182	1278	1.03058	-0.788716	-0.241866	10.8313	10.3336	10.4832
chr5	34656328	34832612	176285	+	RAI14	protein_coding	ENSG00000039560	ENSG00000039560.14	3266	1.76059	0.183461	1.52256	3.20527e-25	0.31279	4.5739e-19	TRUE	FALSE	TRUE	up.late	1391	1836	2145	1610	2846	2074	5096	6633	5260	-0.790334	-0.506491	1.29682	10.8693	11.1024	12.5832
chr19	12751702	12758458	6757	+	BEST2	protein_coding	ENSG00000039987	ENSG00000039987.7	22.6943	-4.12285	2.41524	-7.08875	0.000696981	0.000637745	1.78308e-08	TRUE	TRUE	TRUE	down.late	2	18	3	74	30	76	0	0	0	-0.236107	1.17384	-0.937737	6.68153	7.48116	6.28361
chr16	71637835	71724701	86867	-	PHLPP2	protein_coding	ENSG00000040199	ENSG00000040199.18	1580.41	-1.93984	-1.08551	-0.750926	4.97271e-30	1.39609e-10	8.58004e-06	TRUE	TRUE	TRUE	down.early	2355	2858	3035	1148	1485	1221	521	713	908	1.19721	-0.134242	-1.06297	11.5141	10.4612	9.72676
chr8	73420369	73747708	327340	-	STAU2	protein_coding	ENSG00000040341	ENSG00000040341.18	1390.38	-0.485492	-0.673158	0.165189	0.00100268	3.43676e-06	0.320166	TRUE	TRUE	FALSE	down.early	1375	1767	2174	853	1391	1301	1146	1360	1206	1.20713	-0.89735	-0.309776	10.9393	10.2775	10.4623
chr1	19312326	19329300	16975	+	SLC66A1	protein_coding	ENSG00000040487	ENSG00000040487.13	535.916	-0.361506	0.220906	-0.613412	0.0489717	0.224101	0.000404518	FALSE	FALSE	TRUE	down.late	455	673	522	741	656	559	393	389	438	0.11408	0.956775	-1.07086	9.42282	9.65117	9.10174
chr17	7235029	7239722	4694	-	PHF23	protein_coding	ENSG00000040633	ENSG00000040633.13	1182.63	-0.0249054	0.738736	-0.764505	0.911898	2.36006e-06	9.50855e-07	FALSE	TRUE	TRUE	down.late	839	1117	1251	1443	1796	1447	719	934	1055	-0.587919	1.2647	-0.676784	10.1068	10.8216	10.0725
chr5	24487100	24644978	157879	-	CDH10	protein_coding	ENSG00000040731	ENSG00000040731.10	9.7649	3.32	1.92924	0.244194	0.000598175	0.00945994	0.470789	TRUE	TRUE	FALSE	up.early	0	3	0	7	17	8	22	24	11	-1.18212	0.301865	0.880257	6.37819	6.79942	6.9636
chr18	54717860	54895516	177657	+	RAB27B	protein_coding	ENSG00000041353	ENSG00000041353.10	2043.83	0.222277	-0.608534	0.921154	0.350096	0.00480542	4.3296e-05	FALSE	TRUE	TRUE	up.late	1693	2056	2739	858	1484	1675	2412	2719	2732	0.288516	-1.11907	0.830556	11.1767	10.4534	11.4553
chr9	115019575	115118257	98683	-	TNC	protein_coding	ENSG00000041982	ENSG00000041982.16	2272.33	-0.97264	-0.481725	-0.399147	1.49073e-09	0.00257595	0.0133753	TRUE	TRUE	FALSE	down.early	2490	2957	3886	2094	2437	2138	1172	1563	1839	1.11829	-0.054731	-1.06356	11.6801	11.1596	10.7119
chr20	50586108	50691542	105435	-	RIPOR3	protein_coding	ENSG00000042062	ENSG00000042062.13	4.43211	2.89047	-0.00440718	2.73825	0.00692086	0.993318	0.00796081	TRUE	FALSE	TRUE	up.late	0	1	0	1	0	0	11	24	5	-0.590578	-0.577213	1.16779	6.34062	6.34431	6.82667
chr10	70098223	70132934	34712	-	AIFM2	protein_coding	ENSG00000042286	ENSG00000042286.15	1283.19	0.791152	0.148795	0.59352	1.93182e-08	0.363033	2.1938e-05	TRUE	FALSE	TRUE	up.late	886	1109	966	1117	1366	947	1562	1900	1696	-0.851301	-0.404372	1.25567	10.1417	10.3015	10.8952
chr14	88384924	88470350	85427	+	SPATA7	protein_coding	ENSG00000042317	ENSG00000042317.17	115.949	0.893235	1.4115	-0.279799	0.00185647	4.92115e-06	0.266145	TRUE	TRUE	FALSE	up.early	35	48	94	103	231	194	136	130	101	-1.14375	0.903886	0.239867	7.46746	8.23718	7.98757
chr2	85394753	85418432	23680	-	CAPG	protein_coding	ENSG00000042493	ENSG00000042493.16	9193.38	-0.751693	-0.279821	-0.328807	0.00121204	0.20675	0.137709	TRUE	FALSE	FALSE	down.early	8729	14914	12809	11107	8334	7887	7226	7921	4248	0.887237	0.0379709	-0.925208	13.5628	13.1384	12.6572
chr8	132866958	133134903	267946	+	TG	protein_coding	ENSG00000042832	ENSG00000042832.12	21.8052	-2.07157	0.725977	-4.14174	0.00385489	0.0727696	2.3607e-06	TRUE	FALSE	TRUE	down.late	8	14	20	57	34	35	2	1	4	-0.0671125	1.03849	-0.971373	6.8994	7.34548	6.53456
chr11	129375848	129452279	76432	+	BARX2	protein_coding	ENSG00000043039	ENSG00000043039.7	30.7691	7.02174	0.210884	5.97804	8.67012e-09	0.556465	8.90399e-10	TRUE	FALSE	TRUE	up.late	0	0	1	1	2	0	119	115	37	-0.687247	-0.58173	1.26898	6.33549	6.41062	7.72835
chr5	134524312	134583230	58919	+	JADE2	protein_coding	ENSG00000043143	ENSG00000043143.20	7508.02	-0.993063	0.142493	-1.21119	3.89041e-08	0.478512	6.52553e-11	TRUE	FALSE	TRUE	down.late	7190	9563	9564	10283	11503	9771	3363	3936	3847	0.479733	0.772045	-1.25178	13.0866	13.2607	12.0549
chr13	99981784	99986765	4982	+	ZIC2	protein_coding	ENSG00000043355	ENSG00000043355.12	304.74	2.38329	1.66255	0.504537	1.71994e-18	1.35794e-09	0.0306522	TRUE	TRUE	FALSE	up.early	86	134	149	206	293	243	429	519	481	-1.20791	0.232139	0.975768	7.78015	8.81349	9.3471
chr1	39838110	39883511	45402	-	TRIT1	protein_coding	ENSG00000043514	ENSG00000043514.17	782.729	0.116932	0.459172	-0.330142	0.502598	0.00125015	0.0235658	FALSE	TRUE	FALSE	up.early	607	716	692	959	1024	882	653	756	756	-0.85599	1.18351	-0.327523	9.66602	10.1032	9.77929
chr9	17134982	17503923	368942	+	CNTLN	protein_coding	ENSG00000044459	ENSG00000044459.15	616.441	0.466543	0.628603	-0.137332	0.0268798	0.00207217	0.55223	FALSE	TRUE	FALSE	up.early	367	480	523	527	1078	864	491	542	784	-1.03781	0.767336	0.270477	9.20801	9.79321	9.63213
chr3	89107621	89482134	374514	+	EPHA3	protein_coding	ENSG00000044524	ENSG00000044524.11	27.4827	-5.90167	-2.85744	-1.7803	1.09632e-07	5.05748e-06	0.0168529	TRUE	TRUE	FALSE	down.early	89	55	90	4	15	6	0	0	2	1.20983	-0.29813	-0.911703	7.60398	6.73213	6.37738
chr9	125234853	125241343	6491	-	HSPA5	protein_coding	ENSG00000044574	ENSG00000044574.8	27045.8	0.8053	0.586648	0.183469	2.69653e-11	1.45837e-06	0.181719	TRUE	TRUE	FALSE	up.early	14870	21301	20048	29735	35549	23836	30469	35356	34106	-1.25561	0.346981	0.908633	14.2043	14.8214	15.0376
chr18	31498177	31549008	50832	+	DSG2	protein_coding	ENSG00000046604	ENSG00000046604.13	15920.9	-1.37509	-1.63763	0.193431	5.36593e-15	2.64968e-20	0.305814	TRUE	TRUE	FALSE	down.early	22409	28459	34150	6382	12119	9100	9063	12302	10241	1.28254	-0.807735	-0.474807	14.7946	13.1164	13.3837
chrX	13770939	13938638	167700	-	GPM6B	protein_coding	ENSG00000046653	ENSG00000046653.15	66.0945	0.0998607	-1.74557	1.92314	0.769128	2.24261e-06	2.34258e-07	FALSE	TRUE	TRUE	up.late	76	88	86	22	28	19	84	108	67	0.526216	-1.22919	0.702976	7.70743	7.04189	7.77444
chr10	1049538	1132384	82847	+	WDR37	protein_coding	ENSG00000047056	ENSG00000047056.16	871.726	-0.329177	0.457841	-0.856295	0.0770531	0.0084512	1.51443e-06	FALSE	TRUE	TRUE	down.late	665	877	895	1208	1109	1180	493	681	719	-0.122726	1.11497	-0.992248	9.90535	10.3723	9.57732
chr8	53715543	53843558	128016	-	ATP6V1H	protein_coding	ENSG00000047249	ENSG00000047249.18	3139	-0.817783	-0.714689	-0.0795886	6.1167e-09	4.40325e-07	0.676044	TRUE	TRUE	FALSE	down.early	3431	5080	4784	2495	2734	2167	2564	2803	2320	1.27478	-0.528747	-0.746035	12.1518	11.4163	11.3277
chr15	52581317	52709817	128501	-	ATOSA	protein_coding	ENSG00000047346	ENSG00000047346.12	737.095	-1.21638	-0.504945	-0.536913	1.41025e-08	0.0129384	0.00844444	TRUE	FALSE	TRUE	down.early	771	999	1364	532	687	940	416	526	400	1.07183	-0.0249871	-1.04684	10.2514	9.69851	9.18344
chr3	149162410	149221829	59420	-	CP	protein_coding	ENSG00000047457	ENSG00000047457.14	81.1473	3.74285	-1.47579	5.7702	3.94867e-13	0.00492917	4.08115e-22	TRUE	TRUE	TRUE	up.late	7	13	15	3	4	6	238	325	131	-0.451711	-0.820859	1.27257	6.92443	6.59431	8.46644
chr16	27550133	27780369	230237	+	KATNIP	protein_coding	ENSG00000047578	ENSG00000047578.13	1427.23	-1.22962	-0.777717	-0.396036	4.21053e-22	9.40228e-10	0.00243093	TRUE	TRUE	TRUE	down.early	1553	2146	2391	1386	1358	1294	766	1024	872	1.24121	-0.235429	-1.00578	11.1726	10.4247	10.0345
chrX	37685791	37732130	46340	+	XK	protein_coding	ENSG00000047597	ENSG00000047597.7	362.355	1.45413	-0.00667803	1.48283	2.38442e-10	0.984472	2.22266e-10	TRUE	FALSE	TRUE	up.late	211	220	226	164	292	227	475	648	803	-0.623103	-0.646451	1.26955	8.49489	8.48113	9.61079
chrX	17737449	17754988	17540	+	SCML1	protein_coding	ENSG00000047634	ENSG00000047634.15	578.836	0.852399	0.469947	0.280161	4.11101e-06	0.00988095	0.133883	TRUE	TRUE	FALSE	up.early	348	407	489	382	765	663	625	760	790	-1.10002	0.111246	0.988769	9.07597	9.50489	9.81563
chr3	47850690	48089272	238583	-	MAP4	protein_coding	ENSG00000047849	ENSG00000047849.21	12570.5	-0.440257	0.206364	-0.673154	0.00402542	0.196789	5.30773e-06	TRUE	FALSE	TRUE	down.late	10906	13053	15071	11914	19006	16031	7754	10595	9710	0.226673	0.927238	-1.15391	13.6777	13.9204	13.1994
chr6	117287353	117425942	138590	-	ROS1	protein_coding	ENSG00000047936	ENSG00000047936.11	4991.47	-4.27951	-0.880594	-3.30684	1.49163e-103	5.33557e-06	4.13001e-62	TRUE	TRUE	TRUE	down.late	7339	8614	11150	3759	5405	5743	470	539	529	0.913022	0.374319	-1.28734	13.2403	12.2771	9.30599
chr7	18086949	19002416	915468	+	HDAC9	protein_coding	ENSG00000048052	ENSG00000048052.22	1140.53	0.258286	-3.20637	3.5207	0.195028	5.05957e-59	3.33024e-71	FALSE	TRUE	TRUE	up.late	1322	1294	1448	120	246	182	1568	1909	1563	0.550126	-1.31884	0.768717	10.6452	8.16694	10.935
chr5	176647387	176659054	11668	+	TSPAN17	protein_coding	ENSG00000048140	ENSG00000048140.18	3032.55	-0.726073	-0.199988	-0.468898	2.35037e-07	0.1895	0.00083752	TRUE	FALSE	TRUE	down.late	2918	4382	3748	3533	3409	2720	2060	2240	2352	0.940408	0.257362	-1.19777	11.9246	11.6909	11.1929
chr4	15469865	15601552	131688	+	CC2D2A	protein_coding	ENSG00000048342	ENSG00000048342.17	543.012	0.566669	0.363622	0.138212	0.00147611	0.0367489	0.495749	TRUE	FALSE	FALSE	up.early	396	399	483	493	765	597	499	592	664	-1.10518	0.257433	0.847748	9.12654	9.47639	9.62795
chr7	127346790	127431924	85135	-	ZNF800	protein_coding	ENSG00000048405	ENSG00000048405.10	1736.11	-0.671479	-0.294419	-0.323864	2.06661e-07	0.0264263	0.0154383	TRUE	FALSE	FALSE	down.early	1698	2375	2582	1536	1835	1742	1320	1278	1368	1.0931	0.0294434	-1.12255	11.1792	10.8655	10.5258
chr6	42206807	42217861	11055	-	MRPS10	protein_coding	ENSG00000048544	ENSG00000048544.6	2436.65	0.432082	-0.0429788	0.460707	0.0104309	0.849714	0.00460122	FALSE	FALSE	TRUE	up.late	1739	2239	2553	1594	2759	2118	2613	3655	2855	-0.446331	-0.676799	1.12313	11.1841	11.1176	11.6372
chr9	93451685	93566112	114428	+	FAM120A	protein_coding	ENSG00000048828	ENSG00000048828.17	14347	0.457254	0.543393	-0.0846965	0.000176958	5.4534e-06	0.59489	TRUE	TRUE	FALSE	up.early	8818	11178	12410	13560	21140	16297	13375	17970	16169	-1.25558	0.804367	0.451209	13.4513	14.0247	13.9264
chr12	88492793	88580851	88059	-	KITLG	protein_coding	ENSG00000049130	ENSG00000049130.16	1183.65	1.15688	0.575581	0.437117	6.1799e-09	0.00301598	0.0218927	TRUE	TRUE	FALSE	up.early	633	732	775	798	1454	1298	1388	1673	1938	-1.08306	0.0398621	1.04319	9.75373	10.3235	10.8325
chr5	65148738	65481920	333183	-	ADAMTS6	protein_coding	ENSG00000049192	ENSG00000049192.15	252.214	-1.00893	0.141512	-1.29017	9.67942e-05	0.578978	2.50048e-06	TRUE	FALSE	TRUE	down.late	314	268	300	222	438	282	126	101	190	0.406434	0.773276	-1.17971	8.73505	8.90085	8.01817
chr1	9234774	9271337	36564	+	H6PD	protein_coding	ENSG00000049239	ENSG00000049239.13	2214.66	-0.322064	0.282901	-0.666655	0.169213	0.192166	0.00258992	FALSE	FALSE	TRUE	down.late	1414	2517	2608	3428	2616	2727	1583	2220	1074	0.0220969	0.887496	-0.909593	11.163	11.54	10.7571
chr1	7784320	7845177	60858	+	PER3	protein_coding	ENSG00000049246	ENSG00000049246.14	211.3	3.55418	0.872417	2.42519	2.22544e-29	0.00281092	2.33669e-17	TRUE	TRUE	TRUE	up.late	31	32	24	88	108	127	597	712	439	-0.874736	-0.40231	1.27705	7.31698	7.75732	9.32261
chr17	50532682	50543750	11069	+	EPN3	protein_coding	ENSG00000049283	ENSG00000049283.18	721.845	0.0573823	-1.15057	1.225	0.75098	3.5399e-17	4.41414e-19	FALSE	TRUE	TRUE	up.late	719	993	960	378	511	335	755	871	954	0.605525	-1.32001	0.714486	9.99489	9.04272	10.0488
chr2	32946953	33399509	452557	+	LTBP1	protein_coding	ENSG00000049323	ENSG00000049323.16	4145.84	0.464627	4.88933	-4.38716	0.00136059	7.91387e-285	3.06296e-232	TRUE	TRUE	TRUE	down.late	402	377	504	11557	12029	10786	406	529	569	-0.75495	1.32808	-0.573129	9.04745	13.507	9.43671
chr11	32091074	32105722	14649	+	RCN1	protein_coding	ENSG00000049449	ENSG00000049449.10	5456.29	0.626669	0.758381	-0.11686	3.21793e-07	4.98511e-10	0.440709	TRUE	TRUE	FALSE	up.early	3386	3982	3909	6037	7578	6529	5771	6590	5523	-1.28107	0.822761	0.458311	11.9444	12.717	12.5832
chr7	74231499	74254458	22960	-	RFC2	protein_coding	ENSG00000049541	ENSG00000049541.11	1898.23	-0.641314	-0.628268	0.00252092	0.000209216	0.000245625	0.996629	TRUE	TRUE	FALSE	down.early	2249	2943	2349	1553	2062	1311	1364	1497	1760	1.1978	-0.604101	-0.593695	11.3992	10.7374	10.7412
chr6	156776020	157210779	434760	+	ARID1B	protein_coding	ENSG00000049618	ENSG00000049618.24	3547.99	-0.59297	-0.0232598	-0.549014	5.35721e-06	0.907282	2.00323e-05	TRUE	FALSE	TRUE	down.late	3435	4101	4966	3150	4855	4178	2070	2782	2861	0.678031	0.592077	-1.27011	12.0368	12.0101	11.4318
chr18	58044226	58401540	357315	+	NEDD4L	protein_coding	ENSG00000049759	ENSG00000049759.19	7193.84	0.443124	-1.10737	1.58606	0.000173491	6.73302e-22	2.08312e-43	TRUE	TRUE	TRUE	up.late	5841	8030	9940	2822	4774	3519	8309	10433	10984	0.301977	-1.26916	0.967182	12.9171	11.8216	13.3809
chrX	49269793	49301461	31669	+	PPP1R3F	protein_coding	ENSG00000049769	ENSG00000049769.14	147.048	-0.361199	0.394931	-0.919113	0.195004	0.115044	0.00137311	FALSE	FALSE	TRUE	down.late	112	190	147	240	151	128	121	110	84	-0.0775947	0.9513	-0.873705	8.0687	8.4105	7.80422
chr11	11956207	12009769	53563	-	DKK3	protein_coding	ENSG00000050165	ENSG00000050165.18	91.1153	-3.53304	5.39846	-9.06973	0.00038157	2.82621e-20	2.2376e-21	TRUE	TRUE	TRUE	down.late	5	2	5	229	203	234	0	0	2	-0.47656	1.28932	-0.812758	6.6858	8.62447	6.31671
chr7	144355288	144380632	25345	+	ARHGEF5	protein_coding	ENSG00000050327	ENSG00000050327.15	2845.34	-0.852945	-1.12249	0.236081	1.02706e-14	3.32316e-24	0.0519412	TRUE	TRUE	FALSE	down.early	3616	4661	4748	1826	2531	1877	1808	2424	2320	1.29308	-0.894724	-0.398354	12.1138	11.026	11.2728
chr7	26152198	26187137	34940	+	NFE2L3	protein_coding	ENSG00000050344	ENSG00000050344.9	1958.86	3.31893	-0.083471	3.44089	5.40856e-60	0.73035	2.59787e-64	TRUE	FALSE	TRUE	up.late	439	446	491	380	600	414	5204	5616	4312	-0.632327	-0.690981	1.32331	9.2937	9.20324	12.3099
chr12	50175788	50283546	107759	-	LIMA1	protein_coding	ENSG00000050405	ENSG00000050405.13	5937.31	2.60059	0.569231	1.94289	8.08215e-53	0.000703686	3.95726e-30	TRUE	TRUE	TRUE	up.late	1779	2044	2615	2436	4004	3182	11683	15075	10071	-0.905938	-0.377332	1.28327	11.0938	11.7046	13.6233
chr12	51391317	51515763	124447	+	SLC4A8	protein_coding	ENSG00000050438	ENSG00000050438.17	55.7251	-1.09215	0.26155	-1.74822	0.00339617	0.352943	2.53295e-05	TRUE	FALSE	TRUE	down.late	38	42	47	122	137	160	11	22	23	0.240955	0.8811	-1.12205	7.49942	7.71148	7.0479
chr16	56932142	56944864	12723	+	HERPUD1	protein_coding	ENSG00000051108	ENSG00000051108.15	1161.19	-0.606362	-0.343348	-0.16788	0.00458536	0.0929365	0.460099	TRUE	FALSE	FALSE	down.early	1256	1452	1692	903	1249	1147	928	1207	625	0.978261	-0.163643	-0.814618	10.6745	10.2586	10.0214
chr19	18929201	18941261	12061	-	HOMER3	protein_coding	ENSG00000051128	ENSG00000051128.19	1559.16	0.160335	0.371023	-0.20596	0.300097	0.00593988	0.161463	FALSE	TRUE	FALSE	up.early	1171	1592	1387	1857	1973	1508	1569	1715	1303	-0.952329	1.07232	-0.119996	10.5487	10.9337	10.707
chr3	121431427	121546641	115215	-	POLQ	protein_coding	ENSG00000051341	ENSG00000051341.14	1606.95	0.324709	-0.263187	0.634933	0.126802	0.192064	0.00148649	FALSE	FALSE	TRUE	up.late	1284	1560	1536	897	1750	1061	1713	1991	2980	-0.0138266	-0.921927	0.935754	10.7331	10.401	11.0804
chr3	138652698	138834928	182231	-	PIK3CB	protein_coding	ENSG00000051382	ENSG00000051382.9	1995.36	0.23629	-0.339574	0.605812	0.159611	0.0283453	7.00702e-05	FALSE	FALSE	TRUE	up.late	1646	2008	2425	1251	1896	1530	2062	2695	2536	0.141316	-1.10575	0.964436	11.0842	10.7049	11.3345
chr16	88643289	88651054	7766	-	CYBA	protein_coding	ENSG00000051523	ENSG00000051523.11	1805.48	-9.62328	-9.89547	0.104636	3.95934e-131	1.97649e-151	0.760134	TRUE	TRUE	FALSE	down.early	3094	5828	4853	11	3	6	3	8	7	1.33159	-0.670759	-0.660827	12.4284	6.65536	6.684
chr12	123152320	123244014	91695	-	MPHOSPH9	protein_coding	ENSG00000051825	ENSG00000051825.15	1503.52	0.428342	0.457986	-0.044015	0.0136459	0.00610421	0.856335	FALSE	TRUE	FALSE	up.early	975	1309	1429	1103	2385	1794	1461	1711	1533	-1.10235	0.615358	0.486989	10.3672	10.8391	10.8038
chr12	19129752	19376400	246649	+	PLEKHA5	protein_coding	ENSG00000052126	ENSG00000052126.14	1587.58	-0.903331	-0.189457	-0.629687	4.48945e-07	0.317315	0.000360482	TRUE	FALSE	TRUE	down.late	1530	2011	2379	1330	2192	2043	961	1084	932	0.881	0.2927	-1.1737	11.088	10.8354	10.2056
chr16	31131433	31135727	4295	-	PRSS8	protein_coding	ENSG00000052344	ENSG00000052344.16	3325.52	-1.75957	-3.77464	1.89462	5.94462e-11	7.01501e-44	3.96501e-12	TRUE	TRUE	TRUE	down.early	5196	8847	8351	580	553	477	2286	2816	1069	1.14853	-1.1029	-0.0456273	12.8746	9.38935	11.026
chr1	114769479	114780685	11207	-	SIKE1	protein_coding	ENSG00000052723	ENSG00000052723.12	1322.75	0.591507	0.112369	0.399482	0.00440443	0.631567	0.0458333	TRUE	FALSE	FALSE	up.late	1026	1193	1512	865	1682	1350	1192	1430	1476	-0.699459	-0.310742	1.0102	10.2398	10.3767	10.842
chr4	165327667	165343164	15498	+	MSMO1	protein_coding	ENSG00000052802	ENSG00000052802.13	8101.99	-0.506088	0.0946012	-0.602636	5.52352e-05	0.551305	9.00018e-07	TRUE	FALSE	TRUE	down.late	6799	9293	10305	8345	10730	9797	5346	6920	5941	0.454657	0.805469	-1.26013	13.1227	13.2301	12.5979
chr14	89124871	89619149	494279	-	FOXN3	protein_coding	ENSG00000053254	ENSG00000053254.16	446.817	1.16263	1.7397	-0.456155	2.61264e-10	6.24559e-21	0.00863851	TRUE	TRUE	TRUE	up.early	169	205	237	612	773	715	365	497	458	-1.231	0.984253	0.246745	8.39004	9.67919	9.25
chr19	17215346	17219829	4484	+	USE1	protein_coding	ENSG00000053501	ENSG00000053501.13	348.377	1.13936	0.589252	0.313515	4.67808e-05	0.0216132	0.202028	TRUE	FALSE	FALSE	up.early	154	260	207	444	346	298	537	535	297	-1.00043	0.121177	0.879251	8.39419	8.92502	9.28379
chr18	23689453	23956222	266770	+	LAMA3	protein_coding	ENSG00000053747	ENSG00000053747.17	31833.9	0.303094	-0.330138	0.675796	0.0878262	0.0486398	4.76126e-05	FALSE	FALSE	TRUE	up.late	29365	30400	33875	20752	30814	23151	37524	48686	31583	0.0554312	-1.04146	0.986033	14.9439	14.5431	15.2841
chr14	57268924	57298742	29819	+	AP5M1	protein_coding	ENSG00000053770	ENSG00000053770.12	1760.63	-0.94046	-0.220074	-0.651607	7.76745e-10	0.173719	1.90844e-05	TRUE	FALSE	TRUE	down.late	1842	2347	2887	1560	2185	2305	824	953	1422	0.907841	0.321326	-1.22917	11.2362	10.9858	10.3238
chr1	36224432	36305357	80926	+	THRAP3	protein_coding	ENSG00000054118	ENSG00000054118.15	8130.81	-0.590885	0.104886	-0.709115	0.000278452	0.592496	9.34134e-06	TRUE	FALSE	TRUE	down.late	7782	8935	9889	7750	13017	9464	4575	5991	6481	0.440332	0.764154	-1.20449	13.1431	13.2687	12.5052
chr9	136848724	136851027	2304	+	PHPT1	protein_coding	ENSG00000054148	ENSG00000054148.18	2306.69	0.310419	0.651796	-0.296171	0.0983523	0.000237539	0.100449	FALSE	TRUE	FALSE	up.early	1383	1949	1918	2873	3163	2657	2540	2651	1691	-0.955311	1.02217	-0.0668628	10.8941	11.584	11.2041
chr9	137048107	137054061	5955	-	ENTPD2	protein_coding	ENSG00000054179	ENSG00000054179.12	586.44	0.0702686	-1.85317	1.94415	0.787221	1.5747e-17	3.0831e-19	FALSE	TRUE	TRUE	up.late	506	929	840	232	191	197	831	981	592	0.602412	-1.28991	0.687496	9.81133	8.40664	9.87449
chr2	159803355	159904756	101402	-	LY75	protein_coding	ENSG00000054219	ENSG00000054219.11	2103.89	0.120965	-0.432925	0.563979	0.350839	6.95486e-05	1.57633e-07	FALSE	TRUE	TRUE	up.late	1967	2440	2861	1499	1850	1706	2159	2582	1935	0.400581	-1.28322	0.882639	11.2234	10.7907	11.3473
chr1	241590102	241677376	87275	-	OPN3	protein_coding	ENSG00000054277	ENSG00000054277.14	1866.8	-2.448	-1.00488	-1.39686	2.25282e-67	5.96017e-13	2.15739e-22	TRUE	TRUE	TRUE	down.early	2711	3475	3861	1440	1925	1617	589	675	560	1.10256	0.0865626	-1.18913	11.7769	10.7949	9.56203
chr6	1609915	1613897	3983	+	FOXC1	protein_coding	ENSG00000054598	ENSG00000054598.9	1501.82	1.18161	-0.751997	2.02497	4.5098e-13	5.64616e-06	2.15568e-34	TRUE	TRUE	TRUE	up.late	950	1215	1276	552	819	638	2696	3250	2135	-0.170142	-1.04193	1.21207	10.3459	9.63946	11.4659
chr14	63761899	64226433	464535	+	SYNE2	protein_coding	ENSG00000054654	ENSG00000054654.19	4577.86	0.386226	-0.0758402	0.457816	0.00838301	0.6868	0.00118571	TRUE	FALSE	TRUE	up.late	3230	4377	4868	2994	4907	4171	5078	5764	6215	-0.413279	-0.759138	1.17242	12.0802	11.9906	12.4908
chr20	51596514	51768390	171877	-	ATP9A	protein_coding	ENSG00000054793	ENSG00000054793.14	3565.83	0.179116	-1.26975	1.49363	0.330457	1.31965e-14	1.64453e-19	FALSE	TRUE	TRUE	up.late	3211	4169	5225	1674	1695	1752	4388	5970	4112	0.500952	-1.29004	0.789088	12.0757	10.8357	12.2752
chr11	73400487	73598189	197703	-	FAM168A	protein_coding	ENSG00000054965	ENSG00000054965.11	1903.49	0.115197	0.389309	-0.267257	0.523927	0.00862368	0.0853369	FALSE	TRUE	FALSE	up.early	1237	1727	2056	2087	2522	2356	1575	2123	1612	-0.824441	1.08239	-0.257953	10.8075	11.2308	10.9333
chr14	87837820	87993665	155846	-	GALC	protein_coding	ENSG00000054983	ENSG00000054983.17	54.7729	-6.77715	-8.61622	0.632586	5.00302e-16	8.01844e-14	0.169832	TRUE	TRUE	FALSE	down.early	206	265	330	0	0	0	1	1	1	1.31476	-0.797839	-0.516919	8.20943	6.28361	6.5397
chr7	150944961	150978321	33361	-	KCNH2	protein_coding	ENSG00000055118	ENSG00000055118.16	42.7468	4.05579	-0.373344	5.02456	5.76152e-16	0.269537	2.7625e-16	TRUE	FALSE	TRUE	up.late	9	6	4	1	3	5	158	133	109	-0.553498	-0.758251	1.31175	6.69953	6.56136	7.95817
chr7	148697914	148801110	103197	+	CUL1	protein_coding	ENSG00000055130	ENSG00000055130.17	3288.04	-0.768449	-0.361109	-0.308304	2.00986e-05	0.041773	0.0898825	TRUE	FALSE	FALSE	down.early	3854	4047	4878	2250	4326	3224	2056	2486	2650	1.05436	-0.0819997	-0.972362	12.1175	11.6686	11.3169
chr5	157266079	157395595	129517	+	CYFIP2	protein_coding	ENSG00000055163	ENSG00000055163.20	1964.9	1.02844	-0.00086757	1.0413	2.90696e-08	0.998785	3.59668e-08	TRUE	FALSE	TRUE	up.late	1111	1227	1717	1318	1978	1526	2545	3506	2609	-0.629734	-0.625307	1.25504	10.6079	10.6103	11.6354
chr6	149566294	149591748	25455	+	GINM1	protein_coding	ENSG00000055211	ENSG00000055211.14	1100.4	0.218141	-0.218005	0.452948	0.236298	0.214261	0.00614717	FALSE	FALSE	TRUE	up.late	934	1083	1274	806	1116	947	1179	1480	1062	0.046587	-0.963809	0.917222	10.2814	10.0368	10.4921
chr2	37099210	37157065	57856	-	EIF2AK2	protein_coding	ENSG00000055332	ENSG00000055332.18	4612.18	0.614328	0.0472521	0.535719	2.87344e-05	0.818179	0.000214497	TRUE	FALSE	TRUE	up.late	3208	4138	4315	3813	4989	3479	4853	6663	6111	-0.700216	-0.529161	1.22938	11.952	12.0087	12.5912
chr17	78787381	78841441	54061	-	USP36	protein_coding	ENSG00000055483	ENSG00000055483.19	2428.47	0.656491	0.400801	0.203414	1.95949e-06	0.00374285	0.17856	TRUE	TRUE	FALSE	up.early	1690	1847	1930	2313	2999	2465	2319	3165	3186	-1.17989	0.223335	0.956551	10.9456	11.3744	11.5984
chr7	152134922	152436003	301082	-	KMT2C	protein_coding	ENSG00000055609	ENSG00000055609.19	5442.24	-0.909803	-0.822799	-0.0629343	9.5683e-08	1.65139e-06	0.786388	TRUE	TRUE	FALSE	down.early	6360	7778	9924	3385	5755	4637	3146	4316	4195	1.24522	-0.535123	-0.710097	12.9837	12.1116	12.0259
chr1	85018082	85048500	30419	-	MCOLN3	protein_coding	ENSG00000055732	ENSG00000055732.13	123.026	5.64139	3.68278	1.81315	1.10669e-31	8.094e-14	7.13019e-08	TRUE	TRUE	TRUE	up.early	10	3	3	53	94	85	218	242	381	-1.11499	-0.0315881	1.14657	6.65	7.64412	8.7252
chr2	56183990	56386172	202183	+	CCDC85A	protein_coding	ENSG00000055813	ENSG00000055813.6	33.9923	-1.09274	0.0374341	-1.21412	0.0134747	0.91978	0.00963016	FALSE	FALSE	TRUE	down.late	45	49	30	40	57	44	8	4	28	0.48035	0.632481	-1.11283	7.31691	7.36304	6.83381
chr2	20248691	20352234	103544	-	PUM2	protein_coding	ENSG00000055917	ENSG00000055917.16	5057.53	0.646675	-0.124318	0.788425	6.64501e-07	0.428639	9.84533e-10	TRUE	FALSE	TRUE	up.late	3440	4266	5089	3000	5775	4030	5909	7355	6974	-0.448971	-0.823869	1.27284	12.1266	11.9817	12.7921
chr10	100969458	100987515	18058	-	MRPL43	protein_coding	ENSG00000055950	ENSG00000055950.16	1848.71	0.620484	0.182639	0.394629	7.29112e-07	0.190192	0.00177481	TRUE	FALSE	TRUE	up.late	1186	1654	1655	1733	1899	1622	2280	2666	2009	-0.96161	-0.250891	1.2125	10.6776	10.8735	11.2768
chr22	44881162	45010005	128844	-	PHF21B	protein_coding	ENSG00000056487	ENSG00000056487.16	36.8997	3.50731	3.20245	0.11749	1.25824e-08	1.60101e-07	0.712971	TRUE	TRUE	FALSE	up.early	2	6	2	82	71	63	43	51	58	-1.26469	0.533379	0.731308	6.61251	7.38951	7.47504
chr9	122844556	122905359	60804	-	RC3H2	protein_coding	ENSG00000056586	ENSG00000056586.16	4115.38	0.433685	0.22566	0.172466	0.00071562	0.0913732	0.227529	TRUE	FALSE	FALSE	up.early	3101	3735	4456	2786	4844	4256	4016	4955	5232	-1.09516	0.0910109	1.00415	11.8136	12.0655	12.2593
chr3	53846568	53865794	19227	+	IL17RB	protein_coding	ENSG00000056736	ENSG00000056736.10	73.4197	0.0415746	-1.1669	1.28959	0.915391	0.00204826	0.00112726	FALSE	TRUE	TRUE	up.late	76	92	92	23	54	34	56	70	137	0.55057	-1.07572	0.525152	7.77772	7.18792	7.7685
chr6	111555381	111606906	51526	-	TRAF3IP2	protein_coding	ENSG00000056972	ENSG00000056972.20	1696.79	0.883268	0.388188	0.388292	6.48974e-07	0.0267304	0.0269881	TRUE	FALSE	FALSE	up.early	990	1227	1457	1330	1880	1625	2197	2579	1936	-1.04241	-0.0153732	1.05778	10.3699	10.7936	11.2363
chr3	98795941	98901695	105755	-	DCBLD2	protein_coding	ENSG00000057019	ENSG00000057019.16	20372.3	1.39814	0.543166	0.632197	5.56982e-09	0.0145291	0.00474959	TRUE	FALSE	TRUE	up.early	9622	11818	13012	13274	25531	17955	22120	26788	42805	-1.01172	-0.0473436	1.05907	13.4761	14.1391	14.8999
chr18	63655197	63661893	6697	-	SERPINB3	protein_coding	ENSG00000057149	ENSG00000057149.16	612.904	4.41673	-0.933083	5.58996	3.48857e-43	0.00289387	4.36781e-62	TRUE	TRUE	TRUE	up.late	61	65	113	20	37	47	1967	2202	1011	-0.519927	-0.784311	1.30424	7.66751	7.21168	10.8126
chr6	105993463	106109939	116477	+	PRDM1	protein_coding	ENSG00000057657	ENSG00000057657.17	229.444	1.21141	-0.212132	1.63244	1.72399e-05	0.407572	5.69887e-08	TRUE	FALSE	TRUE	up.late	141	168	205	86	160	112	343	454	338	-0.410972	-0.801471	1.21244	8.19086	7.97451	9.0903
chr6	106045423	106325791	280369	-	ATG5	protein_coding	ENSG00000057663	ENSG00000057663.16	1514.64	-0.47326	-0.231891	-0.197858	0.000598175	0.104121	0.187224	TRUE	FALSE	FALSE	down.early	1480	1796	2014	1269	1813	1611	1161	1262	1289	1.087	-0.0757798	-1.01122	10.9276	10.6711	10.4647
chr12	94567122	94650557	83436	-	TMCC3	protein_coding	ENSG00000057704	ENSG00000057704.13	221.563	1.09734	0.48217	0.472152	3.66891e-08	0.0131617	0.0117292	TRUE	FALSE	FALSE	up.early	105	119	162	187	262	227	282	355	331	-1.09288	-0.0301804	1.12306	8.0842	8.44518	8.83692
chr2	42494569	42756947	262379	+	MTA3	protein_coding	ENSG00000057935	ENSG00000057935.14	1227.39	0.0511658	-0.621911	0.680848	0.828975	0.000441632	0.000112349	FALSE	TRUE	TRUE	up.late	1160	1383	1639	857	1072	1015	1240	1432	1063	0.511084	-1.19446	0.683373	10.5777	9.95084	10.6411
chr3	179653040	179789401	136362	+	USP13	protein_coding	ENSG00000058056	ENSG00000058056.9	1596.49	0.562215	0.469219	0.0575876	0.000350959	0.00241428	0.790887	TRUE	TRUE	FALSE	up.early	1018	1314	1375	1380	2384	1668	1483	1991	1868	-1.18625	0.450091	0.736156	10.4035	10.8768	10.9595
chr1	183186238	183245127	58890	+	LAMC2	protein_coding	ENSG00000058085	ENSG00000058085.15	51769.8	-0.369592	-0.731377	0.319462	0.0174614	1.0125e-06	0.0371719	FALSE	TRUE	FALSE	down.early	62477	65137	69807	35225	48977	35383	46842	58800	43107	1.08307	-1.0516	-0.0314717	16.0176	15.2393	15.6112
chr7	90466424	91210590	744167	+	CDK14	protein_coding	ENSG00000058091	ENSG00000058091.17	1562.52	-1.31226	-0.898187	-0.336859	4.29766e-17	7.76986e-09	0.0342415	TRUE	TRUE	FALSE	down.early	2330	2371	2893	1049	1774	1520	697	851	967	1.24733	-0.30605	-0.941276	11.3476	10.4691	10.1098
chr15	78959906	79090780	130875	-	RASGRF1	protein_coding	ENSG00000058335	ENSG00000058335.16	32.6576	0.462509	-1.87882	2.8327	0.183461	0.000208386	5.16983e-08	FALSE	TRUE	TRUE	up.late	26	15	28	6	13	13	43	74	42	0.191568	-1.12158	0.930011	7.19477	6.70822	7.46838
chr7	44217150	44334577	117428	-	CAMK2B	protein_coding	ENSG00000058404	ENSG00000058404.20	49.8934	3.67247	4.3004	-0.21144	2.10501e-06	3.0217e-08	0.523482	TRUE	TRUE	FALSE	up.early	1	4	5	119	57	121	76	74	19	-1.14216	0.828699	0.313465	6.63547	7.72153	7.4376
chr1	16740273	16972964	232692	+	CROCC	protein_coding	ENSG00000058453	ENSG00000058453.17	405.105	0.598232	0.929701	-0.260572	0.00109224	3.57399e-07	0.156385	TRUE	TRUE	FALSE	up.early	196	323	294	704	566	436	382	448	355	-1.17784	0.952944	0.224899	8.66266	9.39161	9.14254
chr16	22297375	22335101	37727	+	POLR3E	protein_coding	ENSG00000058600	ENSG00000058600.16	2050.63	-0.508346	-0.223632	-0.22683	0.0013772	0.174194	0.175519	TRUE	FALSE	FALSE	down.early	2200	2756	2717	1749	2467	1722	1458	1836	1681	1.00555	-0.0300167	-0.975529	11.3484	11.0767	10.8286
chr1	203626787	203744081	117295	+	ATP2B4	protein_coding	ENSG00000058668	ENSG00000058668.15	7727.79	-0.719845	-0.264256	-0.397102	9.44132e-08	0.0596775	0.00363657	TRUE	FALSE	TRUE	down.early	7457	10113	11989	7970	8150	8178	4946	6482	5074	1.02625	0.125136	-1.15139	13.2606	12.952	12.5149
chr1	203795623	203854999	59377	+	ZC3H11A	protein_coding	ENSG00000058673	ENSG00000058673.17	3016.05	0.395949	0.0313372	0.341708	0.00504291	0.878728	0.0144624	TRUE	FALSE	FALSE	up.late	2168	2962	2980	2386	3240	3010	3151	4050	3264	-0.660351	-0.512089	1.17244	11.4675	11.5005	11.8758
chr5	97160867	97183247	22381	-	RIOK2	protein_coding	ENSG00000058729	ENSG00000058729.11	600.315	-0.0292483	0.393129	-0.426709	0.901215	0.016828	0.00985168	FALSE	FALSE	TRUE	down.late	522	568	652	587	923	845	442	447	494	-0.527493	1.15306	-0.625564	9.40742	9.7972	9.38467
chr3	186105668	186362234	256567	-	DGKG	protein_coding	ENSG00000058866	ENSG00000058866.15	88.8212	6.16424	0.690434	4.79359	2.73508e-32	0.0686312	9.84223e-22	TRUE	FALSE	TRUE	up.late	7	5	4	2	8	9	164	168	263	-0.735974	-0.568084	1.30406	6.57697	6.74322	8.59714
chr7	139777051	140020325	243275	+	TBXAS1	protein_coding	ENSG00000059377	ENSG00000059377.18	38.8308	-1.30991	0.442719	-2.20555	0.000734335	0.116119	1.04346e-07	TRUE	FALSE	TRUE	down.late	23	29	40	78	79	78	13	13	13	0.127059	1.03747	-1.16453	7.27106	7.55719	6.86514
chr7	140023749	140062951	39203	-	PARP12	protein_coding	ENSG00000059378	ENSG00000059378.13	900.739	-0.607464	-0.634796	0.0330403	0.000285813	0.000128685	0.894408	TRUE	TRUE	FALSE	down.early	1053	1283	1149	741	923	653	653	792	819	1.21805	-0.651775	-0.566273	10.4007	9.78997	9.8179
chr10	95605941	95656711	50771	-	ALDH18A1	protein_coding	ENSG00000059573	ENSG00000059573.9	5328.99	0.80537	0.374151	0.390004	4.57533e-14	0.000628851	0.000363961	TRUE	TRUE	TRUE	up.early	3312	4086	4221	4884	6384	4657	6220	7500	6948	-1.1305	-0.0183729	1.14887	11.9818	12.376	12.7897
chr4	151670504	151761007	90504	-	GATB	protein_coding	ENSG00000059691	ENSG00000059691.12	1007.63	-0.559709	0.132069	-0.705018	2.78958e-05	0.39693	7.30383e-08	TRUE	FALSE	TRUE	down.late	825	1199	1202	1162	1411	1150	643	779	758	0.407067	0.860154	-1.26722	10.2741	10.4125	9.76258
chr2	69897688	69942945	45258	+	MXD1	protein_coding	ENSG00000059728	ENSG00000059728.11	1161.68	1.34078	-0.529316	1.99056	6.45209e-13	0.00387811	6.07947e-26	TRUE	TRUE	TRUE	up.late	608	913	1041	422	773	479	1821	2449	1783	-0.301815	-0.949707	1.25152	9.90445	9.37951	11.163
chr9	111631334	111654351	23018	+	DNAJC25	protein_coding	ENSG00000059769	ENSG00000059769.20	332.875	0.521703	0.718698	-0.163697	0.00389203	5.1652e-05	0.402724	TRUE	TRUE	FALSE	up.early	212	247	234	413	457	382	353	418	293	-1.18772	0.896714	0.291005	8.54945	9.11444	8.95026
chr12	7919230	7936187	16958	-	SLC2A3	protein_coding	ENSG00000059804	ENSG00000059804.16	236.166	-1.06057	6.63744	-8.31821	0.0269316	2.49203e-51	1.25509e-45	FALSE	TRUE	TRUE	down.late	4	2	9	572	983	636	4	1	2	-0.604338	1.32681	-0.722476	6.68333	9.71997	6.49756
chr18	79679803	79754510	74708	+	CTDP1	protein_coding	ENSG00000060069	ENSG00000060069.17	1540.25	-0.566861	0.00270496	-0.541745	0.00172351	0.99352	0.00205958	TRUE	FALSE	TRUE	down.late	1292	2182	1728	2092	1759	1441	1027	1137	1259	0.586075	0.560328	-1.1464	10.8849	10.8764	10.3133
chr12	10699089	10723323	24235	-	YBX3	protein_coding	ENSG00000060138	ENSG00000060138.13	12049.7	0.657741	0.483584	0.102963	0.0013168	0.0147669	0.67238	TRUE	FALSE	FALSE	up.early	6790	10256	9627	13763	13952	10855	14391	15752	12096	-1.05006	0.314163	0.735895	13.0923	13.6517	13.8247
chr12	10618923	10674318	55396	-	STYK1	protein_coding	ENSG00000060140	ENSG00000060140.9	67.6749	0.2858	-0.989974	1.54587	0.351888	0.00277305	2.32566e-05	FALSE	TRUE	TRUE	up.late	58	67	94	35	42	27	60	82	118	0.280603	-1.11887	0.838267	7.62909	7.16595	7.81364
chr12	752579	911452	158874	+	WNK1	protein_coding	ENSG00000060237	ENSG00000060237.18	6854.18	-0.481807	0.0635573	-0.537728	0.00444443	0.772083	0.00102089	TRUE	FALSE	TRUE	down.late	5907	6923	8554	5804	10238	8276	4449	5815	6077	0.449884	0.684284	-1.13417	12.8893	12.9656	12.3733
chr19	3136033	3163749	27717	+	GNA15	protein_coding	ENSG00000060558	ENSG00000060558.4	2203.22	1.88016	1.07043	0.721061	2.67352e-33	9.58557e-12	2.61542e-06	TRUE	TRUE	TRUE	up.early	830	1046	956	1997	2567	1831	3732	4051	2925	-1.19173	0.118643	1.07309	10.1094	11.1192	11.8547
chr1	26787054	26800659	13606	+	PIGV	protein_coding	ENSG00000060642	ENSG00000060642.11	681.333	-0.275705	-0.612382	0.299938	0.120993	0.00022974	0.0792679	FALSE	TRUE	FALSE	down.early	663	858	991	468	601	502	575	857	653	1.02364	-1.04732	0.0236822	9.95455	9.38536	9.67972
chr1	31259568	31296788	37221	-	SNRNP40	protein_coding	ENSG00000060688	ENSG00000060688.13	2317.55	0.165576	0.40781	-0.232909	0.358245	0.00892866	0.162592	FALSE	TRUE	FALSE	up.early	1762	2159	1957	2765	3387	2232	2068	2117	2498	-0.872616	1.00148	-0.128864	11.0446	11.4925	11.2223
chr3	38103129	38137242	34114	-	ACAA1	protein_coding	ENSG00000060971	ENSG00000060971.19	2642.43	-0.724765	-0.710527	-0.00154675	6.82272e-05	9.27097e-05	0.999159	TRUE	TRUE	FALSE	down.early	2622	4474	3894	2456	2173	1740	2271	2366	1855	1.20215	-0.612077	-0.590074	11.9016	11.1331	11.1424
chr12	47782722	47833132	50411	-	HDAC7	protein_coding	ENSG00000061273	ENSG00000061273.18	3641.78	-0.626094	0.0818757	-0.713835	4.98003e-06	0.647696	1.3774e-07	TRUE	FALSE	TRUE	down.late	3186	4631	4427	4585	4754	4019	2171	2862	2447	0.505764	0.759724	-1.26549	12.0335	12.1244	11.3988
chr8	20246165	20303963	57799	-	LZTS1	protein_coding	ENSG00000061337	ENSG00000061337.15	36.4154	5.1503	0.576461	3.76563	4.46845e-13	0.131316	8.68878e-15	TRUE	FALSE	TRUE	up.late	2	3	1	11	8	5	85	155	116	-0.784975	-0.523905	1.30888	6.54273	6.70353	7.83235
chr5	123089241	123194266	105026	+	PRDM6	protein_coding	ENSG00000061455	ENSG00000061455.11	12.0525	1.93207	2.17452	-0.0146924	0.00261244	0.000557035	0.977409	TRUE	TRUE	FALSE	up.early	4	8	5	17	29	33	5	3	5	-1.14412	0.591838	0.55228	6.54088	6.93806	6.92901
chr20	35615829	35621094	5266	+	SPAG4	protein_coding	ENSG00000061656	ENSG00000061656.10	121.522	-3.79884	-1.02324	-2.40961	3.04785e-20	0.00255974	5.59625e-09	TRUE	TRUE	TRUE	down.early	76	285	241	105	86	89	26	30	14	1.0385	0.0810726	-1.11958	8.54551	7.83396	6.94165
chr4	155758992	155807811	48820	+	GUCY1B1	protein_coding	ENSG00000061918	ENSG00000061918.14	133.253	1.72176	-0.696823	2.85702	4.15765e-06	0.0288906	9.10351e-13	TRUE	FALSE	TRUE	up.late	101	59	51	17	47	46	273	391	252	-0.330954	-0.894271	1.22523	7.63099	7.2323	8.73239
chr16	68636189	68722616	86428	+	CDH3	protein_coding	ENSG00000062038	ENSG00000062038.14	15257.7	-0.735465	-1.74736	0.95903	1.87289e-08	1.04042e-40	2.91628e-13	TRUE	TRUE	TRUE	down.early	20094	26763	26685	6930	8407	6682	12950	16452	12645	1.0964	-1.18608	0.0896736	14.5802	12.8332	13.8097
chr11	75759512	75801535	42024	+	DGAT2	protein_coding	ENSG00000062282	ENSG00000062282.15	308.058	1.57612	0.855339	0.596997	3.20567e-18	2.59586e-06	0.000462374	TRUE	TRUE	TRUE	up.early	133	145	198	265	393	247	449	502	442	-1.16467	0.0584748	1.1062	8.17347	8.76793	9.27713
chr17	59707192	59842255	135064	+	VMP1	protein_coding	ENSG00000062716	ENSG00000062716.13	10990.3	0.9871	0.675002	0.267664	3.22605e-15	9.50634e-08	0.045646	TRUE	TRUE	FALSE	up.early	6192	7453	8297	9153	15554	12899	11421	14395	13662	-1.24388	0.284743	0.959136	12.8161	13.5129	13.8203
chr19	47608196	47703277	95082	+	BICRA	protein_coding	ENSG00000063169	ENSG00000063169.11	599.916	-0.495722	0.0663769	-0.556173	0.0021997	0.751905	0.00039785	TRUE	FALSE	TRUE	down.late	479	731	766	602	846	574	390	513	529	0.474188	0.741407	-1.21559	9.64869	9.71797	9.21057
chr19	39391303	39400641	9339	+	MED29	protein_coding	ENSG00000063322	ENSG00000063322.15	1651.62	-0.370815	0.114875	-0.488685	0.00775522	0.481051	0.000251875	TRUE	FALSE	TRUE	down.late	1473	1827	1871	1778	2282	1866	1159	1484	1225	0.333469	0.865339	-1.19881	10.8801	11.0086	10.5101
chr5	321759	438291	116533	+	AHRR	protein_coding	ENSG00000063438	ENSG00000063438.19	22.5043	0.199349	2.18842	-1.62076	0.621792	0.000655311	0.00335897	FALSE	TRUE	TRUE	down.late	2	7	5	103	67	99	9	5	13	-0.716455	1.2112	-0.494746	6.73252	7.38303	6.80734
chrX	153334147	153360110	25964	+	ZNF275	protein_coding	ENSG00000063587	ENSG00000063587.15	697.635	0.429868	0.851097	-0.374256	0.00325184	1.61757e-09	0.00823565	TRUE	TRUE	TRUE	up.early	435	509	537	828	1044	955	577	728	702	-1.12921	1.11584	0.0133688	9.32001	10.0581	9.69564
chr14	77800109	77935014	134906	+	ADCK1	protein_coding	ENSG00000063761	ENSG00000063761.16	261.894	-0.593966	-0.0941427	-0.425452	0.00433038	0.695075	0.0338648	TRUE	FALSE	FALSE	down.late	250	357	351	281	322	241	149	209	210	0.7503	0.360038	-1.11034	8.82008	8.72309	8.35766
chr16	1795620	1827157	31538	-	HAGH	protein_coding	ENSG00000063854	ENSG00000063854.13	1311.18	-0.375693	-0.738426	0.295293	0.0699491	0.000251087	0.140969	FALSE	TRUE	FALSE	down.early	1291	2270	1858	1062	1051	744	1329	1365	973	1.01235	-0.944845	-0.0675092	10.8646	10.0978	10.4415
chr2	201233443	201287711	54269	+	CASP8	protein_coding	ENSG00000064012	ENSG00000064012.22	1684.48	0.53288	0.323499	0.158256	0.000352055	0.0296959	0.34984	TRUE	FALSE	FALSE	up.early	1193	1509	1669	1800	1918	1597	1558	1939	1876	-1.12303	0.200172	0.922855	10.5321	10.8745	11.0615
chr4	41359607	41700044	340438	+	LIMCH1	protein_coding	ENSG00000064042	ENSG00000064042.18	1769.45	-0.858624	-2.3593	1.34386	0.000282941	6.74376e-21	1.1316e-07	TRUE	TRUE	TRUE	down.early	2522	3544	4348	420	802	515	1161	1577	1677	1.05062	-1.16386	0.113236	11.6769	9.48187	10.7477
chr12	26905181	26938326	33146	-	INTS13	protein_coding	ENSG00000064102	ENSG00000064102.15	1879.12	0.799381	0.255892	0.443745	1.01013e-05	0.163141	0.0123976	TRUE	FALSE	FALSE	up.late	1119	1431	1599	1503	2359	1735	2517	2502	2064	-0.938776	-0.155932	1.09471	10.5732	10.8787	11.3667
chr17	49990005	49995224	5220	-	DLX3	protein_coding	ENSG00000064195	ENSG00000064195.7	6.34216	-2.32564	-3.08064	0.209342	0.00611395	0.00356915	0.585368	TRUE	TRUE	FALSE	down.early	20	20	15	0	0	1	1	0	4	1.18675	-0.675363	-0.511383	6.93282	6.37921	6.42796
chr11	124673844	124697518	23675	+	SPA17	protein_coding	ENSG00000064199	ENSG00000064199.7	323.638	-0.724768	0.210409	-1.06433	0.00195484	0.353786	1.30007e-05	TRUE	FALSE	TRUE	down.late	268	359	447	303	615	473	168	208	157	0.297734	0.832539	-1.13027	8.93365	9.14988	8.35627
chr20	44714844	44728509	13666	+	CCN5	protein_coding	ENSG00000064205	ENSG00000064205.10	319.456	-5.45426	-1.74746	-3.19715	9.31596e-19	0.000840813	2.38022e-07	TRUE	TRUE	TRUE	down.early	315	1075	1055	240	130	180	6	27	11	1.13146	-0.0514327	-1.08003	9.76416	8.23111	6.89804
chr3	98732236	98821201	88966	+	ST3GAL6	protein_coding	ENSG00000064225	ENSG00000064225.12	37.8333	-0.322731	-1.63537	1.00658	0.309898	7.5201e-05	0.00683339	FALSE	TRUE	TRUE	down.early	53	50	58	10	20	15	31	49	60	0.957094	-1.1615	0.204408	7.48199	6.93625	7.2881
chr16	84368527	84464187	95661	+	ATP2C2	protein_coding	ENSG00000064270	ENSG00000064270.13	166.534	-0.840164	-3.55615	2.47498	0.00302899	7.46706e-26	3.97029e-13	TRUE	TRUE	TRUE	down.early	242	267	274	33	39	33	130	115	146	1.01827	-1.1807	0.162428	8.82497	7.10395	8.15514
chr17	49495293	49515008	19716	+	NGFR	protein_coding	ENSG00000064300	ENSG00000064300.9	1449.64	7.00685	0.734712	5.94944	2.70809e-83	0.018223	1.04455e-65	TRUE	FALSE	TRUE	up.late	16	38	45	62	81	53	4878	6037	1898	-0.737472	-0.569665	1.30714	7.17018	7.56348	11.9624
chr11	125955796	126063335	107540	-	CDON	protein_coding	ENSG00000064309	ENSG00000064309.14	132.994	1.50734	1.7931	-0.144916	1.73945e-06	2.62324e-08	0.600134	TRUE	TRUE	FALSE	up.early	43	33	56	167	281	224	140	201	118	-1.23349	0.788881	0.444609	7.40538	8.34805	8.18758
chr8	119730774	119832841	102068	-	TAF2	protein_coding	ENSG00000064313	ENSG00000064313.12	1810.33	-0.583757	-0.586973	0.0150643	0.000181291	0.000137936	0.954047	TRUE	TRUE	FALSE	down.early	2041	2385	2867	1178	1929	1743	1259	1527	1539	1.22436	-0.627637	-0.596719	11.3057	10.7001	10.7102
chr7	139561570	139777998	216429	-	HIPK2	protein_coding	ENSG00000064393	ENSG00000064393.16	7445.72	-1.25739	0.512921	-1.90371	9.01827e-11	0.00618705	3.22745e-22	TRUE	TRUE	TRUE	down.late	5719	7743	10147	9545	13229	13408	2254	3353	3133	0.266715	0.9601	-1.22682	12.912	13.5042	11.6364
chr7	128954180	129055173	100994	-	TNPO3	protein_coding	ENSG00000064419	ENSG00000064419.13	4187.23	-0.599981	-0.433555	-0.128917	3.62937e-06	0.000789202	0.409903	TRUE	TRUE	FALSE	down.early	4573	5544	5834	3256	4880	3568	2939	3714	3607	1.23084	-0.371355	-0.859489	12.4172	11.9483	11.8054
chr19	19623655	19628930	5276	-	LPAR2	protein_coding	ENSG00000064547	ENSG00000064547.14	736.092	0.540641	-0.511221	1.14217	0.00094469	0.00167614	5.40093e-12	TRUE	TRUE	TRUE	up.late	605	768	679	450	505	400	1079	1281	938	-0.024755	-1.09928	1.12404	9.7183	9.24671	10.2225
chr5	128083766	128189677	105912	+	SLC12A2	protein_coding	ENSG00000064651	ENSG00000064651.14	2358.49	0.566681	0.0026393	0.546712	1.81239e-05	0.99208	2.72955e-05	TRUE	FALSE	TRUE	up.late	1793	2122	2330	1526	2509	2035	2779	3318	2908	-0.642845	-0.625238	1.26808	11.0754	11.0806	11.6431
chr20	46894624	47188844	294221	+	EYA2	protein_coding	ENSG00000064655	ENSG00000064655.19	80.3894	6.06882	0.249389	5.32357	1.1688e-23	0.451518	1.8158e-24	TRUE	FALSE	TRUE	up.late	6	0	3	8	5	3	162	228	300	-0.718508	-0.586029	1.30454	6.52061	6.65121	8.51485
chr19	1026586	1039068	12483	+	CNN2	protein_coding	ENSG00000064666	ENSG00000064666.15	8914.11	0.48817	0.13778	0.317725	5.6144e-05	0.329716	0.0101379	TRUE	FALSE	FALSE	up.late	6498	8135	8071	8066	9860	7846	10321	12266	9397	-0.929284	-0.261103	1.19039	12.9083	13.0669	13.4115
chr19	1039997	1065572	25576	+	ABCA7	protein_coding	ENSG00000064687	ENSG00000064687.13	987.674	-0.262204	-1.02436	0.673745	0.212242	3.60739e-07	0.000547519	FALSE	TRUE	TRUE	down.early	832	1498	1538	825	617	521	955	1161	933	0.86995	-1.16774	0.297788	10.4903	9.54916	10.2261
chr12	29149103	29340980	191878	+	FAR2	protein_coding	ENSG00000064763	ENSG00000064763.11	81.3765	-0.333493	0.393925	-0.911627	0.278431	0.145541	0.00455727	FALSE	FALSE	TRUE	down.late	92	48	88	63	146	140	47	57	53	-0.161825	0.985099	-0.823275	7.61985	7.94869	7.43021
chr20	53936777	54070594	133818	-	BCAS1	protein_coding	ENSG00000064787	ENSG00000064787.13	7.13136	-0.394342	-3.90004	2.28551	0.322905	0.000789166	0.0111105	FALSE	TRUE	FALSE	down.early	9	11	26	0	0	1	7	5	8	0.936654	-1.18509	0.248435	6.88323	6.342	6.70767
chr1	111200771	111243440	42670	+	CHI3L2	protein_coding	ENSG00000064886	ENSG00000064886.14	138.662	-1.58211	-0.0718242	-1.45299	2.34879e-06	0.814727	2.27779e-05	TRUE	FALSE	TRUE	down.late	152	199	291	169	125	186	56	57	40	0.703556	0.486823	-1.19038	8.33996	8.23964	7.46334
chr19	1107637	1174268	66632	-	SBNO2	protein_coding	ENSG00000064932	ENSG00000064932.16	5825.85	0.410019	0.198899	0.167659	0.00812256	0.219868	0.32548	TRUE	FALSE	FALSE	up.early	3636	5995	5427	6097	6066	4794	6642	8242	6031	-0.967145	0.0481704	0.918975	12.3046	12.5405	12.7429
chr6	34889255	35091406	202152	+	ANKS1A	protein_coding	ENSG00000064999	ENSG00000064999.15	2139.09	0.335643	-0.161466	0.507272	0.0168711	0.290912	0.000144162	FALSE	FALSE	TRUE	up.late	1586	2167	2261	1591	2303	1580	2284	3034	2617	-0.208689	-0.949587	1.15828	11.0907	10.9047	11.4337
chr6	35258909	35295985	37077	+	ZNF76	protein_coding	ENSG00000065029	ENSG00000065029.15	705.261	-0.424283	0.152232	-0.586516	0.00147381	0.303103	5.02581e-06	TRUE	FALSE	TRUE	down.late	615	826	843	837	897	810	470	531	567	0.303347	0.943711	-1.24706	9.79338	9.94747	9.4203
chr16	2025356	2039026	13671	+	NHERF2	protein_coding	ENSG00000065054	ENSG00000065054.14	1670.8	0.308092	-0.6299	1.01895	0.10331	0.000435213	2.75889e-08	FALSE	TRUE	TRUE	up.late	1369	2075	1767	1209	1170	842	2333	2565	1751	0.237414	-1.17	0.93259	10.8781	10.2239	11.2013
chr16	2039815	2047866	8052	-	NTHL1	protein_coding	ENSG00000065057	ENSG00000065057.9	856.61	-0.236769	-0.504932	0.24322	0.253854	0.00716292	0.217434	FALSE	TRUE	FALSE	down.early	779	1259	1083	840	732	520	891	917	722	0.909004	-0.942367	0.0333623	10.2121	9.67779	9.95941
chr13	97953658	98024296	70639	+	IPO5	protein_coding	ENSG00000065150	ENSG00000065150.21	12564.1	0.175582	0.370828	-0.190799	0.27545	0.00901575	0.224657	FALSE	TRUE	FALSE	up.early	9207	11079	11815	12124	19392	13744	10923	13066	12760	-0.939888	0.967983	-0.0280954	13.4154	13.8303	13.6137
chr10	124397303	124418976	21674	-	OAT	protein_coding	ENSG00000065154	ENSG00000065154.12	4997.48	0.578217	-0.153325	0.747767	1.42292e-06	0.267026	2.4963e-10	TRUE	FALSE	TRUE	up.late	3778	4628	4717	3380	4828	3842	6287	7176	6389	-0.388497	-0.880776	1.26927	12.1523	11.9768	12.7433
chr1	117929720	117966543	36824	+	WDR3	protein_coding	ENSG00000065183	ENSG00000065183.16	2648.61	0.338423	0.567371	-0.204216	0.0553387	0.000699053	0.260591	FALSE	TRUE	FALSE	up.early	1825	2124	2160	2695	4075	2961	2305	2923	2848	-1.04979	0.908184	0.141609	11.0974	11.7046	11.4669
chr19	984332	998438	14107	+	WDR18	protein_coding	ENSG00000065268	ENSG00000065268.11	2399.2	0.197815	0.486662	-0.271996	0.223626	0.00074821	0.0730674	FALSE	TRUE	FALSE	up.early	1509	2389	2106	3018	3181	2561	2389	2499	2056	-0.955292	1.08245	-0.127159	11.0571	11.5709	11.2659
chr6	52497408	52577060	79653	-	TRAM2	protein_coding	ENSG00000065308	ENSG00000065308.5	2138.84	-0.049765	1.89527	-1.9612	0.861541	1.10761e-16	8.37362e-18	FALSE	TRUE	TRUE	down.late	969	1084	1228	3502	5138	4455	665	1075	1424	-0.592482	1.2884	-0.695913	10.2899	12.1	10.1904
chr17	9021510	9244000	222491	+	NTN1	protein_coding	ENSG00000065320	ENSG00000065320.9	103.066	4.6004	-0.316257	5.26819	4.26093e-34	0.295154	2.16689e-39	TRUE	FALSE	TRUE	up.late	9	9	12	7	13	4	285	355	267	-0.593497	-0.731136	1.32463	6.84195	6.70493	8.75146
chr12	56076799	56103505	26707	+	ERBB3	protein_coding	ENSG00000065361	ENSG00000065361.16	1564.98	-0.441712	-2.5153	1.98703	0.030235	2.47749e-33	2.63656e-21	FALSE	TRUE	TRUE	down.early	1926	2789	3141	383	499	355	1575	2169	1560	0.879286	-1.27629	0.397	11.3711	9.15736	10.8758
chr16	75627474	75648643	21170	-	KARS1	protein_coding	ENSG00000065427	ENSG00000065427.15	8930.1	-0.400808	-0.289262	-0.0757723	0.0090167	0.0563165	0.703934	TRUE	FALSE	FALSE	down.early	9409	10790	11462	6490	11068	8236	6944	8540	7881	1.0854	-0.376214	-0.709189	13.3924	13.0409	12.9609
chr16	75596981	75623300	26320	-	ADAT1	protein_coding	ENSG00000065457	ENSG00000065457.10	1121.96	-0.74689	-0.667278	-0.0459005	9.31156e-05	0.00044388	0.862398	TRUE	TRUE	FALSE	down.early	1329	1681	1634	819	1211	758	691	926	1068	1.19341	-0.525785	-0.667621	10.746	10.05	9.99259
chr3	123067025	123225227	158203	+	PDIA5	protein_coding	ENSG00000065485	ENSG00000065485.20	1121.71	0.738528	0.21176	0.464005	3.9932e-07	0.176882	0.00137125	TRUE	FALSE	TRUE	up.late	612	1054	995	1053	1141	943	1380	1636	1316	-0.95319	-0.242242	1.19543	9.97085	10.2018	10.6688
chr3	123610049	123884332	274284	-	MYLK	protein_coding	ENSG00000065534	ENSG00000065534.19	361.472	1.24776	4.16685	-2.7304	2.49921e-05	2.30731e-42	3.16963e-21	TRUE	TRUE	TRUE	up.early	59	33	52	730	948	700	98	155	198	-0.898451	1.27264	-0.374186	7.39055	10.0093	8.0229
chr1	212363928	212414901	50974	-	PACC1	protein_coding	ENSG00000065600	ENSG00000065600.13	354.408	0.841941	0.0534442	0.757457	1.32349e-06	0.818465	1.16223e-05	TRUE	FALSE	TRUE	up.late	227	259	301	297	373	241	428	595	479	-0.706265	-0.565203	1.27147	8.68278	8.73049	9.3517
chr10	104031286	104085880	54595	-	COL17A1	protein_coding	ENSG00000065618	ENSG00000065618.21	16274.1	1.46787	0.428274	0.932546	6.31572e-17	0.0124797	1.105e-07	TRUE	FALSE	TRUE	up.late	6999	10342	12459	13295	15061	12357	23402	30825	19423	-0.983513	-0.221981	1.20549	13.1889	13.7056	14.6741
chr10	6427143	6580301	153159	-	PRKCQ	protein_coding	ENSG00000065675	ENSG00000065675.15	55.7535	2.9506	3.1457	-0.10919	1.16004e-12	3.29667e-14	0.710945	TRUE	TRUE	FALSE	up.early	10	10	6	75	114	75	55	90	77	-1.30534	0.748459	0.556884	6.76764	7.72224	7.6332
chr19	2997639	3047635	49997	-	TLE2	protein_coding	ENSG00000065717	ENSG00000065717.15	90.0264	-2.56432	-0.994612	-1.15661	2.51763e-11	0.00218334	0.001439	TRUE	TRUE	TRUE	down.early	150	183	175	78	76	56	31	27	19	1.14381	-0.108095	-1.03571	8.25891	7.59927	7.11049
chr2	238426742	238452250	25509	+	ASB1	protein_coding	ENSG00000065802	ENSG00000065802.12	1885.49	1.10247	0.471484	0.49226	1.10516e-08	0.0119291	0.00820339	TRUE	FALSE	TRUE	up.early	920	1326	1289	2076	2018	1496	2359	2820	2563	-1.04549	-0.0378351	1.08333	10.3813	10.894	11.4644
chr10	14518557	14774897	256341	-	FAM107B	protein_coding	ENSG00000065809	ENSG00000065809.13	1647.66	1.20108	-0.219899	1.49146	2.03952e-15	0.174925	2.35927e-22	TRUE	FALSE	TRUE	up.late	903	1304	1396	813	1314	941	2616	3119	2355	-0.457155	-0.835155	1.29231	10.3748	10.1273	11.5203
chr6	83210402	83431051	220650	-	ME1	protein_coding	ENSG00000065833	ENSG00000065833.9	1956.08	0.991562	0.484551	0.441723	8.80685e-14	0.000315808	0.000965889	TRUE	TRUE	TRUE	up.early	1141	1326	1419	1766	2044	1972	2487	3058	2428	-1.13609	0.0201242	1.11596	10.5078	10.9963	11.4592
chr7	39950121	40099580	149460	+	CDK13	protein_coding	ENSG00000065883	ENSG00000065883.16	3194	-0.816922	-0.509015	-0.273421	7.81807e-15	1.60179e-06	0.0152043	TRUE	TRUE	FALSE	down.early	3418	4416	4906	2845	3490	2984	2072	2500	2319	1.2374	-0.217603	-1.0198	12.1097	11.5919	11.3064
chr2	74186172	74217565	31394	+	MTHFD2	protein_coding	ENSG00000065911	ENSG00000065911.13	7476.34	0.931555	-0.141568	1.10883	2.09158e-14	0.329259	1.95856e-19	TRUE	FALSE	TRUE	up.late	4847	6307	6601	4877	6375	4819	10392	12662	10234	-0.495238	-0.806681	1.30192	12.5482	12.3849	13.4904
chrX	46599251	46759118	159868	-	SLC9A7	protein_coding	ENSG00000065923	ENSG00000065923.10	5990.44	0.0162349	-0.520399	0.535847	0.940541	0.000519932	0.000326356	FALSE	TRUE	TRUE	up.late	5319	7458	8708	4289	4993	3885	5793	8295	5899	0.581113	-1.20627	0.625152	12.7389	12.1735	12.7529
chr12	8032716	8055517	22802	+	FOXJ2	protein_coding	ENSG00000065970	ENSG00000065970.9	1015.42	-0.364498	0.0855211	-0.4454	0.0423209	0.690597	0.0088453	FALSE	FALSE	TRUE	down.late	876	1145	1212	925	1530	1114	642	856	925	0.363829	0.713047	-1.07688	10.2608	10.3506	9.89053
chr1	212285410	212361853	76444	+	PPP2R5A	protein_coding	ENSG00000066027	ENSG00000066027.12	1639.53	-0.0471689	-0.363184	0.314564	0.796181	0.006442	0.0212457	FALSE	TRUE	FALSE	up.late	1389	2020	2048	1198	1727	1296	1681	1986	1524	0.726005	-1.18833	0.462321	10.9395	10.5598	10.8872
chr12	50504985	50748657	243673	+	DIP2B	protein_coding	ENSG00000066084	ENSG00000066084.13	4189.23	0.244831	-0.135591	0.384712	0.040369	0.304336	0.00063673	FALSE	FALSE	TRUE	up.late	3338	4194	4787	3194	4488	3416	4264	5466	4830	-0.186737	-0.987569	1.17431	12.0387	11.8884	12.2943
chr12	50085200	50100707	15508	+	SMARCD1	protein_coding	ENSG00000066117	ENSG00000066117.15	2680.88	0.255463	0.475467	-0.207294	0.089662	0.000628456	0.173818	FALSE	TRUE	FALSE	up.early	1783	2456	2267	3123	3424	2896	2385	2885	2981	-1.04817	1.02293	0.025242	11.1962	11.6992	11.4569
chr1	40691648	40771603	79956	+	NFYC	protein_coding	ENSG00000066136	ENSG00000066136.20	1392.21	-0.39836	-0.175029	-0.182546	0.00898178	0.282921	0.268383	TRUE	FALSE	FALSE	down.early	1302	1660	1669	1158	1840	1495	1066	1224	1188	0.96319	0.00572026	-0.96891	10.775	10.5808	10.383
chr2	232878701	233013256	134556	-	NGEF	protein_coding	ENSG00000066248	ENSG00000066248.15	802.834	-0.727522	0.908551	-1.80452	0.000901381	3.52634e-05	2.88881e-15	TRUE	TRUE	TRUE	down.late	537	839	693	1543	1453	1409	346	425	244	-0.0980239	1.15094	-1.05292	9.67239	10.5588	8.9947
chr1	43363398	43368074	4677	-	ELOVL1	protein_coding	ENSG00000066322	ENSG00000066322.15	4636.77	0.117051	-0.266022	0.393597	0.455197	0.0470911	0.00250309	FALSE	FALSE	TRUE	up.late	3751	5132	5435	3511	4851	3740	5063	6016	4459	0.283344	-1.13919	0.855841	12.272	11.9739	12.392
chr3	101648889	101677132	28244	-	ZBTB11	protein_coding	ENSG00000066422	ENSG00000066422.5	1679.03	0.668225	0.0413424	0.588462	0.000125944	0.861177	0.000572729	TRUE	FALSE	TRUE	up.late	1185	1253	1458	1049	1789	1581	2170	2536	2195	-0.651686	-0.544069	1.19575	10.5559	10.5956	11.2383
chr10	121478332	121598458	120127	-	FGFR2	protein_coding	ENSG00000066468	ENSG00000066468.23	78.451	2.30107	0.152944	1.99225	2.36538e-12	0.590154	6.2375e-10	TRUE	FALSE	TRUE	up.late	42	22	34	36	42	40	121	167	185	-0.740398	-0.551827	1.29222	7.183	7.27939	8.22202
chr1	70144805	70205579	60775	-	LRRC40	protein_coding	ENSG00000066557	ENSG00000066557.6	808.495	-0.515758	0.0452209	-0.54551	0.00758736	0.855342	0.00335332	TRUE	FALSE	TRUE	down.late	695	998	1000	649	1168	1065	544	583	644	0.500237	0.60056	-1.1008	10.0291	10.0602	9.53318
chr14	99737693	99942060	204368	+	EML1	protein_coding	ENSG00000066629	ENSG00000066629.18	384.893	-3.05198	0.920094	-4.04848	1.55832e-48	1.93168e-07	2.30495e-86	TRUE	TRUE	TRUE	down.late	352	327	318	582	802	637	39	51	80	0.268743	0.991566	-1.26031	9.00581	9.7905	7.34589
chr6	125986479	126203817	217339	+	TRMT11	protein_coding	ENSG00000066651	ENSG00000066651.20	791.82	0.622949	-0.147279	0.796638	1.95056e-05	0.382134	4.02139e-08	TRUE	FALSE	TRUE	up.late	610	767	739	520	782	577	1050	1081	962	-0.406314	-0.854192	1.26051	9.70112	9.54734	10.2734
chr9	100427143	100451734	24592	+	MSANTD3	protein_coding	ENSG00000066697	ENSG00000066697.15	996.26	1.06491	1.27074	-0.14819	6.55537e-10	3.60548e-13	0.447357	TRUE	TRUE	FALSE	up.early	531	490	565	1152	1593	1241	973	1131	1291	-1.27597	0.797254	0.478714	9.38477	10.5136	10.3401
chr14	104138723	104180894	42172	+	KIF26A	protein_coding	ENSG00000066735	ENSG00000066735.14	3.87745	-3.39842	-0.11445	-2.2069	0.00342819	0.755537	0.0147383	TRUE	FALSE	FALSE	down.late	7	6	8	6	7	1	0	0	0	0.841827	0.367962	-1.20979	6.71258	6.6135	6.28361
chr14	96279195	96363341	84147	-	ATG2B	protein_coding	ENSG00000066739	ENSG00000066739.12	1531.03	-0.301357	0.216309	-0.546292	0.15135	0.285441	0.00482892	FALSE	FALSE	TRUE	down.late	1252	1524	1881	1426	2224	1967	901	1241	1425	0.0821615	0.864537	-0.946698	10.7103	10.9737	10.3639
chr8	67173511	67343781	170271	-	ARFGEF1	protein_coding	ENSG00000066777	ENSG00000066777.9	4002.22	-0.616452	-0.971042	0.28911	0.000172802	3.40725e-09	0.0854757	TRUE	TRUE	FALSE	down.early	4688	5815	7405	2094	3492	3090	3075	3862	3096	1.18726	-0.942143	-0.24512	12.5036	11.518	11.8406
chr8	134477788	134713049	235262	-	ZFAT	protein_coding	ENSG00000066827	ENSG00000066827.16	515.643	-0.730421	-0.257306	-0.400357	2.14508e-06	0.102057	0.00973952	TRUE	FALSE	TRUE	down.early	498	661	728	440	702	512	328	410	397	1.03831	0.112349	-1.15066	9.6374	9.37817	9.02459
chr8	65644734	65771261	126528	+	MTFR1	protein_coding	ENSG00000066855	ENSG00000066855.16	1973.13	-0.212615	-0.514607	0.27359	0.321732	0.00720121	0.164972	FALSE	TRUE	FALSE	down.early	1798	2659	2553	1570	1876	1384	1976	2265	1609	0.848871	-0.930968	0.0820978	11.2993	10.7169	11.0484
chr18	57544377	57586702	42326	-	FECH	protein_coding	ENSG00000066926	ENSG00000066926.12	1320.69	-1.12615	-0.139959	-0.951991	1.81011e-14	0.410026	1.4008e-10	TRUE	FALSE	TRUE	down.late	1321	1779	1831	1622	1590	1416	651	751	916	0.807091	0.482219	-1.28931	10.8545	10.6932	9.81396
chr15	71822291	72118577	296287	-	MYO9A	protein_coding	ENSG00000066933	ENSG00000066933.16	2350.21	-0.437062	-0.381886	-0.0298402	0.00192132	0.00568332	0.890397	TRUE	TRUE	FALSE	down.early	2264	2880	3409	1646	2825	2320	1932	2211	1883	1.19647	-0.524008	-0.67246	11.5534	11.1485	11.1136
chr10	1039152	1049170	10019	-	IDI1	protein_coding	ENSG00000067064	ENSG00000067064.11	2470.57	-0.276632	0.128376	-0.409214	0.080757	0.461824	0.00582812	FALSE	FALSE	TRUE	down.late	2296	2617	2687	2390	3552	2890	1886	1981	2068	0.210995	0.847614	-1.05861	11.3896	11.5349	11.0996
chr10	3775996	3785281	9286	-	KLF6	protein_coding	ENSG00000067082	ENSG00000067082.15	4861.69	-0.613576	-0.34053	-0.192001	0.000901915	0.0596219	0.332107	TRUE	FALSE	FALSE	down.early	5752	6025	6575	4021	6392	4079	3379	4347	3349	1.03615	-0.184177	-0.85197	12.6242	12.1882	11.9496
chr5	55424854	55534969	110116	-	PLPP1	protein_coding	ENSG00000067113	ENSG00000067113.17	302.858	0.895873	1.01276	-0.0642559	0.00154403	0.000507019	0.839546	TRUE	TRUE	FALSE	up.early	129	166	175	347	403	398	361	420	285	-1.07934	0.628481	0.450858	8.22678	9.01974	8.93727
chr15	73051710	73305205	253496	+	NEO1	protein_coding	ENSG00000067141	ENSG00000067141.17	471.672	2.10616	1.88966	0.131084	2.5709e-15	1.65109e-12	0.614002	TRUE	TRUE	FALSE	up.early	100	144	162	481	668	637	621	768	778	-1.27077	0.524064	0.746708	8.1368	9.50691	9.67687
chr8	70573218	70608416	35199	-	TRAM1	protein_coding	ENSG00000067167	ENSG00000067167.8	5447.56	-0.938184	-0.290634	-0.472969	8.91514e-05	0.195052	0.0348208	TRUE	FALSE	FALSE	down.early	6973	6574	8609	3260	6492	6294	3103	3815	3718	0.912432	0.0429138	-0.955346	12.8621	12.3844	11.836
chrX	72578814	72714319	135506	-	PHKA1	protein_coding	ENSG00000067177	ENSG00000067177.15	1549.25	-0.357763	-0.259366	-0.0726089	0.00655709	0.0495901	0.678356	TRUE	FALSE	FALSE	down.early	1374	1898	2180	1262	1798	1411	1162	1577	1432	1.17741	-0.366375	-0.811032	10.9317	10.6577	10.5787
chr12	6328757	6342114	13358	-	TNFRSF1A	protein_coding	ENSG00000067182	ENSG00000067182.8	4965.96	0.614789	1.14843	-0.455665	8.22014e-05	1.86095e-13	0.00305236	TRUE	TRUE	TRUE	up.early	2277	3554	3624	7276	7030	6601	4603	5595	4194	-1.14749	1.06799	0.0795006	11.6456	12.7948	12.2821
chr17	39173453	39197703	24251	-	CACNB1	protein_coding	ENSG00000067191	ENSG00000067191.16	278.791	-0.416216	0.241554	-0.700878	0.0214192	0.174925	4.8928e-05	FALSE	FALSE	TRUE	down.late	222	255	290	340	357	318	192	258	253	0.123244	1.01894	-1.14218	8.72523	8.94538	8.4142
chr15	73978926	73994622	15697	-	STOML1	protein_coding	ENSG00000067221	ENSG00000067221.14	465.343	-0.468841	0.135506	-0.624696	0.0239786	0.542405	0.00174824	FALSE	FALSE	TRUE	down.late	396	575	503	725	554	509	328	342	290	0.318073	0.757254	-1.07533	9.32138	9.45282	8.90435
chr15	72199029	72231822	32794	-	PKM	protein_coding	ENSG00000067225	ENSG00000067225.18	119469	-0.732112	-0.216706	-0.475624	6.83204e-11	0.0748881	2.60069e-05	TRUE	FALSE	TRUE	down.late	114739	170807	159317	129029	136921	112529	80426	94186	84663	0.978942	0.254608	-1.23355	17.1681	16.9202	16.4109
chr5	55256055	55307694	51640	-	DHX29	protein_coding	ENSG00000067248	ENSG00000067248.10	1727.01	-0.64812	0.120702	-0.8002	0.000381254	0.562413	1.06893e-05	TRUE	FALSE	TRUE	down.late	1602	1931	2196	1596	2590	2388	1011	1073	1297	0.428517	0.757056	-1.18557	11.0018	11.1363	10.3408
chr1	93866284	93879918	13635	-	DNTTIP2	protein_coding	ENSG00000067334	ENSG00000067334.14	2236.99	0.504309	0.218406	0.220996	0.0037583	0.221918	0.224175	TRUE	FALSE	FALSE	up.early	1641	1978	2098	1805	2694	2412	2537	2171	2684	-0.93626	0.0110382	0.925222	10.9377	11.2017	11.4566
chr15	43403061	43510728	107668	-	TP53BP1	protein_coding	ENSG00000067369	ENSG00000067369.14	2553.31	-0.100004	0.205413	-0.31075	0.448187	0.073224	0.00464083	FALSE	FALSE	TRUE	down.late	1975	2819	3132	2541	3389	2649	2034	2451	2217	-0.264088	1.2128	-0.94871	11.3563	11.5756	11.2547
chr12	78863993	79452008	588016	+	SYT1	protein_coding	ENSG00000067715	ENSG00000067715.14	66.1398	-1.66068	-0.278758	-1.08928	3.52305e-06	0.295911	0.00154624	TRUE	FALSE	TRUE	down.late	100	86	86	48	112	81	17	29	40	0.944656	0.244413	-1.18907	7.83469	7.60464	7.13371
chr16	4796968	4802880	5913	-	ROGDI	protein_coding	ENSG00000067836	ENSG00000067836.13	405.881	-0.457591	-0.659971	0.174365	0.00636818	5.90093e-05	0.346324	TRUE	TRUE	FALSE	down.early	389	617	598	341	323	310	341	428	330	1.1971	-0.904734	-0.292362	9.3961	8.84588	9.00619
chrX	153802166	153830565	28400	-	PDZD4	protein_coding	ENSG00000067840	ENSG00000067840.12	11.0898	4.78296	0.551317	2.70595	3.65452e-05	0.183291	0.000295844	TRUE	FALSE	TRUE	up.late	0	0	2	1	8	2	33	24	25	-0.888869	-0.373122	1.26199	6.3555	6.54851	7.16044
chr18	20946906	21111813	164908	-	ROCK1	protein_coding	ENSG00000067900	ENSG00000067900.8	3397.35	-0.899203	-0.508699	-0.265585	1.6586e-05	0.0118501	0.201115	TRUE	FALSE	FALSE	down.early	3429	4819	5559	2312	3764	3177	2271	2455	2587	1.0902	-0.214405	-0.875796	12.2543	11.6164	11.2931
chr16	67028984	67101058	72075	+	CBFB	protein_coding	ENSG00000067955	ENSG00000067955.15	2562.29	-0.967311	-0.609879	-0.292587	3.60791e-11	3.18416e-05	0.0559246	TRUE	TRUE	FALSE	down.early	3117	3703	4144	1708	2982	2224	1395	1881	2190	1.20951	-0.237737	-0.971772	11.8753	11.2425	10.9215
chrX	24465270	24550466	85197	+	PDK3	protein_coding	ENSG00000067992	ENSG00000067992.16	844.834	2.5391	0.572398	1.82711	2.05568e-31	0.00567153	9.62462e-18	TRUE	TRUE	TRUE	up.late	142	198	275	413	727	668	1816	2434	2030	-0.893487	-0.380759	1.27425	8.76777	9.27009	10.8915
chr2	239048168	239401654	353487	-	HDAC4	protein_coding	ENSG00000068024	ENSG00000068024.17	898.17	0.141924	0.614757	-0.43459	0.51736	0.000901654	0.0176298	FALSE	TRUE	FALSE	down.late	648	805	852	1280	1467	1215	523	698	777	-0.759679	1.11405	-0.354373	9.75155	10.3648	9.88421
chr17	43006740	43014456	7717	+	IFI35	protein_coding	ENSG00000068079	ENSG00000068079.8	539.072	1.97068	-0.245149	2.33505	8.88803e-17	0.270133	1.2099e-22	TRUE	FALSE	TRUE	up.late	220	337	302	275	205	158	1189	1274	861	-0.499342	-0.790344	1.28969	8.70529	8.44534	10.3034
chr17	60041008	60078922	37915	-	HEATR6	protein_coding	ENSG00000068097	ENSG00000068097.15	960.486	0.54625	0.431018	0.0771526	0.00027903	0.00367402	0.697281	TRUE	TRUE	FALSE	up.early	621	727	867	869	1165	1002	1014	1365	1073	-1.20682	0.448594	0.758228	9.78856	10.2122	10.2914
chr17	42667914	42676994	9081	-	PLEKHH3	protein_coding	ENSG00000068137	ENSG00000068137.15	1380.67	0.0384067	-1.07375	1.13129	0.867007	1.66393e-10	2.27169e-11	FALSE	TRUE	TRUE	up.late	1088	1919	1647	951	846	695	1715	2054	1446	0.601129	-1.28484	0.683712	10.8209	9.82166	10.8646
chr15	99565417	99716466	151050	+	MEF2A	protein_coding	ENSG00000068305	ENSG00000068305.17	1301.61	-0.34788	0.174572	-0.543759	0.0895945	0.401892	0.00461178	FALSE	FALSE	TRUE	down.late	1088	1187	1620	1104	1736	1858	907	1212	1018	0.167778	0.802402	-0.97018	10.5259	10.729	10.1618
chrX	49028726	49043410	14685	-	TFE3	protein_coding	ENSG00000068323	ENSG00000068323.17	2098.4	0.122416	0.53579	-0.396706	0.45044	5.93827e-05	0.00323306	FALSE	TRUE	TRUE	up.early	1430	1840	1883	2657	3074	2370	1737	2331	1734	-0.838896	1.21926	-0.380366	10.8916	11.4384	11.0135
chrX	109624244	109733403	109160	-	ACSL4	protein_coding	ENSG00000068366	ENSG00000068366.20	4177.98	-0.380944	0.214867	-0.62179	0.0188996	0.194117	5.78829e-05	FALSE	FALSE	TRUE	down.late	3164	4420	5607	4090	5514	5507	2974	3537	3054	0.138375	0.957726	-1.0961	12.0939	12.3604	11.6925
chr2	46916157	47076137	159981	+	TTC7A	protein_coding	ENSG00000068724	ENSG00000068724.17	4760.19	-0.756013	-0.728403	-0.0129482	2.39058e-05	4.74965e-05	0.967061	TRUE	TRUE	FALSE	down.early	5315	8234	7440	4222	3853	3395	3412	4109	3299	1.21153	-0.608742	-0.602788	12.7367	11.9318	11.9345
chr2	45388680	45612165	223486	-	SRBD1	protein_coding	ENSG00000068784	ENSG00000068784.13	947.361	0.586309	-0.0439506	0.621704	0.000331281	0.84513	0.000101956	TRUE	FALSE	TRUE	up.late	648	891	870	577	1046	796	1203	1308	1237	-0.512971	-0.708925	1.2219	9.90191	9.83864	10.4621
chr2	53864069	53970993	106925	-	PSME4	protein_coding	ENSG00000068878	ENSG00000068878.15	7667.57	0.495876	0.0199638	0.455693	0.00012982	0.921052	0.000363416	TRUE	FALSE	TRUE	up.late	5397	6628	7978	5477	8201	7020	8643	10740	9432	-0.660359	-0.586342	1.2467	12.7304	12.7506	13.2496
chr19	38878555	38899862	21308	-	SIRT2	protein_coding	ENSG00000068903	ENSG00000068903.20	1533.75	-0.461843	-0.0467607	-0.3872	0.00109117	0.812672	0.00566562	TRUE	FALSE	TRUE	down.late	1272	1956	1924	1690	1797	1542	1179	1445	1085	0.716054	0.493877	-1.20993	10.8723	10.8197	10.4163
chr2	53787044	53818819	31776	+	ERLEC1	protein_coding	ENSG00000068912	ENSG00000068912.14	1399.43	0.676605	-0.135199	0.855754	0.000258526	0.51587	4.24981e-06	TRUE	FALSE	TRUE	up.late	1058	1072	1357	820	1194	1153	1920	2382	1658	-0.400957	-0.791175	1.19213	10.3683	10.2006	11.0527
chr5	135027734	135034813	7080	-	PITX1	protein_coding	ENSG00000069011	ENSG00000069011.16	3503.22	0.312466	-0.378747	0.745814	0.0893255	0.0281017	1.78728e-05	FALSE	FALSE	TRUE	up.late	2444	4402	3752	2888	2545	2136	4954	4799	3874	0.0828993	-1.06971	0.986809	11.8233	11.3777	12.1728
chr5	66596361	67169595	573235	+	MAST4	protein_coding	ENSG00000069020	ENSG00000069020.18	2620.52	0.907648	-0.472791	1.46422	2.2123e-10	0.0010696	5.98833e-24	TRUE	TRUE	TRUE	up.late	1753	2187	2352	1289	2140	1491	3590	4615	3989	-0.214633	-1.01338	1.22801	11.1792	10.6765	12.0873
chr16	46656132	46689518	33387	-	VPS35	protein_coding	ENSG00000069329	ENSG00000069329.18	7296.87	-0.556439	-0.852351	0.267049	1.71428e-06	1.18084e-13	0.02948	TRUE	TRUE	FALSE	down.early	8309	9728	10514	4701	7154	5567	6140	7227	6107	1.23671	-0.990573	-0.246138	13.2952	12.4324	12.7207
chr16	46955362	46973674	18313	-	DNAJA2	protein_coding	ENSG00000069345	ENSG00000069345.12	3428.16	-0.351877	-0.385237	0.0452899	0.016604	0.00637092	0.828569	FALSE	TRUE	FALSE	down.early	3581	4071	4542	2515	3765	3120	3042	3459	2837	1.15028	-0.697654	-0.452627	12.0559	11.6288	11.6854
chr1	5990927	6101193	110267	+	KCNAB2	protein_coding	ENSG00000069424	ENSG00000069424.15	537.7	2.58912	1.37207	1.00853	1.03553e-19	1.21725e-06	0.000166727	TRUE	TRUE	TRUE	up.early	93	154	149	668	297	560	1149	1453	763	-1.0972	-0.00538578	1.10258	8.20448	9.17279	10.1554
chrX	43766610	43882450	115841	-	MAOB	protein_coding	ENSG00000069535	ENSG00000069535.14	30.2297	0.0636476	2.62136	-2.4564	0.883798	4.23825e-06	1.16947e-05	FALSE	TRUE	TRUE	down.late	5	9	15	68	43	99	7	19	6	-0.630814	1.21628	-0.585468	6.77432	7.58188	6.79414
chr15	60488284	61229302	741019	-	RORA	protein_coding	ENSG00000069667	ENSG00000069667.16	108.171	2.89815	2.72424	0.0482773	6.92138e-07	2.87741e-06	0.899939	TRUE	TRUE	FALSE	up.early	15	10	19	91	187	181	142	186	132	-1.11015	0.435684	0.674467	6.99769	8.02371	8.1822
chr1	91680343	91906335	225993	-	TGFBR3	protein_coding	ENSG00000069702	ENSG00000069702.11	278.599	0.090184	4.04861	-3.91009	0.794435	7.30225e-36	1.55764e-33	FALSE	TRUE	TRUE	down.late	22	48	73	739	660	861	36	34	64	-0.68105	1.31662	-0.635571	7.31763	9.7887	7.37389
chr16	14672548	14694308	21761	-	PLA2G10	protein_coding	ENSG00000069764	ENSG00000069764.10	3.87035	-1.19475	-4.08703	0.600169	0.049455	0.000918815	0.191782	FALSE	TRUE	FALSE	down.early	12	9	9	0	0	0	2	1	1	1.21238	-1.01505	-0.197322	6.79791	6.28361	6.47242
chr1	6412418	6424670	12253	-	HES2	protein_coding	ENSG00000069812	ENSG00000069812.11	1388.88	2.80242	0.467674	2.1527	2.97212e-29	0.0372981	5.03629e-18	TRUE	FALSE	TRUE	up.late	376	423	487	653	775	503	3236	3891	2245	-0.844978	-0.426095	1.27107	9.15967	9.64493	11.611
chr3	141876124	141926549	50426	+	ATP1B3	protein_coding	ENSG00000069849	ENSG00000069849.11	4968.12	0.486689	0.0323036	0.413434	0.00873037	0.897401	0.0211962	TRUE	FALSE	FALSE	up.late	3924	4190	4763	3472	5572	4260	5837	6191	6354	-0.607945	-0.463239	1.07118	12.0889	12.1367	12.6438
chr15	55318960	55355648	36689	+	PIGB	protein_coding	ENSG00000069943	ENSG00000069943.10	362.445	-0.464593	-0.0948638	-0.320523	0.00760194	0.647872	0.063596	TRUE	FALSE	FALSE	down.late	353	421	496	322	436	395	257	303	296	0.803131	0.33339	-1.13652	9.12872	9.03689	8.74952
chr15	51952106	52067375	115270	+	MAPK6	protein_coding	ENSG00000069956	ENSG00000069956.12	2886.19	0.621222	0.3382	0.212815	0.000154622	0.0381697	0.225153	TRUE	FALSE	FALSE	up.early	1886	2023	2696	1998	3755	3402	3176	3498	3847	-1.06846	0.127014	0.941446	11.1997	11.5793	11.8378
chr15	52115100	52191392	76293	-	GNB5	protein_coding	ENSG00000069966	ENSG00000069966.19	841.53	-0.227345	0.382871	-0.636373	0.135242	0.00537256	3.04845e-06	FALSE	TRUE	TRUE	down.late	705	825	843	1126	1347	991	533	647	685	-0.198484	1.19084	-0.99236	9.8762	10.2522	9.66135
chr12	12116025	12267044	151020	-	LRP6	protein_coding	ENSG00000070018	ENSG00000070018.9	2100.1	0.673366	0.354236	0.246776	2.38075e-05	0.0258848	0.140734	TRUE	FALSE	FALSE	up.early	1367	1644	2104	1647	2568	2109	2196	2793	2435	-1.08651	0.089518	0.996994	10.7496	11.1348	11.432
chr3	149964904	150050788	85885	-	PFN2	protein_coding	ENSG00000070087	ENSG00000070087.14	6196.14	0.976332	0.196109	0.729654	9.59132e-13	0.192934	9.86298e-08	TRUE	FALSE	TRUE	up.late	3704	4572	5018	4362	6158	5465	7631	10053	8952	-0.87048	-0.392943	1.26342	12.1591	12.3811	13.1512
chr9	109375466	109498313	122848	-	PTPN3	protein_coding	ENSG00000070159	ENSG00000070159.14	3190.65	0.880079	0.181214	0.653298	9.11547e-12	0.211938	4.03706e-07	TRUE	FALSE	TRUE	up.late	2028	2534	2884	2183	3420	2633	3755	5082	4286	-0.880412	-0.385282	1.26569	11.2957	11.4975	12.1702
chr14	64746283	64879907	133625	-	SPTB	protein_coding	ENSG00000070182	ENSG00000070182.21	21.9457	0.379418	2.32241	-1.47352	0.298199	5.37817e-06	0.00112842	FALSE	TRUE	TRUE	down.late	6	8	10	57	50	36	10	21	7	-0.841553	1.26033	-0.418774	6.73273	7.35457	6.85781
chr4	99816827	99870190	53364	+	DAPP1	protein_coding	ENSG00000070190	ENSG00000070190.13	775.568	0.289504	-1.19571	1.54651	0.0958952	1.44779e-12	5.74429e-20	FALSE	TRUE	TRUE	up.late	819	843	911	298	484	342	1044	1102	1122	0.392917	-1.27518	0.882261	9.98543	8.98833	10.2779
chr9	105244622	105439171	194550	+	SLC44A1	protein_coding	ENSG00000070214	ENSG00000070214.16	4356.28	0.471182	0.108684	0.322956	0.00121382	0.536566	0.0274774	TRUE	FALSE	FALSE	up.late	2965	3716	4266	3385	4916	4296	4745	5997	5176	-0.808298	-0.331735	1.14003	11.915	12.0355	12.4075
chr22	19179473	19291719	112247	-	CLTCL1	protein_coding	ENSG00000070371	ENSG00000070371.16	217.852	-0.0206178	1.31828	-1.35792	0.938645	9.83247e-12	2.38068e-12	FALSE	TRUE	TRUE	down.late	108	140	153	378	421	343	125	172	145	-0.637627	1.31171	-0.674082	8.11035	9.00541	8.09361
chr19	676392	683392	7001	+	FSTL3	protein_coding	ENSG00000070404	ENSG00000070404.10	4253.74	-2.57729	-0.15609	-2.34817	1.07857e-35	0.465944	6.94952e-30	TRUE	FALSE	TRUE	down.late	5427	7933	5632	6411	6518	3962	1059	1084	862	0.745651	0.558446	-1.3041	12.6422	12.4195	10.2042
chr22	19036282	19122454	86173	-	DGCR2	protein_coding	ENSG00000070413	ENSG00000070413.20	4400.46	-0.594442	-0.28596	-0.259433	4.60078e-06	0.0314571	0.0588134	TRUE	FALSE	FALSE	down.early	4192	6009	5980	4410	5002	3950	3008	3941	3385	1.10764	-0.0398705	-1.06777	12.4406	12.1179	11.8289
chr3	126437601	126475891	38291	-	ZXDC	protein_coding	ENSG00000070476	ENSG00000070476.15	1740.12	0.737564	0.110064	0.595083	2.10868e-09	0.475864	1.17847e-06	TRUE	FALSE	TRUE	up.late	1056	1490	1518	1391	1841	1401	2042	2634	2429	-0.815217	-0.471317	1.28653	10.5747	10.6907	11.2835
chr8	42338454	42371808	33355	+	POLB	protein_coding	ENSG00000070501	ENSG00000070501.12	656.958	0.5541	-0.311868	0.943698	0.00126553	0.0692657	4.75699e-08	TRUE	FALSE	TRUE	up.late	496	551	709	364	585	449	948	1084	785	-0.172163	-0.992135	1.1643	9.54094	9.22747	10.0519
chr17	76624761	76643786	19026	-	ST6GALNAC1	protein_coding	ENSG00000070526	ENSG00000070526.15	16.7713	2.67809	-0.161836	3.5015	0.000289623	0.645244	1.26999e-05	TRUE	FALSE	TRUE	up.late	2	4	5	3	3	3	41	53	47	-0.507701	-0.717705	1.22541	6.64724	6.56872	7.29522
chr9	35736866	35749228	12363	-	GBA2	protein_coding	ENSG00000070610	ENSG00000070610.14	2697.62	0.260304	0.374776	-0.115573	0.0650697	0.00457636	0.475845	FALSE	TRUE	FALSE	up.early	1617	2562	2430	3100	3508	2454	2849	3340	2717	-1.12152	0.882301	0.239221	11.2379	11.6439	11.5136
chr5	150485818	150558211	72394	+	NDST1	protein_coding	ENSG00000070614	ENSG00000070614.15	5876.81	0.569953	0.796748	-0.203767	9.75609e-07	4.29542e-12	0.110708	TRUE	TRUE	FALSE	up.early	3414	3801	4348	7578	8579	7469	5157	6975	6532	-1.25861	0.935953	0.322653	12.0561	12.8626	12.6372
chr7	97851677	97872542	20866	-	ASNS	protein_coding	ENSG00000070669	ENSG00000070669.17	1430.98	-0.0487758	-0.57929	0.518899	0.791368	1.58544e-05	0.000102383	FALSE	TRUE	TRUE	up.late	1386	1593	1812	939	1102	1148	1532	1821	1579	0.72323	-1.2655	0.54227	10.8111	10.2427	10.7594
chr16	57882340	57971128	88789	-	CNGB1	protein_coding	ENSG00000070729	ENSG00000070729.14	14.0217	-2.97006	-3.8937	0.19861	0.000523421	0.000103344	0.589552	TRUE	TRUE	FALSE	down.early	7	18	30	4	0	1	4	4	4	1.05402	-0.672792	-0.381232	7.17324	6.43894	6.56292
chr17	76565377	76586956	21580	-	ST6GALNAC2	protein_coding	ENSG00000070731	ENSG00000070731.11	480.836	0.534284	-1.10958	1.89767	0.0489603	0.000163125	7.83346e-10	FALSE	TRUE	TRUE	up.late	452	496	604	147	180	208	884	1123	365	0.200396	-1.10334	0.902939	9.27584	8.36753	9.7653
chr8	100685816	100722809	36994	-	PABPC1	protein_coding	ENSG00000070756	ENSG00000070756.17	61230.9	-0.279786	-0.424512	0.141106	0.0428302	0.00108306	0.359801	FALSE	TRUE	FALSE	down.early	63560	72959	81640	46591	63788	50977	53079	66326	53961	1.12229	-0.919173	-0.203122	16.1508	15.6745	15.8415
chr1	45343883	45491163	147281	-	TESK2	protein_coding	ENSG00000070759	ENSG00000070759.17	146.671	0.906322	-0.533472	1.72562	0.000477503	0.0321155	1.18322e-09	TRUE	FALSE	TRUE	up.late	87	102	135	77	96	65	300	301	158	-0.188382	-0.959551	1.14793	7.96749	7.61381	8.58035
chr16	58113592	58129381	15790	-	CFAP20	protein_coding	ENSG00000070761	ENSG00000070761.8	781.357	-0.127703	-0.368523	0.236172	0.406068	0.00456828	0.0893471	FALSE	TRUE	FALSE	down.early	818	900	928	526	908	616	687	864	846	0.962294	-1.17346	0.211167	10.0127	9.65977	9.88857
chr14	88465778	88555007	89230	-	PTPN21	protein_coding	ENSG00000070778	ENSG00000070778.13	692.2	-0.566391	0.0329287	-0.585021	0.000740149	0.887316	0.000356245	TRUE	FALSE	TRUE	down.late	683	791	864	686	988	730	434	498	580	0.533486	0.673069	-1.20656	9.84414	9.88449	9.34113
chr1	44850522	44986722	136201	-	EIF2B3	protein_coding	ENSG00000070785	ENSG00000070785.17	1436.39	0.328202	0.480138	-0.144132	0.0476107	0.00213647	0.431543	FALSE	TRUE	FALSE	up.early	988	1339	1206	1571	2147	1334	1300	1502	1598	-1.08131	0.853829	0.227479	10.3399	10.8296	10.6711
chr5	150357629	150400308	42680	+	TCOF1	protein_coding	ENSG00000070814	ENSG00000070814.22	9281.88	0.464538	0.306312	0.104854	0.00881559	0.0771705	0.622544	TRUE	FALSE	FALSE	up.early	6719	8228	7166	8647	13884	7759	8883	10780	12227	-1.00747	0.255428	0.75204	12.8839	13.2526	13.3975
chr7	24796540	24981634	185095	-	OSBPL3	protein_coding	ENSG00000070882	ENSG00000070882.13	3500.84	-0.547962	-0.971683	0.356455	0.000657707	1.24e-09	0.0264425	TRUE	TRUE	FALSE	down.early	4004	4647	5344	1998	3354	2523	2683	3518	3234	1.14769	-1.0288	-0.118895	12.294	11.3048	11.7183
chr12	89588049	89709300	121252	-	ATP2B1	protein_coding	ENSG00000070961	ENSG00000070961.16	3103.76	-0.904044	0.371954	-1.37811	2.23038e-08	0.020616	5.56375e-17	TRUE	FALSE	TRUE	down.late	2473	3155	3806	3707	5218	5080	1419	1563	1970	0.264556	0.962669	-1.22722	11.7229	12.1449	10.821
chr2	105744912	105894274	149363	+	NCK2	protein_coding	ENSG00000071051	ENSG00000071051.14	1087.12	-0.676963	-0.40358	-0.215072	2.97311e-06	0.00513921	0.17281	TRUE	TRUE	FALSE	down.early	1182	1506	1500	1126	1144	885	715	921	848	1.18277	-0.223423	-0.959344	10.5971	10.1797	9.96125
chr2	101696850	101894689	197840	+	MAP4K4	protein_coding	ENSG00000071054	ENSG00000071054.16	11302.3	-0.142747	0.298518	-0.45515	0.354889	0.0264263	0.000523623	FALSE	FALSE	TRUE	down.late	8640	10779	13370	11217	17669	13176	8314	10841	9118	-0.250993	1.14803	-0.897037	13.4046	13.7439	13.2479
chr2	98619106	98731132	112027	-	MGAT4A	protein_coding	ENSG00000071073	ENSG00000071073.13	314.244	-0.804236	-2.40469	1.42736	0.00108458	1.28e-18	2.44648e-07	TRUE	TRUE	TRUE	down.early	546	607	696	68	134	81	247	316	254	1.07218	-1.14751	0.0753267	9.45126	7.83002	8.72317
chr4	147732063	148072776	340714	+	ARHGAP10	protein_coding	ENSG00000071205	ENSG00000071205.12	1133.71	-0.596451	-0.0519596	-0.51818	4.62747e-06	0.777945	5.85406e-05	TRUE	FALSE	TRUE	down.late	1137	1334	1437	1082	1555	1191	773	905	847	0.745084	0.534094	-1.27918	10.5082	10.4506	9.95594
chr6	166409364	166906451	497088	-	RPS6KA2	protein_coding	ENSG00000071242	ENSG00000071242.12	3318.39	0.0575777	1.75881	-1.68839	0.813668	1.98662e-20	6.50264e-19	FALSE	TRUE	TRUE	down.late	1317	2067	2117	6947	6506	6763	1845	2272	1213	-0.676243	1.299	-0.622757	10.9283	12.6404	10.9746
chr14	76761468	76783015	21548	+	VASH1	protein_coding	ENSG00000071246	ENSG00000071246.11	80.4164	2.4091	3.56814	-0.80982	2.11092e-08	8.62658e-17	0.0101307	TRUE	TRUE	FALSE	up.early	15	11	10	162	176	140	55	78	71	-1.16922	1.05544	0.113777	6.86252	8.17292	7.61825
chr7	73683025	73705161	22137	+	BUD23	protein_coding	ENSG00000071462	ENSG00000071462.12	2254.16	-0.631023	-0.893751	0.227097	1.57762e-06	8.76721e-12	0.111833	TRUE	TRUE	FALSE	down.early	2475	3542	3226	1740	1988	1392	1894	1979	2051	1.24867	-0.933286	-0.315387	11.6844	10.8071	11.0555
chr14	81471547	81533853	62307	-	SEL1L	protein_coding	ENSG00000071537	ENSG00000071537.14	2647.77	-0.448447	0.00813472	-0.435577	0.00433128	0.975047	0.00439025	TRUE	FALSE	TRUE	down.late	2345	2793	3762	2123	3681	3333	1616	2290	2311	0.559959	0.602364	-1.16232	11.5825	11.5941	11.1137
chrX	154428633	154436516	7884	+	ATP6AP1	protein_coding	ENSG00000071553	ENSG00000071553.18	2514.39	-0.832136	-0.398883	-0.37949	1.39086e-11	0.00137224	0.00270412	TRUE	TRUE	TRUE	down.early	2480	3526	3884	2451	2642	2357	1586	2103	1751	1.13751	-0.0220263	-1.11548	11.753	11.3332	10.9375
chr2	12716889	12742734	25846	+	TRIB2	protein_coding	ENSG00000071575	ENSG00000071575.11	1454.54	2.05999	1.67165	0.223057	2.18114e-12	1.21125e-08	0.378811	TRUE	TRUE	FALSE	up.early	482	487	470	1799	1696	1955	1964	2372	1471	-1.20947	0.42493	0.784536	9.30907	10.8032	11.132
chr3	149030127	149086554	56428	-	HLTF	protein_coding	ENSG00000071794	ENSG00000071794.16	2321.82	3.41111	1.98036	1.38755	8.05576e-95	2.1669e-32	2.0965e-17	TRUE	TRUE	TRUE	up.early	405	404	453	1379	2108	1980	4948	5489	4282	-1.19322	0.0948377	1.09838	9.19156	10.9122	12.2528
chr2	171522247	171558129	35883	+	CYBRD1	protein_coding	ENSG00000071967	ENSG00000071967.12	1068.32	-1.19113	-0.0705262	-1.10933	1.02775e-14	0.727437	1.22457e-12	TRUE	FALSE	TRUE	down.late	1212	1389	1643	1061	1472	1476	483	640	482	0.72565	0.573708	-1.29936	10.554	10.4744	9.49275
chr18	66501083	66604138	103056	-	CDH19	protein_coding	ENSG00000071991	ENSG00000071991.9	523.691	8.19794	-0.350279	8.97284	1.1175e-110	0.279232	2.39659e-74	TRUE	FALSE	TRUE	up.late	6	8	6	0	8	2	1246	1327	1114	-0.625405	-0.705311	1.33072	6.66224	6.49558	10.7421
chr6	170575295	170584692	9398	-	PDCD2	protein_coding	ENSG00000071994	ENSG00000071994.11	2689.83	0.49319	0.34311	0.117169	6.30678e-05	0.00547332	0.436048	TRUE	TRUE	FALSE	up.early	1842	2241	2404	2819	3309	2574	2866	3187	3020	-1.2168	0.32163	0.895169	11.173	11.5321	11.666
chr12	84859491	84913615	54125	-	SLC6A15	protein_coding	ENSG00000072041	ENSG00000072041.17	2513.92	0.889827	1.21294	-0.276446	9.86218e-13	3.51059e-22	0.0356755	TRUE	TRUE	FALSE	up.early	1215	1356	1725	2772	3600	3431	2454	3180	2996	-1.27626	0.920566	0.355693	10.6282	11.787	11.4891
chr19	14091688	14118084	26397	-	PRKACA	protein_coding	ENSG00000072062	ENSG00000072062.15	1942.59	-0.504021	0.0598764	-0.559971	7.29116e-06	0.70483	3.76385e-07	TRUE	FALSE	TRUE	down.late	1664	2233	2441	1806	2729	2391	1298	1665	1465	0.528952	0.774044	-1.303	11.1523	11.2173	10.6669
chr19	14147743	14206187	58445	-	ADGRL1	protein_coding	ENSG00000072071	ENSG00000072071.16	1104.27	1.53686	-0.0187926	1.57809	1.69986e-12	0.948521	7.74259e-13	TRUE	FALSE	TRUE	up.late	388	720	735	812	608	613	1767	2205	2305	-0.634172	-0.64248	1.27665	9.63638	9.63018	11.0616
chr2	130356045	130375405	19361	+	PTPN18	protein_coding	ENSG00000072135	ENSG00000072135.13	1688.58	-0.338977	-0.43286	0.0957711	0.0203587	0.00190399	0.594311	FALSE	TRUE	FALSE	down.early	1599	2366	1997	1414	1880	1431	1344	1651	1553	1.15787	-0.814537	-0.343329	11.0897	10.6474	10.753
chr2	219434843	219493629	58787	+	SPEG	protein_coding	ENSG00000072195	ENSG00000072195.15	1138.79	-0.74598	-0.130048	-0.539534	7.78605e-05	0.540504	0.00340678	TRUE	FALSE	TRUE	down.late	900	1464	1363	1466	1196	1135	862	1080	691	0.800453	0.353791	-1.15424	10.5962	10.4261	9.85194
chr4	53459301	53701405	242105	-	LNX1	protein_coding	ENSG00000072201	ENSG00000072201.14	88.7088	5.3692	-0.156979	5.78273	2.69279e-30	0.634686	1.20448e-31	TRUE	FALSE	TRUE	up.late	8	3	11	6	5	5	194	299	148	-0.625264	-0.687558	1.31282	6.69855	6.63741	8.60076
chr17	19648136	19685760	37625	+	ALDH3A2	protein_coding	ENSG00000072210	ENSG00000072210.19	9809.71	1.74104	1.60423	0.0960798	1.83975e-18	8.92147e-16	0.68486	TRUE	TRUE	FALSE	up.early	2978	4315	4308	13137	11821	11352	13002	16017	11259	-1.28481	0.552042	0.732764	11.9741	13.5583	13.7141
chr3	196027183	196082096	54914	-	TFRC	protein_coding	ENSG00000072274	ENSG00000072274.13	11691.2	-0.64606	-0.233885	-0.299574	0.00296779	0.27447	0.15734	TRUE	FALSE	FALSE	down.early	13117	16031	17278	10438	15893	10792	5490	7036	11464	0.865599	0.100485	-0.966084	13.8589	13.5222	13.0528
chr14	67240713	67336061	95349	+	PALS1	protein_coding	ENSG00000072415	ENSG00000072415.10	1966.32	-0.825763	-0.629219	-0.150603	4.74743e-08	3.2402e-05	0.393816	TRUE	TRUE	FALSE	down.early	2412	2592	3024	1258	2327	1810	1293	1648	1442	1.23983	-0.403276	-0.836556	11.4894	10.8408	10.6697
chr10	60869438	61001440	132003	-	RHOBTB1	protein_coding	ENSG00000072422	ENSG00000072422.17	230.785	-1.5522	-0.363493	-1.01192	2.10024e-10	0.0911524	3.2629e-05	TRUE	FALSE	TRUE	down.early	283	324	435	184	314	211	109	134	93	0.971943	0.203153	-1.1751	8.91624	8.55506	7.90756
chr11	63838928	63911019	72092	+	MARK2	protein_coding	ENSG00000072518	ENSG00000072518.21	3172.63	-0.366261	-0.694045	0.301391	0.0032218	6.70546e-09	0.0162112	TRUE	TRUE	FALSE	down.early	3207	4271	4494	2430	2991	2369	2539	3286	3002	1.14864	-1.08909	-0.059548	12.026	11.3325	11.6515
chr12	132822187	132956304	134118	-	CHFR	protein_coding	ENSG00000072609	ENSG00000072609.18	712.33	-1.51412	-0.995077	-0.394195	2.8739e-15	1.5106e-07	0.0339574	TRUE	TRUE	FALSE	down.early	921	1428	1186	688	532	531	337	437	380	1.23597	-0.303556	-0.932414	10.3725	9.45432	9.07928
chr12	72087266	72670758	583493	+	TRHDE	protein_coding	ENSG00000072657	ENSG00000072657.9	40.5996	-2.90476	-2.87497	0.0348852	0.00284481	0.0030592	0.937767	TRUE	TRUE	FALSE	down.early	82	78	86	3	5	2	6	7	4	1.16879	-0.582469	-0.58632	7.81494	6.66569	6.66316
chr5	132190147	132295315	105169	-	P4HA2	protein_coding	ENSG00000072682	ENSG00000072682.19	3094.44	-0.295549	0.172196	-0.47859	0.0422772	0.260282	0.000460623	FALSE	FALSE	TRUE	down.late	2597	3457	3773	3645	4300	3368	2116	2639	2296	0.162237	0.94988	-1.11212	11.6865	11.8777	11.377
chr16	68084751	68229259	144509	+	NFATC3	protein_coding	ENSG00000072736	ENSG00000072736.19	1746.93	-0.879086	-0.0398231	-0.823677	3.33217e-09	0.851039	3.59651e-08	TRUE	FALSE	TRUE	down.late	1836	2312	2696	1524	2402	1915	936	1154	1179	0.697003	0.583523	-1.28053	11.138	11.0893	10.2886
chr5	172042079	172188224	146146	-	STK10	protein_coding	ENSG00000072786	ENSG00000072786.13	4713.12	0.609648	0.243099	0.330677	1.4155e-08	0.0328929	0.00282	TRUE	FALSE	TRUE	up.early	3173	4023	4265	4635	5322	4513	4929	6242	5284	-1.07192	-0.109492	1.18141	11.9348	12.1963	12.5472
chr4	5711201	5814305	103105	+	EVC	protein_coding	ENSG00000072840	ENSG00000072840.13	1014.67	0.937868	1.83087	-0.717532	1.005e-05	7.10703e-17	0.000535308	TRUE	TRUE	TRUE	up.early	390	521	585	1614	1761	1441	711	928	942	-1.13061	1.0659	0.0647127	9.22041	10.7854	10.072
chr11	10573091	10693988	120898	-	IRAG1	protein_coding	ENSG00000072952	ENSG00000072952.19	6.47928	-1.03642	-2.32992	0.312283	0.0483053	0.0046041	0.404786	FALSE	TRUE	FALSE	down.early	12	17	16	0	4	0	2	5	3	1.1565	-0.963023	-0.193475	6.9117	6.38439	6.57584
chr19	16197854	16245906	48053	+	AP1M1	protein_coding	ENSG00000072958	ENSG00000072958.9	1446.82	-0.197696	0.677028	-0.902917	0.167772	9.50634e-08	1.07746e-12	FALSE	TRUE	TRUE	down.late	1024	1274	1337	1718	2535	2041	989	1147	1088	-0.38939	1.27595	-0.886559	10.4409	11.0923	10.2465
chr19	44643798	44666162	22365	+	PVR	protein_coding	ENSG00000073008	ENSG00000073008.15	6848.49	0.578208	0.195359	0.337977	6.98866e-06	0.163229	0.00995694	TRUE	FALSE	TRUE	up.late	4539	6243	5532	7246	8317	5836	7125	8303	8680	-0.978458	-0.187687	1.16615	12.4763	12.6973	13.0755
chr12	124776856	124882668	105813	-	SCARB1	protein_coding	ENSG00000073060	ENSG00000073060.16	6063.17	0.443332	0.907436	-0.385574	0.0151307	4.45415e-07	0.0286714	FALSE	TRUE	FALSE	up.early	3084	4695	4766	7326	9779	8066	4602	6136	6514	-1.04551	1.0523	-0.00679111	12.0682	13.0139	12.5364
chr22	50170731	50180295	9565	+	PANX2	protein_coding	ENSG00000073150	ENSG00000073150.14	109.241	3.05236	1.92968	0.857329	6.80601e-19	2.96667e-08	0.00241591	TRUE	TRUE	TRUE	up.early	21	24	27	100	83	105	223	259	134	-1.14974	0.0942063	1.05554	7.06842	7.82131	8.40316
chr3	189631389	189897276	265888	+	TP63	protein_coding	ENSG00000073282	ENSG00000073282.14	1260.16	3.65852	2.45619	1.03894	3.17312e-40	7.31783e-19	7.8487e-05	TRUE	TRUE	TRUE	up.early	185	144	215	715	1367	1280	2097	2917	2632	-1.21241	0.191143	1.02127	8.34648	10.2421	11.3632
chr4	112285509	112442621	157113	+	ALPK1	protein_coding	ENSG00000073331	ENSG00000073331.18	650.4	-0.418701	-0.84711	0.376916	0.00521829	6.24288e-09	0.0112713	TRUE	TRUE	FALSE	down.early	716	930	1057	452	612	528	483	641	481	1.13611	-1.0981	-0.0380071	9.98069	9.24709	9.59517
chr17	75525080	75575209	50130	+	LLGL2	protein_coding	ENSG00000073350	ENSG00000073350.14	4296.04	-0.585113	-2.16183	1.51943	0.000289114	1.0137e-40	1.18029e-20	TRUE	TRUE	TRUE	down.early	5369	8198	6938	1644	2004	1247	4442	5055	3469	0.965809	-1.25688	0.291075	12.7865	10.7031	12.1541
chrX	10156975	10237660	80686	+	CLCN4	protein_coding	ENSG00000073464	ENSG00000073464.13	287.225	1.18794	0.205584	0.773092	7.01286e-05	0.435505	0.00599349	TRUE	FALSE	TRUE	up.late	134	187	234	208	288	242	280	382	501	-0.793335	-0.318882	1.11222	8.25765	8.4979	9.22255
chr17	35128730	35142304	13575	-	NLE1	protein_coding	ENSG00000073536	ENSG00000073536.18	1876.72	0.920613	0.22647	0.605276	1.08196e-07	0.208857	0.000387941	TRUE	FALSE	TRUE	up.late	1111	1437	1233	1907	1978	1509	2598	2828	2253	-0.90198	-0.284725	1.18671	10.5291	10.8007	11.4483
chr17	39904595	39919854	15260	-	GSDMB	protein_coding	ENSG00000073605	ENSG00000073605.18	123.189	2.67977	0.888984	1.49493	9.9934e-16	0.0035191	2.57085e-06	TRUE	TRUE	TRUE	up.late	34	39	42	91	84	69	252	301	162	-0.953963	-0.237779	1.19174	7.26121	7.70042	8.57709
chr17	44758988	44781846	22859	+	ADAM11	protein_coding	ENSG00000073670	ENSG00000073670.14	21.7513	3.87775	0.259794	2.90792	2.03155e-07	0.444531	7.30573e-06	TRUE	FALSE	TRUE	up.late	2	3	4	6	6	5	59	71	60	-0.721212	-0.524777	1.24599	6.60452	6.68777	7.43819
chr3	135965728	136147894	182167	+	PPP2R3A	protein_coding	ENSG00000073711	ENSG00000073711.11	2016.65	-0.83795	-0.692817	-0.108608	7.43522e-08	9.12157e-06	0.575417	TRUE	TRUE	FALSE	down.early	2370	2788	3515	1184	2166	1937	1261	1633	1573	1.24861	-0.484723	-0.763884	11.5422	10.8297	10.715
chr14	52857268	52952435	95168	-	FERMT2	protein_coding	ENSG00000073712	ENSG00000073712.15	1322.72	-2.76238	0.0254262	-2.79284	1.58439e-79	0.90466	4.59111e-81	TRUE	FALSE	TRUE	down.late	1543	1782	2221	1339	2036	1901	273	309	280	0.653865	0.674721	-1.32859	10.952	10.976	8.6716
chr2	169064789	169096167	31379	+	DHRS9	protein_coding	ENSG00000073737	ENSG00000073737.17	628.45	3.32977	1.29447	1.81565	6.07617e-25	3.75401e-05	1.06103e-08	TRUE	TRUE	TRUE	up.late	82	120	196	396	287	398	1458	1816	922	-1.00427	-0.186995	1.19126	8.02794	8.96553	10.5467
chr1	186671791	186680423	8633	-	PTGS2	protein_coding	ENSG00000073756	ENSG00000073756.12	182.429	2.62473	0.164245	2.28607	5.389e-14	0.562095	1.89821e-11	TRUE	FALSE	TRUE	up.late	61	52	44	65	99	106	375	531	283	-0.721123	-0.553536	1.27466	7.52074	7.6523	9.08745
chr3	185643130	185825042	181913	-	IGF2BP2	protein_coding	ENSG00000073792	ENSG00000073792.16	4639.48	1.08741	0.398627	0.642863	5.93074e-24	0.000317909	2.65833e-09	TRUE	TRUE	TRUE	up.late	2568	3339	3515	3428	5199	4070	6129	7922	5890	-1.05067	-0.17111	1.22178	11.661	12.0763	12.7341
chr3	185282941	185489094	206154	+	MAP3K13	protein_coding	ENSG00000073803	ENSG00000073803.14	574.402	0.410633	-0.201345	0.658146	0.0683125	0.366876	0.00252603	FALSE	FALSE	TRUE	up.late	492	636	832	250	486	397	654	784	722	-0.151848	-0.85959	1.01144	9.40135	9.14574	9.82149
chr3	186930325	187078553	148229	+	ST6GAL1	protein_coding	ENSG00000073849	ENSG00000073849.16	1044.89	0.400549	-0.100012	0.500628	0.0278438	0.639422	0.00393132	FALSE	FALSE	TRUE	up.late	764	1077	1230	647	1189	788	1078	1439	1271	-0.366433	-0.733253	1.09969	10.0932	9.98804	10.5133
chr13	31846713	32299125	452413	+	FRY	protein_coding	ENSG00000073910	ENSG00000073910.22	168.041	-3.0155	-0.878269	-1.92021	2.64605e-24	0.000915118	1.92097e-10	TRUE	TRUE	TRUE	down.early	240	280	236	114	106	156	36	71	61	1.07203	0.0935979	-1.16563	8.83139	8.1432	7.25751
chr17	46590669	46757464	166796	+	NSF	protein_coding	ENSG00000073969	ENSG00000073969.18	1666.15	-0.682295	-0.501782	-0.133048	6.18265e-06	0.000804531	0.458749	TRUE	TRUE	FALSE	down.early	1831	2133	2696	1226	2029	1480	1132	1389	1261	1.21356	-0.392105	-0.821455	11.192	10.6658	10.5251
chr2	120735623	120992653	257031	+	GLI2	protein_coding	ENSG00000074047	ENSG00000074047.22	25.4292	2.85101	6.45965	-2.96766	0.00402147	4.81813e-08	2.37767e-07	TRUE	TRUE	TRUE	up.early	1	0	0	55	121	67	7	7	6	-0.95974	1.23346	-0.273717	6.34908	7.57122	6.73136
chr2	121337776	121649476	311701	-	CLASP1	protein_coding	ENSG00000074054	ENSG00000074054.20	4350.48	-0.579875	0.389591	-1.04515	0.000186223	0.0109057	1.59184e-11	TRUE	FALSE	TRUE	down.late	3340	4460	5168	5500	6848	6408	2151	3004	2950	0.123895	1.03597	-1.15986	12.1276	12.5565	11.5241
chr19	15159038	15200995	41958	-	NOTCH3	protein_coding	ENSG00000074181	ENSG00000074181.9	3382.25	3.10867	1.57872	1.42065	5.20673e-37	1.35638e-10	7.35545e-09	TRUE	TRUE	TRUE	up.early	558	877	864	3066	2115	2269	6901	9023	5044	-1.12587	0.00227476	1.12359	9.8572	11.3101	12.7543
chr4	6320578	6563600	243023	-	PPP2R2C	protein_coding	ENSG00000074211	ENSG00000074211.14	1028.72	0.495685	-0.190088	0.717111	0.00223444	0.27134	6.09913e-06	TRUE	FALSE	TRUE	up.late	752	973	1075	641	1053	781	1143	1427	1441	-0.270005	-0.912514	1.18252	10.079	9.86425	10.5644
chr19	49340595	49362457	21863	-	TEAD2	protein_coding	ENSG00000074219	ENSG00000074219.14	905.754	-1.65233	-0.293353	-1.28252	2.47948e-21	0.0844161	3.51764e-13	TRUE	FALSE	TRUE	down.late	1042	1359	1375	1052	1122	980	373	415	411	0.886414	0.384237	-1.27065	10.4994	10.1731	9.09754
chr15	63321378	63381846	60469	-	CA12	protein_coding	ENSG00000074410	ENSG00000074410.14	823.625	2.62281	4.04785	-1.30394	3.45827e-20	3.09241e-46	1.95325e-06	TRUE	TRUE	TRUE	up.early	51	109	184	1196	1871	1846	508	743	669	-1.20271	1.05742	0.145295	7.8139	10.8563	9.62849
chr3	127689062	128052190	363129	-	MGLL	protein_coding	ENSG00000074416	ENSG00000074416.14	2361.82	-1.43447	-0.807542	-0.525482	9.72607e-19	5.78615e-07	0.00101298	TRUE	TRUE	TRUE	down.early	3537	3706	3501	1988	2370	1837	1193	1533	1355	1.18521	-0.140461	-1.04475	11.9013	11.0916	10.5392
chr12	95657807	95791189	133383	-	NTN4	protein_coding	ENSG00000074527	ENSG00000074527.13	3077.8	-1.33893	-1.01927	-0.267546	1.395e-22	1.16907e-13	0.0665225	TRUE	TRUE	FALSE	down.early	3894	5070	5715	2546	2413	2441	1805	2085	1741	1.2823	-0.400393	-0.881904	12.3113	11.3004	11.0112
chr2	218658764	218663443	4680	+	BCS1L	protein_coding	ENSG00000074582	ENSG00000074582.15	1416.76	0.543005	0.509977	0.00985751	0.000682108	0.00115878	0.974043	TRUE	TRUE	FALSE	up.early	884	1207	1123	1587	1911	1177	1594	1674	1655	-1.19012	0.554129	0.635996	10.241	10.7519	10.7759
chr12	106063340	106140033	76694	-	NUAK1	protein_coding	ENSG00000074590	ENSG00000074590.13	291.697	2.80167	2.29013	0.351868	8.3247e-27	3.01939e-18	0.11046	TRUE	TRUE	FALSE	up.early	64	61	84	384	321	302	403	543	373	-1.26753	0.389844	0.877685	7.56347	8.88081	9.26856
chr15	65530418	65578349	47932	+	HACD3	protein_coding	ENSG00000074696	ENSG00000074696.13	3005.73	0.574539	0.543967	0.00348693	0.00244159	0.00329638	0.995178	TRUE	TRUE	FALSE	up.early	2010	2114	2326	2492	4629	3446	2707	3641	3930	-1.11046	0.534382	0.576077	11.1821	11.7801	11.7953
chr17	4004445	4143030	138586	-	ZZEF1	protein_coding	ENSG00000074755	ENSG00000074755.15	3546.16	-0.450273	-8.31632e-05	-0.430248	0.00192493	1	0.00246256	TRUE	FALSE	TRUE	down.late	2968	4282	4629	3859	4490	3830	2237	2904	3045	0.598077	0.601335	-1.19941	11.9911	11.9919	11.5165
chr1	8861000	8879190	18191	-	ENO1	protein_coding	ENSG00000074800	ENSG00000074800.16	104999	0.00816902	0.414663	-0.406704	0.958499	2.90188e-05	4.46572e-05	FALSE	TRUE	TRUE	down.late	77999	103567	98191	117499	151108	122617	87385	102910	90433	-0.673234	1.3046	-0.631363	16.5156	16.9583	16.5249
chr7	88205115	88226993	21879	-	SRI	protein_coding	ENSG00000075142	ENSG00000075142.14	3094.63	-0.577205	-0.712378	0.114586	0.000667169	2.26947e-05	0.574153	TRUE	TRUE	FALSE	down.early	4039	4244	4457	1984	3022	2408	2608	2837	2324	1.18659	-0.777624	-0.408969	12.0697	11.3243	11.4642
chr7	83955777	84492724	536948	-	SEMA3A	protein_coding	ENSG00000075213	ENSG00000075213.11	1486.95	1.17561	-0.393205	1.82692	1.44312e-05	0.102292	1.60965e-10	TRUE	FALSE	TRUE	up.late	908	1139	1376	355	1026	667	2290	2661	3056	-0.250789	-0.922959	1.17375	10.2443	9.6675	11.4666
chr7	80742538	80922359	179822	-	SEMA3C	protein_coding	ENSG00000075223	ENSG00000075223.14	6159.88	-1.01135	-1.21767	0.147452	6.50203e-09	6.23371e-12	0.458966	TRUE	TRUE	FALSE	down.early	9121	8843	11807	2744	4561	4934	4675	5255	4043	1.26125	-0.79022	-0.471031	13.2719	12.0249	12.2189
chr22	46267961	46294008	26048	+	TTC38	protein_coding	ENSG00000075234	ENSG00000075234.17	831.083	-0.410493	0.349807	-0.823228	0.0201996	0.0380725	1.53593e-06	FALSE	FALSE	TRUE	down.late	714	991	867	1148	1219	937	491	571	600	0.0178524	1.05428	-1.07213	9.90449	10.2696	9.52049
chr22	46576012	46679790	103779	+	GRAMD4	protein_coding	ENSG00000075240	ENSG00000075240.17	1096.96	0.0131577	-0.722767	0.733527	0.945593	1.94477e-08	9.91683e-09	FALSE	TRUE	TRUE	up.late	863	1475	1590	783	846	759	1146	1403	1064	0.627941	-1.30391	0.67597	10.4653	9.80553	10.4817
chr22	46360834	46537620	176787	-	CELSR1	protein_coding	ENSG00000075275	ENSG00000075275.18	5992.41	-0.580811	-0.744482	0.13455	0.000956436	2.006e-05	0.508532	TRUE	TRUE	FALSE	down.early	6191	9670	9689	5300	5477	4663	3863	5332	4361	1.1735	-0.797232	-0.376265	13.0117	12.2079	12.3796
chr10	100463009	100483744	20736	+	WNT8B	protein_coding	ENSG00000075290	ENSG00000075290.8	6.07573	3.4715	0.14566	2.6064	0.00137685	0.690029	0.00290417	TRUE	FALSE	TRUE	up.late	0	0	2	1	2	1	14	19	16	-0.835802	-0.437993	1.27379	6.3569	6.46658	6.93852
chr7	87833568	87876360	42793	-	SLC25A40	protein_coding	ENSG00000075303	ENSG00000075303.13	713.296	-0.740121	-0.840323	0.0704628	0.00204402	0.000523801	0.808538	TRUE	TRUE	FALSE	down.early	874	1177	1343	335	728	576	445	509	576	1.11531	-0.693477	-0.421835	10.213	9.35047	9.48
chr16	89707134	89720898	13765	-	VPS9D1	protein_coding	ENSG00000075399	ENSG00000075399.14	237.336	-1.19243	-0.830942	-0.17268	0.000107243	0.00438919	0.534963	TRUE	TRUE	FALSE	down.early	259	411	398	194	155	203	153	221	87	1.13511	-0.369968	-0.765139	9.03997	8.29391	8.09802
chr10	38094334	38150293	55960	+	ZNF37A	protein_coding	ENSG00000075407	ENSG00000075407.18	747.498	0.877811	0.685592	0.117374	6.15795e-05	0.00147807	0.634736	TRUE	TRUE	FALSE	up.early	470	461	655	619	1204	1149	615	718	822	-1.13908	0.380039	0.759038	9.25695	9.91788	10.0828
chr14	103385377	103503831	118455	+	MARK3	protein_coding	ENSG00000075413	ENSG00000075413.19	3210.89	0.465341	0.149868	0.272135	0.00133905	0.358537	0.0679344	TRUE	FALSE	FALSE	up.late	2174	2863	3162	2726	3832	2845	3621	4338	3492	-0.899055	-0.199004	1.09806	11.4829	11.6507	11.9615
chr3	172039578	172401669	362092	+	FNDC3B	protein_coding	ENSG00000075420	ENSG00000075420.13	5933.63	1.20112	-0.217036	1.45664	4.03013e-28	0.0707594	3.92577e-40	TRUE	FALSE	TRUE	up.late	3636	4112	5039	2715	4436	3856	9042	11668	9479	-0.477872	-0.833485	1.31136	12.1069	11.8694	13.3018
chr17	66964707	67033398	68692	+	CACNG4	protein_coding	ENSG00000075461	ENSG00000075461.6	63.2446	-3.87689	-6.44039	2.2314	4.0703e-23	6.45511e-20	0.00101081	TRUE	TRUE	TRUE	down.early	171	171	177	1	2	2	14	9	11	1.30471	-0.858557	-0.446153	8.28416	6.48973	6.83182
chr4	48497357	48780322	282966	-	FRYL	protein_coding	ENSG00000075539	ENSG00000075539.15	3512.43	-0.468539	-0.314886	-0.102998	0.00614727	0.0601452	0.619387	TRUE	FALSE	FALSE	down.early	3541	3993	5030	2227	4737	3278	2512	3445	3243	1.05857	-0.324971	-0.733594	12.1143	11.7244	11.6093
chr7	5592816	5606655	13840	+	FSCN1	protein_coding	ENSG00000075618	ENSG00000075618.18	26831.9	0.771675	0.398452	0.301979	2.33724e-07	0.00770201	0.0506338	TRUE	TRUE	FALSE	up.early	14529	23658	20386	28788	30780	22627	34142	38829	29328	-1.11696	0.0907418	1.02622	14.2516	14.7105	15.066
chr7	5526409	5563902	37494	-	ACTB	protein_coding	ENSG00000075624	ENSG00000075624.17	266717	-0.681828	-0.456666	-0.167135	1.17966e-05	0.00310136	0.342323	TRUE	TRUE	FALSE	down.early	298766	399644	350382	231332	299839	213668	189005	223993	201466	1.16679	-0.307312	-0.859479	18.4039	17.8744	17.6761
chr18	36187497	36272157	84661	+	MOCOS	protein_coding	ENSG00000075643	ENSG00000075643.6	3934.08	-1.29367	-0.575932	-0.657153	7.817e-26	3.3393e-06	1.04238e-07	TRUE	TRUE	TRUE	down.early	4276	6415	6374	3613	4323	3564	1979	2434	2572	1.11771	0.0455983	-1.16331	12.5253	11.93	11.2588
chr3	171600404	171810950	210547	-	PLD1	protein_coding	ENSG00000075651	ENSG00000075651.16	1374.58	2.78238	0.0626107	2.66699	8.28128e-24	0.828712	4.55451e-22	TRUE	FALSE	TRUE	up.late	458	418	509	457	667	642	2471	3274	1668	-0.682081	-0.60566	1.28774	9.19098	9.28636	11.6494
chr13	24680408	24712472	32065	+	ATP12A	protein_coding	ENSG00000075673	ENSG00000075673.12	23.796	2.00869	-0.155511	2.56751	0.000231876	0.644851	1.76831e-05	TRUE	FALSE	TRUE	up.late	11	12	6	7	4	10	55	80	32	-0.494749	-0.720207	1.21496	6.79802	6.71482	7.42897
chr3	197042560	197299330	256771	-	DLG1	protein_coding	ENSG00000075711	ENSG00000075711.21	3098.55	0.66442	-0.0112751	0.65926	8.47934e-05	0.966347	7.57057e-05	TRUE	FALSE	TRUE	up.late	2081	2368	2937	1838	3251	2872	3976	4556	4216	-0.563056	-0.648685	1.21174	11.399	11.3654	12.0944
chr3	128693669	128825942	132274	+	RAB7A	protein_coding	ENSG00000075785	ENSG00000075785.14	5238.65	0.482886	0.00159269	0.463035	0.000364082	0.995631	0.000501038	TRUE	FALSE	TRUE	up.late	4013	4542	5308	3382	6163	4841	5552	7015	6697	-0.614438	-0.618321	1.23276	12.2059	12.2048	12.7101
chr7	107580246	107629170	48925	+	BCAP29	protein_coding	ENSG00000075790	ENSG00000075790.12	1450.69	-0.58967	-0.530512	-0.0294635	0.000454264	0.00134282	0.908263	TRUE	TRUE	FALSE	down.early	1685	1862	2098	874	1403	1374	1220	1324	1237	1.18423	-0.560621	-0.623611	10.996	10.4318	10.4115
chr10	100486646	100519864	33219	-	SEC31B	protein_coding	ENSG00000075826	ENSG00000075826.17	208.274	-0.382234	0.305413	-0.82959	0.186346	0.237738	0.00472345	FALSE	FALSE	TRUE	down.late	87	209	247	304	282	328	106	152	174	-0.073703	0.880293	-0.80659	8.3575	8.72405	8.07591
chr1	169921326	170085208	163883	-	KIFAP3	protein_coding	ENSG00000075945	ENSG00000075945.13	1600.09	-1.01162	-0.0362128	-0.973244	4.97067e-22	0.821762	3.03828e-20	TRUE	FALSE	TRUE	down.late	1567	2163	2186	1709	2208	1807	859	1057	952	0.706601	0.623256	-1.32986	11.0392	11.001	10.1057
chr17	28394642	28407197	12556	-	SLC46A1	protein_coding	ENSG00000076351	ENSG00000076351.13	694.912	2.77751	2.61168	0.124798	1.09199e-51	1.1993e-45	0.535029	TRUE	TRUE	FALSE	up.early	132	139	128	948	1079	890	995	1226	955	-1.32055	0.586087	0.734466	8.13403	10.0467	10.1955
chr1	208022242	208244384	222143	-	PLXNA2	protein_coding	ENSG00000076356	ENSG00000076356.7	4591.67	1.46137	1.21216	0.213059	5.2032e-32	2.27483e-22	0.119006	TRUE	TRUE	FALSE	up.early	1831	2293	2309	5875	6798	5893	4881	6675	5355	-1.30484	0.468272	0.836571	11.2232	12.4016	12.6464
chr12	109999186	110039763	40578	+	ANKRD13A	protein_coding	ENSG00000076513	ENSG00000076513.17	1801.87	-1.54557	-0.54833	-0.93873	5.78841e-33	1.98178e-05	6.3461e-13	TRUE	TRUE	TRUE	down.early	2437	2760	3269	1587	2031	1839	772	917	918	1.05457	0.162685	-1.21725	11.4795	10.9192	10.0522
chr8	80034745	80231232	196488	-	TPD52	protein_coding	ENSG00000076554	ENSG00000076554.15	2976.79	-1.02493	-1.53668	0.409199	5.35348e-10	5.86253e-20	0.0132363	TRUE	TRUE	FALSE	down.early	4130	5156	5381	1229	2186	1524	2066	2666	2563	1.23716	-0.962295	-0.274864	12.3138	10.8051	11.2766
chr12	109116595	109268226	151632	+	ACACB	protein_coding	ENSG00000076555	ENSG00000076555.15	58.3444	0.124967	3.47667	-3.20354	0.75993	7.55145e-09	7.23457e-09	FALSE	TRUE	TRUE	down.late	6	6	17	126	97	142	24	25	14	-0.613024	1.24138	-0.628358	6.88905	8.09206	6.8791
chr17	28744005	28750956	6952	+	TRAF4	protein_coding	ENSG00000076604	ENSG00000076604.15	3540.69	0.180799	-0.315763	0.522137	0.360628	0.0698882	0.00240638	FALSE	FALSE	TRUE	up.late	2670	4416	4146	3099	2922	2294	4025	4738	3690	0.181116	-1.03706	0.855943	11.8788	11.4944	12.0917
chr8	80967810	81112068	144259	-	PAG1	protein_coding	ENSG00000076641	ENSG00000076641.4	216.716	6.21507	5.52016	0.434166	2.35871e-39	2.92786e-31	0.0958959	TRUE	TRUE	FALSE	up.early	8	5	4	183	378	265	224	359	326	-1.27653	0.428192	0.848341	6.64487	8.57197	9.04692
chr10	103087185	103277605	190421	-	NT5C2	protein_coding	ENSG00000076685	ENSG00000076685.19	2227.03	0.106482	-0.563459	0.703802	0.680496	0.00725192	0.000918266	FALSE	TRUE	TRUE	up.late	2070	2103	2890	1197	1929	1782	2214	2927	2670	0.370676	-1.08392	0.713242	11.3256	10.6768	11.4784
chr11	119308529	119321521	12993	-	MCAM	protein_coding	ENSG00000076706	ENSG00000076706.17	756.681	-7.22868	-0.582805	-6.52881	6.32696e-94	0.00281558	1.21658e-76	TRUE	TRUE	TRUE	down.late	1281	1511	1422	942	1041	774	4	9	12	0.82761	0.485203	-1.31281	10.5863	9.97486	6.76419
chrX	133300103	133415489	115387	-	GPC4	protein_coding	ENSG00000076716	ENSG00000076716.9	196.939	2.24697	1.12801	0.99099	2.36787e-25	2.60947e-07	8.3096e-07	TRUE	TRUE	TRUE	up.early	75	73	64	160	181	170	306	389	354	-1.11723	-0.0476647	1.1649	7.6207	8.24297	8.94844
chrX	132369317	132489968	120652	-	MBNL3	protein_coding	ENSG00000076770	ENSG00000076770.14	988.671	-0.972434	-0.472152	-0.340891	1.31783e-05	0.0257741	0.109755	TRUE	FALSE	FALSE	down.early	1142	1353	1757	602	1053	1082	591	657	706	1.07029	-0.156855	-0.913433	10.5894	10.0102	9.65313
chr19	7595863	7618304	22442	+	CAMSAP3	protein_coding	ENSG00000076826	ENSG00000076826.10	796.389	-0.520416	-1.68419	1.10568	0.000802117	8.58997e-27	3.32796e-12	TRUE	TRUE	TRUE	down.early	889	1441	1266	388	480	292	758	881	778	1.00789	-1.2357	0.227804	10.4026	8.99445	9.913
chr1	21596215	21669363	73149	-	RAP1GAP	protein_coding	ENSG00000076864	ENSG00000076864.19	216.079	1.99601	-0.235161	2.33155	1.24033e-21	0.268162	4.00911e-28	TRUE	FALSE	TRUE	up.late	101	119	106	86	89	91	430	534	380	-0.539529	-0.773457	1.31299	7.90959	7.74478	9.21473
chr2	233354494	233472104	117611	+	DGKD	protein_coding	ENSG00000077044	ENSG00000077044.11	2852.79	2.06776	0.512755	1.49665	8.26221e-51	0.00022974	2.33956e-27	TRUE	TRUE	TRUE	up.late	1083	1441	1395	2130	2430	1856	4311	5632	4194	-0.931319	-0.349291	1.28061	10.4738	10.9901	12.4358
chr10	102394110	102402524	8415	+	NFKB2	protein_coding	ENSG00000077150	ENSG00000077150.20	2865.77	1.71003	-0.196125	1.97445	5.85664e-21	0.301541	2.517e-27	TRUE	FALSE	TRUE	up.late	1282	1893	1748	1519	1631	1115	5683	6629	4346	-0.511577	-0.78506	1.29664	10.8194	10.5708	12.4633
chr1	202331657	202341980	10324	-	UBE2T	protein_coding	ENSG00000077152	ENSG00000077152.11	963.355	0.9255	0.0638143	0.820607	6.52945e-06	0.801322	6.47281e-05	TRUE	FALSE	TRUE	up.late	642	781	674	540	1115	707	1378	1565	1274	-0.662864	-0.546066	1.20893	9.73317	9.78885	10.6254
chr1	202348699	202592706	244008	+	PPP1R12B	protein_coding	ENSG00000077157	ENSG00000077157.22	960.282	0.0526903	-0.474524	0.535771	0.824695	0.00726333	0.00233757	FALSE	TRUE	TRUE	up.late	752	1054	1283	631	983	741	858	1263	1089	0.449715	-1.13101	0.6813	10.2261	9.74566	10.2965
chr2	182716041	182794464	78424	+	DNAJC10	protein_coding	ENSG00000077232	ENSG00000077232.18	4301.75	-0.548262	-0.419776	-0.100017	3.31546e-06	0.000356771	0.507702	TRUE	TRUE	FALSE	down.early	4200	5507	6417	3261	5209	4202	3220	3473	3671	1.25908	-0.418053	-0.841029	12.4334	11.9885	11.8763
chr16	27459555	27549913	90359	-	GTF3C1	protein_coding	ENSG00000077235	ENSG00000077235.18	7213.88	-0.53934	-0.214235	-0.261599	0.000955146	0.208503	0.120413	TRUE	FALSE	FALSE	down.early	6782	9745	10239	6860	7416	6415	5214	6502	5934	0.971961	0.0181384	-0.9901	13.1056	12.8257	12.5298
chr16	27313668	27364778	51111	+	IL4R	protein_coding	ENSG00000077238	ENSG00000077238.14	3141.36	0.0330468	-0.35911	0.397316	0.861911	0.00714783	0.00291184	FALSE	TRUE	TRUE	up.late	3052	3540	3829	2546	2871	2521	2773	3645	3480	0.52223	-1.20064	0.678411	11.7888	11.3998	11.8241
chr1	77695987	77759852	63866	-	USP33	protein_coding	ENSG00000077254	ENSG00000077254.14	1923.51	-0.467074	-0.0394065	-0.39499	0.00336524	0.857271	0.0113592	TRUE	FALSE	FALSE	down.late	1850	2053	2472	1688	2586	2367	1386	1541	1497	0.68103	0.456876	-1.13791	11.176	11.1178	10.7036
chrX	110944285	111227361	283077	+	PAK3	protein_coding	ENSG00000077264	ENSG00000077264.15	108.843	0.866601	2.26295	-1.07634	0.00402734	6.86196e-12	0.000464216	TRUE	TRUE	TRUE	up.early	44	49	48	168	254	206	60	62	74	-1.00935	1.18215	-0.172793	7.28623	8.40559	7.71352
chr19	41386374	41397359	10986	-	EXOSC5	protein_coding	ENSG00000077348	ENSG00000077348.9	1368.4	0.588508	0.267685	0.241041	0.00108945	0.138185	0.194522	TRUE	FALSE	FALSE	up.early	821	1332	1068	1629	1442	1069	1706	1827	1477	-0.973679	0.0034314	0.970247	10.2439	10.5423	10.8376
chr2	171687409	171750158	62750	+	DYNC1I2	protein_coding	ENSG00000077380	ENSG00000077380.16	3789.29	-0.481739	-0.148675	-0.301133	4.58663e-05	0.27134	0.0131649	TRUE	FALSE	FALSE	down.early	3803	4494	4963	3074	4866	3772	2964	3490	2931	0.964044	0.22953	-1.19357	12.1473	11.9816	11.6606
chr7	100574011	100586129	12119	-	LRCH4	protein_coding	ENSG00000077454	ENSG00000077454.16	1304.11	-1.48882	-1.44624	-0.034735	8.90042e-24	2.25475e-22	0.878967	TRUE	TRUE	FALSE	down.early	1662	2619	2626	734	1065	750	768	886	729	1.31578	-0.630822	-0.684953	11.25	9.92324	9.88635
chr11	74493851	74669117	175267	+	POLD3	protein_coding	ENSG00000077514	ENSG00000077514.9	1207.05	-0.575807	-0.096613	-0.426326	0.000615208	0.635847	0.00987298	TRUE	FALSE	TRUE	down.late	1233	1520	1448	1061	1749	1228	677	830	1276	0.773199	0.377898	-1.1511	10.6094	10.493	10.0429
chr1	236142505	236221865	79361	+	GPR137B	protein_coding	ENSG00000077585	ENSG00000077585.14	185.333	1.48006	0.783836	0.464973	6.18608e-09	0.00132232	0.0372362	TRUE	TRUE	FALSE	up.early	83	76	118	114	240	206	272	315	268	-1.11028	0.0580885	1.05219	7.79431	8.29493	8.72089
chr4	128809700	128875224	65525	+	JADE1	protein_coding	ENSG00000077684	ENSG00000077684.16	1361.28	-0.994058	-0.0464173	-0.918467	1.56894e-05	0.867489	7.93476e-05	TRUE	FALSE	TRUE	down.late	1230	1653	1677	1530	2173	1581	694	788	841	0.640504	0.524653	-1.16516	10.8206	10.7585	9.85328
chrX	119399336	119454478	55143	+	SLC25A43	protein_coding	ENSG00000077713	ENSG00000077713.19	812.629	0.022555	0.465916	-0.439498	0.91171	0.000742465	0.00149467	FALSE	TRUE	TRUE	down.late	598	736	797	859	1163	1033	645	795	720	-0.66944	1.25045	-0.581012	9.73867	10.181	9.75905
chr8	38400215	38468834	68620	-	FGFR1	protein_coding	ENSG00000077782	ENSG00000077782.21	852.375	-1.19209	0.228794	-1.52536	2.69715e-10	0.226122	2.02568e-15	TRUE	FALSE	TRUE	down.late	595	1035	1215	1101	1449	1016	337	422	532	0.404654	0.856667	-1.26132	10.1096	10.3869	9.08743
chr22	45502238	45601135	98898	+	FBLN1	protein_coding	ENSG00000077942	ENSG00000077942.19	3617.63	-0.562443	0.288615	-0.926553	0.00136989	0.0975046	1.35515e-07	TRUE	FALSE	TRUE	down.late	3278	3921	3581	5289	5347	4248	2276	2872	1944	0.182054	0.962076	-1.14413	11.9026	12.2543	11.3046
chr2	209424058	209734118	310061	+	MAP2	protein_coding	ENSG00000078018	ENSG00000078018.20	560.907	-3.1973	-2.55551	-0.425346	3.17964e-30	1.70713e-20	0.0776316	TRUE	TRUE	FALSE	down.early	1196	1191	1423	154	328	269	90	143	144	1.29312	-0.487613	-0.805511	10.5148	8.44937	8.08066
chr3	183015218	183116075	100858	-	MCCC1	protein_coding	ENSG00000078070	ENSG00000078070.13	1006.08	0.198746	-0.191243	0.399919	0.179966	0.191961	0.00291692	FALSE	FALSE	TRUE	up.late	799	1062	1199	739	953	864	1129	1351	1025	0.00355525	-1.05153	1.04798	10.1656	9.96998	10.3593
chr3	183122215	183163839	41625	-	LAMP3	protein_coding	ENSG00000078081	ENSG00000078081.8	5.44755	0.64982	-0.909671	3.42726	0.152414	0.0820222	0.00264459	FALSE	FALSE	TRUE	up.late	6	1	3	1	0	0	10	16	11	-0.060451	-1.0374	1.09785	6.57363	6.33924	6.85153
chr2	162170684	162245151	74468	-	FAP	protein_coding	ENSG00000078098	ENSG00000078098.14	1107.9	-3.09125	-0.747153	-2.18048	1.48892e-36	0.00102814	7.10955e-19	TRUE	TRUE	TRUE	down.late	1885	1613	2079	871	1256	1114	207	214	312	0.961636	0.279491	-1.24113	11.043	10.2605	8.51619
chr10	20779973	21293011	513039	-	NEBL	protein_coding	ENSG00000078114	ENSG00000078114.19	2078.11	-4.77003	-0.671975	-4.01266	6.83769e-137	0.000148062	1.2681e-96	TRUE	TRUE	TRUE	down.late	3236	3794	4653	1816	2216	2591	119	167	138	0.858681	0.447999	-1.30668	11.9572	11.223	8.08606
chr12	2877223	2941138	63916	+	TULP3	protein_coding	ENSG00000078246	ENSG00000078246.17	722.39	-0.501186	-0.0781694	-0.381971	0.00141312	0.695757	0.0139178	TRUE	FALSE	FALSE	down.late	717	824	934	522	1012	843	470	629	636	0.788478	0.376336	-1.16481	9.93393	9.8379	9.47885
chr6	157981863	158099176	117314	+	SYNJ2	protein_coding	ENSG00000078269	ENSG00000078269.15	2187.33	0.647678	0.317324	0.256343	7.03059e-05	0.0513145	0.130359	TRUE	FALSE	FALSE	up.early	1320	1892	1705	2396	3011	2255	2109	2588	2424	-1.05285	0.0475428	1.00531	10.8217	11.1767	11.4857
chr7	27162438	27175180	12743	-	HOXA9	protein_coding	ENSG00000078399	ENSG00000078399.19	336.541	1.13439	0.103409	1.00706	1.71726e-14	0.581673	1.15125e-11	TRUE	FALSE	TRUE	up.late	190	257	267	249	303	242	485	546	462	-0.76469	-0.556346	1.32104	8.53663	8.62175	9.3888
chr6	12290361	12297194	6834	+	EDN1	protein_coding	ENSG00000078401	ENSG00000078401.7	120.92	-2.67386	-3.58111	0.556191	1.4795e-14	2.07483e-22	0.0594849	TRUE	TRUE	FALSE	down.early	288	262	320	12	44	18	35	38	57	1.29086	-0.825526	-0.465336	8.76484	7.03918	7.33287
chr8	42391624	42405937	14314	+	VDAC3	protein_coding	ENSG00000078668	ENSG00000078668.14	5982.89	-0.731377	-0.435185	-0.25739	4.40556e-11	0.000105558	0.0309299	TRUE	TRUE	FALSE	down.early	6527	8541	8081	5162	6877	5197	4256	4609	4820	1.21271	-0.183985	-1.02872	12.9497	12.4888	12.21
chr8	17922840	18027975	105136	+	PCM1	protein_coding	ENSG00000078674	ENSG00000078674.18	4262.01	-1.0963	-0.732075	-0.29163	2.98158e-12	3.40984e-06	0.0732947	TRUE	TRUE	FALSE	down.early	4929	6139	7087	2718	4315	3847	2996	3024	3031	1.22629	-0.294517	-0.931772	12.6567	11.8739	11.5459
chr17	77959240	78108835	149596	+	TNRC6C	protein_coding	ENSG00000078687	ENSG00000078687.17	507.221	-0.558719	0.0254828	-0.564656	0.00224389	0.919617	0.00144065	TRUE	FALSE	TRUE	down.late	520	511	635	540	823	584	247	373	430	0.547679	0.637537	-1.18522	9.48486	9.51055	8.98935
chr20	33490075	33650036	159962	+	CBFA2T2	protein_coding	ENSG00000078699	ENSG00000078699.22	1184.83	-0.372853	-0.574601	0.183616	0.0116791	5.48021e-05	0.25176	FALSE	TRUE	FALSE	down.early	1106	1648	1711	990	1166	789	967	1257	1120	1.16031	-0.95292	-0.207394	10.6715	10.1072	10.3063
chr20	34363241	34540748	177508	+	ITCH	protein_coding	ENSG00000078747	ENSG00000078747.16	5642.7	0.758188	-0.261769	1.11535	1.66973e-05	0.143022	6.00733e-10	TRUE	FALSE	TRUE	up.late	3795	4807	5890	2885	4554	4016	7778	10003	7177	-0.286745	-0.913949	1.20069	12.2538	11.9135	13.0609
chr20	34704339	34713439	9101	+	TP53INP2	protein_coding	ENSG00000078804	ENSG00000078804.13	342.547	-0.839621	0.0117023	-0.848958	0.000278649	0.970964	0.000265443	TRUE	FALSE	TRUE	down.late	302	390	536	305	473	483	193	275	160	0.575585	0.591718	-1.1673	9.10038	9.10662	8.4261
chr1	1216909	1232067	15159	-	SDF4	protein_coding	ENSG00000078808	ENSG00000078808.19	5578.68	-0.440364	-0.141732	-0.249649	0.00749743	0.440037	0.13942	TRUE	FALSE	FALSE	down.early	4351	8165	6828	6584	5861	4672	4550	5285	4350	0.843728	0.147369	-0.991096	12.6806	12.5024	12.2112
chr1	3652516	3736201	83686	+	TP73	protein_coding	ENSG00000078900	ENSG00000078900.15	5.86214	3.85257	3.88287	-0.0427978	0.00166702	0.00123266	0.921327	TRUE	TRUE	FALSE	up.early	0	0	0	14	13	3	6	11	4	-1.17454	0.644029	0.530515	6.28361	6.75856	6.72891
chr7	43926436	43956136	29701	+	UBE2D4	protein_coding	ENSG00000078967	ENSG00000078967.13	440.42	-0.808861	-0.814738	0.00894804	3.99013e-05	3.87891e-05	0.981457	TRUE	TRUE	FALSE	down.early	563	614	690	261	454	338	266	369	405	1.22864	-0.638652	-0.589987	9.61796	8.90134	8.92002
chr2	178463664	178478600	14937	-	FKBP7	protein_coding	ENSG00000079150	ENSG00000079150.18	123.581	-0.727395	1.80574	-2.95028	0.0339014	6.45321e-06	3.84651e-12	FALSE	TRUE	TRUE	down.late	43	76	98	208	291	291	31	31	23	-0.328509	1.23597	-0.907465	7.58072	8.66914	7.17794
chr2	178194481	178402893	208413	+	OSBPL6	protein_coding	ENSG00000079156	ENSG00000079156.17	508.217	-1.74652	-0.0665077	-1.65329	4.63244e-17	0.786262	2.84033e-15	TRUE	FALSE	TRUE	down.late	598	682	767	524	827	731	137	163	270	0.712625	0.587413	-1.30004	9.7041	9.62123	8.37197
chr5	36606355	36688334	81980	+	SLC1A3	protein_coding	ENSG00000079215	ENSG00000079215.14	495.337	1.22276	1.22597	0.0022451	4.07061e-10	5.29414e-10	0.997845	TRUE	TRUE	FALSE	up.early	237	236	285	484	868	729	447	602	629	-1.27394	0.623595	0.650342	8.61271	9.56425	9.57766
chr3	158645822	158672648	26827	-	LXN	protein_coding	ENSG00000079257	ENSG00000079257.8	1083.29	2.6322	-0.499208	3.37243	9.46758e-19	0.049108	2.63464e-29	TRUE	FALSE	TRUE	up.late	306	394	508	209	220	306	3125	3238	1404	-0.434677	-0.830078	1.26476	9.0889	8.56418	11.3442
chr2	217799588	218033982	234395	-	TNS1	protein_coding	ENSG00000079308	ENSG00000079308.19	92.3688	0.772746	3.84328	-2.55652	0.0440418	1.11936e-13	9.35643e-09	FALSE	TRUE	TRUE	down.late	8	7	11	282	303	322	46	31	36	-0.827613	1.26139	-0.433778	6.90305	8.49568	7.2033
chr1	100345001	100520277	175277	+	CDC14A	protein_coding	ENSG00000079335	ENSG00000079335.20	117.103	-0.312643	-0.706742	0.319157	0.170511	0.00123266	0.139223	FALSE	TRUE	FALSE	down.early	125	142	184	75	133	85	78	114	125	1.07279	-1.0755	0.00271003	8.16008	7.72243	7.94208
chr12	47734363	47771040	36678	-	RAPGEF3	protein_coding	ENSG00000079337	ENSG00000079337.16	1431.44	0.438222	-1.41	2.36545	0.211644	0.00152259	1.61953e-06	FALSE	TRUE	TRUE	up.late	857	1621	1687	517	353	356	2411	2901	1644	0.25849	-1.16765	0.909156	10.5881	9.02407	11.3017
chr19	42507304	42561234	53931	-	CEACAM1	protein_coding	ENSG00000079385	ENSG00000079385.23	2530.29	2.53318	-1.43279	4.08256	7.50928e-23	3.57504e-08	6.08055e-56	TRUE	TRUE	TRUE	up.late	846	868	1295	251	485	403	5849	8378	4293	-0.237485	-0.998368	1.23585	10.1923	8.95162	12.5947
chr19	42268537	42295797	27261	+	CIC	protein_coding	ENSG00000079432	ENSG00000079432.7	4844.22	0.403507	0.472728	-0.0713234	0.000128063	4.53065e-06	0.615912	TRUE	TRUE	FALSE	up.early	2822	4326	4326	5697	6125	4863	4678	6024	5232	-1.29244	0.817251	0.475192	11.9726	12.4604	12.3813
chr19	42401514	42427388	25875	-	LIPE	protein_coding	ENSG00000079435	ENSG00000079435.10	857.757	-0.567102	-0.284031	-0.212789	0.000870336	0.0942063	0.24029	TRUE	FALSE	FALSE	down.early	801	1167	1153	750	1024	722	635	843	649	1.05441	-0.107209	-0.947199	10.2407	9.925	9.69673
chr8	11795573	11839304	43732	+	FDFT1	protein_coding	ENSG00000079459	ENSG00000079459.13	23589.4	-0.572333	-0.472709	-0.0717951	1.02609e-05	0.00024534	0.686633	TRUE	TRUE	FALSE	down.early	23841	32680	34203	19932	23755	20767	18575	23438	16554	1.24293	-0.467892	-0.77504	14.8826	14.3653	14.2724
chrX	68042344	68433913	391570	-	OPHN1	protein_coding	ENSG00000079482	ENSG00000079482.13	551.041	-0.752542	-1.30844	0.45002	8.82797e-06	2.43104e-14	0.00796126	TRUE	TRUE	TRUE	down.early	755	840	1042	340	474	399	315	424	402	1.19743	-1.0169	-0.180529	9.94694	8.88433	9.28569
chr16	29790719	29805384	14666	+	KIF22	protein_coding	ENSG00000079616	ENSG00000079616.13	4787.15	-0.481105	-0.48758	0.0206104	0.000997951	0.000656807	0.930726	TRUE	TRUE	FALSE	down.early	5018	7411	5878	3993	5163	3501	4060	4644	3736	1.20293	-0.646312	-0.55662	12.5864	12.0613	12.0868
chr6	25279078	25620530	341453	+	CARMIL1	protein_coding	ENSG00000079691	ENSG00000079691.18	1892.17	-1.01892	-0.752362	-0.197732	6.23393e-09	1.79004e-05	0.296452	TRUE	TRUE	FALSE	down.early	2421	2818	3306	1165	2053	1662	1001	1373	1458	1.22389	-0.38229	-0.841597	11.521	10.7354	10.5108
chr2	15591178	15634346	43169	+	DDX1	protein_coding	ENSG00000079785	ENSG00000079785.16	5851.01	0.584474	0.163435	0.382335	1.7051e-06	0.237843	0.00194346	TRUE	FALSE	TRUE	up.late	4109	5093	5110	4950	6590	5229	6497	7225	8003	-0.941294	-0.270649	1.21194	12.2674	12.453	12.8632
chr19	10718079	10833488	115410	+	DNM2	protein_coding	ENSG00000079805	ENSG00000079805.18	6339.91	-0.442332	-0.20034	-0.214745	3.32106e-05	0.0795067	0.0616121	TRUE	FALSE	FALSE	down.early	5893	8150	8066	5825	7591	5983	4945	6064	4959	1.10584	0.0209721	-1.12681	12.8771	12.6568	12.4236
chr6	130839347	131063322	223976	-	EPB41L2	protein_coding	ENSG00000079819	ENSG00000079819.19	1154.42	1.5564	1.28808	0.183221	2.83017e-13	1.65862e-09	0.399457	TRUE	TRUE	FALSE	up.early	419	549	593	1107	1756	1482	1142	1658	1690	-1.25758	0.467456	0.790129	9.36499	10.5408	10.7607
chr6	132296055	132401475	105421	-	MOXD1	protein_coding	ENSG00000079931	ENSG00000079931.15	20.58	3.15479	5.38025	-1.61783	0.00117173	4.05159e-07	0.000825978	TRUE	TRUE	TRUE	up.early	2	0	0	53	74	49	12	12	9	-1.11103	1.14248	-0.0314484	6.37605	7.38678	6.86026
chr22	50767501	50783662	16162	-	RABL2B	protein_coding	ENSG00000079974	ENSG00000079974.18	527.697	-0.993223	-0.0790055	-0.893716	1.27711e-11	0.677851	1.43344e-09	TRUE	FALSE	TRUE	down.late	495	633	685	544	749	616	292	397	323	0.7536	0.552093	-1.30569	9.64604	9.5676	8.84449
chr19	10486125	10503558	17434	-	KEAP1	protein_coding	ENSG00000079999	ENSG00000079999.14	2399.2	-0.79807	0.0881418	-0.909584	3.02346e-08	0.634089	3.40437e-10	TRUE	FALSE	TRUE	down.late	2246	3168	2836	3296	3259	2389	1459	1641	1435	0.529087	0.74945	-1.27854	11.4923	11.5879	10.7075
chr19	55181247	55209506	28260	-	PTPRH	protein_coding	ENSG00000080031	ENSG00000080031.10	250.805	-0.994598	-4.29877	2.97018	0.00369353	1.71381e-24	2.44434e-12	TRUE	TRUE	TRUE	down.early	352	524	630	32	27	33	214	254	60	1.05308	-1.13312	0.0800454	9.36992	7.08349	8.35227
chr20	46345980	46364458	18479	-	SLC35C2	protein_coding	ENSG00000080189	ENSG00000080189.15	1727.85	0.550762	-0.0797546	0.631407	5.2749e-05	0.656326	2.30869e-06	TRUE	FALSE	TRUE	up.late	1273	1703	1661	1343	1707	1378	1974	2348	2078	-0.490222	-0.771404	1.26163	10.6939	10.6067	11.2375
chr3	97822011	97944984	122974	+	CRYBG3	protein_coding	ENSG00000080200	ENSG00000080200.10	1832.34	-0.768507	-0.709215	-0.0290492	0.000264071	0.000703505	0.923886	TRUE	TRUE	FALSE	down.early	2058	2580	3084	1032	2007	1568	1123	1328	1796	1.15509	-0.540266	-0.614827	11.4271	10.6357	10.6009
chr3	96814581	97752460	937880	+	EPHA6	protein_coding	ENSG00000080224	ENSG00000080224.17	5.84115	-4.21195	-3.44503	-0.0381652	0.000804394	0.00213454	0.933011	TRUE	TRUE	FALSE	down.early	21	12	24	1	0	0	1	0	0	1.25119	-0.588711	-0.662482	6.93207	6.36006	6.33713
chr9	3218297	3526004	307708	-	RFX3	protein_coding	ENSG00000080298	ENSG00000080298.15	645.392	1.2208	0.408099	0.57861	1.93696e-06	0.0772582	0.0140094	TRUE	FALSE	FALSE	up.late	330	403	632	371	772	564	694	871	997	-0.912897	-0.17466	1.08756	9.03805	9.44373	10.1374
chr9	1980290	2193624	213335	+	SMARCA2	protein_coding	ENSG00000080503	ENSG00000080503.24	3336.05	0.109262	0.402863	-0.28724	0.486247	0.00163816	0.0310946	FALSE	TRUE	FALSE	up.early	2430	3090	3502	2941	4932	3748	2600	3436	3640	-0.852825	1.1722	-0.319373	11.5736	12.0042	11.687
chr19	9959561	10010504	50944	-	COL5A3	protein_coding	ENSG00000080573	ENSG00000080573.7	18.9955	3.32235	5.27961	-1.24932	0.000947082	1.20028e-06	0.0071756	TRUE	TRUE	TRUE	up.early	1	1	0	35	68	33	18	9	11	-1.11332	1.11712	-0.0037956	6.39648	7.32723	6.85948
chr16	30698209	30741409	43201	+	SRCAP	protein_coding	ENSG00000080603	ENSG00000080603.17	3856.13	-0.637976	-0.171347	-0.39785	0.000125166	0.344394	0.0158024	TRUE	FALSE	FALSE	down.late	4083	4506	5660	3150	5331	4273	1881	3079	3460	0.870294	0.256432	-1.12673	12.2335	12.0234	11.5499
chr9	2720469	2844095	123627	-	PUM3	protein_coding	ENSG00000080608	ENSG00000080608.10	2748.86	1.16884	0.508558	0.579288	3.36407e-16	0.000413095	4.65395e-05	TRUE	TRUE	TRUE	up.early	1501	1750	1889	1941	3556	2663	3664	3676	4198	-1.09422	-0.0560499	1.15027	10.87	11.3954	12.0059
chr7	135361795	135510127	148333	-	CNOT4	protein_coding	ENSG00000080802	ENSG00000080802.19	721.19	-0.823139	-0.222002	-0.447395	0.000699961	0.341545	0.0495241	TRUE	FALSE	FALSE	down.early	806	830	1157	442	979	792	384	533	576	0.859851	0.109471	-0.969322	10.0842	9.7549	9.28147
chr14	73136418	73223691	87274	+	PSEN1	protein_coding	ENSG00000080815	ENSG00000080815.19	2324.51	-0.463898	-0.224872	-0.178412	0.0092194	0.213395	0.353771	TRUE	FALSE	FALSE	down.early	2439	2730	3308	1738	2638	2259	1724	2245	1907	0.937424	-0.100128	-0.837296	11.5065	11.2246	11.0244
chr3	98579446	98593648	14203	-	CPOX	protein_coding	ENSG00000080819	ENSG00000080819.9	1377.4	0.542917	0.0618755	0.451284	5.41542e-05	0.739723	0.000691441	TRUE	FALSE	TRUE	up.late	891	1328	1282	1193	1501	1082	1574	1745	1875	-0.753426	-0.497103	1.25053	10.3611	10.4277	10.8817
chr3	98497912	98523066	25155	-	CLDND1	protein_coding	ENSG00000080822	ENSG00000080822.17	2543.67	0.352812	-0.546487	0.9303	0.00212012	9.73738e-07	3.64767e-17	TRUE	TRUE	TRUE	up.late	2084	2619	3166	1203	2327	1816	3001	3828	3175	0.157453	-1.21411	1.05666	11.4127	10.8697	11.7686
chr14	102224500	102305190	80691	-	MOK	protein_coding	ENSG00000080823	ENSG00000080823.23	1824.07	1.47328	0.384133	1.03204	5.25463e-29	0.00428544	5.9263e-15	TRUE	TRUE	TRUE	up.late	906	1206	1168	1288	1798	1244	2568	3049	3133	-0.944939	-0.325186	1.27013	10.2375	10.6227	11.6142
chr14	102080742	102139699	58958	-	HSP90AA1	protein_coding	ENSG00000080824	ENSG00000080824.19	73656.6	0.813626	0.0391268	0.743081	1.33617e-05	0.876139	6.44957e-05	TRUE	FALSE	TRUE	up.late	50803	58216	58935	42613	88244	53307	95499	104991	113959	-0.624784	-0.57483	1.19961	15.791	15.8155	16.6837
chr20	36306336	36528637	222302	+	DLGAP4	protein_coding	ENSG00000080845	ENSG00000080845.18	1813.3	0.996555	0.389653	0.494084	1.5816e-08	0.0250607	0.00422642	TRUE	FALSE	TRUE	up.early	1030	1234	1425	1470	2229	1953	2137	2601	2048	-1.03281	-0.069301	1.10211	10.4084	10.8448	11.3753
chr11	133896438	133956968	60531	-	IGSF9B	protein_coding	ENSG00000080854	ENSG00000080854.16	735.169	-1.71949	-0.545258	-0.922503	1.39503e-10	0.0214171	0.000349187	TRUE	FALSE	TRUE	down.early	740	1177	1295	789	947	613	266	356	342	1.01698	0.0812272	-1.09821	10.3449	9.69917	8.88529
chr1	16467436	16499257	31822	-	CROCCP3	transcribed_unprocessed_pseudogene	ENSG00000080947	ENSG00000080947.15	112.657	2.06519	1.71947	0.130913	1.81028e-06	5.84495e-05	0.681062	TRUE	TRUE	FALSE	up.early	31	49	67	104	133	82	112	162	125	-1.09185	0.404704	0.687147	7.22093	8.03407	8.18754
chr15	50908672	51005895	97224	+	AP4E1	protein_coding	ENSG00000081014	ENSG00000081014.11	1013.27	-0.393233	0.0652414	-0.450564	0.0149157	0.753372	0.00363657	FALSE	FALSE	TRUE	down.late	940	1131	1216	921	1391	1219	631	837	914	0.435538	0.717158	-1.1527	10.2724	10.3405	9.88823
chr4	74097040	74099196	2157	-	CXCL2	protein_coding	ENSG00000081041	ENSG00000081041.9	225.404	2.64824	0.252237	2.26151	1.39473e-29	0.260839	7.65555e-23	TRUE	FALSE	TRUE	up.late	72	81	73	86	135	80	456	473	627	-0.761736	-0.548142	1.30988	7.66743	7.83804	9.32218
chr2	227002714	227164453	161740	-	COL4A4	protein_coding	ENSG00000081052	ENSG00000081052.13	26.6689	-2.48805	-0.0760388	-2.10161	0.00052053	0.833076	0.00221566	TRUE	FALSE	TRUE	down.late	29	48	52	43	38	22	3	2	5	0.663074	0.394518	-1.05759	7.27608	7.17959	6.65786
chr5	134114681	134151865	37185	+	TCF7	protein_coding	ENSG00000081059	ENSG00000081059.20	707.646	0.940635	-0.579238	1.67303	1.39308e-06	0.00284705	1.2355e-16	TRUE	TRUE	TRUE	up.late	508	545	560	306	454	372	1105	1414	1110	-0.189753	-1.00513	1.19489	9.49212	8.97414	10.3717
chr3	101574180	101594465	20286	+	PCNP	protein_coding	ENSG00000081154	ENSG00000081154.12	4302.63	0.508793	0.0568797	0.42315	0.000173625	0.762154	0.00161411	TRUE	FALSE	TRUE	up.late	2947	3772	4265	3071	4567	4027	5281	6145	4995	-0.735896	-0.484046	1.21994	11.9033	11.9703	12.4236
chr14	69191511	69244020	52510	+	EXD2	protein_coding	ENSG00000081177	ENSG00000081177.18	1132.33	-0.336832	0.137791	-0.481553	0.0300691	0.422573	0.00105296	FALSE	FALSE	TRUE	down.late	973	1224	1418	1142	1479	1178	789	1028	978	0.254186	0.877803	-1.13199	10.3683	10.5155	10.041
chr3	132654446	132679794	25349	+	UBA5	protein_coding	ENSG00000081307	ENSG00000081307.14	1828.84	0.911319	0.313149	0.506702	2.03987e-08	0.0560856	0.00161833	TRUE	FALSE	TRUE	up.early	1034	1594	1618	1604	1970	1675	2038	2224	2409	-0.993829	-0.155114	1.14894	10.4882	10.8341	11.372
chr9	96490241	96619843	129603	-	CDC14B	protein_coding	ENSG00000081377	ENSG00000081377.17	725.733	1.10291	0.934675	0.136799	1.08998e-14	8.40215e-11	0.415536	TRUE	TRUE	FALSE	up.early	343	456	541	747	849	901	781	942	932	-1.29737	0.483402	0.813971	9.14125	9.92895	10.0752
chr9	96755865	96778129	22265	-	ZNF510	protein_coding	ENSG00000081386	ENSG00000081386.12	683.576	0.456373	0.639849	-0.155083	0.0212529	0.000868576	0.468758	FALSE	TRUE	FALSE	up.early	405	528	642	604	1114	942	596	699	676	-1.08605	0.836275	0.249772	9.31878	9.93947	9.7501
chr19	19785839	19821751	35913	-	ZNF506	protein_coding	ENSG00000081665	ENSG00000081665.14	92.4653	-8.66372	-9.43127	0.126369	2.34706e-14	5.36794e-17	0.751228	TRUE	TRUE	FALSE	down.early	204	258	338	0	0	0	1	0	0	1.33072	-0.687439	-0.643283	8.70569	6.28361	6.33661
chr1	227730425	227735411	4987	-	JMJD4	protein_coding	ENSG00000081692	ENSG00000081692.12	1268.37	0.919548	0.658969	0.189695	2.1215e-07	0.00019704	0.322663	TRUE	TRUE	FALSE	up.early	706	1050	834	1686	1342	1016	1534	1673	1527	-1.19398	0.315636	0.878347	9.90866	10.5525	10.7925
chr12	125065434	125143333	77900	+	AACS	protein_coding	ENSG00000081760	ENSG00000081760.17	2825.21	-0.45932	-0.201157	-0.212071	0.00173731	0.1943	0.17535	TRUE	FALSE	FALSE	down.early	2565	4014	3503	3196	2938	2402	2075	2530	2386	1.01307	-0.0148566	-0.998215	11.7609	11.52	11.2897
chr5	141923855	141942047	18193	+	DELE1	protein_coding	ENSG00000081791	ENSG00000081791.9	2087.92	-0.301052	0.082634	-0.381132	0.0381704	0.644856	0.00592694	FALSE	FALSE	TRUE	down.late	1546	2290	2239	2365	2454	2361	1751	2188	1649	0.351954	0.787083	-1.13904	11.1898	11.2801	10.8805
chr7	122318411	122886759	568349	-	CADPS2	protein_coding	ENSG00000081803	ENSG00000081803.16	444.816	1.09647	1.4511	-0.265975	4.76603e-10	3.63416e-16	0.130942	TRUE	TRUE	FALSE	up.early	206	223	219	577	678	648	425	509	537	-1.26853	0.898158	0.37037	8.48586	9.58491	9.31719
chr5	141121818	141125623	3806	+	PCDHB4	protein_coding	ENSG00000081818	ENSG00000081818.4	24.8416	3.65202	0.901179	1.95077	4.05236e-09	0.0351065	2.4779e-05	TRUE	FALSE	TRUE	up.late	5	3	2	11	18	14	53	85	53	-0.933415	-0.320365	1.25378	6.61604	6.85887	7.48241
chr5	140827958	141012347	184390	+	PCDHA6	protein_coding	ENSG00000081842	ENSG00000081842.18	143.089	1.73015	1.93375	-0.135165	1.26554e-12	1.55384e-15	0.565709	TRUE	TRUE	FALSE	up.early	47	40	59	237	260	202	162	179	141	-1.29995	0.777372	0.522577	7.4176	8.40598	8.28475
chr18	62715541	62980433	264893	+	PHLPP1	protein_coding	ENSG00000081913	ENSG00000081913.14	2093.41	-0.246188	-0.533909	0.2643	0.142212	0.000516928	0.102543	FALSE	TRUE	FALSE	down.early	1776	2782	2928	1463	2159	1602	1718	2269	2288	0.993005	-1.02935	0.0363428	11.384	10.8261	11.1201
chr18	57646426	57803315	156890	-	ATP8B1	protein_coding	ENSG00000081923	ENSG00000081923.15	1937.62	-0.781743	-2.06673	1.19459	1.65629e-05	1.55955e-28	2.26215e-10	TRUE	TRUE	TRUE	down.early	2410	3557	3959	622	1066	706	1539	1931	1725	1.06314	-1.18924	0.126101	11.7293	9.80637	10.9293
chr7	151238764	151277896	39133	-	SMARCD3	protein_coding	ENSG00000082014	ENSG00000082014.17	141.831	0.351921	2.34049	-1.77935	0.253137	6.87171e-11	4.26832e-07	FALSE	TRUE	TRUE	down.late	26	64	72	335	230	308	89	95	51	-0.808738	1.24622	-0.437486	7.42141	8.75435	7.66222
chr5	37379285	37753435	374151	+	WDR70	protein_coding	ENSG00000082068	ENSG00000082068.9	890.571	-0.0195455	0.318162	-0.3418	0.915948	0.0126513	0.00769948	FALSE	FALSE	TRUE	down.late	656	940	983	1023	1139	917	761	840	788	-0.581261	1.25843	-0.677173	9.91433	10.2293	9.89791
chr5	39105252	39274528	169277	-	FYB1	protein_coding	ENSG00000082074	ENSG00000082074.19	1462.02	0.555889	-1.1587	1.80861	0.00234665	4.73522e-10	2.64297e-22	TRUE	TRUE	TRUE	up.late	1056	1458	1890	448	724	817	2011	2575	2246	0.219622	-1.21999	1.00037	10.6636	9.59229	11.2446
chr2	201387858	201480846	92989	+	STRADB	protein_coding	ENSG00000082146	ENSG00000082146.13	972.949	-1.1221	0.189991	-1.36577	1.99218e-16	0.198848	3.06903e-23	TRUE	FALSE	TRUE	down.late	891	1131	1230	1071	1529	1397	465	541	528	0.468495	0.834064	-1.30256	10.3046	10.5053	9.33274
chr2	200810594	200827338	16745	+	BZW1	protein_coding	ENSG00000082153	ENSG00000082153.18	20095.5	0.011864	0.43863	-0.425536	0.951143	0.000529801	0.000808059	FALSE	TRUE	TRUE	down.late	14395	18605	22158	21197	29270	26422	16160	17852	16694	-0.634929	1.23723	-0.602303	14.122	14.6023	14.1304
chr5	34017858	34043213	25356	-	C1QTNF3	protein_coding	ENSG00000082196	ENSG00000082196.21	23.1192	-1.08898	-0.340124	-0.356805	0.00742084	0.261923	0.252417	TRUE	FALSE	FALSE	down.early	20	39	43	16	34	16	8	15	18	1.05996	-0.0845824	-0.975381	7.23983	7.02081	6.85034
chr6	70412941	70561174	148234	+	FAM135A	protein_coding	ENSG00000082269	ENSG00000082269.17	1209.14	0.748557	-0.227067	1.10049	0.000522274	0.290168	9.7362e-07	TRUE	FALSE	TRUE	up.late	828	1016	1306	496	1225	939	1422	1704	1814	-0.279492	-0.877113	1.1566	10.1718	9.84932	10.9466
chr2	164653624	164843679	190056	-	COBLL1	protein_coding	ENSG00000082438	ENSG00000082438.17	965.835	-0.111441	-0.527504	0.389281	0.645079	0.00726333	0.0468714	FALSE	TRUE	FALSE	down.early	858	1127	1434	472	978	945	891	1084	966	0.705853	-1.05259	0.346741	10.3237	9.7502	10.2066
chrX	70444835	70505490	60656	+	DLG3	protein_coding	ENSG00000082458	ENSG00000082458.12	1871.1	-0.00927435	-0.815353	0.799456	0.971864	2.56685e-06	3.63711e-06	FALSE	TRUE	TRUE	up.late	1951	2675	2869	1030	1490	945	1912	2461	1836	0.642724	-1.24217	0.599442	11.2102	10.3833	11.1912
chr1	215005775	215237090	231316	+	KCNK2	protein_coding	ENSG00000082482	ENSG00000082482.14	103.23	-0.735641	1.17741	-2.26622	0.0175366	0.000280679	1.47259e-10	FALSE	TRUE	TRUE	down.late	75	65	61	154	233	219	28	32	61	-0.223314	1.18753	-0.964218	7.63984	8.37552	7.2535
chr1	211326615	211374946	48332	+	TRAF5	protein_coding	ENSG00000082512	ENSG00000082512.15	405.037	1.35275	1.10111	0.173516	8.21168e-11	1.39515e-07	0.42083	TRUE	TRUE	FALSE	up.early	202	217	218	375	651	416	446	548	542	-1.24934	0.422869	0.826476	8.41399	9.23818	9.43711
chr5	154887411	154938211	50801	-	GEMIN5	protein_coding	ENSG00000082516	ENSG00000082516.9	3930.29	0.744846	0.619431	0.0908803	1.1488e-06	5.15513e-05	0.645019	TRUE	TRUE	FALSE	up.early	2593	2985	2913	3907	5980	3707	3568	4656	5158	-1.23152	0.461958	0.769562	11.4809	12.1301	12.2481
chr17	48048329	48061545	13217	+	NFE2L1	protein_coding	ENSG00000082641	ENSG00000082641.16	10397.7	-0.451998	-0.338374	-0.0745179	0.00380859	0.0273429	0.716522	TRUE	FALSE	FALSE	down.early	9292	14176	15411	9248	10288	8837	8013	10256	8778	1.11212	-0.399785	-0.712332	13.6378	13.2371	13.1543
chr3	122909082	123028605	119524	-	SEMA5B	protein_coding	ENSG00000082684	ENSG00000082684.16	5.72172	3.3095	2.46945	0.0802172	0.00279737	0.00750228	0.836635	TRUE	TRUE	FALSE	up.early	0	1	0	6	6	9	21	17	2	-1.26906	0.544959	0.724106	6.32931	6.73262	6.77245
chr3	119821321	120094994	273674	-	GSK3B	protein_coding	ENSG00000082701	ENSG00000082701.17	5105.32	0.836698	0.0246786	0.803986	6.58094e-13	0.893861	5.36832e-12	TRUE	FALSE	TRUE	up.late	3508	4630	5571	3585	4898	4327	5371	6904	6320	-0.689106	-0.621996	1.3111	12.0137	12.0419	12.8543
chr12	990509	1495933	505425	+	ERC1	protein_coding	ENSG00000082805	ENSG00000082805.20	3305.89	-0.522585	-0.0387415	-0.455753	0.000255809	0.849274	0.00119271	TRUE	FALSE	TRUE	down.late	2835	3868	4326	3524	4812	3827	1895	2606	2641	0.686781	0.531189	-1.21797	11.9266	11.8828	11.3898
chr16	23603160	23641310	38151	-	PALB2	protein_coding	ENSG00000083093	ENSG00000083093.10	1112.95	-0.669114	-0.541226	-0.0796244	0.000198868	0.00224721	0.731453	TRUE	TRUE	FALSE	down.early	1354	1440	1605	609	1247	957	737	999	1152	1.17385	-0.441261	-0.732591	10.6753	10.111	10.0092
chr6	83067666	83171350	103685	+	DOP1A	protein_coding	ENSG00000083097	ENSG00000083097.14	1166.26	-0.535736	-0.482577	-0.0293654	0.000158921	0.00056218	0.893965	TRUE	TRUE	FALSE	down.early	1142	1310	1837	762	1247	1150	949	1115	1054	1.24379	-0.559448	-0.684338	10.6684	10.1938	10.1609
chr6	80106647	80346270	239624	+	BCKDHB	protein_coding	ENSG00000083123	ENSG00000083123.15	738.051	-1.07049	-0.540384	-0.417817	1.25495e-09	0.00181527	0.016776	TRUE	TRUE	FALSE	down.early	861	1116	1251	556	750	637	458	575	459	1.14	-0.102752	-1.03725	10.2276	9.68925	9.28441
chr8	41929479	42051994	122516	-	KAT6A	protein_coding	ENSG00000083168	ENSG00000083168.11	3975.14	-0.537857	-0.389369	-0.0967395	0.00159694	0.0194263	0.646604	TRUE	FALSE	FALSE	down.early	4187	4831	6038	2750	4915	3681	2585	3476	3704	1.10887	-0.360161	-0.748708	12.3282	11.8689	11.7474
chr8	101492439	101669726	177288	+	GRHL2	protein_coding	ENSG00000083307	ENSG00000083307.12	2205.53	-0.771981	-1.64041	0.782443	4.34254e-07	3.39345e-26	3.69112e-07	TRUE	TRUE	TRUE	down.early	2937	3682	3924	925	1520	1009	1668	2086	2141	1.13695	-1.13161	-0.00533393	11.8409	10.2894	11.0597
chr5	72816312	72916733	100422	+	TNPO1	protein_coding	ENSG00000083312	ENSG00000083312.17	7677.52	0.123057	0.519944	-0.377771	0.504979	0.000641858	0.0141613	FALSE	TRUE	FALSE	up.early	5571	6423	7303	7297	12063	10773	6203	7270	6939	-0.807724	1.12326	-0.315535	12.6724	13.2351	12.8158
chr1	11934205	11975538	41334	+	PLOD1	protein_coding	ENSG00000083444	ENSG00000083444.17	10909.9	-1.09477	0.0284899	-1.14306	6.04895e-14	0.895428	1.0688e-14	TRUE	FALSE	TRUE	down.late	9449	14865	15787	13170	14935	12485	5632	7215	5368	0.618074	0.680576	-1.29865	13.6994	13.7359	12.5813
chr17	3672199	3696240	24042	-	P2RX5	protein_coding	ENSG00000083454	ENSG00000083454.22	229.344	2.00452	0.983283	0.869842	1.49134e-20	5.37817e-06	1.57488e-05	TRUE	TRUE	TRUE	up.early	71	100	105	171	276	160	365	424	457	-1.10667	-0.0493	1.15597	7.80678	8.39461	9.06467
chr17	3714628	3801188	86561	-	ITGAE	protein_coding	ENSG00000083457	ENSG00000083457.12	350.1	-0.11093	0.372916	-0.501533	0.600068	0.0275285	0.00295811	FALSE	FALSE	TRUE	down.late	281	336	353	453	484	375	271	274	326	-0.358431	1.17182	-0.81339	8.85339	9.18751	8.75406
chr5	41730065	41870425	140361	-	OXCT1	protein_coding	ENSG00000083720	ENSG00000083720.13	1490.56	-0.919564	-0.0548049	-0.837749	3.52356e-07	0.815403	3.86982e-06	TRUE	FALSE	TRUE	down.late	1574	1736	2058	1305	2286	1843	829	855	1033	0.704439	0.525659	-1.2301	10.9435	10.8614	10.0549
chrX	55717749	55758774	41026	+	RRAGB	protein_coding	ENSG00000083750	ENSG00000083750.13	166.937	-0.151605	0.546618	-0.762904	0.590229	0.0204128	0.00209712	FALSE	FALSE	TRUE	down.late	131	174	195	222	181	216	106	131	113	-0.345868	1.07006	-0.724192	8.10436	8.52736	7.99133
chr16	50742050	50801935	59886	+	CYLD	protein_coding	ENSG00000083799	ENSG00000083799.18	1344.77	-0.425236	-0.47843	0.0579778	0.000555809	7.23041e-05	0.740676	TRUE	TRUE	FALSE	down.early	1321	1785	2025	1134	1202	1107	1143	1328	1158	1.27745	-0.771743	-0.505706	10.8241	10.3535	10.4146
chr19	58479512	58512413	32902	-	SLC27A5	protein_coding	ENSG00000083807	ENSG00000083807.10	735.716	0.56248	0.0819453	0.41374	0.00576185	0.737627	0.0346812	TRUE	FALSE	FALSE	up.late	457	757	615	766	743	490	1028	946	830	-0.666348	-0.394089	1.06044	9.5479	9.63346	10.0905
chr19	58467045	58475436	8392	+	ZNF324	protein_coding	ENSG00000083812	ENSG00000083812.12	749.782	-0.225494	0.335884	-0.581451	0.100977	0.00774534	2.49807e-06	FALSE	TRUE	TRUE	down.late	568	741	820	870	998	938	522	683	642	-0.170085	1.20774	-1.03766	9.75448	10.0784	9.55054
chr19	57719751	57727624	7874	-	ZNF671	protein_coding	ENSG00000083814	ENSG00000083814.13	18.5795	-6.31037	-4.98882	-0.309428	2.26041e-07	2.0893e-08	0.423268	TRUE	TRUE	FALSE	down.early	37	53	84	0	3	1	0	0	1	1.30226	-0.574365	-0.727893	7.44651	6.42554	6.34202
chr19	57571566	57578911	7346	-	ZNF416	protein_coding	ENSG00000083817	ENSG00000083817.9	302.344	0.318902	0.525304	-0.190307	0.046546	0.000468359	0.248291	FALSE	TRUE	FALSE	up.early	197	247	273	350	409	345	283	312	320	-1.19567	1.05559	0.140071	8.56705	8.97786	8.81079
chr4	186587794	186726722	138929	-	FAT1	protein_coding	ENSG00000083857	ENSG00000083857.14	24805.6	0.580053	0.147063	0.395204	2.74416e-06	0.304743	0.00151111	TRUE	FALSE	TRUE	up.late	17799	19905	24632	18159	28243	23324	25398	33532	34008	-0.913731	-0.299375	1.21311	14.3198	14.4959	14.9294
chr3	87227271	87255556	28286	+	CHMP2B	protein_coding	ENSG00000083937	ENSG00000083937.10	3241.22	0.150299	-0.908176	1.08262	0.276001	1.88257e-14	7.44791e-20	FALSE	TRUE	TRUE	up.late	2990	3717	4357	1433	2512	2074	3537	4230	4513	0.491871	-1.30557	0.8137	11.9034	11.013	12.0629
chr1	40344850	40423326	78477	+	SMAP2	protein_coding	ENSG00000084070	ENSG00000084070.12	1108.24	-0.220303	0.199045	-0.432306	0.188248	0.22171	0.00422251	FALSE	FALSE	TRUE	down.late	877	1143	1277	1235	1527	1215	767	902	1101	0.0127416	0.998351	-1.01109	10.2861	10.5068	10.0567
chr1	39692182	39763914	71733	+	PPIE	protein_coding	ENSG00000084072	ENSG00000084072.17	1553.13	0.452801	0.18901	0.223598	0.000860276	0.196551	0.120438	TRUE	FALSE	FALSE	up.early	1096	1498	1353	1511	1907	1457	1742	1810	1613	-1.02171	-0.0520736	1.07379	10.5078	10.7111	10.9472
chr2	96184859	96208825	23967	-	STARD7	protein_coding	ENSG00000084090	ENSG00000084090.13	7162.28	-0.418526	0.140182	-0.568672	0.00539161	0.408447	8.43713e-05	TRUE	FALSE	TRUE	down.late	6331	8270	8226	7769	10205	7621	4409	5356	6729	0.3149	0.85969	-1.17459	12.9065	13.0748	12.4464
chr12	95972662	95996365	23704	-	HAL	protein_coding	ENSG00000084110	ENSG00000084110.11	8.38329	-1.08259	0.294897	-2.40954	0.0508049	0.390272	0.00375921	FALSE	FALSE	TRUE	down.late	9	10	8	12	8	11	0	1	5	0.158352	0.878223	-1.03658	6.73006	6.90834	6.43414
chr12	108778191	108857590	79400	-	SSH1	protein_coding	ENSG00000084112	ENSG00000084112.15	3315.32	1.55182	0.922542	0.554503	6.98058e-29	4.17284e-11	5.73879e-05	TRUE	TRUE	TRUE	up.early	1456	1736	1945	3168	4109	3435	3921	5412	4299	-1.20899	0.156679	1.05231	10.8344	11.7362	12.3277
chr11	130068147	130144811	76665	+	APLP2	protein_coding	ENSG00000084234	ENSG00000084234.18	20663.6	1.0461	0.324282	0.651217	6.44705e-14	0.0230347	2.90793e-06	TRUE	FALSE	TRUE	up.late	10807	14863	17002	17114	20156	17805	27911	37018	24566	-0.992182	-0.21797	1.21015	13.7883	14.1642	14.8577
chr1	31652263	31704319	52057	-	COL16A1	protein_coding	ENSG00000084636	ENSG00000084636.18	1306.84	5.08464	0.705247	4.26275	1.57464e-132	0.000692295	3.73037e-105	TRUE	TRUE	TRUE	up.late	67	102	91	276	187	180	3773	4386	3502	-0.779344	-0.543138	1.32248	7.87766	8.32719	11.8776
chr1	32179675	32198285	18611	+	TXLNA	protein_coding	ENSG00000084652	ENSG00000084652.16	4894.72	0.18133	0.52768	-0.327268	0.236496	9.10068e-05	0.0182809	FALSE	TRUE	FALSE	up.early	3561	4193	4207	5805	6920	5735	3754	4940	5176	-0.934162	1.15516	-0.220994	12.0271	12.5913	12.2197
chr2	27042364	27070622	28259	+	AGBL5	protein_coding	ENSG00000084693	ENSG00000084693.16	1518.59	1.11105	0.275673	0.757081	1.24536e-12	0.0861184	1.15407e-06	TRUE	FALSE	TRUE	up.late	721	1120	1220	1151	1454	1320	2225	2651	1889	-0.927785	-0.305812	1.2336	10.1778	10.481	11.2312
chr2	25926598	25982749	56152	-	KIF3C	protein_coding	ENSG00000084731	ENSG00000084731.15	592.509	1.08659	0.729781	0.27705	1.08294e-10	1.6245e-05	0.106422	TRUE	TRUE	FALSE	up.early	310	354	443	546	672	597	705	887	812	-1.22001	0.271389	0.948624	8.96732	9.5923	9.87609
chr2	26034084	26137454	103371	+	RAB10	protein_coding	ENSG00000084733	ENSG00000084733.11	8223.79	0.463403	0.097439	0.333712	0.000473105	0.555063	0.0124204	TRUE	FALSE	FALSE	up.late	5653	8186	8822	6626	8589	7347	8892	10248	9819	-0.831236	-0.35037	1.18161	12.8126	12.9292	13.3006
chr2	26970637	27027219	56583	+	MAPRE3	protein_coding	ENSG00000084764	ENSG00000084764.12	643.256	1.69233	-0.485076	2.26529	2.05067e-24	0.00397926	2.50222e-41	TRUE	TRUE	TRUE	up.late	322	379	480	220	285	283	1250	1457	1113	-0.406211	-0.885939	1.29215	9.05213	8.64933	10.4781
chr2	27217369	27243943	26575	+	CAD	protein_coding	ENSG00000084774	ENSG00000084774.14	8739.44	0.809357	0.505547	0.223665	2.78929e-06	0.00309698	0.221926	TRUE	TRUE	FALSE	up.early	5140	6612	6074	8938	11732	7785	8492	11084	13338	-1.14365	0.249019	0.89463	12.5918	13.1693	13.437
chr11	44564427	44620358	55932	+	CD82	protein_coding	ENSG00000085117	ENSG00000085117.12	2269.93	1.23055	0.392442	0.69619	3.96413e-10	0.0380663	0.000280565	TRUE	FALSE	TRUE	up.late	1019	1578	1504	2455	2039	1755	3503	4083	2550	-0.963583	-0.196562	1.16014	10.5936	11.0291	11.7994
chr3	169773396	169789716	16321	+	MYNN	protein_coding	ENSG00000085274	ENSG00000085274.16	641.791	0.608306	0.172474	0.352767	0.00139904	0.395557	0.0589407	TRUE	FALSE	FALSE	up.late	430	501	607	433	688	703	807	821	792	-0.828738	-0.244319	1.07306	9.3533	9.52589	9.91492
chr6	105273218	105454062	180845	-	PREP	protein_coding	ENSG00000085377	ENSG00000085377.15	3669.96	0.293646	-0.081787	0.37329	0.0307987	0.630519	0.00417384	FALSE	FALSE	TRUE	up.late	3051	3784	3880	2829	4127	3154	3727	4648	3870	-0.346376	-0.814475	1.16085	11.8172	11.7216	12.125
chr2	223855716	223945357	89642	-	WDFY1	protein_coding	ENSG00000085449	ENSG00000085449.15	2083.95	0.415119	0.145855	0.225408	0.00866721	0.407323	0.170427	TRUE	FALSE	FALSE	up.late	1403	1741	2094	1589	2478	2071	2456	3043	2120	-0.863469	-0.140749	1.00422	10.9156	11.0794	11.3389
chr1	111414319	111427735	13417	-	OVGP1	protein_coding	ENSG00000085465	ENSG00000085465.13	39.7423	1.42684	0.285093	0.755444	0.000180887	0.324535	0.0197714	TRUE	FALSE	FALSE	up.late	17	26	22	38	31	29	59	75	46	-0.867885	-0.274977	1.14286	7.01857	7.17957	7.56455
chr1	108134043	108200849	66807	-	SLC25A24	protein_coding	ENSG00000085491	ENSG00000085491.17	2909.24	-0.643007	-0.516692	-0.079464	0.00024225	0.00270274	0.725437	TRUE	TRUE	FALSE	down.early	3230	3900	4337	1844	3343	2669	2133	2338	2508	1.16261	-0.474312	-0.688299	11.964	11.3667	11.2886
chr1	159927039	159945613	18575	-	IGSF9	protein_coding	ENSG00000085552	ENSG00000085552.17	496.105	0.147783	-0.57462	0.758707	0.478733	0.00134435	2.5309e-05	FALSE	TRUE	TRUE	up.late	445	589	577	317	483	258	511	643	668	0.387203	-1.20512	0.817922	9.42205	8.90147	9.56287
chr16	3129777	3142804	13028	+	ZNF213	protein_coding	ENSG00000085644	ENSG00000085644.14	697.746	-1.0274	-0.338085	-0.575653	9.92923e-09	0.0543254	0.00110221	TRUE	FALSE	TRUE	down.early	725	1097	1012	755	715	593	417	521	433	1.01967	0.120078	-1.13974	10.0956	9.72174	9.19813
chr8	86514435	86561498	47064	+	CPNE3	protein_coding	ENSG00000085719	ENSG00000085719.13	6217.98	-0.964194	-0.785432	-0.153672	6.45774e-17	1.41117e-11	0.261899	TRUE	TRUE	FALSE	down.early	7856	8867	11480	3503	6794	5628	3863	4718	4601	1.29715	-0.461136	-0.836013	13.159	12.362	12.1921
chr16	15060033	15094311	34279	-	RRN3	protein_coding	ENSG00000085721	ENSG00000085721.13	2794.48	-0.656821	-0.661438	0.0128208	3.18259e-05	2.56921e-05	0.963369	TRUE	TRUE	FALSE	down.early	3360	3737	4209	1891	2928	2280	2026	2509	2264	1.23111	-0.653276	-0.577832	11.9392	11.2393	11.2673
chr2	55236595	55269347	32753	-	MTIF2	protein_coding	ENSG00000085760	ENSG00000085760.15	1812.4	0.743041	-0.112044	0.871597	2.01077e-11	0.424712	3.59822e-15	TRUE	FALSE	TRUE	up.late	1251	1579	1626	1243	1626	1322	2536	2758	2445	-0.505036	-0.806275	1.31131	10.6918	10.5733	11.4062
chr8	38225218	38275558	50341	+	DDHD2	protein_coding	ENSG00000085788	ENSG00000085788.14	2407.13	-1.05032	-1.04552	-0.00590195	1.32278e-20	2.89985e-20	0.982134	TRUE	TRUE	FALSE	down.early	3025	3697	4349	1629	2033	1876	1522	1905	1704	1.3241	-0.657351	-0.666753	11.9128	10.9017	10.8969
chr1	51287258	51345116	57859	-	TTC39A	protein_coding	ENSG00000085831	ENSG00000085831.15	26.4466	-2.13126	-2.02038	-0.0495651	2.13371e-05	1.37207e-05	0.896972	TRUE	TRUE	FALSE	down.early	49	68	86	9	16	18	6	14	5	1.26267	-0.608816	-0.653857	7.46533	6.83663	6.8215
chr1	51354263	51519266	165004	-	EPS15	protein_coding	ENSG00000085832	ENSG00000085832.17	3009.6	-0.519886	-0.157628	-0.309968	0.000702913	0.354845	0.0464007	TRUE	FALSE	FALSE	down.early	2839	3617	4299	2384	3717	3184	2257	2740	2258	0.885238	0.21205	-1.09729	11.8431	11.6622	11.3102
chr4	139665768	139740745	74978	+	MGST2	protein_coding	ENSG00000085871	ENSG00000085871.9	838.147	-0.591867	-0.449308	-0.0857175	0.00158941	0.0136224	0.715867	TRUE	FALSE	FALSE	down.early	994	1019	1242	565	831	867	677	722	628	1.12157	-0.427658	-0.693916	10.2664	9.78397	9.70106
chr19	16517894	16542437	24544	-	CHERP	protein_coding	ENSG00000085872	ENSG00000085872.15	2259.63	0.469062	0.258836	0.165408	0.00107411	0.0761493	0.302591	TRUE	FALSE	FALSE	up.early	1683	1920	2071	1972	2996	2345	2086	2643	2670	-1.08356	0.1445	0.939062	10.9688	11.2534	11.4375
chr1	46188682	46220305	31624	-	POMGNT1	protein_coding	ENSG00000085998	ENSG00000085998.14	3235.66	0.473486	0.146939	0.273531	0.00410726	0.423639	0.10243	TRUE	FALSE	FALSE	up.late	2088	2980	2975	3027	3606	2794	3910	4603	3290	-0.846992	-0.178465	1.02546	11.4804	11.6575	11.9766
chr9	33025273	33039907	14635	+	DNAJA1	protein_coding	ENSG00000086061	ENSG00000086061.16	7437.14	0.301842	0.641717	-0.301142	0.0792141	7.50968e-05	0.0701544	FALSE	TRUE	FALSE	up.early	5138	6098	5640	8482	12571	7966	6486	6765	8375	-1.00942	1.03602	-0.0266088	12.5112	13.2069	12.8455
chr9	33104082	33167356	63275	-	B4GALT1	protein_coding	ENSG00000086062	ENSG00000086062.13	15195.6	-0.152934	0.229572	-0.392792	0.289762	0.0823572	0.00181026	FALSE	FALSE	TRUE	down.late	11009	15784	17755	17369	19286	17449	11549	15325	12408	-0.154831	1.10806	-0.953234	13.8599	14.1253	13.692
chr9	33264879	33282070	17192	+	CHMP5	protein_coding	ENSG00000086065	ENSG00000086065.14	2764.83	0.970259	0.179592	0.712364	5.60774e-08	0.349397	5.78829e-05	TRUE	FALSE	TRUE	up.late	1481	2133	2291	2319	2596	2137	4682	4349	2972	-0.83668	-0.3604	1.19708	11.0416	11.2663	12.0009
chr9	33290512	33371157	80646	+	NFX1	protein_coding	ENSG00000086102	ENSG00000086102.19	2690.75	0.487956	0.551024	-0.0646063	0.000222405	2.16726e-05	0.722745	TRUE	TRUE	FALSE	up.early	1603	2022	2242	2554	3919	3196	2498	3424	3159	-1.25039	0.752464	0.497923	11.1018	11.6604	11.5894
chr7	6022247	6059175	36929	-	EIF2AK1	protein_coding	ENSG00000086232	ENSG00000086232.13	3875.97	-0.70313	-0.514713	-0.144744	6.33693e-07	0.000257675	0.384829	TRUE	TRUE	FALSE	down.early	4391	4933	6121	2622	4648	3788	2515	3363	2956	1.22669	-0.379209	-0.847484	12.3625	11.8078	11.6461
chr7	37683843	37951936	268094	+	EPDR1	protein_coding	ENSG00000086289	ENSG00000086289.12	1311.96	-0.835728	-0.0194813	-0.799319	3.31377e-06	0.941308	9.06901e-06	TRUE	FALSE	TRUE	down.late	1195	1762	1763	1282	1871	1353	697	848	1060	0.640593	0.587288	-1.22788	10.7357	10.7129	9.93522
chr10	13317428	13348298	30871	-	SEPHS1	protein_coding	ENSG00000086475	ENSG00000086475.15	2337.4	-0.285019	0.194569	-0.499106	0.149036	0.317709	0.00595267	FALSE	FALSE	TRUE	down.late	1965	2358	2438	2237	3900	2780	1610	1944	1971	0.0750347	0.851695	-0.92673	11.2757	11.5131	10.9695
chr19	41750977	41772211	21235	+	CEACAM6	protein_coding	ENSG00000086548	ENSG00000086548.9	390.794	4.9685	0.214431	4.58438	1.84199e-61	0.417635	1.08277e-55	TRUE	FALSE	TRUE	up.late	43	21	35	35	43	57	914	1358	1007	-0.706247	-0.618516	1.32476	7.20946	7.34182	10.2737
chr5	151504093	151568944	64852	-	FAT2	protein_coding	ENSG00000086570	ENSG00000086570.12	3184.19	8.4005	7.13094	1.23176	2.48985e-246	2.58407e-177	2.2737e-13	TRUE	TRUE	TRUE	up.early	20	17	21	2496	2911	3067	5397	7493	7301	-1.30402	0.418557	0.885459	6.99868	11.5185	12.7436
chr12	123584533	123598582	14050	+	TMED2	protein_coding	ENSG00000086598	ENSG00000086598.11	6843.29	-0.661647	-0.200686	-0.420452	1.47702e-08	0.116182	0.000374406	TRUE	FALSE	TRUE	down.early	7768	8066	9902	4645	9891	7816	4141	5625	5275	0.97786	0.242522	-1.22038	13.0444	12.8189	12.3704
chr1	236215101	236281958	66858	-	ERO1B	protein_coding	ENSG00000086619	ENSG00000086619.14	87.0241	4.20871	2.82304	1.24317	1.12069e-31	1.57132e-14	1.61953e-06	TRUE	TRUE	TRUE	up.early	9	7	14	61	81	79	153	218	137	-1.18374	0.0736712	1.11007	6.77919	7.61589	8.30552
chr16	82035004	82098534	63531	+	HSD17B2	protein_coding	ENSG00000086696	ENSG00000086696.11	23.4192	-3.10369	-0.120354	-2.70451	5.58847e-06	0.716635	6.26305e-05	TRUE	FALSE	TRUE	down.late	36	30	56	19	49	33	3	5	1	0.759991	0.462798	-1.22279	7.24996	7.14858	6.57361
chrX	16786432	16844519	58088	+	TXLNG	protein_coding	ENSG00000086712	ENSG00000086712.13	1999.29	0.458526	0.223052	0.178433	0.00768308	0.204219	0.337489	TRUE	FALSE	FALSE	up.early	1459	1657	1741	1593	2604	2027	1926	2365	2730	-0.942269	0.0549212	0.887348	10.8097	11.0651	11.2783
chr7	74199652	74229834	30183	+	LAT2	protein_coding	ENSG00000086730	ENSG00000086730.17	55.5343	2.5342	1.29648	0.76432	6.32774e-10	0.000816173	0.0141368	TRUE	TRUE	FALSE	up.early	11	16	19	27	60	46	101	147	107	-1.08164	-0.0250457	1.10669	6.93497	7.37661	7.84965
chr19	48872421	48876058	3638	+	PPP1R15A	protein_coding	ENSG00000087074	ENSG00000087074.8	1398.31	0.989049	-0.0169961	1.02178	4.91284e-09	0.947099	2.79135e-09	TRUE	FALSE	TRUE	up.late	894	1093	1083	1047	1209	880	2096	2668	1652	-0.61254	-0.655349	1.26789	10.2092	10.1879	11.1473
chr19	48965309	48966879	1571	+	FTL	protein_coding	ENSG00000087086	ENSG00000087086.15	15486.5	0.880262	1.27648	-0.330518	3.92059e-10	2.18114e-19	0.0226772	TRUE	TRUE	FALSE	up.early	6375	9823	9950	22365	21396	21244	15973	18565	14468	-1.24908	0.946109	0.302967	13.1006	14.389	14.0116
chr7	100875103	100888664	13562	+	SRRT	protein_coding	ENSG00000087087	ENSG00000087087.20	3411.52	-0.335466	0.149715	-0.496894	0.081623	0.460581	0.00586308	FALSE	FALSE	TRUE	down.late	2798	3492	3495	3988	5394	3819	2102	2356	3654	0.215952	0.810247	-1.0262	11.8396	12.0329	11.4357
chr17	28553383	28571794	18412	-	PIGS	protein_coding	ENSG00000087111	ENSG00000087111.21	2143.16	-0.164661	0.157869	-0.32771	0.232139	0.250264	0.00802742	FALSE	FALSE	TRUE	down.late	1622	2330	2566	2349	2752	2254	1652	1978	1948	-0.0166958	1.05488	-1.03819	11.1541	11.3294	10.9871
chr4	68447463	68497604	50142	+	TMPRSS11E	protein_coding	ENSG00000087128	ENSG00000087128.10	135.952	-3.75729	-3.47946	-0.125777	4.01473e-24	1.14288e-21	0.687411	TRUE	TRUE	FALSE	down.early	372	321	334	27	49	18	23	15	36	1.30704	-0.614204	-0.692832	8.93808	7.15	7.07682
chr5	176905005	177022633	117629	-	UIMC1	protein_coding	ENSG00000087206	ENSG00000087206.17	2028.94	0.347167	0.233822	0.0894155	0.00495778	0.0641584	0.566718	TRUE	FALSE	FALSE	up.early	1423	1843	1789	2021	2467	1872	2215	2682	2106	-1.18011	0.308558	0.871552	10.8853	11.1345	11.2288
chr16	55389700	55506691	116992	+	MMP2	protein_coding	ENSG00000087245	ENSG00000087245.13	1214.19	-2.64625	1.70164	-4.41767	1.48813e-30	1.02452e-14	1.24743e-83	TRUE	TRUE	TRUE	down.late	714	801	865	2774	2297	2751	94	156	139	0.0733752	1.106	-1.17937	9.89497	11.461	7.99516
chr16	55509072	55586666	77595	+	LPCAT2	protein_coding	ENSG00000087253	ENSG00000087253.13	1771.13	-0.3287	-1.37888	0.969584	0.095584	1.25383e-12	5.24592e-07	FALSE	TRUE	TRUE	down.early	2446	2467	2864	716	1397	955	1436	1927	1677	0.904409	-1.22724	0.32283	11.3643	10.0413	11.0034
chr16	56191390	56357444	166055	+	GNAO1	protein_coding	ENSG00000087258	ENSG00000087258.16	123.563	0.384463	0.5553	-0.151537	0.0877863	0.00872179	0.511629	FALSE	TRUE	FALSE	up.early	48	112	98	155	212	153	109	143	132	-1.14574	0.913487	0.232257	7.78659	8.14609	8.02716
chr16	56451521	56479104	27584	+	OGFOD1	protein_coding	ENSG00000087263	ENSG00000087263.17	2299.17	-0.613131	-0.219525	-0.334498	2.73208e-05	0.154783	0.0244336	TRUE	FALSE	FALSE	down.early	2558	2736	3025	2092	2909	2275	1447	1754	2006	0.98947	0.132229	-1.1217	11.526	11.2731	10.9031
chr4	2843857	2930076	86220	+	ADD1	protein_coding	ENSG00000087274	ENSG00000087274.17	5752.74	-0.590176	0.0420036	-0.625194	2.26755e-05	0.832717	5.06079e-06	TRUE	FALSE	TRUE	down.late	5304	6779	7217	6669	8137	6834	3377	4235	4016	0.548966	0.704572	-1.25354	12.6814	12.7343	12.0684
chr14	52004803	52069228	64426	-	NID2	protein_coding	ENSG00000087303	ENSG00000087303.18	22.9725	-2.84033	2.92447	-6.44911	0.00413112	6.00544e-07	7.01675e-08	TRUE	TRUE	TRUE	down.late	11	5	6	55	59	42	0	0	1	-0.28066	1.23993	-0.959269	6.69984	7.51735	6.335
chr2	69829660	69881384	51725	+	GMCL1	protein_coding	ENSG00000087338	ENSG00000087338.5	680.459	0.535823	-0.0711057	0.604112	0.00558571	0.766547	0.00127091	TRUE	FALSE	TRUE	up.late	487	591	694	423	744	543	796	945	901	-0.422273	-0.723852	1.14613	9.52331	9.42443	10.0376
chr12	27780048	27803040	22993	+	KLHL42	protein_coding	ENSG00000087448	ENSG00000087448.11	2033.41	-0.46763	0.0500665	-0.50858	0.00118122	0.801273	0.000290078	TRUE	FALSE	TRUE	down.late	2013	2460	2526	2164	2954	2235	1120	1480	1710	0.504263	0.717019	-1.22128	11.2098	11.2679	10.7391
chr12	27958084	27972733	14650	-	PTHLH	protein_coding	ENSG00000087494	ENSG00000087494.16	577.339	3.30554	1.32992	1.85019	4.73781e-40	1.23149e-07	2.79791e-14	TRUE	TRUE	TRUE	up.late	128	126	112	227	532	289	1135	1283	1444	-1.01118	-0.217172	1.22835	8.0052	8.87841	10.4681
chr20	59577509	59847711	270203	+	PHACTR3	protein_coding	ENSG00000087495	ENSG00000087495.17	188.756	-5.52952	-1.49897	-3.93738	2.76816e-47	6.98531e-09	7.2035e-24	TRUE	TRUE	TRUE	down.early	396	410	488	88	211	137	6	11	8	1.1011	0.0809924	-1.18209	9.13466	8.07303	6.75854
chr20	56629306	56639283	9978	+	TFAP2C	protein_coding	ENSG00000087510	ENSG00000087510.7	1332.88	-0.289184	-0.773297	0.436559	0.0692514	2.73036e-07	0.00364203	FALSE	TRUE	TRUE	down.early	1489	1732	1817	831	1215	916	1288	1586	1138	1.01211	-1.15186	0.139749	10.8478	10.1045	10.5481
chr20	56369389	56392337	22949	-	AURKA	protein_coding	ENSG00000087586	ENSG00000087586.18	4182.13	0.651097	0.0944452	0.486465	0.000977439	0.685857	0.0109391	TRUE	FALSE	FALSE	up.late	2943	3445	3680	2550	5590	3301	4816	6280	5288	-0.664658	-0.440215	1.10487	11.7656	11.8558	12.4772
chrX	15384799	15493564	108766	-	PIR	protein_coding	ENSG00000087842	ENSG00000087842.11	1764.24	3.35237	1.89763	1.38458	3.36225e-59	1.03535e-19	1.64796e-11	TRUE	TRUE	TRUE	up.early	265	404	378	1485	1333	1252	3996	4187	2550	-1.17282	0.0719936	1.10083	8.93848	10.5308	11.8469
chr11	77821109	77918432	97324	+	AAMDC	protein_coding	ENSG00000087884	ENSG00000087884.14	103.536	-0.203312	0.448209	-0.743731	0.490137	0.072883	0.00593664	FALSE	FALSE	TRUE	down.late	67	119	86	195	151	101	81	87	56	-0.255133	1.03269	-0.777558	7.7729	8.10709	7.63734
chr17	62423875	62453385	29511	+	METTL2A	protein_coding	ENSG00000087995	ENSG00000087995.16	1411.97	0.6544	-0.0299349	0.677609	3.16488e-06	0.885539	1.02503e-06	TRUE	FALSE	TRUE	up.late	975	1329	1214	1443	1537	1003	1611	1869	1599	-0.581426	-0.692721	1.27415	10.3761	10.3382	11.0071
chr19	48552172	48599425	47254	+	SULT2B1	protein_coding	ENSG00000088002	ENSG00000088002.12	126.578	0.195887	-2.81061	3.08729	0.459856	1.16831e-19	1.50862e-23	FALSE	TRUE	TRUE	up.late	163	160	153	25	19	23	212	206	160	0.525141	-1.29931	0.774167	8.21104	7.04087	8.37076
chr1	23428563	23484568	56006	-	ASAP3	protein_coding	ENSG00000088280	ENSG00000088280.19	1203.22	-2.65422	-0.182702	-2.38553	1.46571e-34	0.389186	3.49109e-28	TRUE	FALSE	TRUE	down.late	1226	2285	2409	1693	1607	1707	224	296	199	0.758633	0.542701	-1.30133	10.9209	10.6899	8.71716
chr20	35558737	35607562	48826	-	FER1L4	transcribed_unitary_pseudogene	ENSG00000088340	ENSG00000088340.17	886.533	2.17723	-0.715218	3.17435	1.44584e-11	0.0113435	2.13992e-22	TRUE	FALSE	TRUE	up.late	200	509	524	260	160	232	1907	2232	1881	-0.348288	-0.901023	1.24931	9.10296	8.41821	11.0821
chr20	36091504	36232799	141296	+	EPB41L1	protein_coding	ENSG00000088367	ENSG00000088367.23	3169.03	-1.71281	-1.98475	0.229414	3.31309e-37	2.57185e-49	0.119254	TRUE	TRUE	FALSE	down.early	5159	6440	7758	1554	1671	1771	1432	1897	1577	1.31543	-0.796443	-0.518985	12.617	10.7112	10.9616
chr13	110878540	110915069	36530	-	ANKRD10	protein_coding	ENSG00000088448	ENSG00000088448.14	1449.87	0.548862	0.229931	0.275533	1.47193e-05	0.0841038	0.0360367	TRUE	FALSE	FALSE	up.early	841	1298	1395	1612	1855	1756	1428	1587	1366	-1.06933	-0.0606623	1.13	10.372	10.6133	10.898
chr3	50674927	51384198	709272	+	DOCK3	protein_coding	ENSG00000088538	ENSG00000088538.13	111.695	1.30684	-0.245809	1.78525	6.94683e-06	0.341272	7.36165e-09	TRUE	FALSE	TRUE	up.late	78	68	72	60	50	58	142	205	266	-0.426902	-0.804211	1.23111	7.63868	7.46453	8.40397
chr3	50558025	50571027	13003	-	C3orf18	protein_coding	ENSG00000088543	ENSG00000088543.15	98.6575	-4.15813	0.109482	-4.35819	2.36387e-21	0.709367	2.37408e-23	TRUE	FALSE	TRUE	down.late	112	104	178	149	141	122	5	17	3	0.572149	0.730378	-1.30253	8.05492	8.17026	6.68833
chr16	57447425	57461270	13846	+	COQ9	protein_coding	ENSG00000088682	ENSG00000088682.14	2160.15	-0.72371	-0.588067	-0.0966103	3.85198e-06	0.00016394	0.6278	TRUE	TRUE	FALSE	down.early	2234	3311	3260	1893	2135	1743	1568	1770	1604	1.22593	-0.464348	-0.761581	11.5802	10.9637	10.8553
chr3	12733528	12769457	35930	-	TMEM40	protein_coding	ENSG00000088726	ENSG00000088726.16	588.281	2.15408	-0.115509	2.31981	5.99845e-25	0.620807	1.4192e-28	TRUE	FALSE	TRUE	up.late	198	315	331	264	237	239	1244	1386	980	-0.591699	-0.71852	1.31022	8.68948	8.57267	10.4412
chr14	103733195	103847575	114381	-	PPP1R13B	protein_coding	ENSG00000088808	ENSG00000088808.18	708.391	-0.452056	-0.729618	0.210594	0.0546998	0.00164371	0.369252	FALSE	TRUE	FALSE	down.early	834	979	1107	483	728	548	453	586	615	1.00176	-0.856745	-0.145017	10.1019	9.3432	9.63376
chr20	3471018	3651118	180101	+	ATRN	protein_coding	ENSG00000088812	ENSG00000088812.18	3667.53	0.410911	-0.0688257	0.474618	0.00346652	0.711457	0.000492512	TRUE	FALSE	TRUE	up.late	2688	3226	4273	2765	3969	3313	3637	4903	4327	-0.455056	-0.750154	1.20521	11.7602	11.6834	12.1925
chr20	4120980	4187747	66768	+	SMOX	protein_coding	ENSG00000088826	ENSG00000088826.18	1358.83	1.27455	1.5186	-0.136986	5.02881e-07	5.56001e-09	0.595853	TRUE	TRUE	FALSE	up.early	378	707	792	1968	1950	1612	1587	2005	1180	-1.20924	0.751221	0.458017	9.53767	10.9599	10.7472
chr20	1442162	1473842	31681	-	NSFL1C	protein_coding	ENSG00000088833	ENSG00000088833.17	3917.36	0.0513824	-0.613903	0.66793	0.751326	1.75891e-07	9.78176e-09	FALSE	TRUE	TRUE	up.late	3658	4688	4502	2712	3449	2729	4087	4929	4386	0.563405	-1.2977	0.734296	12.1473	11.5244	12.2045
chr20	3227417	3239559	12143	-	SLC4A11	protein_coding	ENSG00000088836	ENSG00000088836.14	867.807	0.388276	-2.89711	3.34212	0.0242646	1.47301e-58	5.17332e-78	FALSE	TRUE	TRUE	up.late	839	1088	1109	145	179	142	1044	1466	1466	0.488925	-1.31215	0.823224	10.2181	8.08727	10.6136
chr20	21125983	21246622	120640	+	KIZ	protein_coding	ENSG00000088970	ENSG00000088970.16	350.343	1.68694	0.805723	0.680831	2.08967e-13	0.000300064	0.00138981	TRUE	TRUE	TRUE	up.early	134	165	233	237	381	361	549	611	438	-1.09322	-0.00862077	1.10184	8.23929	8.84278	9.46066
chr12	120469850	120498493	28644	+	DYNLL1	protein_coding	ENSG00000088986	ENSG00000088986.11	5906.95	-0.572879	-0.114505	-0.374597	0.00812356	0.633567	0.0709079	TRUE	FALSE	FALSE	down.late	6468	6677	7730	4072	8644	6622	3816	4223	5116	0.722876	0.210061	-0.932936	12.8051	12.6016	12.1481
chr20	17941597	17968980	27384	-	SNX5	protein_coding	ENSG00000089006	ENSG00000089006.17	6509.82	0.607906	-0.129824	0.754542	6.28771e-06	0.416762	1.42031e-08	TRUE	FALSE	TRUE	up.late	5104	5997	6305	4448	6268	5109	7822	8769	8302	-0.432598	-0.826762	1.25936	12.4945	12.3461	13.1315
chr20	1629152	1657779	28628	-	SIRPG	protein_coding	ENSG00000089012	ENSG00000089012.14	3.47773	-3.65396	-1.60351	-0.133181	0.00309905	0.0279897	0.740676	TRUE	FALSE	FALSE	down.early	5	11	20	0	0	1	0	0	0	1.21813	-0.46306	-0.755071	6.77859	6.35686	6.28361
chr20	13714322	13784886	70565	-	ESF1	protein_coding	ENSG00000089048	ENSG00000089048.14	907.372	0.427772	-0.23091	0.707351	0.0284272	0.234891	0.00018293	FALSE	FALSE	TRUE	up.late	774	817	941	528	931	715	1197	931	1294	-0.144926	-0.905736	1.05066	9.95674	9.69237	10.3722
chr20	18486540	18497225	10686	-	RBBP9	protein_coding	ENSG00000089050	ENSG00000089050.16	937.728	0.763128	0.23635	0.471413	7.11075e-09	0.0931443	0.000345155	TRUE	FALSE	TRUE	up.late	553	807	802	908	893	830	1116	1370	1177	-0.984755	-0.239495	1.22425	9.74629	9.9808	10.4414
chr20	4852356	5010293	157938	-	SLC23A2	protein_coding	ENSG00000089057	ENSG00000089057.15	1648.01	0.619348	0.278947	0.260049	0.000402161	0.11177	0.147938	TRUE	FALSE	FALSE	up.early	1067	1269	1383	1390	2085	1596	1555	2172	2442	-0.995312	0.0288339	0.966479	10.4733	10.7923	11.0844
chr12	113298759	113359493	60735	-	SLC8B1	protein_coding	ENSG00000089060	ENSG00000089060.11	1892.3	-0.448496	-0.589316	0.123055	0.0519155	0.00800708	0.627756	FALSE	TRUE	FALSE	down.early	1916	2822	2539	1673	1581	1162	1565	2032	1571	0.992578	-0.749434	-0.243144	11.3642	10.6281	10.8421
chr20	5068232	5113103	44872	-	TMEM230	protein_coding	ENSG00000089063	ENSG00000089063.15	2303.43	0.458875	-0.257372	0.769855	0.0106854	0.150556	1.18107e-05	FALSE	FALSE	TRUE	up.late	1646	2120	2679	1298	2066	1921	2701	3471	2892	-0.148624	-0.95739	1.10601	11.1567	10.837	11.6526
chr20	18383367	18467281	83915	-	DZANK1	protein_coding	ENSG00000089091	ENSG00000089091.16	98.0526	-1.07733	-0.292885	-0.552861	0.000147483	0.229282	0.0321837	TRUE	FALSE	FALSE	down.early	93	137	199	107	127	101	41	44	67	0.925624	0.143624	-1.06925	8.06069	7.83562	7.48653
chr20	13389392	13638932	249541	-	TASP1	protein_coding	ENSG00000089123	ENSG00000089123.16	512.525	-0.10919	-0.608827	0.471665	0.594409	0.000284018	0.0046137	FALSE	TRUE	TRUE	down.early	475	658	648	380	415	377	477	578	590	0.787538	-1.19801	0.410469	9.55425	9.02033	9.45285
chr12	112906783	112933222	26440	+	OAS1	protein_coding	ENSG00000089127	ENSG00000089127.14	618.443	1.00188	-0.560705	1.7009	6.75948e-08	0.00258392	7.43492e-19	TRUE	TRUE	TRUE	up.late	386	501	580	231	406	351	880	1019	1210	-0.208234	-1.00344	1.21167	9.3235	8.82428	10.2149
chr12	120127202	120194715	67514	-	GCN1	protein_coding	ENSG00000089154	ENSG00000089154.11	18642.1	0.541212	0.250096	0.225464	0.00112391	0.138772	0.196933	TRUE	FALSE	FALSE	up.early	11339	17180	16639	20829	21084	16301	18908	23425	22084	-0.976874	0.00573303	0.971141	13.8717	14.1715	14.4661
chr12	120210439	120265771	55333	-	PXN	protein_coding	ENSG00000089159	ENSG00000089159.16	14369.2	0.542762	0.06604	0.456169	4.65389e-07	0.659908	2.13968e-05	TRUE	FALSE	TRUE	up.late	10094	14138	13452	13432	16339	12509	14208	18091	16636	-0.783452	-0.506092	1.28954	13.5921	13.6668	14.1503
chr20	16272104	16573448	301345	-	KIF16B	protein_coding	ENSG00000089177	ENSG00000089177.19	953.743	0.6515	-0.0626116	0.716458	5.23744e-07	0.73146	2.5309e-08	TRUE	FALSE	TRUE	up.late	633	824	968	689	934	775	1170	1356	1237	-0.552428	-0.747184	1.29961	9.89451	9.83107	10.4978
chr12	112013348	112023449	10102	+	ERP29	protein_coding	ENSG00000089248	ENSG00000089248.7	2677.44	-0.498224	-0.280897	-0.183302	1.40081e-05	0.0167078	0.152844	TRUE	FALSE	FALSE	down.early	2451	3658	3598	2644	2929	2317	2083	2445	2152	1.1826	-0.157646	-1.02496	11.716	11.4163	11.2223
chr19	35154730	35169881	15152	+	FXYD5	protein_coding	ENSG00000089327	ENSG00000089327.15	4433.65	-0.961516	-0.635275	-0.212303	8.47004e-06	0.00262139	0.333708	TRUE	TRUE	FALSE	down.early	5857	6216	7093	2328	4980	4333	2890	3451	2838	1.12874	-0.34188	-0.78686	12.6798	11.8927	11.6545
chr19	34677639	34686397	8759	+	ZNF302	protein_coding	ENSG00000089335	ENSG00000089335.21	287.292	-1.05666	-0.101377	-0.910307	7.85133e-08	0.651632	4.66004e-06	TRUE	FALSE	TRUE	down.late	308	371	446	268	409	372	138	139	192	0.765473	0.492464	-1.25794	8.98573	8.88441	8.2348
chr19	34994784	35026471	31688	+	GRAMD1A	protein_coding	ENSG00000089351	ENSG00000089351.14	2872.64	0.890196	0.490867	0.288218	3.46041e-06	0.00892678	0.134123	TRUE	TRUE	FALSE	up.early	1256	2154	2069	3377	3402	2630	4010	4768	2690	-1.08909	0.154187	0.9349	11.0155	11.5708	11.9195
chr19	35115879	35124324	8446	+	FXYD3	protein_coding	ENSG00000089356	ENSG00000089356.18	12042.7	-0.0275857	-1.62229	1.59203	0.920277	2.34914e-14	8.11511e-14	FALSE	TRUE	TRUE	up.late	10794	18550	17373	5165	5217	4664	17385	19470	10411	0.678507	-1.27117	0.592663	13.9532	12.3113	13.8809
chr16	4510669	4538828	28160	-	CDIP1	protein_coding	ENSG00000089486	ENSG00000089486.17	44.1472	-4.76636	-1.61957	-2.61602	2.70949e-13	0.000426442	5.31769e-05	TRUE	TRUE	TRUE	down.early	100	121	145	19	21	23	1	9	1	1.16708	-0.106037	-1.06104	7.85191	7.10442	6.5437
chr16	66566393	66579137	12745	+	CMTM1	protein_coding	ENSG00000089505	ENSG00000089505.18	80.1103	-0.475976	-0.727211	0.187354	0.0479371	0.00249067	0.44927	FALSE	TRUE	FALSE	down.early	83	127	126	55	76	50	66	65	81	1.20121	-0.924041	-0.277167	7.90333	7.49981	7.62263
chr19	19629476	19643657	14182	-	GMIP	protein_coding	ENSG00000089639	ENSG00000089639.11	993.101	0.751661	-0.115107	0.910345	3.71012e-05	0.588916	8.24493e-07	TRUE	FALSE	TRUE	up.late	671	984	871	752	721	623	1448	1720	1189	-0.447101	-0.77188	1.21898	9.90588	9.76575	10.6247
chr14	94026340	94048930	22591	+	OTUB2	protein_coding	ENSG00000089723	ENSG00000089723.10	579.948	1.65792	-0.109853	1.8045	3.61064e-25	0.575953	3.83132e-29	TRUE	FALSE	TRUE	up.late	306	329	401	294	356	280	896	1189	1143	-0.589826	-0.728466	1.31829	8.91118	8.81198	10.2765
chr10	125836337	125896436	60100	-	DHX32	protein_coding	ENSG00000089876	ENSG00000089876.12	2548.65	-0.117533	-0.300971	0.182754	0.350921	0.00524913	0.122009	FALSE	TRUE	FALSE	down.early	2402	2723	3194	1931	2645	2361	2258	2856	2674	1.01421	-1.18162	0.167408	11.5383	11.2252	11.4176
chr14	76151916	76254342	102427	+	GPATCH2L	protein_coding	ENSG00000089916	ENSG00000089916.18	2540.41	0.474497	0.264869	0.152332	0.00561663	0.121311	0.426909	TRUE	FALSE	FALSE	up.early	1560	2243	2570	2387	2932	2562	2598	3133	2871	-0.994025	0.13451	0.859515	11.1062	11.4093	11.604
chr19	40592883	40629818	36936	+	LTBP4	protein_coding	ENSG00000090006	ENSG00000090006.18	1973.34	1.17024	1.30985	-0.075588	2.23007e-06	2.46316e-07	0.790752	TRUE	TRUE	FALSE	up.early	700	1247	1197	3574	2451	2307	2103	2544	1507	-1.19754	0.649943	0.547601	10.109	11.362	11.2926
chr1	27098809	27166981	68173	-	SLC9A1	protein_coding	ENSG00000090020	ENSG00000090020.11	2441	0.556124	0.475372	0.0464905	0.000594868	0.00276972	0.839896	TRUE	TRUE	FALSE	up.early	1328	2071	2182	2567	3313	2673	2077	2897	3068	-1.17533	0.511763	0.66357	10.9488	11.4715	11.5185
chr9	92000087	92115413	115327	-	SPTLC1	protein_coding	ENSG00000090054	ENSG00000090054.15	3576.14	0.179128	0.294478	-0.116841	0.136375	0.00757712	0.377959	FALSE	TRUE	FALSE	up.early	2791	3154	3770	2967	4732	4130	3371	3876	3642	-1.14451	1.0057	0.138814	11.6923	12.0048	11.8788
chr16	30092314	30096915	4602	-	YPEL3	protein_coding	ENSG00000090238	ENSG00000090238.12	167.05	-0.923322	-1.48517	0.272476	0.00271997	1.46891e-05	0.314554	TRUE	TRUE	FALSE	down.early	213	305	379	79	89	81	161	153	69	1.149	-0.781597	-0.367404	8.72474	7.76629	7.97192
chr7	141002610	141015228	12619	-	MRPS33	protein_coding	ENSG00000090263	ENSG00000090263.16	1144.14	-0.639785	-0.736437	0.0848965	3.77042e-06	9.51137e-08	0.644198	TRUE	TRUE	FALSE	down.early	1322	1709	1668	824	1132	847	951	998	887	1.27838	-0.767481	-0.510898	10.7374	10.0401	10.1276
chr7	140690777	140722790	32014	+	NDUFB2	protein_coding	ENSG00000090266	ENSG00000090266.13	3143.58	-0.838779	-0.364186	-0.363692	5.79876e-06	0.0446079	0.0473083	TRUE	FALSE	FALSE	down.early	2980	5324	4444	3716	3083	2471	2330	2263	1948	1.04167	-0.0256974	-1.01598	12.0725	11.621	11.202
chr19	10271093	10286615	15523	+	ICAM1	protein_coding	ENSG00000090339	ENSG00000090339.9	22.2284	-0.485022	-3.31539	1.95108	0.199271	5.81731e-05	0.00501919	FALSE	TRUE	TRUE	down.early	81	43	49	2	3	0	30	20	24	0.903076	-1.07943	0.176355	7.29107	6.54295	7.01683
chr1	20499448	20508151	8704	-	MUL1	protein_coding	ENSG00000090432	ENSG00000090432.7	2217.24	-0.580527	-0.047328	-0.509272	3.7112e-06	0.793969	4.18934e-05	TRUE	FALSE	TRUE	down.late	2028	2792	2810	2497	2615	2350	1453	1691	1820	0.735475	0.541851	-1.27733	11.3966	11.3415	10.8232
chr3	186567403	186585800	18398	+	DNAJB11	protein_coding	ENSG00000090520	ENSG00000090520.11	1532.15	0.578063	0.104145	0.416829	0.000802281	0.61429	0.0136853	TRUE	FALSE	FALSE	up.late	1073	1336	1397	1172	1800	1289	1680	1735	2344	-0.756498	-0.365612	1.12211	10.4587	10.5771	11.0279
chr3	189956728	190122437	165710	-	P3H2	protein_coding	ENSG00000090530	ENSG00000090530.10	2878.96	-1.17437	-0.44197	-0.62374	2.3767e-12	0.00744464	0.000160836	TRUE	TRUE	TRUE	down.early	2990	4804	4551	2846	3254	2222	1741	2042	1586	1.05111	0.0944504	-1.14556	12.0402	11.5328	10.8751
chr19	49474207	49486231	12025	+	FLT3LG	protein_coding	ENSG00000090554	ENSG00000090554.13	98.4188	0.957016	0.199459	0.58159	0.000353569	0.432448	0.0184232	TRUE	FALSE	FALSE	up.late	52	65	78	94	87	68	166	182	106	-0.82612	-0.306234	1.13235	7.57346	7.71583	8.10978
chr16	425649	523011	97363	+	RAB11FIP3	protein_coding	ENSG00000090565	ENSG00000090565.17	1914.23	-0.725793	-0.0582045	-0.630999	7.06878e-06	0.788744	7.76198e-05	TRUE	FALSE	TRUE	down.late	1684	2858	2459	2892	2274	1996	1051	1227	1280	0.71748	0.507944	-1.22542	11.2368	11.1597	10.5215
chr16	1351931	1364113	12183	+	GNPTG	protein_coding	ENSG00000090581	ENSG00000090581.10	971.519	-1.41284	-0.619262	-0.591868	5.19213e-10	0.00389995	0.00554554	TRUE	TRUE	TRUE	down.early	1100	1867	1555	1119	791	798	488	562	495	1.0989	-0.0686525	-1.03025	10.6793	9.97949	9.40309
chr1	39560709	39576790	16082	-	PABPC4	protein_coding	ENSG00000090621	ENSG00000090621.15	13485.5	0.240827	0.328303	-0.089751	0.0181394	0.000726579	0.471834	FALSE	TRUE	FALSE	up.early	9616	13168	12987	14309	16981	13302	12928	15282	13366	-1.25173	0.933919	0.317815	13.5273	13.8775	13.7788
chrX	68829021	68842160	13140	+	EFNB1	protein_coding	ENSG00000090776	ENSG00000090776.6	3851.98	0.646432	0.290097	0.278241	0.000110981	0.0839004	0.104805	TRUE	FALSE	FALSE	up.early	1931	3469	3603	3675	4659	3347	4633	5763	4004	-1.02619	0.0325909	0.993597	11.5872	11.9445	12.2689
chr16	70114332	70162537	48206	+	PDPR	protein_coding	ENSG00000090857	ENSG00000090857.14	2583.86	-0.456674	0.199734	-0.684778	0.0041121	0.230519	8.77665e-06	TRUE	FALSE	TRUE	down.late	2140	2659	3162	3007	3559	3176	1467	2064	2169	0.240699	0.918502	-1.1592	11.4654	11.6956	10.9899
chr16	70251983	70289707	37725	-	AARS1	protein_coding	ENSG00000090861	ENSG00000090861.17	6663.66	-0.877972	-0.677502	-0.172701	7.35448e-15	2.57786e-09	0.186562	TRUE	TRUE	FALSE	down.early	8000	10033	9751	5507	6851	5198	4448	5714	4672	1.28547	-0.408468	-0.877004	13.2085	12.5139	12.3217
chr16	74447427	74607144	159718	-	GLG1	protein_coding	ENSG00000090863	ENSG00000090863.12	10304.6	-0.697458	-0.221417	-0.432674	3.34379e-09	0.0808591	0.0002855	TRUE	FALSE	TRUE	down.early	9512	13272	15755	10309	12370	10779	6594	8536	6946	0.990288	0.224326	-1.21461	13.6425	13.3938	12.9266
chr16	24610209	24827632	217424	+	TNRC6A	protein_coding	ENSG00000090905	ENSG00000090905.19	3275.77	-0.735138	0.0535728	-0.802024	0.000718438	0.840829	0.000232126	TRUE	FALSE	TRUE	down.late	3304	3403	4352	2813	5213	4258	1451	2173	2751	0.51435	0.627196	-1.14155	11.9312	11.988	11.0982
chr19	39498895	39508481	9587	+	DLL3	protein_coding	ENSG00000090932	ENSG00000090932.11	101.785	1.36183	0.4159	0.653376	2.78929e-06	0.0982277	0.0111105	TRUE	FALSE	FALSE	up.late	48	66	55	118	85	65	175	169	131	-0.94604	-0.197832	1.14387	7.4775	7.73744	8.20358
chr7	76461676	76505995	44320	+	DTX2	protein_coding	ENSG00000091073	ENSG00000091073.19	2078.26	0.734103	-0.674639	1.55162	0.000141164	0.000461195	7.85598e-15	TRUE	TRUE	TRUE	up.late	1437	2212	2162	1025	1388	910	3135	3893	2478	-0.036751	-1.08223	1.11898	10.9628	10.2624	11.7371
chr7	108147623	108456717	309095	-	NRCAM	protein_coding	ENSG00000091129	ENSG00000091129.21	16.8201	-0.0963841	3.77648	-4.13433	0.826644	8.25387e-06	8.5993e-06	FALSE	TRUE	TRUE	down.late	2	2	3	66	61	79	2	1	1	-0.663539	1.25834	-0.594796	6.53834	7.33256	6.56675
chr7	107923799	108003213	79415	-	LAMB1	protein_coding	ENSG00000091136	ENSG00000091136.15	10799.4	0.419766	0.713664	-0.260888	0.00344268	3.07122e-07	0.0767565	TRUE	TRUE	FALSE	up.early	5991	8223	9445	14194	14143	13459	9954	12937	9758	-1.15075	1.00521	0.145543	12.9839	13.731	13.4331
chr7	107891162	107931730	40569	+	DLD	protein_coding	ENSG00000091140	ENSG00000091140.14	3617.51	-0.77178	-0.865373	0.070085	4.9335e-05	6.42302e-06	0.777082	TRUE	TRUE	FALSE	down.early	4233	4882	5948	2176	3693	2993	2584	2938	2852	1.19898	-0.728798	-0.470181	12.3955	11.4487	11.5757
chr3	32481312	32502852	21541	-	CMTM6	protein_coding	ENSG00000091317	ENSG00000091317.8	5852.75	1.11569	-0.165243	1.34436	4.73981e-13	0.33949	9.45351e-18	TRUE	FALSE	TRUE	up.late	3665	4504	4592	3425	4431	3512	9734	11479	7410	-0.484102	-0.800242	1.28434	12.1121	11.9119	13.2319
chr2	172427354	172506459	79106	+	ITGA6	protein_coding	ENSG00000091409	ENSG00000091409.15	37510.6	1.74369	0.605054	1.06478	3.63086e-31	5.34128e-05	1.94512e-12	TRUE	TRUE	TRUE	up.late	13980	19332	22878	24947	37413	29808	61124	77196	54341	-1.03075	-0.186966	1.21771	14.205	14.8637	15.9604
chr2	173075435	173268015	192581	+	MAP3K20	protein_coding	ENSG00000091436	ENSG00000091436.17	5731.02	0.0615346	0.505263	-0.436259	0.687804	8.69497e-06	0.00013191	FALSE	TRUE	TRUE	down.late	3971	4860	5762	5390	8538	7771	4819	5911	5123	-0.765312	1.27772	-0.512405	12.3037	12.8326	12.3692
chr1	241497603	241519755	22153	-	FH	protein_coding	ENSG00000091483	ENSG00000091483.7	3776.08	-0.531843	-0.0394773	-0.454498	0.00163764	0.864326	0.0058292	TRUE	FALSE	TRUE	down.late	3960	4082	4686	3199	5307	4277	2485	3024	3091	0.6571	0.474928	-1.13203	12.1163	12.0593	11.5569
chr4	25747433	25863760	116328	-	SEL1L3	protein_coding	ENSG00000091490	ENSG00000091490.11	781.376	0.452405	-0.0870539	0.538241	0.00899307	0.682256	0.00122349	TRUE	FALSE	TRUE	up.late	685	590	687	583	749	716	938	1218	886	-0.414487	-0.74432	1.15881	9.72206	9.63017	10.1604
chr17	18183078	18209954	26877	+	ALKBH5	protein_coding	ENSG00000091542	ENSG00000091542.9	8273.49	0.876574	1.15613	-0.241991	4.59024e-14	3.38725e-23	0.0550764	TRUE	TRUE	FALSE	up.early	3536	5777	5289	10955	12687	9889	8129	9839	9091	-1.28655	0.895995	0.39055	12.2782	13.4367	13.1684
chr17	5499427	5619424	119998	-	NLRP1	protein_coding	ENSG00000091592	ENSG00000091592.16	326.604	5.51474	4.9037	0.422516	1.2941e-54	3.66938e-43	0.0689288	TRUE	TRUE	FALSE	up.early	8	13	17	449	337	386	557	723	396	-1.2945	0.461705	0.832792	6.84692	9.02762	9.48841
chr17	6451263	6556555	105293	-	PITPNM3	protein_coding	ENSG00000091622	ENSG00000091622.16	1898.53	-0.878224	-0.212467	-0.588301	7.58164e-08	0.217862	0.000278642	TRUE	FALSE	TRUE	down.late	1693	2783	2899	2104	2072	1957	1126	1576	1073	0.904446	0.290954	-1.1954	11.3248	11.072	10.4598
chr16	46689643	46698394	8752	+	ORC6	protein_coding	ENSG00000091651	ENSG00000091651.9	861.069	-0.351291	-0.648531	0.247572	0.0964048	0.00135055	0.232291	FALSE	TRUE	FALSE	down.early	1023	1241	1039	540	916	567	620	768	1076	1.00275	-0.895964	-0.106785	10.2918	9.63301	9.90683
chr7	130018287	130051451	33165	-	ZC3HC1	protein_coding	ENSG00000091732	ENSG00000091732.17	965.848	-0.606384	-0.135929	-0.401853	0.000684942	0.495955	0.0220158	TRUE	FALSE	FALSE	down.late	873	1477	1243	1153	1176	825	670	778	623	0.824442	0.28073	-1.10517	10.3452	10.1814	9.76382
chr6	151656691	152129619	472929	+	ESR1	protein_coding	ENSG00000091831	ENSG00000091831.24	106.62	-1.78232	-1.75977	-0.0147661	1.3632e-11	1.4767e-11	0.969807	TRUE	TRUE	FALSE	down.early	147	191	269	46	87	62	37	62	65	1.30541	-0.650052	-0.655362	8.41984	7.48266	7.48011
chr6	153004459	153131282	126824	-	RGS17	protein_coding	ENSG00000091844	ENSG00000091844.8	292.412	0.0691047	0.485692	-0.401251	0.78107	0.00958355	0.0320041	FALSE	TRUE	FALSE	down.late	179	262	302	286	457	398	254	299	227	-0.691678	1.12058	-0.428905	8.58841	8.99857	8.64788
chr17	44011188	44023946	12759	-	TMEM101	protein_coding	ENSG00000091947	ENSG00000091947.10	1030.13	0.809385	0.230709	0.455052	0.00011806	0.27058	0.0241097	TRUE	FALSE	FALSE	up.late	519	887	840	1113	966	737	1483	1722	1085	-0.858223	-0.207676	1.0659	9.8014	10.0672	10.5876
chr3	112596797	112649530	52734	-	CCDC80	protein_coding	ENSG00000091986	ENSG00000091986.16	1393.92	-0.449091	0.512996	-1.13516	0.0572298	0.0216132	4.15027e-06	FALSE	FALSE	TRUE	down.late	1136	1096	1666	1666	3030	1881	654	824	905	-0.0652128	1.02772	-0.962512	10.4634	11.0626	9.97151
chr14	24136163	24138967	2805	+	PSME1	protein_coding	ENSG00000092010	ENSG00000092010.15	4073.12	0.100105	-0.367736	0.482595	0.614478	0.0206507	0.00222076	FALSE	FALSE	TRUE	up.late	3523	4862	4607	3429	3415	2890	4800	5526	3690	0.382507	-1.11314	0.73063	12.1299	11.7037	12.2291
chr14	23125295	23183674	58380	-	SLC7A8	protein_coding	ENSG00000092068	ENSG00000092068.20	47.1717	-1.58668	-0.311029	-0.893801	4.85605e-05	0.258609	0.010702	TRUE	FALSE	FALSE	down.early	44	76	114	59	64	51	16	24	10	0.926148	0.198763	-1.12491	7.61063	7.39625	7.00611
chr14	23346306	23352912	6607	-	SLC22A17	protein_coding	ENSG00000092096	ENSG00000092096.18	4.20314	1.72348	4.11271	-0.488135	0.0278419	0.000755473	0.222368	FALSE	TRUE	FALSE	up.early	0	0	0	13	9	7	3	3	3	-1.18118	1.08722	0.0939536	6.28361	6.78433	6.56508
chr14	31100112	31207804	107693	-	HECTD1	protein_coding	ENSG00000092148	ENSG00000092148.13	9643.11	-0.25041	-0.30546	0.0604045	0.0236338	0.0040362	0.685618	FALSE	TRUE	FALSE	down.early	8498	11616	13493	7680	10475	8824	8221	9988	8823	1.23875	-0.827371	-0.411374	13.4476	13.1186	13.1849
chr14	21209136	21269494	60359	-	HNRNPC	protein_coding	ENSG00000092199	ENSG00000092199.18	21517.4	-0.0333971	0.299755	-0.337107	0.812859	0.00269821	0.000717372	FALSE	TRUE	TRUE	down.late	17434	20585	23591	21791	31055	24992	17078	19448	19543	-0.545324	1.29216	-0.746838	14.2975	14.6219	14.262
chr14	24249114	24264432	15319	-	TGM1	protein_coding	ENSG00000092295	ENSG00000092295.12	350.514	-3.27596	-2.50291	-0.517911	5.33909e-28	8.48294e-18	0.0425202	TRUE	TRUE	FALSE	down.early	629	970	834	167	129	146	64	106	63	1.29366	-0.466551	-0.827109	9.92978	8.07684	7.69728
chr5	116443555	116574823	131269	-	SEMA6A	protein_coding	ENSG00000092421	ENSG00000092421.17	93.8844	3.95563	0.404983	3.00964	9.67316e-14	0.206132	7.51239e-10	TRUE	FALSE	TRUE	up.late	11	15	7	29	39	52	166	191	153	-0.776611	-0.511266	1.28788	6.88831	7.10298	8.55854
chr15	50552473	50686797	134325	-	TRPM7	protein_coding	ENSG00000092439	ENSG00000092439.16	1719.44	-0.619005	-0.204181	-0.306192	0.00513964	0.355036	0.15308	TRUE	FALSE	FALSE	down.early	1769	1989	2590	1310	2097	2085	1021	1292	1362	0.840622	0.0665858	-0.907208	11.1515	10.8507	10.4724
chr15	41557675	41583589	25915	+	TYRO3	protein_coding	ENSG00000092445	ENSG00000092445.12	821.775	0.338506	0.593681	-0.222747	0.0728092	0.00089477	0.240101	FALSE	TRUE	FALSE	up.early	549	807	661	950	1290	787	667	821	878	-1.04025	0.928076	0.112171	9.59055	10.1704	9.93003
chr1	119648411	119744218	95808	+	PHGDH	protein_coding	ENSG00000092621	ENSG00000092621.13	2909.18	1.7342	0.818373	0.790506	3.41156e-21	6.69268e-06	1.094e-05	TRUE	TRUE	TRUE	up.early	1198	1539	1369	3056	2507	2263	4826	5303	4154	-1.11244	-0.0144632	1.1269	10.5864	11.403	12.2518
chr20	62816244	62841159	24916	+	COL9A3	protein_coding	ENSG00000092758	ENSG00000092758.18	192.334	5.64632	0.733938	4.50264	6.53936e-41	0.0311276	2.30699e-38	TRUE	FALSE	TRUE	up.late	3	14	10	51	10	24	654	682	450	-0.75306	-0.565718	1.31878	6.78741	7.0259	9.42488
chr6	158765741	158819368	53628	-	EZR	protein_coding	ENSG00000092820	ENSG00000092820.18	13192.4	-0.18125	-0.57691	0.367901	0.294094	0.000147484	0.0167616	FALSE	TRUE	FALSE	down.early	14884	16942	15271	9411	13020	8748	12924	15459	12141	0.880007	-1.12515	0.245141	13.9496	13.323	13.7512
chr12	56158346	56163496	5151	+	MYL6	protein_coding	ENSG00000092841	ENSG00000092841.19	13494.2	-0.708001	-0.23273	-0.371365	0.000302113	0.238706	0.0527498	TRUE	FALSE	FALSE	down.early	14071	21059	15749	16388	14842	11220	10357	9955	8156	0.903778	0.111699	-1.01548	14.0559	13.7313	13.2694
chr17	35005990	35089319	83330	-	RFFL	protein_coding	ENSG00000092871	ENSG00000092871.17	2148.79	0.321682	-0.277724	0.621058	0.0133063	0.0313448	4.47124e-07	FALSE	FALSE	TRUE	up.late	1704	2400	2461	1506	1855	1447	2372	3072	2772	-0.0375818	-1.09113	1.12871	11.1339	10.8379	11.4617
chr17	75827225	75844552	17328	-	UNC13D	protein_coding	ENSG00000092929	ENSG00000092929.12	2169.89	-0.321872	-1.99225	1.62659	0.0513059	9.59478e-36	3.78347e-24	FALSE	TRUE	TRUE	down.early	2909	3464	3315	720	1020	665	2224	2767	2482	0.846297	-1.2974	0.451107	11.7124	9.87203	11.3731
chr8	26514031	26658178	144148	+	DPYSL2	protein_coding	ENSG00000092964	ENSG00000092964.18	8273.46	-1.89991	0.134924	-2.07242	3.85927e-32	0.464181	5.15005e-38	TRUE	FALSE	TRUE	down.late	8948	11346	11518	11431	12863	11155	2010	2961	3060	0.577785	0.736543	-1.31433	13.3618	13.5189	11.4898
chr3	37052626	37183689	131064	-	LRRFIP2	protein_coding	ENSG00000093167	ENSG00000093167.18	1315.87	-0.00708934	-0.350721	0.345438	0.972878	0.00758756	0.00931555	FALSE	TRUE	TRUE	up.late	1235	1469	1614	916	1481	1015	1266	1499	1417	0.630614	-1.22448	0.593869	10.6307	10.2696	10.6236
chr3	42547969	42601080	53112	-	SEC22C	protein_coding	ENSG00000093183	ENSG00000093183.14	1947.53	-0.0775138	0.418703	-0.503056	0.588911	0.000142237	4.22961e-06	FALSE	TRUE	TRUE	down.late	1494	1928	2097	2262	2946	2368	1333	1658	1681	-0.48265	1.29406	-0.811408	10.9037	11.3264	10.8254
chrX	48801377	48824982	23606	+	HDAC6	protein_coding	ENSG00000094631	ENSG00000094631.21	1363.29	-0.42841	-0.113235	-0.279986	0.00233896	0.49733	0.0514762	TRUE	FALSE	FALSE	down.late	1159	1768	1662	1435	1706	1346	1118	1315	892	0.874448	0.269303	-1.14375	10.734	10.6082	10.3143
chr5	170763350	170814047	50698	+	GABRP	protein_coding	ENSG00000094755	ENSG00000094755.17	579.919	0.53454	-2.35907	3.06473	0.037918	4.64071e-16	3.46819e-26	FALSE	TRUE	TRUE	up.late	663	420	711	98	164	123	921	1374	591	0.347393	-1.23695	0.889559	9.56353	7.94275	10.1182
chr12	54230942	54280133	49192	-	CBX5	protein_coding	ENSG00000094916	ENSG00000094916.16	13653.5	-0.863804	-0.0652983	-0.751152	1.97331e-05	0.794436	0.000187936	TRUE	FALSE	TRUE	down.late	14229	17408	19467	11831	22099	15098	6075	8896	9878	0.702406	0.463836	-1.16624	14.0378	13.9155	13.0796
chr2	47403067	47663146	260080	+	MSH2	protein_coding	ENSG00000095002	ENSG00000095002.15	2551.78	0.304263	-0.161752	0.478788	0.111383	0.413365	0.00696706	FALSE	FALSE	TRUE	up.late	2148	2619	2432	1788	2776	1917	2576	2850	3945	-0.129189	-0.835622	0.964811	11.3354	11.1274	11.6575
chr5	56815549	56896152	80604	+	MAP3K1	protein_coding	ENSG00000095015	ENSG00000095015.6	1282.72	-0.723734	-0.848153	0.0997512	5.90499e-06	1.28746e-07	0.620892	TRUE	TRUE	FALSE	down.early	1532	1807	2094	759	1298	930	957	1233	998	1.25169	-0.775876	-0.475815	10.9436	10.117	10.2393
chr19	12763003	12872740	109738	-	HOOK2	protein_coding	ENSG00000095066	ENSG00000095066.12	947.153	-0.195433	-0.718557	0.473664	0.313826	3.75401e-05	0.00579947	FALSE	TRUE	TRUE	down.early	845	1416	1244	772	816	554	967	1091	840	0.875334	-1.15349	0.278151	10.3612	9.67564	10.1594
chr9	109171975	109320964	148990	-	EPB41L4B	protein_coding	ENSG00000095203	ENSG00000095203.14	1850.27	-0.626957	-0.773333	0.11977	0.000225801	5.1253e-06	0.555713	TRUE	TRUE	FALSE	down.early	2012	2512	3124	1101	1736	1541	1303	1680	1745	1.20596	-0.79158	-0.414375	11.3955	10.6058	10.755
chr9	105694541	105776629	82089	+	TMEM38B	protein_coding	ENSG00000095209	ENSG00000095209.12	811.071	0.745738	-0.00566073	0.736289	0.00011127	0.985594	0.000118779	TRUE	FALSE	TRUE	up.late	432	779	697	579	958	606	985	1042	1215	-0.604774	-0.602174	1.20695	9.61469	9.61573	10.3403
chr9	122370530	122395703	25174	+	PTGS1	protein_coding	ENSG00000095303	ENSG00000095303.17	231.123	-2.50776	1.73178	-4.33195	4.47176e-18	4.62342e-13	4.26506e-53	TRUE	TRUE	TRUE	down.late	98	161	184	533	536	517	17	21	40	-0.0607498	1.17368	-1.11293	8.13708	9.37526	7.08169
chr9	128947699	129007096	59398	+	NUP188	protein_coding	ENSG00000095319	ENSG00000095319.14	8125.24	0.388952	0.420208	-0.0411188	0.00294633	0.000949743	0.831175	TRUE	TRUE	FALSE	up.early	5712	7179	6832	8124	11586	8340	7142	9314	9460	-1.21522	0.720261	0.494961	12.7118	13.1686	13.1155
chr9	129094794	129111189	16396	-	CRAT	protein_coding	ENSG00000095321	ENSG00000095321.17	800.135	-6.57717	-1.49595	-5.02045	2.03255e-110	1.23827e-11	6.04383e-64	TRUE	TRUE	TRUE	down.early	1293	2169	2339	646	528	603	20	20	11	1.01695	0.229957	-1.24691	10.9091	9.54021	6.97142
chr9	98199011	98255649	56639	-	TBC1D2	protein_coding	ENSG00000095383	ENSG00000095383.20	4941.14	1.79727	1.40074	0.345891	2.09835e-44	2.39155e-27	0.00875787	TRUE	TRUE	TRUE	up.early	1867	2193	2037	5719	6325	4862	6799	8018	6856	-1.29488	0.408166	0.886716	11.1065	12.4688	12.8516
chr9	114402080	114505473	103394	-	WHRN	protein_coding	ENSG00000095397	ENSG00000095397.16	124.527	1.14931	0.923281	0.116384	6.40093e-05	0.00110056	0.68189	TRUE	TRUE	FALSE	up.early	51	51	82	172	152	131	186	192	118	-1.16185	0.407371	0.75448	7.557	8.10141	8.22184
chr10	100232298	100267680	35383	-	CWF19L1	protein_coding	ENSG00000095485	ENSG00000095485.18	1490.96	0.501537	0.260515	0.193395	0.000389401	0.0716317	0.209555	TRUE	FALSE	FALSE	up.early	939	1353	1250	1740	1642	1287	1715	1813	1767	-1.08849	0.0819375	1.00656	10.4116	10.6845	10.9
chr10	91923770	92030325	106556	+	BTAF1	protein_coding	ENSG00000095564	ENSG00000095564.14	2918.39	0.399858	0.090285	0.276823	0.0061462	0.619493	0.061497	TRUE	FALSE	FALSE	up.late	2073	2725	3055	2206	3333	2962	3151	3693	3168	-0.778635	-0.333668	1.1123	11.399	11.4968	11.8147
chr10	96189171	96271587	82417	-	BLNK	protein_coding	ENSG00000095585	ENSG00000095585.17	80.8394	-1.16377	-1.75024	0.30831	7.0077e-05	3.77767e-08	0.237301	TRUE	TRUE	FALSE	down.early	137	102	181	43	46	36	62	70	40	1.23308	-0.847487	-0.385594	8.1175	7.29368	7.47657
chr10	95311771	95561414	249644	-	SORBS1	protein_coding	ENSG00000095637	ENSG00000095637.22	55.6015	2.24328	-0.23999	2.80712	1.29727e-07	0.428262	6.35993e-10	TRUE	FALSE	TRUE	up.late	26	23	24	6	29	16	89	153	145	-0.497939	-0.769227	1.26717	7.06862	6.92507	8.00258
chr10	28677510	28682932	5423	+	BAMBI	protein_coding	ENSG00000095739	ENSG00000095739.11	261.064	-1.60296	-0.523553	-0.941458	1.64898e-15	0.00499121	3.11886e-06	TRUE	TRUE	TRUE	down.early	351	477	355	274	304	212	116	130	133	1.05528	0.123807	-1.17908	9.0775	8.63503	8.01613
chr19	55364382	55370463	6082	-	IL11	protein_coding	ENSG00000095752	ENSG00000095752.7	91.7035	2.94419	0.0865681	2.67095	1.1142e-08	0.80225	1.56688e-07	TRUE	FALSE	TRUE	up.late	22	16	28	30	24	23	342	374	100	-0.612943	-0.51922	1.13216	7.0929	7.16076	8.35659
chr19	3473986	3480525	6540	-	SMIM24	protein_coding	ENSG00000095932	ENSG00000095932.7	4.69444	-4.83686	-4.59048	0	0.00037522	0.000437822	1	TRUE	TRUE	FALSE	down.early	8	20	16	0	0	0	0	0	0	1.32479	-0.662396	-0.662396	6.88974	6.28361	6.28361
chr6	41158506	41163186	4681	-	TREM2	protein_coding	ENSG00000095970	ENSG00000095970.17	5.1232	2.81797	4.4165	-0.310925	0.00625636	0.000391176	0.390769	TRUE	TRUE	FALSE	up.early	0	0	0	13	14	7	6	6	2	-1.21759	0.98704	0.230549	6.28361	6.81064	6.6298
chr6	35573585	35728583	154999	-	FKBP5	protein_coding	ENSG00000096060	ENSG00000096060.15	18049	-4.63304	0.32632	-5.07577	7.87426e-96	0.112686	6.88844e-115	TRUE	FALSE	TRUE	down.late	15689	24491	28398	28587	31213	33741	616	827	1232	0.56706	0.754713	-1.32177	14.4604	14.9043	9.99235
chr6	52671113	52686588	15476	+	TMEM14A	protein_coding	ENSG00000096092	ENSG00000096092.6	800.379	-0.712108	-0.470909	-0.191925	2.00238e-07	0.000558378	0.212147	TRUE	TRUE	FALSE	down.early	833	1197	1121	743	808	679	544	618	695	1.23401	-0.291577	-0.942435	10.228	9.77786	9.58581
chr6	52362123	52529886	167764	+	EFHC1	protein_coding	ENSG00000096093	ENSG00000096093.16	518.102	-1.47895	0.0478829	-1.57712	2.7094e-09	0.864856	5.06681e-10	TRUE	FALSE	TRUE	down.late	500	697	835	641	747	669	181	185	254	0.547066	0.69672	-1.24379	9.60505	9.69945	8.47543
chr6	33620365	33696574	76210	+	ITPR3	protein_coding	ENSG00000096433	ENSG00000096433.11	14213.7	-0.642979	-0.195369	-0.41601	3.92685e-10	0.0840275	6.53779e-05	TRUE	FALSE	TRUE	down.early	14104	18417	18682	13635	17682	13954	9422	12360	10547	0.987665	0.254458	-1.24212	14.0767	13.8599	13.4173
chr6	7541617	7586714	45098	+	DSP	protein_coding	ENSG00000096696	ENSG00000096696.14	19321.1	-0.188861	-0.519316	0.311177	0.228377	0.000182213	0.0302322	FALSE	TRUE	FALSE	down.early	17385	23514	28006	13039	20103	14620	17858	23048	17947	0.943363	-1.11965	0.17629	14.4868	13.9172	14.275
chr10	67884656	67918390	33735	+	SIRT1	protein_coding	ENSG00000096717	ENSG00000096717.12	730.756	0.618551	0.205662	0.337733	0.000304172	0.252953	0.0483283	TRUE	FALSE	FALSE	up.late	546	622	680	502	1011	721	745	992	765	-0.929086	-0.160138	1.08922	9.49649	9.71115	10.0599
chr10	68331174	68343191	12018	+	HNRNPH3	protein_coding	ENSG00000096746	ENSG00000096746.17	2866.6	0.524576	0.163877	0.282909	0.00838491	0.436056	0.151526	TRUE	FALSE	FALSE	up.late	1860	2326	2768	1947	3859	2610	3126	3685	3814	-0.744774	-0.215374	0.960148	11.2755	11.4539	11.85
chr9	26947039	27066134	119096	+	IFT74	protein_coding	ENSG00000096872	ENSG00000096872.17	532.93	0.102409	0.750645	-0.59112	0.729929	0.00255631	0.0133233	FALSE	TRUE	FALSE	down.late	316	340	458	498	914	978	497	475	374	-0.658039	1.04294	-0.384897	9.06676	9.79417	9.18356
chr9	4984390	5129948	145559	+	JAK2	protein_coding	ENSG00000096968	ENSG00000096968.14	377.123	0.623322	0.891242	-0.203522	0.00136996	5.12688e-06	0.311612	TRUE	TRUE	FALSE	up.early	168	253	304	353	640	502	402	417	416	-1.1735	0.875822	0.297675	8.58839	9.28789	9.09055
chr9	130713016	130887675	174660	+	ABL1	protein_coding	ENSG00000097007	ENSG00000097007.19	6067.31	0.415076	1.03349	-0.580646	0.00041319	8.19937e-20	2.97598e-07	TRUE	TRUE	TRUE	up.early	3175	4398	4772	8796	9573	7838	4819	6102	5652	-1.06947	1.20098	-0.131503	12.0534	13.0842	12.4793
chr1	85156889	85201016	44128	-	SYDE2	protein_coding	ENSG00000097096	ENSG00000097096.9	492.999	0.351179	-0.183055	0.549179	0.0155128	0.238943	7.46753e-05	FALSE	FALSE	TRUE	up.late	388	493	539	360	447	396	567	710	561	-0.207098	-0.997174	1.20427	9.26065	9.08988	9.56571
chr9	75890644	76362975	472332	+	PCSK5	protein_coding	ENSG00000099139	ENSG00000099139.14	600.437	-1.53161	-4.23801	2.65655	4.31236e-20	1.87104e-110	4.44293e-43	TRUE	TRUE	TRUE	down.early	936	1302	1499	57	76	80	395	507	433	1.11247	-1.18624	0.073766	10.4975	7.58482	9.18136
chr10	100347233	100364826	17594	+	SCD	protein_coding	ENSG00000099194	ENSG00000099194.6	39138.7	0.445923	0.549981	-0.099568	0.00572325	0.000447754	0.615003	TRUE	TRUE	FALSE	up.early	23924	30507	34855	42969	45863	50117	36906	52083	36749	-1.14578	0.769234	0.376543	14.8674	15.4754	15.3507
chr10	114431113	114768061	336949	-	ABLIM1	protein_coding	ENSG00000099204	ENSG00000099204.20	6738.54	0.611392	-0.148257	0.793125	0.000296381	0.432824	2.24475e-06	TRUE	FALSE	TRUE	up.late	4507	5657	6978	4043	6562	5124	7529	10615	10278	-0.354375	-0.833815	1.18819	12.5451	12.3424	13.1974
chr9	5765076	5833117	68042	-	ERMP1	protein_coding	ENSG00000099219	ENSG00000099219.14	4435.29	0.67947	-0.40555	1.17648	1.87297e-05	0.0102877	2.6999e-13	TRUE	FALSE	TRUE	up.late	2894	3892	5119	2322	3557	2787	5837	7617	6240	-0.166629	-1.01737	1.184	11.9871	11.5329	12.7082
chr10	33177492	33336262	158771	-	NRP1	protein_coding	ENSG00000099250	ENSG00000099250.18	6552.17	-0.205879	0.915375	-1.15899	0.166946	6.58928e-12	5.3196e-18	FALSE	TRUE	TRUE	down.late	4118	5509	6134	9157	12809	11162	3209	4375	4678	-0.43179	1.28488	-0.853089	12.382	13.3142	12.1532
chr10	24848614	24952606	103993	-	PRTFDC1	protein_coding	ENSG00000099256	ENSG00000099256.19	26.7323	-4.28438	-0.148812	-3.86038	4.77312e-09	0.643246	1.44095e-07	TRUE	FALSE	TRUE	down.late	33	42	36	15	43	41	3	1	3	0.791712	0.447627	-1.23934	7.33976	7.19831	6.50483
chr1	99646113	99694541	48429	+	PALMD	protein_coding	ENSG00000099260	ENSG00000099260.11	77.1079	3.5715	0.234119	3.0989	7.48345e-24	0.407408	7.03023e-21	TRUE	FALSE	TRUE	up.late	15	14	17	25	26	21	192	215	130	-0.733588	-0.578445	1.31203	6.92636	7.03509	8.36012
chr10	69451465	69507666	56202	+	TSPAN15	protein_coding	ENSG00000099282	ENSG00000099282.10	395.855	0.204442	-1.48266	1.73494	0.288248	1.04555e-15	4.33679e-21	FALSE	TRUE	TRUE	up.late	410	488	504	152	212	132	478	605	585	0.488405	-1.3003	0.811899	9.26446	8.21168	9.45485
chr10	70052544	70112282	59739	+	MACROH2A2	protein_coding	ENSG00000099284	ENSG00000099284.15	638.085	-0.0371961	-0.804987	0.74598	0.898222	0.000288812	0.000667756	FALSE	TRUE	TRUE	up.late	627	914	776	351	495	292	674	880	797	0.621533	-1.16085	0.539318	9.83026	9.07465	9.79541
chr19	38319845	38332076	12232	+	KCNK6	protein_coding	ENSG00000099337	ENSG00000099337.5	471.754	-0.692684	-1.01127	0.172882	0.0190311	0.00117853	0.538942	FALSE	TRUE	FALSE	down.early	618	877	930	407	422	282	320	415	124	1.04539	-0.652228	-0.393157	9.77048	8.79812	8.94651
chr19	38335775	38370943	35169	+	CATSPERG	protein_coding	ENSG00000099338	ENSG00000099338.23	24.1724	0.803045	-0.188782	1.29801	0.0272009	0.54757	0.00314367	FALSE	FALSE	TRUE	up.late	12	21	27	16	10	8	43	54	34	-0.3776	-0.820495	1.1981	6.96209	6.86353	7.3127
chr16	30923055	30948783	25729	+	FBXL19	protein_coding	ENSG00000099364	ENSG00000099364.18	1744.51	-0.684113	-0.394279	-0.219993	1.84022e-05	0.012809	0.199259	TRUE	FALSE	FALSE	down.early	1510	2712	2502	1795	1893	1413	1233	1448	1331	1.12284	-0.186674	-0.93617	11.22	10.7952	10.5521
chr16	30985207	30989147	3941	+	HSD3B7	protein_coding	ENSG00000099377	ENSG00000099377.14	907.898	-3.18789	-0.719038	-2.29163	8.21686e-36	0.00200782	3.57269e-19	TRUE	TRUE	TRUE	down.late	1302	2009	1625	1023	867	824	193	211	116	0.96376	0.284523	-1.24828	10.8053	10.0245	8.26238
chr16	30957754	30984664	26911	+	SETD1A	protein_coding	ENSG00000099381	ENSG00000099381.18	1524.71	-0.482255	-0.102994	-0.321384	0.00984154	0.63588	0.0802622	TRUE	FALSE	FALSE	down.late	1444	1904	1870	1572	1877	1597	899	1198	1414	0.74594	0.295071	-1.04101	10.9052	10.7732	10.3821
chr16	30833626	30894302	60677	-	BCL7C	protein_coding	ENSG00000099385	ENSG00000099385.12	1025.7	-1.09106	-0.246435	-0.779351	2.4404e-13	0.110235	1.8424e-07	TRUE	FALSE	TRUE	down.late	1194	1408	1418	972	1344	1079	628	639	568	0.921934	0.329136	-1.25107	10.5564	10.2887	9.57539
chr9	21802636	21937651	135016	+	MTAP	protein_coding	ENSG00000099810	ENSG00000099810.21	18.268	5.13395	1.98299	2.02741	2.26647e-09	0.00487138	0.000672174	TRUE	TRUE	TRUE	up.late	2	1	2	4	11	6	45	49	19	-0.936267	-0.263743	1.20001	6.4622	6.73844	7.33967
chr19	751112	764318	13207	+	MISP	protein_coding	ENSG00000099812	ENSG00000099812.9	2485.71	-0.0762336	-1.66847	1.57627	0.75098	1.08068e-17	7.18182e-16	FALSE	TRUE	TRUE	up.late	3022	3668	3185	935	1481	735	3029	3398	2885	0.699929	-1.2936	0.593673	11.7579	10.1623	11.6729
chr19	617221	633537	16317	-	POLRMT	protein_coding	ENSG00000099821	ENSG00000099821.14	3141.7	0.498936	0.25314	0.194107	0.000867044	0.0977484	0.233115	TRUE	FALSE	FALSE	up.early	1964	3118	2695	3661	3844	2621	3538	3850	3133	-1.0424	0.0692821	0.973118	11.3992	11.684	11.9156
chr19	589881	617159	27279	+	HCN2	protein_coding	ENSG00000099822	ENSG00000099822.3	80.4607	-2.74252	0.330304	-3.25008	1.88692e-15	0.152183	2.45323e-21	TRUE	FALSE	TRUE	down.late	68	99	120	119	177	117	14	17	9	0.412465	0.879139	-1.2916	7.80054	8.0546	6.87283
chr11	560404	564025	3622	+	RASSF7	protein_coding	ENSG00000099849	ENSG00000099849.15	1409.11	-1.03549	-1.15775	0.0852574	2.13487e-09	4.26697e-11	0.701865	TRUE	TRUE	FALSE	down.early	1716	2832	2104	1102	1110	720	1065	1075	1007	1.27321	-0.737712	-0.535494	11.2079	10.1052	10.2161
chr19	2476122	2478259	2138	+	GADD45B	protein_coding	ENSG00000099860	ENSG00000099860.9	738.632	-0.659333	0.105585	-0.803974	0.00336531	0.672729	0.000358918	TRUE	FALSE	TRUE	down.late	645	887	869	1046	871	748	474	590	427	0.430808	0.674448	-1.10526	9.91881	10.0203	9.2791
chr19	2037465	2051244	13780	-	MKNK2	protein_coding	ENSG00000099875	ENSG00000099875.15	8641.19	-0.558466	-0.0813605	-0.40719	0.0080185	0.744796	0.0437244	TRUE	FALSE	FALSE	down.late	6433	12040	12330	9639	10495	8221	6497	7740	5013	0.643755	0.35152	-0.995275	13.3099	13.1952	12.6669
chr22	19969896	20016823	46928	-	ARVCF	protein_coding	ENSG00000099889	ENSG00000099889.14	1058.1	0.670641	-1.45411	2.2081	0.000183323	5.58235e-15	4.3627e-33	TRUE	TRUE	TRUE	up.late	749	1240	1125	457	511	260	1783	1939	1351	0.227834	-1.23153	1.0037	10.2293	8.9963	10.8849
chr22	20129456	20148007	18552	+	ZDHHC8	protein_coding	ENSG00000099904	ENSG00000099904.16	1780.08	0.52703	0.429826	0.0511982	0.00469554	0.017168	0.839588	TRUE	FALSE	FALSE	up.early	1109	1651	1389	1937	2369	1603	1753	2127	2060	-1.08688	0.416615	0.670265	10.541	11.0186	11.0992
chr22	20774113	20787720	13608	+	SERPIND1	protein_coding	ENSG00000099937	ENSG00000099937.11	6.64587	5.17333	2.91813	0.402629	8.8772e-05	0.00437847	0.280736	TRUE	TRUE	FALSE	up.early	0	0	0	6	3	8	6	14	22	-1.15583	0.183447	0.972379	6.28361	6.65917	6.88041
chr22	20982269	20999032	16764	+	LZTR1	protein_coding	ENSG00000099949	ENSG00000099949.21	1414.08	-0.463858	0.283014	-0.788005	0.00167491	0.0546099	3.99832e-08	TRUE	FALSE	TRUE	down.late	1109	1592	1454	1653	2161	1676	921	1168	1036	0.124986	1.03217	-1.15716	10.6199	10.9345	10.1752
chr22	23768226	23784316	16091	+	MMP11	protein_coding	ENSG00000099953	ENSG00000099953.10	8.81688	-0.128047	1.25074	-2.1533	0.766223	0.0288573	0.00478077	FALSE	FALSE	TRUE	down.late	1	3	5	31	17	8	7	2	1	-0.347754	1.05968	-0.711928	6.60546	6.97184	6.51065
chr22	21009808	21028830	19023	+	P2RX6	protein_coding	ENSG00000099957	ENSG00000099957.16	14.925	2.75987	3.45383	-0.161426	0.00207659	0.000394065	0.640164	TRUE	TRUE	FALSE	up.early	1	1	1	45	20	22	11	26	16	-1.10383	0.715771	0.388061	6.47172	7.05679	6.95142
chr22	24011192	24178628	167437	+	CABIN1	protein_coding	ENSG00000099991	ENSG00000099991.18	3691.59	-0.26168	0.196656	-0.472805	0.104419	0.223353	0.00146931	FALSE	FALSE	TRUE	down.late	2816	4397	4208	4755	4830	4024	2566	3087	2904	0.0702579	0.964174	-1.03443	11.9068	12.1396	11.6191
chr22	30291990	30326947	34958	-	TBC1D10A	protein_coding	ENSG00000099992	ENSG00000099992.16	1178.22	0.322829	-0.208157	0.565524	0.166716	0.353423	0.00925501	FALSE	FALSE	TRUE	up.late	926	1362	1204	940	861	767	1565	1758	1195	-0.035148	-0.843557	0.878705	10.3197	10.0156	10.6635
chr22	24181487	24189106	7620	+	SUSD2	protein_coding	ENSG00000099994	ENSG00000099994.11	394.967	-3.10212	0.493631	-3.70578	9.36062e-44	0.00769979	1.79368e-62	TRUE	TRUE	TRUE	down.late	333	502	524	778	645	643	38	63	54	0.424579	0.872975	-1.29755	9.21899	9.6872	7.42073
chr22	30331988	30356919	24932	-	SF3A1	protein_coding	ENSG00000099995	ENSG00000099995.19	6041.84	0.352112	0.309335	0.0222285	0.00836401	0.0183137	0.917371	TRUE	FALSE	FALSE	up.early	4490	5522	5756	5777	8413	6185	5326	6467	6692	-1.17623	0.52555	0.650676	12.3449	12.6921	12.7176
chr22	24219654	24245142	25489	-	GGT5	protein_coding	ENSG00000099998	ENSG00000099998.18	137.238	-0.625521	6.50762	-7.80589	0.15099	5.79815e-41	1.0859e-25	FALSE	TRUE	TRUE	down.late	4	6	2	495	492	371	2	1	1	-0.616202	1.32825	-0.712049	6.6046	9.09832	6.48168
chr22	30396941	30425303	28363	+	SEC14L2	protein_coding	ENSG00000100003	ENSG00000100003.18	5967.46	-0.628866	0.0854618	-0.727941	0.000964033	0.712004	0.000111106	TRUE	FALSE	TRUE	down.late	5607	7162	7895	7734	7655	8332	3667	4409	2647	0.456655	0.703026	-1.15968	12.728	12.8374	12.0108
chr22	24270817	24417739	146923	+	SPECC1L	protein_coding	ENSG00000100014	ENSG00000100014.20	2332.31	-0.414903	0.158086	-0.588499	0.0105969	0.369911	0.00015551	FALSE	FALSE	TRUE	down.late	2133	2566	2655	2332	3453	2561	1400	1824	2179	0.251076	0.882088	-1.13316	11.328	11.522	10.9024
chr22	21666009	21700015	34007	+	PPIL2	protein_coding	ENSG00000100023	ENSG00000100023.19	1478.39	-0.404236	-0.0119418	-0.372246	0.00424582	0.957202	0.00740259	TRUE	FALSE	TRUE	down.late	1427	1725	1842	1479	2061	1613	893	1153	1320	0.629448	0.574331	-1.20378	10.7943	10.7823	10.3941
chr22	30576625	30607083	30459	-	PES1	protein_coding	ENSG00000100029	ENSG00000100029.18	5062.52	0.0360882	0.441852	-0.401058	0.86206	0.00253281	0.00649973	FALSE	TRUE	TRUE	down.late	3596	5117	4407	6703	7324	5253	4127	4469	4876	-0.659865	1.16477	-0.504909	12.1516	12.635	12.1926
chr22	18912777	18936553	23777	-	PRODH	protein_coding	ENSG00000100033	ENSG00000100033.16	99.9637	1.28609	-0.262902	1.8908	0.000241186	0.351545	8.60604e-07	TRUE	FALSE	TRUE	up.late	60	76	73	62	35	46	169	233	93	-0.362156	-0.781281	1.14344	7.55938	7.35228	8.30331
chr22	37469063	37486393	17331	-	MFNG	protein_coding	ENSG00000100060	ENSG00000100060.18	90.7107	1.60009	0.0615886	1.49793	2.5709e-07	0.842863	1.70341e-06	TRUE	FALSE	TRUE	up.late	39	57	49	65	70	37	137	165	195	-0.671767	-0.59349	1.26526	7.41293	7.44619	8.23608
chr22	25564675	25729294	164620	+	GRK3	protein_coding	ENSG00000100077	ENSG00000100077.15	417.55	-0.846379	-0.035686	-0.780921	2.47923e-05	0.891332	9.6422e-05	TRUE	FALSE	TRUE	down.late	444	500	512	410	627	492	211	238	341	0.65349	0.554393	-1.20788	9.33341	9.29716	8.65238
chr22	19330698	19447450	116753	-	HIRA	protein_coding	ENSG00000100084	ENSG00000100084.14	2124.82	-0.14902	0.32237	-0.493754	0.480579	0.0719931	0.00547585	FALSE	FALSE	TRUE	down.late	1708	2093	2120	2400	3284	2447	1250	1770	2216	-0.203327	1.02994	-0.826608	11.0611	11.4456	10.8668
chr22	37634654	37656117	21464	+	SH3BP1	protein_coding	ENSG00000100092	ENSG00000100092.24	1485.99	2.19157	-0.314434	2.55293	1.99024e-68	0.0184237	2.13282e-91	TRUE	FALSE	TRUE	up.late	493	862	743	498	763	526	2894	3331	2937	-0.526922	-0.794812	1.32173	9.72037	9.43078	11.7188
chr22	37675636	37679802	4167	+	LGALS1	protein_coding	ENSG00000100097	ENSG00000100097.12	35856.8	-0.331256	0.532006	-0.965915	0.117883	0.0073756	3.40284e-06	FALSE	TRUE	TRUE	down.late	24025	39864	33957	59099	51035	44279	28388	27162	17215	-0.131229	1.08006	-0.948827	14.9826	15.6234	14.55
chr22	26483877	26494658	10782	+	SRRD	protein_coding	ENSG00000100104	ENSG00000100104.13	880.367	0.466302	0.597794	-0.116374	0.0304918	0.00410991	0.632149	FALSE	TRUE	FALSE	up.early	667	623	643	778	1255	953	858	1023	1058	-1.05145	0.729404	0.322044	9.59696	10.2315	10.0863
chr22	31325804	31346346	20543	-	PATZ1	protein_coding	ENSG00000100105	ENSG00000100105.18	1034.88	0.318303	0.524752	-0.193926	0.0133138	1.65442e-05	0.151913	FALSE	TRUE	FALSE	up.early	654	919	901	1274	1392	1120	946	1143	1035	-1.18907	1.0342	0.154868	9.93138	10.4264	10.2306
chr22	37807905	37817176	9272	+	GCAT	protein_coding	ENSG00000100116	ENSG00000100116.17	693.838	0.336078	0.682943	-0.306908	0.0397204	1.02909e-05	0.0524485	FALSE	TRUE	FALSE	up.early	405	642	527	951	1011	776	621	796	587	-1.07797	1.07992	-0.00195626	9.38519	10.0012	9.69234
chr22	37830855	37849327	18473	-	ANKRD54	protein_coding	ENSG00000100124	ENSG00000100124.15	1012.83	-0.361663	0.0583903	-0.41122	0.0220625	0.777158	0.00666094	FALSE	FALSE	TRUE	down.late	882	1336	1083	1221	1385	981	730	780	824	0.418303	0.724663	-1.14297	10.2615	10.3291	9.91708
chr22	41673933	41690504	16572	-	SNU13	protein_coding	ENSG00000100138	ENSG00000100138.15	4538.41	0.379778	0.173843	0.175277	0.00342809	0.217227	0.219216	TRUE	FALSE	FALSE	up.early	3509	4255	4329	3894	6287	4343	4283	5040	5104	-1.01786	-0.0191938	1.03706	11.9889	12.1812	12.3846
chr22	37905657	37942822	37166	+	MICALL1	protein_coding	ENSG00000100139	ENSG00000100139.13	13938.9	0.86805	0.0377651	0.809571	3.55136e-07	0.873048	2.17303e-06	TRUE	FALSE	TRUE	up.late	8627	12265	11543	12052	12645	9078	18141	24311	16469	-0.653862	-0.586697	1.24056	13.3918	13.4242	14.3059
chr22	31753867	31908033	154167	+	DEPDC5	protein_coding	ENSG00000100150	ENSG00000100150.20	518.054	-1.52053	-1.09216	-0.311261	2.32165e-14	3.06721e-08	0.110699	TRUE	TRUE	FALSE	down.early	728	902	866	362	470	392	244	290	338	1.25255	-0.367542	-0.885008	9.99132	9.05326	8.75364
chr22	38056311	38075701	19391	+	PICK1	protein_coding	ENSG00000100151	ENSG00000100151.16	952.927	-0.211109	-0.419102	0.200844	0.11031	0.000521327	0.133981	FALSE	TRUE	FALSE	down.early	881	1290	1210	899	891	707	846	968	936	1.11863	-1.10886	-0.00977389	10.2983	9.89853	10.0958
chr22	41969475	41998221	28747	+	SEPTIN3	protein_coding	ENSG00000100167	ENSG00000100167.20	10.5936	-0.770519	-3.04571	1.03177	0.0653849	0.00022544	0.0473628	FALSE	TRUE	FALSE	down.early	17	19	32	1	3	1	9	6	13	1.15223	-1.075	-0.0772233	7.0367	6.50073	6.74084
chr22	32043261	32113029	69769	+	SLC5A1	protein_coding	ENSG00000100170	ENSG00000100170.10	88.8543	3.32305	-0.71734	5.37633	8.83176e-05	0.0995067	6.48233e-09	TRUE	FALSE	TRUE	up.late	27	12	10	3	1	7	265	390	103	-0.44356	-0.831801	1.27536	6.95523	6.59436	8.55299
chr22	16601887	16698742	96856	+	TPTEP1	transcribed_unprocessed_pseudogene	ENSG00000100181	ENSG00000100181.22	183.962	-7.63659	-0.130999	-7.38934	1.01813e-20	0.554429	1.08361e-19	TRUE	FALSE	TRUE	down.late	247	384	455	274	404	299	1	1	1	0.721327	0.606205	-1.32753	8.76041	8.63334	6.49883
chr22	38468078	38483447	15370	+	KDELR3	protein_coding	ENSG00000100196	ENSG00000100196.11	451.454	1.02919	0.146879	0.7769	1.06557e-05	0.542895	0.000709782	TRUE	FALSE	TRUE	up.late	307	286	347	256	443	392	702	855	473	-0.755748	-0.39409	1.14984	8.80921	8.97323	9.67345
chr22	38483438	38507660	24223	-	DDX17	protein_coding	ENSG00000100201	ENSG00000100201.23	16047.3	-0.38955	0.198792	-0.603582	0.00215942	0.139484	7.42919e-07	TRUE	FALSE	TRUE	down.late	13510	16763	19086	16044	22303	19638	10578	14439	12864	0.212483	0.97875	-1.19123	14.0205	14.2474	13.6049
chr22	38518948	38570204	51257	-	DMC1	protein_coding	ENSG00000100206	ENSG00000100206.10	16.4601	-1.68801	0.0262894	-1.79484	0.00385846	0.947195	0.00344601	TRUE	FALSE	TRUE	down.late	15	21	25	17	28	9	3	7	6	0.527407	0.54066	-1.06807	7.02766	7.03109	6.61453
chr22	42160013	42343616	183604	-	TCF20	protein_coding	ENSG00000100207	ENSG00000100207.20	4505.42	0.582687	0.181275	0.340804	0.000193781	0.285224	0.0301976	TRUE	FALSE	FALSE	up.late	3365	3624	4531	3158	5653	4275	4362	5746	5976	-0.903359	-0.20306	1.10642	11.8826	12.0956	12.4939
chr22	38705742	38738299	32558	+	GTPBP1	protein_coding	ENSG00000100226	ENSG00000100226.16	2978.26	0.644904	0.0790758	0.538484	9.75709e-08	0.627006	7.44473e-06	TRUE	FALSE	TRUE	up.late	1913	2672	2762	2465	3278	2622	3426	4469	3253	-0.784922	-0.497184	1.28211	11.3375	11.4271	11.981
chr22	23145326	23164350	19025	+	RAB36	protein_coding	ENSG00000100228	ENSG00000100228.12	502.111	-0.831556	0.897262	-1.85423	1.44973e-05	2.00839e-06	1.34638e-21	TRUE	TRUE	TRUE	down.late	315	417	451	890	934	847	186	234	296	-0.0674211	1.16346	-1.09604	9.16876	9.96056	8.50707
chr22	32801705	32863041	61337	+	TIMP3	protein_coding	ENSG00000100234	ENSG00000100234.12	7792.79	2.14916	0.422727	1.57966	3.42143e-21	0.0426133	5.27652e-12	TRUE	FALSE	TRUE	up.late	2492	3472	4045	4859	5763	4384	15621	20590	9292	-0.894714	-0.341401	1.23612	11.7572	12.2981	13.8405
chr22	38734725	38794143	59419	-	SUN2	protein_coding	ENSG00000100242	ENSG00000100242.15	8118.76	-0.760479	-0.447863	-0.191226	0.000889918	0.0394893	0.413503	TRUE	FALSE	FALSE	down.early	7505	12894	12127	8308	7685	5870	6302	7627	4503	1.00887	-0.222763	-0.786112	13.4341	12.8321	12.5567
chr22	42617840	42649392	31553	-	CYB5R3	protein_coding	ENSG00000100243	ENSG00000100243.21	6027.64	-0.830833	-0.035167	-0.785086	7.64449e-13	0.84278	1.31465e-11	TRUE	FALSE	TRUE	down.late	5669	8036	7765	6110	8198	7099	3802	4476	3538	0.704413	0.60608	-1.31049	12.8381	12.7971	11.998
chr22	38778508	38794198	15691	-	DNAL4	protein_coding	ENSG00000100246	ENSG00000100246.13	506.432	-0.77622	-0.363922	-0.307893	2.94468e-05	0.044638	0.0999457	TRUE	FALSE	FALSE	down.early	465	787	802	513	514	418	351	444	314	1.07629	-0.0801321	-0.996156	9.66407	9.29205	8.99738
chr22	50502949	50507702	4754	-	LMF2	protein_coding	ENSG00000100258	ENSG00000100258.18	3757.08	-0.398111	0.0419086	-0.425579	0.0181615	0.85288	0.00859929	FALSE	FALSE	TRUE	down.late	3048	5094	4120	4771	4966	3416	2793	3306	2672	0.458415	0.63355	-1.09196	12.0353	12.083	11.6132
chr22	42835412	43015149	179738	-	PACSIN2	protein_coding	ENSG00000100266	ENSG00000100266.19	3016.26	-0.353846	-0.214356	-0.112194	0.0063618	0.109822	0.47168	TRUE	FALSE	FALSE	down.early	2834	3738	3905	2810	3551	2697	2482	2968	2351	1.11306	-0.206129	-0.906931	11.8226	11.5828	11.4555
chr22	43110750	43129712	18963	+	BIK	protein_coding	ENSG00000100290	ENSG00000100290.3	531.776	0.284661	-0.290195	0.625792	0.210052	0.16643	0.0030013	FALSE	FALSE	TRUE	up.late	398	704	483	461	484	276	706	733	567	0.0234511	-0.943733	0.920282	9.38077	9.06208	9.67628
chr22	35380361	35394214	13854	+	HMOX1	protein_coding	ENSG00000100292	ENSG00000100292.18	181.279	-0.746571	0.761123	-1.64178	0.0001617	4.03712e-05	1.70173e-16	TRUE	TRUE	TRUE	down.late	149	175	157	280	345	286	71	92	103	-0.075687	1.17841	-1.10272	8.21482	8.7577	7.77023
chr22	29505879	29555216	49338	-	THOC5	protein_coding	ENSG00000100296	ENSG00000100296.14	1842.7	0.5428	0.25133	0.224723	0.0012249	0.140378	0.202258	TRUE	FALSE	FALSE	up.early	1227	1577	1621	1831	2223	1552	1956	2397	2204	-0.981977	0.00854893	0.973428	10.6597	10.9404	11.2137
chr22	35540831	35553999	13169	+	RASD2	protein_coding	ENSG00000100302	ENSG00000100302.7	46.5725	-4.03708	-2.73592	-0.780975	3.84355e-18	1.89082e-12	0.0349288	TRUE	TRUE	FALSE	down.early	102	109	137	11	22	17	7	10	3	1.29849	-0.447006	-0.851489	7.95347	6.93045	6.69339
chr22	39120167	39152680	32514	-	CBX7	protein_coding	ENSG00000100307	ENSG00000100307.13	422.617	1.1111	0.0407194	1.06058	1.94217e-07	0.880596	1.12522e-06	TRUE	FALSE	TRUE	up.late	226	313	355	326	301	273	649	857	513	-0.656076	-0.585581	1.24166	8.75759	8.79129	9.66455
chr22	39223359	39244982	21624	-	PDGFB	protein_coding	ENSG00000100311	ENSG00000100311.17	765.325	-0.405709	-1.75443	1.26504	0.0454095	3.00131e-17	1.49175e-09	FALSE	TRUE	TRUE	down.early	1149	1178	1096	300	422	228	872	1033	697	0.92251	-1.23744	0.314933	10.3276	8.86944	9.91745
chr22	35738736	36028824	290089	-	RBFOX2	protein_coding	ENSG00000100320	ENSG00000100320.23	5420.4	-0.461638	0.103906	-0.570067	0.0117346	0.627468	0.00121037	FALSE	FALSE	TRUE	down.late	4792	5600	7419	5132	7961	6836	3088	4131	4467	0.358088	0.729254	-1.08734	12.532	12.6604	12.0317
chr22	39349925	39385575	35651	+	SYNGR1	protein_coding	ENSG00000100321	ENSG00000100321.15	158.286	2.68823	-0.679847	3.76079	3.9626e-13	0.0312716	1.49922e-21	TRUE	FALSE	TRUE	up.late	48	68	57	28	22	24	415	445	306	-0.455805	-0.825168	1.28097	7.46257	7.12631	9.04367
chr22	39499432	39518132	18701	+	MIEF1	protein_coding	ENSG00000100335	ENSG00000100335.15	3482.72	0.249696	0.466388	-0.207279	0.0434615	4.92924e-05	0.100735	FALSE	TRUE	FALSE	up.early	2299	3091	3237	4039	4828	3874	2952	3662	3630	-1.12303	1.07787	0.0451573	11.5682	12.0494	11.8236
chr22	36253071	36267530	14460	+	APOL1	protein_coding	ENSG00000100342	ENSG00000100342.21	83.8717	-1.92623	-1.48638	-0.207756	2.03141e-08	1.16761e-05	0.458122	TRUE	TRUE	FALSE	down.early	135	162	165	64	50	26	46	56	33	1.24444	-0.479287	-0.765149	8.2031	7.40854	7.27677
chr22	43923792	43964488	40697	+	PNPLA3	protein_coding	ENSG00000100344	ENSG00000100344.11	1255.59	-1.47076	-0.730541	-0.639929	2.90807e-20	3.55103e-06	5.023e-05	TRUE	TRUE	TRUE	down.early	1649	2231	2076	1261	1317	947	575	700	688	1.16243	-0.0721701	-1.09026	11.0386	10.308	9.70543
chr22	36758202	36776256	18055	-	IFT27	protein_coding	ENSG00000100360	ENSG00000100360.15	561.063	-0.694617	0.0568388	-0.760253	0.00134829	0.828883	0.000421462	TRUE	FALSE	TRUE	down.late	470	744	757	766	673	642	386	359	292	0.48977	0.659824	-1.14959	9.61294	9.67878	8.97823
chr22	45192244	45240894	48651	-	KIAA0930	protein_coding	ENSG00000100364	ENSG00000100364.19	3811.13	0.847459	0.868063	-0.016776	1.87653e-07	1.18488e-07	0.949442	TRUE	TRUE	FALSE	up.early	2089	2836	2740	4850	4942	4151	4061	4658	3638	-1.25619	0.645836	0.610357	11.3115	12.1889	12.1726
chr22	36860988	36878017	17030	+	NCF4	protein_coding	ENSG00000100365	ENSG00000100365.16	10.1635	-1.23126	-1.58549	0.0949335	0.0127444	0.00453869	0.798613	FALSE	TRUE	FALSE	down.early	21	21	23	5	5	3	4	8	4	1.29475	-0.748617	-0.546135	7.01863	6.62112	6.66051
chr22	40769630	40819399	49770	-	SLC25A17	protein_coding	ENSG00000100372	ENSG00000100372.15	1211.25	0.383026	0.0376471	0.328646	0.00100525	0.82676	0.00479668	TRUE	FALSE	TRUE	up.late	972	1093	1183	964	1387	1135	1235	1480	1490	-0.754942	-0.53761	1.29255	10.2683	10.3069	10.6314
chr22	37051736	37063390	11655	+	KCTD17	protein_coding	ENSG00000100379	ENSG00000100379.17	382.959	1.05128	1.70852	-0.539305	3.0472e-09	1.08078e-21	0.0012374	TRUE	TRUE	TRUE	up.early	142	193	194	728	583	499	348	388	400	-1.20799	1.04435	0.163641	8.28677	9.52107	9.03844
chr22	41092592	41180077	87486	+	EP300	protein_coding	ENSG00000100393	ENSG00000100393.14	3686.62	-0.199613	-0.378272	0.1745	0.21355	0.00864719	0.281871	FALSE	TRUE	FALSE	down.early	3517	3727	4691	2678	4449	3960	2812	3937	3549	0.986597	-0.949793	-0.0368048	12.1078	11.6855	11.8846
chr22	41205282	41231271	25990	+	L3MBTL2	protein_coding	ENSG00000100395	ENSG00000100395.15	1345.51	-0.598117	0.079205	-0.680966	3.90017e-05	0.674889	1.91871e-06	TRUE	FALSE	TRUE	down.late	1222	1660	1567	1760	1873	1309	827	930	1072	0.498846	0.755596	-1.25444	10.679	10.7627	10.1074
chr22	41229510	41240931	11422	-	CHADL	protein_coding	ENSG00000100399	ENSG00000100399.16	9.24349	0.726677	1.89656	-0.365074	0.103758	0.00404946	0.298739	FALSE	TRUE	FALSE	up.early	2	4	6	11	6	11	10	14	4	-0.989911	1.02293	-0.0330235	6.53829	6.94533	6.7318
chr22	46684410	46738252	53843	-	CERK	protein_coding	ENSG00000100422	ENSG00000100422.14	1357.39	-0.456757	0.515131	-1.02258	0.000670091	7.1306e-05	5.2103e-15	TRUE	TRUE	TRUE	down.late	1014	1421	1570	1773	2262	1828	789	929	851	-0.0659255	1.16518	-1.09925	10.4782	10.9904	10.0482
chr14	45115599	45135319	19721	-	FKBP3	protein_coding	ENSG00000100442	ENSG00000100442.11	1874.81	-0.231996	0.17777	-0.418398	0.0780601	0.187691	0.00058762	FALSE	FALSE	TRUE	down.late	1528	2016	2039	1861	2707	2136	1482	1665	1574	0.077458	1.03915	-1.11661	10.9888	11.1768	10.7554
chr14	22893204	22919182	25979	-	RBM23	protein_coding	ENSG00000100461	ENSG00000100461.18	2247.78	-0.654079	-0.047938	-0.578275	2.7257e-06	0.80798	2.75461e-05	TRUE	FALSE	TRUE	down.late	2070	3001	2632	2529	2942	2094	1408	1796	1813	0.712392	0.545633	-1.25802	11.4306	11.3761	10.7866
chr14	22920525	22929408	8884	-	PRMT5	protein_coding	ENSG00000100462	ENSG00000100462.16	4584.35	0.151371	0.488889	-0.321721	0.355935	0.000491228	0.025838	FALSE	TRUE	FALSE	up.early	3306	3879	3824	4891	7402	5167	3701	4535	5043	-0.883505	1.13974	-0.256234	11.9597	12.4851	12.1225
chr14	31025106	31130996	105891	+	AP4S1	protein_coding	ENSG00000100478	ENSG00000100478.15	246.563	-0.240205	0.533924	-0.865068	0.321664	0.0134369	0.000153174	FALSE	FALSE	TRUE	down.late	182	265	260	406	341	256	145	155	207	-0.256065	1.12811	-0.872048	8.47348	8.9315	8.26966
chr14	50117130	50231578	114449	-	SOS2	protein_coding	ENSG00000100485	ENSG00000100485.12	1339.48	-0.0425166	-0.563942	0.508476	0.843628	0.000310121	0.00107467	FALSE	TRUE	TRUE	up.late	1251	1502	1995	787	1210	1211	1287	1659	1222	0.675746	-1.20626	0.530516	10.7183	10.1533	10.6747
chr14	50329404	50416461	87058	-	CDKL1	protein_coding	ENSG00000100490	ENSG00000100490.9	235.687	0.658712	0.345834	0.220588	0.000610494	0.0653269	0.26468	TRUE	FALSE	FALSE	up.early	162	207	190	238	260	233	207	322	289	-1.09495	0.110924	0.984023	8.28263	8.55994	8.76072
chr14	50857891	50944483	86593	-	PYGL	protein_coding	ENSG00000100504	ENSG00000100504.17	6766.29	1.67265	0.8525	0.74538	6.90008e-33	1.33849e-09	8.68342e-08	TRUE	TRUE	TRUE	up.early	2925	3446	3408	5979	7633	5683	10591	12661	8930	-1.1605	0.0436672	1.11683	11.761	12.6322	13.4087
chr14	50975262	51096061	120800	-	TRIM9	protein_coding	ENSG00000100505	ENSG00000100505.13	39.2474	4.7067	1.86646	2.27801	2.15941e-13	0.00131365	4.19008e-07	TRUE	TRUE	TRUE	up.late	2	2	5	16	26	18	66	83	131	-0.950881	-0.26473	1.21561	6.57198	6.95831	7.79179
chr14	67386984	67412167	25184	-	PLEK2	protein_coding	ENSG00000100558	ENSG00000100558.9	2006.68	1.66307	0.918166	0.644506	6.98674e-25	1.37605e-08	4.39641e-05	TRUE	TRUE	TRUE	up.early	981	1010	872	1539	2523	1806	2989	3428	3038	-1.17926	0.100172	1.07909	10.1183	11.0061	11.6853
chr14	67581955	67600286	18332	-	PIGH	protein_coding	ENSG00000100564	ENSG00000100564.9	261.691	0.432059	0.329039	0.0631677	0.00997977	0.0439346	0.775432	TRUE	FALSE	FALSE	up.early	173	222	240	255	340	279	249	310	301	-1.24013	0.442162	0.797971	8.44823	8.71427	8.77054
chr14	77320996	77331597	10602	+	GSTZ1	protein_coding	ENSG00000100577	ENSG00000100577.19	947.863	-0.222419	-0.690553	0.408662	0.305104	0.00050116	0.0351801	FALSE	TRUE	FALSE	down.early	939	1314	1289	822	717	645	959	1136	678	0.888627	-1.0402	0.151568	10.3821	9.68729	10.1166
chr14	77376689	77391497	14809	+	SAMD15	protein_coding	ENSG00000100583	ENSG00000100583.4	19.4916	-1.25407	0.786778	-2.88589	0.00874704	0.0314099	1.26867e-06	TRUE	FALSE	TRUE	down.late	15	19	16	25	49	28	2	6	6	-0.04612	1.12893	-1.08281	6.92184	7.27251	6.61246
chr14	59188646	59371405	182760	+	DAAM1	protein_coding	ENSG00000100592	ENSG00000100592.16	1227.99	-0.362757	-1.5719	1.12457	0.0758337	1.98749e-14	4.61143e-08	FALSE	TRUE	TRUE	down.early	1341	1466	1750	499	846	736	1297	1338	1240	0.911941	-1.23548	0.323542	10.919	9.47472	10.5233
chr14	77505997	77616637	110641	-	SPTLC2	protein_coding	ENSG00000100596	ENSG00000100596.7	2700.26	-0.402695	-0.547688	0.133615	0.0172635	0.000762697	0.489529	FALSE	TRUE	FALSE	down.early	3027	3572	4178	1750	3008	1952	2093	2911	2202	1.11837	-0.813347	-0.305027	11.7928	11.1998	11.3559
chr14	92513781	92688994	175214	+	RIN3	protein_coding	ENSG00000100599	ENSG00000100599.16	947.013	-0.806826	-0.106279	-0.660548	2.79174e-08	0.550414	5.01384e-06	TRUE	FALSE	TRUE	down.late	990	1184	1237	972	1266	1040	529	636	719	0.799294	0.470865	-1.27016	10.3466	10.23	9.61151
chr14	92703807	92748679	44873	-	LGMN	protein_coding	ENSG00000100600	ENSG00000100600.15	1530.89	1.59377	0.216299	1.261	6.67529e-11	0.343219	3.13373e-07	TRUE	FALSE	TRUE	up.late	544	1035	1154	1268	996	871	2592	2994	2099	-0.798295	-0.4272	1.2255	9.93457	10.2135	11.4555
chr14	77672404	77708023	35620	-	ALKBH1	protein_coding	ENSG00000100601	ENSG00000100601.10	360.11	0.460821	0.170158	0.235312	0.00726189	0.35372	0.1796	TRUE	FALSE	FALSE	up.early	245	324	335	317	510	405	297	431	403	-0.942424	-0.103954	1.04638	8.79047	8.94618	9.15979
chr14	60709539	60724351	14813	-	SIX4	protein_coding	ENSG00000100625	ENSG00000100625.9	1161.86	1.04881	0.292021	0.671763	3.58778e-11	0.0706152	1.86057e-05	TRUE	FALSE	TRUE	up.late	664	808	1014	716	1491	1090	1424	1775	1450	-0.943295	-0.276355	1.21965	9.86911	10.1696	10.8436
chr14	93934166	93976739	42574	-	ASB2	protein_coding	ENSG00000100628	ENSG00000100628.12	3.6549	4.15704	0.242429	1.59378	0.0012343	0.502095	0.0304344	TRUE	FALSE	FALSE	up.late	0	0	0	1	0	1	7	12	13	-0.868264	-0.395803	1.26407	6.28361	6.39819	6.80075
chr14	61695513	61748259	52747	+	HIF1A	protein_coding	ENSG00000100644	ENSG00000100644.17	10124.9	0.464909	1.50843	-0.972099	0.00579888	1.55906e-19	5.2898e-09	TRUE	TRUE	TRUE	up.early	4510	5514	7250	11267	17949	19174	8226	8265	8931	-0.979878	1.22287	-0.242995	12.5063	14.0143	13.0108
chr14	69611596	69715144	103549	+	SUSD6	protein_coding	ENSG00000100647	ENSG00000100647.8	1510.38	0.217959	-0.60261	0.85867	0.177386	4.13775e-05	5.26636e-09	FALSE	TRUE	TRUE	up.late	1423	1644	1765	1004	1279	891	1563	2240	1777	0.325596	-1.23136	0.905765	10.7802	10.1842	11.0024
chr14	70907405	71115382	207978	+	PCNX1	protein_coding	ENSG00000100731	ENSG00000100731.16	3359.12	0.5035	0.625393	-0.107023	0.0153222	0.00200256	0.658162	FALSE	TRUE	FALSE	up.early	1856	2561	2899	3088	4513	3724	3581	4494	3407	-1.05806	0.676927	0.381134	11.3169	11.9949	11.8793
chr14	96256210	96268967	12758	+	BDKRB1	protein_coding	ENSG00000100739	ENSG00000100739.11	52.0924	8.60915	4.51555	4.0364	1.05151e-13	0.000100337	1.59272e-17	TRUE	TRUE	TRUE	up.late	0	0	0	6	13	8	135	205	93	-0.916129	-0.358239	1.27437	6.28361	6.7515	8.12072
chr14	73237497	73274640	37144	+	PAPLN	protein_coding	ENSG00000100767	ENSG00000100767.17	51.168	-0.241502	2.72777	-3.2117	0.497909	2.04589e-10	2.25019e-13	FALSE	TRUE	TRUE	down.late	7	20	20	160	101	117	13	11	16	-0.569931	1.28569	-0.71576	6.93683	7.98534	6.85443
chr14	90847861	91060641	212781	-	RPS6KA5	protein_coding	ENSG00000100784	ENSG00000100784.12	189.894	2.91312	1.56099	1.20895	1.3429e-25	3.09211e-08	1.32245e-06	TRUE	TRUE	TRUE	up.early	41	33	38	114	274	158	359	442	420	-1.10307	-0.0577929	1.16087	7.38593	8.13535	9.00906
chr14	91457611	91510554	52944	-	PPP4R3A	protein_coding	ENSG00000100796	ENSG00000100796.17	2309.39	-0.306798	0.101944	-0.409712	0.00866721	0.468362	0.00026348	TRUE	FALSE	TRUE	down.late	1977	2310	2644	2104	3414	2711	1663	1983	2222	0.335027	0.904873	-1.2399	11.3197	11.4303	11.0138
chr14	23058564	23095614	37051	-	ACIN1	protein_coding	ENSG00000100813	ENSG00000100813.14	6640.46	-0.188432	0.191723	-0.389572	0.201981	0.182744	0.00329783	FALSE	FALSE	TRUE	down.late	5445	6914	7392	6782	9280	7300	4915	6558	5570	-0.0195191	1.02268	-1.00317	12.7125	12.9333	12.5041
chr14	20311368	20333312	21945	-	CCNB1IP1	protein_coding	ENSG00000100814	ENSG00000100814.18	872.781	0.805917	0.437713	0.26513	1.97621e-05	0.0179101	0.165935	TRUE	FALSE	FALSE	up.early	519	582	705	658	1110	949	1077	1409	920	-1.0763	0.121983	0.954319	9.5593	10.0011	10.3079
chr14	20455191	20457772	2582	+	APEX1	protein_coding	ENSG00000100823	ENSG00000100823.12	4936.11	0.00206395	0.388647	-0.387868	0.992423	0.000551447	0.000608521	FALSE	TRUE	TRUE	down.late	3511	4971	4791	6061	6996	5266	3981	4552	4666	-0.640699	1.27425	-0.633547	12.1613	12.5728	12.1629
chr14	23630115	23645639	15525	+	DHRS2	protein_coding	ENSG00000100867	ENSG00000100867.15	72.6714	2.17297	0.723407	1.05842	5.41559e-10	0.0160993	0.000741395	TRUE	FALSE	TRUE	up.late	13	31	45	70	53	51	126	120	129	-1.00304	-0.176774	1.17981	7.1107	7.46954	8.0587
chr14	24143362	24147570	4209	-	PSME2	protein_coding	ENSG00000100911	ENSG00000100911.16	2993.3	-0.16388	-0.329395	0.164338	0.251175	0.00931414	0.251162	FALSE	TRUE	FALSE	down.early	2833	3648	3586	2393	3057	2606	2839	3386	2663	1.0158	-1.01819	0.00239613	11.7882	11.4324	11.6109
chr14	24189149	24195687	6539	-	TM9SF1	protein_coding	ENSG00000100926	ENSG00000100926.15	2142.26	-0.44648	0.160475	-0.618987	0.00054377	0.263549	7.24156e-07	TRUE	FALSE	TRUE	down.late	1680	2527	2495	2384	2938	2364	1456	1923	1619	0.302923	0.925105	-1.22803	11.2268	11.4058	10.7863
chr14	24365673	24379604	13932	+	NFATC4	protein_coding	ENSG00000100968	ENSG00000100968.14	79.377	-3.04322	-1.81164	-0.419492	3.11904e-07	0.000752086	0.216899	TRUE	TRUE	FALSE	down.early	90	214	226	31	33	22	16	28	13	1.20527	-0.360123	-0.84515	8.28755	7.25977	6.94132
chr20	34928432	34956027	27596	-	GSS	protein_coding	ENSG00000100983	ENSG00000100983.12	4204.15	0.138706	-0.42614	0.584593	0.429749	0.00397745	6.81342e-05	FALSE	TRUE	TRUE	up.late	3385	5194	4880	3308	3464	2964	4801	5807	4163	0.344193	-1.17902	0.834828	12.1676	11.6954	12.3197
chr20	46008908	46016561	7654	+	MMP9	protein_coding	ENSG00000100985	ENSG00000100985.7	55.7508	-2.86709	-1.63228	-0.707454	8.71289e-11	4.00945e-05	0.0394929	TRUE	TRUE	FALSE	down.early	122	87	140	34	36	31	13	26	6	1.21072	-0.283921	-0.926803	7.95552	7.20722	6.88536
chr20	35002404	35092807	90404	-	TRPC4AP	protein_coding	ENSG00000100991	ENSG00000100991.12	4634.52	-0.438816	-0.0922933	-0.31956	0.000370662	0.55315	0.0104177	TRUE	FALSE	FALSE	down.late	4173	5892	5678	5227	5146	4465	3522	4138	3666	0.856069	0.351617	-1.20769	12.3979	12.2878	11.9476
chr20	25248085	25298012	49928	+	PYGB	protein_coding	ENSG00000100994	ENSG00000100994.12	93908.3	0.0768924	-0.434197	0.526119	0.753133	0.0209338	0.00514538	FALSE	FALSE	TRUE	up.late	76746	116058	115171	77751	68982	67201	111686	137226	77312	0.434516	-1.04547	0.610958	16.6415	16.0911	16.7071
chr20	25294742	25390835	96094	-	ABHD12	protein_coding	ENSG00000100997	ENSG00000100997.20	1599.06	-0.415886	-0.61996	0.188845	0.000380939	5.79849e-08	0.143961	TRUE	TRUE	FALSE	down.early	1472	2292	2249	1224	1565	1179	1397	1670	1443	1.23999	-0.979733	-0.260261	11.0854	10.4875	10.6813
chr20	35172072	35216240	44169	+	PROCR	protein_coding	ENSG00000101000	ENSG00000101000.6	1318.2	2.56649	2.24919	0.23342	1.71817e-37	5.75622e-29	0.238864	TRUE	TRUE	FALSE	up.early	211	318	467	1432	1732	1808	2055	2311	1691	-1.3044	0.515829	0.788576	8.87476	10.7816	11.0673
chr20	25452697	25585531	132835	-	NINL	protein_coding	ENSG00000101004	ENSG00000101004.15	97.1788	-4.15881	-2.08234	-0.542589	1.32349e-06	0.00293752	0.173973	TRUE	TRUE	FALSE	down.early	163	293	293	24	10	19	11	12	15	1.22531	-0.442443	-0.78287	8.56146	7.11066	6.81452
chr20	46118278	46129863	11586	+	CD40	protein_coding	ENSG00000101017	ENSG00000101017.14	2.73706	-2.74194	-1.05556	-0.134502	0.00975816	0.0656761	0.738618	TRUE	FALSE	FALSE	down.early	6	9	12	0	0	1	0	0	0	1.22	-0.435322	-0.784679	6.72368	6.3603	6.28361
chr20	47209214	47356889	147676	-	ZMYND8	protein_coding	ENSG00000101040	ENSG00000101040.19	5676.41	-0.62549	0.290982	-0.977023	2.13371e-05	0.0513644	3.06967e-11	TRUE	FALSE	TRUE	down.late	4224	5896	7383	6161	8818	7515	3232	4248	3973	0.223677	0.97894	-1.20262	12.5499	12.8914	11.9049
chr20	43590937	43647299	56363	+	IFT52	protein_coding	ENSG00000101052	ENSG00000101052.13	848.568	-0.437961	-0.125255	-0.281533	0.000537591	0.398633	0.0304629	TRUE	FALSE	FALSE	down.late	764	992	1121	913	978	846	656	753	660	0.958299	0.259957	-1.21826	10.1274	10.0004	9.7315
chr20	44355700	44434596	78897	+	HNF4A	protein_coding	ENSG00000101076	ENSG00000101076.17	6.55467	-1.47341	0.0993985	-1.97028	0.0212759	0.784662	0.00841692	FALSE	FALSE	TRUE	down.late	6	6	11	4	9	13	1	3	1	0.429238	0.738131	-1.16737	6.74091	6.79566	6.45787
chr20	36651766	36746090	94325	-	NDRG3	protein_coding	ENSG00000101079	ENSG00000101079.21	1639.58	-0.743359	-0.519172	-0.175091	1.75911e-07	0.000261241	0.279008	TRUE	TRUE	FALSE	down.early	1858	2168	2608	1161	1808	1444	1045	1400	1398	1.22396	-0.328978	-0.894981	11.1888	10.6579	10.4643
chr20	51386957	51562831	175875	-	NFATC2	protein_coding	ENSG00000101096	ENSG00000101096.20	73.3608	-2.27361	-1.49829	-0.469968	2.32516e-13	6.0784e-07	0.0766398	TRUE	TRUE	FALSE	down.early	135	157	172	42	42	34	27	38	29	1.26801	-0.362986	-0.905022	8.11743	7.38068	7.13584
chr20	44910060	44959035	48976	+	PABPC1L	protein_coding	ENSG00000101104	ENSG00000101104.13	438.256	0.681069	0.107913	0.495544	0.00073428	0.64223	0.0108623	TRUE	FALSE	FALSE	up.late	264	396	370	347	509	336	412	634	713	-0.739335	-0.38288	1.12221	8.92551	9.03673	9.50636
chr20	54208087	54228052	19966	+	PFDN4	protein_coding	ENSG00000101132	ENSG00000101132.10	952.168	0.745926	0.063408	0.637518	2.85e-05	0.784662	0.000282626	TRUE	FALSE	TRUE	up.late	603	752	910	619	949	836	1520	1281	1131	-0.694168	-0.510082	1.20425	9.80542	9.87334	10.5059
chr20	57168753	57266641	97889	-	BMP7	protein_coding	ENSG00000101144	ENSG00000101144.13	147.361	8.14313	-0.0774059	8.25943	1.02165e-15	0.838744	4.87225e-13	TRUE	FALSE	TRUE	up.late	0	1	2	0	0	2	417	533	429	-0.634573	-0.693468	1.32804	6.4435	6.36102	9.19203
chr20	57351223	57379211	27989	+	RAE1	protein_coding	ENSG00000101146	ENSG00000101146.13	1747.07	0.459251	0.310767	0.110527	0.000979129	0.0256621	0.516863	TRUE	FALSE	FALSE	up.early	1344	1511	1556	1634	2098	1680	1589	2113	2217	-1.16615	0.311079	0.855075	10.6131	10.9464	11.0692
chr20	63865228	63891545	26318	+	TPD52L2	protein_coding	ENSG00000101150	ENSG00000101150.18	7755.95	0.32589	-0.0797524	0.404063	0.00457926	0.590019	0.000288395	TRUE	FALSE	TRUE	up.late	5930	8335	7603	6926	8030	5977	8599	9587	9040	-0.402268	-0.84084	1.24311	12.8529	12.762	13.1938
chr20	63895126	63936031	40906	+	DNAJC5	protein_coding	ENSG00000101152	ENSG00000101152.11	8175.25	-0.269997	-0.458969	0.180968	0.0326698	0.000110434	0.176534	FALSE	TRUE	FALSE	down.early	7411	11049	10796	7322	7410	6252	7225	8449	8032	1.13712	-1.02173	-0.115394	13.2679	12.7747	12.9818
chr20	58995185	59007254	12070	-	CTSZ	protein_coding	ENSG00000101160	ENSG00000101160.14	5076.54	-1.06946	-0.461325	-0.551798	4.08591e-19	0.000141647	4.76697e-06	TRUE	TRUE	TRUE	down.early	5298	8164	8025	4868	5777	4465	3162	3528	2965	1.10628	0.059196	-1.16548	12.8047	12.3143	11.7408
chr20	59033145	59042809	9665	-	PRELID3B	protein_coding	ENSG00000101166	ENSG00000101166.16	4076.34	0.54236	-0.174545	0.754911	0.0023412	0.359299	1.70585e-05	TRUE	FALSE	TRUE	up.late	3174	3507	4513	2091	3888	3679	5047	5478	5290	-0.284343	-0.864292	1.14864	11.8785	11.6406	12.4665
chr20	62642503	62685785	43283	+	SLCO4A1	protein_coding	ENSG00000101187	ENSG00000101187.16	2277.94	1.06543	0.258391	0.72168	1.3159e-10	0.128846	1.16821e-05	TRUE	FALSE	TRUE	up.late	990	1908	1875	1765	2587	1610	3184	3566	3217	-0.916053	-0.302949	1.219	10.7125	11.0186	11.7785
chr20	62796473	62801729	5257	+	MRGBP	protein_coding	ENSG00000101189	ENSG00000101189.7	1649.12	0.669944	0.215846	0.409498	3.2863e-08	0.100117	0.000811993	TRUE	FALSE	TRUE	up.late	1053	1478	1353	1550	1790	1391	2082	2278	1925	-0.998359	-0.217571	1.21593	10.4993	10.7255	11.1409
chr20	63272785	63289790	17006	+	ARFGAP1	protein_coding	ENSG00000101199	ENSG00000101199.13	3306.51	0.426975	0.192463	0.185957	0.00842836	0.258051	0.28562	TRUE	FALSE	FALSE	up.early	2064	3251	3191	3857	3485	2875	3728	4334	3121	-0.935074	0.0116657	0.923408	11.5115	11.7414	11.9629
chr20	63488013	63499239	11227	-	EEF1A2	protein_coding	ENSG00000101210	ENSG00000101210.13	12.026	-4.64203	-5.63506	0.219396	1.80229e-05	5.43679e-06	0.566903	TRUE	TRUE	FALSE	down.early	49	47	41	1	0	0	0	1	1	1.27873	-0.766886	-0.511846	7.21592	6.33295	6.44303
chr20	63528001	63537376	9376	-	PTK6	protein_coding	ENSG00000101213	ENSG00000101213.7	1608.95	1.48295	-2.03428	3.58379	1.10493e-15	3.27464e-26	1.49008e-79	TRUE	TRUE	TRUE	up.late	827	1338	1371	268	366	235	3323	4153	2559	0.0609864	-1.17418	1.11319	10.3611	8.7085	11.769
chr20	3753508	3767781	14274	-	ADISSP	protein_coding	ENSG00000101220	ENSG00000101220.18	3570.42	0.773956	0.278133	0.41137	2.07843e-06	0.0935194	0.0112591	TRUE	FALSE	FALSE	up.early	1986	3331	2644	3737	4032	2568	4494	4856	4704	-0.980069	-0.139376	1.11944	11.4419	11.7644	12.2475
chr20	3786772	3806121	19350	+	CDC25B	protein_coding	ENSG00000101224	ENSG00000101224.17	10068.1	0.891706	0.631456	0.184877	1.08607e-06	0.00051255	0.351782	TRUE	TRUE	FALSE	up.early	4590	7785	7271	10502	13801	9377	12989	16221	9364	-1.17032	0.352123	0.8182	12.7059	13.4189	13.6372
chr20	3927309	4015558	88250	-	RNF24	protein_coding	ENSG00000101236	ENSG00000101236.17	2053.48	0.60079	0.826795	-0.186505	0.000168946	1.94545e-07	0.284308	TRUE	TRUE	FALSE	up.early	867	1530	1789	2955	2603	2716	1943	2575	1880	-1.20568	0.877643	0.328032	10.5903	11.405	11.19
chr20	4780023	4823608	43586	-	RASSF2	protein_coding	ENSG00000101265	ENSG00000101265.16	3.78267	2.83032	0.277425	1.12654	0.00636971	0.446044	0.0528507	TRUE	FALSE	FALSE	up.late	1	0	0	2	1	1	9	12	8	-0.915326	-0.30994	1.22527	6.34444	6.46933	6.78605
chr20	472498	543835	71338	-	CSNK2A1	protein_coding	ENSG00000101266	ENSG00000101266.19	8900.65	0.387356	-0.0971671	0.484197	0.0156318	0.614403	0.00159041	FALSE	FALSE	TRUE	up.late	6691	8182	9784	6113	9667	7796	8939	12196	11019	-0.338437	-0.784583	1.12302	13.0198	12.8896	13.4466
chr20	760080	776015	15936	-	SLC52A3	protein_coding	ENSG00000101276	ENSG00000101276.18	287.16	0.542668	-5.50693	6.11878	0.00415017	2.95512e-48	6.89706e-60	TRUE	TRUE	TRUE	up.late	313	344	394	11	8	1	508	662	476	0.471699	-1.31016	0.838465	8.90896	6.67392	9.36901
chr20	869900	916334	46435	-	ANGPT4	protein_coding	ENSG00000101280	ENSG00000101280.8	5.78849	2.90283	0.120642	2.0604	0.00425565	0.745838	0.0106806	TRUE	FALSE	FALSE	up.late	2	0	0	2	2	0	15	23	8	-0.710458	-0.482175	1.19263	6.36929	6.43359	6.90528
chr20	5126879	5197887	71009	+	CDS2	protein_coding	ENSG00000101290	ENSG00000101290.14	3998.11	-0.168335	-0.568081	0.383938	0.176197	2.01724e-07	0.000572329	FALSE	TRUE	TRUE	down.early	3652	5335	5928	3086	3785	3214	3236	3959	4088	0.957027	-1.24147	0.284444	12.25	11.6736	12.0736
chr20	1266280	1309328	43049	+	SNPH	protein_coding	ENSG00000101298	ENSG00000101298.15	216.59	0.576749	1.20743	-0.457776	0.0135827	6.06688e-07	0.0343708	FALSE	TRUE	FALSE	up.early	110	103	156	379	298	282	194	225	209	-1.06504	1.05003	0.0150154	8.01458	8.82484	8.42834
chr20	18507520	18561415	53896	+	SEC23B	protein_coding	ENSG00000101310	ENSG00000101310.17	4280.2	0.253267	-0.414383	0.683979	0.0156442	2.96065e-05	1.89913e-12	FALSE	TRUE	TRUE	up.late	3688	4500	4897	2787	4191	3212	4541	5562	5209	0.182733	-1.22804	1.04531	12.1424	11.7164	12.4028
chr20	6074845	6123030	48186	-	FERMT1	protein_coding	ENSG00000101311	ENSG00000101311.16	4701.44	1.43093	0.170407	1.20853	7.41054e-16	0.371817	1.71567e-11	TRUE	FALSE	TRUE	up.late	2782	2710	2840	2640	4526	3198	6822	9274	7666	-0.793219	-0.483373	1.27659	11.5377	11.7532	12.9777
chr20	9068763	9481242	412480	+	PLCB4	protein_coding	ENSG00000101333	ENSG00000101333.17	218.193	-0.835844	-0.43413	-0.230748	0.00140633	0.0707687	0.356224	TRUE	FALSE	FALSE	down.early	279	303	429	115	246	186	148	136	164	1.04642	-0.185773	-0.860648	8.80366	8.37607	8.14188
chr20	36541497	36551447	9951	+	MYL9	protein_coding	ENSG00000101335	ENSG00000101335.10	51.8563	-2.97888	0.102949	-3.27661	1.46044e-06	0.76154	1.67718e-07	TRUE	FALSE	TRUE	down.late	120	32	51	71	144	62	5	6	7	0.389476	0.734728	-1.1242	7.50261	7.68162	6.71776
chr20	36890229	36951843	61615	-	SAMHD1	protein_coding	ENSG00000101347	ENSG00000101347.10	1048.89	-0.592716	-0.206973	-0.277346	0.00914359	0.356915	0.209552	TRUE	FALSE	FALSE	down.early	1208	1400	1352	959	1374	944	492	726	1078	0.828862	0.105629	-0.93449	10.5015	10.2275	9.83339
chr20	2658395	2664219	5825	-	IDH3B	protein_coding	ENSG00000101365	ENSG00000101365.21	3868.02	0.135078	-0.277825	0.421617	0.242753	0.00685073	2.25345e-05	FALSE	TRUE	TRUE	up.late	3108	4387	4486	3079	3732	3059	4240	4691	4198	0.260829	-1.24565	0.984822	12.0129	11.7214	12.153
chr20	10637684	10673999	36316	-	JAG1	protein_coding	ENSG00000101384	ENSG00000101384.12	9709.3	3.43058	1.01308	2.3889	1.58691e-224	1.59537e-20	3.49682e-111	TRUE	TRUE	TRUE	up.late	1777	2032	2361	3845	5387	3855	20856	27599	21957	-0.969032	-0.307273	1.2763	11.1363	12.1219	14.4805
chr20	33358839	33401561	42723	-	CDK5RAP1	protein_coding	ENSG00000101391	ENSG00000101391.21	1687.99	0.310023	-0.0934362	0.402103	0.0441708	0.614403	0.00607713	FALSE	FALSE	TRUE	up.late	1305	1864	1598	1574	1549	1276	1873	2178	2012	-0.314102	-0.807522	1.12162	10.7599	10.6492	11.0821
chr20	33407957	33443763	35807	-	SNTA1	protein_coding	ENSG00000101400	ENSG00000101400.6	280.781	0.100735	-1.5274	1.69133	0.739366	9.6067e-08	4.63959e-09	FALSE	TRUE	TRUE	up.late	225	447	387	125	100	113	433	475	236	0.537435	-1.2171	0.679661	8.9276	7.91625	9.00959
chr20	33702758	33720319	17562	-	PXMP4	protein_coding	ENSG00000101417	ENSG00000101417.12	447.383	-1.95783	-1.14367	-0.716732	3.01449e-32	9.83157e-13	1.58487e-05	TRUE	TRUE	TRUE	down.early	591	919	968	359	383	354	148	243	179	1.23212	-0.200407	-1.03171	9.87926	8.94126	8.39693
chr20	33811348	33854366	43019	+	CHMP4B	protein_coding	ENSG00000101421	ENSG00000101421.4	3991.96	0.0650904	-0.794256	0.868099	0.684895	3.57246e-11	3.94548e-13	FALSE	TRUE	TRUE	up.late	3478	5090	5240	2706	2891	2300	4726	5171	4461	0.570742	-1.30718	0.736442	12.2076	11.414	12.2776
chr20	38748460	38772520	24061	+	ACTR5	protein_coding	ENSG00000101442	ENSG00000101442.10	657.284	-0.735358	-0.581117	-0.121103	3.07367e-08	1.16785e-05	0.463014	TRUE	TRUE	FALSE	down.early	741	982	916	572	659	521	461	524	556	1.28848	-0.450371	-0.838105	10.0127	9.48869	9.37184
chr20	45469753	45481532	11780	+	WFDC2	protein_coding	ENSG00000101443	ENSG00000101443.18	1883.53	-9.65007	-6.25412	-3.38856	2.58258e-139	5.06601e-179	5.03867e-17	TRUE	TRUE	TRUE	down.early	3323	6793	7042	68	88	66	6	9	4	1.3156	-0.485526	-0.830075	12.4587	7.61692	6.69071
chr20	34280268	34311802	31535	-	AHCY	protein_coding	ENSG00000101444	ENSG00000101444.13	16384.6	1.08768	0.0345353	1.05245	3.12367e-18	0.855161	7.26667e-17	TRUE	FALSE	TRUE	up.late	9523	12566	12998	10850	14365	11574	26035	28363	21729	-0.692291	-0.619575	1.31187	13.5327	13.5727	14.6351
chr20	38805697	38923024	117328	+	PPP1R16B	protein_coding	ENSG00000101445	ENSG00000101445.10	294.601	-10.1438	-6.38034	-3.7913	1.24013e-19	2.93054e-87	0.000554111	TRUE	TRUE	TRUE	down.early	684	961	991	13	14	4	1	0	0	1.32346	-0.534499	-0.788956	9.99885	6.7815	6.34087
chr20	38926312	38953106	26795	+	FAM83D	protein_coding	ENSG00000101447	ENSG00000101447.15	3805.27	-0.132692	-0.548458	0.390375	0.505795	0.00101169	0.0197504	FALSE	TRUE	FALSE	down.early	4107	4946	4217	2377	4114	2556	3672	4339	3995	0.783649	-1.11815	0.334504	12.172	11.5626	12.0281
chr20	45540626	45547752	7127	-	EPPIN	protein_coding	ENSG00000101448	ENSG00000101448.14	10.2761	-1.22146	-3.24255	0.537613	0.022649	0.000277431	0.190991	FALSE	TRUE	FALSE	down.early	10	38	36	1	4	0	4	5	5	1.10788	-0.933068	-0.174816	7.04943	6.43882	6.66567
chr20	34546854	34560345	13492	+	MAP1LC3A	protein_coding	ENSG00000101460	ENSG00000101460.13	29.8412	-2.54282	-0.491601	-1.54873	1.20911e-07	0.096834	0.000793595	TRUE	FALSE	TRUE	down.early	45	53	60	41	26	23	7	9	7	1.05533	0.115071	-1.1704	7.43595	7.14275	6.74191
chr20	34560542	34698790	138249	-	PIGU	protein_coding	ENSG00000101464	ENSG00000101464.11	958.618	0.0119226	-0.527336	0.537683	0.953727	8.8258e-05	5.73583e-05	FALSE	TRUE	TRUE	up.late	831	1183	1218	615	924	680	974	1144	1116	0.615373	-1.27678	0.661404	10.2571	9.75643	10.2693
chr18	76357682	76495242	137561	-	ZNF516	protein_coding	ENSG00000101493	ENSG00000101493.11	1178.1	0.902242	-0.101509	1.08481	8.71995e-05	0.690975	5.7222e-06	TRUE	FALSE	TRUE	up.late	650	963	1081	851	1003	781	1666	1962	1341	-0.460501	-0.702506	1.16301	10.0217	9.88873	10.9138
chr18	80034389	80050651	16263	+	RBFA	protein_coding	ENSG00000101546	ENSG00000101546.13	1113.6	-0.713423	-0.366666	-0.293088	3.26954e-08	0.0048382	0.0308664	TRUE	TRUE	FALSE	down.early	1196	1594	1429	1030	1270	1004	768	834	925	1.16099	-0.0868877	-1.0741	10.6212	10.2514	9.95888
chr18	2537525	2571509	33985	-	METTL4	protein_coding	ENSG00000101574	ENSG00000101574.15	525.731	-0.503277	-1.11686	0.508283	0.0065053	2.02831e-09	0.00487941	TRUE	TRUE	TRUE	down.early	682	733	878	232	488	372	414	464	494	1.0922	-1.1	0.00779073	9.80244	8.86847	9.34044
chr18	2655726	2805017	149292	+	SMCHD1	protein_coding	ENSG00000101596	ENSG00000101596.16	3457.59	-0.37951	-0.59653	0.189309	0.040708	0.000784555	0.330139	FALSE	TRUE	FALSE	down.early	3521	4606	5185	1885	3720	3144	2891	3056	3365	1.05376	-0.856924	-0.196839	12.1445	11.4873	11.7143
chr18	3247481	3256236	8756	+	MYL12A	protein_coding	ENSG00000101608	ENSG00000101608.13	5412.86	-0.558722	-0.358945	-0.121164	0.00778505	0.0734193	0.610754	TRUE	FALSE	FALSE	down.early	6735	5996	7659	3553	6489	5277	4611	4888	3504	0.966584	-0.276777	-0.689807	12.7641	12.2935	12.1371
chr18	48919853	48952052	32200	-	SMAD7	protein_coding	ENSG00000101665	ENSG00000101665.9	471.922	0.567793	1.11644	-0.437954	0.0031699	8.19518e-09	0.0170857	TRUE	TRUE	FALSE	up.early	228	335	339	594	716	588	406	511	493	-1.10034	1.05786	0.042479	8.75982	9.65439	9.23352
chr18	49560699	49599185	38487	+	LIPG	protein_coding	ENSG00000101670	ENSG00000101670.12	2493.48	0.340218	-0.258783	0.630795	0.0405613	0.112903	5.85032e-05	FALSE	FALSE	TRUE	up.late	2156	2555	2813	1812	2619	1635	2558	3367	2877	-0.0552913	-1.01382	1.06911	11.3204	11.0092	11.6855
chr18	6941742	7117797	176056	-	LAMA1	protein_coding	ENSG00000101680	ENSG00000101680.15	109.494	2.28444	3.50783	-0.72879	4.19272e-06	6.17023e-12	0.0317078	TRUE	TRUE	FALSE	up.early	15	8	11	236	232	254	109	136	140	-1.11803	1.04086	0.0771672	7.02156	8.42663	7.79943
chr18	33851100	34224952	373853	-	NOL4	protein_coding	ENSG00000101746	ENSG00000101746.15	10.948	-4.16712	-3.31094	-0.159756	1.05179e-05	6.96293e-05	0.669582	TRUE	TRUE	FALSE	down.early	18	34	36	2	1	3	2	0	2	1.28049	-0.54626	-0.734231	7.15082	6.51218	6.44646
chr18	23453287	23486603	33317	+	RIOK3	protein_coding	ENSG00000101782	ENSG00000101782.15	2445.77	-0.324014	-0.906105	0.461392	0.1774	0.000134408	0.0366365	FALSE	TRUE	FALSE	down.early	2258	3300	4006	1550	1599	1754	2782	3410	1449	0.912692	-0.979751	0.0670594	11.7367	10.7577	11.2992
chrX	108044970	108079184	34215	+	VSIG1	protein_coding	ENSG00000101842	ENSG00000101842.14	14.2977	4.30003	4.1759	-0.000527989	6.81263e-05	8.73062e-05	1	TRUE	TRUE	FALSE	up.early	1	1	0	22	20	22	20	26	17	-1.30486	0.655287	0.649572	6.39646	7.02503	7.0232
chrX	7147237	7804358	657122	+	STS	protein_coding	ENSG00000101846	ENSG00000101846.8	1211.34	-1.36782	-1.70311	0.240613	8.32556e-13	1.46479e-18	0.219319	TRUE	TRUE	FALSE	down.early	1450	2467	2789	435	866	706	675	942	816	1.27443	-0.825763	-0.448665	11.1719	9.62506	9.9028
chrX	9463295	9741037	277743	+	TBL1X	protein_coding	ENSG00000101849	ENSG00000101849.17	254.606	3.14162	1.86034	1.17682	1.87518e-37	9.96335e-14	1.77063e-07	TRUE	TRUE	TRUE	up.early	48	52	65	179	326	207	382	520	457	-1.1509	0.0244834	1.12642	7.46678	8.42852	9.33016
chrX	10445310	10833654	388345	-	MID1	protein_coding	ENSG00000101871	ENSG00000101871.16	1395.85	-0.807168	-1.0945	0.184161	0.000365513	2.92129e-06	0.431454	TRUE	TRUE	FALSE	down.early	2022	2063	2406	640	1342	861	829	1096	1396	1.16097	-0.801452	-0.359518	11.1489	10.0466	10.2948
chrX	12791355	12824222	32868	+	PRPS2	protein_coding	ENSG00000101911	ENSG00000101911.13	2388.02	0.723505	0.365342	0.267457	4.55826e-05	0.0367541	0.141775	TRUE	FALSE	FALSE	up.early	1669	1656	1867	1754	3170	2430	2857	3359	2822	-1.04926	0.0765707	0.972688	10.8852	11.2984	11.6272
chrX	48590042	48608869	18828	+	WDR13	protein_coding	ENSG00000101940	ENSG00000101940.18	1945.88	-0.23547	0.329447	-0.607973	0.277662	0.0900234	0.00189506	FALSE	FALSE	TRUE	down.late	1401	2005	2080	2550	2656	2342	1514	1725	1225	-0.10543	0.971169	-0.865739	10.9561	11.3402	10.6848
chrX	38149336	38220924	71589	-	SRPX	protein_coding	ENSG00000101955	ENSG00000101955.15	715.669	1.56237	3.09263	-1.49506	2.64695e-25	7.54566e-99	2.08907e-27	TRUE	TRUE	TRUE	up.early	111	207	200	1420	1617	1486	468	588	466	-1.1226	1.18006	-0.0574593	8.25008	10.6581	9.36396
chrX	139581770	139708227	126458	-	MCF2	protein_coding	ENSG00000101977	ENSG00000101977.21	53.499	-4.9488	-0.372871	-4.31944	5.73766e-15	0.150471	1.22632e-11	TRUE	FALSE	TRUE	down.late	60	101	125	56	98	77	3	1	3	0.879245	0.40813	-1.28738	7.8033	7.53054	6.54888
chrX	153724856	153744755	19900	+	ABCD1	protein_coding	ENSG00000101986	ENSG00000101986.12	461.976	-1.56253	-0.481646	-0.926729	2.15859e-13	0.0138822	1.16223e-05	TRUE	FALSE	TRUE	down.early	599	834	910	595	448	503	185	233	135	1.03162	0.133602	-1.16522	9.72418	9.22759	8.50936
chrX	15464246	15556529	92284	+	BMX	protein_coding	ENSG00000102010	ENSG00000102010.15	8.3818	5.91451	2.37092	1.62607	3.2122e-06	0.00827269	0.00817972	TRUE	TRUE	TRUE	up.early	0	0	0	3	6	3	24	18	21	-1.08275	-0.112939	1.19569	6.28361	6.60008	7.02712
chrX	115561174	115650861	89688	+	PLS3	protein_coding	ENSG00000102024	ENSG00000102024.18	7565.84	-0.695265	-0.437495	-0.20695	2.85887e-07	0.00125793	0.165191	TRUE	TRUE	FALSE	down.early	8215	9728	10729	5741	8509	6910	5617	6216	6384	1.19319	-0.244183	-0.949012	13.2831	12.7964	12.5577
chrX	129446501	129523500	77000	-	SMARCA1	protein_coding	ENSG00000102038	ENSG00000102038.16	209.354	0.714318	1.66222	-0.68605	0.00583681	2.66455e-09	0.00548174	TRUE	TRUE	TRUE	up.early	78	104	124	313	353	369	205	241	108	-1.01548	1.11683	-0.101347	7.84685	8.9159	8.30516
chrX	64268081	64395452	127372	-	MTMR8	protein_coding	ENSG00000102043	ENSG00000102043.16	37.746	-2.94666	-0.988224	-1.52132	7.04712e-11	0.00289387	0.000522144	TRUE	TRUE	TRUE	down.early	51	82	86	30	30	40	7	8	10	1.15756	-0.0632953	-1.09426	7.63111	7.16801	6.77694
chrX	15235288	15270467	35180	-	ASB9	protein_coding	ENSG00000102048	ENSG00000102048.16	154.756	1.84332	-0.0922639	1.99483	5.06884e-14	0.731277	3.94004e-16	TRUE	FALSE	TRUE	up.late	89	78	76	71	110	72	232	315	279	-0.591447	-0.707724	1.29917	7.70453	7.63702	8.8022
chrX	130339888	130373361	33474	+	SLC25A14	protein_coding	ENSG00000102078	ENSG00000102078.16	212.276	-0.43054	0.130427	-0.572402	0.0203354	0.51797	0.00114845	FALSE	FALSE	TRUE	down.late	191	227	225	248	317	240	136	153	189	0.319369	0.896572	-1.21594	8.50498	8.62024	8.1984
chrX	48913182	48919024	5843	-	PIM2	protein_coding	ENSG00000102096	ENSG00000102096.9	588.001	-0.30628	0.163973	-0.48214	0.0717798	0.355051	0.00237617	FALSE	FALSE	TRUE	down.late	455	647	670	646	905	573	396	532	522	0.170527	0.920436	-1.09096	9.54523	9.71217	9.26441
chrX	18239313	18354688	115376	-	SCML2	protein_coding	ENSG00000102098	ENSG00000102098.19	120.758	1.06393	0.383636	0.444914	8.96692e-05	0.116026	0.064031	TRUE	FALSE	FALSE	up.early	55	74	81	74	180	106	150	186	210	-0.961501	-0.116587	1.07809	7.64304	7.90719	8.28068
chrX	48903180	48911958	8779	-	SLC35A2	protein_coding	ENSG00000102100	ENSG00000102100.16	1280.4	-0.586882	-0.747922	0.136776	0.000129113	9.27927e-07	0.449048	TRUE	TRUE	FALSE	down.early	1441	1893	1844	1170	1080	774	981	1255	1127	1.23226	-0.841894	-0.390367	10.88	10.1469	10.3065
chrX	154379273	154381523	2251	+	EMD	protein_coding	ENSG00000102119	ENSG00000102119.11	879.727	-8.47633	0.253389	-8.75762	6.1348e-50	0.145134	1.385e-53	TRUE	FALSE	TRUE	down.late	1129	1468	1541	1269	2184	1776	2	1	4	0.594284	0.734253	-1.32854	10.3691	10.6469	6.55383
chrX	77910739	78129295	218557	+	PGK1	protein_coding	ENSG00000102144	ENSG00000102144.15	23583.4	-0.536915	-0.139539	-0.344806	0.00057759	0.43266	0.0272581	TRUE	FALSE	FALSE	down.late	22281	32558	30105	22812	30037	23084	16315	19716	17169	0.850951	0.254116	-1.10507	14.7586	14.5831	14.1835
chrX	77825747	77895593	69847	-	MAGT1	protein_coding	ENSG00000102158	ENSG00000102158.20	3015.98	-0.411292	-0.268498	-0.10436	0.00608678	0.0729148	0.568707	TRUE	FALSE	FALSE	down.early	2610	4242	3893	3160	3236	2404	2303	2832	2677	1.088	-0.28876	-0.799236	11.8593	11.5492	11.4341
chrX	22032325	22251310	218986	+	PHEX	protein_coding	ENSG00000102174	ENSG00000102174.9	92.7741	-0.403053	0.293895	-0.806361	0.121872	0.211319	0.00177448	FALSE	FALSE	TRUE	down.late	63	89	129	119	114	135	63	78	50	-0.00570416	1.02716	-1.02146	7.7669	8.00263	7.53507
chrX	150766336	150898816	132481	-	CD99L2	protein_coding	ENSG00000102181	ENSG00000102181.21	1145.4	0.530266	1.83849	-1.27017	8.40284e-05	4.00712e-45	1.26307e-22	TRUE	TRUE	TRUE	up.early	420	607	684	2138	2189	2001	702	927	814	-0.959523	1.27321	-0.313686	9.47066	11.0955	9.94065
chr12	92770637	92929331	158695	-	EEA1	protein_coding	ENSG00000102189	ENSG00000102189.17	1339.02	-0.724418	-0.24216	-0.374781	0.000246234	0.220252	0.0523207	TRUE	FALSE	FALSE	down.early	1381	1616	2038	938	1810	1645	872	889	1010	0.912917	0.10841	-1.02133	10.8409	10.5396	10.1165
chrX	136532215	136556807	24593	+	VGLL1	protein_coding	ENSG00000102243	ENSG00000102243.13	116.054	-2.28257	-4.99557	2.56927	4.86477e-13	1.63304e-36	3.50328e-10	TRUE	TRUE	TRUE	down.early	240	238	272	4	12	14	48	48	59	1.22819	-1.02194	-0.206249	8.72413	6.74163	7.4603
chrX	47582408	47586789	4382	+	TIMP1	protein_coding	ENSG00000102265	ENSG00000102265.12	9105.94	1.12082	2.6365	-1.42511	9.09255e-09	1.88376e-40	9.77591e-13	TRUE	TRUE	TRUE	up.early	2117	3054	3366	18590	18944	17757	7062	7718	4435	-1.07768	1.18078	-0.103101	11.5402	14.1427	12.6633
chrX	87517409	87670050	152642	+	KLHL4	protein_coding	ENSG00000102271	ENSG00000102271.14	93.8798	0.830018	9.36707	-7.36934	0.118961	2.15382e-16	2.39045e-21	FALSE	TRUE	TRUE	down.late	0	0	0	226	239	341	1	0	3	-0.725029	1.31566	-0.590636	6.28361	8.69411	6.44236
chrX	54445454	54496234	50781	-	FGD1	protein_coding	ENSG00000102302	ENSG00000102302.8	1067.73	0.0976926	0.393229	-0.290258	0.539262	0.00203457	0.028165	FALSE	TRUE	FALSE	up.early	696	1125	991	1247	1484	1153	923	1107	976	-0.870527	1.2115	-0.34097	10.0762	10.4677	10.1758
chrX	48508962	48520814	11853	+	PORCN	protein_coding	ENSG00000102312	ENSG00000102312.23	833.999	0.417122	0.730032	-0.259429	0.0276755	7.34171e-05	0.167173	FALSE	TRUE	FALSE	up.early	437	726	670	1168	1113	897	801	1081	670	-1.0597	0.971544	0.0881607	9.54597	10.2364	9.93612
chrX	48574449	48581162	6714	+	RBM3	protein_coding	ENSG00000102317	ENSG00000102317.18	6568.16	-1.18387	-0.0386787	-1.14507	4.63369e-24	0.827217	3.16375e-22	TRUE	FALSE	TRUE	down.late	7011	8296	8723	7306	8992	7810	3122	3878	3885	0.697168	0.623626	-1.32079	13.0265	12.9837	11.8523
chrX	56232356	56291531	59176	+	KLF8	protein_coding	ENSG00000102349	ENSG00000102349.18	642.749	-0.596886	-0.408163	-0.110116	0.00514802	0.0449512	0.656463	TRUE	FALSE	FALSE	down.early	621	956	1147	443	671	674	435	602	383	1.03978	-0.333464	-0.706313	9.93618	9.48301	9.35997
chrX	100644195	100675788	31594	+	SRPX2	protein_coding	ENSG00000102359	ENSG00000102359.8	2025.52	0.460181	-0.850041	1.41397	0.0126604	3.4349e-06	3.2855e-14	FALSE	TRUE	TRUE	up.late	1448	2183	2328	1067	1315	1038	2741	3493	2509	0.191447	-1.18664	0.995188	11.0962	10.2549	11.5869
chr13	46334681	46438190	103510	-	RUBCNL	protein_coding	ENSG00000102445	ENSG00000102445.20	14.7122	6.87563	0.226517	5.70659	3.3515e-08	0.528832	2.55512e-08	TRUE	FALSE	TRUE	up.late	0	0	0	2	1	0	30	39	23	-0.749923	-0.546703	1.29663	6.28361	6.38691	7.32391
chr13	101053776	101416508	362733	-	NALCN	protein_coding	ENSG00000102452	ENSG00000102452.18	566.715	-2.64249	-1.6853	-0.864611	3.65542e-46	5.01553e-21	3.78757e-06	TRUE	TRUE	TRUE	down.early	1069	1300	1464	315	432	395	139	141	188	1.25892	-0.279901	-0.979016	10.3574	8.95318	8.3152
chr13	79481124	79556075	74952	+	NDFIP2	protein_coding	ENSG00000102471	ENSG00000102471.14	2153.76	-0.0475229	-0.517436	0.460538	0.80373	0.000199496	0.000932571	FALSE	TRUE	TRUE	up.late	1985	2434	2873	1339	1989	1878	2060	2414	2456	0.71043	-1.23106	0.520628	11.347	10.8065	11.2942
chr13	48975912	49209779	233868	+	FNDC3A	protein_coding	ENSG00000102531	ENSG00000102531.16	2380.84	-0.67057	-0.103992	-0.504592	0.000170725	0.62429	0.00382883	TRUE	FALSE	TRUE	down.late	2267	2773	3530	1819	3300	2840	1562	1902	1655	0.775133	0.35538	-1.13051	11.5475	11.3961	10.8602
chr19	11574660	11579008	4349	-	ACP5	protein_coding	ENSG00000102575	ENSG00000102575.13	6.27892	4.42261	-0.00451212	4.32213	0.00049577	0.993235	0.000579908	TRUE	FALSE	TRUE	up.late	1	0	0	0	1	0	14	21	15	-0.621019	-0.651026	1.27205	6.3426	6.33277	6.96288
chr13	111114559	111305737	191179	+	ARHGEF7	protein_coding	ENSG00000102606	ENSG00000102606.18	2106.4	-0.338936	-0.17204	-0.144417	0.00358736	0.171412	0.275527	TRUE	FALSE	FALSE	down.early	1980	2511	2790	2029	2499	2043	1474	1911	1912	1.11522	-0.0612241	-1.054	11.3079	11.1248	10.9703
chr13	40729128	40771190	42063	-	MRPS31	protein_coding	ENSG00000102738	ENSG00000102738.8	680.328	0.398186	0.349871	0.0244073	0.00469554	0.011202	0.911985	TRUE	FALSE	FALSE	up.early	503	553	578	669	859	724	704	804	751	-1.24016	0.550064	0.6901	9.45574	9.78609	9.81193
chr13	40789412	40812460	23049	+	SLC25A15	protein_coding	ENSG00000102743	ENSG00000102743.15	1499.75	0.4616	0.567464	-0.100663	0.00104906	3.70964e-05	0.565271	TRUE	TRUE	FALSE	up.early	979	1254	1238	1803	2189	1395	1358	1648	1730	-1.22619	0.811412	0.414778	10.3338	10.8882	10.7803
chr13	42040036	42256578	216543	+	DGKH	protein_coding	ENSG00000102780	ENSG00000102780.17	2341.03	-0.0436589	-0.63408	0.572935	0.849778	0.000170021	0.000593239	FALSE	TRUE	TRUE	up.late	2367	2943	3399	1298	2093	1934	2103	2473	2491	0.665986	-1.19723	0.531248	11.4905	10.8086	11.4412
chr13	30202630	30307551	104922	-	KATNAL1	protein_coding	ENSG00000102781	ENSG00000102781.14	790.531	-1.0796	0.146233	-1.31576	4.24125e-08	0.489107	8.45124e-11	TRUE	FALSE	TRUE	down.late	703	987	996	775	1244	1015	367	401	553	0.472915	0.78607	-1.25899	10.0518	10.2252	9.09268
chr13	51354077	51454264	100188	-	INTS6	protein_coding	ENSG00000102786	ENSG00000102786.15	2360.84	-0.532176	0.145871	-0.707372	0.0051303	0.480115	0.00014378	TRUE	FALSE	TRUE	down.late	1909	2473	2893	2199	2927	3309	1665	1945	1748	0.352075	0.770717	-1.12279	11.3862	11.5481	10.8158
chr13	51767993	51804162	36170	-	DHRS12	protein_coding	ENSG00000102796	ENSG00000102796.11	105.227	-0.966619	-2.00678	0.709336	0.000517394	1.3325e-10	0.0104579	TRUE	TRUE	FALSE	down.early	162	184	170	42	52	49	94	98	55	1.1771	-0.989423	-0.187677	8.33775	7.33742	7.7076
chr13	44432143	44577147	145005	-	TSC22D1	protein_coding	ENSG00000102804	ENSG00000102804.15	5638.04	1.28339	1.16386	0.0903985	8.89726e-14	1.88633e-11	0.677525	TRUE	TRUE	FALSE	up.early	2376	2779	3895	5657	8533	6682	6827	8150	5830	-1.28011	0.554122	0.725986	11.5617	12.7424	12.853
chr13	76990660	77019143	28484	+	CLN5	protein_coding	ENSG00000102805	ENSG00000102805.16	1023.8	-0.679428	-0.0643524	-0.566896	0.000133849	0.778701	0.00114632	TRUE	FALSE	TRUE	down.late	950	1232	1405	1037	1212	1139	644	800	764	0.696959	0.480524	-1.17748	10.4	10.3262	9.76119
chr13	53028813	53052057	23245	+	OLFM4	protein_coding	ENSG00000102837	ENSG00000102837.7	11.8493	6.60286	0	6.4906	1.67256e-07	1	1.8614e-07	TRUE	FALSE	TRUE	up.late	0	0	0	0	0	0	24	42	41	-0.661966	-0.661966	1.32393	6.28361	6.28361	7.23542
chr16	760734	768865	8132	+	MSLN	protein_coding	ENSG00000102854	ENSG00000102854.16	3794.49	-9.36983	-2.72122	-6.61846	2.48888e-180	1.41512e-32	5.12774e-90	TRUE	TRUE	TRUE	down.early	7405	12965	12186	2093	1455	1333	15	11	11	1.08371	0.124695	-1.20841	13.2897	10.6229	6.91596
chr16	4616493	4690974	74482	+	MGRN1	protein_coding	ENSG00000102858	ENSG00000102858.13	3476.48	-0.853754	-0.481429	-0.304084	4.7954e-09	0.000973319	0.0450096	TRUE	TRUE	FALSE	down.early	3562	5076	5184	3502	3537	2993	2236	2754	2485	1.17314	-0.170325	-1.00281	12.2416	11.7096	11.3799
chr16	30778456	30787205	8750	-	ZNF629	protein_coding	ENSG00000102870	ENSG00000102870.6	2173.94	-0.882251	-0.134825	-0.713855	1.63366e-12	0.364786	1.15993e-08	TRUE	FALSE	TRUE	down.late	2101	2866	3120	2306	2657	2400	1169	1595	1501	0.831088	0.457441	-1.28853	11.4724	11.3218	10.618
chr16	67154185	67159909	5725	-	TRADD	protein_coding	ENSG00000102871	ENSG00000102871.16	833.942	-0.674236	-0.558742	-0.0525325	0.00422739	0.0138962	0.860625	TRUE	FALSE	FALSE	down.early	763	1557	1189	940	660	535	705	698	527	1.06013	-0.479403	-0.580725	10.3298	9.68569	9.6433
chr16	67164681	67169945	5265	+	HSF4	protein_coding	ENSG00000102878	ENSG00000102878.17	172.526	-1.62187	-1.04139	-0.365999	4.02608e-10	3.33617e-05	0.114249	TRUE	TRUE	FALSE	down.early	159	318	318	153	128	111	89	130	95	1.20283	-0.315225	-0.887601	8.75266	8.03998	7.77127
chr16	30182827	30189076	6250	+	CORO1A	protein_coding	ENSG00000102879	ENSG00000102879.16	1457.66	-1.88544	-3.60099	1.66942	4.56799e-28	6.35686e-93	1.39029e-20	TRUE	TRUE	TRUE	down.early	2613	3919	3224	253	339	224	884	1003	680	1.19996	-1.08806	-0.111897	11.7286	8.65959	9.96895
chr16	30114105	30123506	9402	-	MAPK3	protein_coding	ENSG00000102882	ENSG00000102882.12	1604.06	-1.59688	-1.4409	-0.107525	6.03827e-15	2.46626e-12	0.64977	TRUE	TRUE	FALSE	down.early	2248	3293	3323	891	956	1049	963	1197	691	1.27971	-0.547316	-0.732393	11.5628	10.1781	10.0378
chr16	30104810	30113537	8728	-	GDPD3	protein_coding	ENSG00000102886	ENSG00000102886.15	1110.07	-3.65419	-4.88748	1.19216	1.76086e-120	8.71356e-185	3.17535e-11	TRUE	TRUE	TRUE	down.early	2261	3557	3176	89	129	88	233	267	211	1.31039	-0.860151	-0.450242	11.6175	7.83736	8.55124
chr16	67199111	67204029	4919	+	ELMO3	protein_coding	ENSG00000102890	ENSG00000102890.16	2300.67	-0.876762	-1.18153	0.173103	0.00064157	1.12929e-05	0.499261	TRUE	TRUE	FALSE	down.early	2572	4721	3759	1904	1266	1271	2062	2176	1079	1.13249	-0.743079	-0.389408	11.8824	10.6259	10.8628
chr16	47461123	47701523	240401	+	PHKB	protein_coding	ENSG00000102893	ENSG00000102893.16	3601.93	-1.25266	-1.01784	-0.193608	9.17519e-20	1.88714e-13	0.210243	TRUE	TRUE	FALSE	down.early	4533	5667	6787	2296	3432	2854	2170	2592	2202	1.29251	-0.466609	-0.825905	12.517	11.4941	11.2852
chr16	20899868	20925006	25139	+	LYRM1	protein_coding	ENSG00000102897	ENSG00000102897.10	773.13	-0.505291	-0.522376	0.0316506	0.00389486	0.00216439	0.903212	TRUE	TRUE	FALSE	down.early	858	995	1114	550	812	658	689	774	529	1.16764	-0.631309	-0.536328	10.1581	9.64215	9.66939
chr16	67846923	67872567	25645	+	NUTF2	protein_coding	ENSG00000102898	ENSG00000102898.12	2390.11	-0.715488	-0.406884	-0.197542	0.000959665	0.0494808	0.377959	TRUE	FALSE	FALSE	down.early	3198	2721	3356	1456	3288	2496	1496	1820	1800	1.01231	-0.240922	-0.771391	11.6845	11.1543	10.9298
chr16	67828157	67847811	19655	-	CENPT	protein_coding	ENSG00000102901	ENSG00000102901.13	939.74	-0.594791	-0.237542	-0.307431	6.54614e-06	0.0845944	0.0243173	TRUE	FALSE	FALSE	down.early	857	1323	1220	943	1089	831	647	848	756	1.06756	0.0749042	-1.14247	10.3346	10.0898	9.78969
chr16	67806765	67832148	25384	+	TSNAXIP1	protein_coding	ENSG00000102904	ENSG00000102904.15	14.791	-0.754739	0.754877	-2.48167	0.0794418	0.0496664	0.000182358	FALSE	FALSE	TRUE	down.late	14	13	16	22	21	27	4	1	6	-0.117834	1.12603	-1.00819	6.82199	7.1487	6.58812
chr16	69565094	69704666	139573	+	NFAT5	protein_coding	ENSG00000102908	ENSG00000102908.22	3672.19	-0.684521	-0.971029	0.201842	0.00116245	6.17964e-06	0.355939	TRUE	TRUE	FALSE	down.early	4517	5068	6922	1709	3072	3013	2502	3453	3111	1.13071	-0.848638	-0.282068	12.4136	11.3658	11.6657
chr16	48244300	48363122	118823	+	LONP2	protein_coding	ENSG00000102910	ENSG00000102910.14	6202.02	-0.692531	-0.546815	-0.120927	4.44745e-10	9.22545e-07	0.380663	TRUE	TRUE	FALSE	down.early	6402	8789	9575	5605	6615	5199	4176	5424	4603	1.28522	-0.434656	-0.850564	13.0236	12.4561	12.3189
chr16	48538726	48620148	81423	-	N4BP1	protein_coding	ENSG00000102921	ENSG00000102921.8	1481.02	-0.789671	-0.854879	0.0487619	9.88641e-05	2.90188e-05	0.858492	TRUE	TRUE	FALSE	down.early	1827	2073	2491	978	1506	1251	830	1182	1174	1.18199	-0.66943	-0.512565	11.158	10.2869	10.3607
chr16	57245259	57253635	8377	+	ARL2BP	protein_coding	ENSG00000102931	ENSG00000102931.8	2226.71	-0.767108	0.0386423	-0.810913	5.31972e-06	0.868369	1.52356e-06	TRUE	FALSE	TRUE	down.late	2306	2399	2903	2165	3259	2794	1177	1516	1625	0.563536	0.672993	-1.23653	11.4044	11.4512	10.6348
chr16	57248547	57284672	36126	-	PLLP	protein_coding	ENSG00000102934	ENSG00000102934.10	37.4814	-0.921878	0.462128	-1.85923	0.00907273	0.103081	5.80081e-06	TRUE	FALSE	TRUE	down.late	27	41	41	66	54	67	14	21	9	0.0720089	1.0568	-1.12881	7.24318	7.52363	6.90122
chr16	57358783	57366189	7407	+	CCL22	protein_coding	ENSG00000102962	ENSG00000102962.5	17.6062	0.461604	-5.44494	6.48228	0.239369	1.32024e-05	2.13494e-07	FALSE	TRUE	TRUE	up.late	27	6	14	0	0	0	34	50	23	0.233381	-1.1763	0.942915	6.91389	6.28361	7.23113
chr16	67562467	67639177	76711	+	CTCF	protein_coding	ENSG00000102974	ENSG00000102974.16	2711.96	-0.388809	-0.180054	-0.172618	0.0063357	0.237267	0.269368	TRUE	FALSE	FALSE	down.early	2692	3228	3434	2331	3485	2453	1958	2436	2561	1.00228	-0.0206581	-0.981617	11.6767	11.4677	11.2714
chr16	57462660	57472009	9350	+	POLR2C	protein_coding	ENSG00000102978	ENSG00000102978.13	2669.95	-0.489993	-0.334563	-0.118884	0.000188618	0.0107279	0.455064	TRUE	FALSE	FALSE	down.early	2797	3326	3265	2300	3046	2314	2131	2418	2398	1.19344	-0.319954	-0.873486	11.7293	11.3692	11.2375
chr16	67660946	67662774	1829	+	PARD6A	protein_coding	ENSG00000102981	ENSG00000102981.10	133.29	-0.735029	-2.08776	1.15383	0.00274582	6.99482e-14	3.38429e-05	TRUE	TRUE	TRUE	down.early	172	274	235	59	36	57	130	117	118	1.09779	-1.14242	0.0446354	8.51029	7.40705	7.99164
chr16	58025754	58046901	21148	+	MMP15	protein_coding	ENSG00000102996	ENSG00000102996.5	633.565	-0.48636	-1.48597	0.904352	0.00798286	1.84183e-15	1.10655e-06	TRUE	TRUE	TRUE	down.early	644	1208	1034	380	331	267	570	697	643	1.01207	-1.19723	0.185163	10.0761	8.85949	9.62075
chr16	69424619	69466264	41646	+	CYB5B	protein_coding	ENSG00000103018	ENSG00000103018.17	4152.94	-0.749314	-0.50397	-0.18669	1.04e-06	0.000967731	0.27322	TRUE	TRUE	FALSE	down.early	4926	5953	6065	3156	4608	3632	2652	3109	3541	1.1907	-0.295137	-0.895558	12.4747	11.9185	11.6937
chr16	58231157	58283836	52680	+	CCDC113	protein_coding	ENSG00000103021	ENSG00000103021.9	182.865	0.934677	0.520213	0.185304	0.00477001	0.0730699	0.521903	TRUE	FALSE	FALSE	up.early	74	83	114	202	237	187	220	322	190	-0.910888	0.221209	0.689679	7.86863	8.35177	8.55169
chr16	1770286	1771730	1445	-	NME3	protein_coding	ENSG00000103024	ENSG00000103024.7	1392.06	-0.43698	-0.678926	0.184342	0.0890796	0.00691581	0.468758	FALSE	TRUE	FALSE	down.early	1315	2584	1923	1383	851	820	1438	1404	895	0.930714	-0.770439	-0.160275	10.9713	10.1496	10.4443
chr16	58665109	58684770	19662	-	SLC38A7	protein_coding	ENSG00000103042	ENSG00000103042.9	594.974	-1.17447	-0.0607149	-1.07677	1.32963e-05	0.834682	9.23261e-05	TRUE	FALSE	TRUE	down.late	666	693	775	516	851	693	225	297	501	0.668991	0.526419	-1.19541	9.83178	9.74915	8.75129
chr16	70687439	70801160	113722	-	VAC14	protein_coding	ENSG00000103043	ENSG00000103043.15	2301.69	-0.981454	-0.510362	-0.411227	2.52985e-14	8.27831e-05	0.00177827	TRUE	TRUE	TRUE	down.early	2620	3596	3202	2000	2498	2125	1374	1633	1704	1.16613	-0.0781026	-1.08803	11.6997	11.1732	10.7457
chr16	69105653	69118719	13067	+	HAS3	protein_coding	ENSG00000103044	ENSG00000103044.11	2695.15	7.41945	3.45672	3.95037	3.1273e-300	2.69831e-63	1.29906e-122	TRUE	TRUE	TRUE	up.late	40	49	64	353	533	493	6145	8632	6221	-1.02468	-0.22433	1.24901	7.3377	9.29768	12.9057
chr16	70480568	70523560	42993	-	COG4	protein_coding	ENSG00000103051	ENSG00000103051.20	3451.11	-0.844645	-0.61102	-0.194953	1.99873e-11	1.42597e-06	0.169342	TRUE	TRUE	FALSE	down.early	3840	5256	4955	3101	3427	2820	2469	2824	2393	1.26152	-0.362419	-0.899105	12.26	11.6261	11.4166
chr16	68264516	68301823	37308	+	SLC7A6	protein_coding	ENSG00000103064	ENSG00000103064.15	1927.92	-0.877958	-0.18693	-0.612458	3.40877e-07	0.309361	0.000320057	TRUE	FALSE	TRUE	down.late	2648	2605	2877	1814	2597	2112	815	1037	1496	0.872383	0.323637	-1.19602	11.3446	11.1091	10.4568
chr16	68229033	68238102	9070	-	ESRP2	protein_coding	ENSG00000103067	ENSG00000103067.14	3335.62	-1.0096	-1.23907	0.188713	3.47047e-15	9.21667e-22	0.195782	TRUE	TRUE	FALSE	down.early	4134	5952	5378	2072	2933	1879	2201	2898	2592	1.29833	-0.833358	-0.464971	12.4029	11.1895	11.3992
chr16	74712955	74774831	61877	-	FA2H	protein_coding	ENSG00000103089	ENSG00000103089.9	129.228	0.22503	-1.70273	2.09186	0.478895	5.32145e-06	3.35676e-08	FALSE	TRUE	TRUE	up.late	119	177	197	36	43	37	173	240	130	0.403011	-1.17807	0.775057	8.14485	7.31001	8.3413
chr16	77190835	77202398	11564	+	MON1B	protein_coding	ENSG00000103111	ENSG00000103111.15	3572.62	-0.798974	-0.888472	0.0677023	5.62015e-06	5.569e-07	0.774026	TRUE	TRUE	FALSE	down.early	4135	6079	5749	3045	3223	2421	2326	2905	2495	1.23279	-0.722776	-0.51001	12.3807	11.4452	11.547
chr16	80966448	81020270	53823	-	CMC2	protein_coding	ENSG00000103121	ENSG00000103121.9	1745.61	-0.611922	-0.928245	0.254532	0.000282867	3.88908e-08	0.146871	TRUE	TRUE	FALSE	down.early	2022	3096	2442	1302	1435	1037	1500	1519	1450	1.18564	-0.929773	-0.255862	11.3409	10.4325	10.7219
chr16	84271	138677	54407	-	NPRL3	protein_coding	ENSG00000103148	ENSG00000103148.17	1614.99	-0.321943	-0.398127	0.0819927	0.0356953	0.00625852	0.672504	FALSE	TRUE	FALSE	down.early	1466	2075	2066	1279	1795	1418	1222	1665	1601	1.13221	-0.764926	-0.367284	11.0258	10.6005	10.6896
chr16	83899115	83951445	52331	+	MLYCD	protein_coding	ENSG00000103150	ENSG00000103150.7	687.161	-0.711539	-0.599218	-0.076161	1.33269e-05	0.000217948	0.725912	TRUE	TRUE	FALSE	down.early	701	1059	1076	642	626	572	461	545	547	1.23921	-0.493331	-0.745879	10.0772	9.51195	9.42956
chr16	84122141	84145192	23052	-	HSDL1	protein_coding	ENSG00000103160	ENSG00000103160.12	570.127	-0.49155	-0.543016	0.0562648	0.00138566	0.000314516	0.793612	TRUE	TRUE	FALSE	down.early	583	745	810	399	645	451	449	566	508	1.24196	-0.727566	-0.514396	9.77581	9.28555	9.33861
chr16	84565596	84618078	52483	-	COTL1	protein_coding	ENSG00000103187	ENSG00000103187.8	27677.4	-0.0202396	-0.617521	0.590079	0.908639	1.57035e-07	4.48274e-07	FALSE	TRUE	TRUE	up.late	25386	36954	32853	19555	24856	17358	27456	33699	32405	0.678501	-1.29146	0.612957	14.9568	14.306	14.9352
chr16	84819985	84920768	100784	+	CRISPLD2	protein_coding	ENSG00000103196	ENSG00000103196.12	132.338	0.0210471	-1.58997	1.63099	0.949	1.02641e-08	6.62325e-09	FALSE	TRUE	TRUE	up.late	120	207	202	58	71	58	121	182	131	0.608278	-1.26924	0.660964	8.24815	7.44239	8.27076
chr16	2047967	2089491	41525	+	TSC2	protein_coding	ENSG00000103197	ENSG00000103197.18	3178.16	-0.68348	-0.38864	-0.198603	0.000613626	0.0439241	0.343888	TRUE	FALSE	FALSE	down.early	3235	4513	4794	3232	3381	3028	1960	2420	2166	1.05087	-0.23777	-0.813096	12.0634	11.5614	11.3373
chr16	396725	410367	13643	+	NME4	protein_coding	ENSG00000103202	ENSG00000103202.13	2468.43	-0.688666	-0.250066	-0.324585	0.00101976	0.226125	0.112698	TRUE	FALSE	FALSE	down.early	2470	3648	3247	2707	2696	2141	1972	1944	1374	0.911987	0.0482726	-0.960259	11.6778	11.3271	10.9177
chr16	16232506	16300806	68301	+	NOMO3	protein_coding	ENSG00000103226	ENSG00000103226.19	3047.88	-0.867224	-0.947215	0.0684363	1.58184e-15	4.50168e-18	0.660625	TRUE	TRUE	FALSE	down.early	3422	5062	5236	2120	2655	2005	2156	2634	2488	1.3197	-0.74149	-0.578206	12.1726	11.2453	11.3188
chr16	853634	981318	127685	-	LMF1	protein_coding	ENSG00000103227	ENSG00000103227.19	155.854	0.64287	-0.1581	0.934167	0.0305125	0.575953	0.00295116	FALSE	FALSE	TRUE	up.late	95	138	157	137	91	119	239	287	105	-0.277811	-0.748128	1.02594	8.02323	7.84225	8.52494
chr16	729760	741329	11570	-	CIAO3	protein_coding	ENSG00000103245	ENSG00000103245.14	1551.71	-1.51344	-0.977156	-0.457752	3.82092e-25	1.8897e-11	0.00180062	TRUE	TRUE	TRUE	down.early	1854	3015	2808	1410	1346	1158	793	857	870	1.24332	-0.255696	-0.98762	11.3887	10.4495	9.99087
chr16	86530178	86555235	25058	-	MTHFSD	protein_coding	ENSG00000103248	ENSG00000103248.19	590.131	-0.435351	-0.241533	-0.148694	0.00487983	0.121521	0.397068	TRUE	FALSE	FALSE	down.early	527	752	762	694	663	549	380	536	502	1.10544	-0.173951	-0.931484	9.7259	9.48233	9.33811
chr16	1444934	1475084	30151	-	CLCN7	protein_coding	ENSG00000103249	ENSG00000103249.18	2234.93	-0.765913	-0.441422	-0.269553	8.18405e-09	0.000934264	0.0563224	TRUE	TRUE	FALSE	down.early	2321	3224	3010	2329	2292	1909	1463	1739	1836	1.18887	-0.178366	-1.0105	11.5928	11.1238	10.8384
chr16	726936	735525	8590	+	HAGHL	protein_coding	ENSG00000103253	ENSG00000103253.19	1060.73	-0.920689	-1.0537	0.069072	0.00147381	0.000437822	0.828866	TRUE	TRUE	FALSE	down.early	1005	2123	1549	1035	577	577	957	854	607	1.09195	-0.667058	-0.424894	10.8217	9.67074	9.82919
chr16	715118	719655	4538	+	METRN	protein_coding	ENSG00000103260	ENSG00000103260.9	4746.44	-1.34806	-1.61892	0.158331	5.33922e-08	1.73048e-10	0.524615	TRUE	TRUE	FALSE	down.early	4985	12199	8234	3504	2648	2208	3493	3180	2402	1.22416	-0.752883	-0.471277	13.0384	11.4166	11.6476
chr16	87326987	87392142	65156	-	FBXO31	protein_coding	ENSG00000103264	ENSG00000103264.18	1486.58	-0.520611	-0.062275	-0.404188	0.00724118	0.797512	0.0308938	TRUE	FALSE	FALSE	down.late	1274	1828	1732	1760	1766	1413	1172	1350	1006	0.682631	0.366289	-1.04892	10.8637	10.7638	10.3167
chr16	680224	682870	2647	+	STUB1	protein_coding	ENSG00000103266	ENSG00000103266.11	3243.03	-0.506506	-0.400761	-0.0627613	0.00290677	0.0155316	0.783335	TRUE	FALSE	FALSE	down.early	3198	4999	4108	3364	3024	2488	2849	2904	2380	1.12051	-0.440299	-0.680208	12.038	11.5698	11.4978
chr16	1308880	1327018	18139	+	UBE2I	protein_coding	ENSG00000103275	ENSG00000103275.21	5117.81	-0.439587	-0.462433	0.0390478	0.013635	0.00700921	0.877206	FALSE	TRUE	FALSE	down.early	5404	6794	7131	3684	5584	4354	3762	4993	4467	1.08999	-0.652479	-0.437511	12.6803	12.1264	12.1947
chr16	3242027	3256633	14607	-	MEFV	protein_coding	ENSG00000103313	ENSG00000103313.13	25.8401	2.0476	4.67829	-1.50543	0.0043729	1.23912e-07	0.00604119	TRUE	TRUE	TRUE	up.early	0	1	4	90	44	66	18	19	3	-0.973282	1.1449	-0.171619	6.45269	7.51274	6.85389
chr16	22206278	22288738	82461	+	EEF2K	protein_coding	ENSG00000103319	ENSG00000103319.12	2581.47	-0.489407	0.0750126	-0.561567	0.000802117	0.692861	7.644e-05	TRUE	FALSE	TRUE	down.late	1945	3177	3079	3034	3577	2734	1577	2194	2168	0.460638	0.759471	-1.22011	11.5301	11.6201	11.0235
chr16	88715338	88785220	69883	-	PIEZO1	protein_coding	ENSG00000103335	ENSG00000103335.22	17003	-1.2335	-0.689435	-0.441984	1.57778e-13	3.44306e-05	0.00736325	TRUE	TRUE	TRUE	down.early	19299	28411	28693	15181	18203	13829	8469	11415	10524	1.17728	-0.161186	-1.01609	14.6443	13.8689	13.3736
chr16	11868128	11916082	47955	-	GSPT1	protein_coding	ENSG00000103342	ENSG00000103342.13	10058.2	-0.32862	-0.389288	0.067747	0.01832	0.00353381	0.713706	FALSE	TRUE	FALSE	down.early	10522	12252	12960	7595	11386	8778	8333	9859	9119	1.15714	-0.769093	-0.388049	13.5641	13.128	13.2142
chr16	3401215	3409364	8150	+	ZNF174	protein_coding	ENSG00000103343	ENSG00000103343.13	405.286	-0.305572	0.177388	-0.499056	0.107207	0.353423	0.00446627	FALSE	FALSE	TRUE	down.late	344	454	435	565	461	444	306	342	302	0.137288	0.904352	-1.04164	9.11773	9.28892	8.85462
chr16	3500976	3539048	38073	+	CLUAP1	protein_coding	ENSG00000103351	ENSG00000103351.13	450.714	-0.536065	-0.0464141	-0.440563	0.00545667	0.851113	0.0178985	TRUE	FALSE	FALSE	down.late	433	517	602	450	625	511	280	354	321	0.652657	0.454584	-1.10724	9.3684	9.31691	8.91093
chr16	23520754	23557731	36978	-	EARS2	protein_coding	ENSG00000103356	ENSG00000103356.18	2531.92	-0.454579	-0.40979	-0.0134075	0.00956217	0.0154789	0.963949	TRUE	FALSE	FALSE	down.early	2461	3453	3289	2306	2858	1981	1823	2236	2389	1.09453	-0.53435	-0.560183	11.6796	11.2105	11.2031
chr16	23463542	23521995	58454	-	GGA2	protein_coding	ENSG00000103365	ENSG00000103365.15	1930.23	0.201502	-0.283104	0.5057	0.23945	0.0705757	0.000888284	FALSE	FALSE	TRUE	up.late	1770	2226	2146	1521	2021	1578	1699	2184	2091	0.127903	-1.07176	0.943854	11.0375	10.7152	11.2567
chr16	12659799	12803887	144089	-	CPPED1	protein_coding	ENSG00000103381	ENSG00000103381.12	886.174	-0.655511	0.0543685	-0.711246	0.00253046	0.8372	0.000888546	TRUE	FALSE	TRUE	down.late	975	953	1086	869	1402	1131	486	560	585	0.454583	0.652462	-1.10705	10.1506	10.2304	9.52096
chr16	4474690	4510347	35658	+	HMOX2	protein_coding	ENSG00000103415	ENSG00000103415.12	2924.22	0.0495488	-0.337228	0.393858	0.792386	0.0151363	0.00441897	FALSE	FALSE	TRUE	up.late	2592	3646	3146	2580	2703	2052	3101	3337	3194	0.456778	-1.1726	0.715825	11.6761	11.3066	11.7348
chr16	4425805	4456775	30971	+	DNAJA3	protein_coding	ENSG00000103423	ENSG00000103423.14	3595.56	-0.509223	-0.377486	-0.0941983	0.000294596	0.00673973	0.599122	TRUE	TRUE	FALSE	down.early	3807	4794	4828	2858	3948	2825	2782	3339	3317	1.19148	-0.402616	-0.788866	12.1664	11.7439	11.6415
chr16	53433977	53491648	57672	+	RBL2	protein_coding	ENSG00000103479	ENSG00000103479.16	3083.46	-0.535626	-0.69995	0.140393	0.00110385	1.58544e-05	0.457878	TRUE	TRUE	FALSE	down.early	3089	4035	4828	1977	2898	2598	2667	3477	2272	1.18919	-0.800264	-0.38893	12.0562	11.324	11.4754
chr16	31201486	31203450	1965	-	PYCARD	protein_coding	ENSG00000103490	ENSG00000103490.14	170.863	-9.05309	-1.91983	-7.10982	1.12941e-15	1.59586e-13	3.19841e-10	TRUE	TRUE	TRUE	down.early	315	543	416	132	104	85	0	1	0	1.11005	0.0721966	-1.18225	9.10702	7.85456	6.34073
chr16	53598153	53703938	105786	-	RPGRIP1L	protein_coding	ENSG00000103494	ENSG00000103494.15	581.474	-0.846578	-0.0438484	-0.772848	5.28103e-06	0.857236	3.14469e-05	TRUE	FALSE	TRUE	down.late	584	655	936	542	843	795	343	271	412	0.68003	0.555987	-1.23602	9.72798	9.68031	8.99168
chr16	31032889	31042975	10087	+	STX4	protein_coding	ENSG00000103496	ENSG00000103496.15	749.808	-0.473756	-0.37981	-0.0559645	0.00362803	0.0164574	0.803966	TRUE	FALSE	FALSE	down.early	783	1039	1051	703	758	678	577	710	507	1.16228	-0.453771	-0.708511	10.0691	9.68673	9.62645
chr16	29858357	29863414	5058	-	CDIPT	protein_coding	ENSG00000103502	ENSG00000103502.14	2400.27	-0.646141	-0.386653	-0.211456	6.74895e-07	0.00304171	0.13899	TRUE	TRUE	FALSE	down.early	2235	3656	3362	2358	2485	2013	1823	2066	1789	1.18954	-0.208815	-0.980729	11.6408	11.2297	11.0028
chr16	31114489	31131393	16905	+	KAT8	protein_coding	ENSG00000103510	ENSG00000103510.20	905.71	-0.560886	-0.26688	-0.250768	5.79819e-06	0.0358262	0.0570213	TRUE	FALSE	FALSE	down.early	849	1160	1227	878	1055	847	640	801	739	1.14044	-0.0313021	-1.10914	10.2866	10.0211	9.77679
chr16	14833721	14896157	62437	+	NOMO1	protein_coding	ENSG00000103512	ENSG00000103512.15	8491.49	-0.681058	-0.613936	-0.0520993	3.06099e-09	9.59328e-08	0.760497	TRUE	TRUE	FALSE	down.early	8621	11877	13622	6662	8347	7118	6048	7791	6917	1.29818	-0.56155	-0.73663	13.484	12.8483	12.7884
chr16	19410496	19499113	88618	+	TMC5	protein_coding	ENSG00000103534	ENSG00000103534.17	105.441	-7.03721	-1.40546	-5.51904	2.83111e-16	1.53288e-06	2.21293e-10	TRUE	TRUE	TRUE	down.early	266	261	315	67	145	70	1	0	2	1.06892	0.133969	-1.20289	8.54257	7.6816	6.45054
chr16	19523811	19553408	29598	+	CCP110	protein_coding	ENSG00000103540	ENSG00000103540.16	1156.56	-0.52579	-0.668083	0.11629	0.0225326	0.00314012	0.651605	FALSE	TRUE	FALSE	down.early	1216	1546	1822	560	1296	902	864	898	1365	1.0457	-0.720715	-0.324987	10.7483	9.98658	10.1572
chr16	19555240	19706793	151554	+	VPS35L	protein_coding	ENSG00000103544	ENSG00000103544.15	2423.52	-1.11043	-0.841317	-0.234187	1.92806e-21	7.81046e-13	0.0688553	TRUE	TRUE	FALSE	down.early	3058	3725	4104	1781	2269	1991	1493	1899	1569	1.28887	-0.395544	-0.893325	11.8862	11.0599	10.8158
chr16	30761745	30776307	14563	+	RNF40	protein_coding	ENSG00000103549	ENSG00000103549.22	4507.27	-0.839767	-0.413798	-0.364615	2.51164e-10	0.00199362	0.00743159	TRUE	TRUE	TRUE	down.early	4704	6630	6606	4543	5176	4009	2676	3287	3328	1.13533	-0.0491752	-1.08615	12.5756	12.1229	11.7265
chr16	19701937	19718235	16299	-	KNOP1	protein_coding	ENSG00000103550	ENSG00000103550.14	1641.87	-0.424513	-0.559922	0.125092	0.00803066	0.000298939	0.505156	TRUE	TRUE	FALSE	down.early	1825	2192	2097	1497	1911	1217	1096	1404	1585	1.15583	-0.83378	-0.32205	11.1154	10.5424	10.6898
chr15	67200667	67255195	54529	-	AAGAB	protein_coding	ENSG00000103591	ENSG00000103591.13	2056.72	-0.430213	-0.300163	-0.101125	0.000417423	0.0142609	0.509793	TRUE	FALSE	FALSE	down.early	2116	2547	2588	1920	2257	1741	1605	1845	1926	1.22013	-0.342841	-0.877286	11.3447	11.027	10.9184
chr15	68578993	68727806	148814	+	CORO2B	protein_coding	ENSG00000103647	ENSG00000103647.13	180.226	4.674	3.48552	0.964701	5.91598e-34	3.44143e-19	0.0010409	TRUE	TRUE	TRUE	up.early	18	10	10	152	220	137	315	411	360	-1.22204	0.196666	1.02538	6.89162	8.21032	8.98062
chr15	74782057	74803198	21142	+	CSK	protein_coding	ENSG00000103653	ENSG00000103653.16	3501	0.844411	0.355384	0.442833	4.58894e-14	0.00203159	9.58459e-05	TRUE	TRUE	TRUE	up.early	2112	2860	2733	3230	4165	2815	4214	4937	4572	-1.09179	-0.0864168	1.1782	11.3925	11.7621	12.2271
chr15	64387748	64455303	67556	+	TRIP4	protein_coding	ENSG00000103671	ENSG00000103671.10	498.007	-0.42729	-0.293775	-0.0943234	0.00488096	0.050635	0.620684	TRUE	FALSE	FALSE	down.early	533	593	593	439	521	464	410	500	416	1.18415	-0.340402	-0.843749	9.53695	9.25905	9.1673
chr15	82659281	82709946	50666	-	AP3B2	protein_coding	ENSG00000103723	ENSG00000103723.16	144.656	2.69485	0.195393	2.38745	6.87369e-33	0.398727	4.99167e-27	TRUE	FALSE	TRUE	up.late	51	52	53	52	77	53	250	330	349	-0.742933	-0.581705	1.32464	7.39951	7.51389	8.86637
chr15	65726054	65891989	165936	+	RAB11A	protein_coding	ENSG00000103769	ENSG00000103769.10	5333.4	-0.248325	-0.494137	0.230663	0.0917507	0.000276247	0.116438	FALSE	TRUE	FALSE	down.early	5657	6727	8073	3536	5351	4407	4712	5687	4459	1.05397	-1.03095	-0.0230205	12.6712	12.139	12.3963
chr15	78921058	78949574	28517	-	CTSH	protein_coding	ENSG00000103811	ENSG00000103811.18	1947.71	1.02076	-1.69595	2.77945	7.52492e-11	1.64265e-25	3.82125e-67	TRUE	TRUE	TRUE	up.late	1367	1740	2134	443	626	498	3707	4108	2975	0.146919	-1.21204	1.06513	10.8625	9.37651	11.8665
chr15	73683966	73714514	30549	+	CD276	protein_coding	ENSG00000103855	ENSG00000103855.18	5411.16	0.341371	0.511681	-0.156692	0.0671638	0.00366957	0.435516	FALSE	TRUE	FALSE	up.early	3264	4658	4563	6316	7166	5901	5236	6390	5233	-1.0204	0.811466	0.208938	12.0884	12.6685	12.4777
chr15	80152490	80186946	34457	+	FAH	protein_coding	ENSG00000103876	ENSG00000103876.13	1133.95	0.587394	0.539804	0.0286413	1.15419e-05	4.87899e-05	0.891167	TRUE	TRUE	FALSE	up.early	693	900	984	1177	1510	1173	1132	1478	1206	-1.27673	0.585886	0.690844	9.9511	10.467	10.496
chr15	80779343	80951776	172434	+	CEMIP	protein_coding	ENSG00000103888	ENSG00000103888.17	629.509	4.9608	2.35268	2.46748	1.64474e-52	1.31587e-12	5.5097e-15	TRUE	TRUE	TRUE	up.late	68	73	66	173	279	178	1499	2002	753	-1.02816	-0.162796	1.19096	7.39828	8.66596	10.6491
chr15	82836946	82986153	149208	-	HOMER2	protein_coding	ENSG00000103942	ENSG00000103942.13	839.62	-0.2859	-0.861541	0.488961	0.174998	2.05737e-05	0.0119908	FALSE	TRUE	FALSE	down.early	1027	1371	1441	446	661	426	788	857	789	0.931557	-1.10468	0.173119	10.2791	9.45339	9.97155
chr15	41895933	41972557	76625	-	EHD4	protein_coding	ENSG00000103966	ENSG00000103966.11	4221.47	0.467986	0.1419	0.282715	0.0013737	0.394563	0.0587586	TRUE	FALSE	FALSE	up.late	3231	3810	3500	3919	5008	3563	4974	5872	4262	-0.892099	-0.201176	1.09327	11.8564	12.0268	12.3461
chr15	43232590	43266928	34339	-	TGM5	protein_coding	ENSG00000104055	ENSG00000104055.16	105.355	4.47882	0.520046	3.51261	1.10866e-25	0.0987425	1.07621e-18	TRUE	FALSE	TRUE	up.late	7	17	13	17	29	16	291	366	227	-0.769067	-0.53122	1.30029	6.83651	7.05121	8.7045
chr15	29699367	29968915	269549	-	TJP1	protein_coding	ENSG00000104067	ENSG00000104067.17	6566.34	-0.803708	-0.265294	-0.452161	1.0853e-06	0.115011	0.00567427	TRUE	FALSE	TRUE	down.early	7609	7612	9303	4684	9166	7567	3780	4983	4998	0.974441	0.142989	-1.11743	13.0581	12.7232	12.2156
chr15	40087890	40108892	21003	-	BMF	protein_coding	ENSG00000104081	ENSG00000104081.14	235.066	-2.87222	-1.95295	-0.442457	1.00727e-10	5.85589e-06	0.147052	TRUE	TRUE	FALSE	down.early	265	607	577	121	94	131	68	88	35	1.21584	-0.379596	-0.836246	9.35248	7.92569	7.51732
chr15	40872214	40874234	2021	-	RHOV	protein_coding	ENSG00000104140	ENSG00000104140.7	367.399	2.13248	-1.06308	3.41182	6.34949e-13	0.00028966	7.06079e-29	TRUE	TRUE	TRUE	up.late	98	250	214	92	87	56	931	1051	537	-0.313269	-0.926959	1.24023	8.2951	7.65431	9.9172
chr15	40894450	40903975	9526	+	VPS18	protein_coding	ENSG00000104142	ENSG00000104142.11	1472.71	0.243051	0.470041	-0.212936	0.143489	0.00192367	0.196398	FALSE	TRUE	FALSE	up.early	949	1353	1340	2002	1688	1600	1333	1516	1511	-1.01024	0.977058	0.0331835	10.4063	10.8812	10.6556
chr15	48134632	48178353	43722	-	MYEF2	protein_coding	ENSG00000104177	ENSG00000104177.18	326.826	0.304494	-6.15518	6.77969	0.410402	4.6417e-18	9.23637e-22	FALSE	TRUE	TRUE	up.late	381	441	507	4	4	2	585	614	672	0.467337	-1.30975	0.842418	9.03265	6.65855	9.53374
chr8	66712734	66862022	149289	+	SGK3	protein_coding	ENSG00000104205	ENSG00000104205.16	267.75	-0.877553	-0.575877	-0.162473	0.000772593	0.0191783	0.535868	TRUE	FALSE	FALSE	down.early	381	474	476	169	310	208	133	148	201	1.09359	-0.289652	-0.80394	9.05251	8.51349	8.31309
chr8	17576433	17644071	67639	+	PDGFRL	protein_coding	ENSG00000104213	ENSG00000104213.13	28.5013	5.2568	5.43275	-0.125306	1.23188e-06	3.8147e-07	0.701749	TRUE	TRUE	FALSE	up.early	1	1	0	41	66	30	26	39	54	-1.27637	0.740979	0.535391	6.39567	7.36162	7.26318
chr8	67062417	67196778	134362	+	CSPP1	protein_coding	ENSG00000104218	ENSG00000104218.16	862.618	-0.693315	-0.274165	-0.306905	0.000743759	0.173123	0.130255	TRUE	FALSE	FALSE	down.early	1023	1143	1315	708	990	857	436	593	797	0.947394	0.0487336	-0.996127	10.2852	9.96274	9.58783
chr8	17156482	17224799	68318	+	ZDHHC2	protein_coding	ENSG00000104219	ENSG00000104219.13	1140.6	-1.81572	-1.15468	-0.408665	1.14294e-10	2.49913e-05	0.0892673	TRUE	TRUE	FALSE	down.early	1782	2060	2379	473	1042	918	462	570	592	1.18633	-0.332683	-0.853649	11.0872	9.85906	9.43784
chr8	81701334	81732903	31570	-	ZFAND1	protein_coding	ENSG00000104231	ENSG00000104231.11	1183.46	-0.17771	-0.546815	0.335949	0.413317	0.00385582	0.078083	FALSE	TRUE	FALSE	down.early	1150	1417	1639	703	1125	1039	1186	1277	1076	0.819903	-1.02677	0.206867	10.6173	10.0201	10.4191
chr8	54509422	54871720	362299	+	RP1	protein_coding	ENSG00000104237	ENSG00000104237.11	206.349	-0.213119	-2.5809	2.31889	0.280727	1.06289e-33	8.30895e-27	FALSE	TRUE	TRUE	up.late	272	454	495	40	58	41	244	261	174	0.790854	-1.31788	0.527031	8.81739	7.41352	8.64175
chr8	85463968	85481493	17526	+	CA2	protein_coding	ENSG00000104267	ENSG00000104267.10	3817.35	-2.95629	-4.6758	1.68732	2.20039e-76	2.48726e-180	4.60897e-24	TRUE	TRUE	TRUE	down.early	8615	11345	9240	359	490	327	1089	1205	1430	1.25639	-1.00524	-0.251147	13.2761	9.03201	10.4471
chr8	28494205	28574267	80063	+	FZD3	protein_coding	ENSG00000104290	ENSG00000104290.11	1387.61	-0.0162777	-0.751951	0.726441	0.940189	5.92774e-07	1.18333e-06	FALSE	TRUE	TRUE	up.late	1177	1673	2118	792	1213	1122	1171	1350	1952	0.658323	-1.27024	0.611912	10.7964	10.0665	10.7788
chr8	28767661	28890242	122582	-	INTS9	protein_coding	ENSG00000104299	ENSG00000104299.15	945.859	-0.996835	-0.616597	-0.323291	1.13433e-13	4.08092e-06	0.0213401	TRUE	TRUE	FALSE	down.early	1161	1504	1470	789	1104	869	477	622	690	1.22982	-0.227038	-1.00278	10.5409	9.95589	9.64439
chr8	89757806	89791064	33259	+	RIPK2	protein_coding	ENSG00000104312	ENSG00000104312.8	1796.82	-0.259088	-1.1107	0.800365	0.115932	6.13675e-13	1.80004e-07	FALSE	TRUE	TRUE	down.early	2183	2351	2575	954	1362	1024	1960	2096	1609	0.909259	-1.24403	0.334772	11.3033	10.2509	11.0225
chr8	71197433	71592025	394593	-	EYA1	protein_coding	ENSG00000104313	ENSG00000104313.20	6.96623	0.0119434	2.42904	-2.03549	0.982411	0.0030243	0.0101379	FALSE	TRUE	FALSE	down.late	1	1	4	18	20	23	2	1	0	-0.593412	1.19787	-0.604458	6.47546	6.94775	6.47255
chr8	89933331	90003228	69898	-	NBN	protein_coding	ENSG00000104320	ENSG00000104320.14	3030.57	-0.988415	-0.907122	-0.0707125	2.31066e-19	2.15382e-16	0.650065	TRUE	TRUE	FALSE	down.early	3881	4415	5102	1656	3108	2700	2059	2225	2368	1.31972	-0.578187	-0.741528	12.1849	11.2935	11.2168
chr8	96645242	97149654	504413	+	CPQ	protein_coding	ENSG00000104324	ENSG00000104324.16	36.3394	3.1245	3.84418	-0.298203	4.36573e-07	5.97466e-10	0.333417	TRUE	TRUE	FALSE	up.early	8	4	2	49	58	56	35	37	31	-1.19221	0.873393	0.318817	6.59376	7.53689	7.28368
chr8	90001405	90053633	52229	+	DECR1	protein_coding	ENSG00000104325	ENSG00000104325.7	1972.65	-0.927302	-0.733412	-0.15882	4.63208e-12	5.38985e-08	0.31156	TRUE	TRUE	FALSE	down.early	2302	3005	3159	1692	1748	1624	1384	1660	1236	1.27771	-0.434321	-0.843385	11.5403	10.8106	10.6363
chr8	90058608	90095475	36868	-	CALB1	protein_coding	ENSG00000104327	ENSG00000104327.7	12.9977	4.77274	0.000526499	4.45674	7.05707e-07	1	5.04682e-05	TRUE	FALSE	TRUE	up.late	1	2	1	0	2	0	41	55	23	-0.593738	-0.674284	1.26802	6.44643	6.41206	7.24071
chr8	41261962	41309473	47512	-	SFRP1	protein_coding	ENSG00000104332	ENSG00000104332.12	4155.48	-0.0910224	0.522551	-0.622853	0.570227	3.51122e-05	6.50071e-07	FALSE	TRUE	TRUE	down.late	2734	3905	4392	4824	6931	4950	3055	3829	3295	-0.480507	1.26629	-0.785783	11.8911	12.4391	11.7953
chr8	97775057	97853013	77957	+	LAPTM4B	protein_coding	ENSG00000104341	ENSG00000104341.17	7775.26	-0.448071	-0.442317	0.00370763	4.85778e-06	5.12454e-06	0.987472	TRUE	TRUE	FALSE	down.early	7603	10143	10865	6368	8277	6545	6482	7390	6713	1.31753	-0.668659	-0.648873	13.2418	12.7809	12.7854
chr8	73780097	73878910	98814	-	UBE2W	protein_coding	ENSG00000104343	ENSG00000104343.21	1105.64	-0.087331	-0.480822	0.377002	0.702931	0.00759787	0.037546	FALSE	TRUE	FALSE	down.early	1089	1269	1532	603	1048	971	1056	1259	1167	0.694774	-1.07662	0.381844	10.4748	9.95358	10.3827
chr8	98117293	98159835	42543	+	POP1	protein_coding	ENSG00000104356	ENSG00000104356.11	2494.81	-0.515263	0.0272711	-0.516654	0.0134985	0.921052	0.00963895	FALSE	FALSE	TRUE	down.late	2481	2946	3071	2527	3629	2544	1339	1824	2177	0.491477	0.574904	-1.06638	11.5166	11.5485	10.9222
chr8	98189826	98294393	104568	-	NIPAL2	protein_coding	ENSG00000104361	ENSG00000104361.10	939.028	-1.95048	-1.46315	-0.298954	1.0853e-12	7.19268e-08	0.209711	TRUE	TRUE	FALSE	down.early	1330	1589	2111	487	886	791	335	470	338	1.23017	-0.370955	-0.859215	10.9111	9.54549	9.12906
chr8	42174718	42207709	32992	-	PLAT	protein_coding	ENSG00000104368	ENSG00000104368.19	13553.6	9.06086	4.225	4.80972	1.54987e-159	5.30226e-35	4.77628e-49	TRUE	TRUE	TRUE	up.late	74	72	76	1078	1519	1259	43647	54816	16697	-1.05308	-0.160976	1.21406	7.59895	10.5459	15.0882
chr8	74234700	74321540	86841	-	JPH1	protein_coding	ENSG00000104369	ENSG00000104369.5	673.752	0.135562	-1.06032	1.29319	0.637012	5.81331e-05	2.17197e-06	FALSE	TRUE	TRUE	up.late	701	819	774	253	536	283	732	884	991	0.446739	-1.17917	0.732431	9.847	8.88436	10.0161
chr8	98371228	98942827	571600	-	STK3	protein_coding	ENSG00000104375	ENSG00000104375.17	956.083	-1.69808	-1.90501	0.141882	6.16178e-16	2.08155e-19	0.534937	TRUE	TRUE	FALSE	down.early	1490	1674	1973	362	569	520	566	598	564	1.29049	-0.754189	-0.536304	10.9516	9.26056	9.44077
chr8	74320613	74518007	197395	+	GDAP1	protein_coding	ENSG00000104381	ENSG00000104381.14	266.645	-0.377366	-0.913125	0.350431	0.218076	0.00456144	0.201413	FALSE	TRUE	FALSE	down.early	364	309	414	122	245	176	161	168	384	0.89337	-0.799561	-0.0938084	9.02153	8.21346	8.55033
chr8	60516936	60623644	106709	+	RAB2A	protein_coding	ENSG00000104388	ENSG00000104388.15	3249.43	-0.85364	-0.636335	-0.153198	2.0047e-06	0.000369147	0.449889	TRUE	TRUE	FALSE	down.early	4122	4702	5303	2245	3307	2908	2097	2522	2242	1.19054	-0.400562	-0.789979	12.2007	11.4916	11.318
chr8	108162787	108443496	280710	-	EIF3E	protein_coding	ENSG00000104408	ENSG00000104408.11	13262.5	-0.509191	-0.377428	-0.0934102	0.000369408	0.00762753	0.607567	TRUE	TRUE	FALSE	down.early	13475	17013	18503	9823	14094	12930	11145	11653	11046	1.1782	-0.400374	-0.777831	14.0153	13.5767	13.4718
chr8	94641074	94707466	66393	+	ESRP1	protein_coding	ENSG00000104413	ENSG00000104413.18	7336.87	-0.256811	-1.81545	1.51316	0.167604	5.46824e-25	1.04156e-17	FALSE	TRUE	TRUE	down.early	8851	10599	12137	2224	4093	2766	8246	10203	7119	0.820804	-1.28893	0.468122	13.3823	11.5701	13.0794
chr8	133237175	133302022	64848	-	NDRG1	protein_coding	ENSG00000104419	ENSG00000104419.17	4873.34	-0.510847	0.121324	-0.664655	0.052175	0.655947	0.00955524	FALSE	FALSE	TRUE	down.late	2899	6904	6756	5805	6942	6232	3303	4217	1827	0.253078	0.684878	-0.937957	12.3543	12.602	11.6709
chr8	78666089	78719765	53677	+	ZC2HC1A	protein_coding	ENSG00000104427	ENSG00000104427.12	323.872	-2.13883	-0.937306	-0.8628	1.24636e-11	0.001152	0.00286772	TRUE	TRUE	TRUE	down.early	428	472	626	139	324	317	138	149	139	1.13127	-0.140186	-0.991087	9.50671	8.60354	7.99911
chr8	78675743	78805523	129781	-	IL7	protein_coding	ENSG00000104432	ENSG00000104432.14	22.0974	0.85835	2.18528	-0.661497	0.0285018	1.18835e-05	0.0488893	FALSE	TRUE	FALSE	up.early	8	7	9	25	37	42	16	21	25	-1.0825	1.16438	-0.0818867	6.73417	7.29216	6.98266
chr8	65602458	65634217	31760	-	ARMC1	protein_coding	ENSG00000104442	ENSG00000104442.10	2106.34	-0.206528	-0.376649	0.166607	0.187451	0.00782937	0.301081	FALSE	TRUE	FALSE	down.early	2207	2389	2680	1374	2306	1936	1842	2174	2140	1.00605	-0.965759	-0.0402903	11.3378	10.9279	11.1203
chr8	115408496	115809673	401178	-	TRPS1	protein_coding	ENSG00000104447	ENSG00000104447.13	3548.7	-1.77367	-1.32267	-0.320732	1.23889e-16	6.28479e-10	0.114271	TRUE	TRUE	FALSE	down.early	5482	6346	7804	1749	3007	2895	1315	1725	2121	1.24881	-0.387815	-0.86099	12.6736	11.3119	10.9182
chr8	140511311	140517154	5844	+	CHRAC1	protein_coding	ENSG00000104472	ENSG00000104472.10	799.558	-0.520772	-0.306523	-0.148269	0.0039763	0.0832758	0.465832	TRUE	FALSE	FALSE	down.early	957	1086	1222	498	981	686	511	696	729	1.04926	-0.233819	-0.815444	10.1465	9.80583	9.65141
chr8	81799581	81842866	43286	-	SNX16	protein_coding	ENSG00000104497	ENSG00000104497.14	437.099	-0.659671	-1.08374	0.343594	6.1824e-05	1.01837e-10	0.0422377	TRUE	TRUE	FALSE	down.early	498	695	809	182	408	293	375	406	372	1.20931	-1.00031	-0.208996	9.61223	8.74158	9.05338
chr8	102252273	102412759	160487	-	UBR5	protein_coding	ENSG00000104517	ENSG00000104517.13	7525.82	-0.608562	-0.590156	-0.00602819	5.05377e-06	8.55851e-06	0.984008	TRUE	TRUE	FALSE	down.early	7412	10394	11626	5627	7926	6633	5177	6941	6474	1.26491	-0.621305	-0.643609	13.2927	12.6652	12.6578
chr8	143553207	143563062	9856	+	GSDMD	protein_coding	ENSG00000104518	ENSG00000104518.11	1010.02	0.232374	-1.94257	2.25772	0.365504	1.20707e-13	4.78687e-18	FALSE	TRUE	TRUE	up.late	1017	1536	1280	370	288	221	1582	1649	1139	0.497558	-1.26625	0.768687	10.411	8.77248	10.6629
chr8	143612618	143618048	5431	-	GFUS	protein_coding	ENSG00000104522	ENSG00000104522.16	3853.19	-0.652798	-0.170799	-0.40532	0.000224907	0.370956	0.019963	TRUE	FALSE	FALSE	down.early	4006	4987	4835	3901	4696	3775	3003	2990	2416	0.867266	0.227263	-1.09453	12.2417	12.0122	11.5381
chr8	124998497	125022283	23787	+	SQLE	protein_coding	ENSG00000104549	ENSG00000104549.12	6635.41	-0.797056	-0.267735	-0.482316	9.50602e-12	0.0294062	4.4225e-05	TRUE	FALSE	TRUE	down.early	7179	8797	9047	6303	7983	6586	4073	4882	5122	1.01609	0.198624	-1.21472	13.059	12.7621	12.2488
chr8	19313693	19396218	82526	+	SH2D4A	protein_coding	ENSG00000104611	ENSG00000104611.12	1329.73	-0.355349	-0.604713	0.219193	0.0418559	0.000292914	0.221869	FALSE	TRUE	FALSE	down.early	1608	1696	1614	916	1379	965	1006	1266	1523	1.07872	-0.933711	-0.145005	10.8307	10.2207	10.4598
chr8	19817391	19852083	34693	+	INTS10	protein_coding	ENSG00000104613	ENSG00000104613.12	2690.47	-0.358074	-0.312191	-0.0303435	0.000883004	0.00352636	0.857828	TRUE	TRUE	FALSE	down.early	2692	3378	3422	2384	2876	2226	2342	2627	2362	1.29258	-0.55368	-0.738902	11.6918	11.3664	11.3338
chr8	9002147	9116746	114600	+	ERI1	protein_coding	ENSG00000104626	ENSG00000104626.15	1371.12	-0.766865	-0.667855	-0.0727609	2.15371e-07	6.45227e-06	0.71855	TRUE	TRUE	FALSE	down.early	1664	2014	2052	914	1460	1131	977	1051	1153	1.26345	-0.519748	-0.743701	10.9945	10.3374	10.2549
chr8	23270120	23296279	26160	+	R3HCC1	protein_coding	ENSG00000104679	ENSG00000104679.12	1283.99	-0.609843	-0.0636933	-0.505179	0.000138426	0.763384	0.00130941	TRUE	FALSE	TRUE	down.late	1224	1714	1512	1636	1504	1202	913	912	976	0.737292	0.461601	-1.19889	10.6838	10.5999	10.0942
chr8	23190452	23225102	34651	-	TNFRSF10A	protein_coding	ENSG00000104689	ENSG00000104689.10	1758.56	0.163531	-0.56517	0.762898	0.391373	0.000621353	4.03916e-06	FALSE	TRUE	TRUE	up.late	1586	1914	2105	1207	1512	983	1880	2382	2292	0.366032	-1.20125	0.835217	10.9988	10.3974	11.1788
chr8	30729131	30767006	37876	+	UBXN8	protein_coding	ENSG00000104691	ENSG00000104691.16	347.37	-1.09588	-0.111604	-0.940346	6.08543e-09	0.602916	8.32907e-07	TRUE	FALSE	TRUE	down.late	376	452	502	332	478	393	180	181	237	0.780444	0.489502	-1.26995	9.20335	9.08668	8.38114
chr8	30774457	30814314	39858	-	PPP2CB	protein_coding	ENSG00000104695	ENSG00000104695.13	3550.49	-0.796501	-0.601677	-0.167039	5.21443e-13	6.17598e-08	0.193944	TRUE	TRUE	FALSE	down.early	3975	4974	5720	2689	3622	2891	2537	3120	2673	1.28349	-0.394115	-0.889379	12.2788	11.6699	11.4901
chr8	614746	738106	123361	-	ERICH1	protein_coding	ENSG00000104714	ENSG00000104714.14	556.46	-0.426354	-0.632402	0.176722	0.0187751	0.000318985	0.366919	FALSE	TRUE	FALSE	down.early	570	824	826	442	549	446	349	496	549	1.12839	-0.868636	-0.259754	9.754	9.18494	9.35845
chr8	15417215	15766649	349435	+	TUSC3	protein_coding	ENSG00000104723	ENSG00000104723.21	3295.35	-0.94814	-1.22936	0.227615	1.22513e-11	3.05861e-18	0.136462	TRUE	TRUE	FALSE	down.early	4308	5321	5842	1905	2813	2213	2332	2622	2351	1.27802	-0.871005	-0.407012	12.369	11.1601	11.4211
chr8	1823926	1958641	134716	+	ARHGEF10	protein_coding	ENSG00000104728	ENSG00000104728.16	2121.05	-0.992726	-0.301047	-0.600067	1.18212e-09	0.0667408	0.000206596	TRUE	FALSE	TRUE	down.early	2354	2981	2862	1974	2971	2132	1049	1407	1509	0.974199	0.208381	-1.18258	11.5357	11.1855	10.5495
chr16	87696485	87765992	69508	-	KLHDC4	protein_coding	ENSG00000104731	ENSG00000104731.14	2267.76	-1.12091	-0.890486	-0.153803	9.719e-08	2.24726e-05	0.498448	TRUE	TRUE	FALSE	down.early	2545	4572	3752	2145	1815	1405	1313	1506	1582	1.21185	-0.462524	-0.749325	11.8309	10.8698	10.7051
chr8	25427847	25458476	30630	-	KCTD9	protein_coding	ENSG00000104756	ENSG00000104756.16	2340.81	-0.714053	-0.797383	0.073452	1.5991e-09	1.74582e-11	0.656748	TRUE	TRUE	FALSE	down.early	2739	3505	3882	1401	2193	1820	1818	2175	1849	1.30543	-0.757838	-0.54759	11.7335	10.9505	11.0303
chr8	18055992	18084998	29007	-	ASAH1	protein_coding	ENSG00000104763	ENSG00000104763.20	2931.06	-1.01364	-1.438	0.330118	1.01915e-09	1.62968e-17	0.0507462	TRUE	TRUE	FALSE	down.early	3987	4610	5876	1347	2154	1867	2188	2463	1998	1.24896	-0.915175	-0.333782	12.268	10.8621	11.2398
chr8	26383054	26505636	122583	+	BNIP3L	protein_coding	ENSG00000104765	ENSG00000104765.16	3432.5	-0.878535	-0.253725	-0.447054	0.00054137	0.284363	0.0571697	TRUE	FALSE	FALSE	down.early	3403	5453	5373	3311	3566	3519	2122	2498	1618	0.854733	0.104345	-0.959078	12.1881	11.7751	11.1899
chr19	48968130	48993310	25181	-	GYS1	protein_coding	ENSG00000104812	ENSG00000104812.15	5265.65	-0.56141	0.186627	-0.775645	5.12422e-05	0.216184	1.30919e-08	TRUE	FALSE	TRUE	down.late	4338	6263	6047	5918	7804	6162	3317	4307	3540	0.321337	0.90864	-1.22998	12.4838	12.7051	11.8993
chr19	38899700	38908893	9194	+	NFKBIB	protein_coding	ENSG00000104825	ENSG00000104825.17	1033.47	-0.492273	-0.302798	-0.135719	0.0027439	0.0620952	0.475059	TRUE	FALSE	FALSE	down.early	1004	1545	1309	1061	1168	800	728	853	922	1.09082	-0.260123	-0.830699	10.4595	10.1263	9.98554
chr19	44954585	44993341	38757	+	CLPTM1	protein_coding	ENSG00000104853	ENSG00000104853.16	5525.9	-0.215033	0.214097	-0.440624	0.109703	0.103185	0.000324529	FALSE	FALSE	TRUE	down.late	4637	5821	6076	5351	7473	6383	4005	5030	5162	-0.0126668	1.07641	-1.06374	12.4541	12.6958	12.2208
chr19	45001449	45038198	36750	+	RELB	protein_coding	ENSG00000104856	ENSG00000104856.14	687.423	2.09718	0.534731	1.42682	8.98318e-23	0.00836015	2.12857e-11	TRUE	TRUE	TRUE	up.late	287	310	257	542	465	442	1350	1455	1043	-0.932801	-0.315762	1.24856	8.76205	9.25149	10.4923
chr19	45091396	45148077	56682	+	PPP1R37	protein_coding	ENSG00000104866	ENSG00000104866.11	1948.04	-0.596413	-0.339746	-0.202857	2.57061e-05	0.0167649	0.191378	TRUE	FALSE	FALSE	down.early	1867	2833	2659	1994	2158	1520	1393	1729	1529	1.14951	-0.188695	-0.960814	11.3331	10.9598	10.7443
chr19	49506816	49526428	19613	+	FCGRT	protein_coding	ENSG00000104870	ENSG00000104870.13	8.5611	-1.11741	0.204376	-1.99095	0.0360377	0.541975	0.00456084	FALSE	FALSE	TRUE	down.late	6	14	9	12	12	13	4	3	0	0.263307	0.880655	-1.14396	6.77013	6.90248	6.46844
chr19	45349837	45370918	21082	-	ERCC2	protein_coding	ENSG00000104884	ENSG00000104884.16	1917.68	-0.397695	0.284515	-0.717503	0.00778953	0.053696	5.41877e-07	TRUE	FALSE	TRUE	down.late	1515	2158	2011	2706	2628	2096	1288	1521	1435	0.0940219	1.03504	-1.12906	11.0131	11.3203	10.6139
chr19	45333434	45351520	18087	+	KLC3	protein_coding	ENSG00000104892	ENSG00000104892.17	398.185	0.995357	-0.163602	1.2822	8.15182e-06	0.477641	4.11207e-08	TRUE	FALSE	TRUE	up.late	246	347	294	287	286	208	722	737	444	-0.428891	-0.781504	1.21039	8.78411	8.60822	9.60182
chr19	2236824	2248655	11832	+	SF3A2	protein_coding	ENSG00000104897	ENSG00000104897.10	2220.33	0.455922	0.144391	0.283587	4.93551e-05	0.265924	0.01427	TRUE	FALSE	FALSE	up.late	1581	2157	1927	1994	2608	1934	2478	2855	2558	-0.982542	-0.234421	1.21696	10.9996	11.1521	11.4479
chr19	2249309	2252073	2765	+	AMH	protein_coding	ENSG00000104899	ENSG00000104899.8	195.183	0.0680727	0.742343	-0.635355	0.815514	0.00124726	0.00464818	FALSE	TRUE	TRUE	down.late	129	186	164	307	299	210	113	151	198	-0.644845	1.15465	-0.509802	8.1495	8.69561	8.19048
chr19	45769709	45782552	12844	-	DMPK	protein_coding	ENSG00000104936	ENSG00000104936.19	1494.47	-1.57366	-1.17932	-0.301629	1.63833e-18	4.09988e-11	0.0934707	TRUE	TRUE	FALSE	down.early	2067	3004	2870	1251	1128	1116	676	980	636	1.2677	-0.394253	-0.873444	11.4052	10.2629	9.93353
chr19	49877425	49888750	11326	+	TBC1D17	protein_coding	ENSG00000104946	ENSG00000104946.13	966.74	-0.430869	0.140135	-0.585888	0.020346	0.487017	0.00097006	FALSE	FALSE	TRUE	down.late	754	1146	1171	1220	1133	1113	680	930	590	0.292335	0.813367	-1.1057	10.1875	10.3492	9.75365
chr19	2754715	2783362	28648	-	SGTA	protein_coding	ENSG00000104969	ENSG00000104969.11	3530.69	0.0767791	0.392842	-0.312267	0.616544	0.00086824	0.0100673	FALSE	TRUE	FALSE	down.late	2567	3449	3261	3872	5093	3900	2892	3404	3572	-0.809939	1.23006	-0.420124	11.6699	12.0843	11.7491
chr19	49818282	49840383	22102	+	MED25	protein_coding	ENSG00000104973	ENSG00000104973.19	2587.03	-0.505099	-0.112578	-0.354866	0.000221795	0.494212	0.00980601	TRUE	FALSE	TRUE	down.late	2277	3389	3532	2634	3241	2581	1852	2278	1796	0.84638	0.342591	-1.18897	11.6142	11.4876	11.1028
chr19	7920338	7923250	2913	+	SNAPC2	protein_coding	ENSG00000104976	ENSG00000104976.12	901.674	-0.904367	-0.223374	-0.586606	5.108e-07	0.227091	0.000928685	TRUE	FALSE	TRUE	down.late	898	1350	1184	1137	958	803	611	669	511	0.921075	0.246886	-1.16796	10.3586	10.0891	9.52343
chr19	14031762	14053218	21457	+	IL27RA	protein_coding	ENSG00000104998	ENSG00000104998.4	508.382	-0.349806	0.680217	-1.10076	0.0388526	1.77961e-05	1.19742e-11	FALSE	TRUE	TRUE	down.late	380	468	475	838	816	621	326	356	323	-0.245718	1.22285	-0.977128	9.2025	9.79461	8.9076
chr19	55132698	55149206	16509	-	TNNT1	protein_coding	ENSG00000105048	ENSG00000105048.17	740.087	-0.271438	-1.65465	1.27719	0.291456	6.28479e-10	1.82469e-06	FALSE	TRUE	TRUE	down.early	654	1440	1225	349	337	262	1041	983	514	0.842412	-1.17776	0.33535	10.2346	8.8511	9.88731
chr19	16496394	16521352	24959	+	C19orf44	protein_coding	ENSG00000105072	ENSG00000105072.9	180.087	0.00268273	0.890493	-0.884711	0.994718	3.25876e-05	4.49102e-05	FALSE	TRUE	TRUE	down.late	151	159	164	212	305	212	107	156	125	-0.633466	1.25421	-0.620743	8.06281	8.67652	8.06695
chr19	9853718	9936552	82835	-	OLFM2	protein_coding	ENSG00000105088	ENSG00000105088.8	3.75509	3.95512	0	3.77313	0.00208659	1	0.00245039	TRUE	FALSE	TRUE	up.late	0	0	0	0	0	0	18	8	8	-0.651814	-0.651814	1.30363	6.28361	6.28361	6.82045
chr19	15107401	15114985	7585	+	SYDE1	protein_coding	ENSG00000105137	ENSG00000105137.13	460.136	0.267186	3.98543	-3.61327	0.331513	3.57237e-46	1.74226e-39	FALSE	TRUE	TRUE	down.late	68	82	58	1331	1512	1058	65	80	144	-0.718616	1.31855	-0.599936	7.63449	10.3992	7.79555
chr19	15049480	15058293	8814	+	CASP14	protein_coding	ENSG00000105141	ENSG00000105141.6	843.908	-6.65979	-7.76596	0.454327	2.15054e-23	1.15071e-27	0.213416	TRUE	TRUE	FALSE	down.early	1015	3582	4273	7	8	4	26	32	14	1.30593	-0.709189	-0.59674	11.2339	6.76458	7.01398
chr19	39825350	39834201	8852	-	DYRK1B	protein_coding	ENSG00000105204	ENSG00000105204.14	319.915	-0.995629	-0.329825	-0.568814	2.07536e-09	0.0432086	0.000595721	TRUE	FALSE	TRUE	down.early	338	476	521	350	314	302	210	244	162	1.04277	0.14904	-1.19181	9.1641	8.86809	8.42399
chr19	40222208	40226697	4490	-	CCNP	protein_coding	ENSG00000105219	ENSG00000105219.10	41.6917	-1.74162	-0.282228	-0.957861	0.000136494	0.345716	0.0155368	TRUE	FALSE	FALSE	down.early	36	94	53	38	56	30	17	26	11	0.863676	0.197058	-1.06073	7.54129	7.32705	6.92282
chr19	40230317	40285536	55220	-	AKT2	protein_coding	ENSG00000105221	ENSG00000105221.18	7133.93	-0.296323	-0.0421399	-0.244564	0.00164816	0.759873	0.0110961	TRUE	FALSE	FALSE	down.late	5978	8280	8392	7091	8563	7003	5868	6873	6456	0.817087	0.496599	-1.31369	12.9417	12.8961	12.6384
chr19	4007736	4039386	31651	+	PIAS4	protein_coding	ENSG00000105229	ENSG00000105229.7	1130.88	0.502899	0.109886	0.343876	0.00189191	0.567763	0.0326593	TRUE	FALSE	FALSE	up.late	693	1216	978	1068	1191	860	1329	1581	1357	-0.818391	-0.306596	1.12499	10.0919	10.2243	10.5947
chr19	40665905	40690972	25068	-	NUMBL	protein_coding	ENSG00000105245	ENSG00000105245.9	1341.74	0.0669817	1.41905	-1.33169	0.832806	4.19629e-07	2.50048e-06	FALSE	TRUE	TRUE	down.late	667	935	865	2701	2091	2163	786	827	805	-0.641029	1.17829	-0.537266	9.90069	11.2011	9.97486
chr19	4247080	4269088	22009	+	YJU2	protein_coding	ENSG00000105248	ENSG00000105248.16	521.728	-0.121349	0.417811	-0.5589	0.540793	0.00993668	0.000542441	FALSE	TRUE	TRUE	down.late	395	549	464	750	678	599	408	438	428	-0.37483	1.18289	-0.808061	9.26949	9.66131	9.16052
chr19	36114289	36125947	11659	+	TBCB	protein_coding	ENSG00000105254	ENSG00000105254.12	2458.22	-0.342735	0.0299173	-0.361573	0.0140888	0.881326	0.00778708	FALSE	FALSE	TRUE	down.late	2122	3052	2723	2994	3053	2299	2043	2159	1829	0.515922	0.662825	-1.17875	11.4446	11.475	11.0935
chr19	4304598	4323843	19246	+	FSD1	protein_coding	ENSG00000105255	ENSG00000105255.11	17.6998	-2.02562	3.79604	-6.96865	0.0157671	5.9499e-07	6.23291e-09	FALSE	TRUE	TRUE	down.late	1	3	3	55	86	49	0	0	0	-0.361548	1.27526	-0.913714	6.5659	7.40268	6.28361
chr19	46774883	46788594	13712	-	SLC1A5	protein_coding	ENSG00000105281	ENSG00000105281.12	11961.9	0.209083	0.3258	-0.11821	0.113008	0.00753865	0.423926	FALSE	TRUE	FALSE	up.early	8020	11191	10888	12903	15009	12681	11666	14028	11999	-1.0937	0.931502	0.162199	13.3612	13.7202	13.5838
chr19	46674275	46717127	42853	-	PRKD2	protein_coding	ENSG00000105287	ENSG00000105287.13	2954.94	0.199897	-0.169543	0.377344	0.189134	0.268453	0.00630632	FALSE	FALSE	TRUE	up.late	2339	2961	3334	2233	2993	2310	3344	4331	3043	-0.0173154	-0.982507	0.999822	11.5857	11.3892	11.7927
chr19	3708362	3750813	42452	+	TJP3	protein_coding	ENSG00000105289	ENSG00000105289.15	663.477	-1.41049	-5.27535	3.71953	3.02971e-06	4.29387e-54	3.71625e-27	TRUE	TRUE	TRUE	down.early	1011	1650	1719	45	32	29	547	679	293	1.0565	-1.19757	0.141063	10.6465	7.24808	9.26628
chr19	41262496	41307787	45292	+	HNRNPUL1	protein_coding	ENSG00000105323	ENSG00000105323.17	17628.4	0.0105012	0.345419	-0.336585	0.957033	0.00654469	0.00886065	FALSE	TRUE	TRUE	down.late	12976	17105	17893	19193	25960	19889	13592	17083	16441	-0.625705	1.19247	-0.566767	13.9728	14.3543	13.9851
chr19	41301587	41353922	52336	-	TGFB1	protein_coding	ENSG00000105329	ENSG00000105329.11	2510.32	0.781434	1.10548	-0.253136	2.26976e-06	3.57307e-11	0.142211	TRUE	TRUE	FALSE	up.early	1140	1722	1700	2949	3982	3414	2704	3097	2074	-1.21912	0.916307	0.302816	10.6852	11.7693	11.4578
chr8	141117278	141195808	78531	+	DENND3	protein_coding	ENSG00000105339	ENSG00000105339.11	1373.45	-1.92384	-1.18723	-0.526943	5.871e-15	9.34445e-07	0.0178951	TRUE	TRUE	FALSE	down.early	1761	2945	3136	1182	1032	1128	546	726	369	1.18798	-0.225208	-0.962771	11.3416	10.1747	9.56574
chr19	4838341	4867694	29354	-	PLIN3	protein_coding	ENSG00000105355	ENSG00000105355.9	6501.78	-0.351123	0.770435	-1.22022	0.0691448	3.50566e-05	1.77995e-10	FALSE	TRUE	TRUE	down.late	4356	6278	5930	11216	10034	8947	4230	4711	3152	-0.232154	1.17982	-0.947664	12.4574	13.2814	12.0398
chr19	50188186	50310542	122357	+	MYH14	protein_coding	ENSG00000105357	ENSG00000105357.19	709.22	8.67239	2.09533	6.42932	1.43596e-96	3.30224e-06	6.29059e-101	TRUE	TRUE	TRUE	up.late	7	4	7	30	20	18	1793	2299	1248	-0.75993	-0.561332	1.32126	6.64284	7.06786	11.0968
chr19	10251901	10260055	8155	+	MRPL4	protein_coding	ENSG00000105364	ENSG00000105364.14	3301.1	0.3457	0.270216	0.0531975	0.00681928	0.0341407	0.767459	TRUE	FALSE	FALSE	up.early	2115	3315	2951	3599	4045	3086	3589	3780	3444	-1.18561	0.428183	0.757428	11.5267	11.823	11.8834
chr19	10289952	10296778	6827	+	ICAM5	protein_coding	ENSG00000105376	ENSG00000105376.5	146.378	4.06445	2.54434	1.3372	2.37141e-30	1.68213e-12	1.25172e-05	TRUE	TRUE	TRUE	up.early	12	22	25	136	110	84	359	368	166	-1.13354	0.0217977	1.11174	6.96149	7.90777	8.80049
chr19	41708585	41730433	21849	+	CEACAM5	protein_coding	ENSG00000105388	ENSG00000105388.16	301.804	7.69498	0.572702	5.71354	1.39865e-13	0.164812	2.3651e-08	TRUE	FALSE	TRUE	up.late	2	6	4	1	8	7	693	990	735	-0.726577	-0.592082	1.31866	6.54303	6.77132	10.0146
chr19	10350529	10380572	30044	-	TYK2	protein_coding	ENSG00000105397	ENSG00000105397.14	2367.16	0.2421	0.387202	-0.142994	0.0707165	0.0018714	0.328353	FALSE	TRUE	FALSE	up.early	1510	2185	2022	2686	3275	2400	2198	2875	2419	-1.12896	0.96537	0.163592	11.07	11.4746	11.3197
chr19	47487637	47515091	27455	-	NAPA	protein_coding	ENSG00000105402	ENSG00000105402.8	3856.73	-0.698761	-0.06087	-0.615752	3.78992e-09	0.71746	1.81384e-07	TRUE	FALSE	TRUE	down.late	3764	4996	5084	4423	4779	3749	2478	2798	2852	0.75492	0.540176	-1.2951	12.1932	12.1199	11.4938
chr19	47403124	47419527	16404	-	MEIS3	protein_coding	ENSG00000105419	ENSG00000105419.18	242.627	1.49728	2.17118	-0.394373	1.93309e-06	1.8301e-11	0.120576	TRUE	TRUE	FALSE	up.early	46	111	102	512	319	370	266	307	154	-1.15667	0.901786	0.254887	7.69165	9.02394	8.60525
chr19	5158495	5340803	182309	-	PTPRS	protein_coding	ENSG00000105426	ENSG00000105426.17	3231.82	5.7236	5.50032	0.151258	1.46665e-125	8.16063e-116	0.514859	TRUE	TRUE	FALSE	up.early	41	82	113	5177	5221	4496	5574	7246	4763	-1.32514	0.614381	0.710754	7.79829	12.1428	12.3587
chr19	42325609	42378769	53161	+	MEGF8	protein_coding	ENSG00000105429	ENSG00000105429.13	5187.77	-0.399964	0.447675	-0.937118	0.036188	0.0135976	6.20031e-07	FALSE	FALSE	TRUE	down.late	3101	5735	6105	8386	7224	6163	3127	3934	3479	-0.0663279	1.07325	-1.00693	12.2845	12.8126	11.8485
chr19	48445841	48457022	11182	+	GRWD1	protein_coding	ENSG00000105447	ENSG00000105447.13	4163.02	-0.132551	0.348836	-0.500768	0.5	0.0338441	0.00211586	FALSE	FALSE	TRUE	down.late	3437	4344	3804	5389	6200	4690	2661	3229	4075	-0.287577	1.08539	-0.797809	11.9625	12.3712	11.8106
chr19	48394875	48444931	50057	+	GRIN2D	protein_coding	ENSG00000105464	ENSG00000105464.3	71.5937	-1.41262	-0.801437	-0.337043	2.18819e-06	0.00309769	0.186853	TRUE	TRUE	FALSE	down.early	68	160	131	63	68	48	34	45	40	1.18542	-0.267548	-0.91787	7.94259	7.49383	7.29297
chr19	50723364	50725718	2355	+	CLEC11A	protein_coding	ENSG00000105472	ENSG00000105472.13	118.006	1.1283	0.447504	0.485184	1.69422e-06	0.0434909	0.0236369	TRUE	FALSE	FALSE	up.early	49	93	78	105	133	103	182	185	139	-1.06346	-0.061929	1.12539	7.61926	7.91228	8.25966
chr19	48180770	48255946	75177	-	CARD8	protein_coding	ENSG00000105483	ENSG00000105483.18	395.667	-0.484747	0.0816303	-0.565037	0.0025702	0.681054	0.000253289	TRUE	FALSE	TRUE	down.late	305	423	488	446	721	529	258	270	266	0.451697	0.795449	-1.24715	9.1653	9.2446	8.77341
chr19	51571283	51592510	21228	+	ZNF175	protein_coding	ENSG00000105497	ENSG00000105497.8	334.555	-0.517323	0.224275	-0.858528	0.0490355	0.365222	0.0013763	FALSE	FALSE	TRUE	down.late	217	308	326	336	496	436	243	281	261	0.157278	0.851278	-1.00856	8.91284	9.19622	8.43681
chr19	48630030	48637379	7350	-	DBP	protein_coding	ENSG00000105516	ENSG00000105516.11	286.155	1.37075	0.575618	0.238984	0.0063618	0.112634	0.465832	TRUE	FALSE	FALSE	up.early	83	152	151	252	237	211	594	640	154	-0.871418	0.232821	0.638597	7.9503	8.73124	9.01821
chr19	5912339	5916211	3873	+	CAPS	protein_coding	ENSG00000105519	ENSG00000105519.18	3401.5	5.16727	-0.701866	6.09276	1.46461e-63	0.0108038	1.97313e-86	TRUE	FALSE	TRUE	up.late	201	290	294	214	113	106	11768	11290	5578	-0.531511	-0.780639	1.31215	8.6662	8.05298	13.2043
chr19	48600810	48614854	14045	-	FAM83E	protein_coding	ENSG00000105523	ENSG00000105523.3	53.0624	-2.13137	-2.18815	0.029209	7.59808e-10	4.625e-10	0.937964	TRUE	TRUE	FALSE	down.early	91	181	158	19	28	15	24	29	14	1.30701	-0.671675	-0.635335	7.92268	7.05208	7.06807
chr19	48795062	48811029	15968	-	BCAT2	protein_coding	ENSG00000105552	ENSG00000105552.15	3158.87	0.643324	0.342248	0.224821	0.000147731	0.0416198	0.209267	TRUE	FALSE	FALSE	up.early	1735	2996	2454	3509	3525	2682	3702	4670	3387	-1.06653	0.123403	0.94313	11.3022	11.7011	11.976
chr19	301444	344815	43372	-	MIER2	protein_coding	ENSG00000105556	ENSG00000105556.11	1193.45	0.830784	0.003385	0.823421	1.25094e-10	0.989452	1.78216e-10	TRUE	FALSE	TRUE	up.late	693	1038	986	955	1217	863	1586	1831	1602	-0.659029	-0.650365	1.30939	10.0815	10.0849	10.8608
chr19	52190048	52229518	39471	+	PPP2R1A	protein_coding	ENSG00000105568	ENSG00000105568.18	17256	-0.360399	0.0631164	-0.416688	0.015404	0.747209	0.00361791	FALSE	FALSE	TRUE	down.late	14692	21949	19594	20312	21722	16465	12921	15675	12927	0.432745	0.710168	-1.14291	14.1762	14.2452	13.7846
chr19	12699194	12724011	24818	-	TNPO2	protein_coding	ENSG00000105576	ENSG00000105576.15	4899.92	0.376342	0.224415	0.129252	0.000475088	0.0455721	0.307127	TRUE	FALSE	FALSE	up.early	3581	4345	4356	4555	6315	4406	4960	6600	5442	-1.18974	0.190156	0.999587	12.086	12.3273	12.4688
chr19	12875209	12881466	6258	-	DNASE2	protein_coding	ENSG00000105612	ENSG00000105612.9	1487.18	-0.735076	-0.511816	-0.154602	3.56949e-05	0.00347164	0.441673	TRUE	TRUE	FALSE	down.early	1515	2273	2257	1489	1322	1176	1165	1314	932	1.16389	-0.343903	-0.819989	11.0704	10.507	10.3292
chr19	18001132	18014102	12971	+	ARRDC2	protein_coding	ENSG00000105643	ENSG00000105643.10	668.797	-0.391149	0.518132	-1.02052	0.0572729	0.00755884	6.09907e-07	FALSE	TRUE	TRUE	down.late	484	669	647	1062	846	950	405	513	425	-0.111315	1.09221	-0.980895	9.56837	10.0767	9.20108
chr19	18153163	18170532	17370	+	PIK3R2	protein_coding	ENSG00000105647	ENSG00000105647.19	3041.71	0.0140289	0.794271	-0.773537	0.946683	1.49453e-08	2.97543e-08	FALSE	TRUE	TRUE	down.late	1688	2728	2913	4379	4483	4155	2230	2615	2394	-0.667805	1.28257	-0.614768	11.3111	12.1162	11.333
chr19	18434388	18438167	3780	-	ISYNA1	protein_coding	ENSG00000105655	ENSG00000105655.19	309.737	4.88933	0.343842	4.31621	1.02829e-58	0.18691	4.34219e-52	TRUE	FALSE	TRUE	up.late	22	25	27	37	32	49	1068	1261	803	-0.72163	-0.597547	1.31918	7.1446	7.31537	9.95333
chr19	18919705	18929189	9485	+	DDX49	protein_coding	ENSG00000105671	ENSG00000105671.12	2007.22	0.476175	0.721899	-0.208634	0.00410707	8.97298e-06	0.233827	TRUE	TRUE	FALSE	up.early	1227	1702	1548	2571	2787	2039	1862	1973	2324	-1.14614	0.914993	0.231145	10.6396	11.3584	11.12
chr19	35545600	35547526	1927	+	TMEM147	protein_coding	ENSG00000105677	ENSG00000105677.12	3911.21	-0.360844	-0.196499	-0.137982	0.00321511	0.12878	0.329426	TRUE	FALSE	FALSE	down.early	3510	5224	4640	3732	4605	3446	3428	3661	3172	1.10525	-0.118311	-0.986941	12.1756	11.9585	11.8044
chr19	35248330	35267964	19635	+	LSR	protein_coding	ENSG00000105699	ENSG00000105699.16	5424.5	-0.173608	-1.48805	1.29324	0.272975	1.17646e-26	2.37914e-20	FALSE	TRUE	TRUE	down.early	5877	8263	7699	2601	3119	2168	6115	7263	5753	0.793372	-1.30539	0.512014	12.8673	11.4023	12.6709
chr19	19276018	19320509	44492	-	SUGP1	protein_coding	ENSG00000105705	ENSG00000105705.16	785.864	-0.241893	0.287056	-0.551333	0.119853	0.04774	8.94572e-05	FALSE	FALSE	TRUE	down.late	635	820	804	973	1088	955	496	684	681	-0.0807901	1.11978	-1.03899	9.83153	10.1214	9.60014
chr19	19710472	19733112	22641	-	ZNF14	protein_coding	ENSG00000105708	ENSG00000105708.9	46.1176	-7.64272	-5.33476	-1.06257	3.58778e-11	6.66977e-20	0.0651941	TRUE	TRUE	FALSE	down.early	97	158	154	4	2	3	0	1	0	1.31912	-0.520819	-0.798298	8.0655	6.56289	6.33628
chr19	35030470	35040449	9980	+	SCN1B	protein_coding	ENSG00000105711	ENSG00000105711.13	31.8603	1.39803	3.06166	-1.18039	0.00114722	6.46968e-11	0.00136382	TRUE	TRUE	TRUE	up.early	6	10	7	61	74	59	19	22	24	-1.07475	1.19117	-0.11642	6.71413	7.55409	7.06938
chr19	19561707	19618693	56987	-	PBX4	protein_coding	ENSG00000105717	ENSG00000105717.14	82.2364	0.875492	-0.265359	1.35428	0.00049052	0.273558	8.73847e-07	TRUE	FALSE	TRUE	up.late	61	82	51	48	57	42	148	156	104	-0.358094	-0.884682	1.24278	7.55767	7.39595	8.0493
chr19	42247569	42255128	7560	-	ERF	protein_coding	ENSG00000105722	ENSG00000105722.10	2820.67	0.281813	0.647112	-0.33735	0.0409297	5.14002e-07	0.0106984	FALSE	TRUE	FALSE	up.early	1639	2563	2192	3594	4087	3434	2478	2955	2746	-1.06095	1.13638	-0.0754257	11.1945	11.8497	11.4884
chr19	19645198	19663676	18479	-	ATP13A1	protein_coding	ENSG00000105726	ENSG00000105726.17	3006.93	-0.249882	0.172021	-0.432132	0.114223	0.288978	0.00302535	FALSE	FALSE	TRUE	down.late	2243	3466	3145	3752	3885	3111	2159	2522	2956	0.0954785	0.947161	-1.04264	11.6317	11.835	11.36
chr19	41998321	42069498	71178	-	GRIK5	protein_coding	ENSG00000105737	ENSG00000105737.9	15.6754	1.75057	0.295111	0.702017	0.003216	0.380803	0.0811248	TRUE	FALSE	FALSE	up.late	4	7	4	15	4	13	27	35	31	-0.809512	-0.312594	1.12211	6.66919	6.79597	7.16201
chr19	20923222	20950697	27476	+	ZNF85	protein_coding	ENSG00000105750	ENSG00000105750.15	126.495	-3.16849	-0.87856	-2.11968	5.9565e-29	0.000189347	2.70346e-13	TRUE	TRUE	TRUE	down.early	201	248	270	88	134	116	20	23	37	1.06398	0.140877	-1.20486	8.55162	7.95686	7.08979
chr19	43622368	43639850	17483	-	CADM4	protein_coding	ENSG00000105767	ENSG00000105767.3	183.781	0.55229	-1.48475	2.20635	0.0248352	1.25657e-07	2.84033e-15	FALSE	TRUE	TRUE	up.late	143	185	237	81	57	40	339	360	256	0.219476	-1.20517	0.985699	8.34084	7.51979	8.78243
chr7	32495426	32588726	93301	+	AVL9	protein_coding	ENSG00000105778	ENSG00000105778.19	2750.54	-0.33507	-0.596315	0.238295	0.0177712	9.51258e-06	0.100877	FALSE	TRUE	FALSE	down.early	3070	3871	4564	2025	2678	2266	1898	2474	2421	1.12791	-1.02585	-0.102062	11.8008	11.1864	11.4499
chr7	90245174	90311063	65890	+	CFAP69	protein_coding	ENSG00000105792	ENSG00000105792.19	77.7424	-1.18705	-0.818782	-0.124576	0.00283438	0.0209818	0.703041	TRUE	FALSE	FALSE	down.early	74	97	149	52	49	96	38	45	43	0.981863	-0.385356	-0.596507	7.99577	7.43952	7.35362
chr7	90335223	90391453	56231	+	GTPBP10	protein_coding	ENSG00000105793	ENSG00000105793.16	943.762	-0.147416	-0.522245	0.352698	0.422775	0.00081594	0.026803	FALSE	TRUE	FALSE	down.early	1027	1246	1421	632	978	720	792	880	892	0.864526	-1.14393	0.279402	10.2988	9.78012	10.1477
chr7	103297435	103329511	32077	+	PMPCB	protein_coding	ENSG00000105819	ENSG00000105819.14	2519.98	-0.690188	-0.606403	-0.0642374	2.48045e-08	9.81375e-07	0.715591	TRUE	TRUE	FALSE	down.early	2902	3379	3875	2042	2543	2053	1963	2225	1801	1.28806	-0.533573	-0.754484	11.78	11.1697	11.0957
chr7	106248298	106286326	38029	-	NAMPT	protein_coding	ENSG00000105835	ENSG00000105835.12	6682.52	0.973029	0.309655	0.532668	8.52774e-07	0.108322	0.00539938	TRUE	FALSE	TRUE	up.late	3631	3982	5542	4294	7094	7263	9509	10403	9008	-0.922393	-0.19355	1.11594	12.1886	12.5609	13.2298
chr7	95359872	95396375	36504	-	PON3	protein_coding	ENSG00000105852	ENSG00000105852.11	42.9266	-0.721417	-1.4099	0.374466	0.0126948	2.38865e-05	0.166889	FALSE	TRUE	FALSE	down.early	57	83	73	26	25	20	34	35	35	1.21752	-0.998426	-0.219091	7.5972	7.05906	7.24832
chr7	95404862	95435329	30468	-	PON2	protein_coding	ENSG00000105854	ENSG00000105854.13	2797.02	-1.91958	-0.161633	-1.71007	9.45926e-32	0.367533	2.43096e-25	TRUE	FALSE	TRUE	down.late	3189	4031	4708	2663	3679	3789	1007	1063	1050	0.775951	0.530186	-1.30614	11.9989	11.7863	10.1982
chr7	20330702	20415754	85053	+	ITGB8	protein_coding	ENSG00000105855	ENSG00000105855.10	9227.7	-2.20529	-1.86875	-0.28128	3.48893e-52	9.43099e-38	0.0647418	TRUE	TRUE	FALSE	down.early	15553	18156	21877	3810	5694	5882	3235	4124	4854	1.31094	-0.498637	-0.812303	14.199	12.334	12.0108
chr7	107563484	107578523	15040	+	DUS4L	protein_coding	ENSG00000105865	ENSG00000105865.11	425.708	0.0316746	-0.942993	0.988457	0.894597	7.21539e-08	1.93342e-08	FALSE	TRUE	TRUE	up.late	387	500	585	240	301	271	488	539	478	0.594428	-1.2791	0.684674	9.34192	8.61376	9.37699
chr7	135183839	135211534	27696	-	WDR91	protein_coding	ENSG00000105875	ENSG00000105875.14	459.07	-1.38873	-0.658912	-0.608803	1.58373e-15	0.000113998	0.000402033	TRUE	TRUE	TRUE	down.early	510	748	765	376	424	367	256	339	282	1.1531	-0.0625639	-1.09054	9.72344	9.13532	8.63801
chr7	21543039	21901839	358801	+	DNAH11	protein_coding	ENSG00000105877	ENSG00000105877.18	565.904	-5.62836	-0.874543	-3.90859	5.39756e-15	0.0418951	7.4307e-08	TRUE	FALSE	TRUE	down.early	927	1878	2052	434	557	463	9	10	14	1.0536	0.148373	-1.20197	10.4494	9.06943	7.01092
chr7	135926760	135977359	50600	-	MTPN	protein_coding	ENSG00000105887	ENSG00000105887.11	9897.6	-0.642792	-0.555678	-0.0618399	2.42831e-06	4.29118e-05	0.747665	TRUE	TRUE	FALSE	down.early	10326	13123	15615	6211	10938	9466	6866	8981	8591	1.25245	-0.525136	-0.727315	13.6839	13.0806	13.012
chr7	24698355	24757940	59586	-	GSDME	protein_coding	ENSG00000105928	ENSG00000105928.16	799.933	4.14954	3.29054	0.77367	1.85817e-102	4.73927e-64	6.52593e-06	TRUE	TRUE	TRUE	up.early	77	78	107	832	928	769	1433	1640	1148	-1.28808	0.365993	0.922083	7.71543	9.92877	10.6729
chr7	138706294	138799560	93267	-	ATP6V0A4	protein_coding	ENSG00000105929	ENSG00000105929.16	28.1202	0.577711	-0.518111	1.57344	0.0735373	0.0930692	0.000128563	FALSE	FALSE	TRUE	up.late	30	17	24	14	16	16	28	62	43	-0.0856115	-1.06546	1.15107	7.08984	6.87243	7.36424
chr7	139133744	139191986	58243	+	TTC26	protein_coding	ENSG00000105948	ENSG00000105948.13	397.574	-0.784802	-0.22223	-0.401848	0.0021343	0.356915	0.0895812	TRUE	FALSE	FALSE	down.early	455	507	586	293	569	448	189	235	325	0.858898	0.10474	-0.963638	9.37328	9.07603	8.65495
chr7	44606572	44709066	102495	+	OGDH	protein_coding	ENSG00000105953	ENSG00000105953.15	8884.13	-0.633604	-0.470901	-0.134752	7.93047e-09	1.90869e-05	0.308457	TRUE	TRUE	FALSE	down.early	8626	13080	12868	8039	9405	7424	6575	8151	6563	1.26961	-0.382035	-0.88758	13.4947	12.9986	12.8468
chr7	897900	955407	57508	-	ADAP1	protein_coding	ENSG00000105963	ENSG00000105963.15	3427.69	0.102035	-2.11476	2.24737	0.695379	1.11976e-20	2.87715e-23	FALSE	TRUE	TRUE	up.late	3361	5511	4720	888	1317	874	5158	5541	3302	0.605659	-1.2893	0.683639	12.1556	10.1543	12.238
chr7	44826791	44848087	21297	-	H2AZ2	protein_coding	ENSG00000105968	ENSG00000105968.19	5998.3	-0.710387	-0.344197	-0.304438	3.34679e-07	0.0144163	0.0350411	TRUE	FALSE	FALSE	down.early	6711	8660	8694	5676	7601	5625	3643	4315	4139	1.11298	-0.0596414	-1.05333	12.9276	12.5318	12.1963
chr7	116287380	116508541	221162	+	CAV2	protein_coding	ENSG00000105971	ENSG00000105971.15	7530.77	-0.736173	-0.733836	0.00277104	2.97935e-07	3.4649e-07	0.995634	TRUE	TRUE	FALSE	down.early	9368	10148	11570	4427	7759	6672	5853	6619	5671	1.26754	-0.643678	-0.623857	13.3678	12.5952	12.6032
chr7	116524994	116561179	36186	+	CAV1	protein_coding	ENSG00000105974	ENSG00000105974.13	35437.7	-1.30492	-0.322483	-0.935789	1.77355e-27	0.00941624	1.02488e-14	TRUE	TRUE	TRUE	down.late	46188	50684	56437	26605	53632	42863	15087	18463	20609	0.941534	0.328716	-1.27025	15.5807	15.2141	14.2576
chr7	116672196	116798377	126182	+	MET	protein_coding	ENSG00000105976	ENSG00000105976.16	11386.9	-0.165509	-1.21129	1.00793	0.407162	7.36554e-12	1.2514e-08	FALSE	TRUE	TRUE	down.early	13159	14078	17139	4346	8946	6509	11869	15296	11306	0.792614	-1.25845	0.465836	13.8796	12.6149	13.6781
chr7	156668946	156893216	224271	-	LMBR1	protein_coding	ENSG00000105983	ENSG00000105983.22	2858.89	-0.641119	-0.254658	-0.301042	0.000334321	0.158177	0.0948325	TRUE	FALSE	FALSE	down.early	2804	3484	4378	2309	3617	3440	1625	2191	2275	0.958757	0.0349898	-0.993747	11.8446	11.5327	11.1854
chr7	157335381	157417439	82059	+	DNAJB6	protein_coding	ENSG00000105993	ENSG00000105993.15	3775.93	-0.56044	-0.579323	0.0258596	2.83401e-05	1.21541e-05	0.9047	TRUE	TRUE	FALSE	down.early	4846	5443	6071	2661	3980	3202	2474	3047	3094	1.26179	-0.676895	-0.584899	12.3042	11.6977	11.7265
chr7	27100354	27102686	2333	-	HOXA2	protein_coding	ENSG00000105996	ENSG00000105996.7	78.5483	-1.30937	0.250873	-1.74584	2.5055e-06	0.275775	1.01199e-09	TRUE	FALSE	TRUE	down.late	57	109	107	119	125	108	32	30	33	0.34236	0.918688	-1.26105	7.74728	7.94461	7.19826
chr7	2512529	2529177	16649	+	LFNG	protein_coding	ENSG00000106003	ENSG00000106003.13	817.771	-1.95857	-1.04525	-0.818111	5.89176e-32	1.73723e-10	9.21928e-07	TRUE	TRUE	TRUE	down.early	995	1802	1530	706	819	535	330	377	367	1.19244	-0.119459	-1.07298	10.6135	9.66651	8.97819
chr7	2537810	2555694	17885	-	BRAT1	protein_coding	ENSG00000106009	ENSG00000106009.16	3016.03	-0.75343	-0.250439	-0.403255	4.44826e-05	0.179328	0.0262448	TRUE	FALSE	FALSE	down.early	2804	4744	3962	3642	3083	2303	2145	2453	2083	0.957458	0.0938742	-1.05133	11.9559	11.6197	11.1739
chr7	2558972	2614733	55762	+	IQCE	protein_coding	ENSG00000106012	ENSG00000106012.18	1153.69	-1.90931	-0.813713	-0.997963	1.44955e-27	1.92844e-06	1.64926e-08	TRUE	TRUE	TRUE	down.early	1802	2363	2409	1191	1111	1112	348	448	404	1.11905	0.0272505	-1.1463	11.0163	10.2054	9.33384
chr7	120787320	120858402	71083	-	TSPAN12	protein_coding	ENSG00000106025	ENSG00000106025.9	236.793	-3.51412	-6.81889	3.28637	2.41305e-58	1.18857e-62	1.36978e-14	TRUE	TRUE	TRUE	down.early	506	587	791	5	5	6	70	54	59	1.28569	-0.942231	-0.343462	9.63704	6.67238	7.46915
chr7	27193503	27200091	6589	-	HOXA13	protein_coding	ENSG00000106031	ENSG00000106031.9	7.1069	2.09462	0.358573	0.596714	0.00810659	0.327843	0.154893	TRUE	FALSE	FALSE	up.early	4	0	0	2	8	4	10	18	18	-0.949322	-0.112542	1.06186	6.40461	6.6163	6.9134
chr7	27525442	27662883	137442	-	HIBADH	protein_coding	ENSG00000106049	ENSG00000106049.9	2054.03	-1.08694	-1.15901	0.0514196	2.77614e-12	1.67076e-13	0.819398	TRUE	TRUE	FALSE	down.early	2590	3516	3692	1428	1501	1397	1500	1727	1187	1.2947	-0.691072	-0.603624	11.7377	10.613	10.6625
chr7	27739331	27844564	105234	+	TAX1BP1	protein_coding	ENSG00000106052	ENSG00000106052.13	2904.75	-0.718648	-0.963811	0.17986	0.000170417	6.51593e-07	0.384665	TRUE	TRUE	FALSE	down.early	3541	4065	4954	1491	2508	2329	2534	2700	2022	1.18389	-0.832281	-0.351612	12.0938	11.0841	11.3248
chr7	28995235	29195451	200217	-	CPVL	protein_coding	ENSG00000106066	ENSG00000106066.15	358.842	-6.27045	-2.10922	-4.13574	7.18967e-73	2.1979e-31	1.45694e-31	TRUE	TRUE	TRUE	down.early	770	1125	1212	239	280	245	7	7	9	1.1603	-0.0170039	-1.1433	9.98755	8.38516	6.85221
chr7	29146569	29514328	367760	+	CHN2	protein_coding	ENSG00000106069	ENSG00000106069.23	39.0212	-1.10265	0.0158245	-1.17243	0.00716858	0.968407	0.00576529	TRUE	FALSE	TRUE	down.late	28	35	42	56	72	68	14	16	19	0.558615	0.559102	-1.11772	7.39854	7.39867	6.94417
chr7	50590063	50793462	203400	-	GRB10	protein_coding	ENSG00000106070	ENSG00000106070.20	854.874	3.66817	3.84003	-0.106814	5.22546e-37	1.96265e-40	0.702122	TRUE	TRUE	FALSE	up.early	111	71	75	1218	1625	1240	1144	1342	868	-1.31091	0.720518	0.590394	7.73752	10.5126	10.3349
chr7	73736094	73738867	2774	-	ABHD11	protein_coding	ENSG00000106077	ENSG00000106077.18	1068.5	-0.924445	-1.32462	0.310983	1.97446e-08	3.03772e-15	0.0672531	TRUE	TRUE	FALSE	down.early	1515	1974	1662	629	867	526	755	947	805	1.24637	-0.921036	-0.325331	10.8436	9.64272	9.97278
chr7	51016212	51316818	300607	-	COBL	protein_coding	ENSG00000106078	ENSG00000106078.19	981.461	-0.781429	-1.54067	0.631671	1.34703e-05	5.74605e-17	0.000409418	TRUE	TRUE	TRUE	down.early	1499	1594	1617	473	848	501	648	900	713	1.15731	-1.07506	-0.0822457	10.738	9.37	9.97842
chr7	30027404	30130483	103080	+	PLEKHA8	protein_coding	ENSG00000106086	ENSG00000106086.20	816.334	-0.579352	-0.430243	-0.115197	4.08276e-06	0.000588456	0.461442	TRUE	TRUE	FALSE	down.early	808	1013	1184	618	968	700	668	715	708	1.27531	-0.40682	-0.868494	10.2064	9.79805	9.68597
chr7	73699206	73719672	20467	-	STX1A	protein_coding	ENSG00000106089	ENSG00000106089.12	603.445	0.689456	0.0969501	0.544648	1.12769e-05	0.621676	0.000428862	TRUE	FALSE	TRUE	up.late	364	562	558	526	613	448	724	820	829	-0.783237	-0.460832	1.24407	9.28857	9.38549	9.89801
chr7	30424527	30478784	54258	-	NOD1	protein_coding	ENSG00000106100	ENSG00000106100.11	640.762	-0.437917	-0.172767	-0.224377	0.00215147	0.262261	0.136691	TRUE	FALSE	FALSE	down.early	587	825	722	702	762	654	458	572	517	1.03204	0.0695957	-1.10164	9.80102	9.62596	9.41294
chr7	30580533	30634033	53501	+	GARS1	protein_coding	ENSG00000106105	ENSG00000106105.15	8329.38	-0.87676	-0.489865	-0.350303	1.54634e-17	2.6765e-06	0.00107548	TRUE	TRUE	TRUE	down.early	9587	11844	11870	7390	8944	7672	5392	6477	5974	1.19907	-0.119389	-1.07968	13.468	12.9577	12.586
chr7	142855061	142871094	16034	+	EPHB6	protein_coding	ENSG00000106123	ENSG00000106123.12	485.898	-0.0910409	1.21719	-1.37735	0.761625	3.55069e-06	2.88435e-07	FALSE	TRUE	TRUE	down.late	245	332	357	1042	581	890	269	319	334	-0.51099	1.17937	-0.66838	8.87804	9.87535	8.78518
chr7	30771417	30892387	120971	+	MINDY4	protein_coding	ENSG00000106125	ENSG00000106125.14	511.047	-1.9722	-0.814343	-1.04008	5.54152e-24	1.42648e-05	1.33832e-07	TRUE	TRUE	TRUE	down.early	761	840	945	347	587	479	190	202	249	1.12049	0.0175138	-1.13801	9.97523	9.23293	8.45526
chr7	72947581	72954790	7210	-	NSUN5P2	transcribed_unprocessed_pseudogene	ENSG00000106133	ENSG00000106133.18	487.119	-0.612989	-1.00079	0.285432	0.00278895	1.7339e-06	0.162906	TRUE	TRUE	FALSE	down.early	498	895	725	375	383	250	412	395	474	1.14026	-0.934157	-0.206105	9.72007	8.8692	9.16782
chr7	143288215	143307696	19482	+	CASP2	protein_coding	ENSG00000106144	ENSG00000106144.20	2322.74	-0.963706	-0.675643	-0.215552	2.07861e-08	8.35635e-05	0.241315	TRUE	TRUE	FALSE	down.early	2860	3454	3604	1701	2647	1846	1149	1675	2127	1.20735	-0.324495	-0.882852	11.7724	11.053	10.7908
chr7	56101573	56106476	4904	-	CHCHD2	protein_coding	ENSG00000106153	ENSG00000106153.13	13898.3	-0.51621	-0.545091	0.0415408	0.0069908	0.00335781	0.876106	TRUE	TRUE	FALSE	down.early	13164	22635	19026	13853	11984	9409	13184	12886	9706	1.10016	-0.628682	-0.47148	14.1491	13.4976	13.5569
chr7	76302673	76304295	1623	+	HSPB1	protein_coding	ENSG00000106211	ENSG00000106211.10	13577.7	-1.15168	-1.2004	0.0310301	6.18806e-11	1.63174e-11	0.906247	TRUE	TRUE	FALSE	down.early	16576	27455	22470	10250	9620	8236	10259	10569	7439	1.27539	-0.661344	-0.614048	14.4295	13.1882	13.2185
chr7	99392048	99408597	16550	-	PDAP1	protein_coding	ENSG00000106244	ENSG00000106244.13	4125.27	-0.536429	-0.301769	-0.185051	0.000147505	0.0341489	0.237301	TRUE	FALSE	FALSE	down.early	4364	5384	5462	3455	5304	3527	2791	3446	3735	1.12322	-0.169244	-0.953978	12.3428	11.9955	11.7847
chr7	99416739	99466163	49425	-	PTCD1	protein_coding	ENSG00000106246	ENSG00000106246.18	504.946	-0.511942	-0.0304417	-0.436464	0.00901198	0.906633	0.0207659	TRUE	FALSE	FALSE	down.late	539	628	657	533	567	534	313	389	391	0.631718	0.448743	-1.08046	9.49266	9.44405	9.03776
chr7	99648194	99679998	31805	-	CYP3A5	protein_coding	ENSG00000106258	ENSG00000106258.15	17.3889	4.13085	0.0149867	4.10093	2.85309e-05	0.973167	9.30437e-06	TRUE	FALSE	TRUE	up.late	1	3	1	1	1	5	79	69	24	-0.613168	-0.588905	1.20207	6.51554	6.5265	7.3357
chr7	100015572	100041689	26118	+	ZKSCAN1	protein_coding	ENSG00000106261	ENSG00000106261.17	4427.15	-0.563524	-0.507504	-0.0258416	0.000896309	0.00226587	0.921556	TRUE	TRUE	FALSE	down.early	4448	6254	7822	3305	4375	3846	3056	4339	3203	1.15816	-0.516232	-0.641928	12.5186	11.9506	11.9079
chr7	2354086	2380745	26660	+	EIF3B	protein_coding	ENSG00000106263	ENSG00000106263.18	15903.6	-0.49601	-0.162581	-0.283988	0.000980145	0.328325	0.0653008	TRUE	FALSE	FALSE	down.early	15404	21972	18659	17787	18672	13499	11631	12325	13932	0.913955	0.155885	-1.06984	14.1958	13.9911	13.6601
chr7	2251770	2354318	102549	-	SNX8	protein_coding	ENSG00000106266	ENSG00000106266.11	1725.52	-0.0301267	-0.957395	0.920014	0.901638	6.28158e-08	2.13494e-07	FALSE	TRUE	TRUE	up.late	1990	2940	2532	1175	1227	850	1770	1890	1347	0.67427	-1.24781	0.573538	11.1314	10.2074	11.0829
[truncated: 7,386 more rows]
